# Supplementary material for: Seismic monitoring of small alpine rockfalls – validity, precision and limitations
Source: Copernicus journal article supplement (doi:10.5194/esurf-5-653-2017), 2017-10-16
Supplement: Supplementary file 1 [file esurf-5-653-2017-supplement.zip]

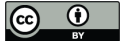

## *Supplement of*

# **Seismic monitoring of small alpine rockfalls – validity, precision and limitations**

**Michael Dietze et al.**

*Correspondence to:* Michael Dietze ([mdietze@gfz-potsdam.de](mailto:mdietze@gfz-potsdam.de))

- [esurf-5-653-2017-supplement-title-page.pdf](#)
- [event\\_1.txt](#)
- [event\\_10.txt](#)
- [event\\_2.txt](#)
- [event\\_3.txt](#)
- [event\\_4.txt](#)
- [event\\_5.txt](#)
- [event\\_6.txt](#)
- [event\\_7.txt](#)
- [event\\_8.txt](#)
- [event\\_9.txt](#)
- [lidar.txt](#)
- [seismic\\_stations.txt](#)
- [supplementary\\_material.pdf](#)

The copyright of individual parts of the supplement might differ from the CC BY 3.0 License.
