# Supplementary material for: Seismic monitoring of small alpine rockfalls – validity, precision and limitations
Source: Copernicus journal article supplement (doi:10.5194/esurf-5-653-2017), 2017-10-16
Supplement: Supplementary file 2 [file esurf-5-653-2017-supplement.zip]

Archive with 14 entries (14 files):
- event_1.txt
- event_8.txt
- supplementary_material.pdf
- event_2.txt
- event_4.txt
- event_6.txt
- event_10.txt
- lidar.txt
- seismic_stations.txt
- esurf-5-653-2017-supplement-title-page.pdf
- event_5.txt
- event_9.txt
- event_7.txt
- event_3.txt
