# Supplementary material for: Seismic monitoring of small alpine rockfalls – validity, precision and limitations
Source: Copernicus journal article supplement (doi:10.5194/esurf-5-653-2017), 2017-10-16
Supplement: Supplementary file 2 [file esurf-5-653-2017-supplement.zip › event_1.txt]

Time	LAU02	LAU03	LAU04	LAU05
2014-10-12 22:45:20.005	61436	59069	63202	63488
2014-10-12 22:45:20.009	61467	59070	63174	63489
2014-10-12 22:45:20.015	61449	59062	63162	63492
2014-10-12 22:45:20.019	61432	59060	63163	63512
2014-10-12 22:45:20.025	61445	59059	63145	63510
2014-10-12 22:45:20.029	61451	59060	63157	63527
2014-10-12 22:45:20.035	61458	59066	63168	63541
2014-10-12 22:45:20.039	61444	59061	63154	63508
2014-10-12 22:45:20.045	61448	59062	63161	63455
2014-10-12 22:45:20.049	61451	59080	63143	63445
2014-10-12 22:45:20.055	61435	59061	63109	63451
2014-10-12 22:45:20.059	61446	59050	63107	63436
2014-10-12 22:45:20.065	61454	59078	63111	63419
2014-10-12 22:45:20.069	61445	59073	63123	63419
2014-10-12 22:45:20.075	61444	59064	63128	63410
2014-10-12 22:45:20.079	61445	59080	63128	63403
2014-10-12 22:45:20.085	61449	59071	63136	63452
2014-10-12 22:45:20.089	61444	59049	63142	63479
2014-10-12 22:45:20.095	61438	59067	63172	63497
2014-10-12 22:45:20.099	61446	59083	63198	63537
2014-10-12 22:45:20.105	61444	59059	63172	63531
2014-10-12 22:45:20.109	61436	59063	63157	63509
2014-10-12 22:45:20.115	61445	59073	63161	63493
2014-10-12 22:45:20.119	61460	59054	63157	63463
2014-10-12 22:45:20.125	61450	59059	63177	63467
2014-10-12 22:45:20.130	61441	59067	63178	63498
2014-10-12 22:45:20.134	61442	59073	63169	63474
2014-10-12 22:45:20.140	61433	59059	63157	63446
2014-10-12 22:45:20.144	61446	59044	63151	63437
2014-10-12 22:45:20.150	61448	59063	63170	63431
2014-10-12 22:45:20.154	61438	59058	63169	63463
2014-10-12 22:45:20.160	61447	59062	63170	63478
2014-10-12 22:45:20.164	61451	59069	63151	63473
2014-10-12 22:45:20.170	61446	59057	63131	63461
2014-10-12 22:45:20.174	61441	59072	63161	63487
2014-10-12 22:45:20.180	61437	59068	63168	63506
2014-10-12 22:45:20.184	61440	59063	63150	63474
2014-10-12 22:45:20.190	61453	59073	63139	63479
2014-10-12 22:45:20.194	61454	59062	63137	63445
2014-10-12 22:45:20.200	61437	59055	63123	63395
2014-10-12 22:45:20.204	61440	59068	63104	63408
2014-10-12 22:45:20.210	61448	59066	63099	63410
2014-10-12 22:45:20.214	61437	59052	63094	63413
2014-10-12 22:45:20.220	61454	59072	63113	63425
2014-10-12 22:45:20.224	61451	59081	63130	63433
2014-10-12 22:45:20.230	61429	59069	63131	63468
2014-10-12 22:45:20.234	61439	59072	63164	63526
2014-10-12 22:45:20.240	61440	59075	63184	63544
2014-10-12 22:45:20.244	61449	59084	63179	63551
2014-10-12 22:45:20.250	61453	59071	63168	63573
2014-10-12 22:45:20.255	61438	59064	63150	63559
2014-10-12 22:45:20.259	61439	59075	63148	63541
2014-10-12 22:45:20.265	61442	59066	63141	63520
2014-10-12 22:45:20.269	61443	59068	63119	63510
2014-10-12 22:45:20.275	61450	59065	63118	63477
2014-10-12 22:45:20.279	61457	59060	63130	63422
2014-10-12 22:45:20.285	61452	59071	63122	63398
2014-10-12 22:45:20.289	61449	59066	63127	63376
2014-10-12 22:45:20.295	61454	59070	63136	63415
2014-10-12 22:45:20.299	61444	59082	63129	63467
2014-10-12 22:45:20.305	61435	59073	63151	63457
2014-10-12 22:45:20.309	61437	59062	63164	63428
2014-10-12 22:45:20.315	61441	59069	63163	63412
2014-10-12 22:45:20.319	61454	59077	63171	63420
2014-10-12 22:45:20.325	61459	59067	63157	63429
2014-10-12 22:45:20.329	61443	59065	63162	63465
2014-10-12 22:45:20.335	61450	59077	63176	63519
2014-10-12 22:45:20.339	61461	59084	63181	63540
2014-10-12 22:45:20.345	61447	59070	63166	63527
2014-10-12 22:45:20.349	61455	59069	63120	63518
2014-10-12 22:45:20.355	61457	59077	63128	63522
2014-10-12 22:45:20.359	61436	59068	63145	63502
2014-10-12 22:45:20.365	61446	59075	63122	63485
2014-10-12 22:45:20.369	61452	59075	63135	63480
2014-10-12 22:45:20.375	61454	59064	63139	63490
2014-10-12 22:45:20.380	61464	59060	63115	63505
2014-10-12 22:45:20.384	61442	59066	63108	63503
2014-10-12 22:45:20.390	61442	59081	63120	63478
2014-10-12 22:45:20.394	61458	59061	63137	63417
2014-10-12 22:45:20.400	61446	59053	63117	63390
2014-10-12 22:45:20.404	61443	59079	63089	63396
2014-10-12 22:45:20.410	61456	59072	63100	63376
2014-10-12 22:45:20.414	61452	59062	63109	63384
2014-10-12 22:45:20.420	61440	59077	63107	63398
2014-10-12 22:45:20.424	61452	59084	63115	63416
2014-10-12 22:45:20.430	61451	59078	63133	63460
2014-10-12 22:45:20.434	61440	59065	63146	63480
2014-10-12 22:45:20.440	61455	59065	63144	63490
2014-10-12 22:45:20.444	61450	59067	63165	63511
2014-10-12 22:45:20.450	61447	59065	63185	63530
2014-10-12 22:45:20.454	61453	59077	63175	63540
2014-10-12 22:45:20.460	61452	59083	63174	63553
2014-10-12 22:45:20.464	61448	59074	63169	63566
2014-10-12 22:45:20.470	61449	59072	63159	63551
2014-10-12 22:45:20.474	61459	59071	63158	63523
2014-10-12 22:45:20.480	61452	59064	63155	63485
2014-10-12 22:45:20.484	61452	59066	63155	63424
2014-10-12 22:45:20.490	61448	59072	63156	63361
2014-10-12 22:45:20.494	61446	59060	63162	63361
2014-10-12 22:45:20.500	61455	59071	63157	63393
2014-10-12 22:45:20.505	61450	59084	63141	63419
2014-10-12 22:45:20.509	61448	59073	63148	63466
2014-10-12 22:45:20.515	61440	59071	63141	63457
2014-10-12 22:45:20.519	61450	59069	63120	63431
2014-10-12 22:45:20.525	61455	59072	63111	63420
2014-10-12 22:45:20.529	61449	59070	63109	63402
2014-10-12 22:45:20.535	61460	59080	63110	63434
2014-10-12 22:45:20.539	61451	59089	63103	63455
2014-10-12 22:45:20.545	61446	59057	63093	63490
2014-10-12 22:45:20.549	61450	59062	63087	63553
2014-10-12 22:45:20.555	61447	59078	63093	63574
2014-10-12 22:45:20.559	61450	59055	63098	63571
2014-10-12 22:45:20.565	61440	59068	63093	63522
2014-10-12 22:45:20.569	61445	59079	63110	63488
2014-10-12 22:45:20.575	61451	59066	63119	63481
2014-10-12 22:45:20.579	61437	59077	63125	63445
2014-10-12 22:45:20.585	61450	59082	63128	63441
2014-10-12 22:45:20.589	61454	59074	63120	63445
2014-10-12 22:45:20.595	61440	59064	63140	63434
2014-10-12 22:45:20.599	61445	59068	63149	63440
2014-10-12 22:45:20.605	61456	59071	63143	63414
2014-10-12 22:45:20.609	61442	59056	63123	63399
2014-10-12 22:45:20.615	61435	59069	63118	63424
2014-10-12 22:45:20.619	61459	59085	63163	63415
2014-10-12 22:45:20.625	61450	59075	63172	63432
2014-10-12 22:45:20.630	61442	59075	63166	63470
2014-10-12 22:45:20.634	61452	59082	63180	63503
2014-10-12 22:45:20.640	61449	59067	63176	63541
2014-10-12 22:45:20.644	61461	59059	63179	63522
2014-10-12 22:45:20.650	61438	59073	63176	63495
2014-10-12 22:45:20.654	61434	59064	63158	63521
2014-10-12 22:45:20.660	61458	59064	63147	63541
2014-10-12 22:45:20.664	61438	59073	63139	63520
2014-10-12 22:45:20.670	61440	59065	63145	63497
2014-10-12 22:45:20.674	61444	59069	63143	63448
2014-10-12 22:45:20.680	61438	59070	63121	63405
2014-10-12 22:45:20.684	61450	59075	63105	63418
2014-10-12 22:45:20.690	61439	59069	63097	63417
2014-10-12 22:45:20.694	61442	59062	63107	63417
2014-10-12 22:45:20.700	61450	59079	63134	63446
2014-10-12 22:45:20.704	61445	59070	63136	63432
2014-10-12 22:45:20.710	61446	59069	63118	63409
2014-10-12 22:45:20.714	61446	59083	63112	63428
2014-10-12 22:45:20.720	61448	59065	63103	63445
2014-10-12 22:45:20.724	61437	59071	63090	63465
2014-10-12 22:45:20.730	61440	59074	63087	63497
2014-10-12 22:45:20.734	61443	59064	63092	63506
2014-10-12 22:45:20.740	61432	59081	63117	63508
2014-10-12 22:45:20.744	61439	59066	63133	63503
2014-10-12 22:45:20.750	61446	59067	63130	63498
2014-10-12 22:45:20.755	61449	59085	63138	63510
2014-10-12 22:45:20.759	61440	59058	63134	63522
2014-10-12 22:45:20.765	61441	59064	63127	63544
2014-10-12 22:45:20.769	61444	59066	63135	63523
2014-10-12 22:45:20.775	61439	59058	63138	63458
2014-10-12 22:45:20.779	61442	59082	63133	63449
2014-10-12 22:45:20.785	61430	59070	63138	63415
2014-10-12 22:45:20.789	61437	59062	63134	63380
2014-10-12 22:45:20.795	61451	59057	63124	63404
2014-10-12 22:45:20.799	61443	59058	63127	63399
2014-10-12 22:45:20.805	61447	59074	63116	63386
2014-10-12 22:45:20.809	61444	59051	63112	63375
2014-10-12 22:45:20.815	61436	59078	63131	63418
2014-10-12 22:45:20.819	61445	59095	63138	63489
2014-10-12 22:45:20.825	61432	59060	63141	63508
2014-10-12 22:45:20.829	61436	59076	63156	63525
2014-10-12 22:45:20.835	61464	59073	63174	63508
2014-10-12 22:45:20.839	61449	59074	63159	63482
2014-10-12 22:45:20.845	61435	59087	63136	63504
2014-10-12 22:45:20.849	61449	59065	63147	63515
2014-10-12 22:45:20.855	61448	59074	63150	63499
2014-10-12 22:45:20.859	61437	59069	63138	63501
2014-10-12 22:45:20.865	61428	59062	63126	63492
2014-10-12 22:45:20.869	61443	59083	63128	63472
2014-10-12 22:45:20.875	61453	59079	63121	63476
2014-10-12 22:45:20.880	61439	59074	63103	63447
2014-10-12 22:45:20.884	61446	59067	63111	63419
2014-10-12 22:45:20.890	61456	59067	63107	63415
2014-10-12 22:45:20.894	61441	59072	63087	63383
2014-10-12 22:45:20.900	61440	59066	63084	63372
2014-10-12 22:45:20.904	61448	59074	63100	63407
2014-10-12 22:45:20.910	61449	59068	63112	63437
2014-10-12 22:45:20.914	61440	59055	63111	63462
2014-10-12 22:45:20.920	61429	59059	63112	63506
2014-10-12 22:45:20.924	61432	59072	63111	63495
2014-10-12 22:45:20.930	61447	59065	63117	63460
2014-10-12 22:45:20.934	61442	59059	63119	63476
2014-10-12 22:45:20.940	61425	59080	63116	63487
2014-10-12 22:45:20.944	61438	59077	63118	63504
2014-10-12 22:45:20.950	61442	59066	63122	63545
2014-10-12 22:45:20.954	61430	59064	63138	63543
2014-10-12 22:45:20.960	61444	59062	63147	63498
2014-10-12 22:45:20.964	61440	59078	63164	63475
2014-10-12 22:45:20.970	61430	59070	63156	63472
2014-10-12 22:45:20.974	61448	59069	63122	63444
2014-10-12 22:45:20.980	61446	59076	63125	63426
2014-10-12 22:45:20.984	61440	59060	63133	63436
2014-10-12 22:45:20.990	61450	59073	63144	63426
2014-10-12 22:45:20.994	61441	59077	63145	63395
2014-10-12 22:45:21.000	61441	59053	63127	63390
2014-10-12 22:45:21.005	61451	59055	63113	63413
2014-10-12 22:45:21.009	61447	59059	63104	63441
2014-10-12 22:45:21.015	61443	59062	63120	63479
2014-10-12 22:45:21.019	61442	59074	63135	63495
2014-10-12 22:45:21.025	61437	59069	63139	63464
2014-10-12 22:45:21.029	61436	59068	63133	63455
2014-10-12 22:45:21.035	61449	59065	63129	63478
2014-10-12 22:45:21.039	61445	59051	63143	63486
2014-10-12 22:45:21.045	61428	59069	63151	63502
2014-10-12 22:45:21.049	61438	59070	63141	63507
2014-10-12 22:45:21.055	61445	59052	63128	63466
2014-10-12 22:45:21.059	61432	59066	63131	63442
2014-10-12 22:45:21.065	61431	59070	63129	63433
2014-10-12 22:45:21.069	61440	59076	63123	63440
2014-10-12 22:45:21.075	61439	59070	63128	63458
2014-10-12 22:45:21.079	61441	59057	63122	63428
2014-10-12 22:45:21.085	61444	59072	63106	63409
2014-10-12 22:45:21.089	61436	59070	63083	63409
2014-10-12 22:45:21.095	61430	59070	63081	63409
2014-10-12 22:45:21.099	61440	59058	63098	63447
2014-10-12 22:45:21.105	61454	59046	63112	63478
2014-10-12 22:45:21.109	61448	59069	63129	63489
2014-10-12 22:45:21.115	61440	59071	63129	63491
2014-10-12 22:45:21.119	61438	59060	63129	63492
2014-10-12 22:45:21.125	61432	59059	63127	63479
2014-10-12 22:45:21.130	61450	59055	63113	63478
2014-10-12 22:45:21.134	61453	59061	63110	63513
2014-10-12 22:45:21.140	61435	59069	63119	63503
2014-10-12 22:45:21.144	61438	59063	63142	63468
2014-10-12 22:45:21.150	61441	59068	63157	63432
2014-10-12 22:45:21.154	61440	59067	63160	63421
2014-10-12 22:45:21.160	61436	59061	63150	63457
2014-10-12 22:45:21.164	61436	59071	63139	63465
2014-10-12 22:45:21.170	61447	59067	63144	63462
2014-10-12 22:45:21.174	61433	59065	63136	63476
2014-10-12 22:45:21.180	61426	59069	63132	63477
2014-10-12 22:45:21.184	61441	59064	63130	63459
2014-10-12 22:45:21.190	61433	59066	63111	63430
2014-10-12 22:45:21.194	61435	59070	63101	63403
2014-10-12 22:45:21.200	61451	59065	63105	63391
2014-10-12 22:45:21.204	61445	59063	63109	63419
2014-10-12 22:45:21.210	61442	59071	63095	63462
2014-10-12 22:45:21.214	61441	59072	63084	63486
2014-10-12 22:45:21.220	61433	59069	63090	63496
2014-10-12 22:45:21.224	61431	59066	63098	63481
2014-10-12 22:45:21.230	61444	59070	63110	63448
2014-10-12 22:45:21.234	61442	59078	63116	63412
2014-10-12 22:45:21.240	61429	59076	63115	63438
2014-10-12 22:45:21.244	61447	59062	63114	63513
2014-10-12 22:45:21.250	61453	59063	63127	63539
2014-10-12 22:45:21.255	61443	59081	63160	63559
2014-10-12 22:45:21.259	61443	59071	63179	63582
2014-10-12 22:45:21.265	61443	59071	63167	63549
2014-10-12 22:45:21.269	61438	59078	63145	63499
2014-10-12 22:45:21.275	61435	59061	63151	63443
2014-10-12 22:45:21.279	61440	59062	63165	63385
2014-10-12 22:45:21.285	61440	59070	63131	63365
2014-10-12 22:45:21.289	61433	59066	63111	63382
2014-10-12 22:45:21.295	61441	59055	63112	63403
2014-10-12 22:45:21.299	61425	59064	63089	63426
2014-10-12 22:45:21.305	61419	59077	63093	63442
2014-10-12 22:45:21.309	61445	59062	63109	63447
2014-10-12 22:45:21.315	61440	59058	63118	63419
2014-10-12 22:45:21.319	61438	59068	63116	63416
2014-10-12 22:45:21.325	61442	59063	63111	63475
2014-10-12 22:45:21.329	61427	59062	63138	63499
2014-10-12 22:45:21.335	61442	59060	63136	63515
2014-10-12 22:45:21.339	61440	59047	63115	63534
2014-10-12 22:45:21.345	61432	59063	63125	63517
2014-10-12 22:45:21.349	61441	59079	63119	63481
2014-10-12 22:45:21.355	61433	59073	63117	63432
2014-10-12 22:45:21.359	61444	59071	63137	63418
2014-10-12 22:45:21.365	61447	59056	63151	63441
2014-10-12 22:45:21.369	61432	59052	63159	63471
2014-10-12 22:45:21.375	61446	59073	63127	63483
2014-10-12 22:45:21.380	61445	59069	63109	63466
2014-10-12 22:45:21.384	61434	59057	63142	63455
2014-10-12 22:45:21.390	61443	59058	63146	63447
2014-10-12 22:45:21.394	61446	59064	63145	63436
2014-10-12 22:45:21.400	61436	59074	63156	63435
2014-10-12 22:45:21.404	61426	59062	63133	63422
2014-10-12 22:45:21.410	61439	59062	63103	63418
2014-10-12 22:45:21.414	61444	59078	63095	63454
2014-10-12 22:45:21.420	61430	59064	63113	63474
2014-10-12 22:45:21.424	61435	59067	63132	63468
2014-10-12 22:45:21.430	61433	59072	63115	63467
2014-10-12 22:45:21.434	61437	59063	63109	63469
2014-10-12 22:45:21.440	61440	59062	63125	63449
2014-10-12 22:45:21.444	61428	59058	63108	63417
2014-10-12 22:45:21.450	61425	59063	63114	63406
2014-10-12 22:45:21.454	61432	59057	63134	63406
2014-10-12 22:45:21.460	61440	59050	63124	63437
2014-10-12 22:45:21.464	61436	59068	63118	63488
2014-10-12 22:45:21.470	61436	59063	63099	63517
2014-10-12 22:45:21.474	61436	59056	63090	63513
2014-10-12 22:45:21.480	61437	59059	63115	63483
2014-10-12 22:45:21.484	61445	59047	63123	63465
2014-10-12 22:45:21.490	61435	59049	63113	63467
2014-10-12 22:45:21.494	61423	59064	63117	63474
2014-10-12 22:45:21.500	61433	59062	63112	63455
2014-10-12 22:45:21.505	61441	59063	63082	63435
2014-10-12 22:45:21.509	61434	59065	63083	63425
2014-10-12 22:45:21.515	61434	59049	63105	63405
2014-10-12 22:45:21.519	61431	59060	63112	63418
2014-10-12 22:45:21.525	61433	59072	63118	63451
2014-10-12 22:45:21.529	61439	59053	63118	63491
2014-10-12 22:45:21.535	61429	59050	63134	63495
2014-10-12 22:45:21.539	61432	59063	63161	63483
2014-10-12 22:45:21.545	61435	59049	63156	63504
2014-10-12 22:45:21.549	61437	59046	63143	63480
2014-10-12 22:45:21.555	61444	59068	63136	63442
2014-10-12 22:45:21.559	61430	59070	63132	63428
2014-10-12 22:45:21.565	61428	59062	63143	63425
2014-10-12 22:45:21.569	61429	59055	63136	63429
2014-10-12 22:45:21.575	61433	59064	63133	63411
2014-10-12 22:45:21.579	61442	59067	63136	63436
2014-10-12 22:45:21.585	61431	59055	63123	63468
2014-10-12 22:45:21.589	61433	59071	63118	63461
2014-10-12 22:45:21.595	61437	59065	63098	63472
2014-10-12 22:45:21.599	61436	59060	63097	63468
2014-10-12 22:45:21.605	61432	59076	63103	63465
2014-10-12 22:45:21.609	61430	59050	63093	63471
2014-10-12 22:45:21.615	61436	59049	63111	63467
2014-10-12 22:45:21.619	61428	59074	63114	63471
2014-10-12 22:45:21.625	61434	59064	63104	63453
2014-10-12 22:45:21.630	61434	59054	63095	63426
2014-10-12 22:45:21.634	61428	59075	63081	63419
2014-10-12 22:45:21.640	61434	59069	63098	63439
2014-10-12 22:45:21.644	61435	59052	63117	63484
2014-10-12 22:45:21.650	61430	59074	63129	63498
2014-10-12 22:45:21.654	61428	59065	63159	63486
2014-10-12 22:45:21.660	61443	59050	63172	63462
2014-10-12 22:45:21.664	61439	59067	63152	63413
2014-10-12 22:45:21.670	61434	59067	63140	63372
2014-10-12 22:45:21.674	61453	59062	63145	63374
2014-10-12 22:45:21.680	61446	59061	63150	63401
2014-10-12 22:45:21.684	61432	59061	63131	63429
2014-10-12 22:45:21.690	61442	59056	63109	63435
2014-10-12 22:45:21.694	61434	59060	63108	63441
2014-10-12 22:45:21.700	61420	59058	63072	63469
2014-10-12 22:45:21.704	61438	59050	63060	63484
2014-10-12 22:45:21.710	61435	59067	63092	63508
2014-10-12 22:45:21.714	61424	59072	63087	63503
2014-10-12 22:45:21.720	61427	59056	63085	63478
2014-10-12 22:45:21.724	61431	59057	63083	63494
2014-10-12 22:45:21.730	61435	59067	63080	63503
2014-10-12 22:45:21.734	61428	59058	63087	63510
2014-10-12 22:45:21.740	61428	59050	63091	63488
2014-10-12 22:45:21.744	61432	59062	63111	63473
2014-10-12 22:45:21.750	61420	59062	63115	63485
2014-10-12 22:45:21.755	61427	59062	63102	63435
2014-10-12 22:45:21.759	61432	59071	63114	63395
2014-10-12 22:45:21.765	61422	59063	63137	63377
2014-10-12 22:45:21.769	61436	59056	63132	63371
2014-10-12 22:45:21.775	61431	59065	63131	63411
2014-10-12 22:45:21.779	61420	59061	63155	63427
2014-10-12 22:45:21.785	61432	59060	63165	63452
2014-10-12 22:45:21.789	61423	59072	63159	63470
2014-10-12 22:45:21.795	61426	59061	63158	63450
2014-10-12 22:45:21.799	61432	59064	63153	63467
2014-10-12 22:45:21.805	61428	59063	63138	63491
2014-10-12 22:45:21.809	61427	59053	63125	63485
2014-10-12 22:45:21.815	61414	59061	63112	63480
2014-10-12 22:45:21.819	61423	59051	63104	63469
2014-10-12 22:45:21.825	61436	59070	63096	63453
2014-10-12 22:45:21.829	61433	59072	63090	63450
2014-10-12 22:45:21.835	61432	59041	63108	63445
2014-10-12 22:45:21.839	61426	59059	63109	63433
2014-10-12 22:45:21.845	61424	59058	63095	63422
2014-10-12 22:45:21.849	61432	59050	63089	63415
2014-10-12 22:45:21.855	61437	59063	63082	63426
2014-10-12 22:45:21.859	61417	59053	63089	63455
2014-10-12 22:45:21.865	61421	59060	63098	63496
2014-10-12 22:45:21.869	61430	59075	63121	63502
2014-10-12 22:45:21.875	61434	59052	63122	63483
2014-10-12 22:45:21.880	61444	59050	63106	63473
2014-10-12 22:45:21.884	61432	59072	63125	63479
2014-10-12 22:45:21.890	61431	59067	63119	63509
2014-10-12 22:45:21.894	61441	59055	63109	63509
2014-10-12 22:45:21.900	61438	59055	63131	63484
2014-10-12 22:45:21.904	61429	59061	63133	63441
2014-10-12 22:45:21.910	61433	59060	63123	63411
2014-10-12 22:45:21.914	61439	59064	63110	63407
2014-10-12 22:45:21.920	61433	59069	63102	63387
2014-10-12 22:45:21.924	61437	59053	63110	63401
2014-10-12 22:45:21.930	61447	59060	63108	63423
2014-10-12 22:45:21.934	61436	59061	63107	63437
2014-10-12 22:45:21.940	61426	59061	63108	63433
2014-10-12 22:45:21.944	61437	59071	63108	63391
2014-10-12 22:45:21.950	61433	59057	63126	63399
2014-10-12 22:45:21.954	61428	59072	63130	63457
2014-10-12 22:45:21.960	61437	59068	63129	63505
2014-10-12 22:45:21.964	61427	59049	63125	63522
2014-10-12 22:45:21.970	61421	59072	63127	63524
2014-10-12 22:45:21.974	61431	59071	63138	63484
2014-10-12 22:45:21.980	61434	59057	63131	63440
2014-10-12 22:45:21.984	61428	59065	63125	63459
2014-10-12 22:45:21.990	61425	59075	63102	63463
2014-10-12 22:45:21.994	61435	59074	63119	63468
2014-10-12 22:45:22.000	61430	59078	63156	63502
2014-10-12 22:45:22.005	61426	59077	63127	63486
2014-10-12 22:45:22.009	61435	59064	63125	63457
2014-10-12 22:45:22.015	61433	59069	63127	63448
2014-10-12 22:45:22.019	61423	59063	63106	63440
2014-10-12 22:45:22.025	61433	59060	63124	63451
2014-10-12 22:45:22.029	61441	59067	63137	63477
2014-10-12 22:45:22.035	61431	59061	63142	63471
2014-10-12 22:45:22.039	61445	59063	63139	63465
2014-10-12 22:45:22.045	61437	59065	63119	63453
2014-10-12 22:45:22.049	61422	59063	63139	63410
2014-10-12 22:45:22.055	61436	59066	63158	63418
2014-10-12 22:45:22.059	61429	59073	63135	63454
2014-10-12 22:45:22.065	61441	59061	63131	63477
2014-10-12 22:45:22.069	61445	59063	63137	63473
2014-10-12 22:45:22.075	61430	59080	63127	63449
2014-10-12 22:45:22.079	61445	59061	63113	63459
2014-10-12 22:45:22.085	61436	59053	63104	63462
2014-10-12 22:45:22.089	61432	59063	63117	63466
2014-10-12 22:45:22.095	61443	59070	63138	63488
2014-10-12 22:45:22.099	61432	59070	63140	63475
2014-10-12 22:45:22.105	61438	59067	63105	63456
2014-10-12 22:45:22.109	61428	59062	63078	63448
2014-10-12 22:45:22.115	61423	59060	63083	63431
2014-10-12 22:45:22.119	61448	59074	63086	63442
2014-10-12 22:45:22.125	61444	59066	63098	63448
2014-10-12 22:45:22.130	61441	59063	63096	63444
2014-10-12 22:45:22.134	61438	59066	63070	63470
2014-10-12 22:45:22.140	61435	59054	63075	63478
2014-10-12 22:45:22.144	61444	59067	63102	63489
2014-10-12 22:45:22.150	61438	59067	63110	63498
2014-10-12 22:45:22.154	61440	59062	63118	63516
2014-10-12 22:45:22.160	61444	59079	63145	63534
2014-10-12 22:45:22.164	61439	59066	63149	63513
2014-10-12 22:45:22.170	61444	59051	63146	63482
2014-10-12 22:45:22.174	61435	59063	63169	63442
2014-10-12 22:45:22.180	61433	59066	63177	63444
2014-10-12 22:45:22.184	61453	59053	63165	63449
2014-10-12 22:45:22.190	61445	59058	63166	63448
2014-10-12 22:45:22.194	61434	59065	63170	63445
2014-10-12 22:45:22.200	61434	59059	63143	63388
2014-10-12 22:45:22.204	61440	59075	63115	63394
2014-10-12 22:45:22.210	61455	59066	63119	63402
2014-10-12 22:45:22.214	61443	59044	63118	63397
2014-10-12 22:45:22.220	61437	59068	63113	63435
2014-10-12 22:45:22.224	61435	59064	63114	63444
2014-10-12 22:45:22.230	61430	59042	63113	63476
2014-10-12 22:45:22.234	61441	59066	63129	63513
2014-10-12 22:45:22.240	61431	59072	63130	63540
2014-10-12 22:45:22.244	61434	59061	63113	63542
2014-10-12 22:45:22.250	61451	59062	63126	63514
2014-10-12 22:45:22.255	61451	59066	63136	63514
2014-10-12 22:45:22.259	61451	59062	63135	63505
2014-10-12 22:45:22.265	61450	59052	63132	63502
2014-10-12 22:45:22.269	61447	59056	63115	63501
2014-10-12 22:45:22.275	61444	59069	63141	63473
2014-10-12 22:45:22.279	61450	59074	63181	63438
2014-10-12 22:45:22.285	61450	59075	63156	63425
2014-10-12 22:45:22.289	61451	59079	63136	63448
2014-10-12 22:45:22.295	61456	59062	63140	63446
2014-10-12 22:45:22.299	61441	59061	63146	63416
2014-10-12 22:45:22.305	61442	59075	63166	63407
2014-10-12 22:45:22.309	61454	59072	63165	63435
2014-10-12 22:45:22.315	61452	59064	63154	63455
2014-10-12 22:45:22.319	61450	59057	63154	63455
2014-10-12 22:45:22.325	61455	59068	63144	63475
2014-10-12 22:45:22.329	61463	59071	63126	63467
2014-10-12 22:45:22.335	61461	59066	63131	63487
2014-10-12 22:45:22.339	61454	59074	63132	63525
2014-10-12 22:45:22.345	61452	59067	63123	63504
2014-10-12 22:45:22.349	61453	59076	63131	63494
2014-10-12 22:45:22.355	61451	59074	63131	63479
2014-10-12 22:45:22.359	61454	59066	63135	63484
2014-10-12 22:45:22.365	61447	59068	63137	63493
2014-10-12 22:45:22.369	61443	59067	63128	63477
2014-10-12 22:45:22.375	61457	59076	63136	63493
2014-10-12 22:45:22.380	61441	59062	63137	63484
2014-10-12 22:45:22.384	61436	59056	63140	63469
2014-10-12 22:45:22.390	61452	59070	63152	63436
2014-10-12 22:45:22.394	61440	59065	63162	63413
2014-10-12 22:45:22.400	61442	59071	63163	63446
2014-10-12 22:45:22.404	61446	59076	63156	63442
2014-10-12 22:45:22.410	61447	59072	63169	63473
2014-10-12 22:45:22.414	61453	59076	63168	63485
2014-10-12 22:45:22.420	61446	59072	63169	63461
2014-10-12 22:45:22.424	61454	59068	63177	63497
2014-10-12 22:45:22.430	61448	59079	63176	63501
2014-10-12 22:45:22.434	61452	59072	63179	63504
2014-10-12 22:45:22.440	61468	59054	63160	63517
2014-10-12 22:45:22.444	61453	59070	63154	63504
2014-10-12 22:45:22.450	61461	59079	63146	63498
2014-10-12 22:45:22.454	61465	59068	63139	63494
2014-10-12 22:45:22.460	61451	59063	63149	63490
2014-10-12 22:45:22.464	61461	59059	63132	63451
2014-10-12 22:45:22.470	61465	59071	63133	63414
2014-10-12 22:45:22.474	61468	59075	63125	63422
2014-10-12 22:45:22.480	61467	59065	63120	63419
2014-10-12 22:45:22.484	61456	59084	63135	63432
2014-10-12 22:45:22.490	61447	59085	63126	63475
2014-10-12 22:45:22.494	61453	59060	63129	63493
2014-10-12 22:45:22.500	61464	59075	63133	63488
2014-10-12 22:45:22.505	61455	59081	63155	63504
2014-10-12 22:45:22.509	61457	59062	63164	63528
2014-10-12 22:45:22.515	61462	59068	63148	63527
2014-10-12 22:45:22.519	61444	59086	63148	63518
2014-10-12 22:45:22.525	61451	59078	63133	63515
2014-10-12 22:45:22.529	61472	59064	63126	63495
2014-10-12 22:45:22.535	61467	59079	63134	63488
2014-10-12 22:45:22.539	61462	59084	63153	63526
2014-10-12 22:45:22.545	61455	59077	63159	63535
2014-10-12 22:45:22.549	61459	59082	63155	63504
2014-10-12 22:45:22.555	61473	59070	63181	63475
2014-10-12 22:45:22.559	61467	59075	63187	63437
2014-10-12 22:45:22.565	61469	59088	63196	63429
2014-10-12 22:45:22.569	61476	59064	63201	63435
2014-10-12 22:45:22.575	61455	59075	63179	63431
2014-10-12 22:45:22.579	61452	59087	63175	63429
2014-10-12 22:45:22.585	61458	59059	63166	63430
2014-10-12 22:45:22.589	61451	59065	63167	63477
2014-10-12 22:45:22.595	61456	59084	63170	63490
2014-10-12 22:45:22.599	61467	59091	63152	63494
2014-10-12 22:45:22.605	61471	59088	63142	63537
2014-10-12 22:45:22.609	61465	59080	63136	63550
2014-10-12 22:45:22.615	61463	59083	63131	63576
2014-10-12 22:45:22.619	61463	59074	63114	63572
2014-10-12 22:45:22.625	61467	59072	63107	63543
2014-10-12 22:45:22.630	61465	59068	63132	63522
2014-10-12 22:45:22.634	61465	59082	63132	63487
2014-10-12 22:45:22.640	61474	59096	63128	63498
2014-10-12 22:45:22.644	61468	59070	63155	63506
2014-10-12 22:45:22.650	61470	59085	63169	63495
2014-10-12 22:45:22.654	61477	59093	63166	63446
2014-10-12 22:45:22.660	61466	59069	63170	63384
2014-10-12 22:45:22.664	61466	59085	63175	63410
2014-10-12 22:45:22.670	61469	59099	63175	63422
2014-10-12 22:45:22.674	61469	59091	63177	63424
2014-10-12 22:45:22.680	61474	59086	63188	63449
2014-10-12 22:45:22.684	61475	59091	63200	63432
2014-10-12 22:45:22.690	61466	59077	63189	63451
2014-10-12 22:45:22.694	61475	59078	63183	63484
2014-10-12 22:45:22.700	61482	59100	63192	63496
2014-10-12 22:45:22.704	61479	59080	63180	63527
2014-10-12 22:45:22.710	61479	59084	63174	63568
2014-10-12 22:45:22.714	61466	59096	63176	63595
2014-10-12 22:45:22.720	61460	59082	63184	63579
2014-10-12 22:45:22.724	61476	59099	63199	63582
2014-10-12 22:45:22.730	61481	59095	63176	63602
2014-10-12 22:45:22.734	61467	59080	63168	63584
2014-10-12 22:45:22.740	61470	59086	63178	63547
2014-10-12 22:45:22.744	61479	59081	63154	63501
2014-10-12 22:45:22.750	61467	59098	63160	63453
2014-10-12 22:45:22.755	61474	59100	63166	63400
2014-10-12 22:45:22.759	61470	59086	63135	63382
2014-10-12 22:45:22.765	61464	59096	63142	63391
2014-10-12 22:45:22.769	61484	59090	63161	63397
2014-10-12 22:45:22.775	61483	59092	63169	63438
2014-10-12 22:45:22.779	61467	59096	63169	63436
2014-10-12 22:45:22.785	61468	59093	63151	63430
2014-10-12 22:45:22.789	61478	59097	63150	63477
2014-10-12 22:45:22.795	61484	59088	63154	63501
2014-10-12 22:45:22.799	61472	59094	63160	63526
2014-10-12 22:45:22.805	61470	59102	63183	63519
2014-10-12 22:45:22.809	61482	59094	63190	63539
2014-10-12 22:45:22.815	61474	59088	63178	63580
2014-10-12 22:45:22.819	61471	59088	63183	63562
2014-10-12 22:45:22.825	61480	59090	63193	63585
2014-10-12 22:45:22.829	61482	59088	63187	63602
2014-10-12 22:45:22.835	61484	59091	63196	63593
2014-10-12 22:45:22.839	61474	59087	63190	63575
2014-10-12 22:45:22.845	61476	59103	63177	63528
2014-10-12 22:45:22.849	61489	59110	63180	63516
2014-10-12 22:45:22.855	61469	59092	63170	63494
2014-10-12 22:45:22.859	61479	59108	63166	63455
2014-10-12 22:45:22.865	61500	59098	63154	63423
2014-10-12 22:45:22.869	61472	59088	63138	63390
2014-10-12 22:45:22.875	61465	59107	63148	63386
2014-10-12 22:45:22.880	61479	59096	63160	63402
2014-10-12 22:45:22.884	61479	59094	63175	63412
2014-10-12 22:45:22.890	61470	59106	63186	63431
2014-10-12 22:45:22.894	61480	59105	63165	63456
2014-10-12 22:45:22.900	61505	59106	63135	63464
2014-10-12 22:45:22.904	61492	59108	63131	63475
2014-10-12 22:45:22.910	61485	59096	63155	63523
2014-10-12 22:45:22.914	61491	59089	63173	63574
2014-10-12 22:45:22.920	61481	59108	63174	63600
2014-10-12 22:45:22.924	61487	59114	63158	63623
2014-10-12 22:45:22.930	61482	59102	63147	63612
2014-10-12 22:45:22.934	61477	59095	63166	63577
2014-10-12 22:45:22.940	61485	59109	63180	63545
2014-10-12 22:45:22.944	61476	59110	63178	63488
2014-10-12 22:45:22.950	61472	59098	63178	63458
2014-10-12 22:45:22.954	61481	59114	63182	63479
2014-10-12 22:45:22.960	61491	59121	63192	63483
2014-10-12 22:45:22.964	61488	59102	63198	63466
2014-10-12 22:45:22.970	61479	59103	63208	63457
2014-10-12 22:45:22.974	61485	59115	63219	63433
2014-10-12 22:45:22.980	61487	59109	63210	63410
2014-10-12 22:45:22.984	61480	59108	63209	63414
2014-10-12 22:45:22.990	61484	59110	63199	63458
2014-10-12 22:45:22.994	61491	59107	63174	63536
2014-10-12 22:45:23.000	61490	59118	63176	63583
2014-10-12 22:45:23.005	61487	59106	63166	63590
2014-10-12 22:45:23.009	61492	59105	63141	63563
2014-10-12 22:45:23.015	61499	59125	63137	63535
2014-10-12 22:45:23.019	61482	59116	63135	63566
2014-10-12 22:45:23.025	61472	59113	63147	63581
2014-10-12 22:45:23.029	61482	59122	63184	63555
2014-10-12 22:45:23.035	61488	59121	63184	63534
2014-10-12 22:45:23.039	61484	59113	63178	63501
2014-10-12 22:45:23.045	61478	59112	63196	63452
2014-10-12 22:45:23.049	61488	59117	63171	63417
2014-10-12 22:45:23.055	61493	59118	63153	63407
2014-10-12 22:45:23.059	61490	59115	63159	63419
2014-10-12 22:45:23.065	61489	59117	63143	63466
2014-10-12 22:45:23.069	61484	59119	63144	63508
2014-10-12 22:45:23.075	61486	59106	63156	63499
2014-10-12 22:45:23.079	61486	59114	63165	63482
2014-10-12 22:45:23.085	61475	59121	63178	63496
2014-10-12 22:45:23.089	61488	59114	63185	63519
2014-10-12 22:45:23.095	61503	59121	63181	63533
2014-10-12 22:45:23.099	61481	59115	63195	63536
2014-10-12 22:45:23.105	61471	59111	63194	63552
2014-10-12 22:45:23.109	61484	59118	63192	63572
2014-10-12 22:45:23.115	61478	59114	63202	63541
2014-10-12 22:45:23.119	61483	59114	63187	63515
2014-10-12 22:45:23.125	61493	59124	63194	63520
2014-10-12 22:45:23.130	61480	59119	63190	63495
2014-10-12 22:45:23.134	61483	59120	63176	63483
2014-10-12 22:45:23.140	61487	59122	63188	63463
2014-10-12 22:45:23.144	61485	59101	63181	63434
2014-10-12 22:45:23.150	61495	59121	63182	63448
2014-10-12 22:45:23.154	61492	59129	63187	63476
2014-10-12 22:45:23.160	61488	59109	63175	63520
2014-10-12 22:45:23.164	61482	59133	63179	63549
2014-10-12 22:45:23.170	61483	59136	63188	63530
2014-10-12 22:45:23.174	61499	59111	63191	63500
2014-10-12 22:45:23.180	61490	59112	63181	63451
2014-10-12 22:45:23.184	61485	59119	63170	63437
2014-10-12 22:45:23.190	61495	59113	63177	63470
2014-10-12 22:45:23.194	61487	59109	63183	63498
2014-10-12 22:45:23.200	61491	59120	63181	63532
2014-10-12 22:45:23.204	61489	59124	63178	63557
2014-10-12 22:45:23.210	61484	59123	63159	63565
2014-10-12 22:45:23.214	61506	59123	63155	63555
2014-10-12 22:45:23.220	61494	59114	63172	63541
2014-10-12 22:45:23.224	61479	59116	63179	63567
2014-10-12 22:45:23.230	61503	59126	63188	63576
2014-10-12 22:45:23.234	61495	59120	63201	63562
2014-10-12 22:45:23.240	61490	59113	63199	63558
2014-10-12 22:45:23.244	61493	59120	63221	63540
2014-10-12 22:45:23.250	61484	59129	63233	63526
2014-10-12 22:45:23.255	61498	59130	63213	63490
2014-10-12 22:45:23.259	61488	59127	63198	63444
2014-10-12 22:45:23.265	61491	59126	63180	63458
2014-10-12 22:45:23.269	61503	59119	63181	63469
2014-10-12 22:45:23.275	61488	59113	63184	63459
2014-10-12 22:45:23.279	61489	59118	63154	63488
2014-10-12 22:45:23.285	61487	59123	63133	63501
2014-10-12 22:45:23.289	61488	59129	63149	63507
2014-10-12 22:45:23.295	61492	59121	63169	63534
2014-10-12 22:45:23.299	61498	59117	63184	63507
2014-10-12 22:45:23.305	61492	59140	63200	63477
2014-10-12 22:45:23.309	61486	59128	63202	63487
2014-10-12 22:45:23.315	61498	59102	63202	63506
2014-10-12 22:45:23.319	61486	59118	63188	63523
2014-10-12 22:45:23.325	61491	59126	63192	63540
2014-10-12 22:45:23.329	61501	59127	63207	63550
2014-10-12 22:45:23.335	61495	59126	63179	63517
2014-10-12 22:45:23.339	61503	59118	63169	63491
2014-10-12 22:45:23.345	61498	59122	63171	63509
2014-10-12 22:45:23.349	61483	59125	63169	63536
2014-10-12 22:45:23.355	61482	59129	63185	63583
2014-10-12 22:45:23.359	61489	59133	63187	63604
2014-10-12 22:45:23.365	61494	59123	63182	63571
2014-10-12 22:45:23.369	61502	59123	63200	63552
2014-10-12 22:45:23.375	61500	59129	63217	63520
2014-10-12 22:45:23.380	61506	59129	63213	63474
2014-10-12 22:45:23.384	61515	59124	63215	63453
2014-10-12 22:45:23.390	61492	59129	63215	63464
2014-10-12 22:45:23.394	61485	59127	63212	63487
2014-10-12 22:45:23.400	61487	59108	63198	63482
2014-10-12 22:45:23.404	61480	59131	63155	63498
2014-10-12 22:45:23.410	61500	59151	63148	63512
2014-10-12 22:45:23.414	61506	59117	63174	63502
2014-10-12 22:45:23.420	61497	59123	63202	63510
2014-10-12 22:45:23.424	61496	59145	63215	63501
2014-10-12 22:45:23.430	61499	59124	63203	63488
2014-10-12 22:45:23.434	61509	59114	63196	63491
2014-10-12 22:45:23.440	61508	59125	63193	63516
2014-10-12 22:45:23.444	61499	59130	63202	63526
2014-10-12 22:45:23.450	61506	59120	63191	63529
2014-10-12 22:45:23.454	61500	59115	63172	63560
2014-10-12 22:45:23.460	61494	59120	63167	63580
2014-10-12 22:45:23.464	61501	59110	63160	63588
2014-10-12 22:45:23.470	61492	59116	63173	63563
2014-10-12 22:45:23.474	61500	59127	63176	63546
2014-10-12 22:45:23.480	61512	59118	63176	63566
2014-10-12 22:45:23.484	61494	59141	63175	63556
2014-10-12 22:45:23.490	61494	59132	63179	63514
2014-10-12 22:45:23.494	61505	59110	63193	63475
2014-10-12 22:45:23.500	61506	59140	63193	63474
2014-10-12 22:45:23.505	61506	59135	63211	63459
2014-10-12 22:45:23.509	61504	59126	63226	63435
2014-10-12 22:45:23.515	61502	59136	63220	63449
2014-10-12 22:45:23.519	61501	59128	63224	63461
2014-10-12 22:45:23.525	61497	59131	63228	63480
2014-10-12 22:45:23.529	61504	59128	63228	63520
2014-10-12 22:45:23.535	61517	59130	63229	63561
2014-10-12 22:45:23.539	61506	59133	63223	63560
2014-10-12 22:45:23.545	61495	59123	63199	63540
2014-10-12 22:45:23.549	61507	59122	63198	63536
2014-10-12 22:45:23.555	61509	59116	63206	63550
2014-10-12 22:45:23.559	61502	59118	63184	63584
2014-10-12 22:45:23.565	61502	59141	63177	63575
2014-10-12 22:45:23.569	61501	59138	63185	63551
2014-10-12 22:45:23.575	61508	59125	63184	63535
2014-10-12 22:45:23.579	61517	59138	63184	63518
2014-10-12 22:45:23.585	61504	59124	63177	63522
2014-10-12 22:45:23.589	61500	59111	63164	63520
2014-10-12 22:45:23.595	61511	59119	63182	63554
2014-10-12 22:45:23.599	61510	59118	63195	63568
2014-10-12 22:45:23.605	61505	59123	63207	63534
2014-10-12 22:45:23.609	61502	59120	63222	63502
2014-10-12 22:45:23.615	61498	59128	63215	63463
2014-10-12 22:45:23.619	61502	59129	63215	63435
2014-10-12 22:45:23.625	61509	59119	63204	63444
2014-10-12 22:45:23.630	61500	59128	63209	63510
2014-10-12 22:45:23.634	61502	59125	63225	63561
2014-10-12 22:45:23.640	61511	59122	63219	63571
2014-10-12 22:45:23.644	61497	59122	63222	63558
2014-10-12 22:45:23.650	61498	59116	63229	63506
2014-10-12 22:45:23.654	61504	59122	63231	63484
2014-10-12 22:45:23.660	61504	59131	63215	63486
2014-10-12 22:45:23.664	61507	59124	63211	63488
2014-10-12 22:45:23.670	61514	59113	63210	63500
2014-10-12 22:45:23.674	61520	59122	63195	63517
2014-10-12 22:45:23.680	61502	59125	63195	63556
2014-10-12 22:45:23.684	61498	59124	63183	63566
2014-10-12 22:45:23.690	61520	59130	63189	63551
2014-10-12 22:45:23.694	61514	59122	63209	63542
2014-10-12 22:45:23.700	61503	59122	63205	63540
2014-10-12 22:45:23.704	61516	59128	63196	63551
2014-10-12 22:45:23.710	61518	59117	63191	63536
2014-10-12 22:45:23.714	61512	59115	63202	63511
2014-10-12 22:45:23.720	61520	59113	63198	63502
2014-10-12 22:45:23.724	61514	59116	63186	63475
2014-10-12 22:45:23.730	61508	59119	63201	63447
2014-10-12 22:45:23.734	61515	59118	63203	63479
2014-10-12 22:45:23.740	61512	59135	63186	63530
2014-10-12 22:45:23.744	61510	59122	63169	63561
2014-10-12 22:45:23.750	61517	59113	63175	63582
2014-10-12 22:45:23.755	61518	59119	63189	63560
2014-10-12 22:45:23.759	61523	59112	63191	63532
2014-10-12 22:45:23.765	61518	59120	63190	63510
2014-10-12 22:45:23.769	61506	59107	63184	63496
2014-10-12 22:45:23.775	61516	59115	63195	63519
2014-10-12 22:45:23.779	61518	59125	63212	63531
2014-10-12 22:45:23.785	61515	59102	63212	63549
2014-10-12 22:45:23.789	61516	59115	63227	63562
2014-10-12 22:45:23.795	61508	59119	63255	63515
2014-10-12 22:45:23.799	61509	59108	63255	63471
2014-10-12 22:45:23.805	61510	59114	63231	63484
2014-10-12 22:45:23.809	61501	59120	63213	63521
2014-10-12 22:45:23.815	61506	59132	63223	63513
2014-10-12 22:45:23.819	61515	59124	63226	63501
2014-10-12 22:45:23.825	61507	59110	63204	63512
2014-10-12 22:45:23.829	61511	59109	63193	63501
2014-10-12 22:45:23.835	61519	59114	63190	63527
2014-10-12 22:45:23.839	61500	59119	63189	63577
2014-10-12 22:45:23.845	61510	59106	63198	63610
2014-10-12 22:45:23.849	61518	59111	63197	63615
2014-10-12 22:45:23.855	61498	59113	63176	63577
2014-10-12 22:45:23.859	61510	59115	63175	63558
2014-10-12 22:45:23.865	61518	59122	63192	63522
2014-10-12 22:45:23.869	61512	59101	63187	63464
2014-10-12 22:45:23.875	61516	59112	63195	63449
2014-10-12 22:45:23.880	61515	59109	63210	63437
2014-10-12 22:45:23.884	61508	59105	63213	63450
2014-10-12 22:45:23.890	61501	59127	63238	63480
2014-10-12 22:45:23.894	61503	59115	63245	63489
2014-10-12 22:45:23.900	61511	59116	63243	63491
2014-10-12 22:45:23.904	61514	59122	63245	63500
2014-10-12 22:45:23.910	61512	59103	63227	63548
2014-10-12 22:45:23.914	61510	59109	63231	63587
2014-10-12 22:45:23.920	61500	59120	63233	63591
2014-10-12 22:45:23.924	61498	59110	63220	63591
2014-10-12 22:45:23.930	61517	59103	63216	63558
2014-10-12 22:45:23.934	61520	59113	63212	63545
2014-10-12 22:45:23.940	61509	59103	63211	63554
2014-10-12 22:45:23.944	61521	59095	63198	63541
2014-10-12 22:45:23.950	61523	59113	63182	63541
2014-10-12 22:45:23.954	61505	59106	63177	63524
2014-10-12 22:45:23.960	61507	59100	63186	63496
2014-10-12 22:45:23.964	61501	59111	63198	63483
2014-10-12 22:45:23.970	61509	59103	63189	63459
2014-10-12 22:45:23.974	61517	59092	63176	63454
2014-10-12 22:45:23.980	61499	59104	63188	63480
2014-10-12 22:45:23.984	61500	59117	63198	63498
2014-10-12 22:45:23.990	61501	59102	63190	63514
2014-10-12 22:45:23.994	61511	59101	63192	63525
2014-10-12 22:45:24.000	61520	59103	63185	63520
2014-10-12 22:45:24.005	61506	59095	63184	63537
2014-10-12 22:45:24.009	61499	59097	63185	63567
2014-10-12 22:45:24.015	61503	59098	63179	63559
2014-10-12 22:45:24.019	61516	59108	63179	63548
2014-10-12 22:45:24.025	61503	59114	63168	63545
2014-10-12 22:45:24.029	61495	59107	63184	63518
2014-10-12 22:45:24.035	61512	59107	63200	63492
2014-10-12 22:45:24.039	61506	59108	63198	63477
2014-10-12 22:45:24.045	61498	59107	63204	63488
2014-10-12 22:45:24.049	61502	59108	63204	63499
2014-10-12 22:45:24.055	61496	59105	63221	63502
2014-10-12 22:45:24.059	61498	59097	63223	63518
2014-10-12 22:45:24.065	61498	59100	63205	63501
2014-10-12 22:45:24.069	61496	59105	63217	63493
2014-10-12 22:45:24.075	61505	59108	63208	63482
2014-10-12 22:45:24.079	61499	59096	63196	63464
2014-10-12 22:45:24.085	61504	59098	63213	63503
2014-10-12 22:45:24.089	61499	59106	63222	63540
2014-10-12 22:45:24.095	61485	59090	63213	63587
2014-10-12 22:45:24.099	61507	59090	63197	63602
2014-10-12 22:45:24.105	61506	59103	63189	63552
2014-10-12 22:45:24.109	61492	59104	63187	63532
2014-10-12 22:45:24.115	61500	59090	63197	63538
2014-10-12 22:45:24.119	61498	59087	63207	63562
2014-10-12 22:45:24.125	61497	59100	63190	63554
2014-10-12 22:45:24.130	61497	59096	63187	63539
2014-10-12 22:45:24.134	61489	59100	63205	63516
2014-10-12 22:45:24.140	61494	59097	63205	63457
2014-10-12 22:45:24.144	61505	59085	63204	63426
2014-10-12 22:45:24.150	61501	59099	63198	63399
2014-10-12 22:45:24.154	61481	59094	63164	63417
2014-10-12 22:45:24.160	61487	59092	63171	63438
2014-10-12 22:45:24.164	61499	59095	63190	63437
2014-10-12 22:45:24.170	61495	59083	63165	63476
2014-10-12 22:45:24.174	61499	59093	63176	63506
2014-10-12 22:45:24.180	61491	59099	63196	63552
2014-10-12 22:45:24.184	61484	59097	63184	63608
2014-10-12 22:45:24.190	61494	59101	63188	63627
2014-10-12 22:45:24.194	61480	59096	63196	63611
2014-10-12 22:45:24.200	61478	59093	63186	63582
2014-10-12 22:45:24.204	61491	59083	63191	63562
2014-10-12 22:45:24.210	61489	59084	63211	63530
2014-10-12 22:45:24.214	61486	59100	63218	63502
2014-10-12 22:45:24.220	61483	59084	63219	63475
2014-10-12 22:45:24.224	61483	59089	63204	63451
2014-10-12 22:45:24.230	61484	59107	63206	63448
2014-10-12 22:45:24.234	61483	59081	63215	63426
2014-10-12 22:45:24.240	61483	59086	63189	63433
2014-10-12 22:45:24.244	61474	59098	63185	63466
2014-10-12 22:45:24.250	61481	59079	63185	63469
2014-10-12 22:45:24.255	61484	59087	63165	63478
2014-10-12 22:45:24.259	61475	59100	63170	63473
2014-10-12 22:45:24.265	61490	59084	63170	63479
2014-10-12 22:45:24.269	61492	59084	63155	63507
2014-10-12 22:45:24.275	61480	59093	63149	63529
2014-10-12 22:45:24.279	61483	59077	63143	63537
2014-10-12 22:45:24.285	61487	59069	63157	63524
2014-10-12 22:45:24.289	61467	59085	63184	63512
2014-10-12 22:45:24.295	61460	59082	63167	63494
2014-10-12 22:45:24.299	61483	59080	63157	63517
2014-10-12 22:45:24.305	61475	59085	63156	63526
2014-10-12 22:45:24.309	61466	59080	63124	63502
2014-10-12 22:45:24.315	61478	59087	63137	63504
2014-10-12 22:45:24.319	61457	59084	63175	63494
2014-10-12 22:45:24.325	61459	59075	63164	63480
2014-10-12 22:45:24.329	61470	59076	63152	63471
2014-10-12 22:45:24.335	61451	59078	63182	63468
2014-10-12 22:45:24.339	61459	59097	63196	63451
2014-10-12 22:45:24.345	61467	59089	63184	63451
2014-10-12 22:45:24.349	61460	59067	63183	63473
2014-10-12 22:45:24.355	61452	59085	63170	63479
2014-10-12 22:45:24.359	61452	59085	63162	63495
2014-10-12 22:45:24.365	61465	59070	63182	63486
2014-10-12 22:45:24.369	61459	59075	63201	63493
2014-10-12 22:45:24.375	61457	59080	63198	63495
2014-10-12 22:45:24.380	61465	59076	63183	63491
2014-10-12 22:45:24.384	61453	59073	63170	63516
2014-10-12 22:45:24.390	61450	59082	63155	63506
2014-10-12 22:45:24.394	61463	59076	63142	63513
2014-10-12 22:45:24.400	61459	59081	63139	63489
2014-10-12 22:45:24.404	61449	59075	63147	63481
2014-10-12 22:45:24.410	61453	59058	63149	63541
2014-10-12 22:45:24.414	61459	59070	63152	63556
2014-10-12 22:45:24.420	61461	59072	63151	63539
2014-10-12 22:45:24.424	61455	59067	63150	63472
2014-10-12 22:45:24.430	61446	59061	63166	63445
2014-10-12 22:45:24.434	61452	59064	63154	63458
2014-10-12 22:45:24.440	61455	59062	63141	63423
2014-10-12 22:45:24.444	61455	59056	63161	63397
2014-10-12 22:45:24.450	61457	59077	63165	63363
2014-10-12 22:45:24.454	61445	59079	63153	63386
2014-10-12 22:45:24.460	61436	59069	63143	63450
2014-10-12 22:45:24.464	61448	59075	63147	63468
2014-10-12 22:45:24.470	61449	59069	63159	63483
2014-10-12 22:45:24.474	61439	59062	63157	63488
2014-10-12 22:45:24.480	61439	59070	63156	63520
2014-10-12 22:45:24.484	61449	59070	63148	63538
2014-10-12 22:45:24.490	61450	59061	63146	63505
2014-10-12 22:45:24.494	61439	59064	63153	63503
2014-10-12 22:45:24.500	61439	59065	63133	63488
2014-10-12 22:45:24.505	61442	59060	63132	63469
2014-10-12 22:45:24.509	61434	59055	63139	63472
2014-10-12 22:45:24.515	61440	59054	63121	63462
2014-10-12 22:45:24.519	61453	59065	63122	63470
2014-10-12 22:45:24.525	61439	59065	63125	63461
2014-10-12 22:45:24.529	61426	59053	63111	63447
2014-10-12 22:45:24.535	61432	59059	63124	63432
2014-10-12 22:45:24.539	61428	59065	63150	63430
2014-10-12 22:45:24.545	61426	59066	63154	63462
2014-10-12 22:45:24.549	61439	59058	63163	63438
2014-10-12 22:45:24.555	61438	59053	63161	63418
2014-10-12 22:45:24.559	61435	59064	63148	63448
2014-10-12 22:45:24.565	61442	59054	63155	63477
2014-10-12 22:45:24.569	61439	59049	63149	63487
2014-10-12 22:45:24.575	61428	59058	63134	63478
2014-10-12 22:45:24.579	61438	59056	63120	63501
2014-10-12 22:45:24.585	61438	59060	63092	63510
2014-10-12 22:45:24.589	61422	59056	63074	63516
2014-10-12 22:45:24.595	61429	59050	63089	63547
2014-10-12 22:45:24.599	61434	59058	63098	63516
2014-10-12 22:45:24.605	61428	59058	63082	63450
2014-10-12 22:45:24.609	61421	59049	63082	63390
2014-10-12 22:45:24.615	61418	59056	63104	63361
2014-10-12 22:45:24.619	61435	59062	63131	63376
2014-10-12 22:45:24.625	61433	59052	63148	63367
2014-10-12 22:45:24.630	61427	59064	63142	63379
2014-10-12 22:45:24.634	61434	59068	63142	63428
2014-10-12 22:45:24.640	61431	59050	63142	63420
2014-10-12 22:45:24.644	61427	59059	63125	63408
2014-10-12 22:45:24.650	61416	59054	63122	63424
2014-10-12 22:45:24.654	61404	59046	63127	63442
2014-10-12 22:45:24.660	61415	59060	63135	63491
2014-10-12 22:45:24.664	61422	59063	63154	63539
2014-10-12 22:45:24.670	61410	59056	63144	63549
2014-10-12 22:45:24.674	61416	59052	63124	63530
2014-10-12 22:45:24.680	61422	59059	63111	63504
2014-10-12 22:45:24.684	61409	59050	63092	63495
2014-10-12 22:45:24.690	61417	59047	63084	63486
2014-10-12 22:45:24.694	61425	59056	63097	63472
2014-10-12 22:45:24.700	61412	59043	63107	63448
2014-10-12 22:45:24.704	61420	59045	63087	63404
2014-10-12 22:45:24.710	61427	59046	63078	63369
2014-10-12 22:45:24.714	61412	59048	63091	63344
2014-10-12 22:45:24.720	61420	59063	63105	63358
2014-10-12 22:45:24.724	61427	59059	63112	63404
2014-10-12 22:45:24.730	61415	59040	63107	63424
2014-10-12 22:45:24.734	61412	59044	63100	63443
2014-10-12 22:45:24.740	61406	59055	63086	63447
2014-10-12 22:45:24.744	61400	59043	63078	63434
2014-10-12 22:45:24.750	61412	59054	63099	63445
2014-10-12 22:45:24.755	61420	59048	63124	63441
2014-10-12 22:45:24.759	61422	59030	63106	63444
2014-10-12 22:45:24.765	61400	59045	63073	63452
2014-10-12 22:45:24.769	61388	59045	63095	63458
2014-10-12 22:45:24.775	61414	59054	63118	63465
2014-10-12 22:45:24.779	61407	59044	63135	63449
2014-10-12 22:45:24.785	61410	59048	63146	63472
2014-10-12 22:45:24.789	61422	59070	63108	63465
2014-10-12 22:45:24.795	61398	59035	63100	63412
2014-10-12 22:45:24.799	61409	59035	63116	63407
2014-10-12 22:45:24.805	61416	59061	63107	63383
2014-10-12 22:45:24.809	61400	59042	63107	63375
2014-10-12 22:45:24.815	61393	59034	63102	63419
2014-10-12 22:45:24.819	61398	59047	63087	63445
2014-10-12 22:45:24.825	61408	59047	63097	63463
2014-10-12 22:45:24.829	61399	59053	63104	63459
2014-10-12 22:45:24.835	61406	59048	63077	63450
2014-10-12 22:45:24.839	61412	59038	63072	63442
2014-10-12 22:45:24.845	61401	59056	63091	63412
2014-10-12 22:45:24.849	61406	59042	63090	63419
2014-10-12 22:45:24.855	61406	59037	63086	63424
2014-10-12 22:45:24.859	61385	59051	63091	63422
2014-10-12 22:45:24.865	61387	59036	63097	63438
2014-10-12 22:45:24.869	61414	59052	63124	63394
2014-10-12 22:45:24.875	61411	59061	63137	63373
2014-10-12 22:45:24.880	61402	59038	63117	63371
2014-10-12 22:45:24.884	61400	59040	63110	63352
2014-10-12 22:45:24.890	61395	59057	63110	63397
2014-10-12 22:45:24.894	61403	59034	63110	63422
2014-10-12 22:45:24.900	61404	59030	63118	63454
2014-10-12 22:45:24.904	61396	59061	63116	63464
2014-10-12 22:45:24.910	61394	59036	63107	63456
2014-10-12 22:45:24.914	61405	59031	63098	63503
2014-10-12 22:45:24.920	61410	59055	63086	63495
2014-10-12 22:45:24.924	61392	59034	63074	63514
2014-10-12 22:45:24.930	61390	59022	63074	63515
2014-10-12 22:45:24.934	61393	59040	63076	63467
2014-10-12 22:45:24.940	61394	59035	63058	63461
2014-10-12 22:45:24.944	61395	59027	63048	63409
2014-10-12 22:45:24.950	61391	59053	63063	63401
2014-10-12 22:45:24.954	61400	59056	63071	63424
2014-10-12 22:45:24.960	61394	59041	63074	63399
2014-10-12 22:45:24.964	61397	59039	63089	63399
2014-10-12 22:45:24.970	61410	59040	63121	63384
2014-10-12 22:45:24.974	61406	59048	63134	63353
2014-10-12 22:45:24.980	61402	59036	63129	63338
2014-10-12 22:45:24.984	61399	59043	63131	63332
2014-10-12 22:45:24.990	61403	59050	63120	63362
2014-10-12 22:45:24.994	61388	59038	63104	63407
2014-10-12 22:45:25.000	61395	59058	63085	63396
2014-10-12 22:45:25.005	61410	59049	63077	63388
2014-10-12 22:45:25.009	61402	59031	63080	63421
2014-10-12 22:45:25.015	61421	59055	63080	63439
2014-10-12 22:45:25.019	61415	59059	63093	63456
2014-10-12 22:45:25.025	61390	59044	63116	63462
2014-10-12 22:45:25.029	61393	59049	63129	63475
2014-10-12 22:45:25.035	61391	59048	63120	63520
2014-10-12 22:45:25.039	61398	59045	63116	63530
2014-10-12 22:45:25.045	61407	59047	63105	63527
2014-10-12 22:45:25.049	61398	59040	63088	63499
2014-10-12 22:45:25.055	61402	59043	63093	63466
2014-10-12 22:45:25.059	61409	59046	63077	63459
2014-10-12 22:45:25.065	61406	59040	63073	63392
2014-10-12 22:45:25.069	61408	59055	63076	63344
2014-10-12 22:45:25.075	61404	59059	63054	63345
2014-10-12 22:45:25.079	61403	59040	63057	63331
2014-10-12 22:45:25.085	61413	59051	63050	63331
2014-10-12 22:45:25.089	61410	59051	63045	63344
2014-10-12 22:45:25.095	61407	59040	63069	63378
2014-10-12 22:45:25.099	61399	59055	63089	63399
2014-10-12 22:45:25.105	61402	59066	63115	63399
2014-10-12 22:45:25.109	61420	59052	63102	63387
2014-10-12 22:45:25.115	61414	59054	63089	63407
2014-10-12 22:45:25.119	61409	59074	63113	63485
2014-10-12 22:45:25.125	61417	59058	63136	63513
2014-10-12 22:45:25.130	61412	59052	63164	63523
2014-10-12 22:45:25.134	61408	59067	63145	63522
2014-10-12 22:45:25.140	61411	59056	63096	63497
2014-10-12 22:45:25.144	61412	59053	63099	63535
2014-10-12 22:45:25.150	61408	59063	63119	63558
2014-10-12 22:45:25.154	61408	59062	63136	63523
2014-10-12 22:45:25.160	61427	59065	63131	63471
2014-10-12 22:45:25.164	61422	59068	63116	63402
2014-10-12 22:45:25.170	61405	59059	63118	63360
2014-10-12 22:45:25.174	61421	59060	63102	63349
2014-10-12 22:45:25.180	61427	59055	63084	63363
2014-10-12 22:45:25.184	61415	59061	63076	63364
2014-10-12 22:45:25.190	61414	59077	63075	63340
2014-10-12 22:45:25.194	61421	59057	63065	63352
2014-10-12 22:45:25.200	61423	59066	63038	63376
2014-10-12 22:45:25.204	61425	59076	63047	63394
2014-10-12 22:45:25.210	61422	59060	63055	63442
2014-10-12 22:45:25.214	61412	59063	63067	63483
2014-10-12 22:45:25.220	61416	59065	63092	63517
2014-10-12 22:45:25.224	61418	59078	63090	63541
2014-10-12 22:45:25.230	61415	59060	63100	63528
2014-10-12 22:45:25.234	61418	59049	63105	63503
2014-10-12 22:45:25.240	61413	59084	63112	63485
2014-10-12 22:45:25.244	61418	59075	63125	63491
2014-10-12 22:45:25.250	61425	59063	63127	63497
2014-10-12 22:45:25.255	61419	59071	63134	63480
2014-10-12 22:45:25.259	61415	59066	63126	63465
2014-10-12 22:45:25.265	61424	59058	63106	63436
2014-10-12 22:45:25.269	61441	59061	63113	63430
2014-10-12 22:45:25.275	61445	59076	63131	63441
2014-10-12 22:45:25.279	61420	59074	63127	63433
2014-10-12 22:45:25.285	61427	59074	63126	63425
2014-10-12 22:45:25.289	61443	59072	63117	63386
2014-10-12 22:45:25.295	61427	59071	63111	63338
2014-10-12 22:45:25.299	61437	59078	63120	63344
2014-10-12 22:45:25.305	61433	59078	63122	63373
2014-10-12 22:45:25.309	61427	59089	63140	63425
2014-10-12 22:45:25.315	61447	59079	63132	63479
2014-10-12 22:45:25.319	61441	59069	63114	63481
2014-10-12 22:45:25.325	61438	59086	63124	63500
2014-10-12 22:45:25.329	61444	59076	63116	63517
2014-10-12 22:45:25.335	61441	59070	63111	63512
2014-10-12 22:45:25.339	61445	59079	63112	63518
2014-10-12 22:45:25.345	61436	59079	63104	63502
2014-10-12 22:45:25.349	61437	59087	63099	63503
2014-10-12 22:45:25.355	61449	59091	63091	63487
2014-10-12 22:45:25.359	61433	59083	63093	63469
2014-10-12 22:45:25.365	61438	59086	63106	63471
2014-10-12 22:45:25.369	61452	59090	63101	63442
2014-10-12 22:45:25.375	61433	59089	63085	63440
2014-10-12 22:45:25.380	61434	59088	63089	63417
2014-10-12 22:45:25.384	61446	59083	63097	63405
2014-10-12 22:45:25.390	61445	59083	63113	63438
2014-10-12 22:45:25.394	61449	59092	63113	63448
2014-10-12 22:45:25.400	61445	59090	63108	63483
2014-10-12 22:45:25.404	61442	59080	63119	63491
2014-10-12 22:45:25.410	61449	59095	63106	63480
2014-10-12 22:45:25.414	61450	59092	63102	63495
2014-10-12 22:45:25.420	61440	59076	63104	63474
2014-10-12 22:45:25.424	61445	59088	63125	63460
2014-10-12 22:45:25.430	61458	59090	63151	63476
2014-10-12 22:45:25.434	61451	59096	63120	63506
2014-10-12 22:45:25.440	61446	59092	63112	63544
2014-10-12 22:45:25.444	61460	59103	63126	63553
2014-10-12 22:45:25.450	61464	59115	63131	63516
2014-10-12 22:45:25.454	61450	59077	63153	63471
2014-10-12 22:45:25.460	61453	59082	63162	63444
2014-10-12 22:45:25.464	61460	59111	63161	63415
2014-10-12 22:45:25.470	61460	59089	63158	63415
2014-10-12 22:45:25.474	61447	59085	63143	63441
2014-10-12 22:45:25.480	61456	59107	63148	63466
2014-10-12 22:45:25.484	61476	59109	63146	63481
2014-10-12 22:45:25.490	61451	59098	63125	63478
2014-10-12 22:45:25.494	61450	59094	63141	63471
2014-10-12 22:45:25.500	61467	59099	63147	63453
2014-10-12 22:45:25.505	61466	59099	63142	63450
2014-10-12 22:45:25.509	61460	59096	63151	63478
2014-10-12 22:45:25.515	61456	59098	63143	63496
2014-10-12 22:45:25.519	61473	59111	63149	63504
2014-10-12 22:45:25.525	61474	59115	63153	63518
2014-10-12 22:45:25.529	61461	59107	63146	63541
2014-10-12 22:45:25.535	61461	59105	63136	63563
2014-10-12 22:45:25.539	61464	59107	63116	63561
2014-10-12 22:45:25.545	61476	59104	63117	63530
2014-10-12 22:45:25.549	61470	59101	63109	63490
2014-10-12 22:45:25.555	61453	59105	63122	63471
2014-10-12 22:45:25.559	61468	59098	63143	63477
2014-10-12 22:45:25.565	61475	59093	63134	63452
2014-10-12 22:45:25.569	61479	59103	63137	63425
2014-10-12 22:45:25.575	61490	59109	63123	63423
2014-10-12 22:45:25.579	61470	59108	63121	63403
2014-10-12 22:45:25.585	61477	59109	63142	63409
2014-10-12 22:45:25.589	61487	59116	63138	63445
2014-10-12 22:45:25.595	61477	59113	63140	63507
2014-10-12 22:45:25.599	61471	59112	63140	63554
2014-10-12 22:45:25.605	61461	59108	63152	63549
2014-10-12 22:45:25.609	61481	59100	63180	63546
2014-10-12 22:45:25.615	61481	59105	63173	63521
2014-10-12 22:45:25.619	61472	59105	63166	63517
2014-10-12 22:45:25.625	61485	59107	63168	63534
2014-10-12 22:45:25.630	61477	59114	63172	63520
2014-10-12 22:45:25.634	61482	59110	63186	63516
2014-10-12 22:45:25.640	61483	59106	63186	63518
2014-10-12 22:45:25.644	61481	59105	63170	63512
2014-10-12 22:45:25.650	61487	59115	63164	63518
2014-10-12 22:45:25.654	61477	59118	63168	63539
2014-10-12 22:45:25.660	61485	59107	63160	63518
2014-10-12 22:45:25.664	61485	59112	63149	63485
2014-10-12 22:45:25.670	61484	59114	63145	63496
2014-10-12 22:45:25.674	61485	59118	63125	63469
2014-10-12 22:45:25.680	61482	59127	63113	63436
2014-10-12 22:45:25.684	61495	59119	63120	63433
2014-10-12 22:45:25.690	61484	59126	63125	63444
2014-10-12 22:45:25.694	61476	59137	63154	63476
2014-10-12 22:45:25.700	61494	59126	63173	63497
2014-10-12 22:45:25.704	61503	59123	63163	63507
2014-10-12 22:45:25.710	61499	59107	63178	63510
2014-10-12 22:45:25.714	61487	59112	63186	63524
2014-10-12 22:45:25.720	61489	59139	63177	63512
2014-10-12 22:45:25.724	61483	59116	63167	63505
2014-10-12 22:45:25.730	61479	59114	63153	63551
2014-10-12 22:45:25.734	61500	59122	63152	63559
2014-10-12 22:45:25.740	61501	59114	63153	63552
2014-10-12 22:45:25.744	61492	59116	63160	63560
2014-10-12 22:45:25.750	61498	59108	63161	63569
2014-10-12 22:45:25.755	61498	59125	63145	63568
2014-10-12 22:45:25.759	61496	59130	63152	63546
2014-10-12 22:45:25.765	61493	59120	63174	63505
2014-10-12 22:45:25.769	61482	59125	63174	63436
2014-10-12 22:45:25.775	61490	59121	63174	63412
2014-10-12 22:45:25.779	61508	59121	63179	63415
2014-10-12 22:45:25.785	61487	59121	63182	63413
2014-10-12 22:45:25.789	61482	59130	63189	63453
2014-10-12 22:45:25.795	61506	59137	63189	63485
2014-10-12 22:45:25.799	61496	59131	63177	63485
2014-10-12 22:45:25.805	61495	59132	63163	63484
2014-10-12 22:45:25.809	61509	59122	63182	63516
2014-10-12 22:45:25.815	61503	59124	63182	63541
2014-10-12 22:45:25.819	61497	59130	63143	63547
2014-10-12 22:45:25.825	61486	59103	63128	63563
2014-10-12 22:45:25.829	61493	59120	63126	63568
2014-10-12 22:45:25.835	61504	59137	63147	63588
2014-10-12 22:45:25.839	61500	59113	63164	63577
2014-10-12 22:45:25.845	61504	59132	63138	63547
2014-10-12 22:45:25.849	61509	59133	63137	63560
2014-10-12 22:45:25.855	61503	59128	63157	63552
2014-10-12 22:45:25.859	61506	59135	63178	63516
2014-10-12 22:45:25.865	61517	59130	63187	63471
2014-10-12 22:45:25.869	61512	59142	63177	63437
2014-10-12 22:45:25.875	61502	59135	63181	63443
2014-10-12 22:45:25.880	61503	59135	63182	63470
2014-10-12 22:45:25.884	61509	59122	63180	63491
2014-10-12 22:45:25.890	61503	59109	63194	63496
2014-10-12 22:45:25.894	61498	59132	63192	63483
2014-10-12 22:45:25.900	61505	59134	63180	63461
2014-10-12 22:45:25.904	61502	59129	63177	63461
2014-10-12 22:45:25.910	61519	59131	63174	63470
2014-10-12 22:45:25.914	61505	59130	63184	63521
2014-10-12 22:45:25.920	61489	59127	63189	63604
2014-10-12 22:45:25.924	61517	59131	63162	63631
2014-10-12 22:45:25.930	61512	59138	63162	63629
2014-10-12 22:45:25.934	61503	59124	63190	63613
2014-10-12 22:45:25.940	61508	59119	63201	63587
2014-10-12 22:45:25.944	61505	59132	63207	63560
2014-10-12 22:45:25.950	61499	59125	63201	63538
2014-10-12 22:45:25.954	61500	59120	63201	63530
2014-10-12 22:45:25.960	61510	59134	63221	63488
2014-10-12 22:45:25.964	61514	59128	63207	63468
2014-10-12 22:45:25.970	61521	59131	63203	63472
2014-10-12 22:45:25.974	61521	59145	63216	63461
2014-10-12 22:45:25.980	61514	59134	63188	63494
2014-10-12 22:45:25.984	61512	59127	63184	63506
2014-10-12 22:45:25.990	61512	59132	63194	63464
2014-10-12 22:45:25.994	61517	59134	63178	63468
2014-10-12 22:45:26.000	61501	59133	63183	63513
2014-10-12 22:45:26.005	61497	59129	63189	63534
2014-10-12 22:45:26.009	61510	59128	63177	63558
2014-10-12 22:45:26.015	61505	59126	63173	63593
2014-10-12 22:45:26.019	61509	59131	63183	63588
2014-10-12 22:45:26.025	61516	59126	63197	63570
2014-10-12 22:45:26.029	61509	59118	63209	63568
2014-10-12 22:45:26.035	61509	59140	63199	63589
2014-10-12 22:45:26.039	61514	59144	63189	63585
2014-10-12 22:45:26.045	61515	59128	63192	63526
2014-10-12 22:45:26.049	61508	59143	63187	63487
2014-10-12 22:45:26.055	61510	59146	63181	63463
2014-10-12 22:45:26.059	61518	59129	63165	63436
2014-10-12 22:45:26.065	61502	59121	63172	63417
2014-10-12 22:45:26.069	61496	59121	63203	63412
2014-10-12 22:45:26.075	61512	59132	63207	63448
2014-10-12 22:45:26.079	61501	59137	63201	63495
2014-10-12 22:45:26.085	61500	59123	63195	63518
2014-10-12 22:45:26.089	61516	59132	63193	63525
2014-10-12 22:45:26.095	61503	59137	63189	63541
2014-10-12 22:45:26.099	61501	59117	63205	63590
2014-10-12 22:45:26.105	61521	59128	63218	63630
2014-10-12 22:45:26.109	61523	59133	63184	63621
2014-10-12 22:45:26.115	61512	59112	63161	63589
2014-10-12 22:45:26.119	61512	59126	63165	63573
2014-10-12 22:45:26.125	61512	59133	63175	63569
2014-10-12 22:45:26.130	61507	59118	63184	63552
2014-10-12 22:45:26.134	61519	59126	63184	63539
2014-10-12 22:45:26.140	61521	59134	63173	63529
2014-10-12 22:45:26.144	61500	59125	63156	63502
2014-10-12 22:45:26.150	61513	59124	63175	63480
2014-10-12 22:45:26.154	61522	59134	63202	63463
2014-10-12 22:45:26.160	61503	59129	63200	63443
2014-10-12 22:45:26.164	61508	59112	63192	63451
2014-10-12 22:45:26.170	61515	59121	63186	63489
2014-10-12 22:45:26.174	61518	59132	63202	63504
2014-10-12 22:45:26.180	61518	59118	63211	63506
2014-10-12 22:45:26.184	61515	59123	63205	63531
2014-10-12 22:45:26.190	61516	59136	63213	63548
2014-10-12 22:45:26.194	61506	59122	63217	63551
2014-10-12 22:45:26.200	61507	59129	63226	63535
2014-10-12 22:45:26.204	61519	59138	63236	63542
2014-10-12 22:45:26.210	61509	59127	63236	63578
2014-10-12 22:45:26.214	61499	59132	63236	63569
2014-10-12 22:45:26.220	61512	59125	63218	63565
2014-10-12 22:45:26.224	61516	59121	63205	63568
2014-10-12 22:45:26.230	61498	59130	63226	63541
2014-10-12 22:45:26.234	61494	59121	63237	63532
2014-10-12 22:45:26.240	61508	59131	63212	63511
2014-10-12 22:45:26.244	61508	59128	63197	63491
2014-10-12 22:45:26.250	61511	59123	63209	63496
2014-10-12 22:45:26.255	61508	59139	63203	63505
2014-10-12 22:45:26.259	61507	59131	63189	63547
2014-10-12 22:45:26.265	61521	59120	63187	63560
2014-10-12 22:45:26.269	61507	59114	63183	63539
2014-10-12 22:45:26.275	61514	59115	63178	63533
2014-10-12 22:45:26.279	61514	59123	63177	63513
2014-10-12 22:45:26.285	61496	59133	63189	63480
2014-10-12 22:45:26.289	61509	59136	63204	63450
2014-10-12 22:45:26.295	61513	59121	63205	63439
2014-10-12 22:45:26.299	61521	59119	63203	63459
2014-10-12 22:45:26.305	61520	59122	63201	63488
2014-10-12 22:45:26.309	61497	59113	63200	63530
2014-10-12 22:45:26.315	61505	59127	63196	63560
2014-10-12 22:45:26.319	61516	59133	63189	63550
2014-10-12 22:45:26.325	61515	59122	63201	63555
2014-10-12 22:45:26.329	61515	59132	63221	63569
2014-10-12 22:45:26.335	61512	59133	63221	63574
2014-10-12 22:45:26.339	61508	59130	63189	63575
2014-10-12 22:45:26.345	61497	59121	63160	63541
2014-10-12 22:45:26.349	61504	59118	63172	63534
2014-10-12 22:45:26.355	61518	59128	63188	63543
2014-10-12 22:45:26.359	61511	59126	63183	63533
2014-10-12 22:45:26.365	61507	59135	63168	63535
2014-10-12 22:45:26.369	61506	59125	63146	63508
2014-10-12 22:45:26.375	61501	59116	63151	63495
2014-10-12 22:45:26.380	61506	59135	63164	63501
2014-10-12 22:45:26.384	61513	59121	63171	63492
2014-10-12 22:45:26.390	61508	59119	63193	63474
2014-10-12 22:45:26.394	61508	59123	63193	63443
2014-10-12 22:45:26.400	61508	59118	63190	63456
2014-10-12 22:45:26.404	61492	59131	63209	63479
2014-10-12 22:45:26.410	61495	59125	63223	63493
2014-10-12 22:45:26.414	61502	59129	63224	63520
2014-10-12 22:45:26.420	61503	59141	63206	63539
2014-10-12 22:45:26.424	61496	59111	63198	63565
2014-10-12 22:45:26.430	61490	59101	63206	63570
2014-10-12 22:45:26.434	61507	59123	63203	63562
2014-10-12 22:45:26.440	61507	59120	63194	63568
2014-10-12 22:45:26.444	61504	59114	63196	63574
2014-10-12 22:45:26.450	61502	59129	63191	63562
2014-10-12 22:45:26.454	61498	59128	63174	63522
2014-10-12 22:45:26.460	61501	59107	63182	63518
2014-10-12 22:45:26.464	61502	59116	63187	63556
2014-10-12 22:45:26.470	61503	59130	63180	63561
2014-10-12 22:45:26.474	61491	59114	63187	63534
2014-10-12 22:45:26.480	61503	59110	63168	63511
2014-10-12 22:45:26.484	61514	59124	63159	63490
2014-10-12 22:45:26.490	61495	59114	63171	63469
2014-10-12 22:45:26.494	61511	59105	63181	63458
2014-10-12 22:45:26.500	61512	59123	63229	63467
2014-10-12 22:45:26.505	61493	59116	63250	63475
2014-10-12 22:45:26.509	61501	59106	63228	63468
2014-10-12 22:45:26.515	61498	59110	63214	63471
2014-10-12 22:45:26.519	61496	59108	63205	63478
2014-10-12 22:45:26.525	61496	59126	63202	63470
2014-10-12 22:45:26.529	61496	59123	63204	63466
2014-10-12 22:45:26.535	61503	59107	63206	63487
2014-10-12 22:45:26.539	61487	59123	63192	63539
2014-10-12 22:45:26.545	61479	59127	63166	63606
2014-10-12 22:45:26.549	61482	59112	63157	63610
2014-10-12 22:45:26.555	61489	59117	63162	63564
2014-10-12 22:45:26.559	61502	59117	63162	63536
2014-10-12 22:45:26.565	61489	59107	63163	63529
2014-10-12 22:45:26.569	61486	59114	63172	63536
2014-10-12 22:45:26.575	61491	59122	63165	63517
2014-10-12 22:45:26.579	61483	59116	63177	63493
2014-10-12 22:45:26.585	61481	59123	63208	63483
2014-10-12 22:45:26.589	61479	59124	63197	63450
2014-10-12 22:45:26.595	61499	59104	63180	63431
2014-10-12 22:45:26.599	61502	59104	63175	63424
2014-10-12 22:45:26.605	61489	59121	63178	63441
2014-10-12 22:45:26.609	61496	59115	63186	63479
2014-10-12 22:45:26.615	61496	59108	63170	63518
2014-10-12 22:45:26.619	61494	59110	63165	63537
2014-10-12 22:45:26.625	61491	59110	63178	63504
2014-10-12 22:45:26.630	61493	59109	63203	63498
2014-10-12 22:45:26.634	61494	59097	63216	63474
2014-10-12 22:45:26.640	61486	59102	63185	63451
2014-10-12 22:45:26.644	61487	59122	63170	63517
2014-10-12 22:45:26.650	61480	59108	63184	63562
2014-10-12 22:45:26.654	61485	59106	63190	63571
2014-10-12 22:45:26.660	61489	59110	63197	63591
2014-10-12 22:45:26.664	61478	59101	63204	63595
2014-10-12 22:45:26.670	61487	59120	63191	63565
2014-10-12 22:45:26.674	61487	59120	63171	63526
2014-10-12 22:45:26.680	61476	59093	63163	63497
2014-10-12 22:45:26.684	61484	59105	63155	63450
2014-10-12 22:45:26.690	61485	59106	63152	63449
2014-10-12 22:45:26.694	61466	59091	63155	63446
2014-10-12 22:45:26.700	61465	59097	63148	63394
2014-10-12 22:45:26.704	61475	59097	63156	63438
2014-10-12 22:45:26.710	61482	59098	63181	63494
2014-10-12 22:45:26.714	61480	59101	63189	63487
2014-10-12 22:45:26.720	61481	59106	63202	63509
2014-10-12 22:45:26.724	61491	59100	63198	63509
2014-10-12 22:45:26.730	61482	59099	63169	63488
2014-10-12 22:45:26.734	61477	59117	63163	63471
2014-10-12 22:45:26.740	61487	59105	63157	63491
2014-10-12 22:45:26.744	61479	59102	63164	63532
2014-10-12 22:45:26.750	61475	59105	63165	63537
2014-10-12 22:45:26.755	61479	59094	63138	63553
2014-10-12 22:45:26.759	61475	59098	63145	63543
2014-10-12 22:45:26.765	61476	59086	63141	63521
2014-10-12 22:45:26.769	61479	59088	63138	63530
2014-10-12 22:45:26.775	61466	59106	63142	63515
2014-10-12 22:45:26.779	61466	59104	63130	63475
2014-10-12 22:45:26.785	61476	59099	63152	63465
2014-10-12 22:45:26.789	61469	59093	63166	63481
2014-10-12 22:45:26.795	61467	59105	63178	63477
2014-10-12 22:45:26.799	61477	59109	63191	63468
2014-10-12 22:45:26.805	61471	59098	63164	63450
2014-10-12 22:45:26.809	61463	59105	63156	63434
2014-10-12 22:45:26.815	61471	59105	63151	63466
2014-10-12 22:45:26.819	61473	59097	63153	63508
2014-10-12 22:45:26.825	61474	59093	63187	63535
2014-10-12 22:45:26.829	61473	59098	63189	63521
2014-10-12 22:45:26.835	61464	59107	63171	63517
2014-10-12 22:45:26.839	61458	59095	63156	63549
2014-10-12 22:45:26.845	61459	59089	63160	63550
2014-10-12 22:45:26.849	61458	59103	63170	63530
2014-10-12 22:45:26.855	61464	59097	63154	63500
2014-10-12 22:45:26.859	61470	59094	63142	63464
2014-10-12 22:45:26.865	61462	59105	63134	63422
2014-10-12 22:45:26.869	61459	59096	63146	63389
2014-10-12 22:45:26.875	61458	59090	63173	63380
2014-10-12 22:45:26.880	61463	59093	63179	63400
2014-10-12 22:45:26.884	61474	59100	63176	63432
2014-10-12 22:45:26.890	61467	59105	63163	63466
2014-10-12 22:45:26.894	61459	59092	63139	63510
2014-10-12 22:45:26.900	61459	59097	63119	63522
2014-10-12 22:45:26.904	61462	59096	63122	63502
2014-10-12 22:45:26.910	61463	59079	63136	63497
2014-10-12 22:45:26.914	61459	59089	63140	63501
2014-10-12 22:45:26.920	61460	59101	63141	63516
2014-10-12 22:45:26.924	61456	59099	63144	63557
2014-10-12 22:45:26.930	61453	59100	63141	63564
2014-10-12 22:45:26.934	61459	59087	63125	63539
2014-10-12 22:45:26.940	61466	59085	63121	63516
2014-10-12 22:45:26.944	61460	59098	63127	63497
2014-10-12 22:45:26.950	61458	59084	63119	63521
2014-10-12 22:45:26.954	61462	59086	63123	63530
2014-10-12 22:45:26.960	61453	59103	63135	63470
2014-10-12 22:45:26.964	61460	59087	63135	63392
2014-10-12 22:45:26.970	61460	59087	63133	63372
2014-10-12 22:45:26.974	61460	59105	63135	63371
2014-10-12 22:45:26.980	61464	59090	63140	63364
2014-10-12 22:45:26.984	61447	59082	63144	63404
2014-10-12 22:45:26.990	61452	59085	63144	63432
2014-10-12 22:45:26.994	61454	59081	63147	63443
2014-10-12 22:45:27.000	61447	59077	63156	63464
2014-10-12 22:45:27.005	61453	59083	63146	63504
2014-10-12 22:45:27.009	61458	59095	63131	63529
2014-10-12 22:45:27.015	61454	59092	63126	63542
2014-10-12 22:45:27.019	61451	59077	63119	63580
2014-10-12 22:45:27.025	61452	59078	63146	63563
2014-10-12 22:45:27.029	61451	59085	63167	63527
2014-10-12 22:45:27.035	61447	59073	63165	63503
2014-10-12 22:45:27.039	61446	59072	63159	63501
2014-10-12 22:45:27.045	61450	59077	63135	63517
2014-10-12 22:45:27.049	61451	59059	63135	63500
2014-10-12 22:45:27.055	61445	59070	63127	63496
2014-10-12 22:45:27.059	61445	59095	63106	63465
2014-10-12 22:45:27.065	61449	59079	63112	63409
2014-10-12 22:45:27.069	61447	59076	63119	63385
2014-10-12 22:45:27.075	61437	59080	63121	63357
2014-10-12 22:45:27.079	61439	59074	63122	63371
2014-10-12 22:45:27.085	61447	59080	63127	63423
2014-10-12 22:45:27.089	61441	59077	63118	63476
2014-10-12 22:45:27.095	61444	59074	63096	63517
2014-10-12 22:45:27.099	61442	59076	63105	63482
2014-10-12 22:45:27.105	61429	59076	63120	63444
2014-10-12 22:45:27.109	61435	59085	63131	63448
2014-10-12 22:45:27.115	61441	59073	63141	63450
2014-10-12 22:45:27.119	61447	59070	63145	63469
2014-10-12 22:45:27.125	61445	59081	63157	63482
2014-10-12 22:45:27.130	61430	59075	63146	63483
2014-10-12 22:45:27.134	61430	59081	63109	63502
2014-10-12 22:45:27.140	61439	59081	63098	63511
2014-10-12 22:45:27.144	61440	59072	63108	63485
2014-10-12 22:45:27.150	61432	59076	63116	63462
2014-10-12 22:45:27.154	61440	59078	63145	63460
2014-10-12 22:45:27.160	61444	59079	63151	63466
2014-10-12 22:45:27.164	61438	59076	63119	63450
2014-10-12 22:45:27.170	61444	59069	63119	63440
2014-10-12 22:45:27.174	61443	59079	63125	63446
2014-10-12 22:45:27.180	61436	59076	63125	63426
2014-10-12 22:45:27.184	61435	59062	63127	63436
2014-10-12 22:45:27.190	61440	59074	63123	63441
2014-10-12 22:45:27.194	61443	59083	63126	63442
2014-10-12 22:45:27.200	61437	59072	63120	63484
2014-10-12 22:45:27.204	61440	59068	63125	63501
2014-10-12 22:45:27.210	61437	59071	63123	63485
2014-10-12 22:45:27.214	61435	59073	63121	63458
2014-10-12 22:45:27.220	61434	59070	63130	63432
2014-10-12 22:45:27.224	61428	59073	63128	63410
2014-10-12 22:45:27.230	61425	59076	63142	63406
2014-10-12 22:45:27.234	61432	59064	63149	63417
2014-10-12 22:45:27.240	61437	59070	63140	63432
2014-10-12 22:45:27.244	61434	59067	63141	63471
2014-10-12 22:45:27.250	61438	59060	63147	63503
2014-10-12 22:45:27.255	61433	59080	63145	63516
2014-10-12 22:45:27.259	61435	59063	63117	63527
2014-10-12 22:45:27.265	61426	59059	63106	63515
2014-10-12 22:45:27.269	61414	59069	63102	63471
2014-10-12 22:45:27.275	61433	59047	63094	63430
2014-10-12 22:45:27.279	61429	59057	63099	63459
2014-10-12 22:45:27.285	61417	59053	63082	63502
2014-10-12 22:45:27.289	61430	59045	63081	63500
2014-10-12 22:45:27.295	61438	59064	63108	63478
2014-10-12 22:45:27.299	61437	59065	63125	63423
2014-10-12 22:45:27.305	61428	59070	63130	63362
2014-10-12 22:45:27.309	61427	59059	63135	63324
2014-10-12 22:45:27.315	61417	59055	63147	63330
2014-10-12 22:45:27.319	61430	59071	63137	63373
2014-10-12 22:45:27.325	61440	59056	63122	63446
2014-10-12 22:45:27.329	61414	59051	63124	63515
2014-10-12 22:45:27.335	61420	59063	63125	63497
2014-10-12 22:45:27.339	61427	59054	63119	63469
2014-10-12 22:45:27.345	61422	59053	63115	63476
2014-10-12 22:45:27.349	61426	59064	63124	63427
2014-10-12 22:45:27.355	61421	59057	63122	63398
2014-10-12 22:45:27.359	61415	59045	63114	63442
2014-10-12 22:45:27.365	61419	59056	63110	63489
2014-10-12 22:45:27.369	61431	59053	63105	63530
2014-10-12 22:45:27.375	61424	59047	63104	63530
2014-10-12 22:45:27.380	61424	59059	63095	63494
2014-10-12 22:45:27.384	61431	59056	63102	63462
2014-10-12 22:45:27.390	61416	59044	63108	63410
2014-10-12 22:45:27.394	61425	59048	63099	63395
2014-10-12 22:45:27.400	61413	59043	63094	63396
2014-10-12 22:45:27.404	61404	59043	63083	63370
2014-10-12 22:45:27.410	61430	59055	63079	63392
2014-10-12 22:45:27.414	61424	59061	63091	63406
2014-10-12 22:45:27.420	61431	59055	63112	63413
2014-10-12 22:45:27.424	61437	59043	63111	63471
2014-10-12 22:45:27.430	61418	59041	63096	63493
2014-10-12 22:45:27.434	61425	59043	63101	63507
2014-10-12 22:45:27.440	61423	59059	63122	63521
2014-10-12 22:45:27.444	61410	59048	63147	63495
2014-10-12 22:45:27.450	61411	59038	63141	63479
2014-10-12 22:45:27.454	61418	59064	63129	63431
2014-10-12 22:45:27.460	61422	59044	63124	63384
2014-10-12 22:45:27.464	61413	59038	63131	63384
2014-10-12 22:45:27.470	61411	59056	63158	63382
2014-10-12 22:45:27.474	61412	59045	63152	63405
2014-10-12 22:45:27.480	61414	59047	63147	63458
2014-10-12 22:45:27.484	61416	59054	63141	63494
2014-10-12 22:45:27.490	61423	59044	63124	63464
2014-10-12 22:45:27.494	61433	59031	63136	63446
2014-10-12 22:45:27.500	61412	59032	63138	63449
2014-10-12 22:45:27.505	61406	59047	63120	63420
2014-10-12 22:45:27.509	61432	59040	63092	63439
2014-10-12 22:45:27.515	61424	59024	63081	63457
2014-10-12 22:45:27.519	61415	59029	63084	63441
2014-10-12 22:45:27.525	61421	59023	63085	63449
2014-10-12 22:45:27.529	61411	59025	63102	63472
2014-10-12 22:45:27.535	61409	59047	63100	63472
2014-10-12 22:45:27.539	61419	59037	63094	63439
2014-10-12 22:45:27.545	61412	59032	63111	63429
2014-10-12 22:45:27.549	61404	59032	63110	63422
2014-10-12 22:45:27.555	61409	59015	63111	63411
2014-10-12 22:45:27.559	61407	59035	63123	63410
2014-10-12 22:45:27.565	61405	59042	63133	63418
2014-10-12 22:45:27.569	61415	59024	63161	63467
2014-10-12 22:45:27.575	61415	59031	63172	63496
2014-10-12 22:45:27.579	61411	59040	63165	63457
2014-10-12 22:45:27.585	61422	59030	63147	63399
2014-10-12 22:45:27.589	61427	59028	63117	63389
2014-10-12 22:45:27.595	61406	59046	63121	63404
2014-10-12 22:45:27.599	61394	59033	63123	63433
2014-10-12 22:45:27.605	61416	59012	63102	63471
2014-10-12 22:45:27.609	61421	59037	63091	63467
2014-10-12 22:45:27.615	61409	59029	63076	63467
2014-10-12 22:45:27.619	61417	59018	63072	63454
2014-10-12 22:45:27.625	61410	59038	63091	63435
2014-10-12 22:45:27.630	61408	59034	63096	63433
2014-10-12 22:45:27.634	61419	59025	63103	63415
2014-10-12 22:45:27.640	61412	59030	63114	63424
2014-10-12 22:45:27.644	61413	59036	63108	63434
2014-10-12 22:45:27.650	61415	59020	63114	63421
2014-10-12 22:45:27.654	61419	59028	63130	63412
2014-10-12 22:45:27.660	61422	59041	63140	63413
2014-10-12 22:45:27.664	61415	59019	63147	63446
2014-10-12 22:45:27.670	61418	59022	63147	63442
2014-10-12 22:45:27.674	61411	59028	63142	63448
2014-10-12 22:45:27.680	61405	59032	63123	63485
2014-10-12 22:45:27.684	61411	59025	63127	63482
2014-10-12 22:45:27.690	61413	59014	63134	63481
2014-10-12 22:45:27.694	61410	59039	63120	63454
2014-10-12 22:45:27.700	61416	59026	63129	63440
2014-10-12 22:45:27.704	61415	59021	63121	63449
2014-10-12 22:45:27.710	61412	59038	63092	63425
2014-10-12 22:45:27.714	61416	59023	63107	63424
2014-10-12 22:45:27.720	61408	59018	63116	63443
2014-10-12 22:45:27.724	61413	59016	63112	63446
2014-10-12 22:45:27.730	61414	59015	63123	63439
2014-10-12 22:45:27.734	61407	59025	63106	63443
2014-10-12 22:45:27.740	61414	59021	63100	63423
2014-10-12 22:45:27.744	61406	59008	63127	63392
2014-10-12 22:45:27.750	61417	59015	63140	63406
2014-10-12 22:45:27.755	61426	59023	63134	63433
2014-10-12 22:45:27.759	61420	59012	63120	63447
2014-10-12 22:45:27.765	61429	59009	63115	63455
2014-10-12 22:45:27.769	61407	59020	63116	63430
2014-10-12 22:45:27.775	61400	59024	63102	63410
2014-10-12 22:45:27.779	61421	59010	63095	63440
2014-10-12 22:45:27.785	61419	59024	63096	63456
2014-10-12 22:45:27.789	61413	59032	63104	63460
2014-10-12 22:45:27.795	61408	59013	63121	63461
2014-10-12 22:45:27.799	61418	59025	63129	63428
2014-10-12 22:45:27.805	61425	59024	63129	63414
2014-10-12 22:45:27.809	61417	59022	63122	63417
2014-10-12 22:45:27.815	61414	59026	63125	63421
2014-10-12 22:45:27.819	61409	59014	63136	63472
2014-10-12 22:45:27.825	61413	59029	63148	63520
2014-10-12 22:45:27.829	61421	59026	63150	63497
2014-10-12 22:45:27.835	61410	59002	63135	63453
2014-10-12 22:45:27.839	61398	59026	63140	63429
2014-10-12 22:45:27.845	61412	59040	63137	63433
2014-10-12 22:45:27.849	61421	59016	63117	63435
2014-10-12 22:45:27.855	61410	59023	63104	63423
2014-10-12 22:45:27.859	61408	59030	63103	63412
2014-10-12 22:45:27.865	61420	59019	63110	63380
2014-10-12 22:45:27.869	61416	59028	63101	63383
2014-10-12 22:45:27.875	61401	59021	63104	63415
2014-10-12 22:45:27.880	61418	59010	63110	63416
2014-10-12 22:45:27.884	61419	59022	63116	63426
2014-10-12 22:45:27.890	61411	59020	63134	63423
2014-10-12 22:45:27.894	61424	59013	63148	63404
2014-10-12 22:45:27.900	61412	59014	63157	63407
2014-10-12 22:45:27.904	61405	59025	63164	63397
2014-10-12 22:45:27.910	61418	59026	63167	63400
2014-10-12 22:45:27.914	61420	59018	63161	63458
2014-10-12 22:45:27.920	61408	59021	63160	63512
2014-10-12 22:45:27.924	61407	59018	63157	63527
2014-10-12 22:45:27.930	61418	59015	63163	63523
2014-10-12 22:45:27.934	61414	59016	63167	63493
2014-10-12 22:45:27.940	61409	59020	63149	63452
2014-10-12 22:45:27.944	61415	59026	63147	63446
2014-10-12 22:45:27.950	61411	59014	63131	63462
2014-10-12 22:45:27.954	61408	59022	63104	63451
2014-10-12 22:45:27.960	61415	59027	63106	63428
2014-10-12 22:45:27.964	61412	58999	63118	63426
2014-10-12 22:45:27.970	61410	59013	63115	63408
2014-10-12 22:45:27.974	61414	59037	63106	63404
2014-10-12 22:45:27.980	61414	59015	63114	63440
2014-10-12 22:45:27.984	61424	59020	63118	63457
2014-10-12 22:45:27.990	61425	59023	63113	63456
2014-10-12 22:45:27.994	61414	59008	63124	63406
2014-10-12 22:45:28.000	61418	59021	63129	63369
2014-10-12 22:45:28.005	61423	59026	63118	63373
2014-10-12 22:45:28.009	61422	59024	63099	63348
2014-10-12 22:45:28.015	61423	59019	63113	63343
2014-10-12 22:45:28.019	61422	59017	63139	63378
2014-10-12 22:45:28.025	61411	59024	63129	63437
2014-10-12 22:45:28.029	61406	59025	63132	63497
2014-10-12 22:45:28.035	61414	59020	63135	63549
2014-10-12 22:45:28.039	61417	59019	63130	63547
2014-10-12 22:45:28.045	61412	59027	63138	63496
2014-10-12 22:45:28.049	61419	59025	63144	63480
2014-10-12 22:45:28.055	61420	59019	63152	63471
2014-10-12 22:45:28.059	61417	59025	63147	63470
2014-10-12 22:45:28.065	61426	59033	63141	63457
2014-10-12 22:45:28.069	61418	59033	63152	63450
2014-10-12 22:45:28.075	61421	59040	63167	63459
2014-10-12 22:45:28.079	61439	59042	63168	63432
2014-10-12 22:45:28.085	61422	59016	63147	63409
2014-10-12 22:45:28.089	61418	59014	63131	63359
2014-10-12 22:45:28.095	61421	59035	63115	63368
2014-10-12 22:45:28.099	61408	59030	63106	63438
2014-10-12 22:45:28.105	61412	59031	63118	63453
2014-10-12 22:45:28.109	61412	59037	63112	63476
2014-10-12 22:45:28.115	61405	59028	63098	63495
2014-10-12 22:45:28.119	61423	59039	63108	63488
2014-10-12 22:45:28.125	61437	59036	63117	63475
2014-10-12 22:45:28.130	61423	59005	63120	63460
2014-10-12 22:45:28.134	61424	59026	63133	63432
2014-10-12 22:45:28.140	61425	59035	63132	63407
2014-10-12 22:45:28.144	61425	59014	63121	63407
2014-10-12 22:45:28.150	61437	59027	63117	63406
2014-10-12 22:45:28.154	61430	59030	63113	63429
2014-10-12 22:45:28.160	61422	59035	63107	63452
2014-10-12 22:45:28.164	61417	59033	63119	63434
2014-10-12 22:45:28.170	61413	59030	63137	63417
2014-10-12 22:45:28.174	61424	59032	63138	63402
2014-10-12 22:45:28.180	61428	59029	63137	63395
2014-10-12 22:45:28.184	61432	59039	63138	63423
2014-10-12 22:45:28.190	61426	59026	63152	63439
2014-10-12 22:45:28.194	61422	59037	63169	63475
2014-10-12 22:45:28.200	61429	59052	63154	63525
2014-10-12 22:45:28.204	61421	59021	63150	63508
2014-10-12 22:45:28.210	61429	59019	63158	63495
2014-10-12 22:45:28.214	61440	59039	63161	63489
2014-10-12 22:45:28.220	61420	59021	63166	63474
2014-10-12 22:45:28.224	61422	59021	63156	63464
2014-10-12 22:45:28.230	61429	59057	63145	63441
2014-10-12 22:45:28.234	61431	59044	63130	63448
2014-10-12 22:45:28.240	61436	59032	63125	63430
2014-10-12 22:45:28.244	61423	59052	63131	63392
2014-10-12 22:45:28.250	61425	59038	63124	63375
2014-10-12 22:45:28.255	61442	59029	63135	63373
2014-10-12 22:45:28.259	61428	59036	63143	63403
2014-10-12 22:45:28.265	61421	59040	63139	63408
2014-10-12 22:45:28.269	61434	59038	63134	63428
2014-10-12 22:45:28.275	61425	59037	63131	63458
2014-10-12 22:45:28.279	61419	59046	63145	63461
2014-10-12 22:45:28.285	61430	59032	63149	63482
2014-10-12 22:45:28.289	61440	59042	63153	63487
2014-10-12 22:45:28.295	61429	59058	63147	63514
2014-10-12 22:45:28.299	61429	59042	63135	63532
2014-10-12 22:45:28.305	61446	59039	63141	63497
2014-10-12 22:45:28.309	61429	59047	63141	63485
2014-10-12 22:45:28.315	61436	59047	63144	63468
2014-10-12 22:45:28.319	61445	59042	63141	63448
2014-10-12 22:45:28.325	61429	59048	63129	63460
2014-10-12 22:45:28.329	61440	59039	63128	63454
2014-10-12 22:45:28.335	61441	59028	63132	63439
2014-10-12 22:45:28.339	61439	59038	63146	63452
2014-10-12 22:45:28.345	61431	59034	63160	63456
2014-10-12 22:45:28.349	61426	59038	63152	63454
2014-10-12 22:45:28.355	61438	59045	63152	63453
2014-10-12 22:45:28.359	61439	59053	63147	63426
2014-10-12 22:45:28.365	61438	59060	63131	63399
2014-10-12 22:45:28.369	61439	59038	63140	63348
2014-10-12 22:45:28.375	61436	59032	63143	63349
2014-10-12 22:45:28.380	61440	59045	63153	63432
2014-10-12 22:45:28.384	61440	59043	63156	63469
2014-10-12 22:45:28.390	61436	59050	63134	63465
2014-10-12 22:45:28.394	61455	59054	63147	63477
2014-10-12 22:45:28.400	61457	59044	63159	63502
2014-10-12 22:45:28.404	61437	59046	63144	63490
2014-10-12 22:45:28.410	61437	59044	63144	63490
2014-10-12 22:45:28.414	61437	59041	63159	63509
2014-10-12 22:45:28.420	61441	59047	63163	63492
2014-10-12 22:45:28.424	61448	59050	63163	63500
2014-10-12 22:45:28.430	61456	59048	63156	63535
2014-10-12 22:45:28.434	61452	59053	63152	63525
2014-10-12 22:45:28.440	61446	59064	63167	63461
2014-10-12 22:45:28.444	61452	59057	63155	63414
2014-10-12 22:45:28.450	61436	59056	63137	63381
2014-10-12 22:45:28.454	61433	59055	63134	63380
2014-10-12 22:45:28.460	61442	59041	63125	63418
2014-10-12 22:45:28.464	61436	59048	63129	63435
2014-10-12 22:45:28.470	61436	59051	63127	63445
2014-10-12 22:45:28.474	61447	59051	63119	63431
2014-10-12 22:45:28.480	61450	59060	63116	63418
2014-10-12 22:45:28.484	61448	59046	63107	63434
2014-10-12 22:45:28.490	61450	59042	63114	63438
2014-10-12 22:45:28.494	61450	59060	63128	63457
2014-10-12 22:45:28.500	61445	59055	63149	63486
2014-10-12 22:45:28.505	61438	59047	63171	63512
2014-10-12 22:45:28.509	61451	59058	63165	63546
2014-10-12 22:45:28.515	61452	59062	63161	63584
2014-10-12 22:45:28.519	61437	59057	63179	63593
2014-10-12 22:45:28.525	61452	59053	63174	63556
2014-10-12 22:45:28.529	61452	59044	63153	63526
2014-10-12 22:45:28.535	61441	59049	63154	63484
2014-10-12 22:45:28.539	61449	59050	63166	63420
2014-10-12 22:45:28.545	61441	59065	63171	63395
2014-10-12 22:45:28.549	61445	59087	63165	63362
2014-10-12 22:45:28.555	61453	59057	63158	63343
2014-10-12 22:45:28.559	61450	59057	63149	63374
2014-10-12 22:45:28.565	61466	59074	63150	63380
2014-10-12 22:45:28.569	61453	59047	63162	63390
2014-10-12 22:45:28.575	61428	59061	63148	63410
2014-10-12 22:45:28.579	61458	59060	63130	63421
2014-10-12 22:45:28.585	61466	59047	63135	63461
2014-10-12 22:45:28.589	61454	59065	63148	63495
2014-10-12 22:45:28.595	61455	59063	63157	63513
2014-10-12 22:45:28.599	61458	59068	63164	63516
2014-10-12 22:45:28.605	61466	59075	63171	63525
2014-10-12 22:45:28.609	61448	59071	63172	63567
2014-10-12 22:45:28.615	61448	59081	63164	63557
2014-10-12 22:45:28.619	61467	59072	63173	63563
2014-10-12 22:45:28.625	61458	59065	63166	63578
2014-10-12 22:45:28.630	61455	59081	63150	63507
2014-10-12 22:45:28.634	61464	59076	63145	63456
2014-10-12 22:45:28.640	61463	59061	63135	63401
2014-10-12 22:45:28.644	61456	59056	63153	63376
2014-10-12 22:45:28.650	61460	59068	63144	63389
2014-10-12 22:45:28.654	61465	59073	63135	63368
2014-10-12 22:45:28.660	61458	59071	63157	63402
2014-10-12 22:45:28.664	61461	59087	63154	63423
2014-10-12 22:45:28.670	61463	59082	63159	63422
2014-10-12 22:45:28.674	61460	59079	63163	63424
2014-10-12 22:45:28.680	61468	59084	63166	63437
2014-10-12 22:45:28.684	61467	59062	63175	63504
2014-10-12 22:45:28.690	61447	59063	63172	63510
2014-10-12 22:45:28.694	61448	59065	63168	63503
2014-10-12 22:45:28.700	61465	59071	63166	63540
2014-10-12 22:45:28.704	61462	59075	63159	63531
2014-10-12 22:45:28.710	61463	59068	63134	63536
2014-10-12 22:45:28.714	61466	59086	63119	63542
2014-10-12 22:45:28.720	61478	59073	63133	63536
2014-10-12 22:45:28.724	61469	59066	63156	63544
2014-10-12 22:45:28.730	61448	59082	63170	63512
2014-10-12 22:45:28.734	61463	59072	63178	63489
2014-10-12 22:45:28.740	61463	59086	63197	63483
2014-10-12 22:45:28.744	61463	59084	63206	63450
2014-10-12 22:45:28.750	61470	59074	63200	63432
2014-10-12 22:45:28.755	61468	59092	63193	63434
2014-10-12 22:45:28.759	61471	59073	63172	63443
2014-10-12 22:45:28.765	61462	59069	63150	63429
2014-10-12 22:45:28.769	61468	59082	63136	63385
2014-10-12 22:45:28.775	61466	59068	63133	63363
2014-10-12 22:45:28.779	61458	59080	63130	63367
2014-10-12 22:45:28.785	61474	59081	63120	63421
2014-10-12 22:45:28.789	61460	59073	63110	63476
2014-10-12 22:45:28.795	61450	59092	63111	63504
2014-10-12 22:45:28.799	61469	59092	63126	63520
2014-10-12 22:45:28.805	61468	59085	63131	63509
2014-10-12 22:45:28.809	61471	59081	63129	63544
2014-10-12 22:45:28.815	61475	59076	63123	63563
2014-10-12 22:45:28.819	61458	59083	63125	63554
2014-10-12 22:45:28.825	61464	59077	63140	63559
2014-10-12 22:45:28.829	61473	59084	63127	63493
2014-10-12 22:45:28.835	61463	59099	63129	63439
2014-10-12 22:45:28.839	61466	59092	63163	63431
2014-10-12 22:45:28.845	61466	59082	63187	63441
2014-10-12 22:45:28.849	61463	59087	63197	63474
2014-10-12 22:45:28.855	61465	59089	63204	63488
2014-10-12 22:45:28.859	61463	59090	63202	63521
2014-10-12 22:45:28.865	61471	59094	63182	63527
2014-10-12 22:45:28.869	61471	59085	63187	63474
2014-10-12 22:45:28.875	61469	59086	63193	63417
2014-10-12 22:45:28.880	61469	59090	63176	63408
2014-10-12 22:45:28.884	61464	59092	63165	63438
2014-10-12 22:45:28.890	61477	59100	63156	63468
2014-10-12 22:45:28.894	61477	59088	63159	63503
2014-10-12 22:45:28.900	61460	59085	63167	63483
2014-10-12 22:45:28.904	61474	59092	63170	63464
2014-10-12 22:45:28.910	61476	59088	63159	63489
2014-10-12 22:45:28.914	61463	59095	63143	63489
2014-10-12 22:45:28.920	61468	59099	63137	63493
2014-10-12 22:45:28.924	61467	59093	63130	63501
2014-10-12 22:45:28.930	61469	59086	63130	63492
2014-10-12 22:45:28.934	61469	59094	63131	63462
2014-10-12 22:45:28.940	61478	59100	63149	63464
2014-10-12 22:45:28.944	61479	59099	63180	63498
2014-10-12 22:45:28.950	61476	59097	63180	63496
2014-10-12 22:45:28.954	61470	59089	63157	63489
2014-10-12 22:45:28.960	61460	59100	63150	63500
2014-10-12 22:45:28.964	61472	59099	63149	63506
2014-10-12 22:45:28.970	61468	59089	63137	63485
2014-10-12 22:45:28.974	61463	59099	63149	63484
2014-10-12 22:45:28.980	61471	59104	63172	63515
2014-10-12 22:45:28.984	61469	59106	63177	63521
2014-10-12 22:45:28.990	61479	59086	63160	63535
2014-10-12 22:45:28.994	61473	59083	63151	63520
2014-10-12 22:45:29.000	61468	59108	63151	63488
2014-10-12 22:45:29.005	61464	59108	63139	63484
2014-10-12 22:45:29.009	61457	59103	63141	63438
2014-10-12 22:45:29.015	61472	59093	63151	63405
2014-10-12 22:45:29.019	61462	59098	63169	63424
2014-10-12 22:45:29.025	61458	59098	63174	63436
2014-10-12 22:45:29.029	61482	59090	63164	63451
2014-10-12 22:45:29.035	61476	59114	63166	63464
2014-10-12 22:45:29.039	61469	59101	63162	63468
2014-10-12 22:45:29.045	61486	59098	63154	63498
2014-10-12 22:45:29.049	61482	59104	63148	63511
2014-10-12 22:45:29.055	61464	59083	63137	63506
2014-10-12 22:45:29.059	61466	59105	63117	63519
2014-10-12 22:45:29.065	61469	59104	63107	63503
2014-10-12 22:45:29.069	61474	59095	63118	63480
2014-10-12 22:45:29.075	61473	59108	63133	63469
2014-10-12 22:45:29.079	61465	59106	63138	63466
2014-10-12 22:45:29.085	61476	59115	63134	63460
2014-10-12 22:45:29.089	61480	59100	63166	63447
2014-10-12 22:45:29.095	61478	59098	63182	63451
2014-10-12 22:45:29.099	61472	59111	63167	63451
2014-10-12 22:45:29.105	61467	59106	63173	63466
2014-10-12 22:45:29.109	61479	59110	63162	63471
2014-10-12 22:45:29.115	61475	59104	63155	63484
2014-10-12 22:45:29.119	61476	59105	63168	63535
2014-10-12 22:45:29.125	61476	59105	63189	63563
2014-10-12 22:45:29.130	61459	59110	63188	63580
2014-10-12 22:45:29.134	61474	59120	63155	63575
2014-10-12 22:45:29.140	61478	59097	63135	63552
2014-10-12 22:45:29.144	61463	59110	63123	63510
2014-10-12 22:45:29.150	61473	59127	63125	63462
2014-10-12 22:45:29.154	61478	59100	63139	63428
2014-10-12 22:45:29.160	61482	59116	63150	63376
2014-10-12 22:45:29.164	61484	59126	63146	63380
2014-10-12 22:45:29.170	61474	59100	63122	63398
2014-10-12 22:45:29.174	61464	59105	63128	63391
2014-10-12 22:45:29.180	61477	59106	63148	63413
2014-10-12 22:45:29.184	61484	59106	63162	63437
2014-10-12 22:45:29.190	61465	59119	63162	63480
2014-10-12 22:45:29.194	61473	59104	63157	63523
2014-10-12 22:45:29.200	61478	59106	63168	63564
2014-10-12 22:45:29.204	61467	59125	63148	63605
2014-10-12 22:45:29.210	61466	59120	63141	63590
2014-10-12 22:45:29.214	61480	59109	63164	63559
2014-10-12 22:45:29.220	61483	59118	63157	63526
2014-10-12 22:45:29.224	61476	59116	63156	63511
2014-10-12 22:45:29.230	61481	59096	63156	63511
2014-10-12 22:45:29.234	61470	59110	63150	63475
2014-10-12 22:45:29.240	61466	59122	63152	63438
2014-10-12 22:45:29.244	61473	59118	63142	63416
2014-10-12 22:45:29.250	61475	59120	63151	63418
2014-10-12 22:45:29.255	61487	59114	63162	63436
2014-10-12 22:45:29.259	61482	59112	63157	63452
2014-10-12 22:45:29.265	61468	59117	63143	63478
2014-10-12 22:45:29.269	61476	59127	63135	63493
2014-10-12 22:45:29.275	61483	59124	63132	63510
2014-10-12 22:45:29.279	61474	59103	63113	63532
2014-10-12 22:45:29.285	61478	59107	63118	63518
2014-10-12 22:45:29.289	61470	59123	63118	63519
2014-10-12 22:45:29.295	61466	59112	63100	63537
2014-10-12 22:45:29.299	61478	59111	63119	63518
2014-10-12 22:45:29.305	61471	59115	63121	63503
2014-10-12 22:45:29.309	61473	59107	63119	63477
2014-10-12 22:45:29.315	61474	59110	63147	63442
2014-10-12 22:45:29.319	61464	59117	63166	63429
2014-10-12 22:45:29.325	61476	59115	63185	63423
2014-10-12 22:45:29.329	61486	59106	63189	63444
2014-10-12 22:45:29.335	61478	59120	63168	63476
2014-10-12 22:45:29.339	61474	59124	63159	63490
2014-10-12 22:45:29.345	61477	59107	63165	63494
2014-10-12 22:45:29.349	61477	59113	63166	63490
2014-10-12 22:45:29.355	61476	59113	63169	63494
2014-10-12 22:45:29.359	61479	59120	63174	63487
2014-10-12 22:45:29.365	61480	59116	63177	63477
2014-10-12 22:45:29.369	61473	59106	63171	63492
2014-10-12 22:45:29.375	61474	59121	63165	63505
2014-10-12 22:45:29.380	61474	59103	63158	63521
2014-10-12 22:45:29.384	61463	59104	63134	63518
2014-10-12 22:45:29.390	61478	59121	63122	63512
2014-10-12 22:45:29.394	61480	59103	63114	63521
2014-10-12 22:45:29.400	61470	59113	63109	63493
2014-10-12 22:45:29.404	61484	59131	63118	63480
2014-10-12 22:45:29.410	61487	59123	63127	63468
2014-10-12 22:45:29.414	61490	59109	63148	63437
2014-10-12 22:45:29.420	61480	59105	63143	63468
2014-10-12 22:45:29.424	61469	59109	63145	63492
2014-10-12 22:45:29.430	61480	59109	63148	63474
2014-10-12 22:45:29.434	61469	59106	63138	63477
2014-10-12 22:45:29.440	61469	59117	63160	63529
2014-10-12 22:45:29.444	61480	59130	63164	63568
2014-10-12 22:45:29.450	61472	59116	63175	63529
2014-10-12 22:45:29.454	61472	59105	63187	63491
2014-10-12 22:45:29.460	61472	59112	63157	63459
2014-10-12 22:45:29.464	61474	59112	63144	63425
2014-10-12 22:45:29.470	61469	59108	63158	63422
2014-10-12 22:45:29.474	61468	59114	63163	63419
2014-10-12 22:45:29.480	61486	59124	63152	63441
2014-10-12 22:45:29.484	61480	59116	63154	63498
2014-10-12 22:45:29.490	61476	59108	63171	63519
2014-10-12 22:45:29.494	61485	59112	63164	63507
2014-10-12 22:45:29.500	61468	59124	63157	63508
2014-10-12 22:45:29.505	61469	59121	63158	63508
2014-10-12 22:45:29.509	61483	59104	63145	63498
2014-10-12 22:45:29.515	61479	59109	63149	63494
2014-10-12 22:45:29.519	61480	59114	63153	63479
2014-10-12 22:45:29.525	61474	59111	63146	63466
2014-10-12 22:45:29.529	61468	59115	63141	63468
2014-10-12 22:45:29.535	61463	59105	63137	63482
2014-10-12 22:45:29.539	61466	59104	63148	63508
2014-10-12 22:45:29.545	61481	59112	63137	63517
2014-10-12 22:45:29.549	61476	59110	63135	63515
2014-10-12 22:45:29.555	61481	59117	63161	63507
2014-10-12 22:45:29.559	61480	59118	63169	63492
2014-10-12 22:45:29.565	61469	59109	63166	63498
2014-10-12 22:45:29.569	61480	59120	63157	63512
2014-10-12 22:45:29.575	61479	59125	63148	63514
2014-10-12 22:45:29.579	61471	59100	63144	63501
2014-10-12 22:45:29.585	61480	59097	63143	63474
2014-10-12 22:45:29.589	61482	59117	63134	63447
2014-10-12 22:45:29.595	61477	59112	63136	63417
2014-10-12 22:45:29.599	61469	59104	63140	63397
2014-10-12 22:45:29.605	61472	59114	63141	63415
2014-10-12 22:45:29.609	61477	59120	63155	63471
2014-10-12 22:45:29.615	61470	59111	63152	63510
2014-10-12 22:45:29.619	61475	59100	63166	63510
2014-10-12 22:45:29.625	61470	59110	63168	63511
2014-10-12 22:45:29.630	61464	59101	63153	63496
2014-10-12 22:45:29.634	61483	59103	63169	63472
2014-10-12 22:45:29.640	61477	59117	63165	63500
2014-10-12 22:45:29.644	61462	59101	63169	63537
2014-10-12 22:45:29.650	61472	59102	63178	63526
2014-10-12 22:45:29.654	61487	59110	63172	63495
2014-10-12 22:45:29.660	61483	59110	63165	63483
2014-10-12 22:45:29.664	61476	59095	63143	63484
2014-10-12 22:45:29.670	61475	59107	63145	63472
2014-10-12 22:45:29.674	61459	59117	63163	63490
2014-10-12 22:45:29.680	61472	59094	63173	63529
2014-10-12 22:45:29.684	61488	59116	63179	63549
2014-10-12 22:45:29.690	61482	59118	63171	63555
2014-10-12 22:45:29.694	61479	59080	63155	63524
2014-10-12 22:45:29.700	61479	59099	63155	63488
2014-10-12 22:45:29.704	61486	59117	63161	63490
2014-10-12 22:45:29.710	61469	59091	63153	63507
2014-10-12 22:45:29.714	61467	59091	63146	63511
2014-10-12 22:45:29.720	61481	59107	63138	63470
2014-10-12 22:45:29.724	61477	59107	63145	63411
2014-10-12 22:45:29.730	61475	59106	63149	63397
2014-10-12 22:45:29.734	61474	59105	63133	63420
2014-10-12 22:45:29.740	61482	59107	63143	63444
2014-10-12 22:45:29.744	61481	59098	63158	63464
2014-10-12 22:45:29.750	61476	59095	63162	63490
2014-10-12 22:45:29.755	61475	59111	63165	63501
2014-10-12 22:45:29.759	61469	59115	63141	63492
2014-10-12 22:45:29.765	61468	59111	63125	63518
2014-10-12 22:45:29.769	61476	59114	63140	63553
2014-10-12 22:45:29.775	61484	59117	63154	63568
2014-10-12 22:45:29.779	61469	59095	63167	63590
2014-10-12 22:45:29.785	61466	59107	63169	63571
2014-10-12 22:45:29.789	61480	59117	63163	63516
2014-10-12 22:45:29.795	61478	59091	63175	63474
2014-10-12 22:45:29.799	61478	59120	63162	63442
2014-10-12 22:45:29.805	61482	59125	63119	63446
2014-10-12 22:45:29.809	61480	59095	63118	63447
2014-10-12 22:45:29.815	61473	59106	63132	63442
2014-10-12 22:45:29.819	61465	59112	63141	63450
2014-10-12 22:45:29.825	61462	59103	63163	63451
2014-10-12 22:45:29.829	61473	59105	63174	63475
2014-10-12 22:45:29.835	61484	59117	63171	63496
2014-10-12 22:45:29.839	61480	59102	63173	63530
2014-10-12 22:45:29.845	61489	59097	63180	63587
2014-10-12 22:45:29.849	61488	59109	63187	63598
2014-10-12 22:45:29.855	61475	59099	63181	63576
2014-10-12 22:45:29.859	61481	59099	63169	63520
2014-10-12 22:45:29.865	61481	59104	63163	63478
2014-10-12 22:45:29.869	61473	59096	63159	63477
2014-10-12 22:45:29.875	61477	59085	63168	63471
2014-10-12 22:45:29.880	61484	59093	63171	63478
2014-10-12 22:45:29.884	61479	59106	63149	63460
2014-10-12 22:45:29.890	61477	59106	63151	63431
2014-10-12 22:45:29.894	61472	59108	63163	63424
2014-10-12 22:45:29.900	61475	59097	63166	63433
2014-10-12 22:45:29.904	61477	59090	63175	63460
2014-10-12 22:45:29.910	61469	59102	63164	63500
2014-10-12 22:45:29.914	61486	59104	63168	63546
2014-10-12 22:45:29.920	61480	59100	63176	63542
2014-10-12 22:45:29.924	61469	59096	63165	63536
2014-10-12 22:45:29.930	61475	59090	63169	63548
2014-10-12 22:45:29.934	61464	59091	63171	63551
2014-10-12 22:45:29.940	61476	59096	63156	63583
2014-10-12 22:45:29.944	61481	59093	63135	63556
2014-10-12 22:45:29.950	61477	59088	63149	63471
2014-10-12 22:45:29.954	61473	59099	63157	63416
2014-10-12 22:45:29.960	61463	59104	63140	63375
2014-10-12 22:45:29.964	61471	59103	63147	63372
2014-10-12 22:45:29.970	61468	59099	63140	63436
2014-10-12 22:45:29.974	61476	59106	63139	63508
2014-10-12 22:45:29.980	61475	59102	63165	63538
2014-10-12 22:45:29.984	61471	59086	63166	63546
2014-10-12 22:45:29.990	61481	59111	63178	63561
2014-10-12 22:45:29.994	61468	59113	63198	63561
[truncated: 10,200 more rows]
