# Supplementary material for: Seismic monitoring of small alpine rockfalls – validity, precision and limitations
Source: Copernicus journal article supplement (doi:10.5194/esurf-5-653-2017), 2017-10-16
Supplement: Supplementary file 2 [file esurf-5-653-2017-supplement.zip › event_2.txt]

Time	LAU02	LAU03	LAU04	LAU05
2014-10-15 01:58:02.005	59835	60495	61990	63531
2014-10-15 01:58:02.009	59838	60519	61975	63556
2014-10-15 01:58:02.015	59836	60507	61980	63552
2014-10-15 01:58:02.019	59834	60493	61983	63551
2014-10-15 01:58:02.025	59833	60502	61981	63554
2014-10-15 01:58:02.029	59829	60500	61996	63557
2014-10-15 01:58:02.035	59838	60506	61999	63565
2014-10-15 01:58:02.039	59840	60494	62007	63574
2014-10-15 01:58:02.045	59829	60494	62028	63589
2014-10-15 01:58:02.049	59824	60509	62011	63622
2014-10-15 01:58:02.055	59833	60506	62001	63643
2014-10-15 01:58:02.059	59839	60498	62010	63646
2014-10-15 01:58:02.065	59831	60493	62008	63658
2014-10-15 01:58:02.069	59829	60505	62005	63656
2014-10-15 01:58:02.075	59830	60499	62003	63625
2014-10-15 01:58:02.079	59829	60488	61995	63588
2014-10-15 01:58:02.085	59827	60506	61989	63550
2014-10-15 01:58:02.089	59827	60513	61978	63528
2014-10-15 01:58:02.095	59829	60496	61962	63528
2014-10-15 01:58:02.099	59828	60487	61972	63536
2014-10-15 01:58:02.105	59834	60490	61981	63544
2014-10-15 01:58:02.109	59830	60492	61967	63539
2014-10-15 01:58:02.115	59819	60494	61975	63544
2014-10-15 01:58:02.119	59826	60498	61979	63536
2014-10-15 01:58:02.125	59834	60501	61973	63522
2014-10-15 01:58:02.130	59828	60489	61983	63546
2014-10-15 01:58:02.134	59821	60487	61985	63585
2014-10-15 01:58:02.140	59820	60496	61988	63651
2014-10-15 01:58:02.144	59823	60488	61984	63691
2014-10-15 01:58:02.150	59816	60492	61981	63656
2014-10-15 01:58:02.154	59825	60495	61972	63631
2014-10-15 01:58:02.160	59832	60490	61959	63616
2014-10-15 01:58:02.164	59813	60487	61977	63583
2014-10-15 01:58:02.170	59825	60487	61982	63550
2014-10-15 01:58:02.174	59828	60498	61961	63541
2014-10-15 01:58:02.180	59818	60493	61958	63556
2014-10-15 01:58:02.184	59830	60496	61974	63564
2014-10-15 01:58:02.190	59831	60502	61979	63555
2014-10-15 01:58:02.194	59824	60500	61974	63547
2014-10-15 01:58:02.200	59806	60484	61978	63545
2014-10-15 01:58:02.204	59821	60476	61972	63528
2014-10-15 01:58:02.210	59842	60492	61980	63516
2014-10-15 01:58:02.214	59818	60474	61983	63537
2014-10-15 01:58:02.220	59821	60475	61976	63584
2014-10-15 01:58:02.224	59830	60493	61976	63597
2014-10-15 01:58:02.230	59828	60474	61981	63583
2014-10-15 01:58:02.234	59823	60483	61985	63595
2014-10-15 01:58:02.240	59808	60487	61962	63588
2014-10-15 01:58:02.244	59816	60480	61972	63582
2014-10-15 01:58:02.250	59821	60493	61975	63600
2014-10-15 01:58:02.255	59820	60488	61953	63618
2014-10-15 01:58:02.259	59823	60491	61965	63631
2014-10-15 01:58:02.265	59822	60493	61956	63611
2014-10-15 01:58:02.269	59825	60487	61940	63596
2014-10-15 01:58:02.275	59816	60496	61962	63569
2014-10-15 01:58:02.279	59819	60491	61991	63527
2014-10-15 01:58:02.285	59828	60477	61985	63538
2014-10-15 01:58:02.289	59824	60483	61968	63543
2014-10-15 01:58:02.295	59828	60486	61966	63527
2014-10-15 01:58:02.299	59819	60483	61965	63535
2014-10-15 01:58:02.305	59811	60493	61968	63527
2014-10-15 01:58:02.309	59824	60480	61970	63515
2014-10-15 01:58:02.315	59833	60479	61977	63515
2014-10-15 01:58:02.319	59818	60499	61983	63521
2014-10-15 01:58:02.325	59809	60490	61975	63546
2014-10-15 01:58:02.329	59823	60482	61973	63578
2014-10-15 01:58:02.335	59808	60480	61975	63604
2014-10-15 01:58:02.339	59814	60485	61971	63621
2014-10-15 01:58:02.345	59827	60490	61978	63631
2014-10-15 01:58:02.349	59815	60495	61967	63642
2014-10-15 01:58:02.355	59814	60489	61967	63631
2014-10-15 01:58:02.359	59817	60473	61994	63608
2014-10-15 01:58:02.365	59820	60495	61996	63598
2014-10-15 01:58:02.369	59813	60485	61997	63577
2014-10-15 01:58:02.375	59817	60471	61988	63566
2014-10-15 01:58:02.380	59815	60490	61987	63587
2014-10-15 01:58:02.384	59814	60488	61996	63588
2014-10-15 01:58:02.390	59815	60483	61968	63559
2014-10-15 01:58:02.394	59813	60479	61952	63545
2014-10-15 01:58:02.400	59828	60483	61939	63526
2014-10-15 01:58:02.404	59816	60481	61927	63508
2014-10-15 01:58:02.410	59814	60477	61935	63503
2014-10-15 01:58:02.414	59821	60484	61952	63477
2014-10-15 01:58:02.420	59804	60483	61974	63479
2014-10-15 01:58:02.424	59813	60490	61961	63519
2014-10-15 01:58:02.430	59822	60490	61953	63540
2014-10-15 01:58:02.434	59814	60480	61962	63562
2014-10-15 01:58:02.440	59807	60478	61954	63593
2014-10-15 01:58:02.444	59800	60480	61938	63598
2014-10-15 01:58:02.450	59805	60479	61954	63597
2014-10-15 01:58:02.454	59809	60470	61968	63613
2014-10-15 01:58:02.460	59811	60479	61935	63615
2014-10-15 01:58:02.464	59820	60481	61939	63619
2014-10-15 01:58:02.470	59823	60480	61937	63636
2014-10-15 01:58:02.474	59818	60485	61936	63622
2014-10-15 01:58:02.480	59815	60472	61967	63583
2014-10-15 01:58:02.484	59796	60478	61965	63552
2014-10-15 01:58:02.490	59806	60484	61965	63532
2014-10-15 01:58:02.494	59820	60470	61951	63515
2014-10-15 01:58:02.500	59809	60469	61954	63506
2014-10-15 01:58:02.505	59817	60477	61956	63503
2014-10-15 01:58:02.509	59812	60481	61920	63497
2014-10-15 01:58:02.515	59808	60469	61931	63506
2014-10-15 01:58:02.519	59816	60462	61947	63519
2014-10-15 01:58:02.525	59801	60475	61933	63531
2014-10-15 01:58:02.529	59793	60471	61926	63563
2014-10-15 01:58:02.535	59804	60457	61940	63558
2014-10-15 01:58:02.539	59817	60474	61948	63547
2014-10-15 01:58:02.545	59810	60477	61947	63577
2014-10-15 01:58:02.549	59799	60469	61956	63578
2014-10-15 01:58:02.555	59814	60469	61953	63573
2014-10-15 01:58:02.559	59813	60469	61977	63574
2014-10-15 01:58:02.565	59805	60476	61986	63561
2014-10-15 01:58:02.569	59808	60461	61965	63578
2014-10-15 01:58:02.575	59795	60464	61968	63572
2014-10-15 01:58:02.579	59798	60481	61950	63532
2014-10-15 01:58:02.585	59799	60463	61942	63526
2014-10-15 01:58:02.589	59800	60468	61930	63537
2014-10-15 01:58:02.595	59809	60470	61918	63557
2014-10-15 01:58:02.599	59799	60464	61925	63573
2014-10-15 01:58:02.605	59805	60477	61904	63570
2014-10-15 01:58:02.609	59807	60480	61918	63561
2014-10-15 01:58:02.615	59798	60479	61913	63520
2014-10-15 01:58:02.619	59806	60478	61918	63513
2014-10-15 01:58:02.625	59800	60478	61961	63553
2014-10-15 01:58:02.630	59787	60491	61960	63573
2014-10-15 01:58:02.634	59791	60478	61959	63593
2014-10-15 01:58:02.640	59802	60464	61938	63582
2014-10-15 01:58:02.644	59808	60488	61992	63526
2014-10-15 01:58:02.650	59800	60477	61998	63520
2014-10-15 01:58:02.654	59794	60461	61906	63529
2014-10-15 01:58:02.660	59788	60479	61936	63532
2014-10-15 01:58:02.664	59787	60469	61988	63541
2014-10-15 01:58:02.670	59805	60465	61978	63541
2014-10-15 01:58:02.674	59803	60475	61920	63559
2014-10-15 01:58:02.680	59796	60473	61923	63566
2014-10-15 01:58:02.684	59796	60478	61941	63552
2014-10-15 01:58:02.690	59792	60469	61935	63551
2014-10-15 01:58:02.694	59804	60463	61938	63541
2014-10-15 01:58:02.700	59806	60474	61888	63521
2014-10-15 01:58:02.704	59796	60473	61948	63521
2014-10-15 01:58:02.710	59794	60470	61975	63537
2014-10-15 01:58:02.714	59796	60476	61927	63546
2014-10-15 01:58:02.720	59799	60476	61932	63570
2014-10-15 01:58:02.724	59789	60469	61921	63589
2014-10-15 01:58:02.730	59788	60469	61946	63577
2014-10-15 01:58:02.734	59797	60470	61955	63572
2014-10-15 01:58:02.740	59795	60473	61943	63568
2014-10-15 01:58:02.744	59790	60479	61939	63553
2014-10-15 01:58:02.750	59799	60463	61925	63549
2014-10-15 01:58:02.755	59804	60467	61949	63556
2014-10-15 01:58:02.759	59793	60481	61952	63561
2014-10-15 01:58:02.765	59802	60459	61939	63553
2014-10-15 01:58:02.769	59801	60467	61940	63545
2014-10-15 01:58:02.775	59795	60480	61944	63523
2014-10-15 01:58:02.779	59811	60462	61955	63483
2014-10-15 01:58:02.785	59801	60464	61934	63476
2014-10-15 01:58:02.789	59787	60474	61921	63489
2014-10-15 01:58:02.795	59792	60474	61931	63483
2014-10-15 01:58:02.799	59799	60479	61925	63492
2014-10-15 01:58:02.805	59792	60474	61924	63527
2014-10-15 01:58:02.809	59788	60468	61911	63549
2014-10-15 01:58:02.815	59798	60466	61920	63559
2014-10-15 01:58:02.819	59786	60454	61939	63548
2014-10-15 01:58:02.825	59785	60458	61932	63527
2014-10-15 01:58:02.829	59794	60466	61944	63556
2014-10-15 01:58:02.835	59789	60463	61938	63586
2014-10-15 01:58:02.839	59799	60466	61933	63588
2014-10-15 01:58:02.845	59792	60458	61952	63597
2014-10-15 01:58:02.849	59789	60454	61946	63604
2014-10-15 01:58:02.855	59801	60467	61933	63596
2014-10-15 01:58:02.859	59791	60466	61942	63565
2014-10-15 01:58:02.865	59781	60456	61945	63543
2014-10-15 01:58:02.869	59778	60457	61925	63526
2014-10-15 01:58:02.875	59779	60466	61925	63523
2014-10-15 01:58:02.880	59785	60463	61921	63522
2014-10-15 01:58:02.884	59789	60456	61920	63511
2014-10-15 01:58:02.890	59784	60466	61911	63511
2014-10-15 01:58:02.894	59773	60467	61899	63480
2014-10-15 01:58:02.900	59786	60459	61922	63453
2014-10-15 01:58:02.904	59781	60457	61918	63458
2014-10-15 01:58:02.910	59774	60454	61921	63468
2014-10-15 01:58:02.914	59780	60452	61922	63496
2014-10-15 01:58:02.920	59781	60459	61939	63533
2014-10-15 01:58:02.924	59797	60463	61932	63554
2014-10-15 01:58:02.930	59779	60462	61928	63545
2014-10-15 01:58:02.934	59770	60469	61988	63555
2014-10-15 01:58:02.940	59793	60460	61910	63569
2014-10-15 01:58:02.944	59787	60461	61912	63575
2014-10-15 01:58:02.950	59785	60474	61981	63602
2014-10-15 01:58:02.954	59773	60455	61934	63611
2014-10-15 01:58:02.960	59777	60454	61943	63589
2014-10-15 01:58:02.964	59791	60458	61899	63566
2014-10-15 01:58:02.970	59777	60463	61918	63553
2014-10-15 01:58:02.974	59788	60477	61935	63524
2014-10-15 01:58:02.980	59789	60461	61871	63508
2014-10-15 01:58:02.984	59775	60458	61918	63504
2014-10-15 01:58:02.990	59776	60460	61925	63479
2014-10-15 01:58:02.994	59777	60460	61911	63479
2014-10-15 01:58:03.000	59781	60465	61917	63488
2014-10-15 01:58:03.005	59783	60457	61912	63492
2014-10-15 01:58:03.009	59774	60457	61923	63515
2014-10-15 01:58:03.015	59779	60458	61922	63553
2014-10-15 01:58:03.019	59785	60456	61927	63565
2014-10-15 01:58:03.025	59781	60448	61917	63548
2014-10-15 01:58:03.029	59785	60450	61935	63539
2014-10-15 01:58:03.035	59774	60462	61953	63534
2014-10-15 01:58:03.039	59778	60455	61919	63521
2014-10-15 01:58:03.045	59784	60461	61928	63503
2014-10-15 01:58:03.049	59768	60461	61959	63507
2014-10-15 01:58:03.055	59788	60447	61942	63517
2014-10-15 01:58:03.059	59781	60464	61928	63510
2014-10-15 01:58:03.065	59764	60458	61935	63493
2014-10-15 01:58:03.069	59781	60449	61914	63498
2014-10-15 01:58:03.075	59776	60461	61891	63517
2014-10-15 01:58:03.079	59769	60453	61889	63520
2014-10-15 01:58:03.085	59765	60441	61895	63529
2014-10-15 01:58:03.089	59770	60451	61906	63548
2014-10-15 01:58:03.095	59774	60456	61896	63569
2014-10-15 01:58:03.099	59768	60443	61893	63550
2014-10-15 01:58:03.105	59772	60448	61912	63546
2014-10-15 01:58:03.109	59769	60455	61911	63552
2014-10-15 01:58:03.115	59768	60456	61901	63518
2014-10-15 01:58:03.119	59765	60448	61904	63515
2014-10-15 01:58:03.125	59765	60446	61908	63502
2014-10-15 01:58:03.130	59770	60454	61909	63512
2014-10-15 01:58:03.134	59763	60439	61903	63539
2014-10-15 01:58:03.140	59760	60445	61900	63517
2014-10-15 01:58:03.144	59780	60457	61911	63514
2014-10-15 01:58:03.150	59778	60444	61909	63506
2014-10-15 01:58:03.154	59761	60443	61903	63496
2014-10-15 01:58:03.160	59777	60448	61907	63487
2014-10-15 01:58:03.164	59767	60441	61892	63464
2014-10-15 01:58:03.170	59761	60440	61893	63477
2014-10-15 01:58:03.174	59769	60464	61913	63499
2014-10-15 01:58:03.180	59753	60464	61916	63506
2014-10-15 01:58:03.184	59772	60438	61919	63523
2014-10-15 01:58:03.190	59784	60445	61915	63520
2014-10-15 01:58:03.194	59770	60453	61917	63522
2014-10-15 01:58:03.200	59764	60450	61935	63547
2014-10-15 01:58:03.204	59763	60451	61918	63539
2014-10-15 01:58:03.210	59778	60446	61898	63524
2014-10-15 01:58:03.214	59767	60447	61903	63529
2014-10-15 01:58:03.220	59756	60447	61881	63548
2014-10-15 01:58:03.224	59768	60444	61865	63568
2014-10-15 01:58:03.230	59752	60446	61872	63556
2014-10-15 01:58:03.234	59754	60449	61895	63542
2014-10-15 01:58:03.240	59763	60445	61923	63517
2014-10-15 01:58:03.244	59753	60442	61908	63489
2014-10-15 01:58:03.250	59763	60448	61900	63476
2014-10-15 01:58:03.255	59751	60447	61900	63449
2014-10-15 01:58:03.259	59749	60443	61891	63461
2014-10-15 01:58:03.265	59760	60441	61902	63482
2014-10-15 01:58:03.269	59748	60442	61894	63467
2014-10-15 01:58:03.275	59747	60440	61900	63474
2014-10-15 01:58:03.279	59754	60434	61911	63480
2014-10-15 01:58:03.285	59763	60439	61899	63483
2014-10-15 01:58:03.289	59765	60440	61904	63492
2014-10-15 01:58:03.295	59765	60439	61922	63504
2014-10-15 01:58:03.299	59755	60460	61919	63544
2014-10-15 01:58:03.305	59750	60456	61902	63570
2014-10-15 01:58:03.309	59762	60432	61903	63581
2014-10-15 01:58:03.315	59749	60435	61897	63568
2014-10-15 01:58:03.319	59748	60442	61895	63544
2014-10-15 01:58:03.325	59756	60437	61902	63547
2014-10-15 01:58:03.329	59752	60429	61872	63537
2014-10-15 01:58:03.335	59751	60443	61883	63513
2014-10-15 01:58:03.339	59731	60457	61891	63495
2014-10-15 01:58:03.345	59738	60442	61866	63466
2014-10-15 01:58:03.349	59766	60436	61903	63451
2014-10-15 01:58:03.355	59753	60442	61888	63455
2014-10-15 01:58:03.359	59741	60452	61846	63458
2014-10-15 01:58:03.365	59752	60447	61881	63452
2014-10-15 01:58:03.369	59757	60433	61900	63441
2014-10-15 01:58:03.375	59752	60445	61895	63459
2014-10-15 01:58:03.380	59753	60450	61893	63493
2014-10-15 01:58:03.384	59762	60452	61898	63516
2014-10-15 01:58:03.390	59754	60446	61910	63532
2014-10-15 01:58:03.394	59746	60435	61911	63535
2014-10-15 01:58:03.400	59742	60443	61917	63532
2014-10-15 01:58:03.404	59730	60438	61921	63531
2014-10-15 01:58:03.410	59743	60436	61916	63526
2014-10-15 01:58:03.414	59752	60443	61895	63527
2014-10-15 01:58:03.420	59739	60431	61878	63532
2014-10-15 01:58:03.424	59746	60431	61867	63535
2014-10-15 01:58:03.430	59753	60438	61863	63531
2014-10-15 01:58:03.434	59745	60436	61880	63513
2014-10-15 01:58:03.440	59737	60440	61880	63499
2014-10-15 01:58:03.444	59741	60447	61876	63471
2014-10-15 01:58:03.450	59744	60442	61885	63434
2014-10-15 01:58:03.454	59745	60443	61867	63428
2014-10-15 01:58:03.460	59763	60451	61865	63428
2014-10-15 01:58:03.464	59745	60444	61890	63440
2014-10-15 01:58:03.470	59736	60437	61892	63467
2014-10-15 01:58:03.474	59748	60433	61891	63465
2014-10-15 01:58:03.480	59732	60434	61882	63466
2014-10-15 01:58:03.484	59748	60439	61876	63484
2014-10-15 01:58:03.490	59747	60437	61888	63492
2014-10-15 01:58:03.494	59732	60435	61894	63525
2014-10-15 01:58:03.500	59753	60442	61900	63576
2014-10-15 01:58:03.505	59753	60451	61891	63606
2014-10-15 01:58:03.509	59743	60438	61885	63629
2014-10-15 01:58:03.515	59738	60431	61900	63637
2014-10-15 01:58:03.519	59739	60435	61900	63613
2014-10-15 01:58:03.525	59744	60417	61887	63578
2014-10-15 01:58:03.529	59737	60435	61886	63515
2014-10-15 01:58:03.535	59746	60450	61893	63443
2014-10-15 01:58:03.539	59749	60434	61885	63403
2014-10-15 01:58:03.545	59741	60439	61874	63366
2014-10-15 01:58:03.549	59734	60438	61884	63356
2014-10-15 01:58:03.555	59731	60431	61890	63388
2014-10-15 01:58:03.559	59749	60432	61866	63409
2014-10-15 01:58:03.565	59740	60434	61852	63428
2014-10-15 01:58:03.569	59735	60439	61860	63441
2014-10-15 01:58:03.575	59754	60441	61868	63455
2014-10-15 01:58:03.579	59747	60443	61881	63503
2014-10-15 01:58:03.585	59737	60444	61879	63540
2014-10-15 01:58:03.589	59732	60456	61885	63568
2014-10-15 01:58:03.595	59741	60443	61908	63623
2014-10-15 01:58:03.599	59748	60427	61905	63638
2014-10-15 01:58:03.605	59730	60443	61882	63619
2014-10-15 01:58:03.609	59725	60437	61884	63609
2014-10-15 01:58:03.615	59741	60436	61894	63578
2014-10-15 01:58:03.619	59748	60444	61880	63545
2014-10-15 01:58:03.625	59739	60437	61876	63520
2014-10-15 01:58:03.630	59746	60439	61865	63500
2014-10-15 01:58:03.634	59747	60440	61861	63473
2014-10-15 01:58:03.640	59746	60446	61884	63432
2014-10-15 01:58:03.644	59746	60452	61887	63406
2014-10-15 01:58:03.650	59738	60444	61878	63363
2014-10-15 01:58:03.654	59745	60435	61881	63351
2014-10-15 01:58:03.660	59738	60443	61888	63392
2014-10-15 01:58:03.664	59750	60449	61883	63398
2014-10-15 01:58:03.670	59762	60434	61896	63431
2014-10-15 01:58:03.674	59733	60434	61919	63485
2014-10-15 01:58:03.680	59737	60437	61907	63496
2014-10-15 01:58:03.684	59744	60434	61887	63535
2014-10-15 01:58:03.690	59745	60448	61874	63570
2014-10-15 01:58:03.694	59750	60442	61883	63583
2014-10-15 01:58:03.700	59732	60439	61888	63628
2014-10-15 01:58:03.704	59741	60448	61868	63642
2014-10-15 01:58:03.710	59741	60434	61862	63602
2014-10-15 01:58:03.714	59742	60442	61855	63557
2014-10-15 01:58:03.720	59756	60453	61865	63535
2014-10-15 01:58:03.724	59742	60442	61871	63507
2014-10-15 01:58:03.730	59749	60446	61857	63469
2014-10-15 01:58:03.734	59756	60450	61872	63449
2014-10-15 01:58:03.740	59733	60446	61867	63424
2014-10-15 01:58:03.744	59743	60436	61857	63409
2014-10-15 01:58:03.750	59748	60430	61884	63407
2014-10-15 01:58:03.755	59736	60450	61900	63386
2014-10-15 01:58:03.759	59758	60438	61887	63399
2014-10-15 01:58:03.765	59743	60433	61882	63440
2014-10-15 01:58:03.769	59724	60449	61884	63469
2014-10-15 01:58:03.775	59740	60425	61881	63497
2014-10-15 01:58:03.779	59743	60436	61881	63519
2014-10-15 01:58:03.785	59741	60455	61874	63556
2014-10-15 01:58:03.789	59724	60441	61869	63579
2014-10-15 01:58:03.795	59743	60442	61878	63591
2014-10-15 01:58:03.799	59759	60440	61876	63619
2014-10-15 01:58:03.805	59730	60445	61870	63589
2014-10-15 01:58:03.809	59738	60435	61888	63552
2014-10-15 01:58:03.815	59751	60433	61895	63543
2014-10-15 01:58:03.819	59739	60446	61885	63496
2014-10-15 01:58:03.825	59733	60444	61894	63454
2014-10-15 01:58:03.829	59745	60437	61894	63423
2014-10-15 01:58:03.835	59752	60435	61886	63403
2014-10-15 01:58:03.839	59737	60453	61880	63412
2014-10-15 01:58:03.845	59734	60441	61878	63435
2014-10-15 01:58:03.849	59738	60430	61877	63451
2014-10-15 01:58:03.855	59740	60443	61877	63457
2014-10-15 01:58:03.859	59753	60425	61880	63479
2014-10-15 01:58:03.865	59748	60432	61872	63508
2014-10-15 01:58:03.869	59746	60448	61878	63552
2014-10-15 01:58:03.875	59760	60430	61870	63561
2014-10-15 01:58:03.880	59750	60441	61870	63544
2014-10-15 01:58:03.884	59745	60457	61897	63547
2014-10-15 01:58:03.890	59743	60444	61891	63527
2014-10-15 01:58:03.894	59742	60434	61880	63515
2014-10-15 01:58:03.900	59747	60434	61885	63519
2014-10-15 01:58:03.904	59742	60445	61889	63530
2014-10-15 01:58:03.910	59743	60451	61886	63547
2014-10-15 01:58:03.914	59748	60441	61892	63522
2014-10-15 01:58:03.920	59750	60442	61908	63502
2014-10-15 01:58:03.924	59746	60441	61896	63506
2014-10-15 01:58:03.930	59753	60441	61896	63492
2014-10-15 01:58:03.934	59758	60440	61894	63477
2014-10-15 01:58:03.940	59746	60436	61865	63467
2014-10-15 01:58:03.944	59751	60438	61867	63457
2014-10-15 01:58:03.950	59753	60437	61871	63446
2014-10-15 01:58:03.954	59752	60452	61868	63420
2014-10-15 01:58:03.960	59756	60450	61882	63405
2014-10-15 01:58:03.964	59752	60449	61873	63414
2014-10-15 01:58:03.970	59756	60455	61861	63443
2014-10-15 01:58:03.974	59757	60436	61883	63482
2014-10-15 01:58:03.980	59759	60453	61889	63520
2014-10-15 01:58:03.984	59757	60457	61890	63576
2014-10-15 01:58:03.990	59758	60441	61914	63620
2014-10-15 01:58:03.994	59766	60459	61902	63626
2014-10-15 01:58:04.000	59750	60456	61900	63620
2014-10-15 01:58:04.005	59750	60445	61922	63589
2014-10-15 01:58:04.009	59758	60459	61904	63538
2014-10-15 01:58:04.015	59753	60458	61910	63525
2014-10-15 01:58:04.019	59748	60448	61913	63520
2014-10-15 01:58:04.025	59747	60456	61885	63480
2014-10-15 01:58:04.029	59765	60443	61889	63461
2014-10-15 01:58:04.035	59757	60438	61892	63441
2014-10-15 01:58:04.039	59750	60464	61868	63413
2014-10-15 01:58:04.045	59763	60453	61872	63418
2014-10-15 01:58:04.049	59753	60447	61887	63429
2014-10-15 01:58:04.055	59760	60457	61878	63465
2014-10-15 01:58:04.059	59762	60455	61888	63497
2014-10-15 01:58:04.065	59747	60454	61900	63505
2014-10-15 01:58:04.069	59756	60453	61890	63533
2014-10-15 01:58:04.075	59764	60450	61892	63552
2014-10-15 01:58:04.079	59761	60443	61892	63558
2014-10-15 01:58:04.085	59764	60452	61907	63564
2014-10-15 01:58:04.089	59762	60450	61923	63561
2014-10-15 01:58:04.095	59764	60445	61900	63561
2014-10-15 01:58:04.099	59766	60459	61897	63554
2014-10-15 01:58:04.105	59762	60454	61901	63541
2014-10-15 01:58:04.109	59780	60450	61887	63522
2014-10-15 01:58:04.115	59770	60449	61885	63510
2014-10-15 01:58:04.119	59751	60446	61898	63492
2014-10-15 01:58:04.125	59766	60460	61916	63462
2014-10-15 01:58:04.130	59775	60464	61908	63469
2014-10-15 01:58:04.134	59777	60465	61902	63478
2014-10-15 01:58:04.140	59761	60466	61914	63479
2014-10-15 01:58:04.144	59756	60459	61925	63498
2014-10-15 01:58:04.150	59768	60446	61921	63504
2014-10-15 01:58:04.154	59765	60446	61895	63497
2014-10-15 01:58:04.160	59768	60462	61900	63479
2014-10-15 01:58:04.164	59765	60464	61910	63485
2014-10-15 01:58:04.170	59768	60457	61891	63512
2014-10-15 01:58:04.174	59763	60460	61882	63514
2014-10-15 01:58:04.180	59758	60456	61875	63513
2014-10-15 01:58:04.184	59774	60448	61890	63521
2014-10-15 01:58:04.190	59769	60455	61902	63519
2014-10-15 01:58:04.194	59763	60459	61890	63514
2014-10-15 01:58:04.200	59761	60456	61894	63534
2014-10-15 01:58:04.204	59762	60452	61883	63554
2014-10-15 01:58:04.210	59767	60451	61893	63564
2014-10-15 01:58:04.214	59766	60462	61934	63574
2014-10-15 01:58:04.220	59776	60460	61916	63561
2014-10-15 01:58:04.224	59779	60449	61899	63552
2014-10-15 01:58:04.230	59778	60457	61920	63538
2014-10-15 01:58:04.234	59773	60456	61918	63522
2014-10-15 01:58:04.240	59773	60453	61914	63509
2014-10-15 01:58:04.244	59783	60458	61917	63463
2014-10-15 01:58:04.250	59770	60456	61918	63431
2014-10-15 01:58:04.255	59773	60459	61913	63412
2014-10-15 01:58:04.259	59783	60456	61897	63427
2014-10-15 01:58:04.265	59772	60450	61895	63462
2014-10-15 01:58:04.269	59766	60450	61903	63485
2014-10-15 01:58:04.275	59769	60450	61901	63541
2014-10-15 01:58:04.279	59775	60460	61901	63572
2014-10-15 01:58:04.285	59771	60452	61915	63562
2014-10-15 01:58:04.289	59773	60443	61922	63567
2014-10-15 01:58:04.295	59777	60460	61918	63603
2014-10-15 01:58:04.299	59772	60465	61912	63593
2014-10-15 01:58:04.305	59774	60461	61920	63554
2014-10-15 01:58:04.309	59774	60459	61923	63568
2014-10-15 01:58:04.315	59770	60457	61904	63551
2014-10-15 01:58:04.319	59761	60458	61905	63537
2014-10-15 01:58:04.325	59763	60448	61902	63560
2014-10-15 01:58:04.329	59786	60452	61894	63557
2014-10-15 01:58:04.335	59782	60454	61904	63548
2014-10-15 01:58:04.339	59763	60445	61897	63514
2014-10-15 01:58:04.345	59767	60458	61908	63448
2014-10-15 01:58:04.349	59780	60464	61921	63419
2014-10-15 01:58:04.355	59782	60460	61895	63440
2014-10-15 01:58:04.359	59771	60464	61898	63446
2014-10-15 01:58:04.365	59781	60467	61909	63465
2014-10-15 01:58:04.369	59782	60462	61896	63526
2014-10-15 01:58:04.375	59778	60456	61907	63567
2014-10-15 01:58:04.380	59791	60471	61923	63573
2014-10-15 01:58:04.384	59787	60471	61925	63568
2014-10-15 01:58:04.390	59794	60457	61923	63573
2014-10-15 01:58:04.394	59783	60467	61924	63574
2014-10-15 01:58:04.400	59772	60463	61911	63556
2014-10-15 01:58:04.404	59796	60460	61905	63569
2014-10-15 01:58:04.410	59774	60473	61946	63580
2014-10-15 01:58:04.414	59768	60470	61937	63576
2014-10-15 01:58:04.420	59790	60465	61906	63569
2014-10-15 01:58:04.424	59782	60465	61919	63521
2014-10-15 01:58:04.430	59788	60470	61926	63489
2014-10-15 01:58:04.434	59785	60464	61933	63481
2014-10-15 01:58:04.440	59781	60467	61939	63472
2014-10-15 01:58:04.444	59793	60478	61933	63483
2014-10-15 01:58:04.450	59791	60471	61930	63495
2014-10-15 01:58:04.454	59778	60466	61930	63511
2014-10-15 01:58:04.460	59783	60471	61928	63517
2014-10-15 01:58:04.464	59788	60483	61937	63513
2014-10-15 01:58:04.470	59771	60458	61949	63530
2014-10-15 01:58:04.474	59779	60451	61948	63535
2014-10-15 01:58:04.480	59787	60483	61947	63560
2014-10-15 01:58:04.484	59775	60470	61935	63588
2014-10-15 01:58:04.490	59791	60466	61938	63588
2014-10-15 01:58:04.494	59790	60472	61957	63587
2014-10-15 01:58:04.500	59778	60464	61944	63558
2014-10-15 01:58:04.505	59792	60474	61917	63545
2014-10-15 01:58:04.509	59802	60465	61929	63545
2014-10-15 01:58:04.515	59785	60454	61937	63523
2014-10-15 01:58:04.519	59778	60467	61928	63495
2014-10-15 01:58:04.525	59803	60468	61935	63488
2014-10-15 01:58:04.529	59807	60468	61937	63517
2014-10-15 01:58:04.535	59784	60478	61934	63518
2014-10-15 01:58:04.539	59792	60468	61928	63532
2014-10-15 01:58:04.545	59801	60466	61926	63545
2014-10-15 01:58:04.549	59785	60478	61937	63535
2014-10-15 01:58:04.555	59786	60468	61938	63559
2014-10-15 01:58:04.559	59786	60462	61943	63576
2014-10-15 01:58:04.565	59788	60484	61946	63599
2014-10-15 01:58:04.569	59794	60480	61940	63604
2014-10-15 01:58:04.575	59792	60462	61941	63597
2014-10-15 01:58:04.579	59804	60471	61926	63589
2014-10-15 01:58:04.585	59802	60470	61913	63544
2014-10-15 01:58:04.589	59798	60476	61921	63541
2014-10-15 01:58:04.595	59802	60471	61934	63540
2014-10-15 01:58:04.599	59802	60471	61935	63524
2014-10-15 01:58:04.605	59806	60482	61928	63516
2014-10-15 01:58:04.609	59790	60467	61944	63504
2014-10-15 01:58:04.615	59796	60470	61932	63530
2014-10-15 01:58:04.619	59808	60472	61909	63537
2014-10-15 01:58:04.625	59799	60462	61942	63519
2014-10-15 01:58:04.630	59810	60465	61946	63535
2014-10-15 01:58:04.634	59807	60468	61943	63535
2014-10-15 01:58:04.640	59803	60486	61950	63511
2014-10-15 01:58:04.644	59806	60480	61928	63542
2014-10-15 01:58:04.650	59800	60464	61938	63573
2014-10-15 01:58:04.654	59802	60486	61952	63576
2014-10-15 01:58:04.660	59793	60474	61954	63588
2014-10-15 01:58:04.664	59794	60461	61950	63576
2014-10-15 01:58:04.670	59797	60481	61967	63570
2014-10-15 01:58:04.674	59801	60474	61988	63569
2014-10-15 01:58:04.680	59811	60478	61954	63551
2014-10-15 01:58:04.684	59806	60481	61985	63541
2014-10-15 01:58:04.690	59804	60467	62004	63552
2014-10-15 01:58:04.694	59813	60472	61961	63582
2014-10-15 01:58:04.700	59815	60480	61983	63589
2014-10-15 01:58:04.704	59811	60478	61950	63608
2014-10-15 01:58:04.710	59813	60484	61918	63610
2014-10-15 01:58:04.714	59798	60476	61944	63581
2014-10-15 01:58:04.720	59800	60462	61931	63586
2014-10-15 01:58:04.724	59817	60467	61966	63572
2014-10-15 01:58:04.730	59822	60467	61960	63533
2014-10-15 01:58:04.734	59813	60475	61933	63512
2014-10-15 01:58:04.740	59811	60470	61967	63504
2014-10-15 01:58:04.744	59825	60475	61955	63496
2014-10-15 01:58:04.750	59806	60498	61957	63501
2014-10-15 01:58:04.755	59798	60476	61965	63527
2014-10-15 01:58:04.759	59821	60484	61959	63527
2014-10-15 01:58:04.765	59824	60489	61982	63547
2014-10-15 01:58:04.769	59816	60474	61979	63572
2014-10-15 01:58:04.775	59809	60492	61970	63552
2014-10-15 01:58:04.779	59812	60490	61963	63570
2014-10-15 01:58:04.785	59806	60482	61948	63593
2014-10-15 01:58:04.789	59800	60477	61961	63579
2014-10-15 01:58:04.795	59809	60489	61977	63593
2014-10-15 01:58:04.799	59808	60494	61976	63606
2014-10-15 01:58:04.805	59802	60479	61983	63621
2014-10-15 01:58:04.809	59823	60491	61969	63650
2014-10-15 01:58:04.815	59837	60494	61958	63636
2014-10-15 01:58:04.819	59804	60484	61980	63608
2014-10-15 01:58:04.825	59812	60483	61964	63564
2014-10-15 01:58:04.829	59845	60480	61945	63526
2014-10-15 01:58:04.835	59831	60483	61956	63536
2014-10-15 01:58:04.839	59821	60490	61933	63534
2014-10-15 01:58:04.845	59816	60491	61933	63534
2014-10-15 01:58:04.849	59818	60485	61940	63557
2014-10-15 01:58:04.855	59821	60490	61929	63555
2014-10-15 01:58:04.859	59810	60487	61962	63551
2014-10-15 01:58:04.865	59816	60483	61964	63544
2014-10-15 01:58:04.869	59826	60490	61964	63534
2014-10-15 01:58:04.875	59824	60472	61960	63532
2014-10-15 01:58:04.880	59822	60479	61976	63536
2014-10-15 01:58:04.884	59816	60499	61991	63566
2014-10-15 01:58:04.890	59817	60488	61950	63602
2014-10-15 01:58:04.894	59828	60491	62006	63612
2014-10-15 01:58:04.900	59821	60477	61948	63612
2014-10-15 01:58:04.904	59824	60476	61983	63628
2014-10-15 01:58:04.910	59834	60505	61989	63645
2014-10-15 01:58:04.914	59823	60488	61954	63638
2014-10-15 01:58:04.920	59822	60479	62029	63636
2014-10-15 01:58:04.924	59826	60491	61863	63610
2014-10-15 01:58:04.930	59826	60487	62102	63551
2014-10-15 01:58:04.934	59827	60495	61853	63554
2014-10-15 01:58:04.940	59821	60485	62008	63574
2014-10-15 01:58:04.944	59829	60486	62025	63554
2014-10-15 01:58:04.950	59829	60498	61230	63541
2014-10-15 01:58:04.954	59823	60485	62768	63528
2014-10-15 01:58:04.960	59841	60496	62465	63528
2014-10-15 01:58:04.964	59843	60496	61108	63548
2014-10-15 01:58:04.970	59833	60481	62081	63558
2014-10-15 01:58:04.974	59832	60502	61950	63566
2014-10-15 01:58:04.980	59825	60506	62099	63564
2014-10-15 01:58:04.984	59827	60484	62145	63559
2014-10-15 01:58:04.990	59831	60481	61740	63591
2014-10-15 01:58:04.994	59828	60491	62077	63623
2014-10-15 01:58:05.000	59829	60491	61892	63622
2014-10-15 01:58:05.005	59831	60486	61945	63635
2014-10-15 01:58:05.009	59834	60499	62104	63640
2014-10-15 01:58:05.015	59831	60499	61922	63617
2014-10-15 01:58:05.019	59830	60489	61949	63591
2014-10-15 01:58:05.025	59840	60493	61957	63566
2014-10-15 01:58:05.029	59830	60504	61942	63554
2014-10-15 01:58:05.035	59833	60496	62004	63547
2014-10-15 01:58:05.039	59837	60484	62012	63574
2014-10-15 01:58:05.045	59824	60497	61993	63605
2014-10-15 01:58:05.049	59836	60490	61965	63588
2014-10-15 01:58:05.055	59833	60485	61990	63579
2014-10-15 01:58:05.059	59827	60499	61991	63565
2014-10-15 01:58:05.065	59841	60495	61960	63558
2014-10-15 01:58:05.069	59841	60491	61984	63583
2014-10-15 01:58:05.075	59824	60488	61956	63575
2014-10-15 01:58:05.079	59821	60493	61971	63571
2014-10-15 01:58:05.085	59836	60504	61967	63606
2014-10-15 01:58:05.089	59834	60489	61950	63623
2014-10-15 01:58:05.095	59821	60489	61986	63624
2014-10-15 01:58:05.099	59823	60517	61969	63606
2014-10-15 01:58:05.105	59826	60499	61959	63559
2014-10-15 01:58:05.109	59831	60485	61949	63540
2014-10-15 01:58:05.115	59836	60506	61956	63571
2014-10-15 01:58:05.119	59829	60489	61976	63615
2014-10-15 01:58:05.125	59832	60483	61977	63648
2014-10-15 01:58:05.130	59840	60499	61968	63647
2014-10-15 01:58:05.134	59830	60501	61952	63631
2014-10-15 01:58:05.140	59835	60493	61965	63613
2014-10-15 01:58:05.144	59826	60490	61946	63566
2014-10-15 01:58:05.150	59819	60495	61953	63524
2014-10-15 01:58:05.154	59837	60492	61982	63506
2014-10-15 01:58:05.160	59836	60507	61971	63508
2014-10-15 01:58:05.164	59832	60502	61991	63543
2014-10-15 01:58:05.170	59823	60489	62001	63579
2014-10-15 01:58:05.174	59827	60505	62001	63578
2014-10-15 01:58:05.180	59834	60502	62007	63570
2014-10-15 01:58:05.184	59825	60495	62007	63593
2014-10-15 01:58:05.190	59834	60501	62016	63584
2014-10-15 01:58:05.194	59839	60512	61998	63582
2014-10-15 01:58:05.200	59824	60503	61997	63624
2014-10-15 01:58:05.204	59822	60485	62006	63635
2014-10-15 01:58:05.210	59833	60503	61971	63628
2014-10-15 01:58:05.214	59829	60509	61947	63597
2014-10-15 01:58:05.220	59828	60488	61963	63568
2014-10-15 01:58:05.224	59827	60491	61952	63568
2014-10-15 01:58:05.230	59822	60510	61935	63568
2014-10-15 01:58:05.234	59840	60494	61942	63583
2014-10-15 01:58:05.240	59827	60491	61932	63586
2014-10-15 01:58:05.244	59820	60502	61940	63583
2014-10-15 01:58:05.250	59835	60482	61959	63597
2014-10-15 01:58:05.255	59827	60495	61967	63598
2014-10-15 01:58:05.259	59827	60498	61973	63591
2014-10-15 01:58:05.265	59821	60487	61969	63563
2014-10-15 01:58:05.269	59832	60504	61986	63535
2014-10-15 01:58:05.275	59832	60493	62007	63520
2014-10-15 01:58:05.279	59810	60486	62011	63527
2014-10-15 01:58:05.285	59825	60483	61998	63554
2014-10-15 01:58:05.289	59835	60485	61987	63561
2014-10-15 01:58:05.295	59828	60492	61995	63586
2014-10-15 01:58:05.299	59815	60478	61989	63610
2014-10-15 01:58:05.305	59821	60491	61977	63591
2014-10-15 01:58:05.309	59826	60495	61966	63588
2014-10-15 01:58:05.315	59818	60488	61971	63594
2014-10-15 01:58:05.319	59823	60496	61968	63596
2014-10-15 01:58:05.325	59826	60490	61947	63611
2014-10-15 01:58:05.329	59822	60487	61949	63625
2014-10-15 01:58:05.335	59820	60491	61944	63615
2014-10-15 01:58:05.339	59818	60487	61925	63603
2014-10-15 01:58:05.345	59814	60481	61949	63621
2014-10-15 01:58:05.349	59817	60479	61982	63620
2014-10-15 01:58:05.355	59822	60487	61975	63630
2014-10-15 01:58:05.359	59824	60490	61966	63641
2014-10-15 01:58:05.365	59815	60495	61962	63602
2014-10-15 01:58:05.369	59806	60496	61962	63562
2014-10-15 01:58:05.375	59815	60489	61974	63500
2014-10-15 01:58:05.380	59819	60490	61960	63439
2014-10-15 01:58:05.384	59820	60486	61946	63437
2014-10-15 01:58:05.390	59813	60489	61946	63448
2014-10-15 01:58:05.394	59814	60489	61942	63486
2014-10-15 01:58:05.400	59827	60490	61945	63538
2014-10-15 01:58:05.404	59823	60495	61960	63563
2014-10-15 01:58:05.410	59827	60488	61973	63594
2014-10-15 01:58:05.414	59823	60495	61993	63616
2014-10-15 01:58:05.420	59812	60497	62002	63628
2014-10-15 01:58:05.424	59819	60478	61994	63649
2014-10-15 01:58:05.430	59817	60477	61998	63659
2014-10-15 01:58:05.434	59814	60491	61997	63674
2014-10-15 01:58:05.440	59812	60491	62000	63686
2014-10-15 01:58:05.444	59806	60480	61999	63661
2014-10-15 01:58:05.450	59809	60477	61970	63636
2014-10-15 01:58:05.454	59808	60481	61952	63602
2014-10-15 01:58:05.460	59799	60478	61945	63525
2014-10-15 01:58:05.464	59809	60478	61940	63463
2014-10-15 01:58:05.470	59811	60478	61937	63441
2014-10-15 01:58:05.474	59806	60470	61922	63432
2014-10-15 01:58:05.480	59805	60475	61909	63464
2014-10-15 01:58:05.484	59797	60491	61926	63534
2014-10-15 01:58:05.490	59817	60485	61935	63574
2014-10-15 01:58:05.494	59817	60469	61939	63560
2014-10-15 01:58:05.500	59792	60478	61946	63537
2014-10-15 01:58:05.505	59804	60482	61928	63548
2014-10-15 01:58:05.509	59807	60475	61938	63572
2014-10-15 01:58:05.515	59802	60478	61956	63582
2014-10-15 01:58:05.519	59799	60476	61954	63589
2014-10-15 01:58:05.525	59795	60484	61957	63604
2014-10-15 01:58:05.529	59807	60475	61950	63615
2014-10-15 01:58:05.535	59811	60461	61972	63597
2014-10-15 01:58:05.539	59810	60484	61983	63564
2014-10-15 01:58:05.545	59796	60475	61957	63541
2014-10-15 01:58:05.549	59793	60456	61960	63536
2014-10-15 01:58:05.555	59803	60472	61954	63549
2014-10-15 01:58:05.559	59794	60467	61944	63560
2014-10-15 01:58:05.565	59795	60475	61951	63558
2014-10-15 01:58:05.569	59789	60480	61935	63564
2014-10-15 01:58:05.575	59791	60463	61929	63581
2014-10-15 01:58:05.579	59802	60469	61947	63571
2014-10-15 01:58:05.585	59789	60461	61953	63565
2014-10-15 01:58:05.589	59795	60468	61949	63547
2014-10-15 01:58:05.595	59800	60471	61939	63496
2014-10-15 01:58:05.599	59797	60459	61933	63486
2014-10-15 01:58:05.605	59793	60474	61946	63491
2014-10-15 01:58:05.609	59780	60462	61945	63510
2014-10-15 01:58:05.615	59791	60460	61931	63524
2014-10-15 01:58:05.619	59794	60473	61929	63529
2014-10-15 01:58:05.625	59786	60456	61927	63572
2014-10-15 01:58:05.630	59781	60447	61917	63563
2014-10-15 01:58:05.634	59783	60445	61909	63549
2014-10-15 01:58:05.640	59786	60456	61916	63576
2014-10-15 01:58:05.644	59786	60471	61932	63591
2014-10-15 01:58:05.650	59796	60458	61929	63588
2014-10-15 01:58:05.654	59790	60447	61928	63563
2014-10-15 01:58:05.660	59786	60452	61946	63548
2014-10-15 01:58:05.664	59779	60448	61914	63545
2014-10-15 01:58:05.670	59771	60452	61921	63539
2014-10-15 01:58:05.674	59785	60457	61972	63526
2014-10-15 01:58:05.680	59774	60455	61919	63507
2014-10-15 01:58:05.684	59765	60470	61921	63481
2014-10-15 01:58:05.690	59775	60463	61957	63457
2014-10-15 01:58:05.694	59776	60453	61898	63438
2014-10-15 01:58:05.700	59778	60459	61939	63424
2014-10-15 01:58:05.704	59769	60459	61956	63454
2014-10-15 01:58:05.710	59775	60449	61903	63514
2014-10-15 01:58:05.714	59775	60450	61989	63574
2014-10-15 01:58:05.720	59765	60457	61973	63624
2014-10-15 01:58:05.724	59775	60450	61870	63656
2014-10-15 01:58:05.730	59772	60458	61930	63651
2014-10-15 01:58:05.734	59769	60455	61945	63623
2014-10-15 01:58:05.740	59766	60438	61904	63605
2014-10-15 01:58:05.744	59768	60447	61913	63576
2014-10-15 01:58:05.750	59793	60455	61883	63551
2014-10-15 01:58:05.755	59776	60448	61895	63520
2014-10-15 01:58:05.759	59754	60440	61902	63489
2014-10-15 01:58:05.765	59763	60441	61878	63484
2014-10-15 01:58:05.769	59758	60448	61929	63456
2014-10-15 01:58:05.775	59760	60444	61919	63430
2014-10-15 01:58:05.779	59765	60438	61888	63429
2014-10-15 01:58:05.785	59762	60443	61918	63440
2014-10-15 01:58:05.789	59763	60442	61910	63452
2014-10-15 01:58:05.795	59760	60446	61927	63472
2014-10-15 01:58:05.799	59758	60442	61951	63506
2014-10-15 01:58:05.805	59763	60431	61913	63510
2014-10-15 01:58:05.809	59753	60443	61918	63545
2014-10-15 01:58:05.815	59756	60442	61935	63591
2014-10-15 01:58:05.819	59775	60442	61913	63576
2014-10-15 01:58:05.825	59759	60442	61890	63575
2014-10-15 01:58:05.829	59742	60440	61890	63566
2014-10-15 01:58:05.835	59748	60441	61899	63540
2014-10-15 01:58:05.839	59758	60428	61889	63540
2014-10-15 01:58:05.845	59749	60438	61913	63549
2014-10-15 01:58:05.849	59746	60439	61895	63546
2014-10-15 01:58:05.855	59761	60432	61864	63524
2014-10-15 01:58:05.859	59764	60436	61912	63504
2014-10-15 01:58:05.865	59758	60426	61874	63491
2014-10-15 01:58:05.869	59745	60433	61860	63484
2014-10-15 01:58:05.875	59747	60435	61902	63469
2014-10-15 01:58:05.880	59758	60434	61872	63445
2014-10-15 01:58:05.884	59744	60439	61873	63430
2014-10-15 01:58:05.890	59736	60428	61892	63427
2014-10-15 01:58:05.894	59741	60419	61910	63440
2014-10-15 01:58:05.900	59741	60417	61895	63463
2014-10-15 01:58:05.904	59753	60427	61869	63488
2014-10-15 01:58:05.910	59754	60433	61891	63522
2014-10-15 01:58:05.914	59741	60420	61875	63561
2014-10-15 01:58:05.920	59745	60423	61863	63586
2014-10-15 01:58:05.924	59732	60428	61879	63576
2014-10-15 01:58:05.930	59734	60419	61905	63541
2014-10-15 01:58:05.934	59736	60430	61914	63508
2014-10-15 01:58:05.940	59721	60430	61904	63502
2014-10-15 01:58:05.944	59741	60425	61911	63502
2014-10-15 01:58:05.950	59747	60430	61915	63482
2014-10-15 01:58:05.954	59729	60415	61921	63482
2014-10-15 01:58:05.960	59734	60423	61896	63516
2014-10-15 01:58:05.964	59741	60430	61879	63509
2014-10-15 01:58:05.970	59732	60424	61905	63473
2014-10-15 01:58:05.974	59727	60420	61884	63448
2014-10-15 01:58:05.980	59735	60410	61873	63422
2014-10-15 01:58:05.984	59728	60417	61891	63433
2014-10-15 01:58:05.990	59719	60425	61877	63486
2014-10-15 01:58:05.994	59731	60420	61872	63532
2014-10-15 01:58:06.000	59736	60415	61895	63543
2014-10-15 01:58:06.005	59729	60412	61894	63532
2014-10-15 01:58:06.009	59735	60402	61890	63526
2014-10-15 01:58:06.015	59729	60407	61905	63508
2014-10-15 01:58:06.019	59721	60418	61898	63485
2014-10-15 01:58:06.025	59739	60402	61902	63483
2014-10-15 01:58:06.029	59727	60408	61907	63487
2014-10-15 01:58:06.035	59708	60415	61890	63475
2014-10-15 01:58:06.039	59725	60402	61887	63457
2014-10-15 01:58:06.045	59728	60410	61869	63454
2014-10-15 01:58:06.049	59724	60411	61865	63466
2014-10-15 01:58:06.055	59723	60408	61873	63489
2014-10-15 01:58:06.059	59719	60411	61874	63494
2014-10-15 01:58:06.065	59727	60404	61860	63478
2014-10-15 01:58:06.069	59728	60416	61846	63462
2014-10-15 01:58:06.075	59720	60416	61848	63465
2014-10-15 01:58:06.079	59715	60401	61819	63483
2014-10-15 01:58:06.085	59712	60403	61872	63465
2014-10-15 01:58:06.089	59708	60401	61894	63428
2014-10-15 01:58:06.095	59717	60404	61841	63454
2014-10-15 01:58:06.099	59718	60409	61856	63510
2014-10-15 01:58:06.105	59707	60402	61839	63525
2014-10-15 01:58:06.109	59716	60389	61863	63530
2014-10-15 01:58:06.115	59716	60404	61887	63522
2014-10-15 01:58:06.119	59707	60432	61882	63482
2014-10-15 01:58:06.125	59721	60402	61895	63460
2014-10-15 01:58:06.130	59725	60393	61872	63465
2014-10-15 01:58:06.134	59705	60409	61893	63451
2014-10-15 01:58:06.140	59706	60404	61893	63447
2014-10-15 01:58:06.144	59721	60407	61875	63460
2014-10-15 01:58:06.150	59708	60403	61874	63438
2014-10-15 01:58:06.154	59709	60398	61842	63435
2014-10-15 01:58:06.160	59713	60393	61847	63446
2014-10-15 01:58:06.164	59700	60395	61851	63436
2014-10-15 01:58:06.170	59717	60381	61823	63448
2014-10-15 01:58:06.174	59718	60391	61811	63463
2014-10-15 01:58:06.180	59701	60410	61816	63467
2014-10-15 01:58:06.184	59716	60382	61839	63484
2014-10-15 01:58:06.190	59710	60398	61859	63508
2014-10-15 01:58:06.194	59698	60404	61846	63504
2014-10-15 01:58:06.200	59708	60384	61845	63509
2014-10-15 01:58:06.204	59707	60402	61893	63521
2014-10-15 01:58:06.210	59714	60396	61897	63488
2014-10-15 01:58:06.214	59718	60391	61868	63451
2014-10-15 01:58:06.220	59714	60396	61878	63438
2014-10-15 01:58:06.224	59713	60394	61872	63432
2014-10-15 01:58:06.230	59697	60392	61868	63417
2014-10-15 01:58:06.234	59704	60386	61881	63401
2014-10-15 01:58:06.240	59714	60391	61856	63383
2014-10-15 01:58:06.244	59702	60388	61839	63375
2014-10-15 01:58:06.250	59705	60383	61849	63412
2014-10-15 01:58:06.255	59700	60388	61840	63436
2014-10-15 01:58:06.259	59702	60389	61826	63454
2014-10-15 01:58:06.265	59717	60388	61831	63509
2014-10-15 01:58:06.269	59702	60380	61840	63533
2014-10-15 01:58:06.275	59694	60372	61856	63528
2014-10-15 01:58:06.279	59705	60387	61870	63532
2014-10-15 01:58:06.285	59691	60392	61857	63521
2014-10-15 01:58:06.289	59696	60377	61861	63496
2014-10-15 01:58:06.295	59709	60383	61876	63473
2014-10-15 01:58:06.299	59703	60388	61857	63430
2014-10-15 01:58:06.305	59698	60388	61862	63411
2014-10-15 01:58:06.309	59690	60389	61870	63436
2014-10-15 01:58:06.315	59697	60379	61844	63434
2014-10-15 01:58:06.319	59694	60391	61845	63440
2014-10-15 01:58:06.325	59694	60405	61851	63455
2014-10-15 01:58:06.329	59709	60386	61837	63444
2014-10-15 01:58:06.335	59706	60382	61840	63439
2014-10-15 01:58:06.339	59700	60393	61853	63434
2014-10-15 01:58:06.345	59692	60382	61851	63442
2014-10-15 01:58:06.349	59707	60367	61826	63449
2014-10-15 01:58:06.355	59703	60381	61830	63456
2014-10-15 01:58:06.359	59680	60385	61850	63448
2014-10-15 01:58:06.365	59692	60371	61858	63412
2014-10-15 01:58:06.369	59698	60387	61864	63420
2014-10-15 01:58:06.375	59703	60394	61855	63435
2014-10-15 01:58:06.380	59694	60377	61853	63432
2014-10-15 01:58:06.384	59693	60381	61839	63440
2014-10-15 01:58:06.390	59687	60381	61842	63439
2014-10-15 01:58:06.394	59681	60383	61840	63446
2014-10-15 01:58:06.400	59710	60394	61821	63458
2014-10-15 01:58:06.404	59695	60376	61848	63462
2014-10-15 01:58:06.410	59690	60370	61835	63483
2014-10-15 01:58:06.414	59696	60378	61828	63508
2014-10-15 01:58:06.420	59690	60374	61861	63511
2014-10-15 01:58:06.424	59701	60382	61846	63513
2014-10-15 01:58:06.430	59694	60373	61833	63509
2014-10-15 01:58:06.434	59693	60380	61825	63494
2014-10-15 01:58:06.440	59701	60394	61821	63454
2014-10-15 01:58:06.444	59710	60374	61841	63397
2014-10-15 01:58:06.450	59692	60381	61848	63356
2014-10-15 01:58:06.454	59683	60385	61841	63317
2014-10-15 01:58:06.460	59695	60373	61842	63317
2014-10-15 01:58:06.464	59686	60383	61847	63356
2014-10-15 01:58:06.470	59703	60374	61857	63393
2014-10-15 01:58:06.474	59694	60374	61863	63435
2014-10-15 01:58:06.480	59682	60389	61847	63485
2014-10-15 01:58:06.484	59697	60376	61849	63511
2014-10-15 01:58:06.490	59696	60380	61862	63491
2014-10-15 01:58:06.494	59700	60380	61858	63501
2014-10-15 01:58:06.500	59693	60361	61855	63527
2014-10-15 01:58:06.505	59688	60364	61854	63511
2014-10-15 01:58:06.509	59703	60371	61847	63496
2014-10-15 01:58:06.515	59703	60375	61833	63468
2014-10-15 01:58:06.519	59691	60374	61838	63433
2014-10-15 01:58:06.525	59683	60369	61850	63404
2014-10-15 01:58:06.529	59687	60376	61832	63385
2014-10-15 01:58:06.535	59699	60373	61824	63398
2014-10-15 01:58:06.539	59690	60376	61844	63406
2014-10-15 01:58:06.545	59677	60388	61842	63416
2014-10-15 01:58:06.549	59686	60378	61830	63426
2014-10-15 01:58:06.555	59687	60364	61837	63406
2014-10-15 01:58:06.559	59685	60374	61828	63412
2014-10-15 01:58:06.565	59687	60378	61838	63439
2014-10-15 01:58:06.569	59687	60374	61846	63452
2014-10-15 01:58:06.575	59685	60382	61832	63475
2014-10-15 01:58:06.579	59677	60381	61837	63464
2014-10-15 01:58:06.585	59687	60371	61824	63437
2014-10-15 01:58:06.589	59685	60364	61823	63451
2014-10-15 01:58:06.595	59683	60383	61823	63488
2014-10-15 01:58:06.599	59683	60391	61817	63529
2014-10-15 01:58:06.605	59674	60367	61843	63530
2014-10-15 01:58:06.609	59689	60365	61852	63495
2014-10-15 01:58:06.615	59691	60371	61868	63457
2014-10-15 01:58:06.619	59683	60376	61874	63408
2014-10-15 01:58:06.625	59696	60377	61855	63368
2014-10-15 01:58:06.630	59695	60369	61857	63348
2014-10-15 01:58:06.634	59692	60371	61847	63362
2014-10-15 01:58:06.640	59689	60371	61841	63403
2014-10-15 01:58:06.644	59679	60369	61854	63431
2014-10-15 01:58:06.650	59689	60362	61846	63446
2014-10-15 01:58:06.654	59685	60365	61849	63450
2014-10-15 01:58:06.660	59676	60380	61858	63443
2014-10-15 01:58:06.664	59685	60381	61853	63450
2014-10-15 01:58:06.670	59688	60376	61853	63468
2014-10-15 01:58:06.674	59688	60371	61848	63468
2014-10-15 01:58:06.680	59688	60373	61834	63465
2014-10-15 01:58:06.684	59696	60371	61835	63484
2014-10-15 01:58:06.690	59693	60374	61825	63502
2014-10-15 01:58:06.694	59689	60369	61809	63497
2014-10-15 01:58:06.700	59693	60357	61820	63479
2014-10-15 01:58:06.704	59692	60381	61826	63461
2014-10-15 01:58:06.710	59687	60376	61827	63441
2014-10-15 01:58:06.714	59677	60365	61849	63409
2014-10-15 01:58:06.720	59694	60377	61867	63389
2014-10-15 01:58:06.724	59696	60367	61867	63396
2014-10-15 01:58:06.730	59691	60378	61871	63386
2014-10-15 01:58:06.734	59694	60382	61867	63381
2014-10-15 01:58:06.740	59676	60376	61841	63393
2014-10-15 01:58:06.744	59695	60384	61850	63403
2014-10-15 01:58:06.750	59698	60371	61861	63414
2014-10-15 01:58:06.755	59682	60369	61846	63437
2014-10-15 01:58:06.759	59682	60389	61843	63457
2014-10-15 01:58:06.765	59689	60390	61838	63444
2014-10-15 01:58:06.769	59699	60371	61831	63426
2014-10-15 01:58:06.775	59689	60370	61818	63437
2014-10-15 01:58:06.779	59694	60376	61815	63474
2014-10-15 01:58:06.785	59702	60371	61829	63518
2014-10-15 01:58:06.789	59693	60381	61830	63545
2014-10-15 01:58:06.795	59691	60375	61842	63555
2014-10-15 01:58:06.799	59687	60374	61851	63539
2014-10-15 01:58:06.805	59691	60389	61855	63486
2014-10-15 01:58:06.809	59693	60364	61850	63433
2014-10-15 01:58:06.815	59691	60370	61823	63399
2014-10-15 01:58:06.819	59700	60388	61835	63385
2014-10-15 01:58:06.825	59690	60372	61862	63383
2014-10-15 01:58:06.829	59688	60382	61847	63399
2014-10-15 01:58:06.835	59703	60377	61844	63414
2014-10-15 01:58:06.839	59691	60380	61836	63397
2014-10-15 01:58:06.845	59687	60374	61818	63378
2014-10-15 01:58:06.849	59691	60377	61822	63369
2014-10-15 01:58:06.855	59694	60397	61832	63373
2014-10-15 01:58:06.859	59692	60370	61837	63403
2014-10-15 01:58:06.865	59687	60391	61827	63451
2014-10-15 01:58:06.869	59699	60363	61834	63501
2014-10-15 01:58:06.875	59696	60400	61843	63506
2014-10-15 01:58:06.880	59692	60390	61833	63492
2014-10-15 01:58:06.884	59691	60341	61859	63505
2014-10-15 01:58:06.890	59692	60475	61859	63520
2014-10-15 01:58:06.894	59703	60250	61842	63517
2014-10-15 01:58:06.900	59685	60295	61865	63492
2014-10-15 01:58:06.904	59694	60574	61857	63480
2014-10-15 01:58:06.910	59714	60339	61847	63490
2014-10-15 01:58:06.914	59699	60314	61858	63478
2014-10-15 01:58:06.920	59698	60425	61839	63467
2014-10-15 01:58:06.924	59695	60427	61821	63437
2014-10-15 01:58:06.930	59695	60356	61830	63391
2014-10-15 01:58:06.934	59708	60367	61842	63365
2014-10-15 01:58:06.940	59699	60437	61840	63340
2014-10-15 01:58:06.944	59695	60324	61838	63347
2014-10-15 01:58:06.950	59705	60414	61849	63382
2014-10-15 01:58:06.954	59707	60406	61858	63414
2014-10-15 01:58:06.960	59703	60327	61866	63466
2014-10-15 01:58:06.964	59698	60429	61869	63512
2014-10-15 01:58:06.970	59701	60393	61861	63531
2014-10-15 01:58:06.974	59702	60361	61856	63513
2014-10-15 01:58:06.980	59695	60394	61845	63502
2014-10-15 01:58:06.984	59697	60409	61850	63508
2014-10-15 01:58:06.990	59706	60372	61865	63478
2014-10-15 01:58:06.994	59703	60375	61869	63481
2014-10-15 01:58:07.000	59690	60414	61860	63472
2014-10-15 01:58:07.005	59695	60383	61848	63447
2014-10-15 01:58:07.009	59705	60386	61856	63460
2014-10-15 01:58:07.015	59701	60389	61859	63426
2014-10-15 01:58:07.019	59709	60398	61831	63407
2014-10-15 01:58:07.025	59722	60410	61829	63422
2014-10-15 01:58:07.029	59708	60384	61852	63412
2014-10-15 01:58:07.035	59702	60389	61830	63425
2014-10-15 01:58:07.039	59713	60398	61850	63440
2014-10-15 01:58:07.045	59711	60386	61863	63468
2014-10-15 01:58:07.049	59712	60371	61849	63484
2014-10-15 01:58:07.055	59723	60386	61862	63475
2014-10-15 01:58:07.059	59715	60410	61855	63495
2014-10-15 01:58:07.065	59703	60392	61860	63473
2014-10-15 01:58:07.069	59715	60388	61811	63467
2014-10-15 01:58:07.075	59717	60398	61855	63480
2014-10-15 01:58:07.079	59700	60391	61860	63442
2014-10-15 01:58:07.085	59709	60392	61813	63447
2014-10-15 01:58:07.089	59714	60393	61900	63448
2014-10-15 01:58:07.095	59721	60390	61782	63430
2014-10-15 01:58:07.099	59720	60400	61848	63442
2014-10-15 01:58:07.105	59687	60401	61925	63444
2014-10-15 01:58:07.109	59709	60390	61775	63466
2014-10-15 01:58:07.115	59734	60394	61854	63467
2014-10-15 01:58:07.119	59703	60396	61885	63464
2014-10-15 01:58:07.125	59710	60392	61901	63485
2014-10-15 01:58:07.130	59723	60388	61856	63469
2014-10-15 01:58:07.134	59722	60395	61828	63457
2014-10-15 01:58:07.140	59729	60407	61946	63455
2014-10-15 01:58:07.144	59722	60396	61891	63447
2014-10-15 01:58:07.150	59716	60401	61866	63450
2014-10-15 01:58:07.154	59714	60406	61858	63464
2014-10-15 01:58:07.160	59713	60391	61817	63477
2014-10-15 01:58:07.164	59714	60400	61852	63471
2014-10-15 01:58:07.170	59723	60402	61847	63492
2014-10-15 01:58:07.174	59723	60408	61860	63509
2014-10-15 01:58:07.180	59713	60424	61867	63475
2014-10-15 01:58:07.184	59725	60414	61848	63465
2014-10-15 01:58:07.190	59714	60413	61857	63467
2014-10-15 01:58:07.194	59714	60408	61851	63445
2014-10-15 01:58:07.200	59726	60402	61848	63432
2014-10-15 01:58:07.204	59709	60411	61848	63431
2014-10-15 01:58:07.210	59727	60403	61855	63430
2014-10-15 01:58:07.214	59720	60405	61868	63431
2014-10-15 01:58:07.220	59709	60414	61864	63449
2014-10-15 01:58:07.224	59736	60410	61874	63483
2014-10-15 01:58:07.230	59718	60406	61861	63510
2014-10-15 01:58:07.234	59725	60405	61844	63531
2014-10-15 01:58:07.240	59734	60407	61854	63535
2014-10-15 01:58:07.244	59715	60406	61844	63521
2014-10-15 01:58:07.250	59731	60419	61849	63526
2014-10-15 01:58:07.255	59723	60419	61869	63516
2014-10-15 01:58:07.259	59710	60399	61869	63498
2014-10-15 01:58:07.265	59726	60408	61858	63486
2014-10-15 01:58:07.269	59729	60413	61854	63479
2014-10-15 01:58:07.275	59732	60413	61869	63475
2014-10-15 01:58:07.279	59745	60424	61882	63439
2014-10-15 01:58:07.285	59734	60419	61881	63413
2014-10-15 01:58:07.289	59732	60420	61862	63389
2014-10-15 01:58:07.295	59741	60417	61851	63384
2014-10-15 01:58:07.299	59730	60410	61865	63430
2014-10-15 01:58:07.305	59731	60426	61873	63447
2014-10-15 01:58:07.309	59727	60428	61867	63471
2014-10-15 01:58:07.315	59730	60409	61858	63490
2014-10-15 01:58:07.319	59744	60416	61845	63479
2014-10-15 01:58:07.325	59742	60424	61830	63505
2014-10-15 01:58:07.329	59740	60410	61858	63537
2014-10-15 01:58:07.335	59735	60413	61875	63553
2014-10-15 01:58:07.339	59732	60419	61873	63540
2014-10-15 01:58:07.345	59725	60417	61888	63539
2014-10-15 01:58:07.349	59742	60427	61879	63549
2014-10-15 01:58:07.355	59758	60415	61897	63524
2014-10-15 01:58:07.359	59730	60400	61909	63507
2014-10-15 01:58:07.365	59733	60419	61898	63481
2014-10-15 01:58:07.369	59744	60418	61904	63461
2014-10-15 01:58:07.375	59727	60426	61893	63471
2014-10-15 01:58:07.380	59733	60439	61882	63466
2014-10-15 01:58:07.384	59741	60417	61880	63470
2014-10-15 01:58:07.390	59739	60421	61874	63455
2014-10-15 01:58:07.394	59741	60436	61869	63415
2014-10-15 01:58:07.400	59746	60437	61877	63393
2014-10-15 01:58:07.404	59750	60429	61864	63396
2014-10-15 01:58:07.410	59750	60422	61840	63434
2014-10-15 01:58:07.414	59752	60433	61880	63480
2014-10-15 01:58:07.420	59745	60422	61904	63506
2014-10-15 01:58:07.424	59742	60425	61887	63521
2014-10-15 01:58:07.430	59746	60448	61900	63534
2014-10-15 01:58:07.434	59744	60443	61898	63566
2014-10-15 01:58:07.440	59751	60438	61869	63588
2014-10-15 01:58:07.444	59744	60445	61872	63575
2014-10-15 01:58:07.450	59741	60437	61881	63541
2014-10-15 01:58:07.454	59752	60436	61879	63520
2014-10-15 01:58:07.460	59743	60442	61874	63511
2014-10-15 01:58:07.464	59750	60437	61864	63477
2014-10-15 01:58:07.470	59759	60443	61863	63477
2014-10-15 01:58:07.474	59745	60433	61887	63488
2014-10-15 01:58:07.480	59741	60424	61890	63462
2014-10-15 01:58:07.484	59746	60435	61867	63443
2014-10-15 01:58:07.490	59749	60435	61879	63431
2014-10-15 01:58:07.494	59749	60437	61889	63419
2014-10-15 01:58:07.500	59750	60442	61885	63404
2014-10-15 01:58:07.505	59752	60443	61901	63421
2014-10-15 01:58:07.509	59752	60446	61906	63490
2014-10-15 01:58:07.515	59762	60448	61909	63549
2014-10-15 01:58:07.519	59755	60449	61909	63572
2014-10-15 01:58:07.525	59743	60441	61906	63576
2014-10-15 01:58:07.529	59745	60438	61902	63577
2014-10-15 01:58:07.535	59748	60442	61896	63568
2014-10-15 01:58:07.539	59756	60439	61903	63559
2014-10-15 01:58:07.545	59752	60444	61894	63555
2014-10-15 01:58:07.549	59751	60452	61885	63528
2014-10-15 01:58:07.555	59750	60449	61880	63504
2014-10-15 01:58:07.559	59749	60448	61877	63485
2014-10-15 01:58:07.565	59757	60445	61881	63466
2014-10-15 01:58:07.569	59753	60440	61888	63447
2014-10-15 01:58:07.575	59753	60440	61902	63418
2014-10-15 01:58:07.579	59760	60445	61901	63433
2014-10-15 01:58:07.585	59770	60451	61891	63468
2014-10-15 01:58:07.589	59765	60443	61888	63484
2014-10-15 01:58:07.595	59750	60444	61894	63514
2014-10-15 01:58:07.599	59761	60449	61882	63544
2014-10-15 01:58:07.605	59779	60446	61879	63557
2014-10-15 01:58:07.609	59772	60455	61897	63557
2014-10-15 01:58:07.615	59756	60448	61884	63562
2014-10-15 01:58:07.619	59752	60445	61891	63561
2014-10-15 01:58:07.625	59767	60460	61898	63544
2014-10-15 01:58:07.630	59771	60454	61892	63534
2014-10-15 01:58:07.634	59758	60446	61921	63526
2014-10-15 01:58:07.640	59762	60457	61914	63529
2014-10-15 01:58:07.644	59759	60457	61906	63545
2014-10-15 01:58:07.650	59756	60444	61936	63554
2014-10-15 01:58:07.654	59770	60449	61943	63548
2014-10-15 01:58:07.660	59765	60450	61927	63507
2014-10-15 01:58:07.664	59759	60442	61932	63482
2014-10-15 01:58:07.670	59761	60450	61932	63469
2014-10-15 01:58:07.674	59762	60450	61911	63444
2014-10-15 01:58:07.680	59767	60455	61915	63470
2014-10-15 01:58:07.684	59778	60463	61922	63476
2014-10-15 01:58:07.690	59774	60453	61901	63461
2014-10-15 01:58:07.694	59763	60466	61888	63483
2014-10-15 01:58:07.700	59766	60465	61890	63478
2014-10-15 01:58:07.704	59771	60459	61885	63491
2014-10-15 01:58:07.710	59780	60462	61888	63508
2014-10-15 01:58:07.714	59769	60448	61887	63527
2014-10-15 01:58:07.720	59769	60454	61898	63569
2014-10-15 01:58:07.724	59778	60456	61913	63578
2014-10-15 01:58:07.730	59764	60451	61899	63605
2014-10-15 01:58:07.734	59769	60457	61901	63602
2014-10-15 01:58:07.740	59763	60463	61895	63564
2014-10-15 01:58:07.744	59767	60471	61889	63547
2014-10-15 01:58:07.750	59777	60450	61906	63535
2014-10-15 01:58:07.755	59763	60456	61925	63542
2014-10-15 01:58:07.759	59772	60468	61940	63525
2014-10-15 01:58:07.765	59777	60453	61915	63508
2014-10-15 01:58:07.769	59781	60469	61916	63516
2014-10-15 01:58:07.775	59792	60466	61936	63501
2014-10-15 01:58:07.779	59785	60453	61918	63471
2014-10-15 01:58:07.785	59774	60466	61914	63451
2014-10-15 01:58:07.789	59782	60470	61895	63474
2014-10-15 01:58:07.795	59778	60465	61898	63483
2014-10-15 01:58:07.799	59763	60469	61920	63472
2014-10-15 01:58:07.805	59787	60473	61923	63488
2014-10-15 01:58:07.809	59792	60460	61933	63512
2014-10-15 01:58:07.815	59760	60463	61930	63538
2014-10-15 01:58:07.819	59763	60469	61930	63560
2014-10-15 01:58:07.825	59781	60458	61927	63574
2014-10-15 01:58:07.829	59777	60459	61916	63573
2014-10-15 01:58:07.835	59775	60467	61930	63583
2014-10-15 01:58:07.839	59774	60476	61934	63611
2014-10-15 01:58:07.845	59785	60475	61926	63616
2014-10-15 01:58:07.849	59786	60467	61925	63610
2014-10-15 01:58:07.855	59771	60467	61923	63585
2014-10-15 01:58:07.859	59778	60469	61927	63538
2014-10-15 01:58:07.865	59782	60463	61915	63504
2014-10-15 01:58:07.869	59787	60476	61898	63477
2014-10-15 01:58:07.875	59778	60486	61899	63462
2014-10-15 01:58:07.880	59771	60466	61899	63467
2014-10-15 01:58:07.884	59782	60467	61906	63477
2014-10-15 01:58:07.890	59782	60478	61916	63479
2014-10-15 01:58:07.894	59788	60462	61928	63483
2014-10-15 01:58:07.900	59781	60460	61931	63489
2014-10-15 01:58:07.904	59780	60469	61923	63504
2014-10-15 01:58:07.910	59787	60467	61928	63524
2014-10-15 01:58:07.914	59775	60483	61933	63565
2014-10-15 01:58:07.920	59774	60476	61922	63598
2014-10-15 01:58:07.924	59779	60467	61921	63587
2014-10-15 01:58:07.930	59787	60489	61919	63591
2014-10-15 01:58:07.934	59788	60469	61920	63596
2014-10-15 01:58:07.940	59780	60463	61929	63583
2014-10-15 01:58:07.944	59789	60488	61918	63578
2014-10-15 01:58:07.950	59790	60478	61929	63559
2014-10-15 01:58:07.954	59782	60468	61928	63547
2014-10-15 01:58:07.960	59791	60482	61922	63556
2014-10-15 01:58:07.964	59792	60484	61955	63550
2014-10-15 01:58:07.970	59788	60472	61975	63517
2014-10-15 01:58:07.974	59797	60478	61975	63500
2014-10-15 01:58:07.980	59801	60470	61945	63502
2014-10-15 01:58:07.984	59803	60461	61935	63504
2014-10-15 01:58:07.990	59797	60475	61952	63517
2014-10-15 01:58:07.994	59789	60478	61939	63530
2014-10-15 01:58:08.000	59804	60479	61928	63536
2014-10-15 01:58:08.005	59796	60484	61912	63554
2014-10-15 01:58:08.009	59786	60487	61926	63581
2014-10-15 01:58:08.015	59801	60487	61956	63584
2014-10-15 01:58:08.019	59794	60485	61930	63552
2014-10-15 01:58:08.025	59795	60478	61892	63528
2014-10-15 01:58:08.029	59806	60477	61895	63515
2014-10-15 01:58:08.035	59795	60490	61932	63521
2014-10-15 01:58:08.039	59791	60480	61932	63543
2014-10-15 01:58:08.045	59797	60470	61921	63537
2014-10-15 01:58:08.049	59801	60477	61934	63548
2014-10-15 01:58:08.055	59796	60475	61938	63572
2014-10-15 01:58:08.059	59789	60473	61956	63566
2014-10-15 01:58:08.065	59784	60479	61962	63571
2014-10-15 01:58:08.069	59792	60483	61938	63556
2014-10-15 01:58:08.075	59797	60483	61921	63540
2014-10-15 01:58:08.079	59792	60484	61914	63553
2014-10-15 01:58:08.085	59801	60484	61917	63558
2014-10-15 01:58:08.089	59793	60477	61913	63569
2014-10-15 01:58:08.095	59793	60478	61903	63558
2014-10-15 01:58:08.099	59803	60486	61920	63534
2014-10-15 01:58:08.105	59798	60480	61940	63532
2014-10-15 01:58:08.109	59802	60477	61945	63524
2014-10-15 01:58:08.115	59807	60484	61946	63540
2014-10-15 01:58:08.119	59800	60487	61940	63532
2014-10-15 01:58:08.125	59796	60482	61954	63514
2014-10-15 01:58:08.130	59808	60481	61958	63555
2014-10-15 01:58:08.134	59806	60499	61950	63577
2014-10-15 01:58:08.140	59805	60497	61961	63591
2014-10-15 01:58:08.144	59806	60478	61980	63593
2014-10-15 01:58:08.150	59806	60492	61986	63572
2014-10-15 01:58:08.154	59811	60498	61971	63569
2014-10-15 01:58:08.160	59798	60481	61950	63542
2014-10-15 01:58:08.164	59799	60483	61951	63540
2014-10-15 01:58:08.170	59802	60487	61955	63564
2014-10-15 01:58:08.174	59798	60479	61941	63556
2014-10-15 01:58:08.180	59792	60489	61936	63536
2014-10-15 01:58:08.184	59796	60496	61922	63518
2014-10-15 01:58:08.190	59810	60478	61917	63524
2014-10-15 01:58:08.194	59798	60479	61918	63541
2014-10-15 01:58:08.200	59799	60481	61906	63542
2014-10-15 01:58:08.204	59813	60484	61921	63540
2014-10-15 01:58:08.210	59805	60510	61927	63559
2014-10-15 01:58:08.214	59798	60496	61932	63585
2014-10-15 01:58:08.220	59801	60493	61944	63598
2014-10-15 01:58:08.224	59803	60504	61941	63608
2014-10-15 01:58:08.230	59804	60482	61952	63597
2014-10-15 01:58:08.234	59807	60493	61963	63591
2014-10-15 01:58:08.240	59806	60501	61956	63591
2014-10-15 01:58:08.244	59798	60489	61947	63572
2014-10-15 01:58:08.250	59793	60496	61955	63556
2014-10-15 01:58:08.255	59788	60493	61951	63524
2014-10-15 01:58:08.259	59801	60500	61946	63503
2014-10-15 01:58:08.265	59809	60505	61959	63511
2014-10-15 01:58:08.269	59785	60485	61947	63503
2014-10-15 01:58:08.275	59790	60487	61940	63487
2014-10-15 01:58:08.279	59810	60504	61931	63510
2014-10-15 01:58:08.285	59804	60491	61926	63571
2014-10-15 01:58:08.289	59804	60478	61944	63615
2014-10-15 01:58:08.295	59803	60488	61936	63628
2014-10-15 01:58:08.299	59801	60490	61943	63600
2014-10-15 01:58:08.305	59800	60485	61952	63560
2014-10-15 01:58:08.309	59803	60493	61957	63546
2014-10-15 01:58:08.315	59813	60498	61969	63542
2014-10-15 01:58:08.319	59812	60498	61939	63551
2014-10-15 01:58:08.325	59801	60495	61943	63560
2014-10-15 01:58:08.329	59788	60482	61928	63574
2014-10-15 01:58:08.335	59801	60494	61893	63610
2014-10-15 01:58:08.339	59805	60510	61911	63613
2014-10-15 01:58:08.345	59792	60503	61909	63591
2014-10-15 01:58:08.349	59808	60504	61922	63583
2014-10-15 01:58:08.355	59802	60501	61934	63560
2014-10-15 01:58:08.359	59793	60495	61919	63557
2014-10-15 01:58:08.365	59808	60493	61935	63550
2014-10-15 01:58:08.369	59804	60493	61946	63533
2014-10-15 01:58:08.375	59802	60501	61955	63549
2014-10-15 01:58:08.380	59812	60496	61961	63542
2014-10-15 01:58:08.384	59815	60487	61961	63540
2014-10-15 01:58:08.390	59810	60504	61974	63546
2014-10-15 01:58:08.394	59802	60508	61965	63533
2014-10-15 01:58:08.400	59803	60493	61970	63527
2014-10-15 01:58:08.404	59812	60499	61964	63531
2014-10-15 01:58:08.410	59804	60505	61949	63561
2014-10-15 01:58:08.414	59794	60491	61972	63590
2014-10-15 01:58:08.420	59800	60492	61951	63598
2014-10-15 01:58:08.424	59807	60506	61927	63594
2014-10-15 01:58:08.430	59799	60500	61938	63577
2014-10-15 01:58:08.434	59793	60494	61934	63575
2014-10-15 01:58:08.440	59805	60502	61948	63579
2014-10-15 01:58:08.444	59813	60500	61959	63578
2014-10-15 01:58:08.450	59801	60490	61943	63569
2014-10-15 01:58:08.454	59791	60493	61940	63578
2014-10-15 01:58:08.460	59795	60508	61944	63600
2014-10-15 01:58:08.464	59808	60500	61945	63582
2014-10-15 01:58:08.470	59804	60493	61953	63569
2014-10-15 01:58:08.474	59800	60510	61946	63564
2014-10-15 01:58:08.480	59813	60508	61948	63533
2014-10-15 01:58:08.484	59806	60500	61949	63526
2014-10-15 01:58:08.490	59812	60500	61921	63520
2014-10-15 01:58:08.494	59811	60505	61949	63521
2014-10-15 01:58:08.500	59795	60501	61975	63527
2014-10-15 01:58:08.505	59817	60498	61940	63526
2014-10-15 01:58:08.509	59812	60500	61923	63555
2014-10-15 01:58:08.515	59799	60494	61934	63586
2014-10-15 01:58:08.519	59806	60504	61943	63604
2014-10-15 01:58:08.525	59806	60509	61938	63582
2014-10-15 01:58:08.529	59817	60497	61936	63559
2014-10-15 01:58:08.535	59809	60493	61932	63576
2014-10-15 01:58:08.539	59800	60497	61920	63592
2014-10-15 01:58:08.545	59804	60508	61926	63601
2014-10-15 01:58:08.549	59803	60514	61915	63586
2014-10-15 01:58:08.555	59810	60507	61911	63591
2014-10-15 01:58:08.559	59811	60503	61925	63594
2014-10-15 01:58:08.565	59799	60512	61913	63555
2014-10-15 01:58:08.569	59809	60510	61909	63538
2014-10-15 01:58:08.575	59808	60499	61917	63523
2014-10-15 01:58:08.579	59793	60505	61924	63511
2014-10-15 01:58:08.585	59812	60503	61937	63513
2014-10-15 01:58:08.589	59799	60505	61950	63512
2014-10-15 01:58:08.595	59793	60507	61950	63526
2014-10-15 01:58:08.599	59809	60501	61949	63542
2014-10-15 01:58:08.605	59803	60511	61953	63559
2014-10-15 01:58:08.609	59813	60504	61943	63590
2014-10-15 01:58:08.615	59801	60499	61942	63614
2014-10-15 01:58:08.619	59802	60502	61954	63612
2014-10-15 01:58:08.625	59810	60493	61955	63612
2014-10-15 01:58:08.630	59796	60502	61954	63610
2014-10-15 01:58:08.634	59814	60507	61946	63596
2014-10-15 01:58:08.640	59799	60503	61939	63601
2014-10-15 01:58:08.644	59792	60496	61946	63608
2014-10-15 01:58:08.650	59808	60487	61943	63589
2014-10-15 01:58:08.654	59812	60499	61925	63533
2014-10-15 01:58:08.660	59812	60516	61914	63484
2014-10-15 01:58:08.664	59787	60511	61919	63473
2014-10-15 01:58:08.670	59793	60496	61948	63493
2014-10-15 01:58:08.674	59812	60516	61931	63532
2014-10-15 01:58:08.680	59810	60518	61888	63541
2014-10-15 01:58:08.684	59800	60503	61920	63535
2014-10-15 01:58:08.690	59803	60509	61948	63530
2014-10-15 01:58:08.694	59813	60503	61945	63541
2014-10-15 01:58:08.700	59809	60506	61936	63583
2014-10-15 01:58:08.704	59818	60490	61937	63626
2014-10-15 01:58:08.710	59812	60491	61952	63651
2014-10-15 01:58:08.714	59803	60519	61935	63649
2014-10-15 01:58:08.720	59802	60499	61956	63636
2014-10-15 01:58:08.724	59798	60497	61974	63599
2014-10-15 01:58:08.730	59799	60500	61945	63562
2014-10-15 01:58:08.734	59794	60480	61945	63551
2014-10-15 01:58:08.740	59808	60495	61945	63541
2014-10-15 01:58:08.744	59807	60510	61943	63539
2014-10-15 01:58:08.750	59801	60502	61946	63536
2014-10-15 01:58:08.755	59801	60497	61935	63533
2014-10-15 01:58:08.759	59810	60509	61934	63541
2014-10-15 01:58:08.765	59814	60511	61942	63536
2014-10-15 01:58:08.769	59795	60498	61932	63527
2014-10-15 01:58:08.775	59803	60502	61923	63532
2014-10-15 01:58:08.779	59810	60504	61938	63542
2014-10-15 01:58:08.785	59801	60508	61940	63554
2014-10-15 01:58:08.789	59798	60500	61936	63579
2014-10-15 01:58:08.795	59787	60492	61937	63622
2014-10-15 01:58:08.799	59801	60507	61928	63634
2014-10-15 01:58:08.805	59807	60498	61916	63597
2014-10-15 01:58:08.809	59788	60489	61915	63575
2014-10-15 01:58:08.815	59791	60502	61927	63565
2014-10-15 01:58:08.819	59803	60499	61924	63547
2014-10-15 01:58:08.825	59801	60505	61946	63526
2014-10-15 01:58:08.829	59804	60500	61955	63514
2014-10-15 01:58:08.835	59809	60493	61936	63528
2014-10-15 01:58:08.839	59804	60503	61959	63535
2014-10-15 01:58:08.845	59806	60494	61954	63536
2014-10-15 01:58:08.849	59809	60505	61936	63543
2014-10-15 01:58:08.855	59807	60512	61964	63557
2014-10-15 01:58:08.859	59812	60496	61959	63574
2014-10-15 01:58:08.865	59806	60504	61958	63578
2014-10-15 01:58:08.869	59796	60502	61965	63600
2014-10-15 01:58:08.875	59800	60499	61954	63629
2014-10-15 01:58:08.880	59805	60508	61964	63625
2014-10-15 01:58:08.884	59816	60488	61940	63623
2014-10-15 01:58:08.890	59803	60492	61904	63629
2014-10-15 01:58:08.894	59788	60513	61917	63603
2014-10-15 01:58:08.900	59809	60490	61923	63553
2014-10-15 01:58:08.904	59815	60493	61937	63522
2014-10-15 01:58:08.910	59802	60503	61955	63500
2014-10-15 01:58:08.914	59791	60496	61951	63494
2014-10-15 01:58:08.920	59804	60517	61955	63515
2014-10-15 01:58:08.924	59810	60503	61948	63542
2014-10-15 01:58:08.930	59796	60493	61940	63559
2014-10-15 01:58:08.934	59809	60505	61930	63539
2014-10-15 01:58:08.940	59808	60501	61915	63512
2014-10-15 01:58:08.944	59803	60498	61928	63518
2014-10-15 01:58:08.950	59805	60484	61926	63537
2014-10-15 01:58:08.954	59802	60498	61908	63565
2014-10-15 01:58:08.960	59808	60512	61931	63605
2014-10-15 01:58:08.964	59802	60494	61945	63639
2014-10-15 01:58:08.970	59796	60491	61937	63641
2014-10-15 01:58:08.974	59803	60499	61954	63614
2014-10-15 01:58:08.980	59815	60504	61944	63599
2014-10-15 01:58:08.984	59805	60491	61947	63606
2014-10-15 01:58:08.990	59798	60480	61973	63588
2014-10-15 01:58:08.994	59818	60501	61968	63570
2014-10-15 01:58:09.000	59808	60495	61988	63563
2014-10-15 01:58:09.005	59802	60486	61977	63514
2014-10-15 01:58:09.009	59798	60509	61947	63475
2014-10-15 01:58:09.015	59794	60497	61954	63484
2014-10-15 01:58:09.019	59817	60490	61934	63531
2014-10-15 01:58:09.025	59802	60503	61920	63558
2014-10-15 01:58:09.029	59797	60502	61919	63536
2014-10-15 01:58:09.035	59814	60497	61910	63539
2014-10-15 01:58:09.039	59806	60496	61915	63546
2014-10-15 01:58:09.045	59796	60503	61918	63555
2014-10-15 01:58:09.049	59786	60491	61915	63579
2014-10-15 01:58:09.055	59799	60488	61919	63604
2014-10-15 01:58:09.059	59809	60493	61944	63625
2014-10-15 01:58:09.065	59803	60487	61946	63607
2014-10-15 01:58:09.069	59801	60494	61948	63591
2014-10-15 01:58:09.075	59791	60482	61973	63593
2014-10-15 01:58:09.079	59805	60477	61961	63573
2014-10-15 01:58:09.085	59814	60501	61958	63560
2014-10-15 01:58:09.089	59790	60493	61960	63573
2014-10-15 01:58:09.095	59791	60486	61945	63564
2014-10-15 01:58:09.099	59803	60492	61961	63514
2014-10-15 01:58:09.105	59800	60484	61954	63496
2014-10-15 01:58:09.109	59802	60491	61942	63520
2014-10-15 01:58:09.115	59795	60489	61948	63546
2014-10-15 01:58:09.119	59799	60490	61934	63595
2014-10-15 01:58:09.125	59814	60491	61921	63630
2014-10-15 01:58:09.130	59797	60478	61910	63623
2014-10-15 01:58:09.134	59803	60486	61927	63605
2014-10-15 01:58:09.140	59809	60500	61952	63589
2014-10-15 01:58:09.144	59783	60492	61953	63581
2014-10-15 01:58:09.150	59788	60480	61947	63548
2014-10-15 01:58:09.154	59790	60491	61961	63511
2014-10-15 01:58:09.160	59792	60501	61982	63498
2014-10-15 01:58:09.164	59802	60483	61966	63496
2014-10-15 01:58:09.170	59796	60480	61966	63512
2014-10-15 01:58:09.174	59806	60485	61964	63542
2014-10-15 01:58:09.180	59798	60476	61950	63588
2014-10-15 01:58:09.184	59790	60488	61964	63616
2014-10-15 01:58:09.190	59794	60487	61956	63602
2014-10-15 01:58:09.194	59787	60465	61934	63569
2014-10-15 01:58:09.200	59791	60481	61933	63558
2014-10-15 01:58:09.204	59776	60492	61953	63579
2014-10-15 01:58:09.210	59785	60482	61950	63582
2014-10-15 01:58:09.214	59800	60486	61930	63576
2014-10-15 01:58:09.220	59798	60483	61943	63568
2014-10-15 01:58:09.224	59809	60481	61936	63556
2014-10-15 01:58:09.230	59791	60492	61928	63527
2014-10-15 01:58:09.234	59793	60482	61940	63505
2014-10-15 01:58:09.240	59796	60471	61944	63539
2014-10-15 01:58:09.244	59795	60485	61953	63558
2014-10-15 01:58:09.250	59801	60486	61963	63553
2014-10-15 01:58:09.255	59788	60486	61977	63558
2014-10-15 01:58:09.259	59803	60488	61970	63568
2014-10-15 01:58:09.265	59798	60476	61955	63588
2014-10-15 01:58:09.269	59791	60486	61961	63590
2014-10-15 01:58:09.275	59798	60492	61954	63575
2014-10-15 01:58:09.279	59796	60488	61949	63560
2014-10-15 01:58:09.285	59803	60487	61955	63567
2014-10-15 01:58:09.289	59799	60469	61934	63571
2014-10-15 01:58:09.295	59798	60467	61919	63564
2014-10-15 01:58:09.299	59796	60475	61931	63569
2014-10-15 01:58:09.305	59797	60479	61937	63540
2014-10-15 01:58:09.309	59799	60474	61945	63519
2014-10-15 01:58:09.315	59801	60465	61957	63547
2014-10-15 01:58:09.319	59804	60481	61957	63573
2014-10-15 01:58:09.325	59793	60484	61961	63585
2014-10-15 01:58:09.329	59796	60472	61965	63587
2014-10-15 01:58:09.335	59787	60475	61959	63587
2014-10-15 01:58:09.339	59776	60477	61972	63586
2014-10-15 01:58:09.345	59791	60478	61995	63562
2014-10-15 01:58:09.349	59799	60472	61980	63534
2014-10-15 01:58:09.355	59796	60467	61942	63533
2014-10-15 01:58:09.359	59802	60480	61941	63558
2014-10-15 01:58:09.365	59797	60468	61953	63573
2014-10-15 01:58:09.369	59791	60457	61935	63572
2014-10-15 01:58:09.375	59802	60474	61949	63564
2014-10-15 01:58:09.380	59800	60473	61966	63521
2014-10-15 01:58:09.384	59797	60471	61936	63487
2014-10-15 01:58:09.390	59799	60469	61928	63512
2014-10-15 01:58:09.394	59792	60478	61935	63551
2014-10-15 01:58:09.400	59794	60481	61937	63576
2014-10-15 01:58:09.404	59796	60475	61953	63594
2014-10-15 01:58:09.410	59795	60485	61957	63597
2014-10-15 01:58:09.414	59793	60468	61957	63566
2014-10-15 01:58:09.420	59794	60462	61966	63566
2014-10-15 01:58:09.424	59799	60469	61975	63589
2014-10-15 01:58:09.430	59787	60462	61979	63547
2014-10-15 01:58:09.434	59790	60467	61972	63516
2014-10-15 01:58:09.440	59801	60473	61966	63501
2014-10-15 01:58:09.444	59780	60471	61988	63494
2014-10-15 01:58:09.450	59785	60464	61969	63521
2014-10-15 01:58:09.454	59795	60463	61936	63555
2014-10-15 01:58:09.460	59787	60464	61948	63589
2014-10-15 01:58:09.464	59802	60462	61943	63591
2014-10-15 01:58:09.470	59797	60465	61946	63600
2014-10-15 01:58:09.474	59792	60468	61956	63590
2014-10-15 01:58:09.480	59810	60475	61955	63555
2014-10-15 01:58:09.484	59810	60476	61955	63571
2014-10-15 01:58:09.490	59796	60462	61928	63558
2014-10-15 01:58:09.494	59794	60464	61923	63527
2014-10-15 01:58:09.500	59792	60473	61936	63527
2014-10-15 01:58:09.505	59795	60470	61948	63530
2014-10-15 01:58:09.509	59792	60469	61956	63552
2014-10-15 01:58:09.515	59782	60468	61952	63552
2014-10-15 01:58:09.519	59793	60469	61959	63535
2014-10-15 01:58:09.525	59801	60468	61930	63555
2014-10-15 01:58:09.529	59792	60467	61937	63585
2014-10-15 01:58:09.535	59795	60467	61970	63593
2014-10-15 01:58:09.539	59800	60455	61944	63584
2014-10-15 01:58:09.545	59787	60453	61973	63567
2014-10-15 01:58:09.549	59789	60462	61991	63550
2014-10-15 01:58:09.555	59796	60451	61963	63525
2014-10-15 01:58:09.559	59798	60445	61981	63522
2014-10-15 01:58:09.565	59801	60457	61978	63535
2014-10-15 01:58:09.569	59784	60453	61982	63548
2014-10-15 01:58:09.575	59787	60456	61975	63579
2014-10-15 01:58:09.579	59788	60465	61955	63587
2014-10-15 01:58:09.585	59782	60457	61973	63605
2014-10-15 01:58:09.589	59797	60453	61944	63602
2014-10-15 01:58:09.595	59787	60450	61934	63558
2014-10-15 01:58:09.599	59792	60458	61967	63550
2014-10-15 01:58:09.605	59800	60459	61945	63532
2014-10-15 01:58:09.609	59783	60448	61916	63509
2014-10-15 01:58:09.615	59783	60459	61918	63506
2014-10-15 01:58:09.619	59787	60469	61923	63514
2014-10-15 01:58:09.625	59795	60456	61930	63526
2014-10-15 01:58:09.630	59804	60449	61925	63511
2014-10-15 01:58:09.634	59797	60463	61925	63520
2014-10-15 01:58:09.640	59784	60470	61944	63548
2014-10-15 01:58:09.644	59790	60454	61959	63575
2014-10-15 01:58:09.650	59798	60450	61968	63597
2014-10-15 01:58:09.654	59785	60460	61969	63597
2014-10-15 01:58:09.660	59785	60457	61974	63625
2014-10-15 01:58:09.664	59794	60452	61993	63640
2014-10-15 01:58:09.670	59794	60458	61987	63613
2014-10-15 01:58:09.674	59800	60464	61985	63588
2014-10-15 01:58:09.680	59796	60463	61974	63551
2014-10-15 01:58:09.684	59790	60453	61950	63525
2014-10-15 01:58:09.690	59799	60458	61965	63499
2014-10-15 01:58:09.694	59789	60452	61964	63491
2014-10-15 01:58:09.700	59785	60450	61949	63501
2014-10-15 01:58:09.704	59788	60464	61937	63504
2014-10-15 01:58:09.710	59780	60448	61925	63526
2014-10-15 01:58:09.714	59788	60457	61949	63540
2014-10-15 01:58:09.720	59784	60465	61970	63546
2014-10-15 01:58:09.724	59789	60449	61970	63556
2014-10-15 01:58:09.730	59802	60458	61951	63584
2014-10-15 01:58:09.734	59790	60465	61938	63597
2014-10-15 01:58:09.740	59794	60467	61949	63584
2014-10-15 01:58:09.744	59787	60460	61947	63586
2014-10-15 01:58:09.750	59783	60460	61951	63561
2014-10-15 01:58:09.755	59790	60459	61967	63553
2014-10-15 01:58:09.759	59787	60441	61961	63563
2014-10-15 01:58:09.765	59782	60447	61950	63544
2014-10-15 01:58:09.769	59780	60455	61960	63544
2014-10-15 01:58:09.775	59797	60459	61954	63543
2014-10-15 01:58:09.779	59799	60464	61947	63521
2014-10-15 01:58:09.785	59782	60467	61957	63504
2014-10-15 01:58:09.789	59771	60465	61947	63528
2014-10-15 01:58:09.795	59772	60452	61944	63558
2014-10-15 01:58:09.799	59786	60455	61950	63562
2014-10-15 01:58:09.805	59791	60454	61952	63565
2014-10-15 01:58:09.809	59798	60449	61949	63548
2014-10-15 01:58:09.815	59779	60461	61935	63546
2014-10-15 01:58:09.819	59776	60462	61926	63575
2014-10-15 01:58:09.825	59798	60449	61913	63595
2014-10-15 01:58:09.829	59789	60447	61935	63595
2014-10-15 01:58:09.835	59783	60464	61962	63580
2014-10-15 01:58:09.839	59774	60471	61963	63549
2014-10-15 01:58:09.845	59788	60464	61988	63523
2014-10-15 01:58:09.849	59788	60456	61983	63531
2014-10-15 01:58:09.855	59775	60458	61960	63540
2014-10-15 01:58:09.859	59798	60466	61980	63540
2014-10-15 01:58:09.865	59794	60451	61973	63547
2014-10-15 01:58:09.869	59780	60444	61926	63557
2014-10-15 01:58:09.875	59780	60462	61965	63556
2014-10-15 01:58:09.880	59783	60454	61978	63540
2014-10-15 01:58:09.884	59793	60452	61938	63532
2014-10-15 01:58:09.890	59788	60459	61978	63554
2014-10-15 01:58:09.894	59784	60452	61963	63580
2014-10-15 01:58:09.900	59795	60457	61951	63556
2014-10-15 01:58:09.904	59787	60452	61964	63545
2014-10-15 01:58:09.910	59779	60453	61933	63552
2014-10-15 01:58:09.914	59805	60455	61946	63535
2014-10-15 01:58:09.920	59789	60446	61956	63539
2014-10-15 01:58:09.924	59766	60453	61972	63533
2014-10-15 01:58:09.930	59788	60453	61978	63536
2014-10-15 01:58:09.934	59793	60445	61968	63542
2014-10-15 01:58:09.940	59780	60450	61970	63548
2014-10-15 01:58:09.944	59774	60457	61951	63588
2014-10-15 01:58:09.950	59773	60452	61959	63592
2014-10-15 01:58:09.954	59778	60443	61958	63581
2014-10-15 01:58:09.960	59800	60453	61951	63567
2014-10-15 01:58:09.964	59796	60468	61955	63553
2014-10-15 01:58:09.970	59776	60451	61944	63556
2014-10-15 01:58:09.974	59792	60441	61935	63539
2014-10-15 01:58:09.980	59791	60453	61913	63513
2014-10-15 01:58:09.984	59773	60449	61916	63484
2014-10-15 01:58:09.990	59783	60450	61920	63484
2014-10-15 01:58:09.994	59785	60459	61910	63500
2014-10-15 01:58:10.000	59776	60457	61932	63530
2014-10-15 01:58:10.005	59780	60451	61941	63587
2014-10-15 01:58:10.009	59786	60457	61934	63593
2014-10-15 01:58:10.015	59783	60453	61937	63583
2014-10-15 01:58:10.019	59772	60454	61953	63572
2014-10-15 01:58:10.025	59780	60462	61970	63526
2014-10-15 01:58:10.029	59789	60456	61980	63503
2014-10-15 01:58:10.035	59780	60453	61982	63519
2014-10-15 01:58:10.039	59783	60462	61970	63547
2014-10-15 01:58:10.045	59789	60467	61964	63571
2014-10-15 01:58:10.049	59785	60452	61953	63595
2014-10-15 01:58:10.055	59784	60444	61931	63624
2014-10-15 01:58:10.059	59776	60455	61925	63614
2014-10-15 01:58:10.065	59775	60455	61921	63567
2014-10-15 01:58:10.069	59786	60452	61923	63532
2014-10-15 01:58:10.075	59779	60462	61921	63526
2014-10-15 01:58:10.079	59778	60453	61920	63519
2014-10-15 01:58:10.085	59780	60443	61929	63493
2014-10-15 01:58:10.089	59768	60457	61939	63480
2014-10-15 01:58:10.095	59776	60452	61953	63500
2014-10-15 01:58:10.099	59789	60448	61952	63512
2014-10-15 01:58:10.105	59778	60467	61949	63520
2014-10-15 01:58:10.109	59771	60452	61958	63545
2014-10-15 01:58:10.115	59790	60443	61952	63559
2014-10-15 01:58:10.119	59790	60451	61941	63558
2014-10-15 01:58:10.125	59771	60443	61928	63541
2014-10-15 01:58:10.130	59771	60447	61924	63550
2014-10-15 01:58:10.134	59775	60454	61924	63567
2014-10-15 01:58:10.140	59770	60449	61911	63564
2014-10-15 01:58:10.144	59776	60440	61919	63582
2014-10-15 01:58:10.150	59785	60449	61918	63577
2014-10-15 01:58:10.154	59768	60461	61918	63574
2014-10-15 01:58:10.160	59768	60454	61953	63565
2014-10-15 01:58:10.164	59789	60454	61961	63539
2014-10-15 01:58:10.170	59777	60460	61950	63534
2014-10-15 01:58:10.174	59766	60458	61962	63514
2014-10-15 01:58:10.180	59785	60446	61985	63513
2014-10-15 01:58:10.184	59794	60446	61964	63525
2014-10-15 01:58:10.190	59785	60450	61950	63526
2014-10-15 01:58:10.194	59773	60434	61979	63535
2014-10-15 01:58:10.200	59776	60439	61959	63533
2014-10-15 01:58:10.204	59787	60447	61923	63535
2014-10-15 01:58:10.210	59771	60460	61928	63542
2014-10-15 01:58:10.214	59778	60464	61923	63551
2014-10-15 01:58:10.220	59783	60435	61910	63540
2014-10-15 01:58:10.224	59768	60448	61925	63527
2014-10-15 01:58:10.230	59780	60454	61935	63540
2014-10-15 01:58:10.234	59784	60441	61930	63559
2014-10-15 01:58:10.240	59767	60457	61938	63572
2014-10-15 01:58:10.244	59761	60445	61938	63572
2014-10-15 01:58:10.250	59768	60443	61940	63574
2014-10-15 01:58:10.255	59772	60455	61949	63572
2014-10-15 01:58:10.259	59778	60449	61941	63554
2014-10-15 01:58:10.265	59780	60447	61940	63534
2014-10-15 01:58:10.269	59776	60446	61948	63512
2014-10-15 01:58:10.275	59790	60444	61948	63497
2014-10-15 01:58:10.279	59788	60447	61950	63514
2014-10-15 01:58:10.285	59772	60452	61938	63525
2014-10-15 01:58:10.289	59773	60448	61929	63502
2014-10-15 01:58:10.295	59777	60443	61927	63515
2014-10-15 01:58:10.299	59777	60440	61913	63535
2014-10-15 01:58:10.305	59779	60443	61924	63550
2014-10-15 01:58:10.309	59784	60445	61930	63565
2014-10-15 01:58:10.315	59775	60439	61915	63549
2014-10-15 01:58:10.319	59765	60447	61929	63538
2014-10-15 01:58:10.325	59779	60440	61935	63533
2014-10-15 01:58:10.329	59780	60440	61931	63550
2014-10-15 01:58:10.335	59769	60449	61937	63578
2014-10-15 01:58:10.339	59768	60433	61928	63576
2014-10-15 01:58:10.345	59772	60439	61921	63581
2014-10-15 01:58:10.349	59783	60448	61912	63569
2014-10-15 01:58:10.355	59777	60440	61912	63541
2014-10-15 01:58:10.359	59753	60433	61929	63526
2014-10-15 01:58:10.365	59771	60436	61927	63507
2014-10-15 01:58:10.369	59784	60450	61932	63511
2014-10-15 01:58:10.375	59767	60451	61938	63527
2014-10-15 01:58:10.380	59776	60441	61936	63525
2014-10-15 01:58:10.384	59764	60433	61957	63511
2014-10-15 01:58:10.390	59770	60450	61954	63501
2014-10-15 01:58:10.394	59795	60449	61936	63492
2014-10-15 01:58:10.400	59770	60425	61945	63466
2014-10-15 01:58:10.404	59769	60426	61940	63466
2014-10-15 01:58:10.410	59780	60433	61930	63492
2014-10-15 01:58:10.414	59771	60436	61941	63506
2014-10-15 01:58:10.420	59773	60440	61928	63545
2014-10-15 01:58:10.424	59781	60438	61915	63590
2014-10-15 01:58:10.430	59773	60430	61918	63615
2014-10-15 01:58:10.434	59764	60441	61917	63644
2014-10-15 01:58:10.440	59771	60444	61915	63629
2014-10-15 01:58:10.444	59762	60419	61925	63596
2014-10-15 01:58:10.450	59761	60435	61936	63566
2014-10-15 01:58:10.454	59760	60446	61931	63540
2014-10-15 01:58:10.460	59746	60430	61924	63520
2014-10-15 01:58:10.464	59767	60436	61917	63488
2014-10-15 01:58:10.470	59770	60436	61907	63490
2014-10-15 01:58:10.474	59757	60429	61916	63489
2014-10-15 01:58:10.480	59765	60441	61924	63482
2014-10-15 01:58:10.484	59767	60445	61896	63503
2014-10-15 01:58:10.490	59766	60427	61882	63487
2014-10-15 01:58:10.494	59766	60437	61906	63467
2014-10-15 01:58:10.500	59760	60438	61921	63471
2014-10-15 01:58:10.505	59765	60418	61934	63480
2014-10-15 01:58:10.509	59770	60433	61945	63511
2014-10-15 01:58:10.515	59755	60443	61936	63534
2014-10-15 01:58:10.519	59751	60432	61930	63565
2014-10-15 01:58:10.525	59760	60426	61939	63588
2014-10-15 01:58:10.529	59762	60442	61946	63576
2014-10-15 01:58:10.535	59763	60444	61940	63588
2014-10-15 01:58:10.539	59753	60419	61937	63602
2014-10-15 01:58:10.545	59753	60426	61929	63595
2014-10-15 01:58:10.549	59765	60441	61925	63586
2014-10-15 01:58:10.555	59750	60439	61939	63549
2014-10-15 01:58:10.559	59755	60434	61925	63526
2014-10-15 01:58:10.565	59765	60428	61909	63517
2014-10-15 01:58:10.569	59760	60432	61919	63493
2014-10-15 01:58:10.575	59758	60437	61920	63476
2014-10-15 01:58:10.579	59752	60441	61903	63451
2014-10-15 01:58:10.585	59762	60442	61892	63458
2014-10-15 01:58:10.589	59759	60436	61909	63463
2014-10-15 01:58:10.595	59747	60434	61901	63437
2014-10-15 01:58:10.599	59753	60436	61892	63467
2014-10-15 01:58:10.605	59747	60435	61927	63494
2014-10-15 01:58:10.609	59755	60432	61916	63524
2014-10-15 01:58:10.615	59767	60428	61902	63582
2014-10-15 01:58:10.619	59759	60426	61929	63600
2014-10-15 01:58:10.625	59757	60433	61929	63612
2014-10-15 01:58:10.630	59762	60446	61947	63605
2014-10-15 01:58:10.634	59768	60441	61964	63602
2014-10-15 01:58:10.640	59752	60432	61936	63587
2014-10-15 01:58:10.644	59751	60440	61931	63553
2014-10-15 01:58:10.650	59764	60435	61927	63569
2014-10-15 01:58:10.654	59750	60427	61917	63541
2014-10-15 01:58:10.660	59754	60435	61922	63492
2014-10-15 01:58:10.664	59758	60434	61924	63467
2014-10-15 01:58:10.670	59758	60436	61926	63435
2014-10-15 01:58:10.674	59760	60441	61915	63450
2014-10-15 01:58:10.680	59741	60451	61912	63453
2014-10-15 01:58:10.684	59742	60442	61912	63452
2014-10-15 01:58:10.690	59754	60420	61913	63490
2014-10-15 01:58:10.694	59759	60444	61910	63494
2014-10-15 01:58:10.700	59756	60447	61904	63481
2014-10-15 01:58:10.704	59751	60435	61920	63503
2014-10-15 01:58:10.710	59754	60448	61929	63544
2014-10-15 01:58:10.714	59759	60433	61946	63572
2014-10-15 01:58:10.720	59765	60432	61952	63599
2014-10-15 01:58:10.724	59753	60441	61916	63612
2014-10-15 01:58:10.730	59747	60433	61910	63587
2014-10-15 01:58:10.734	59761	60439	61909	63561
2014-10-15 01:58:10.740	59758	60440	61891	63546
2014-10-15 01:58:10.744	59751	60430	61874	63561
2014-10-15 01:58:10.750	59750	60444	61873	63566
2014-10-15 01:58:10.755	59746	60445	61886	63513
2014-10-15 01:58:10.759	59744	60428	61884	63457
2014-10-15 01:58:10.765	59734	60436	61900	63450
2014-10-15 01:58:10.769	59741	60445	61912	63463
2014-10-15 01:58:10.775	59754	60447	61917	63451
2014-10-15 01:58:10.779	59743	60442	61925	63464
2014-10-15 01:58:10.785	59749	60441	61914	63495
2014-10-15 01:58:10.789	59758	60437	61920	63496
2014-10-15 01:58:10.795	59752	60438	61920	63501
2014-10-15 01:58:10.799	59757	60445	61915	63501
2014-10-15 01:58:10.805	59751	60437	61925	63495
2014-10-15 01:58:10.809	59750	60443	61922	63512
2014-10-15 01:58:10.815	59759	60445	61921	63546
2014-10-15 01:58:10.819	59742	60437	61911	63576
2014-10-15 01:58:10.825	59744	60444	61900	63594
2014-10-15 01:58:10.829	59759	60439	61906	63605
2014-10-15 01:58:10.835	59743	60446	61907	63611
2014-10-15 01:58:10.839	59745	60457	61908	63611
2014-10-15 01:58:10.845	59749	60441	61912	63601
2014-10-15 01:58:10.849	59742	60436	61922	63564
2014-10-15 01:58:10.855	59748	60437	61916	63524
2014-10-15 01:58:10.859	59750	60447	61900	63505
2014-10-15 01:58:10.865	59751	60450	61909	63474
2014-10-15 01:58:10.869	59748	60440	61915	63440
2014-10-15 01:58:10.875	59754	60443	61907	63417
2014-10-15 01:58:10.880	59753	60451	61907	63389
2014-10-15 01:58:10.884	59738	60456	61922	63388
2014-10-15 01:58:10.890	59736	60444	61916	63441
2014-10-15 01:58:10.894	59744	60446	61896	63477
2014-10-15 01:58:10.900	59761	60451	61902	63490
2014-10-15 01:58:10.904	59755	60431	61898	63533
2014-10-15 01:58:10.910	59752	60436	61910	63573
2014-10-15 01:58:10.914	59758	60448	61932	63595
2014-10-15 01:58:10.920	59741	60444	61911	63604
2014-10-15 01:58:10.924	59755	60445	61910	63604
2014-10-15 01:58:10.930	59763	60439	61936	63605
2014-10-15 01:58:10.934	59749	60436	61932	63594
2014-10-15 01:58:10.940	59742	60443	61908	63573
2014-10-15 01:58:10.944	59735	60447	61893	63550
2014-10-15 01:58:10.950	59747	60442	61885	63542
2014-10-15 01:58:10.954	59748	60444	61890	63519
2014-10-15 01:58:10.960	59747	60449	61907	63454
2014-10-15 01:58:10.964	59757	60446	61905	63421
2014-10-15 01:58:10.970	59759	60446	61909	63427
2014-10-15 01:58:10.974	59763	60434	61918	63430
2014-10-15 01:58:10.980	59755	60438	61906	63450
2014-10-15 01:58:10.984	59752	60463	61887	63464
2014-10-15 01:58:10.990	59760	60439	61879	63476
2014-10-15 01:58:10.994	59755	60437	61895	63505
2014-10-15 01:58:11.000	59750	60464	61898	63539
2014-10-15 01:58:11.005	59750	60444	61897	63568
2014-10-15 01:58:11.009	59765	60450	61907	63585
2014-10-15 01:58:11.015	59764	60464	61899	63586
2014-10-15 01:58:11.019	59737	60444	61914	63587
2014-10-15 01:58:11.025	59751	60452	61930	63602
2014-10-15 01:58:11.029	59764	60473	61927	63594
2014-10-15 01:58:11.035	59746	60463	61929	63554
2014-10-15 01:58:11.039	59761	60445	61913	63505
2014-10-15 01:58:11.045	59766	60454	61914	63477
2014-10-15 01:58:11.049	59756	60465	61917	63460
2014-10-15 01:58:11.055	59761	60453	61913	63450
2014-10-15 01:58:11.059	59748	60452	61926	63451
2014-10-15 01:58:11.065	59747	60452	61909	63465
2014-10-15 01:58:11.069	59764	60450	61896	63483
2014-10-15 01:58:11.075	59763	60459	61898	63478
2014-10-15 01:58:11.079	59753	60443	61896	63508
2014-10-15 01:58:11.085	59746	60445	61906	63533
2014-10-15 01:58:11.089	59744	60469	61904	63523
2014-10-15 01:58:11.095	59748	60456	61904	63551
2014-10-15 01:58:11.099	59761	60456	61892	63564
2014-10-15 01:58:11.105	59765	60455	61894	63574
2014-10-15 01:58:11.109	59767	60452	61907	63584
2014-10-15 01:58:11.115	59763	60465	61896	63556
2014-10-15 01:58:11.119	59751	60453	61906	63545
2014-10-15 01:58:11.125	59758	60468	61912	63523
2014-10-15 01:58:11.130	59757	60474	61914	63501
2014-10-15 01:58:11.134	59754	60453	61926	63510
2014-10-15 01:58:11.140	59764	60466	61921	63512
2014-10-15 01:58:11.144	59760	60462	61912	63519
2014-10-15 01:58:11.150	59761	60449	61900	63513
2014-10-15 01:58:11.154	59775	60458	61909	63492
2014-10-15 01:58:11.160	59766	60465	61927	63499
2014-10-15 01:58:11.164	59753	60469	61918	63498
2014-10-15 01:58:11.170	59762	60467	61915	63485
2014-10-15 01:58:11.174	59752	60460	61922	63511
2014-10-15 01:58:11.180	59754	60456	61917	63516
2014-10-15 01:58:11.184	59774	60461	61908	63503
2014-10-15 01:58:11.190	59761	60453	61904	63507
2014-10-15 01:58:11.194	59752	60456	61910	63506
2014-10-15 01:58:11.200	59769	60471	61921	63539
2014-10-15 01:58:11.204	59764	60460	61926	63580
2014-10-15 01:58:11.210	59758	60453	61910	63581
2014-10-15 01:58:11.214	59778	60468	61907	63577
2014-10-15 01:58:11.220	59767	60467	61926	63563
2014-10-15 01:58:11.224	59753	60449	61916	63540
2014-10-15 01:58:11.230	59767	60454	61909	63532
2014-10-15 01:58:11.234	59778	60472	61917	63521
2014-10-15 01:58:11.240	59776	60469	61895	63506
2014-10-15 01:58:11.244	59751	60464	61886	63512
2014-10-15 01:58:11.250	59762	60466	61898	63517
2014-10-15 01:58:11.255	59773	60467	61901	63501
2014-10-15 01:58:11.259	59759	60467	61896	63482
2014-10-15 01:58:11.265	59772	60466	61884	63506
2014-10-15 01:58:11.269	59764	60472	61881	63534
2014-10-15 01:58:11.275	59766	60481	61896	63516
2014-10-15 01:58:11.279	59779	60477	61891	63528
2014-10-15 01:58:11.285	59764	60454	61904	63542
2014-10-15 01:58:11.289	59759	60453	61923	63531
2014-10-15 01:58:11.295	59764	60469	61906	63534
2014-10-15 01:58:11.299	59770	60471	61915	63513
2014-10-15 01:58:11.305	59767	60476	61930	63503
2014-10-15 01:58:11.309	59774	60465	61935	63515
2014-10-15 01:58:11.315	59781	60472	61952	63530
2014-10-15 01:58:11.319	59772	60474	61942	63571
2014-10-15 01:58:11.325	59774	60455	61928	63576
2014-10-15 01:58:11.329	59770	60476	61936	63552
2014-10-15 01:58:11.335	59774	60478	61935	63538
2014-10-15 01:58:11.339	59779	60466	61926	63528
2014-10-15 01:58:11.345	59769	60477	61925	63520
2014-10-15 01:58:11.349	59765	60471	61924	63507
2014-10-15 01:58:11.355	59763	60473	61898	63514
2014-10-15 01:58:11.359	59779	60479	61893	63495
2014-10-15 01:58:11.365	59783	60473	61915	63458
2014-10-15 01:58:11.369	59770	60474	61920	63477
2014-10-15 01:58:11.375	59773	60479	61910	63501
2014-10-15 01:58:11.380	59783	60472	61917	63512
2014-10-15 01:58:11.384	59783	60471	61924	63543
2014-10-15 01:58:11.390	59761	60470	61912	63582
2014-10-15 01:58:11.394	59753	60470	61919	63594
2014-10-15 01:58:11.400	59771	60484	61921	63584
2014-10-15 01:58:11.404	59775	60478	61916	63575
2014-10-15 01:58:11.410	59779	60470	61922	63535
2014-10-15 01:58:11.414	59777	60474	61912	63519
2014-10-15 01:58:11.420	59771	60472	61904	63530
2014-10-15 01:58:11.424	59777	60478	61903	63525
2014-10-15 01:58:11.430	59776	60473	61909	63544
2014-10-15 01:58:11.434	59769	60469	61912	63555
2014-10-15 01:58:11.440	59753	60479	61917	63534
2014-10-15 01:58:11.444	59770	60468	61931	63519
2014-10-15 01:58:11.450	59788	60463	61926	63521
2014-10-15 01:58:11.454	59776	60468	61924	63513
2014-10-15 01:58:11.460	59781	60478	61927	63502
2014-10-15 01:58:11.464	59773	60488	61933	63510
2014-10-15 01:58:11.470	59771	60474	61940	63508
2014-10-15 01:58:11.474	59787	60467	61928	63503
2014-10-15 01:58:11.480	59775	60476	61930	63517
2014-10-15 01:58:11.484	59771	60479	61943	63547
2014-10-15 01:58:11.490	59780	60478	61921	63549
2014-10-15 01:58:11.494	59771	60478	61914	63530
2014-10-15 01:58:11.500	59777	60476	61933	63547
2014-10-15 01:58:11.505	59778	60469	61917	63572
2014-10-15 01:58:11.509	59771	60468	61901	63575
2014-10-15 01:58:11.515	59778	60476	61919	63585
2014-10-15 01:58:11.519	59777	60481	61927	63599
2014-10-15 01:58:11.525	59777	60469	61910	63572
2014-10-15 01:58:11.529	59773	60469	61904	63543
2014-10-15 01:58:11.535	59771	60494	61923	63554
2014-10-15 01:58:11.539	59772	60487	61927	63552
2014-10-15 01:58:11.545	59777	60476	61920	63548
2014-10-15 01:58:11.549	59776	60482	61928	63549
2014-10-15 01:58:11.555	59777	60478	61930	63523
2014-10-15 01:58:11.559	59797	60473	61931	63481
2014-10-15 01:58:11.565	59788	60474	61942	63448
2014-10-15 01:58:11.569	59780	60479	61926	63431
2014-10-15 01:58:11.575	59787	60473	61916	63449
2014-10-15 01:58:11.579	59776	60477	61916	63501
2014-10-15 01:58:11.585	59785	60492	61901	63538
2014-10-15 01:58:11.589	59790	60489	61905	63568
2014-10-15 01:58:11.595	59795	60475	61901	63589
2014-10-15 01:58:11.599	59789	60473	61899	63610
2014-10-15 01:58:11.605	59773	60482	61909	63624
2014-10-15 01:58:11.609	59786	60486	61917	63602
2014-10-15 01:58:11.615	59787	60489	61933	63570
2014-10-15 01:58:11.619	59781	60477	61920	63548
2014-10-15 01:58:11.625	59787	60466	61915	63565
2014-10-15 01:58:11.630	59783	60480	61930	63563
2014-10-15 01:58:11.634	59779	60477	61926	63509
2014-10-15 01:58:11.640	59779	60470	61936	63485
2014-10-15 01:58:11.644	59773	60481	61948	63479
2014-10-15 01:58:11.650	59778	60482	61944	63475
2014-10-15 01:58:11.654	59796	60483	61934	63497
2014-10-15 01:58:11.660	59782	60484	61922	63520
2014-10-15 01:58:11.664	59771	60475	61931	63529
2014-10-15 01:58:11.670	59785	60475	61920	63526
2014-10-15 01:58:11.674	59783	60476	61904	63550
2014-10-15 01:58:11.680	59785	60475	61920	63584
2014-10-15 01:58:11.684	59789	60474	61911	63558
2014-10-15 01:58:11.690	59777	60473	61902	63533
2014-10-15 01:58:11.694	59782	60480	61919	63542
2014-10-15 01:58:11.700	59787	60475	61923	63550
2014-10-15 01:58:11.704	59785	60468	61929	63568
2014-10-15 01:58:11.710	59787	60474	61932	63569
2014-10-15 01:58:11.714	59786	60476	61924	63551
2014-10-15 01:58:11.720	59781	60468	61926	63535
2014-10-15 01:58:11.724	59776	60476	61916	63532
2014-10-15 01:58:11.730	59779	60483	61914	63527
2014-10-15 01:58:11.734	59770	60467	61939	63496
2014-10-15 01:58:11.740	59785	60477	61925	63490
2014-10-15 01:58:11.744	59801	60487	61904	63493
2014-10-15 01:58:11.750	59786	60475	61918	63517
2014-10-15 01:58:11.755	59790	60482	61935	63552
2014-10-15 01:58:11.759	59785	60488	61956	63548
2014-10-15 01:58:11.765	59784	60488	61947	63585
2014-10-15 01:58:11.769	59783	60492	61940	63622
2014-10-15 01:58:11.775	59782	60486	61958	63615
2014-10-15 01:58:11.779	59788	60483	61941	63592
2014-10-15 01:58:11.785	59773	60478	61929	63554
2014-10-15 01:58:11.789	59786	60469	61942	63529
2014-10-15 01:58:11.795	59785	60471	61937	63492
2014-10-15 01:58:11.799	59778	60475	61936	63484
2014-10-15 01:58:11.805	59791	60477	61941	63526
2014-10-15 01:58:11.809	59777	60473	61936	63545
2014-10-15 01:58:11.815	59788	60481	61934	63533
2014-10-15 01:58:11.819	59785	60481	61931	63528
2014-10-15 01:58:11.825	59769	60464	61920	63545
2014-10-15 01:58:11.829	59775	60483	61924	63531
2014-10-15 01:58:11.835	59786	60484	61933	63514
2014-10-15 01:58:11.839	59786	60473	61926	63507
2014-10-15 01:58:11.845	59773	60490	61926	63516
2014-10-15 01:58:11.849	59792	60476	61925	63544
2014-10-15 01:58:11.855	59789	60489	61912	63546
2014-10-15 01:58:11.859	59771	60498	61927	63573
2014-10-15 01:58:11.865	59784	60466	61932	63592
2014-10-15 01:58:11.869	59775	60486	61922	63572
2014-10-15 01:58:11.875	59782	60499	61935	63561
2014-10-15 01:58:11.880	59791	60474	61925	63545
2014-10-15 01:58:11.884	59786	60476	61926	63505
2014-10-15 01:58:11.890	59785	60486	61937	63482
2014-10-15 01:58:11.894	59774	60484	61930	63506
2014-10-15 01:58:11.900	59779	60479	61939	63529
2014-10-15 01:58:11.904	59782	60483	61949	63548
2014-10-15 01:58:11.910	59782	60491	61941	63565
2014-10-15 01:58:11.914	59781	60479	61919	63554
2014-10-15 01:58:11.920	59784	60470	61911	63543
2014-10-15 01:58:11.924	59786	60479	61925	63529
2014-10-15 01:58:11.930	59783	60474	61930	63534
2014-10-15 01:58:11.934	59787	60480	61925	63571
2014-10-15 01:58:11.940	59786	60479	61910	63584
2014-10-15 01:58:11.944	59791	60464	61897	63575
2014-10-15 01:58:11.950	59793	60478	61916	63566
2014-10-15 01:58:11.954	59782	60478	61941	63540
2014-10-15 01:58:11.960	59777	60465	61953	63505
2014-10-15 01:58:11.964	59787	60477	61960	63460
2014-10-15 01:58:11.970	59793	60485	61959	63449
2014-10-15 01:58:11.974	59774	60479	61950	63471
2014-10-15 01:58:11.980	59774	60479	61941	63477
2014-10-15 01:58:11.984	59791	60482	61958	63515
2014-10-15 01:58:11.990	59789	60477	61976	63556
2014-10-15 01:58:11.994	59791	60485	61952	63555
[truncated: 10,800 more rows]
