# Supplementary material for: Seismic monitoring of small alpine rockfalls – validity, precision and limitations
Source: Copernicus journal article supplement (doi:10.5194/esurf-5-653-2017), 2017-10-16
Supplement: Supplementary file 2 [file esurf-5-653-2017-supplement.zip › event_3.txt]

Time	LAU02	LAU03	LAU04	LAU05
2014-10-20 19:10:39.005	64247	58866	64059	69627
2014-10-20 19:10:39.009	64228	58858	64076	69638
2014-10-20 19:10:39.015	64236	58859	64072	69650
2014-10-20 19:10:39.019	64268	58877	64051	69623
2014-10-20 19:10:39.025	64243	58871	64065	69608
2014-10-20 19:10:39.029	64234	58854	64088	69626
2014-10-20 19:10:39.035	64255	58867	64071	69655
2014-10-20 19:10:39.039	64240	58874	64045	69662
2014-10-20 19:10:39.045	64244	58864	64037	69633
2014-10-20 19:10:39.049	64245	58861	64032	69616
2014-10-20 19:10:39.055	64252	58870	64037	69617
2014-10-20 19:10:39.059	64251	58867	64045	69627
2014-10-20 19:10:39.065	64229	58848	64047	69630
2014-10-20 19:10:39.069	64257	58864	64049	69624
2014-10-20 19:10:39.075	64260	58880	64050	69618
2014-10-20 19:10:39.079	64238	58846	64070	69612
2014-10-20 19:10:39.085	64250	58862	64082	69612
2014-10-20 19:10:39.089	64250	58882	64065	69609
2014-10-20 19:10:39.095	64242	58858	64065	69608
2014-10-20 19:10:39.099	64253	58877	64077	69625
2014-10-20 19:10:39.105	64271	58872	64099	69649
2014-10-20 19:10:39.109	64262	58859	64109	69654
2014-10-20 19:10:39.115	64251	58874	64089	69665
2014-10-20 19:10:39.119	64253	58876	64081	69692
2014-10-20 19:10:39.125	64255	58880	64074	69673
2014-10-20 19:10:39.130	64253	58879	64055	69651
2014-10-20 19:10:39.134	64248	58876	64040	69640
2014-10-20 19:10:39.140	64264	58878	64045	69610
2014-10-20 19:10:39.144	64265	58880	64041	69591
2014-10-20 19:10:39.150	64247	58875	64020	69586
2014-10-20 19:10:39.154	64250	58871	64025	69599
2014-10-20 19:10:39.160	64256	58867	64034	69622
2014-10-20 19:10:39.164	64260	58872	64051	69618
2014-10-20 19:10:39.170	64245	58871	64062	69600
2014-10-20 19:10:39.174	64249	58867	64036	69606
2014-10-20 19:10:39.180	64264	58887	64032	69613
2014-10-20 19:10:39.184	64251	58884	64051	69625
2014-10-20 19:10:39.190	64263	58878	64059	69650
2014-10-20 19:10:39.194	64263	58882	64073	69670
2014-10-20 19:10:39.200	64260	58873	64087	69683
2014-10-20 19:10:39.204	64263	58880	64089	69676
2014-10-20 19:10:39.210	64242	58883	64078	69663
2014-10-20 19:10:39.214	64255	58867	64069	69636
2014-10-20 19:10:39.220	64268	58871	64071	69640
2014-10-20 19:10:39.224	64258	58884	64066	69656
2014-10-20 19:10:39.230	64254	58883	64068	69639
2014-10-20 19:10:39.234	64262	58885	64087	69660
2014-10-20 19:10:39.240	64266	58885	64095	69692
2014-10-20 19:10:39.244	64254	58881	64095	69700
2014-10-20 19:10:39.250	64261	58879	64104	69676
2014-10-20 19:10:39.255	64269	58872	64104	69652
2014-10-20 19:10:39.259	64260	58883	64083	69620
2014-10-20 19:10:39.265	64256	58887	64063	69564
2014-10-20 19:10:39.269	64261	58876	64058	69544
2014-10-20 19:10:39.275	64256	58884	64055	69541
2014-10-20 19:10:39.279	64253	58888	64049	69557
2014-10-20 19:10:39.285	64271	58883	64061	69576
2014-10-20 19:10:39.289	64279	58882	64083	69584
2014-10-20 19:10:39.295	64264	58881	64093	69604
2014-10-20 19:10:39.299	64252	58887	64081	69624
2014-10-20 19:10:39.305	64259	58894	64051	69688
2014-10-20 19:10:39.309	64271	58895	64053	69734
2014-10-20 19:10:39.315	64264	58890	64078	69741
2014-10-20 19:10:39.319	64265	58888	64090	69743
2014-10-20 19:10:39.325	64276	58878	64103	69721
2014-10-20 19:10:39.329	64257	58874	64100	69735
2014-10-20 19:10:39.335	64260	58903	64083	69739
2014-10-20 19:10:39.339	64266	58889	64084	69692
2014-10-20 19:10:39.345	64262	58876	64090	69645
2014-10-20 19:10:39.349	64257	58894	64083	69611
2014-10-20 19:10:39.355	64255	58893	64065	69581
2014-10-20 19:10:39.359	64268	58892	64048	69549
2014-10-20 19:10:39.365	64258	58882	64046	69559
2014-10-20 19:10:39.369	64266	58886	64047	69580
2014-10-20 19:10:39.375	64269	58903	64043	69605
2014-10-20 19:10:39.380	64257	58889	64064	69649
2014-10-20 19:10:39.384	64269	58890	64085	69662
2014-10-20 19:10:39.390	64277	58904	64079	69673
2014-10-20 19:10:39.394	64268	58907	64072	69676
2014-10-20 19:10:39.400	64249	58906	64074	69651
2014-10-20 19:10:39.404	64275	58897	64084	69629
2014-10-20 19:10:39.410	64284	58898	64088	69609
2014-10-20 19:10:39.414	64259	58897	64076	69617
2014-10-20 19:10:39.420	64266	58897	64068	69633
2014-10-20 19:10:39.424	64269	58902	64074	69653
2014-10-20 19:10:39.430	64274	58899	64069	69685
2014-10-20 19:10:39.434	64274	58907	64054	69681
2014-10-20 19:10:39.440	64271	58897	64047	69669
2014-10-20 19:10:39.444	64282	58894	64066	69660
2014-10-20 19:10:39.450	64276	58906	64096	69672
2014-10-20 19:10:39.454	64270	58900	64095	69712
2014-10-20 19:10:39.460	64272	58897	64089	69717
2014-10-20 19:10:39.464	64266	58889	64100	69729
2014-10-20 19:10:39.470	64271	58906	64089	69727
2014-10-20 19:10:39.474	64288	58910	64058	69681
2014-10-20 19:10:39.480	64288	58891	64067	69644
2014-10-20 19:10:39.484	64278	58911	64100	69583
2014-10-20 19:10:39.490	64272	58914	64101	69553
2014-10-20 19:10:39.494	64281	58898	64081	69581
2014-10-20 19:10:39.500	64283	58908	64077	69600
2014-10-20 19:10:39.505	64280	58907	64090	69623
2014-10-20 19:10:39.509	64276	58906	64091	69634
2014-10-20 19:10:39.515	64282	58928	64088	69624
2014-10-20 19:10:39.519	64299	58914	64086	69616
2014-10-20 19:10:39.525	64276	58904	64079	69626
2014-10-20 19:10:39.529	64273	58925	64078	69678
2014-10-20 19:10:39.535	64295	58904	64071	69740
2014-10-20 19:10:39.539	64277	58906	64072	69763
2014-10-20 19:10:39.545	64263	58923	64083	69746
2014-10-20 19:10:39.549	64268	58906	64072	69708
2014-10-20 19:10:39.555	64282	58914	64061	69687
2014-10-20 19:10:39.559	64283	58919	64074	69688
2014-10-20 19:10:39.565	64265	58911	64078	69661
2014-10-20 19:10:39.569	64279	58908	64069	69646
2014-10-20 19:10:39.575	64284	58912	64061	69646
2014-10-20 19:10:39.579	64277	58917	64061	69627
2014-10-20 19:10:39.585	64282	58897	64098	69626
2014-10-20 19:10:39.589	64284	58895	64118	69616
2014-10-20 19:10:39.595	64280	58915	64105	69594
2014-10-20 19:10:39.599	64273	58917	64111	69612
2014-10-20 19:10:39.605	64288	58912	64129	69629
2014-10-20 19:10:39.609	64284	58909	64141	69638
2014-10-20 19:10:39.615	64264	58914	64135	69673
2014-10-20 19:10:39.619	64277	58929	64110	69710
2014-10-20 19:10:39.625	64294	58919	64088	69726
2014-10-20 19:10:39.630	64279	58921	64078	69715
2014-10-20 19:10:39.634	64257	58919	64081	69693
2014-10-20 19:10:39.640	64291	58898	64073	69690
2014-10-20 19:10:39.644	64309	58920	64061	69676
2014-10-20 19:10:39.650	64265	58924	64071	69656
2014-10-20 19:10:39.654	64272	58911	64063	69648
2014-10-20 19:10:39.660	64309	58919	64047	69653
2014-10-20 19:10:39.664	64305	58917	64051	69661
2014-10-20 19:10:39.670	64282	58928	64062	69661
2014-10-20 19:10:39.674	64281	58920	64094	69674
2014-10-20 19:10:39.680	64291	58909	64105	69665
2014-10-20 19:10:39.684	64290	58927	64102	69650
2014-10-20 19:10:39.690	64282	58925	64120	69641
2014-10-20 19:10:39.694	64289	58914	64111	69629
2014-10-20 19:10:39.700	64282	58932	64097	69652
2014-10-20 19:10:39.704	64266	58939	64106	69649
2014-10-20 19:10:39.710	64297	58926	64106	69620
2014-10-20 19:10:39.714	64307	58935	64109	69623
2014-10-20 19:10:39.720	64271	58933	64112	69656
2014-10-20 19:10:39.724	64272	58921	64106	69704
2014-10-20 19:10:39.730	64302	58921	64104	69745
2014-10-20 19:10:39.734	64289	58916	64094	69776
2014-10-20 19:10:39.740	64273	58927	64091	69778
2014-10-20 19:10:39.744	64290	58924	64096	69740
2014-10-20 19:10:39.750	64291	58915	64098	69690
2014-10-20 19:10:39.755	64283	58926	64094	69661
2014-10-20 19:10:39.759	64285	58919	64072	69636
2014-10-20 19:10:39.765	64298	58918	64059	69623
2014-10-20 19:10:39.769	64290	58928	64068	69625
2014-10-20 19:10:39.775	64269	58923	64065	69618
2014-10-20 19:10:39.779	64286	58912	64069	69634
2014-10-20 19:10:39.785	64295	58921	64092	69643
2014-10-20 19:10:39.789	64281	58925	64106	69637
2014-10-20 19:10:39.795	64280	58918	64108	69655
2014-10-20 19:10:39.799	64293	58927	64110	69688
2014-10-20 19:10:39.805	64292	58916	64103	69722
2014-10-20 19:10:39.809	64287	58918	64101	69737
2014-10-20 19:10:39.815	64292	58928	64102	69745
2014-10-20 19:10:39.819	64292	58930	64101	69728
2014-10-20 19:10:39.825	64302	58931	64112	69700
2014-10-20 19:10:39.829	64293	58923	64112	69681
2014-10-20 19:10:39.835	64280	58932	64112	69656
2014-10-20 19:10:39.839	64290	58918	64107	69661
2014-10-20 19:10:39.845	64296	58917	64111	69668
2014-10-20 19:10:39.849	64283	58934	64118	69657
2014-10-20 19:10:39.855	64279	58921	64102	69655
2014-10-20 19:10:39.859	64294	58930	64112	69665
2014-10-20 19:10:39.865	64303	58927	64109	69646
2014-10-20 19:10:39.869	64301	58927	64096	69628
2014-10-20 19:10:39.875	64290	58925	64121	69638
2014-10-20 19:10:39.880	64300	58908	64098	69644
2014-10-20 19:10:39.884	64291	58936	64062	69665
2014-10-20 19:10:39.890	64279	58938	64073	69679
2014-10-20 19:10:39.894	64302	58922	64081	69683
2014-10-20 19:10:39.900	64295	58923	64093	69699
2014-10-20 19:10:39.904	64284	58921	64089	69709
2014-10-20 19:10:39.910	64292	58930	64072	69723
2014-10-20 19:10:39.914	64300	58923	64086	69727
2014-10-20 19:10:39.920	64303	58921	64095	69719
2014-10-20 19:10:39.924	64293	58941	64087	69730
2014-10-20 19:10:39.930	64287	58940	64089	69750
2014-10-20 19:10:39.934	64302	58922	64094	69719
2014-10-20 19:10:39.940	64298	58914	64090	69673
2014-10-20 19:10:39.944	64274	58923	64101	69641
2014-10-20 19:10:39.950	64301	58926	64101	69609
2014-10-20 19:10:39.954	64302	58921	64094	69605
2014-10-20 19:10:39.960	64291	58931	64100	69609
2014-10-20 19:10:39.964	64310	58935	64102	69661
2014-10-20 19:10:39.970	64295	58912	64120	69696
2014-10-20 19:10:39.974	64298	58931	64111	69678
2014-10-20 19:10:39.980	64296	58934	64102	69695
2014-10-20 19:10:39.984	64296	58899	64134	69687
2014-10-20 19:10:39.990	64309	58921	64136	69681
2014-10-20 19:10:39.994	64290	58929	64139	69683
2014-10-20 19:10:40.000	64295	58916	64127	69682
2014-10-20 19:10:40.005	64299	58930	64093	69696
2014-10-20 19:10:40.009	64284	58933	64095	69669
2014-10-20 19:10:40.015	64292	58939	64091	69674
2014-10-20 19:10:40.019	64311	58935	64091	69706
2014-10-20 19:10:40.025	64305	58929	64098	69745
2014-10-20 19:10:40.029	64290	58939	64096	69793
2014-10-20 19:10:40.035	64292	58926	64093	69785
2014-10-20 19:10:40.039	64304	58920	64098	69741
2014-10-20 19:10:40.045	64300	58924	64120	69656
2014-10-20 19:10:40.049	64293	58928	64112	69589
2014-10-20 19:10:40.055	64300	58925	64087	69598
2014-10-20 19:10:40.059	64305	58915	64065	69609
2014-10-20 19:10:40.065	64307	58946	64041	69629
2014-10-20 19:10:40.069	64289	58941	64046	69663
2014-10-20 19:10:40.075	64292	58921	64062	69667
2014-10-20 19:10:40.079	64303	58950	64078	69683
2014-10-20 19:10:40.085	64289	58938	64077	69694
2014-10-20 19:10:40.089	64296	58930	64055	69672
2014-10-20 19:10:40.095	64303	58935	64059	69661
2014-10-20 19:10:40.099	64303	58930	64081	69678
2014-10-20 19:10:40.105	64294	58924	64094	69727
2014-10-20 19:10:40.109	64298	58921	64083	69728
2014-10-20 19:10:40.115	64309	58938	64097	69710
2014-10-20 19:10:40.119	64292	58932	64134	69722
2014-10-20 19:10:40.125	64297	58926	64146	69687
2014-10-20 19:10:40.130	64296	58936	64147	69672
2014-10-20 19:10:40.134	64304	58924	64137	69685
2014-10-20 19:10:40.140	64319	58921	64118	69681
2014-10-20 19:10:40.144	64303	58940	64103	69709
2014-10-20 19:10:40.150	64305	58938	64086	69734
2014-10-20 19:10:40.154	64309	58940	64070	69729
2014-10-20 19:10:40.160	64302	58940	64058	69724
2014-10-20 19:10:40.164	64282	58932	64062	69709
2014-10-20 19:10:40.170	64291	58938	64069	69684
2014-10-20 19:10:40.174	64309	58936	64063	69657
2014-10-20 19:10:40.180	64294	58935	64083	69625
2014-10-20 19:10:40.184	64302	58927	64102	69630
2014-10-20 19:10:40.190	64307	58929	64106	69639
2014-10-20 19:10:40.194	64304	58943	64119	69650
2014-10-20 19:10:40.200	64294	58930	64113	69686
2014-10-20 19:10:40.204	64287	58924	64125	69693
2014-10-20 19:10:40.210	64301	58934	64143	69680
2014-10-20 19:10:40.214	64291	58937	64131	69655
2014-10-20 19:10:40.220	64290	58937	64122	69668
2014-10-20 19:10:40.224	64306	58937	64110	69688
2014-10-20 19:10:40.230	64313	58931	64121	69696
2014-10-20 19:10:40.234	64306	58933	64134	69749
2014-10-20 19:10:40.240	64299	58940	64110	69765
2014-10-20 19:10:40.244	64299	58937	64091	69742
2014-10-20 19:10:40.250	64301	58923	64081	69713
2014-10-20 19:10:40.255	64313	58916	64096	69683
2014-10-20 19:10:40.259	64299	58934	64102	69676
2014-10-20 19:10:40.265	64292	58928	64072	69655
2014-10-20 19:10:40.269	64317	58919	64072	69651
2014-10-20 19:10:40.275	64316	58934	64081	69651
2014-10-20 19:10:40.279	64302	58939	64069	69655
2014-10-20 19:10:40.285	64296	58941	64074	69677
2014-10-20 19:10:40.289	64297	58927	64098	69672
2014-10-20 19:10:40.295	64294	58929	64071	69705
2014-10-20 19:10:40.299	64293	58946	64047	69710
2014-10-20 19:10:40.305	64297	58933	64097	69671
2014-10-20 19:10:40.309	64306	58933	64127	69694
2014-10-20 19:10:40.315	64300	58927	64107	69701
2014-10-20 19:10:40.319	64293	58919	64101	69730
2014-10-20 19:10:40.325	64317	58944	64109	69787
2014-10-20 19:10:40.329	64302	58926	64113	69776
2014-10-20 19:10:40.335	64298	58910	64101	69744
2014-10-20 19:10:40.339	64309	58940	64091	69714
2014-10-20 19:10:40.345	64286	58934	64097	69674
2014-10-20 19:10:40.349	64303	58927	64112	69623
2014-10-20 19:10:40.355	64311	58939	64114	69610
2014-10-20 19:10:40.359	64292	58940	64100	69630
2014-10-20 19:10:40.365	64302	58925	64114	69637
2014-10-20 19:10:40.369	64313	58924	64114	69645
2014-10-20 19:10:40.375	64308	58938	64081	69632
2014-10-20 19:10:40.380	64305	58927	64075	69631
2014-10-20 19:10:40.384	64301	58938	64079	69690
2014-10-20 19:10:40.390	64315	58944	64072	69717
2014-10-20 19:10:40.394	64310	58923	64065	69731
2014-10-20 19:10:40.400	64292	58943	64070	69754
2014-10-20 19:10:40.404	64302	58951	64079	69706
2014-10-20 19:10:40.410	64287	58926	64080	69677
2014-10-20 19:10:40.414	64287	58929	64089	69689
2014-10-20 19:10:40.420	64310	58949	64105	69704
2014-10-20 19:10:40.424	64307	58947	64108	69725
2014-10-20 19:10:40.430	64305	58927	64083	69718
2014-10-20 19:10:40.434	64306	58932	64080	69718
2014-10-20 19:10:40.440	64311	58945	64097	69718
2014-10-20 19:10:40.444	64298	58937	64069	69710
2014-10-20 19:10:40.450	64295	58930	64079	69710
2014-10-20 19:10:40.454	64307	58945	64117	69686
2014-10-20 19:10:40.460	64298	58946	64116	69632
2014-10-20 19:10:40.464	64294	58926	64112	69597
2014-10-20 19:10:40.470	64305	58936	64114	69600
2014-10-20 19:10:40.474	64306	58942	64136	69614
2014-10-20 19:10:40.480	64290	58931	64116	69650
2014-10-20 19:10:40.484	64296	58933	64093	69675
2014-10-20 19:10:40.490	64306	58935	64107	69698
2014-10-20 19:10:40.494	64300	58945	64090	69710
2014-10-20 19:10:40.500	64297	58941	64095	69700
2014-10-20 19:10:40.505	64290	58937	64098	69708
2014-10-20 19:10:40.509	64311	58938	64093	69686
2014-10-20 19:10:40.515	64298	58936	64116	69695
2014-10-20 19:10:40.519	64273	58939	64105	69737
2014-10-20 19:10:40.525	64309	58930	64080	69745
2014-10-20 19:10:40.529	64308	58933	64086	69763
2014-10-20 19:10:40.535	64288	58942	64089	69746
2014-10-20 19:10:40.539	64311	58937	64082	69708
2014-10-20 19:10:40.545	64311	58935	64079	69694
2014-10-20 19:10:40.549	64289	58926	64072	69687
2014-10-20 19:10:40.555	64285	58934	64056	69658
2014-10-20 19:10:40.559	64308	58945	64039	69649
2014-10-20 19:10:40.565	64303	58928	64046	69659
2014-10-20 19:10:40.569	64280	58928	64061	69633
2014-10-20 19:10:40.575	64298	58946	64071	69617
2014-10-20 19:10:40.579	64294	58946	64086	69639
2014-10-20 19:10:40.585	64295	58939	64096	69664
2014-10-20 19:10:40.589	64299	58931	64111	69687
2014-10-20 19:10:40.595	64288	58934	64121	69712
2014-10-20 19:10:40.599	64293	58944	64104	69700
2014-10-20 19:10:40.605	64293	58933	64096	69675
2014-10-20 19:10:40.609	64294	58922	64106	69693
2014-10-20 19:10:40.615	64285	58945	64116	69695
2014-10-20 19:10:40.619	64296	58954	64113	69686
2014-10-20 19:10:40.625	64304	58938	64097	69675
2014-10-20 19:10:40.630	64286	58933	64100	69666
2014-10-20 19:10:40.634	64295	58939	64093	69696
2014-10-20 19:10:40.640	64309	58940	64090	69720
2014-10-20 19:10:40.644	64291	58939	64101	69729
2014-10-20 19:10:40.650	64272	58938	64085	69719
2014-10-20 19:10:40.654	64302	58930	64082	69692
2014-10-20 19:10:40.660	64306	58935	64087	69665
2014-10-20 19:10:40.664	64287	58937	64090	69660
2014-10-20 19:10:40.670	64294	58925	64106	69677
2014-10-20 19:10:40.674	64299	58935	64091	69686
2014-10-20 19:10:40.680	64299	58941	64077	69684
2014-10-20 19:10:40.684	64280	58929	64081	69669
2014-10-20 19:10:40.690	64293	58944	64068	69652
2014-10-20 19:10:40.694	64306	58954	64062	69647
2014-10-20 19:10:40.700	64294	58939	64087	69648
2014-10-20 19:10:40.704	64287	58942	64085	69647
2014-10-20 19:10:40.710	64284	58941	64063	69672
2014-10-20 19:10:40.714	64305	58930	64091	69691
2014-10-20 19:10:40.720	64300	58939	64105	69698
2014-10-20 19:10:40.724	64296	58941	64071	69738
2014-10-20 19:10:40.730	64309	58937	64067	69743
2014-10-20 19:10:40.734	64300	58943	64091	69703
2014-10-20 19:10:40.740	64295	58932	64098	69682
2014-10-20 19:10:40.744	64297	58931	64083	69667
2014-10-20 19:10:40.750	64307	58938	64071	69654
2014-10-20 19:10:40.755	64301	58936	64082	69641
2014-10-20 19:10:40.759	64292	58947	64089	69631
2014-10-20 19:10:40.765	64292	58947	64077	69638
2014-10-20 19:10:40.769	64295	58944	64042	69659
2014-10-20 19:10:40.775	64305	58939	64047	69668
2014-10-20 19:10:40.779	64274	58938	64070	69678
2014-10-20 19:10:40.785	64281	58942	64040	69690
2014-10-20 19:10:40.789	64304	58931	64037	69678
2014-10-20 19:10:40.795	64287	58930	64064	69688
2014-10-20 19:10:40.799	64280	58932	64080	69701
2014-10-20 19:10:40.805	64289	58926	64079	69692
2014-10-20 19:10:40.809	64306	58928	64060	69685
2014-10-20 19:10:40.815	64289	58939	64067	69689
2014-10-20 19:10:40.819	64285	58940	64073	69693
2014-10-20 19:10:40.825	64295	58927	64072	69686
2014-10-20 19:10:40.829	64285	58933	64096	69699
2014-10-20 19:10:40.835	64282	58938	64094	69694
2014-10-20 19:10:40.839	64287	58924	64079	69656
2014-10-20 19:10:40.845	64303	58941	64093	69645
2014-10-20 19:10:40.849	64288	58947	64093	69638
2014-10-20 19:10:40.855	64283	58929	64088	69629
2014-10-20 19:10:40.859	64304	58935	64105	69634
2014-10-20 19:10:40.865	64292	58935	64100	69632
2014-10-20 19:10:40.869	64279	58935	64092	69640
2014-10-20 19:10:40.875	64287	58944	64080	69669
2014-10-20 19:10:40.880	64303	58941	64068	69691
2014-10-20 19:10:40.884	64297	58930	64087	69722
2014-10-20 19:10:40.890	64286	58934	64087	69728
2014-10-20 19:10:40.894	64285	58930	64071	69701
2014-10-20 19:10:40.900	64293	58934	64066	69705
2014-10-20 19:10:40.904	64281	58955	64068	69702
2014-10-20 19:10:40.910	64274	58932	64080	69701
2014-10-20 19:10:40.914	64304	58934	64069	69700
2014-10-20 19:10:40.920	64280	58955	64056	69664
2014-10-20 19:10:40.924	64277	58934	64067	69660
2014-10-20 19:10:40.930	64312	58937	64055	69664
2014-10-20 19:10:40.934	64294	58945	64055	69660
2014-10-20 19:10:40.940	64287	58941	64083	69690
2014-10-20 19:10:40.944	64289	58936	64087	69710
2014-10-20 19:10:40.950	64295	58933	64097	69687
2014-10-20 19:10:40.954	64299	58948	64111	69656
2014-10-20 19:10:40.960	64282	58938	64097	69639
2014-10-20 19:10:40.964	64285	58920	64090	69609
2014-10-20 19:10:40.970	64286	58948	64094	69585
2014-10-20 19:10:40.974	64276	58951	64087	69622
2014-10-20 19:10:40.980	64281	58926	64076	69675
2014-10-20 19:10:40.984	64289	58933	64068	69701
2014-10-20 19:10:40.990	64297	58936	64066	69716
2014-10-20 19:10:40.994	64293	58941	64079	69721
2014-10-20 19:10:41.000	64285	58942	64089	69728
2014-10-20 19:10:41.005	64295	58935	64093	69710
2014-10-20 19:10:41.009	64290	58953	64094	69662
2014-10-20 19:10:41.015	64283	58951	64078	69633
2014-10-20 19:10:41.019	64282	58934	64065	69613
2014-10-20 19:10:41.025	64287	58932	64077	69622
2014-10-20 19:10:41.029	64298	58929	64092	69638
2014-10-20 19:10:41.035	64285	58937	64079	69638
2014-10-20 19:10:41.039	64291	58941	64078	69641
2014-10-20 19:10:41.045	64299	58943	64089	69652
2014-10-20 19:10:41.049	64282	58945	64072	69713
2014-10-20 19:10:41.055	64280	58924	64060	69753
2014-10-20 19:10:41.059	64285	58933	64056	69755
2014-10-20 19:10:41.065	64289	58941	64058	69760
2014-10-20 19:10:41.069	64289	58929	64057	69733
2014-10-20 19:10:41.075	64289	58950	64056	69702
2014-10-20 19:10:41.079	64306	58933	64066	69677
2014-10-20 19:10:41.085	64312	58922	64060	69665
2014-10-20 19:10:41.089	64298	58940	64058	69649
2014-10-20 19:10:41.095	64290	58940	64073	69641
2014-10-20 19:10:41.099	64290	58946	64066	69646
2014-10-20 19:10:41.105	64287	58937	64075	69627
2014-10-20 19:10:41.109	64293	58929	64103	69632
2014-10-20 19:10:41.115	64287	58928	64097	69634
2014-10-20 19:10:41.119	64290	58930	64092	69629
2014-10-20 19:10:41.125	64292	58934	64081	69633
2014-10-20 19:10:41.130	64283	58920	64077	69619
2014-10-20 19:10:41.134	64296	58932	64107	69646
2014-10-20 19:10:41.140	64282	58944	64093	69691
2014-10-20 19:10:41.144	64277	58932	64076	69702
2014-10-20 19:10:41.150	64296	58932	64095	69691
2014-10-20 19:10:41.154	64288	58934	64091	69697
2014-10-20 19:10:41.160	64283	58929	64088	69727
2014-10-20 19:10:41.164	64287	58928	64080	69740
2014-10-20 19:10:41.170	64301	58935	64076	69737
2014-10-20 19:10:41.174	64296	58933	64077	69712
2014-10-20 19:10:41.180	64281	58929	64052	69694
2014-10-20 19:10:41.184	64301	58938	64048	69686
2014-10-20 19:10:41.190	64305	58941	64060	69645
2014-10-20 19:10:41.194	64297	58934	64069	69633
2014-10-20 19:10:41.200	64293	58931	64078	69649
2014-10-20 19:10:41.204	64294	58929	64064	69657
2014-10-20 19:10:41.210	64302	58928	64060	69695
2014-10-20 19:10:41.214	64277	58932	64062	69717
2014-10-20 19:10:41.220	64293	58940	64055	69672
2014-10-20 19:10:41.224	64298	58935	64045	69631
2014-10-20 19:10:41.230	64281	58928	64041	69615
2014-10-20 19:10:41.234	64299	58935	64056	69587
2014-10-20 19:10:41.240	64278	58930	64066	69599
2014-10-20 19:10:41.244	64281	58931	64065	69656
2014-10-20 19:10:41.250	64280	58927	64072	69690
2014-10-20 19:10:41.255	64276	58927	64077	69687
2014-10-20 19:10:41.259	64300	58938	64079	69697
2014-10-20 19:10:41.265	64276	58922	64083	69711
2014-10-20 19:10:41.269	64267	58928	64075	69706
2014-10-20 19:10:41.275	64295	58929	64060	69715
2014-10-20 19:10:41.279	64296	58924	64044	69721
2014-10-20 19:10:41.285	64284	58937	64057	69716
2014-10-20 19:10:41.289	64289	58923	64076	69705
2014-10-20 19:10:41.295	64286	58929	64075	69690
2014-10-20 19:10:41.299	64283	58936	64078	69680
2014-10-20 19:10:41.305	64286	58912	64062	69644
2014-10-20 19:10:41.309	64281	58922	64062	69613
2014-10-20 19:10:41.315	64298	58940	64082	69593
2014-10-20 19:10:41.319	64299	58918	64071	69586
2014-10-20 19:10:41.325	64291	58923	64073	69610
2014-10-20 19:10:41.329	64296	58951	64081	69629
2014-10-20 19:10:41.335	64284	58937	64066	69663
2014-10-20 19:10:41.339	64282	58926	64063	69699
2014-10-20 19:10:41.345	64291	58934	64078	69730
2014-10-20 19:10:41.349	64283	58933	64089	69771
2014-10-20 19:10:41.355	64284	58923	64094	69786
2014-10-20 19:10:41.359	64293	58917	64087	69767
2014-10-20 19:10:41.365	64287	58936	64088	69724
2014-10-20 19:10:41.369	64293	58939	64103	69685
2014-10-20 19:10:41.375	64294	58911	64088	69659
2014-10-20 19:10:41.380	64288	58929	64084	69647
2014-10-20 19:10:41.384	64302	58943	64110	69620
2014-10-20 19:10:41.390	64280	58915	64082	69591
2014-10-20 19:10:41.394	64278	58918	64069	69587
2014-10-20 19:10:41.400	64300	58927	64102	69575
2014-10-20 19:10:41.404	64282	58923	64091	69589
2014-10-20 19:10:41.410	64287	58929	64070	69637
2014-10-20 19:10:41.414	64299	58921	64079	69680
2014-10-20 19:10:41.420	64296	58928	64082	69697
2014-10-20 19:10:41.424	64277	58930	64065	69677
2014-10-20 19:10:41.430	64270	58920	64061	69653
2014-10-20 19:10:41.434	64295	58930	64075	69655
2014-10-20 19:10:41.440	64287	58930	64068	69673
2014-10-20 19:10:41.444	64286	58924	64052	69695
2014-10-20 19:10:41.450	64294	58926	64055	69707
2014-10-20 19:10:41.454	64279	58928	64068	69723
2014-10-20 19:10:41.460	64277	58928	64070	69738
2014-10-20 19:10:41.464	64273	58930	64047	69726
2014-10-20 19:10:41.470	64278	58929	64045	69705
2014-10-20 19:10:41.474	64288	58928	64064	69671
2014-10-20 19:10:41.480	64282	58927	64063	69642
2014-10-20 19:10:41.484	64293	58914	64069	69640
2014-10-20 19:10:41.490	64304	58919	64074	69633
2014-10-20 19:10:41.494	64281	58924	64082	69641
2014-10-20 19:10:41.500	64279	58922	64098	69645
2014-10-20 19:10:41.505	64291	58940	64092	69626
2014-10-20 19:10:41.509	64278	58925	64073	69626
2014-10-20 19:10:41.515	64273	58907	64059	69627
2014-10-20 19:10:41.519	64283	58926	64059	69640
2014-10-20 19:10:41.525	64292	58930	64050	69653
2014-10-20 19:10:41.529	64282	58921	64053	69634
2014-10-20 19:10:41.535	64268	58915	64078	69634
2014-10-20 19:10:41.539	64275	58920	64082	69655
2014-10-20 19:10:41.545	64288	58929	64089	69705
2014-10-20 19:10:41.549	64280	58914	64101	69763
2014-10-20 19:10:41.555	64265	58919	64107	69787
2014-10-20 19:10:41.559	64279	58923	64120	69787
2014-10-20 19:10:41.565	64296	58904	64121	69733
2014-10-20 19:10:41.569	64284	58916	64094	69693
2014-10-20 19:10:41.575	64269	58928	64075	69677
2014-10-20 19:10:41.579	64282	58915	64069	69641
2014-10-20 19:10:41.585	64292	58910	64051	69648
2014-10-20 19:10:41.589	64272	58918	64032	69668
2014-10-20 19:10:41.595	64286	58909	64020	69636
2014-10-20 19:10:41.599	64296	58913	64018	69604
2014-10-20 19:10:41.605	64276	58920	64021	69591
2014-10-20 19:10:41.609	64282	58906	64043	69578
2014-10-20 19:10:41.615	64285	58913	64077	69574
2014-10-20 19:10:41.619	64280	58910	64080	69583
2014-10-20 19:10:41.625	64282	58914	64073	69625
2014-10-20 19:10:41.630	64283	58925	64062	69659
2014-10-20 19:10:41.634	64284	58913	64068	69673
2014-10-20 19:10:41.640	64285	58908	64104	69715
2014-10-20 19:10:41.644	64278	58908	64113	69746
2014-10-20 19:10:41.650	64279	58919	64100	69740
2014-10-20 19:10:41.654	64285	58914	64087	69719
2014-10-20 19:10:41.660	64282	58903	64076	69732
2014-10-20 19:10:41.664	64283	58906	64077	69737
2014-10-20 19:10:41.670	64283	58909	64080	69702
2014-10-20 19:10:41.674	64285	58927	64093	69681
2014-10-20 19:10:41.680	64271	58920	64103	69645
2014-10-20 19:10:41.684	64274	58907	64104	69610
2014-10-20 19:10:41.690	64300	58923	64098	69604
2014-10-20 19:10:41.694	64279	58911	64068	69618
2014-10-20 19:10:41.700	64274	58902	64064	69632
2014-10-20 19:10:41.704	64289	58918	64086	69625
2014-10-20 19:10:41.710	64277	58911	64083	69615
2014-10-20 19:10:41.714	64286	58909	64089	69621
2014-10-20 19:10:41.720	64288	58918	64096	69653
2014-10-20 19:10:41.724	64271	58905	64075	69690
2014-10-20 19:10:41.730	64283	58909	64058	69713
2014-10-20 19:10:41.734	64279	58908	64066	69703
2014-10-20 19:10:41.740	64290	58896	64069	69690
2014-10-20 19:10:41.744	64296	58911	64059	69668
2014-10-20 19:10:41.750	64270	58915	64064	69638
2014-10-20 19:10:41.755	64289	58914	64066	69664
2014-10-20 19:10:41.759	64281	58913	64071	69671
2014-10-20 19:10:41.765	64276	58904	64098	69661
2014-10-20 19:10:41.769	64296	58905	64102	69680
2014-10-20 19:10:41.775	64281	58898	64077	69671
2014-10-20 19:10:41.779	64288	58899	64062	69656
2014-10-20 19:10:41.785	64280	58908	64074	69644
2014-10-20 19:10:41.789	64280	58904	64085	69627
2014-10-20 19:10:41.795	64291	58903	64077	69622
2014-10-20 19:10:41.799	64272	58911	64082	69642
2014-10-20 19:10:41.805	64298	58912	64089	69675
2014-10-20 19:10:41.809	64297	58905	64086	69687
2014-10-20 19:10:41.815	64277	58908	64086	69675
2014-10-20 19:10:41.819	64293	58905	64086	69672
2014-10-20 19:10:41.825	64285	58893	64096	69689
2014-10-20 19:10:41.829	64291	58905	64091	69692
2014-10-20 19:10:41.835	64293	58912	64071	69690
2014-10-20 19:10:41.839	64278	58909	64082	69681
2014-10-20 19:10:41.845	64279	58908	64100	69665
2014-10-20 19:10:41.849	64274	58913	64108	69662
2014-10-20 19:10:41.855	64281	58929	64095	69671
2014-10-20 19:10:41.859	64276	58915	64096	69709
2014-10-20 19:10:41.865	64276	58912	64112	69713
2014-10-20 19:10:41.869	64289	58920	64096	69673
2014-10-20 19:10:41.875	64282	58909	64089	69638
2014-10-20 19:10:41.880	64289	58913	64089	69606
2014-10-20 19:10:41.884	64281	58908	64077	69586
2014-10-20 19:10:41.890	64278	58909	64069	69600
2014-10-20 19:10:41.894	64281	58911	64054	69639
2014-10-20 19:10:41.900	64280	58909	64060	69634
2014-10-20 19:10:41.904	64289	58912	64087	69609
2014-10-20 19:10:41.910	64280	58902	64090	69609
2014-10-20 19:10:41.914	64291	58917	64083	69634
2014-10-20 19:10:41.920	64304	58922	64087	69661
2014-10-20 19:10:41.924	64278	58914	64088	69659
2014-10-20 19:10:41.930	64278	58918	64080	69702
2014-10-20 19:10:41.934	64292	58910	64070	69733
2014-10-20 19:10:41.940	64282	58920	64051	69735
2014-10-20 19:10:41.944	64284	58914	64057	69766
2014-10-20 19:10:41.950	64289	58907	64085	69764
2014-10-20 19:10:41.954	64286	58919	64082	69758
2014-10-20 19:10:41.960	64301	58900	64081	69738
2014-10-20 19:10:41.964	64287	58911	64091	69689
2014-10-20 19:10:41.970	64281	58921	64090	69661
2014-10-20 19:10:41.974	64295	58910	64085	69635
2014-10-20 19:10:41.980	64274	58914	64075	69631
2014-10-20 19:10:41.984	64277	58908	64076	69643
2014-10-20 19:10:41.990	64286	58906	64094	69618
2014-10-20 19:10:41.994	64290	58900	64095	69594
2014-10-20 19:10:42.000	64297	58906	64092	69591
2014-10-20 19:10:42.005	64280	58922	64106	69590
2014-10-20 19:10:42.009	64287	58913	64129	69590
2014-10-20 19:10:42.015	64296	58908	64140	69605
2014-10-20 19:10:42.019	64293	58909	64126	69674
2014-10-20 19:10:42.025	64288	58906	64131	69729
2014-10-20 19:10:42.029	64289	58912	64114	69735
2014-10-20 19:10:42.035	64295	58912	64074	69735
2014-10-20 19:10:42.039	64289	58905	64077	69725
2014-10-20 19:10:42.045	64284	58915	64077	69705
2014-10-20 19:10:42.049	64289	58916	64083	69689
2014-10-20 19:10:42.055	64293	58914	64091	69701
2014-10-20 19:10:42.059	64284	58918	64082	69708
2014-10-20 19:10:42.065	64291	58914	64085	69690
2014-10-20 19:10:42.069	64300	58918	64089	69680
2014-10-20 19:10:42.075	64289	58917	64089	69692
2014-10-20 19:10:42.079	64288	58913	64080	69704
2014-10-20 19:10:42.085	64297	58906	64097	69705
2014-10-20 19:10:42.089	64285	58911	64114	69694
2014-10-20 19:10:42.095	64275	58911	64103	69666
2014-10-20 19:10:42.099	64294	58907	64120	69646
2014-10-20 19:10:42.105	64300	58936	64117	69625
2014-10-20 19:10:42.109	64289	58926	64102	69628
2014-10-20 19:10:42.115	64284	58911	64110	69643
2014-10-20 19:10:42.119	64294	58918	64118	69661
2014-10-20 19:10:42.125	64303	58911	64109	69695
2014-10-20 19:10:42.130	64298	58916	64095	69674
2014-10-20 19:10:42.134	64297	58908	64102	69648
2014-10-20 19:10:42.140	64298	58914	64096	69642
2014-10-20 19:10:42.144	64304	58926	64107	69644
2014-10-20 19:10:42.150	64303	58904	64117	69658
2014-10-20 19:10:42.154	64299	58913	64099	69687
2014-10-20 19:10:42.160	64297	58929	64090	69737
2014-10-20 19:10:42.164	64289	58918	64086	69748
2014-10-20 19:10:42.170	64298	58906	64082	69721
2014-10-20 19:10:42.174	64300	58914	64069	69704
2014-10-20 19:10:42.180	64289	58920	64069	69690
2014-10-20 19:10:42.184	64293	58904	64088	69665
2014-10-20 19:10:42.190	64307	58906	64097	69659
2014-10-20 19:10:42.194	64311	58922	64092	69671
2014-10-20 19:10:42.200	64291	58919	64084	69669
2014-10-20 19:10:42.204	64288	58922	64101	69669
2014-10-20 19:10:42.210	64314	58921	64117	69679
2014-10-20 19:10:42.214	64310	58911	64116	69687
2014-10-20 19:10:42.220	64302	58915	64112	69683
2014-10-20 19:10:42.224	64309	58925	64118	69699
2014-10-20 19:10:42.230	64303	58930	64123	69716
2014-10-20 19:10:42.234	64301	58925	64098	69703
2014-10-20 19:10:42.240	64289	58922	64103	69690
2014-10-20 19:10:42.244	64302	58921	64124	69678
2014-10-20 19:10:42.250	64316	58914	64135	69669
2014-10-20 19:10:42.255	64291	58921	64145	69665
2014-10-20 19:10:42.259	64306	58927	64142	69688
2014-10-20 19:10:42.265	64324	58917	64133	69703
2014-10-20 19:10:42.269	64299	58915	64108	69717
2014-10-20 19:10:42.275	64306	58922	64102	69712
2014-10-20 19:10:42.279	64321	58931	64106	69654
2014-10-20 19:10:42.285	64295	58930	64097	69649
2014-10-20 19:10:42.289	64303	58918	64100	69663
2014-10-20 19:10:42.295	64316	58928	64100	69667
2014-10-20 19:10:42.299	64311	58941	64109	69692
2014-10-20 19:10:42.305	64314	58926	64112	69711
2014-10-20 19:10:42.309	64298	58926	64105	69713
2014-10-20 19:10:42.315	64305	58940	64111	69686
2014-10-20 19:10:42.319	64312	58942	64117	69692
2014-10-20 19:10:42.325	64302	58925	64123	69689
2014-10-20 19:10:42.329	64312	58921	64131	69689
2014-10-20 19:10:42.335	64315	58937	64107	69709
2014-10-20 19:10:42.339	64309	58928	64100	69719
2014-10-20 19:10:42.345	64309	58921	64133	69770
2014-10-20 19:10:42.349	64313	58931	64144	69759
2014-10-20 19:10:42.355	64312	58940	64155	69693
2014-10-20 19:10:42.359	64307	58940	64144	69682
2014-10-20 19:10:42.365	64307	58936	64110	69663
2014-10-20 19:10:42.369	64318	58934	64128	69634
2014-10-20 19:10:42.375	64320	58932	64143	69633
2014-10-20 19:10:42.380	64318	58936	64131	69616
2014-10-20 19:10:42.384	64323	58944	64137	69612
2014-10-20 19:10:42.390	64328	58940	64133	69681
2014-10-20 19:10:42.394	64326	58931	64115	69730
2014-10-20 19:10:42.400	64300	58938	64109	69715
2014-10-20 19:10:42.404	64319	58941	64108	69719
2014-10-20 19:10:42.410	64333	58938	64109	69718
2014-10-20 19:10:42.414	64307	58952	64120	69691
2014-10-20 19:10:42.420	64315	58953	64132	69695
2014-10-20 19:10:42.424	64317	58946	64137	69729
2014-10-20 19:10:42.430	64322	58940	64118	69763
2014-10-20 19:10:42.434	64323	58932	64101	69781
2014-10-20 19:10:42.440	64323	58945	64099	69781
2014-10-20 19:10:42.444	64342	58947	64102	69773
2014-10-20 19:10:42.450	64330	58924	64118	69735
2014-10-20 19:10:42.454	64318	58933	64125	69689
2014-10-20 19:10:42.460	64312	58951	64125	69660
2014-10-20 19:10:42.464	64335	58938	64129	69634
2014-10-20 19:10:42.470	64347	58931	64123	69650
2014-10-20 19:10:42.474	64317	58946	64111	69672
2014-10-20 19:10:42.480	64338	58946	64109	69665
2014-10-20 19:10:42.484	64338	58948	64131	69659
2014-10-20 19:10:42.490	64323	58956	64141	69683
2014-10-20 19:10:42.494	64339	58928	64130	69718
2014-10-20 19:10:42.500	64318	58937	64118	69715
2014-10-20 19:10:42.505	64329	58959	64117	69719
2014-10-20 19:10:42.509	64336	58947	64132	69729
2014-10-20 19:10:42.515	64322	58954	64157	69718
2014-10-20 19:10:42.519	64340	58943	64173	69736
2014-10-20 19:10:42.525	64334	58946	64152	69780
2014-10-20 19:10:42.529	64338	58957	64131	69798
2014-10-20 19:10:42.535	64339	58950	64121	69770
2014-10-20 19:10:42.539	64345	58960	64099	69739
2014-10-20 19:10:42.545	64361	58957	64091	69710
2014-10-20 19:10:42.549	64333	58949	64106	69672
2014-10-20 19:10:42.555	64343	58950	64130	69674
2014-10-20 19:10:42.559	64346	58955	64155	69678
2014-10-20 19:10:42.565	64318	58955	64140	69678
2014-10-20 19:10:42.569	64331	58942	64118	69720
2014-10-20 19:10:42.575	64348	58952	64138	69754
2014-10-20 19:10:42.579	64361	58964	64132	69748
2014-10-20 19:10:42.585	64336	58948	64123	69741
2014-10-20 19:10:42.589	64322	58951	64151	69717
2014-10-20 19:10:42.595	64351	58952	64151	69685
2014-10-20 19:10:42.599	64350	58943	64138	69699
2014-10-20 19:10:42.605	64341	58957	64150	69715
2014-10-20 19:10:42.609	64332	58959	64162	69709
2014-10-20 19:10:42.615	64341	58971	64171	69706
2014-10-20 19:10:42.619	64351	58962	64181	69722
2014-10-20 19:10:42.625	64335	58942	64176	69754
2014-10-20 19:10:42.630	64342	58974	64166	69761
2014-10-20 19:10:42.634	64356	58972	64153	69759
2014-10-20 19:10:42.640	64345	58960	64145	69767
2014-10-20 19:10:42.644	64349	58972	64145	69753
2014-10-20 19:10:42.650	64360	58965	64142	69728
2014-10-20 19:10:42.654	64332	58963	64136	69726
2014-10-20 19:10:42.660	64346	58957	64118	69699
2014-10-20 19:10:42.664	64368	58961	64116	69658
2014-10-20 19:10:42.670	64327	58977	64131	69647
2014-10-20 19:10:42.674	64319	58975	64130	69665
2014-10-20 19:10:42.680	64362	58979	64128	69722
2014-10-20 19:10:42.684	64370	58978	64126	69745
2014-10-20 19:10:42.690	64334	58957	64123	69745
2014-10-20 19:10:42.694	64338	58971	64121	69773
2014-10-20 19:10:42.700	64377	58986	64137	69774
2014-10-20 19:10:42.704	64358	58961	64165	69782
2014-10-20 19:10:42.710	64326	58968	64172	69765
2014-10-20 19:10:42.714	64359	58985	64184	69734
2014-10-20 19:10:42.720	64366	58980	64193	69743
2014-10-20 19:10:42.724	64333	58967	64187	69745
2014-10-20 19:10:42.730	64351	58961	64194	69741
2014-10-20 19:10:42.734	64363	58977	64203	69748
2014-10-20 19:10:42.740	64346	58971	64187	69759
2014-10-20 19:10:42.744	64345	58968	64157	69754
2014-10-20 19:10:42.750	64360	58979	64138	69741
2014-10-20 19:10:42.755	64360	58970	64120	69726
2014-10-20 19:10:42.759	64348	58971	64132	69698
2014-10-20 19:10:42.765	64363	58972	64142	69688
2014-10-20 19:10:42.769	64376	58971	64139	69669
2014-10-20 19:10:42.775	64347	58985	64163	69659
2014-10-20 19:10:42.779	64332	58975	64155	69696
2014-10-20 19:10:42.785	64352	58968	64136	69705
2014-10-20 19:10:42.789	64358	58985	64129	69719
2014-10-20 19:10:42.795	64352	58976	64123	69759
2014-10-20 19:10:42.799	64363	58975	64122	69778
2014-10-20 19:10:42.805	64370	58986	64118	69809
2014-10-20 19:10:42.809	64365	58980	64137	69814
2014-10-20 19:10:42.815	64365	58977	64151	69787
2014-10-20 19:10:42.819	64363	58984	64145	69775
2014-10-20 19:10:42.825	64367	58988	64140	69766
2014-10-20 19:10:42.829	64359	58975	64152	69773
2014-10-20 19:10:42.835	64369	58986	64169	69758
2014-10-20 19:10:42.839	64378	58996	64171	69742
2014-10-20 19:10:42.845	64372	58982	64194	69733
2014-10-20 19:10:42.849	64371	58982	64190	69699
2014-10-20 19:10:42.855	64366	58985	64170	69704
2014-10-20 19:10:42.859	64379	58982	64172	69715
2014-10-20 19:10:42.865	64364	58987	64148	69714
2014-10-20 19:10:42.869	64355	58991	64148	69712
2014-10-20 19:10:42.875	64367	58985	64160	69697
2014-10-20 19:10:42.880	64366	58990	64149	69697
2014-10-20 19:10:42.884	64371	59000	64145	69705
2014-10-20 19:10:42.890	64354	58992	64145	69730
2014-10-20 19:10:42.894	64364	58988	64151	69743
2014-10-20 19:10:42.900	64370	58982	64154	69747
2014-10-20 19:10:42.904	64360	58996	64159	69792
2014-10-20 19:10:42.910	64367	59001	64152	69819
2014-10-20 19:10:42.914	64362	58986	64130	69825
2014-10-20 19:10:42.920	64363	58993	64132	69830
2014-10-20 19:10:42.924	64351	58977	64154	69803
2014-10-20 19:10:42.930	64353	58976	64169	69782
2014-10-20 19:10:42.934	64369	58994	64183	69777
2014-10-20 19:10:42.940	64363	58991	64202	69744
2014-10-20 19:10:42.944	64366	58984	64179	69703
2014-10-20 19:10:42.950	64350	58988	64160	69699
2014-10-20 19:10:42.954	64364	58996	64165	69721
2014-10-20 19:10:42.960	64382	58991	64153	69716
2014-10-20 19:10:42.964	64347	58990	64171	69717
2014-10-20 19:10:42.970	64362	59000	64185	69726
2014-10-20 19:10:42.974	64374	58997	64176	69718
2014-10-20 19:10:42.980	64376	58980	64182	69736
2014-10-20 19:10:42.984	64376	58984	64187	69740
2014-10-20 19:10:42.990	64349	58997	64191	69740
2014-10-20 19:10:42.994	64362	58999	64181	69740
2014-10-20 19:10:43.000	64367	59000	64178	69716
2014-10-20 19:10:43.005	64377	58993	64186	69730
2014-10-20 19:10:43.009	64374	58987	64179	69755
2014-10-20 19:10:43.015	64356	58982	64182	69766
2014-10-20 19:10:43.019	64373	58997	64173	69776
2014-10-20 19:10:43.025	64366	59004	64167	69766
2014-10-20 19:10:43.029	64373	58989	64179	69755
2014-10-20 19:10:43.035	64377	59000	64188	69766
2014-10-20 19:10:43.039	64367	58986	64191	69777
2014-10-20 19:10:43.045	64361	58978	64163	69783
2014-10-20 19:10:43.049	64355	59003	64158	69784
2014-10-20 19:10:43.055	64377	58993	64173	69780
2014-10-20 19:10:43.059	64364	58995	64165	69756
2014-10-20 19:10:43.065	64356	58997	64157	69728
2014-10-20 19:10:43.069	64377	58973	64161	69741
2014-10-20 19:10:43.075	64372	58991	64172	69731
2014-10-20 19:10:43.079	64373	58998	64168	69727
2014-10-20 19:10:43.085	64367	58985	64170	69754
2014-10-20 19:10:43.089	64373	58998	64179	69745
2014-10-20 19:10:43.095	64381	58999	64195	69717
2014-10-20 19:10:43.099	64377	58990	64211	69702
2014-10-20 19:10:43.105	64374	58987	64201	69735
2014-10-20 19:10:43.109	64371	58992	64198	69778
2014-10-20 19:10:43.115	64383	58993	64191	69801
2014-10-20 19:10:43.119	64368	58988	64194	69809
2014-10-20 19:10:43.125	64362	58994	64201	69781
2014-10-20 19:10:43.130	64380	58996	64183	69731
2014-10-20 19:10:43.134	64372	58988	64182	69700
2014-10-20 19:10:43.140	64374	58983	64184	69727
2014-10-20 19:10:43.144	64376	58992	64170	69759
2014-10-20 19:10:43.150	64376	58997	64166	69774
2014-10-20 19:10:43.154	64372	58992	64160	69790
2014-10-20 19:10:43.160	64361	58994	64144	69776
2014-10-20 19:10:43.164	64376	58989	64147	69777
2014-10-20 19:10:43.170	64384	58986	64167	69785
2014-10-20 19:10:43.174	64376	58983	64182	69765
2014-10-20 19:10:43.180	64376	58973	64176	69750
2014-10-20 19:10:43.184	64371	58980	64160	69735
2014-10-20 19:10:43.190	64379	58986	64178	69735
2014-10-20 19:10:43.194	64384	58986	64193	69734
2014-10-20 19:10:43.200	64373	58984	64169	69741
2014-10-20 19:10:43.204	64368	58990	64160	69754
2014-10-20 19:10:43.210	64376	58990	64183	69746
2014-10-20 19:10:43.214	64379	58985	64194	69756
2014-10-20 19:10:43.220	64370	58998	64186	69767
2014-10-20 19:10:43.224	64381	58993	64185	69781
2014-10-20 19:10:43.230	64392	58993	64190	69794
2014-10-20 19:10:43.234	64367	59013	64201	69798
2014-10-20 19:10:43.240	64355	58998	64187	69803
2014-10-20 19:10:43.244	64372	58981	64179	69794
2014-10-20 19:10:43.250	64378	58997	64201	69766
2014-10-20 19:10:43.255	64377	58995	64198	69720
2014-10-20 19:10:43.259	64376	58978	64179	69695
2014-10-20 19:10:43.265	64379	58992	64165	69705
2014-10-20 19:10:43.269	64365	58996	64157	69743
2014-10-20 19:10:43.275	64364	58990	64157	69775
2014-10-20 19:10:43.279	64382	58996	64165	69783
2014-10-20 19:10:43.285	64364	58987	64173	69769
2014-10-20 19:10:43.289	64364	58984	64162	69713
2014-10-20 19:10:43.295	64382	58983	64173	69710
2014-10-20 19:10:43.299	64372	58990	64215	69729
2014-10-20 19:10:43.305	64346	58997	64221	69720
2014-10-20 19:10:43.309	64366	58978	64202	69756
2014-10-20 19:10:43.315	64400	58992	64184	69772
2014-10-20 19:10:43.319	64377	59013	64161	69778
2014-10-20 19:10:43.325	64364	58979	64153	69791
2014-10-20 19:10:43.329	64370	58978	64158	69796
2014-10-20 19:10:43.335	64388	59000	64147	69813
2014-10-20 19:10:43.339	64385	58974	64149	69814
2014-10-20 19:10:43.345	64332	58972	64163	69822
2014-10-20 19:10:43.349	64367	58991	64158	69799
2014-10-20 19:10:43.355	64430	58991	64168	69791
2014-10-20 19:10:43.359	64373	58987	64195	69821
2014-10-20 19:10:43.365	64325	58978	64203	69791
2014-10-20 19:10:43.369	64369	58989	64198	69772
2014-10-20 19:10:43.375	64403	58986	64206	69738
2014-10-20 19:10:43.380	64358	58973	64218	69677
2014-10-20 19:10:43.384	64343	58988	64208	69682
2014-10-20 19:10:43.390	64401	58990	64210	69667
2014-10-20 19:10:43.394	64382	58988	64200	69648
2014-10-20 19:10:43.400	64358	58993	64155	69679
2014-10-20 19:10:43.404	64391	58993	64143	69719
2014-10-20 19:10:43.410	64381	58988	64147	69753
2014-10-20 19:10:43.414	64359	58985	64154	69763
2014-10-20 19:10:43.420	64359	58982	64160	69787
2014-10-20 19:10:43.424	64392	58979	64159	69798
2014-10-20 19:10:43.430	64378	58986	64169	69795
2014-10-20 19:10:43.434	64352	58988	64189	69836
2014-10-20 19:10:43.440	64381	58980	64208	69828
2014-10-20 19:10:43.444	64388	58977	64195	69801
2014-10-20 19:10:43.450	64375	58990	64173	69790
2014-10-20 19:10:43.454	64370	58990	64173	69754
2014-10-20 19:10:43.460	64380	58970	64160	69748
2014-10-20 19:10:43.464	64367	58987	64149	69741
2014-10-20 19:10:43.470	64372	58989	64171	69747
2014-10-20 19:10:43.474	64393	58970	64186	69775
2014-10-20 19:10:43.480	64362	58992	64199	69766
2014-10-20 19:10:43.484	64364	58993	64209	69751
2014-10-20 19:10:43.490	64378	58979	64209	69729
2014-10-20 19:10:43.494	64363	58985	64215	69716
2014-10-20 19:10:43.500	64365	58980	64200	69711
2014-10-20 19:10:43.505	64372	58979	64174	69696
2014-10-20 19:10:43.509	64373	58982	64157	69703
2014-10-20 19:10:43.515	64367	58989	64133	69721
2014-10-20 19:10:43.519	64374	58984	64124	69728
2014-10-20 19:10:43.525	64379	58978	64123	69734
2014-10-20 19:10:43.529	64362	58993	64131	69743
2014-10-20 19:10:43.535	64363	58986	64151	69745
2014-10-20 19:10:43.539	64371	58984	64162	69759
2014-10-20 19:10:43.545	64357	58986	64179	69777
2014-10-20 19:10:43.549	64361	58980	64174	69800
2014-10-20 19:10:43.555	64371	58991	64163	69829
2014-10-20 19:10:43.559	64366	58983	64179	69820
2014-10-20 19:10:43.565	64359	58986	64193	69806
2014-10-20 19:10:43.569	64365	58989	64205	69798
2014-10-20 19:10:43.575	64381	58980	64203	69781
2014-10-20 19:10:43.579	64363	58974	64187	69746
2014-10-20 19:10:43.585	64363	58962	64154	69694
2014-10-20 19:10:43.589	64372	58978	64134	69706
2014-10-20 19:10:43.595	64370	58983	64139	69732
2014-10-20 19:10:43.599	64371	58970	64134	69720
2014-10-20 19:10:43.605	64365	58978	64163	69731
2014-10-20 19:10:43.609	64363	58975	64187	69739
2014-10-20 19:10:43.615	64362	58978	64165	69728
2014-10-20 19:10:43.619	64366	58984	64170	69717
2014-10-20 19:10:43.625	64369	58969	64168	69718
2014-10-20 19:10:43.630	64379	58969	64170	69737
2014-10-20 19:10:43.634	64377	58967	64195	69748
2014-10-20 19:10:43.640	64360	58980	64204	69760
2014-10-20 19:10:43.644	64357	58985	64201	69761
2014-10-20 19:10:43.650	64359	58967	64168	69748
2014-10-20 19:10:43.654	64354	58982	64152	69759
2014-10-20 19:10:43.660	64353	58983	64146	69758
2014-10-20 19:10:43.664	64372	58970	64112	69759
2014-10-20 19:10:43.670	64371	58972	64108	69789
2014-10-20 19:10:43.674	64360	58987	64133	69796
2014-10-20 19:10:43.680	64352	58983	64152	69777
2014-10-20 19:10:43.684	64355	58957	64156	69768
2014-10-20 19:10:43.690	64359	58989	64170	69734
2014-10-20 19:10:43.694	64348	58995	64190	69716
2014-10-20 19:10:43.700	64370	58966	64191	69732
2014-10-20 19:10:43.704	64366	58986	64183	69732
2014-10-20 19:10:43.710	64349	58973	64186	69765
2014-10-20 19:10:43.714	64362	58954	64215	69778
2014-10-20 19:10:43.720	64360	58982	64210	69760
2014-10-20 19:10:43.724	64346	58979	64174	69763
2014-10-20 19:10:43.730	64347	58964	64157	69751
2014-10-20 19:10:43.734	64365	58975	64153	69751
2014-10-20 19:10:43.740	64355	58978	64167	69734
2014-10-20 19:10:43.744	64350	58973	64173	69704
2014-10-20 19:10:43.750	64360	58970	64175	69711
2014-10-20 19:10:43.755	64368	58978	64188	69725
2014-10-20 19:10:43.759	64360	58983	64191	69728
2014-10-20 19:10:43.765	64350	58968	64184	69713
2014-10-20 19:10:43.769	64360	58970	64156	69714
2014-10-20 19:10:43.775	64344	58988	64151	69707
2014-10-20 19:10:43.779	64347	58966	64166	69708
2014-10-20 19:10:43.785	64361	58961	64153	69749
2014-10-20 19:10:43.789	64349	58986	64146	69770
2014-10-20 19:10:43.795	64345	58982	64127	69777
2014-10-20 19:10:43.799	64357	58976	64117	69766
2014-10-20 19:10:43.805	64359	58977	64150	69738
2014-10-20 19:10:43.809	64341	58974	64155	69711
2014-10-20 19:10:43.815	64342	58963	64141	69725
2014-10-20 19:10:43.819	64347	58962	64156	69778
2014-10-20 19:10:43.825	64349	58974	64151	69789
2014-10-20 19:10:43.829	64349	58962	64130	69805
2014-10-20 19:10:43.835	64352	58954	64155	69797
2014-10-20 19:10:43.839	64360	58974	64187	69745
2014-10-20 19:10:43.845	64345	58971	64178	69719
2014-10-20 19:10:43.849	64341	58955	64151	69676
2014-10-20 19:10:43.855	64355	58969	64145	69635
2014-10-20 19:10:43.859	64352	58977	64142	69647
2014-10-20 19:10:43.865	64356	58971	64137	69675
2014-10-20 19:10:43.869	64355	58967	64161	69695
2014-10-20 19:10:43.875	64350	58967	64176	69730
2014-10-20 19:10:43.880	64352	58970	64179	69739
2014-10-20 19:10:43.884	64343	58961	64162	69714
2014-10-20 19:10:43.890	64349	58959	64146	69707
2014-10-20 19:10:43.894	64356	58967	64177	69700
2014-10-20 19:10:43.900	64339	58972	64179	69726
2014-10-20 19:10:43.904	64348	58966	64139	69761
2014-10-20 19:10:43.910	64354	58962	64118	69780
2014-10-20 19:10:43.914	64342	58968	64130	69803
2014-10-20 19:10:43.920	64345	58965	64140	69779
2014-10-20 19:10:43.924	64335	58953	64139	69791
2014-10-20 19:10:43.930	64344	58956	64144	69808
2014-10-20 19:10:43.934	64359	58970	64114	69771
2014-10-20 19:10:43.940	64340	58963	64094	69762
2014-10-20 19:10:43.944	64338	58954	64113	69737
2014-10-20 19:10:43.950	64351	58954	64129	69713
2014-10-20 19:10:43.954	64342	58956	64143	69713
2014-10-20 19:10:43.960	64330	58959	64151	69707
2014-10-20 19:10:43.964	64333	58951	64160	69697
2014-10-20 19:10:43.970	64340	58956	64168	69667
2014-10-20 19:10:43.974	64352	58963	64156	69659
2014-10-20 19:10:43.980	64352	58951	64153	69654
2014-10-20 19:10:43.984	64334	58950	64150	69665
2014-10-20 19:10:43.990	64338	58955	64146	69720
2014-10-20 19:10:43.994	64347	58954	64166	69730
2014-10-20 19:10:44.000	64346	58953	64182	69745
2014-10-20 19:10:44.005	64344	58962	64192	69783
2014-10-20 19:10:44.009	64332	58957	64188	69765
2014-10-20 19:10:44.015	64336	58950	64164	69731
2014-10-20 19:10:44.019	64341	58952	64155	69699
2014-10-20 19:10:44.025	64339	58948	64148	69685
2014-10-20 19:10:44.029	64349	58952	64138	69699
2014-10-20 19:10:44.035	64340	58951	64125	69705
2014-10-20 19:10:44.039	64331	58950	64114	69735
2014-10-20 19:10:44.045	64339	58953	64117	69761
2014-10-20 19:10:44.049	64334	58951	64141	69761
2014-10-20 19:10:44.055	64324	58956	64158	69773
2014-10-20 19:10:44.059	64338	58960	64138	69763
2014-10-20 19:10:44.065	64335	58957	64123	69765
2014-10-20 19:10:44.069	64331	58956	64135	69774
2014-10-20 19:10:44.075	64351	58949	64142	69753
2014-10-20 19:10:44.079	64330	58956	64132	69739
2014-10-20 19:10:44.085	64332	58961	64125	69715
2014-10-20 19:10:44.089	64339	58959	64142	69677
2014-10-20 19:10:44.095	64325	58952	64151	69669
2014-10-20 19:10:44.099	64334	58940	64142	69665
2014-10-20 19:10:44.105	64325	58943	64137	69638
2014-10-20 19:10:44.109	64332	58937	64140	69642
2014-10-20 19:10:44.115	64341	58947	64149	69684
2014-10-20 19:10:44.119	64338	58957	64153	69692
2014-10-20 19:10:44.125	64339	58947	64160	69680
2014-10-20 19:10:44.130	64324	58949	64158	69680
2014-10-20 19:10:44.134	64331	58935	64146	69690
2014-10-20 19:10:44.140	64324	58933	64145	69734
2014-10-20 19:10:44.144	64316	58943	64142	69773
2014-10-20 19:10:44.150	64330	58939	64128	69788
2014-10-20 19:10:44.154	64317	58949	64115	69796
2014-10-20 19:10:44.160	64318	58947	64112	69787
2014-10-20 19:10:44.164	64332	58946	64127	69765
2014-10-20 19:10:44.170	64329	58947	64145	69743
2014-10-20 19:10:44.174	64326	58938	64148	69736
2014-10-20 19:10:44.180	64318	58938	64146	69719
2014-10-20 19:10:44.184	64328	58945	64141	69723
2014-10-20 19:10:44.190	64330	58951	64131	69738
2014-10-20 19:10:44.194	64319	58932	64130	69736
2014-10-20 19:10:44.200	64323	58920	64132	69717
2014-10-20 19:10:44.204	64330	58938	64136	69666
2014-10-20 19:10:44.210	64335	58941	64141	69642
2014-10-20 19:10:44.214	64328	58933	64135	69612
2014-10-20 19:10:44.220	64325	58935	64125	69596
2014-10-20 19:10:44.224	64328	58949	64152	69639
2014-10-20 19:10:44.230	64327	58941	64169	69677
2014-10-20 19:10:44.234	64334	58934	64169	69727
2014-10-20 19:10:44.240	64321	58943	64190	69736
2014-10-20 19:10:44.244	64320	58928	64177	69726
2014-10-20 19:10:44.250	64329	58928	64167	69737
2014-10-20 19:10:44.255	64321	58938	64161	69719
2014-10-20 19:10:44.259	64319	58943	64142	69730
2014-10-20 19:10:44.265	64316	58934	64145	69743
2014-10-20 19:10:44.269	64328	58918	64111	69757
2014-10-20 19:10:44.275	64319	58931	64095	69799
2014-10-20 19:10:44.279	64306	58933	64117	69814
2014-10-20 19:10:44.285	64331	58931	64101	69789
2014-10-20 19:10:44.289	64322	58938	64094	69739
2014-10-20 19:10:44.295	64324	58930	64094	69708
2014-10-20 19:10:44.299	64334	58934	64088	69673
2014-10-20 19:10:44.305	64319	58939	64105	69617
2014-10-20 19:10:44.309	64322	58933	64115	69621
2014-10-20 19:10:44.315	64312	58948	64116	69663
2014-10-20 19:10:44.319	64319	58951	64119	69656
2014-10-20 19:10:44.325	64321	58927	64118	69670
2014-10-20 19:10:44.329	64309	58930	64130	69708
2014-10-20 19:10:44.335	64330	58936	64142	69679
2014-10-20 19:10:44.339	64324	58924	64131	69642
2014-10-20 19:10:44.345	64319	58919	64130	69640
2014-10-20 19:10:44.349	64312	58928	64136	69676
2014-10-20 19:10:44.355	64312	58942	64128	69737
2014-10-20 19:10:44.359	64328	58943	64135	69769
2014-10-20 19:10:44.365	64320	58940	64143	69772
2014-10-20 19:10:44.369	64304	58933	64136	69768
2014-10-20 19:10:44.375	64300	58930	64135	69774
2014-10-20 19:10:44.380	64325	58942	64125	69766
2014-10-20 19:10:44.384	64315	58937	64133	69730
2014-10-20 19:10:44.390	64305	58928	64146	69741
2014-10-20 19:10:44.394	64316	58926	64129	69756
2014-10-20 19:10:44.400	64313	58931	64118	69708
2014-10-20 19:10:44.404	64323	58938	64115	69670
2014-10-20 19:10:44.410	64305	58936	64114	69674
2014-10-20 19:10:44.414	64301	58934	64119	69654
2014-10-20 19:10:44.420	64304	58920	64129	69642
2014-10-20 19:10:44.424	64315	58934	64112	69654
2014-10-20 19:10:44.430	64322	58948	64097	69636
2014-10-20 19:10:44.434	64297	58919	64121	69652
2014-10-20 19:10:44.440	64323	58923	64118	69663
2014-10-20 19:10:44.444	64327	58945	64096	69661
2014-10-20 19:10:44.450	64295	58932	64110	69699
2014-10-20 19:10:44.454	64307	58916	64114	69709
2014-10-20 19:10:44.460	64323	58935	64082	69735
2014-10-20 19:10:44.464	64322	58948	64073	69742
2014-10-20 19:10:44.470	64303	58934	64086	69729
2014-10-20 19:10:44.474	64303	58922	64105	69768
2014-10-20 19:10:44.480	64325	58922	64129	69769
2014-10-20 19:10:44.484	64313	58927	64112	69749
2014-10-20 19:10:44.490	64292	58931	64115	69750
2014-10-20 19:10:44.494	64299	58928	64128	69732
2014-10-20 19:10:44.500	64308	58927	64102	69703
2014-10-20 19:10:44.505	64311	58926	64109	69667
2014-10-20 19:10:44.509	64303	58919	64140	69654
2014-10-20 19:10:44.515	64308	58934	64150	69658
2014-10-20 19:10:44.519	64313	58926	64139	69642
2014-10-20 19:10:44.525	64296	58915	64125	69652
2014-10-20 19:10:44.529	64308	58930	64112	69662
2014-10-20 19:10:44.535	64312	58923	64097	69663
2014-10-20 19:10:44.539	64306	58933	64109	69671
2014-10-20 19:10:44.545	64316	58928	64137	69655
2014-10-20 19:10:44.549	64304	58914	64130	69662
2014-10-20 19:10:44.555	64307	58936	64113	69695
2014-10-20 19:10:44.559	64306	58924	64127	69728
2014-10-20 19:10:44.565	64306	58916	64122	69739
2014-10-20 19:10:44.569	64314	58926	64115	69744
2014-10-20 19:10:44.575	64303	58912	64117	69769
2014-10-20 19:10:44.579	64313	58915	64089	69779
2014-10-20 19:10:44.585	64311	58929	64082	69777
2014-10-20 19:10:44.589	64297	58933	64099	69730
2014-10-20 19:10:44.595	64305	58933	64115	69671
2014-10-20 19:10:44.599	64315	58926	64129	69660
2014-10-20 19:10:44.605	64317	58925	64120	69648
2014-10-20 19:10:44.609	64303	58922	64100	69642
2014-10-20 19:10:44.615	64303	58916	64106	69658
2014-10-20 19:10:44.619	64302	58922	64116	69678
2014-10-20 19:10:44.625	64303	58922	64114	69679
2014-10-20 19:10:44.630	64307	58916	64109	69661
2014-10-20 19:10:44.634	64291	58916	64094	69664
2014-10-20 19:10:44.640	64300	58921	64098	69678
2014-10-20 19:10:44.644	64308	58925	64118	69703
2014-10-20 19:10:44.650	64307	58928	64136	69732
2014-10-20 19:10:44.654	64300	58915	64146	69736
2014-10-20 19:10:44.660	64287	58912	64108	69705
2014-10-20 19:10:44.664	64310	58925	64084	69687
2014-10-20 19:10:44.670	64313	58918	64099	69685
2014-10-20 19:10:44.674	64297	58915	64093	69664
2014-10-20 19:10:44.680	64305	58925	64094	69664
2014-10-20 19:10:44.684	64306	58916	64103	69671
2014-10-20 19:10:44.690	64294	58911	64095	69681
2014-10-20 19:10:44.694	64294	58930	64117	69708
2014-10-20 19:10:44.700	64312	58926	64132	69729
2014-10-20 19:10:44.704	64312	58921	64119	69749
2014-10-20 19:10:44.710	64290	58925	64100	69712
2014-10-20 19:10:44.714	64301	58914	64093	69670
2014-10-20 19:10:44.720	64330	58910	64124	69669
2014-10-20 19:10:44.724	64307	58907	64116	69648
2014-10-20 19:10:44.730	64294	58913	64097	69674
2014-10-20 19:10:44.734	64307	58917	64104	69729
2014-10-20 19:10:44.740	64304	58914	64095	69738
2014-10-20 19:10:44.744	64308	58929	64098	69723
2014-10-20 19:10:44.750	64294	58922	64094	69692
2014-10-20 19:10:44.755	64295	58913	64119	69690
2014-10-20 19:10:44.759	64308	58925	64146	69685
2014-10-20 19:10:44.765	64292	58917	64126	69659
2014-10-20 19:10:44.769	64290	58908	64128	69677
2014-10-20 19:10:44.775	64296	58903	64118	69704
2014-10-20 19:10:44.779	64294	58916	64094	69703
2014-10-20 19:10:44.785	64294	58927	64081	69672
2014-10-20 19:10:44.789	64299	58910	64067	69641
2014-10-20 19:10:44.795	64294	58925	64066	69648
2014-10-20 19:10:44.799	64296	58927	64070	69668
2014-10-20 19:10:44.805	64300	58912	64069	69687
2014-10-20 19:10:44.809	64286	58926	64074	69698
2014-10-20 19:10:44.815	64302	58913	64105	69708
2014-10-20 19:10:44.819	64302	58913	64097	69732
2014-10-20 19:10:44.825	64280	58914	64070	69742
2014-10-20 19:10:44.829	64289	58905	64093	69714
2014-10-20 19:10:44.835	64291	58930	64109	69687
2014-10-20 19:10:44.839	64299	58919	64109	69668
2014-10-20 19:10:44.845	64300	58906	64110	69607
2014-10-20 19:10:44.849	64287	58924	64118	69617
2014-10-20 19:10:44.855	64299	58919	64121	69670
2014-10-20 19:10:44.859	64293	58911	64103	69671
2014-10-20 19:10:44.865	64288	58914	64099	69714
2014-10-20 19:10:44.869	64300	58906	64111	69732
2014-10-20 19:10:44.875	64293	58905	64116	69718
2014-10-20 19:10:44.880	64296	58911	64115	69705
2014-10-20 19:10:44.884	64301	58911	64098	69659
2014-10-20 19:10:44.890	64292	58912	64054	69636
2014-10-20 19:10:44.894	64289	58915	64050	69628
2014-10-20 19:10:44.900	64283	58923	64076	69664
2014-10-20 19:10:44.904	64287	58914	64063	69726
2014-10-20 19:10:44.910	64287	58903	64062	69741
2014-10-20 19:10:44.914	64282	58914	64068	69730
2014-10-20 19:10:44.920	64293	58902	64064	69702
2014-10-20 19:10:44.924	64288	58899	64060	69682
2014-10-20 19:10:44.930	64288	58910	64056	69647
2014-10-20 19:10:44.934	64292	58904	64088	69623
2014-10-20 19:10:44.940	64290	58905	64100	69647
2014-10-20 19:10:44.944	64302	58898	64085	69687
2014-10-20 19:10:44.950	64297	58910	64079	69722
2014-10-20 19:10:44.954	64290	58911	64080	69727
2014-10-20 19:10:44.960	64288	58895	64102	69727
2014-10-20 19:10:44.964	64292	58913	64097	69707
2014-10-20 19:10:44.970	64293	58912	64077	69662
2014-10-20 19:10:44.974	64290	58900	64083	69625
2014-10-20 19:10:44.980	64299	58904	64096	69620
2014-10-20 19:10:44.984	64291	58913	64097	69679
2014-10-20 19:10:44.990	64281	58905	64080	69719
2014-10-20 19:10:44.994	64288	58902	64083	69763
2014-10-20 19:10:45.000	64285	58920	64090	69790
2014-10-20 19:10:45.005	64281	58904	64080	69728
2014-10-20 19:10:45.009	64281	58907	64081	69674
2014-10-20 19:10:45.015	64271	58908	64074	69627
2014-10-20 19:10:45.019	64289	58888	64080	69621
2014-10-20 19:10:45.025	64286	58914	64092	69647
2014-10-20 19:10:45.029	64264	58906	64086	69653
2014-10-20 19:10:45.035	64280	58887	64110	69681
2014-10-20 19:10:45.039	64285	58912	64109	69650
2014-10-20 19:10:45.045	64283	58911	64087	69615
2014-10-20 19:10:45.049	64278	58908	64104	69647
2014-10-20 19:10:45.055	64275	58908	64084	69636
2014-10-20 19:10:45.059	64283	58898	64070	69629
2014-10-20 19:10:45.065	64293	58905	64061	69643
2014-10-20 19:10:45.069	64296	58904	64039	69631
2014-10-20 19:10:45.075	64261	58901	64074	69672
2014-10-20 19:10:45.079	64290	58900	64093	69709
2014-10-20 19:10:45.085	64316	58896	64076	69703
2014-10-20 19:10:45.089	64256	58901	64073	69727
2014-10-20 19:10:45.095	64269	58893	64094	69760
2014-10-20 19:10:45.099	64305	58892	64120	69775
2014-10-20 19:10:45.105	64295	58905	64120	69743
2014-10-20 19:10:45.109	64270	58895	64113	69709
2014-10-20 19:10:45.115	64258	58891	64116	69690
2014-10-20 19:10:45.119	64294	58905	64107	69650
2014-10-20 19:10:45.125	64299	58903	64080	69634
2014-10-20 19:10:45.130	64263	58891	64080	69614
2014-10-20 19:10:45.134	64278	58892	64080	69574
2014-10-20 19:10:45.140	64300	58898	64062	69553
2014-10-20 19:10:45.144	64277	58886	64067	69586
2014-10-20 19:10:45.150	64273	58877	64078	69647
2014-10-20 19:10:45.154	64300	58896	64092	69672
2014-10-20 19:10:45.160	64292	58886	64088	69688
2014-10-20 19:10:45.164	64268	58881	64080	69701
2014-10-20 19:10:45.170	64281	58900	64069	69707
2014-10-20 19:10:45.174	64282	58881	64046	69695
2014-10-20 19:10:45.180	64271	58884	64051	69694
2014-10-20 19:10:45.184	64276	58902	64058	69734
2014-10-20 19:10:45.190	64286	58893	64078	69754
2014-10-20 19:10:45.194	64288	58888	64074	69749
2014-10-20 19:10:45.200	64271	58890	64044	69703
2014-10-20 19:10:45.204	64279	58904	64066	69673
2014-10-20 19:10:45.210	64299	58893	64083	69655
2014-10-20 19:10:45.214	64292	58884	64095	69612
2014-10-20 19:10:45.220	64285	58896	64094	69627
2014-10-20 19:10:45.224	64284	58885	64080	69646
2014-10-20 19:10:45.230	64285	58894	64088	69657
2014-10-20 19:10:45.234	64281	58892	64075	69678
2014-10-20 19:10:45.240	64275	58889	64070	69663
2014-10-20 19:10:45.244	64264	58901	64069	69632
2014-10-20 19:10:45.250	64277	58895	64058	69599
2014-10-20 19:10:45.255	64287	58885	64072	69612
2014-10-20 19:10:45.259	64275	58881	64081	69636
2014-10-20 19:10:45.265	64277	58899	64089	69634
2014-10-20 19:10:45.269	64273	58893	64103	69655
2014-10-20 19:10:45.275	64281	58870	64112	69677
2014-10-20 19:10:45.279	64275	58888	64108	69696
2014-10-20 19:10:45.285	64262	58898	64107	69715
2014-10-20 19:10:45.289	64269	58893	64116	69704
2014-10-20 19:10:45.295	64276	58886	64096	69691
2014-10-20 19:10:45.299	64279	58886	64067	69691
2014-10-20 19:10:45.305	64256	58884	64051	69688
2014-10-20 19:10:45.309	64270	58874	64049	69690
2014-10-20 19:10:45.315	64291	58887	64055	69688
2014-10-20 19:10:45.319	64275	58891	64033	69654
2014-10-20 19:10:45.325	64260	58888	64022	69629
2014-10-20 19:10:45.329	64251	58895	64034	69642
2014-10-20 19:10:45.335	64275	58890	64024	69644
2014-10-20 19:10:45.339	64269	58885	64039	69615
2014-10-20 19:10:45.345	64262	58879	64063	69598
2014-10-20 19:10:45.349	64278	58881	64048	69622
2014-10-20 19:10:45.355	64273	58882	64052	69642
2014-10-20 19:10:45.359	64275	58877	64071	69638
2014-10-20 19:10:45.365	64256	58886	64079	69649
2014-10-20 19:10:45.369	64274	58884	64094	69668
2014-10-20 19:10:45.375	64287	58883	64096	69695
2014-10-20 19:10:45.380	64258	58885	64092	69699
2014-10-20 19:10:45.384	64269	58876	64083	69704
2014-10-20 19:10:45.390	64271	58879	64070	69724
2014-10-20 19:10:45.394	64276	58884	64080	69722
2014-10-20 19:10:45.400	64267	58877	64080	69718
2014-10-20 19:10:45.404	64268	58882	64075	69693
2014-10-20 19:10:45.410	64296	58886	64070	69630
2014-10-20 19:10:45.414	64246	58872	64065	69575
2014-10-20 19:10:45.420	64251	58868	64062	69546
2014-10-20 19:10:45.424	64302	58873	64036	69546
2014-10-20 19:10:45.430	64273	58879	64041	69573
2014-10-20 19:10:45.434	64247	58877	64061	69604
2014-10-20 19:10:45.440	64262	58873	64059	69638
2014-10-20 19:10:45.444	64276	58883	64057	69670
2014-10-20 19:10:45.450	64257	58869	64068	69688
2014-10-20 19:10:45.454	64247	58860	64094	69714
2014-10-20 19:10:45.460	64277	58880	64104	69730
2014-10-20 19:10:45.464	64289	58880	64108	69746
2014-10-20 19:10:45.470	64255	58865	64112	69752
2014-10-20 19:10:45.474	64254	58873	64099	69709
2014-10-20 19:10:45.480	64276	58878	64072	69699
2014-10-20 19:10:45.484	64250	58863	64057	69704
2014-10-20 19:10:45.490	64261	58864	64067	69671
2014-10-20 19:10:45.494	64284	58875	64059	69618
2014-10-20 19:10:45.500	64262	58873	64056	69554
2014-10-20 19:10:45.505	64258	58869	64080	69540
2014-10-20 19:10:45.509	64264	58881	64088	69542
2014-10-20 19:10:45.515	64264	58879	64080	69568
2014-10-20 19:10:45.519	64251	58861	64065	69622
2014-10-20 19:10:45.525	64241	58870	64057	69629
2014-10-20 19:10:45.529	64269	58872	64072	69658
2014-10-20 19:10:45.535	64270	58860	64062	69693
2014-10-20 19:10:45.539	64246	58874	64045	69682
2014-10-20 19:10:45.545	64265	58876	64052	69679
2014-10-20 19:10:45.549	64263	58854	64031	69683
2014-10-20 19:10:45.555	64253	58873	64031	69690
2014-10-20 19:10:45.559	64257	58888	64049	69681
2014-10-20 19:10:45.565	64257	58864	64036	69657
2014-10-20 19:10:45.569	64258	58863	64048	69654
2014-10-20 19:10:45.575	64236	58860	64056	69641
2014-10-20 19:10:45.579	64254	58863	64024	69622
2014-10-20 19:10:45.585	64260	58870	64021	69622
2014-10-20 19:10:45.589	64240	58861	64024	69640
2014-10-20 19:10:45.595	64250	58874	64025	69634
2014-10-20 19:10:45.599	64246	58865	64058	69609
2014-10-20 19:10:45.605	64252	58865	64053	69617
2014-10-20 19:10:45.609	64249	58882	64050	69641
2014-10-20 19:10:45.615	64234	58862	64085	69661
2014-10-20 19:10:45.619	64248	58863	64093	69676
2014-10-20 19:10:45.625	64246	58869	64081	69689
2014-10-20 19:10:45.630	64244	58866	64059	69673
2014-10-20 19:10:45.634	64250	58873	64073	69620
2014-10-20 19:10:45.640	64252	58867	64077	69601
2014-10-20 19:10:45.644	64254	58872	64043	69609
2014-10-20 19:10:45.650	64242	58865	64037	69622
2014-10-20 19:10:45.654	64247	58843	64026	69619
2014-10-20 19:10:45.660	64258	58863	64034	69595
2014-10-20 19:10:45.664	64237	58868	64037	69580
2014-10-20 19:10:45.670	64235	58848	64017	69541
2014-10-20 19:10:45.674	64258	58849	64022	69553
2014-10-20 19:10:45.680	64253	58859	64017	69622
2014-10-20 19:10:45.684	64228	58863	64013	69645
2014-10-20 19:10:45.690	64234	58854	64011	69690
2014-10-20 19:10:45.694	64249	58857	64018	69719
2014-10-20 19:10:45.700	64240	58859	64047	69721
2014-10-20 19:10:45.704	64237	58855	64059	69732
2014-10-20 19:10:45.710	64242	58853	64061	69718
2014-10-20 19:10:45.714	64235	58844	64028	69710
2014-10-20 19:10:45.720	64229	58861	64013	69670
2014-10-20 19:10:45.724	64240	58859	64053	69634
2014-10-20 19:10:45.730	64246	58848	64061	69596
2014-10-20 19:10:45.734	64240	58863	64049	69567
2014-10-20 19:10:45.740	64241	58853	64037	69599
2014-10-20 19:10:45.744	64247	58845	64046	69587
2014-10-20 19:10:45.750	64237	58850	64088	69566
2014-10-20 19:10:45.755	64226	58849	64101	69559
2014-10-20 19:10:45.759	64231	58855	64071	69576
2014-10-20 19:10:45.765	64237	58854	64043	69624
2014-10-20 19:10:45.769	64233	58855	64043	69620
2014-10-20 19:10:45.775	64215	58849	64040	69628
2014-10-20 19:10:45.779	64240	58835	64044	69639
2014-10-20 19:10:45.785	64249	58852	64062	69627
2014-10-20 19:10:45.789	64236	58859	64059	69630
2014-10-20 19:10:45.795	64247	58843	64017	69617
2014-10-20 19:10:45.799	64229	58844	63995	69608
2014-10-20 19:10:45.805	64244	58848	64037	69613
2014-10-20 19:10:45.809	64245	58853	64048	69634
2014-10-20 19:10:45.815	64206	58845	64027	69657
2014-10-20 19:10:45.819	64222	58836	63997	69649
2014-10-20 19:10:45.825	64234	58845	63980	69657
2014-10-20 19:10:45.829	64241	58841	64026	69682
2014-10-20 19:10:45.835	64220	58836	64034	69673
2014-10-20 19:10:45.839	64214	58838	64017	69648
2014-10-20 19:10:45.845	64252	58840	64024	69639
2014-10-20 19:10:45.849	64222	58843	64025	69636
2014-10-20 19:10:45.855	64210	58833	64021	69624
2014-10-20 19:10:45.859	64240	58837	64029	69629
2014-10-20 19:10:45.865	64235	58850	64048	69620
2014-10-20 19:10:45.869	64224	58832	64056	69592
2014-10-20 19:10:45.875	64213	58823	64071	69591
2014-10-20 19:10:45.880	64226	58833	64079	69555
2014-10-20 19:10:45.884	64227	58823	64040	69544
2014-10-20 19:10:45.890	64213	58824	64033	69550
2014-10-20 19:10:45.894	64227	58832	64061	69536
2014-10-20 19:10:45.900	64225	58831	64069	69555
2014-10-20 19:10:45.904	64216	58838	64063	69554
2014-10-20 19:10:45.910	64215	58837	64059	69574
2014-10-20 19:10:45.914	64221	58831	64065	69610
2014-10-20 19:10:45.920	64219	58824	64055	69646
2014-10-20 19:10:45.924	64215	58818	64029	69692
2014-10-20 19:10:45.930	64228	58833	64014	69703
2014-10-20 19:10:45.934	64220	58840	64017	69716
2014-10-20 19:10:45.940	64210	58816	64014	69679
2014-10-20 19:10:45.944	64215	58819	64007	69622
2014-10-20 19:10:45.950	64230	58834	64000	69624
2014-10-20 19:10:45.954	64224	58828	63999	69605
2014-10-20 19:10:45.960	64203	58828	64018	69590
2014-10-20 19:10:45.964	64215	58824	64028	69614
2014-10-20 19:10:45.970	64216	58822	64024	69615
2014-10-20 19:10:45.974	64205	58826	64043	69600
2014-10-20 19:10:45.980	64211	58824	64053	69589
2014-10-20 19:10:45.984	64207	58817	64051	69558
2014-10-20 19:10:45.990	64218	58823	64074	69521
2014-10-20 19:10:45.994	64214	58832	64072	69521
2014-10-20 19:10:46.000	64195	58810	64049	69549
2014-10-20 19:10:46.005	64211	58818	64042	69572
2014-10-20 19:10:46.009	64227	58843	64025	69622
2014-10-20 19:10:46.015	64219	58823	64004	69670
2014-10-20 19:10:46.019	64196	58814	63993	69655
2014-10-20 19:10:46.025	64208	58817	63996	69636
2014-10-20 19:10:46.029	64232	58819	64012	69630
2014-10-20 19:10:46.035	64200	58810	64016	69615
2014-10-20 19:10:46.039	64186	58809	64013	69606
2014-10-20 19:10:46.045	64214	58818	64007	69584
2014-10-20 19:10:46.049	64208	58801	63998	69570
2014-10-20 19:10:46.055	64193	58803	63994	69581
2014-10-20 19:10:46.059	64192	58812	63990	69574
2014-10-20 19:10:46.065	64203	58813	63989	69553
2014-10-20 19:10:46.069	64204	58818	63992	69545
2014-10-20 19:10:46.075	64193	58811	64007	69541
2014-10-20 19:10:46.079	64206	58806	64017	69546
2014-10-20 19:10:46.085	64211	58810	64017	69558
2014-10-20 19:10:46.089	64201	58829	64010	69573
2014-10-20 19:10:46.095	64209	58831	63993	69611
2014-10-20 19:10:46.099	64213	58814	64005	69635
2014-10-20 19:10:46.105	64203	58814	64001	69658
2014-10-20 19:10:46.109	64202	58814	63976	69678
2014-10-20 19:10:46.115	64208	58812	63991	69659
2014-10-20 19:10:46.119	64197	58811	64002	69633
2014-10-20 19:10:46.125	64193	58811	64007	69600
2014-10-20 19:10:46.130	64196	58813	64032	69564
2014-10-20 19:10:46.134	64201	58809	64026	69542
2014-10-20 19:10:46.140	64198	58812	64009	69536
2014-10-20 19:10:46.144	64189	58812	64018	69542
2014-10-20 19:10:46.150	64199	58802	64025	69538
2014-10-20 19:10:46.154	64189	58794	64031	69536
2014-10-20 19:10:46.160	64193	58810	64032	69528
2014-10-20 19:10:46.164	64209	58810	64010	69505
2014-10-20 19:10:46.170	64202	58800	64003	69516
2014-10-20 19:10:46.174	64200	58807	64005	69561
2014-10-20 19:10:46.180	64189	58799	63971	69602
2014-10-20 19:10:46.184	64207	58806	63950	69628
2014-10-20 19:10:46.190	64214	58808	63966	69635
2014-10-20 19:10:46.194	64182	58805	63972	69659
2014-10-20 19:10:46.200	64187	58815	63959	69673
2014-10-20 19:10:46.204	64190	58805	63975	69643
2014-10-20 19:10:46.210	64194	58816	64015	69645
2014-10-20 19:10:46.214	64195	58831	64025	69626
2014-10-20 19:10:46.220	64189	58814	64039	69595
2014-10-20 19:10:46.224	64207	58811	64055	69581
2014-10-20 19:10:46.230	64204	58813	64048	69533
2014-10-20 19:10:46.234	64193	58801	64041	69518
2014-10-20 19:10:46.240	64183	58793	64022	69530
2014-10-20 19:10:46.244	64179	58788	64004	69531
2014-10-20 19:10:46.250	64190	58796	63997	69520
2014-10-20 19:10:46.255	64199	58803	63987	69497
2014-10-20 19:10:46.259	64190	58800	63988	69523
2014-10-20 19:10:46.265	64179	58809	63990	69558
2014-10-20 19:10:46.269	64194	58810	63987	69571
2014-10-20 19:10:46.275	64188	58799	63989	69574
2014-10-20 19:10:46.279	64185	58784	63996	69564
2014-10-20 19:10:46.285	64193	58792	64006	69573
2014-10-20 19:10:46.289	64176	58803	64004	69583
2014-10-20 19:10:46.295	64174	58796	63985	69596
2014-10-20 19:10:46.299	64176	58794	63975	69620
2014-10-20 19:10:46.305	64183	58799	63997	69650
2014-10-20 19:10:46.309	64188	58802	64001	69667
2014-10-20 19:10:46.315	64178	58802	63982	69641
2014-10-20 19:10:46.319	64192	58804	63990	69610
2014-10-20 19:10:46.325	64196	58795	63995	69575
2014-10-20 19:10:46.329	64186	58794	63999	69566
2014-10-20 19:10:46.335	64186	58806	63999	69547
2014-10-20 19:10:46.339	64186	58801	64000	69513
2014-10-20 19:10:46.345	64191	58793	64017	69549
2014-10-20 19:10:46.349	64193	58803	64020	69554
2014-10-20 19:10:46.355	64184	58806	64022	69554
2014-10-20 19:10:46.359	64169	58798	64039	69548
2014-10-20 19:10:46.365	64185	58797	64038	69500
2014-10-20 19:10:46.369	64202	58789	63996	69500
2014-10-20 19:10:46.375	64179	58792	63964	69506
2014-10-20 19:10:46.380	64167	58806	63954	69537
2014-10-20 19:10:46.384	64186	58792	63952	69582
2014-10-20 19:10:46.390	64199	58784	63982	69581
2014-10-20 19:10:46.394	64180	58802	64001	69564
2014-10-20 19:10:46.400	64175	58800	64012	69542
2014-10-20 19:10:46.404	64175	58795	64016	69545
2014-10-20 19:10:46.410	64170	58807	64013	69556
2014-10-20 19:10:46.414	64177	58801	64020	69569
2014-10-20 19:10:46.420	64174	58788	63997	69586
2014-10-20 19:10:46.424	64185	58796	63967	69586
2014-10-20 19:10:46.430	64196	58797	63950	69601
2014-10-20 19:10:46.434	64180	58787	63933	69590
2014-10-20 19:10:46.440	64177	58797	63918	69580
2014-10-20 19:10:46.444	64183	58801	63930	69611
2014-10-20 19:10:46.450	64169	58791	63976	69598
2014-10-20 19:10:46.454	64189	58795	63993	69582
2014-10-20 19:10:46.460	64192	58794	63989	69582
2014-10-20 19:10:46.464	64175	58781	64004	69555
2014-10-20 19:10:46.470	64190	58789	64007	69547
2014-10-20 19:10:46.474	64178	58795	64008	69535
2014-10-20 19:10:46.480	64188	58799	64014	69509
2014-10-20 19:10:46.484	64182	58799	64027	69512
2014-10-20 19:10:46.490	64155	58793	64037	69528
2014-10-20 19:10:46.494	64193	58804	64019	69542
2014-10-20 19:10:46.500	64189	58796	64013	69546
2014-10-20 19:10:46.505	64167	58791	64007	69547
2014-10-20 19:10:46.509	64173	58805	63990	69562
2014-10-20 19:10:46.515	64184	58797	63992	69567
2014-10-20 19:10:46.519	64186	58790	64009	69565
2014-10-20 19:10:46.525	64165	58793	64017	69573
2014-10-20 19:10:46.529	64175	58795	64006	69592
2014-10-20 19:10:46.535	64176	58789	63999	69602
2014-10-20 19:10:46.539	64160	58794	63974	69593
2014-10-20 19:10:46.545	64177	58810	63956	69598
2014-10-20 19:10:46.549	64176	58794	63969	69600
2014-10-20 19:10:46.555	64163	58785	63970	69576
2014-10-20 19:10:46.559	64176	58797	63986	69550
2014-10-20 19:10:46.565	64179	58794	63995	69524
2014-10-20 19:10:46.569	64176	58793	63993	69547
2014-10-20 19:10:46.575	64174	58799	64001	69593
2014-10-20 19:10:46.579	64166	58800	63990	69596
2014-10-20 19:10:46.585	64191	58785	63992	69580
2014-10-20 19:10:46.589	64189	58780	63990	69561
2014-10-20 19:10:46.595	64165	58805	63972	69537
2014-10-20 19:10:46.599	64180	58808	63979	69514
2014-10-20 19:10:46.605	64183	58801	63993	69503
2014-10-20 19:10:46.609	64175	58811	63979	69486
2014-10-20 19:10:46.615	64189	58799	63974	69497
2014-10-20 19:10:46.619	64190	58788	63987	69547
2014-10-20 19:10:46.625	64178	58803	63988	69562
2014-10-20 19:10:46.630	64177	58795	63997	69591
2014-10-20 19:10:46.634	64177	58777	63984	69605
2014-10-20 19:10:46.640	64175	58793	63942	69565
2014-10-20 19:10:46.644	64181	58806	63938	69571
2014-10-20 19:10:46.650	64185	58795	63968	69573
2014-10-20 19:10:46.654	64179	58787	63996	69561
2014-10-20 19:10:46.660	64177	58787	63992	69579
2014-10-20 19:10:46.664	64174	58794	63992	69577
2014-10-20 19:10:46.670	64185	58793	63978	69584
2014-10-20 19:10:46.674	64195	58794	63945	69594
2014-10-20 19:10:46.680	64183	58799	63950	69575
2014-10-20 19:10:46.684	64180	58796	63952	69538
2014-10-20 19:10:46.690	64182	58804	63971	69516
2014-10-20 19:10:46.694	64198	58798	63973	69531
2014-10-20 19:10:46.700	64189	58784	63950	69541
2014-10-20 19:10:46.704	64172	58800	63972	69552
2014-10-20 19:10:46.710	64173	58790	63994	69561
2014-10-20 19:10:46.714	64182	58789	64003	69563
2014-10-20 19:10:46.720	64185	58806	64002	69566
2014-10-20 19:10:46.724	64183	58797	63998	69549
2014-10-20 19:10:46.730	64192	58795	64011	69545
2014-10-20 19:10:46.734	64178	58787	64006	69560
2014-10-20 19:10:46.740	64177	58802	63999	69566
2014-10-20 19:10:46.744	64189	58807	64009	69557
2014-10-20 19:10:46.750	64180	58787	64011	69553
2014-10-20 19:10:46.755	64183	58804	64009	69581
2014-10-20 19:10:46.759	64180	58807	64003	69592
2014-10-20 19:10:46.765	64187	58795	63979	69570
2014-10-20 19:10:46.769	64192	58800	63980	69560
2014-10-20 19:10:46.775	64187	58810	63986	69565
2014-10-20 19:10:46.779	64186	58801	63952	69569
2014-10-20 19:10:46.785	64189	58796	63957	69591
2014-10-20 19:10:46.789	64190	58815	63970	69606
2014-10-20 19:10:46.795	64189	58798	63967	69582
2014-10-20 19:10:46.799	64203	58793	63983	69552
2014-10-20 19:10:46.805	64192	58805	63993	69531
2014-10-20 19:10:46.809	64188	58795	64014	69511
2014-10-20 19:10:46.815	64199	58801	64005	69501
2014-10-20 19:10:46.819	64182	58798	63981	69537
2014-10-20 19:10:46.825	64183	58800	63978	69573
2014-10-20 19:10:46.829	64198	58808	63987	69572
2014-10-20 19:10:46.835	64191	58800	64014	69567
2014-10-20 19:10:46.839	64182	58795	64000	69553
2014-10-20 19:10:46.845	64200	58803	63980	69574
2014-10-20 19:10:46.849	64209	58816	63993	69604
2014-10-20 19:10:46.855	64180	58802	63998	69606
2014-10-20 19:10:46.859	64183	58793	63989	69618
2014-10-20 19:10:46.865	64195	58797	63965	69600
2014-10-20 19:10:46.869	64174	58796	63968	69560
2014-10-20 19:10:46.875	64178	58809	63979	69554
2014-10-20 19:10:46.880	64192	58809	63976	69546
2014-10-20 19:10:46.884	64197	58802	63985	69511
2014-10-20 19:10:46.890	64205	58803	63986	69487
2014-10-20 19:10:46.894	64186	58809	63989	69499
2014-10-20 19:10:46.900	64187	58816	63988	69535
2014-10-20 19:10:46.904	64207	58809	63994	69565
2014-10-20 19:10:46.910	64190	58809	64020	69578
2014-10-20 19:10:46.914	64190	58824	64027	69588
2014-10-20 19:10:46.920	64205	58816	64012	69582
2014-10-20 19:10:46.924	64192	58801	63986	69584
2014-10-20 19:10:46.930	64178	58813	63985	69601
2014-10-20 19:10:46.934	64193	58806	63996	69595
2014-10-20 19:10:46.940	64200	58796	63975	69571
2014-10-20 19:10:46.944	64192	58814	63961	69548
2014-10-20 19:10:46.950	64208	58817	63972	69554
2014-10-20 19:10:46.954	64200	58810	63990	69577
2014-10-20 19:10:46.960	64186	58803	64001	69606
2014-10-20 19:10:46.964	64193	58813	64001	69629
2014-10-20 19:10:46.970	64190	58820	64003	69615
2014-10-20 19:10:46.974	64201	58808	64010	69604
2014-10-20 19:10:46.980	64193	58815	64012	69578
2014-10-20 19:10:46.984	64196	58811	63995	69547
2014-10-20 19:10:46.990	64208	58801	63983	69537
2014-10-20 19:10:46.994	64190	58806	63990	69527
2014-10-20 19:10:47.000	64186	58810	63998	69547
2014-10-20 19:10:47.005	64196	58807	64002	69553
2014-10-20 19:10:47.009	64203	58814	64012	69537
2014-10-20 19:10:47.015	64205	58826	64021	69512
2014-10-20 19:10:47.019	64210	58812	64009	69522
2014-10-20 19:10:47.025	64190	58807	64007	69585
2014-10-20 19:10:47.029	64195	58815	64015	69595
2014-10-20 19:10:47.035	64215	58807	64026	69641
2014-10-20 19:10:47.039	64193	58806	64038	69674
2014-10-20 19:10:47.045	64195	58817	64005	69635
2014-10-20 19:10:47.049	64197	58816	63981	69624
2014-10-20 19:10:47.055	64196	58818	63991	69573
2014-10-20 19:10:47.059	64192	58824	63969	69532
2014-10-20 19:10:47.065	64197	58808	63962	69554
2014-10-20 19:10:47.069	64218	58809	63973	69576
2014-10-20 19:10:47.075	64201	58822	63971	69590
2014-10-20 19:10:47.079	64196	58812	63995	69587
2014-10-20 19:10:47.085	64212	58820	64020	69560
2014-10-20 19:10:47.089	64206	58818	64006	69516
2014-10-20 19:10:47.095	64214	58813	63996	69502
2014-10-20 19:10:47.099	64218	58825	64004	69501
2014-10-20 19:10:47.105	64206	58813	64012	69514
2014-10-20 19:10:47.109	64201	58816	64013	69575
2014-10-20 19:10:47.115	64201	58827	63989	69626
2014-10-20 19:10:47.119	64212	58819	63999	69627
2014-10-20 19:10:47.125	64206	58817	64027	69598
2014-10-20 19:10:47.130	64207	58823	64013	69589
2014-10-20 19:10:47.134	64217	58830	64021	69601
2014-10-20 19:10:47.140	64210	58821	64028	69614
2014-10-20 19:10:47.144	64213	58822	64012	69634
2014-10-20 19:10:47.150	64208	58836	64017	69622
2014-10-20 19:10:47.154	64207	58825	64017	69592
2014-10-20 19:10:47.160	64205	58817	64017	69591
2014-10-20 19:10:47.164	64204	58828	64025	69576
2014-10-20 19:10:47.170	64223	58818	64025	69560
2014-10-20 19:10:47.174	64219	58811	64017	69546
2014-10-20 19:10:47.180	64203	58831	63999	69526
2014-10-20 19:10:47.184	64221	58815	63972	69534
2014-10-20 19:10:47.190	64223	58802	63961	69550
2014-10-20 19:10:47.194	64208	58828	63980	69587
2014-10-20 19:10:47.200	64208	58823	64003	69622
2014-10-20 19:10:47.204	64214	58811	64010	69640
2014-10-20 19:10:47.210	64211	58827	64004	69639
2014-10-20 19:10:47.214	64195	58822	64010	69591
2014-10-20 19:10:47.220	64215	58817	64026	69580
2014-10-20 19:10:47.224	64232	58823	64034	69594
2014-10-20 19:10:47.230	64215	58825	64019	69577
2014-10-20 19:10:47.234	64207	58823	63988	69579
2014-10-20 19:10:47.240	64217	58814	63980	69578
2014-10-20 19:10:47.244	64233	58819	63994	69554
2014-10-20 19:10:47.250	64211	58832	64016	69524
2014-10-20 19:10:47.255	64208	58832	64043	69525
2014-10-20 19:10:47.259	64229	58830	64050	69559
2014-10-20 19:10:47.265	64223	58821	64038	69574
2014-10-20 19:10:47.269	64217	58820	64018	69600
2014-10-20 19:10:47.275	64217	58827	64024	69631
2014-10-20 19:10:47.279	64215	58820	64037	69640
2014-10-20 19:10:47.285	64217	58824	64013	69632
2014-10-20 19:10:47.289	64233	58829	64003	69586
2014-10-20 19:10:47.295	64227	58828	64006	69577
2014-10-20 19:10:47.299	64211	58835	64006	69598
2014-10-20 19:10:47.305	64216	58829	64027	69584
2014-10-20 19:10:47.309	64228	58820	64035	69587
2014-10-20 19:10:47.315	64227	58817	64028	69583
2014-10-20 19:10:47.319	64211	58831	64018	69576
2014-10-20 19:10:47.325	64225	58831	64003	69592
2014-10-20 19:10:47.329	64239	58812	63997	69608
2014-10-20 19:10:47.335	64212	58824	63997	69616
2014-10-20 19:10:47.339	64213	58833	63995	69604
2014-10-20 19:10:47.345	64223	58835	64021	69604
2014-10-20 19:10:47.349	64223	58827	64042	69618
2014-10-20 19:10:47.355	64231	58815	64039	69629
2014-10-20 19:10:47.359	64220	58847	64040	69637
2014-10-20 19:10:47.365	64231	58840	64026	69638
2014-10-20 19:10:47.369	64230	58811	64035	69635
2014-10-20 19:10:47.375	64208	58836	64046	69610
2014-10-20 19:10:47.380	64231	58835	64016	69583
2014-10-20 19:10:47.384	64233	58815	64022	69570
2014-10-20 19:10:47.390	64219	58825	64041	69546
2014-10-20 19:10:47.394	64225	58838	64034	69509
2014-10-20 19:10:47.400	64236	58834	64049	69510
2014-10-20 19:10:47.404	64219	58826	64051	69531
2014-10-20 19:10:47.410	64212	58836	64035	69548
2014-10-20 19:10:47.414	64228	58832	64031	69569
2014-10-20 19:10:47.420	64216	58816	64014	69574
2014-10-20 19:10:47.424	64227	58830	64019	69606
2014-10-20 19:10:47.430	64229	58838	64029	69627
2014-10-20 19:10:47.434	64239	58821	64024	69637
2014-10-20 19:10:47.440	64232	58827	64031	69681
2014-10-20 19:10:47.444	64205	58836	64017	69687
2014-10-20 19:10:47.450	64264	58830	64018	69695
2014-10-20 19:10:47.454	64243	58812	64022	69707
2014-10-20 19:10:47.460	64196	58813	64004	69669
2014-10-20 19:10:47.464	64241	58837	64014	69634
2014-10-20 19:10:47.470	64252	58832	64026	69598
2014-10-20 19:10:47.474	64243	58826	64014	69566
2014-10-20 19:10:47.480	64232	58821	64010	69548
2014-10-20 19:10:47.484	64232	58830	64026	69543
2014-10-20 19:10:47.490	64251	58850	64038	69539
2014-10-20 19:10:47.494	64232	58836	64049	69510
2014-10-20 19:10:47.500	64230	58824	64049	69521
2014-10-20 19:10:47.505	64254	58838	64040	69543
2014-10-20 19:10:47.509	64238	58847	64045	69542
2014-10-20 19:10:47.515	64229	58834	64040	69580
2014-10-20 19:10:47.519	64235	58831	64029	69609
2014-10-20 19:10:47.525	64247	58823	64025	69613
2014-10-20 19:10:47.529	64240	58828	64020	69633
2014-10-20 19:10:47.535	64226	58843	64027	69640
2014-10-20 19:10:47.539	64265	58822	64049	69649
2014-10-20 19:10:47.545	64249	58826	64067	69681
2014-10-20 19:10:47.549	64214	58835	64039	69681
2014-10-20 19:10:47.555	64243	58829	64023	69666
2014-10-20 19:10:47.559	64247	58831	64039	69657
2014-10-20 19:10:47.565	64232	58834	64027	69613
2014-10-20 19:10:47.569	64225	58839	64047	69581
2014-10-20 19:10:47.575	64241	58834	64060	69578
2014-10-20 19:10:47.579	64245	58836	64040	69568
2014-10-20 19:10:47.585	64221	58831	64040	69560
2014-10-20 19:10:47.589	64233	58834	64036	69551
2014-10-20 19:10:47.595	64246	58833	64038	69553
2014-10-20 19:10:47.599	64233	58820	64045	69573
2014-10-20 19:10:47.605	64230	58837	64052	69575
2014-10-20 19:10:47.609	64257	58839	64053	69568
2014-10-20 19:10:47.615	64254	58840	64030	69604
2014-10-20 19:10:47.619	64227	58837	64035	69640
2014-10-20 19:10:47.625	64246	58826	64055	69650
2014-10-20 19:10:47.630	64259	58843	64070	69662
2014-10-20 19:10:47.634	64236	58840	64071	69656
2014-10-20 19:10:47.640	64226	58836	64057	69639
2014-10-20 19:10:47.644	64234	58842	64072	69626
2014-10-20 19:10:47.650	64251	58836	64079	69638
2014-10-20 19:10:47.654	64247	58831	64065	69624
2014-10-20 19:10:47.660	64225	58825	64050	69580
2014-10-20 19:10:47.664	64239	58827	64041	69577
2014-10-20 19:10:47.670	64244	58830	64060	69588
2014-10-20 19:10:47.674	64233	58838	64067	69597
2014-10-20 19:10:47.680	64254	58834	64058	69600
2014-10-20 19:10:47.684	64257	58836	64056	69595
2014-10-20 19:10:47.690	64255	58845	64050	69598
2014-10-20 19:10:47.694	64249	58828	64032	69580
2014-10-20 19:10:47.700	64244	58837	64021	69567
2014-10-20 19:10:47.704	64256	58831	64037	69586
2014-10-20 19:10:47.710	64241	58825	64059	69615
2014-10-20 19:10:47.714	64235	58849	64061	69636
2014-10-20 19:10:47.720	64240	58838	64053	69657
2014-10-20 19:10:47.724	64246	58835	64062	69675
2014-10-20 19:10:47.730	64252	58837	64054	69674
2014-10-20 19:10:47.734	64240	58830	64045	69666
2014-10-20 19:10:47.740	64246	58831	64058	69656
2014-10-20 19:10:47.744	64249	58823	64056	69649
2014-10-20 19:10:47.750	64243	58835	64062	69622
2014-10-20 19:10:47.755	64247	58838	64058	69616
2014-10-20 19:10:47.759	64232	58832	64062	69629
2014-10-20 19:10:47.765	64243	58841	64081	69574
2014-10-20 19:10:47.769	64256	58834	64066	69570
2014-10-20 19:10:47.775	64239	58824	64041	69606
2014-10-20 19:10:47.779	64248	58823	64025	69591
2014-10-20 19:10:47.785	64260	58825	64031	69587
2014-10-20 19:10:47.789	64243	58838	64054	69583
2014-10-20 19:10:47.795	64232	58850	64066	69590
2014-10-20 19:10:47.799	64246	58845	64058	69595
2014-10-20 19:10:47.805	64250	58845	64045	69576
2014-10-20 19:10:47.809	64237	58849	64048	69579
2014-10-20 19:10:47.815	64242	58840	64064	69604
2014-10-20 19:10:47.819	64252	58841	64064	69641
2014-10-20 19:10:47.825	64259	58846	64054	69653
2014-10-20 19:10:47.829	64257	58842	64061	69663
2014-10-20 19:10:47.835	64241	58844	64054	69684
2014-10-20 19:10:47.839	64250	58848	64049	69668
2014-10-20 19:10:47.845	64258	58831	64059	69667
2014-10-20 19:10:47.849	64254	58825	64062	69673
2014-10-20 19:10:47.855	64243	58837	64063	69643
2014-10-20 19:10:47.859	64255	58841	64065	69626
2014-10-20 19:10:47.865	64271	58836	64083	69615
2014-10-20 19:10:47.869	64225	58832	64092	69587
2014-10-20 19:10:47.875	64229	58839	64092	69560
2014-10-20 19:10:47.880	64278	58842	64097	69539
2014-10-20 19:10:47.884	64270	58837	64091	69556
2014-10-20 19:10:47.890	64242	58835	64093	69605
2014-10-20 19:10:47.894	64237	58842	64079	69626
2014-10-20 19:10:47.900	64263	58835	64060	69607
2014-10-20 19:10:47.904	64262	58828	64053	69593
2014-10-20 19:10:47.910	64246	58849	64034	69585
2014-10-20 19:10:47.914	64261	58839	64041	69579
2014-10-20 19:10:47.920	64262	58833	64066	69644
2014-10-20 19:10:47.924	64245	58852	64068	69700
2014-10-20 19:10:47.930	64244	58835	64055	69673
2014-10-20 19:10:47.934	64247	58832	64045	69666
2014-10-20 19:10:47.940	64245	58839	64049	69677
2014-10-20 19:10:47.944	64263	58826	64048	69620
2014-10-20 19:10:47.950	64248	58838	64063	69566
2014-10-20 19:10:47.954	64236	58847	64094	69566
2014-10-20 19:10:47.960	64260	58843	64091	69580
2014-10-20 19:10:47.964	64260	58842	64079	69617
2014-10-20 19:10:47.970	64256	58837	64067	69656
2014-10-20 19:10:47.974	64245	58838	64047	69666
2014-10-20 19:10:47.980	64249	58827	64051	69667
2014-10-20 19:10:47.984	64269	58831	64043	69660
2014-10-20 19:10:47.990	64257	58845	64037	69651
2014-10-20 19:10:47.994	64251	58829	64066	69630
2014-10-20 19:10:48.000	64269	58829	64059	69594
2014-10-20 19:10:48.005	64280	58841	64057	69577
2014-10-20 19:10:48.009	64264	58842	64092	69590
2014-10-20 19:10:48.015	64263	58836	64101	69608
2014-10-20 19:10:48.019	64261	58840	64097	69628
2014-10-20 19:10:48.025	64239	58850	64083	69631
2014-10-20 19:10:48.029	64271	58837	64068	69602
2014-10-20 19:10:48.035	64277	58842	64082	69589
2014-10-20 19:10:48.039	64252	58852	64085	69601
2014-10-20 19:10:48.045	64259	58844	64067	69640
2014-10-20 19:10:48.049	64259	58841	64068	69674
2014-10-20 19:10:48.055	64262	58851	64065	69675
2014-10-20 19:10:48.059	64257	58858	64051	69685
2014-10-20 19:10:48.065	64275	58841	64051	69673
2014-10-20 19:10:48.069	64270	58846	64050	69634
2014-10-20 19:10:48.075	64245	58843	64065	69611
2014-10-20 19:10:48.079	64265	58828	64081	69592
2014-10-20 19:10:48.085	64263	58850	64062	69589
2014-10-20 19:10:48.089	64267	58851	64065	69595
2014-10-20 19:10:48.095	64261	58845	64077	69610
2014-10-20 19:10:48.099	64251	58859	64074	69638
2014-10-20 19:10:48.105	64264	58860	64076	69611
2014-10-20 19:10:48.109	64250	58850	64070	69591
2014-10-20 19:10:48.115	64258	58846	64065	69608
2014-10-20 19:10:48.119	64276	58861	64060	69622
2014-10-20 19:10:48.125	64267	58859	64076	69665
2014-10-20 19:10:48.130	64259	58851	64103	69664
2014-10-20 19:10:48.134	64265	58862	64122	69636
2014-10-20 19:10:48.140	64274	58860	64137	69640
2014-10-20 19:10:48.144	64265	58853	64131	69649
2014-10-20 19:10:48.150	64262	58856	64111	69671
2014-10-20 19:10:48.154	64266	58866	64102	69673
2014-10-20 19:10:48.160	64258	58853	64103	69653
2014-10-20 19:10:48.164	64254	58849	64093	69637
2014-10-20 19:10:48.170	64256	58875	64090	69626
2014-10-20 19:10:48.174	64268	58862	64085	69644
2014-10-20 19:10:48.180	64272	58847	64069	69647
2014-10-20 19:10:48.184	64262	58860	64070	69629
2014-10-20 19:10:48.190	64267	58854	64052	69618
2014-10-20 19:10:48.194	64266	58852	64032	69599
2014-10-20 19:10:48.200	64259	58852	64054	69607
2014-10-20 19:10:48.204	64263	58854	64088	69640
2014-10-20 19:10:48.210	64266	58858	64092	69664
2014-10-20 19:10:48.214	64265	58848	64088	69675
2014-10-20 19:10:48.220	64268	58858	64099	69665
2014-10-20 19:10:48.224	64278	58862	64100	69661
2014-10-20 19:10:48.230	64270	58852	64092	69645
2014-10-20 19:10:48.234	64271	58858	64099	69612
2014-10-20 19:10:48.240	64287	58861	64101	69620
2014-10-20 19:10:48.244	64268	58862	64076	69609
2014-10-20 19:10:48.250	64261	58849	64084	69590
2014-10-20 19:10:48.255	64279	58852	64115	69608
2014-10-20 19:10:48.259	64284	58864	64102	69617
2014-10-20 19:10:48.265	64273	58855	64093	69624
2014-10-20 19:10:48.269	64264	58863	64082	69654
2014-10-20 19:10:48.275	64277	58867	64072	69678
2014-10-20 19:10:48.279	64280	58860	64086	69683
2014-10-20 19:10:48.285	64267	58858	64075	69676
2014-10-20 19:10:48.289	64282	58871	64070	69676
2014-10-20 19:10:48.295	64277	58863	64083	69670
2014-10-20 19:10:48.299	64256	58842	64069	69645
2014-10-20 19:10:48.305	64272	58865	64077	69660
2014-10-20 19:10:48.309	64279	58865	64093	69675
2014-10-20 19:10:48.315	64270	58861	64074	69663
2014-10-20 19:10:48.319	64272	58876	64070	69684
2014-10-20 19:10:48.325	64279	58871	64074	69681
2014-10-20 19:10:48.329	64282	58872	64080	69649
2014-10-20 19:10:48.335	64277	58856	64089	69622
2014-10-20 19:10:48.339	64285	58859	64092	69607
2014-10-20 19:10:48.345	64296	58882	64118	69609
2014-10-20 19:10:48.349	64282	58877	64128	69614
2014-10-20 19:10:48.355	64277	58864	64110	69629
2014-10-20 19:10:48.359	64296	58853	64095	69627
2014-10-20 19:10:48.365	64280	58867	64086	69627
2014-10-20 19:10:48.369	64271	58871	64091	69638
2014-10-20 19:10:48.375	64285	58860	64088	69669
2014-10-20 19:10:48.380	64283	58875	64066	69711
2014-10-20 19:10:48.384	64293	58877	64056	69722
2014-10-20 19:10:48.390	64284	58878	64061	69733
2014-10-20 19:10:48.394	64284	58884	64066	69723
2014-10-20 19:10:48.400	64280	58877	64071	69697
2014-10-20 19:10:48.404	64265	58874	64074	69662
2014-10-20 19:10:48.410	64300	58868	64070	69610
2014-10-20 19:10:48.414	64290	58870	64066	69604
2014-10-20 19:10:48.420	64276	58873	64080	69616
2014-10-20 19:10:48.424	64290	58875	64112	69608
2014-10-20 19:10:48.430	64278	58877	64110	69613
2014-10-20 19:10:48.434	64299	58876	64100	69626
2014-10-20 19:10:48.440	64295	58886	64116	69629
2014-10-20 19:10:48.444	64276	58881	64104	69642
2014-10-20 19:10:48.450	64284	58879	64091	69664
2014-10-20 19:10:48.454	64285	58884	64109	69682
2014-10-20 19:10:48.460	64300	58882	64122	69687
2014-10-20 19:10:48.464	64285	58885	64108	69686
2014-10-20 19:10:48.470	64283	58882	64093	69709
2014-10-20 19:10:48.474	64298	58883	64127	69733
2014-10-20 19:10:48.480	64289	58893	64155	69742
2014-10-20 19:10:48.484	64293	58894	64130	69744
2014-10-20 19:10:48.490	64290	58883	64114	69727
2014-10-20 19:10:48.494	64298	58886	64122	69697
2014-10-20 19:10:48.500	64295	58888	64128	69655
2014-10-20 19:10:48.505	64281	58884	64137	69638
2014-10-20 19:10:48.509	64306	58893	64136	69636
2014-10-20 19:10:48.515	64313	58893	64123	69614
2014-10-20 19:10:48.519	64292	58885	64117	69604
2014-10-20 19:10:48.525	64289	58897	64111	69598
2014-10-20 19:10:48.529	64305	58910	64093	69606
2014-10-20 19:10:48.535	64305	58897	64087	69633
2014-10-20 19:10:48.539	64287	58892	64101	69637
2014-10-20 19:10:48.545	64296	58898	64105	69669
2014-10-20 19:10:48.549	64313	58905	64107	69704
2014-10-20 19:10:48.555	64313	58905	64102	69707
2014-10-20 19:10:48.559	64302	58886	64106	69732
2014-10-20 19:10:48.565	64301	58901	64108	69751
2014-10-20 19:10:48.569	64326	58914	64101	69753
2014-10-20 19:10:48.575	64316	58891	64116	69745
2014-10-20 19:10:48.579	64307	58895	64117	69732
2014-10-20 19:10:48.585	64330	58908	64120	69750
2014-10-20 19:10:48.589	64325	58902	64124	69738
2014-10-20 19:10:48.595	64310	58912	64113	69679
2014-10-20 19:10:48.599	64306	58903	64115	69663
2014-10-20 19:10:48.605	64317	58892	64111	69640
2014-10-20 19:10:48.609	64323	58906	64119	69610
2014-10-20 19:10:48.615	64312	58907	64115	69635
2014-10-20 19:10:48.619	64306	58906	64089	69640
2014-10-20 19:10:48.625	64319	58900	64094	69637
2014-10-20 19:10:48.630	64324	58910	64120	69646
2014-10-20 19:10:48.634	64312	58921	64123	69666
2014-10-20 19:10:48.640	64316	58901	64117	69719
2014-10-20 19:10:48.644	64319	58911	64124	69722
2014-10-20 19:10:48.650	64319	58918	64124	69681
2014-10-20 19:10:48.654	64323	58909	64118	69655
2014-10-20 19:10:48.660	64320	58918	64138	69663
2014-10-20 19:10:48.664	64324	58924	64157	69701
2014-10-20 19:10:48.670	64329	58920	64154	69737
2014-10-20 19:10:48.674	64319	58915	64151	69793
2014-10-20 19:10:48.680	64318	58923	64136	69820
2014-10-20 19:10:48.684	64319	58924	64121	69811
2014-10-20 19:10:48.690	64316	58912	64129	69796
2014-10-20 19:10:48.694	64328	58920	64131	69755
2014-10-20 19:10:48.700	64330	58929	64135	69705
2014-10-20 19:10:48.704	64328	58923	64144	69625
2014-10-20 19:10:48.710	64321	58921	64122	69584
2014-10-20 19:10:48.714	64326	58933	64119	69596
2014-10-20 19:10:48.720	64342	58936	64144	69598
2014-10-20 19:10:48.724	64335	58918	64158	69645
2014-10-20 19:10:48.730	64335	58929	64153	69679
2014-10-20 19:10:48.734	64336	58940	64133	69657
2014-10-20 19:10:48.740	64340	58911	64129	69655
2014-10-20 19:10:48.744	64338	58913	64143	69681
2014-10-20 19:10:48.750	64334	58928	64159	69700
2014-10-20 19:10:48.755	64338	58934	64142	69709
2014-10-20 19:10:48.759	64329	58936	64129	69740
2014-10-20 19:10:48.765	64340	58933	64139	69781
2014-10-20 19:10:48.769	64333	58949	64127	69827
2014-10-20 19:10:48.775	64329	58931	64121	69830
2014-10-20 19:10:48.779	64343	58921	64111	69811
2014-10-20 19:10:48.785	64337	58941	64102	69790
2014-10-20 19:10:48.789	64343	58937	64100	69739
2014-10-20 19:10:48.795	64342	58949	64104	69712
2014-10-20 19:10:48.799	64351	58946	64106	69698
2014-10-20 19:10:48.805	64350	58937	64096	69701
2014-10-20 19:10:48.809	64338	58956	64127	69705
2014-10-20 19:10:48.815	64350	58955	64152	69688
2014-10-20 19:10:48.819	64357	58950	64159	69684
2014-10-20 19:10:48.825	64358	58948	64173	69661
2014-10-20 19:10:48.829	64351	58951	64179	69643
2014-10-20 19:10:48.835	64356	58953	64186	69652
2014-10-20 19:10:48.839	64360	58942	64171	69664
2014-10-20 19:10:48.845	64339	58949	64168	69672
2014-10-20 19:10:48.849	64336	58955	64176	69675
2014-10-20 19:10:48.855	64359	58949	64174	69710
2014-10-20 19:10:48.859	64363	58948	64176	69750
2014-10-20 19:10:48.865	64357	58943	64174	69783
2014-10-20 19:10:48.869	64355	58952	64186	69812
2014-10-20 19:10:48.875	64362	58966	64180	69817
2014-10-20 19:10:48.880	64371	58960	64163	69843
2014-10-20 19:10:48.884	64355	58954	64153	69852
2014-10-20 19:10:48.890	64367	58964	64132	69808
2014-10-20 19:10:48.894	64365	58964	64140	69779
2014-10-20 19:10:48.900	64366	58964	64153	69748
2014-10-20 19:10:48.904	64384	58970	64150	69692
2014-10-20 19:10:48.910	64347	58969	64166	69676
2014-10-20 19:10:48.914	64367	58970	64176	69682
2014-10-20 19:10:48.920	64371	58968	64175	69667
2014-10-20 19:10:48.924	64357	58963	64180	69665
2014-10-20 19:10:48.930	64373	58954	64174	69689
2014-10-20 19:10:48.934	64349	58961	64158	69703
2014-10-20 19:10:48.940	64379	58976	64146	69698
2014-10-20 19:10:48.944	64383	58959	64134	69708
2014-10-20 19:10:48.950	64362	58957	64144	69739
2014-10-20 19:10:48.954	64380	58983	64167	69780
2014-10-20 19:10:48.960	64376	58984	64167	69810
2014-10-20 19:10:48.964	64381	58960	64170	69808
2014-10-20 19:10:48.970	64381	58970	64173	69806
2014-10-20 19:10:48.974	64383	58984	64160	69822
2014-10-20 19:10:48.980	64368	58980	64167	69828
2014-10-20 19:10:48.984	64367	58996	64189	69819
2014-10-20 19:10:48.990	64395	58987	64189	69785
2014-10-20 19:10:48.994	64391	58972	64195	69747
[truncated: 11,000 more rows]
