# Supplementary material for: Seismic monitoring of small alpine rockfalls – validity, precision and limitations
Source: Copernicus journal article supplement (doi:10.5194/esurf-5-653-2017), 2017-10-16
Supplement: Supplementary file 2 [file esurf-5-653-2017-supplement.zip › event_4.txt]

Time	LAU02	LAU03	LAU04	LAU05
2014-10-20 15:05:04.005	63568	68354	63088	69919
2014-10-20 15:05:04.009	63564	68342	63074	69931
2014-10-20 15:05:04.015	63557	68361	63060	69971
2014-10-20 15:05:04.019	63554	68353	63050	70000
2014-10-20 15:05:04.025	63551	68346	63066	70019
2014-10-20 15:05:04.029	63569	68355	63074	70050
2014-10-20 15:05:04.035	63557	68350	63064	70048
2014-10-20 15:05:04.039	63553	68355	63066	70054
2014-10-20 15:05:04.045	63563	68358	63069	70084
2014-10-20 15:05:04.049	63542	68344	63070	70098
2014-10-20 15:05:04.055	63548	68341	63083	70123
2014-10-20 15:05:04.059	63542	68347	63074	70131
2014-10-20 15:05:04.065	63533	68347	63067	70117
2014-10-20 15:05:04.069	63543	68343	63067	70098
2014-10-20 15:05:04.075	63531	68343	63036	70059
2014-10-20 15:05:04.079	63541	68338	63037	70015
2014-10-20 15:05:04.085	63550	68337	63054	69994
2014-10-20 15:05:04.089	63538	68335	63059	69985
2014-10-20 15:05:04.095	63532	68326	63066	69970
2014-10-20 15:05:04.099	63529	68339	63055	69964
2014-10-20 15:05:04.105	63532	68337	63066	69967
2014-10-20 15:05:04.109	63530	68321	63064	69977
2014-10-20 15:05:04.115	63535	68341	63045	69980
2014-10-20 15:05:04.119	63539	68335	63057	69981
2014-10-20 15:05:04.125	63528	68329	63061	69990
2014-10-20 15:05:04.130	63528	68354	63058	69987
2014-10-20 15:05:04.134	63537	68338	63060	69981
2014-10-20 15:05:04.140	63528	68336	63063	69993
2014-10-20 15:05:04.144	63524	68341	63086	70037
2014-10-20 15:05:04.150	63541	68329	63103	70085
2014-10-20 15:05:04.154	63528	68346	63091	70109
2014-10-20 15:05:04.160	63514	68331	63076	70089
2014-10-20 15:05:04.164	63528	68327	63063	70050
2014-10-20 15:05:04.170	63514	68338	63055	70060
2014-10-20 15:05:04.174	63523	68326	63052	70067
2014-10-20 15:05:04.180	63540	68330	63059	70064
2014-10-20 15:05:04.184	63523	68320	63068	70062
2014-10-20 15:05:04.190	63523	68328	63038	70022
2014-10-20 15:05:04.194	63514	68340	63009	69992
2014-10-20 15:05:04.200	63521	68324	63001	69976
2014-10-20 15:05:04.204	63531	68340	62969	69954
2014-10-20 15:05:04.210	63504	68331	62973	69929
2014-10-20 15:05:04.214	63514	68312	63005	69905
2014-10-20 15:05:04.220	63525	68327	63013	69910
2014-10-20 15:05:04.224	63507	68328	63034	69926
2014-10-20 15:05:04.230	63519	68322	63048	69948
2014-10-20 15:05:04.234	63530	68317	63029	69977
2014-10-20 15:05:04.240	63523	68323	63004	70013
2014-10-20 15:05:04.244	63522	68322	63001	70046
2014-10-20 15:05:04.250	63519	68309	63020	70069
2014-10-20 15:05:04.255	63515	68317	63054	70084
2014-10-20 15:05:04.259	63507	68318	63077	70067
2014-10-20 15:05:04.265	63505	68309	63068	70058
2014-10-20 15:05:04.269	63527	68315	63053	70063
2014-10-20 15:05:04.275	63529	68316	63032	70040
2014-10-20 15:05:04.279	63512	68310	63020	70021
2014-10-20 15:05:04.285	63519	68322	63038	69992
2014-10-20 15:05:04.289	63520	68315	63060	69983
2014-10-20 15:05:04.295	63509	68297	63067	69997
2014-10-20 15:05:04.299	63505	68304	63051	69956
2014-10-20 15:05:04.305	63504	68295	63049	69920
2014-10-20 15:05:04.309	63524	68299	63049	69926
2014-10-20 15:05:04.315	63516	68316	63036	69929
2014-10-20 15:05:04.319	63501	68312	63056	69936
2014-10-20 15:05:04.325	63520	68315	63065	69951
2014-10-20 15:05:04.329	63505	68314	63062	69972
2014-10-20 15:05:04.335	63492	68303	63060	69958
2014-10-20 15:05:04.339	63507	68301	63037	69947
2014-10-20 15:05:04.345	63505	68295	63036	69999
2014-10-20 15:05:04.349	63501	68299	63028	70045
2014-10-20 15:05:04.355	63502	68308	62987	70062
2014-10-20 15:05:04.359	63498	68298	62982	70072
2014-10-20 15:05:04.365	63490	68307	62996	70072
2014-10-20 15:05:04.369	63497	68310	63001	70048
2014-10-20 15:05:04.375	63504	68294	63021	70021
2014-10-20 15:05:04.380	63500	68303	63037	69984
2014-10-20 15:05:04.384	63502	68294	63037	69953
2014-10-20 15:05:04.390	63494	68295	63027	69955
2014-10-20 15:05:04.394	63498	68308	63015	69953
2014-10-20 15:05:04.400	63501	68292	63019	69967
2014-10-20 15:05:04.404	63486	68294	63030	69965
2014-10-20 15:05:04.410	63493	68288	63038	69929
2014-10-20 15:05:04.414	63503	68287	63046	69894
2014-10-20 15:05:04.420	63498	68306	63050	69883
2014-10-20 15:05:04.424	63478	68291	63036	69915
2014-10-20 15:05:04.430	63472	68285	63008	69948
2014-10-20 15:05:04.434	63492	68298	63007	69972
2014-10-20 15:05:04.440	63479	68299	63016	69987
2014-10-20 15:05:04.444	63467	68300	63014	69994
2014-10-20 15:05:04.450	63489	68289	63012	70013
2014-10-20 15:05:04.454	63495	68282	63014	70003
2014-10-20 15:05:04.460	63480	68289	63033	70009
2014-10-20 15:05:04.464	63475	68291	63062	70022
2014-10-20 15:05:04.470	63483	68278	63041	70020
2014-10-20 15:05:04.474	63482	68271	62996	70037
2014-10-20 15:05:04.480	63477	68289	62982	70012
2014-10-20 15:05:04.484	63484	68291	62961	69994
2014-10-20 15:05:04.490	63492	68276	62971	69988
2014-10-20 15:05:04.494	63487	68282	63007	69967
2014-10-20 15:05:04.500	63468	68290	63002	69973
2014-10-20 15:05:04.505	63473	68286	63005	69951
2014-10-20 15:05:04.509	63490	68298	63022	69929
2014-10-20 15:05:04.515	63485	68295	63043	69922
2014-10-20 15:05:04.519	63491	68287	63060	69900
2014-10-20 15:05:04.525	63486	68299	63044	69915
2014-10-20 15:05:04.529	63488	68289	63030	69928
2014-10-20 15:05:04.535	63493	68284	63029	69928
2014-10-20 15:05:04.539	63483	68291	63010	69939
2014-10-20 15:05:04.545	63483	68285	62992	69966
2014-10-20 15:05:04.549	63477	68293	62991	69985
2014-10-20 15:05:04.555	63480	68293	62989	69978
2014-10-20 15:05:04.559	63480	68283	62985	70003
2014-10-20 15:05:04.565	63483	68281	62989	70002
2014-10-20 15:05:04.569	63492	68276	63002	69974
2014-10-20 15:05:04.575	63479	68275	63021	69982
2014-10-20 15:05:04.579	63483	68287	63039	69982
2014-10-20 15:05:04.585	63492	68282	63030	70000
2014-10-20 15:05:04.589	63487	68271	63010	70035
2014-10-20 15:05:04.595	63483	68280	63020	70054
2014-10-20 15:05:04.599	63485	68283	63030	70028
2014-10-20 15:05:04.605	63492	68287	63025	69976
2014-10-20 15:05:04.609	63478	68280	63027	69944
2014-10-20 15:05:04.615	63470	68276	63029	69891
2014-10-20 15:05:04.619	63497	68296	63015	69859
2014-10-20 15:05:04.625	63483	68282	63015	69883
2014-10-20 15:05:04.630	63469	68277	63028	69894
2014-10-20 15:05:04.634	63481	68283	63025	69915
2014-10-20 15:05:04.640	63480	68267	63025	69969
2014-10-20 15:05:04.644	63483	68280	63015	70002
2014-10-20 15:05:04.650	63478	68287	63011	70004
2014-10-20 15:05:04.654	63481	68270	63025	69981
2014-10-20 15:05:04.660	63486	68275	63021	69944
2014-10-20 15:05:04.664	63479	68278	63005	69935
2014-10-20 15:05:04.670	63480	68265	62999	69961
2014-10-20 15:05:04.674	63479	68269	62996	69971
2014-10-20 15:05:04.680	63483	68290	62999	69966
2014-10-20 15:05:04.684	63474	68267	62992	69987
2014-10-20 15:05:04.690	63463	68256	62981	69994
2014-10-20 15:05:04.694	63470	68282	62987	69985
2014-10-20 15:05:04.700	63478	68271	62990	69988
2014-10-20 15:05:04.704	63477	68266	62997	69977
2014-10-20 15:05:04.710	63469	68275	63014	69977
2014-10-20 15:05:04.714	63485	68281	63038	69987
2014-10-20 15:05:04.720	63479	68269	63054	69984
2014-10-20 15:05:04.724	63465	68254	63045	69974
2014-10-20 15:05:04.730	63483	68284	63027	69977
2014-10-20 15:05:04.734	63479	68283	63014	69988
2014-10-20 15:05:04.740	63481	68272	63011	69966
2014-10-20 15:05:04.744	63483	68290	63002	69935
2014-10-20 15:05:04.750	63473	68270	62987	69901
2014-10-20 15:05:04.755	63479	68268	62986	69883
2014-10-20 15:05:04.759	63476	68288	62990	69892
2014-10-20 15:05:04.765	63478	68281	63007	69902
2014-10-20 15:05:04.769	63492	68279	63022	69928
2014-10-20 15:05:04.775	63482	68272	63029	69949
2014-10-20 15:05:04.779	63474	68278	63036	69969
2014-10-20 15:05:04.785	63482	68277	63012	69981
2014-10-20 15:05:04.789	63476	68254	62999	69971
2014-10-20 15:05:04.795	63475	68272	63010	69995
2014-10-20 15:05:04.799	63485	68281	63004	70015
2014-10-20 15:05:04.805	63482	68261	63008	70024
2014-10-20 15:05:04.809	63476	68284	63007	70027
2014-10-20 15:05:04.815	63478	68300	62993	69982
2014-10-20 15:05:04.819	63479	68282	62981	69964
2014-10-20 15:05:04.825	63481	68274	62972	69960
2014-10-20 15:05:04.829	63476	68288	62992	69972
2014-10-20 15:05:04.835	63485	68292	63004	70006
2014-10-20 15:05:04.839	63493	68275	63021	69977
2014-10-20 15:05:04.845	63482	68288	63041	69944
2014-10-20 15:05:04.849	63477	68300	63026	69907
2014-10-20 15:05:04.855	63476	68285	63033	69884
2014-10-20 15:05:04.859	63484	68280	63030	69911
2014-10-20 15:05:04.865	63486	68274	63002	69935
2014-10-20 15:05:04.869	63473	68269	63012	69966
2014-10-20 15:05:04.875	63476	68274	63016	69981
2014-10-20 15:05:04.880	63474	68278	62989	69966
2014-10-20 15:05:04.884	63475	68274	62978	69945
2014-10-20 15:05:04.890	63483	68282	62997	69916
2014-10-20 15:05:04.894	63475	68288	63012	69904
2014-10-20 15:05:04.900	63485	68268	63015	69920
2014-10-20 15:05:04.904	63485	68276	63037	69959
2014-10-20 15:05:04.910	63479	68287	63055	69985
2014-10-20 15:05:04.914	63490	68267	63068	70000
2014-10-20 15:05:04.920	63487	68276	63076	70021
2014-10-20 15:05:04.924	63484	68286	63039	70038
2014-10-20 15:05:04.930	63490	68291	63015	70042
2014-10-20 15:05:04.934	63496	68296	63016	70030
2014-10-20 15:05:04.940	63491	68287	63004	70038
2014-10-20 15:05:04.944	63487	68286	63008	70042
2014-10-20 15:05:04.950	63496	68287	63017	70011
2014-10-20 15:05:04.954	63491	68287	63027	69989
2014-10-20 15:05:04.960	63483	68280	63042	69948
2014-10-20 15:05:04.964	63487	68282	63052	69902
2014-10-20 15:05:04.970	63502	68286	63065	69881
2014-10-20 15:05:04.974	63502	68286	63044	69862
2014-10-20 15:05:04.980	63488	68299	63025	69863
2014-10-20 15:05:04.984	63503	68305	63030	69884
2014-10-20 15:05:04.990	63490	68287	63005	69917
2014-10-20 15:05:04.994	63478	68278	62997	69945
2014-10-20 15:05:05.000	63498	68280	63022	69950
2014-10-20 15:05:05.005	63483	68283	63032	69960
2014-10-20 15:05:05.009	63472	68293	63032	69998
2014-10-20 15:05:05.015	63490	68285	63024	70037
2014-10-20 15:05:05.019	63501	68295	63041	70061
2014-10-20 15:05:05.025	63498	68300	63061	70079
2014-10-20 15:05:05.029	63480	68275	63050	70077
2014-10-20 15:05:05.035	63496	68296	63045	70069
2014-10-20 15:05:05.039	63500	68289	63031	70049
2014-10-20 15:05:05.045	63486	68269	63012	70005
2014-10-20 15:05:05.049	63495	68290	63006	69974
2014-10-20 15:05:05.055	63485	68282	62990	69954
2014-10-20 15:05:05.059	63494	68281	62995	69935
2014-10-20 15:05:05.065	63508	68290	63013	69905
2014-10-20 15:05:05.069	63486	68282	63013	69880
2014-10-20 15:05:05.075	63489	68291	63025	69891
2014-10-20 15:05:05.079	63507	68285	63023	69913
2014-10-20 15:05:05.085	63501	68284	63025	69935
2014-10-20 15:05:05.089	63491	68294	63058	69962
2014-10-20 15:05:05.095	63505	68282	63059	69973
2014-10-20 15:05:05.099	63504	68295	63045	69982
2014-10-20 15:05:05.105	63482	68303	63042	70006
2014-10-20 15:05:05.109	63483	68287	63040	70020
2014-10-20 15:05:05.115	63498	68292	63053	70035
2014-10-20 15:05:05.119	63503	68285	63053	70062
2014-10-20 15:05:05.125	63498	68288	63031	70067
2014-10-20 15:05:05.130	63495	68300	63024	70039
2014-10-20 15:05:05.134	63503	68284	63017	70001
2014-10-20 15:05:05.140	63507	68288	62995	69973
2014-10-20 15:05:05.144	63501	68295	62987	69978
2014-10-20 15:05:05.150	63507	68296	63001	69988
2014-10-20 15:05:05.154	63509	68312	63011	69979
2014-10-20 15:05:05.160	63500	68298	63023	69985
2014-10-20 15:05:05.164	63521	68284	63039	69983
2014-10-20 15:05:05.170	63526	68300	63044	69946
2014-10-20 15:05:05.174	63513	68304	63062	69905
2014-10-20 15:05:05.180	63518	68309	63070	69883
2014-10-20 15:05:05.184	63508	68306	63056	69910
2014-10-20 15:05:05.190	63510	68294	63058	69938
2014-10-20 15:05:05.194	63507	68300	63050	69962
2014-10-20 15:05:05.200	63496	68312	63040	70005
2014-10-20 15:05:05.204	63508	68299	63030	70024
2014-10-20 15:05:05.210	63516	68290	63022	70018
2014-10-20 15:05:05.214	63518	68304	63023	70013
2014-10-20 15:05:05.220	63504	68299	63011	70041
2014-10-20 15:05:05.224	63505	68307	63027	70078
2014-10-20 15:05:05.230	63512	68305	63039	70081
2014-10-20 15:05:05.234	63505	68303	63012	70063
2014-10-20 15:05:05.240	63520	68316	63008	70041
2014-10-20 15:05:05.244	63521	68294	63008	70008
2014-10-20 15:05:05.250	63509	68294	63019	69981
2014-10-20 15:05:05.255	63519	68304	63055	69988
2014-10-20 15:05:05.259	63530	68294	63063	69986
2014-10-20 15:05:05.265	63520	68307	63061	69977
2014-10-20 15:05:05.269	63493	68317	63064	69973
2014-10-20 15:05:05.275	63508	68301	63058	69930
2014-10-20 15:05:05.279	63529	68297	63044	69886
2014-10-20 15:05:05.285	63508	68317	63028	69869
2014-10-20 15:05:05.289	63518	68310	63029	69890
2014-10-20 15:05:05.295	63529	68301	63035	69939
2014-10-20 15:05:05.299	63528	68310	63027	70012
2014-10-20 15:05:05.305	63525	68309	63030	70102
2014-10-20 15:05:05.309	63509	68309	63040	70124
2014-10-20 15:05:05.315	63508	68311	63054	70096
2014-10-20 15:05:05.319	63510	68317	63081	70079
2014-10-20 15:05:05.325	63531	68317	63090	70043
2014-10-20 15:05:05.329	63521	68302	63095	70027
2014-10-20 15:05:05.335	63499	68314	63101	70041
2014-10-20 15:05:05.339	63529	68323	63089	70053
2014-10-20 15:05:05.345	63523	68313	63086	70056
2014-10-20 15:05:05.349	63506	68320	63100	70031
2014-10-20 15:05:05.355	63511	68319	63092	69978
2014-10-20 15:05:05.359	63537	68334	63059	69919
2014-10-20 15:05:05.365	63554	68336	63031	69886
2014-10-20 15:05:05.369	63517	68312	63006	69889
2014-10-20 15:05:05.375	63521	68345	63008	69895
2014-10-20 15:05:05.380	63528	68331	63024	69928
2014-10-20 15:05:05.384	63513	68295	63039	69980
2014-10-20 15:05:05.390	63539	68334	63059	69999
2014-10-20 15:05:05.394	63539	68337	63052	70018
2014-10-20 15:05:05.400	63531	68325	63048	70038
2014-10-20 15:05:05.404	63531	68326	63043	70042
2014-10-20 15:05:05.410	63539	68323	63040	70088
2014-10-20 15:05:05.414	63547	68325	63065	70116
2014-10-20 15:05:05.420	63518	68310	63065	70093
2014-10-20 15:05:05.424	63528	68315	63057	70083
2014-10-20 15:05:05.430	63542	68325	63053	70050
2014-10-20 15:05:05.434	63531	68317	63030	70024
2014-10-20 15:05:05.440	63538	68336	63026	70033
2014-10-20 15:05:05.444	63536	68331	63043	70020
2014-10-20 15:05:05.450	63542	68311	63067	69995
2014-10-20 15:05:05.454	63542	68338	63087	69979
2014-10-20 15:05:05.460	63539	68335	63098	69961
2014-10-20 15:05:05.464	63540	68326	63088	69925
2014-10-20 15:05:05.470	63544	68342	63060	69888
2014-10-20 15:05:05.474	63557	68329	63043	69909
2014-10-20 15:05:05.480	63548	68327	63041	69951
2014-10-20 15:05:05.484	63541	68331	63062	70006
2014-10-20 15:05:05.490	63537	68321	63087	70075
2014-10-20 15:05:05.494	63538	68328	63082	70082
2014-10-20 15:05:05.500	63537	68329	63077	70064
2014-10-20 15:05:05.505	63539	68318	63075	70048
2014-10-20 15:05:05.509	63560	68329	63058	70037
2014-10-20 15:05:05.515	63534	68330	63065	70060
2014-10-20 15:05:05.519	63524	68322	63074	70062
2014-10-20 15:05:05.525	63536	68338	63051	70063
2014-10-20 15:05:05.529	63522	68327	63046	70062
2014-10-20 15:05:05.535	63540	68328	63059	70017
2014-10-20 15:05:05.539	63547	68335	63047	69980
2014-10-20 15:05:05.545	63546	68316	63037	69958
2014-10-20 15:05:05.549	63542	68337	63055	69971
2014-10-20 15:05:05.555	63529	68339	63066	70014
2014-10-20 15:05:05.559	63547	68323	63064	70026
2014-10-20 15:05:05.565	63548	68344	63073	70018
2014-10-20 15:05:05.569	63551	68347	63070	69997
2014-10-20 15:05:05.575	63552	68329	63056	69971
2014-10-20 15:05:05.579	63543	68335	63064	69983
2014-10-20 15:05:05.585	63557	68350	63074	69978
2014-10-20 15:05:05.589	63547	68333	63077	69980
2014-10-20 15:05:05.595	63549	68334	63079	70029
2014-10-20 15:05:05.599	63565	68350	63084	70059
2014-10-20 15:05:05.605	63554	68343	63090	70069
2014-10-20 15:05:05.609	63555	68337	63087	70050
2014-10-20 15:05:05.615	63551	68325	63089	70040
2014-10-20 15:05:05.619	63543	68330	63094	70068
2014-10-20 15:05:05.625	63544	68331	63084	70057
2014-10-20 15:05:05.630	63551	68339	63077	70024
2014-10-20 15:05:05.634	63552	68350	63072	70036
2014-10-20 15:05:05.640	63543	68329	63065	70055
2014-10-20 15:05:05.644	63543	68342	63070	70041
2014-10-20 15:05:05.650	63538	68335	63094	70043
2014-10-20 15:05:05.654	63533	68331	63114	70058
2014-10-20 15:05:05.660	63551	68355	63104	70049
2014-10-20 15:05:05.664	63554	68334	63082	70037
2014-10-20 15:05:05.670	63538	68342	63051	70015
2014-10-20 15:05:05.674	63542	68337	63034	69989
2014-10-20 15:05:05.680	63558	68332	63051	69977
2014-10-20 15:05:05.684	63544	68360	63058	69970
2014-10-20 15:05:05.690	63547	68350	63071	69980
2014-10-20 15:05:05.694	63561	68352	63095	69998
2014-10-20 15:05:05.700	63546	68339	63103	70001
2014-10-20 15:05:05.704	63556	68321	63100	70000
2014-10-20 15:05:05.710	63568	68340	63098	70017
2014-10-20 15:05:05.714	63556	68331	63113	70037
2014-10-20 15:05:05.720	63554	68330	63116	70056
2014-10-20 15:05:05.724	63562	68335	63115	70078
2014-10-20 15:05:05.730	63556	68330	63130	70088
2014-10-20 15:05:05.734	63538	68340	63105	70091
2014-10-20 15:05:05.740	63551	68334	63070	70095
2014-10-20 15:05:05.744	63575	68331	63067	70086
2014-10-20 15:05:05.750	63563	68349	63072	70068
2014-10-20 15:05:05.755	63550	68345	63079	70062
2014-10-20 15:05:05.759	63561	68333	63090	70048
2014-10-20 15:05:05.765	63561	68341	63083	70036
2014-10-20 15:05:05.769	63565	68341	63076	70033
2014-10-20 15:05:05.775	63563	68346	63082	70018
2014-10-20 15:05:05.779	63548	68344	63079	69986
2014-10-20 15:05:05.785	63556	68321	63080	69957
2014-10-20 15:05:05.789	63560	68333	63105	69952
2014-10-20 15:05:05.795	63549	68355	63132	69953
2014-10-20 15:05:05.799	63559	68356	63124	69985
2014-10-20 15:05:05.805	63575	68353	63108	70034
2014-10-20 15:05:05.809	63566	68344	63097	70043
2014-10-20 15:05:05.815	63549	68345	63081	70030
2014-10-20 15:05:05.819	63564	68341	63082	70004
2014-10-20 15:05:05.825	63578	68340	63078	70002
2014-10-20 15:05:05.829	63551	68345	63067	70014
2014-10-20 15:05:05.835	63542	68337	63065	70049
2014-10-20 15:05:05.839	63564	68342	63061	70103
2014-10-20 15:05:05.845	63565	68355	63071	70114
2014-10-20 15:05:05.849	63563	68354	63056	70120
2014-10-20 15:05:05.855	63567	68349	63035	70103
2014-10-20 15:05:05.859	63569	68344	63048	70082
2014-10-20 15:05:05.865	63566	68329	63065	70065
2014-10-20 15:05:05.869	63562	68337	63087	70055
2014-10-20 15:05:05.875	63571	68361	63103	70075
2014-10-20 15:05:05.880	63565	68354	63084	70053
2014-10-20 15:05:05.884	63564	68345	63070	70029
2014-10-20 15:05:05.890	63568	68330	63082	70005
2014-10-20 15:05:05.894	63563	68335	63095	69984
2014-10-20 15:05:05.900	63558	68359	63105	69986
2014-10-20 15:05:05.904	63549	68341	63108	69979
2014-10-20 15:05:05.910	63563	68352	63097	70004
2014-10-20 15:05:05.914	63580	68363	63105	70004
2014-10-20 15:05:05.920	63570	68346	63112	69993
2014-10-20 15:05:05.924	63559	68366	63103	70003
2014-10-20 15:05:05.930	63567	68354	63080	70006
2014-10-20 15:05:05.934	63571	68339	63059	70023
2014-10-20 15:05:05.940	63559	68360	63073	70072
2014-10-20 15:05:05.944	63569	68349	63073	70146
2014-10-20 15:05:05.950	63582	68339	63073	70152
2014-10-20 15:05:05.954	63568	68352	63092	70088
2014-10-20 15:05:05.960	63559	68363	63103	70036
2014-10-20 15:05:05.964	63564	68351	63119	70007
2014-10-20 15:05:05.970	63577	68330	63139	70009
2014-10-20 15:05:05.974	63567	68360	63151	70058
2014-10-20 15:05:05.980	63553	68367	63130	70124
2014-10-20 15:05:05.984	63570	68329	63120	70124
2014-10-20 15:05:05.990	63582	68355	63130	70060
2014-10-20 15:05:05.994	63578	68363	63116	69990
2014-10-20 15:05:06.000	63567	68336	63111	69948
2014-10-20 15:05:06.005	63568	68365	63111	69947
2014-10-20 15:05:06.009	63570	68365	63106	69970
2014-10-20 15:05:06.015	63566	68352	63100	69991
2014-10-20 15:05:06.019	63574	68360	63101	70012
2014-10-20 15:05:06.025	63575	68343	63102	70030
2014-10-20 15:05:06.029	63577	68362	63093	70030
2014-10-20 15:05:06.035	63576	68370	63092	70032
2014-10-20 15:05:06.039	63569	68338	63088	70034
2014-10-20 15:05:06.045	63570	68364	63091	70053
2014-10-20 15:05:06.049	63578	68368	63091	70117
2014-10-20 15:05:06.055	63588	68344	63080	70155
2014-10-20 15:05:06.059	63587	68371	63081	70141
2014-10-20 15:05:06.065	63577	68353	63093	70117
2014-10-20 15:05:06.069	63570	68332	63105	70080
2014-10-20 15:05:06.075	63578	68358	63108	70050
2014-10-20 15:05:06.079	63577	68350	63106	70039
2014-10-20 15:05:06.085	63554	68352	63107	70038
2014-10-20 15:05:06.089	63554	68362	63115	70026
2014-10-20 15:05:06.095	63569	68344	63128	69995
2014-10-20 15:05:06.099	63569	68358	63129	69982
2014-10-20 15:05:06.105	63557	68355	63103	69971
2014-10-20 15:05:06.109	63549	68352	63087	69988
2014-10-20 15:05:06.115	63570	68373	63090	70006
2014-10-20 15:05:06.119	63572	68359	63055	70001
2014-10-20 15:05:06.125	63553	68353	63037	70046
2014-10-20 15:05:06.130	63563	68358	63041	70094
2014-10-20 15:05:06.134	63572	68359	63048	70104
2014-10-20 15:05:06.140	63567	68367	63082	70081
2014-10-20 15:05:06.144	63560	68356	63092	70064
2014-10-20 15:05:06.150	63572	68362	63086	70071
2014-10-20 15:05:06.154	63568	68370	63084	70072
2014-10-20 15:05:06.160	63554	68353	63088	70098
2014-10-20 15:05:06.164	63561	68355	63083	70104
2014-10-20 15:05:06.170	63567	68364	63083	70094
2014-10-20 15:05:06.174	63574	68356	63113	70074
2014-10-20 15:05:06.180	63574	68347	63136	70033
2014-10-20 15:05:06.184	63570	68362	63144	70016
2014-10-20 15:05:06.190	63571	68366	63132	70022
2014-10-20 15:05:06.194	63580	68342	63121	70036
2014-10-20 15:05:06.200	63571	68352	63118	70036
2014-10-20 15:05:06.204	63555	68366	63116	70037
2014-10-20 15:05:06.210	63584	68366	63121	70017
2014-10-20 15:05:06.214	63592	68360	63124	70000
2014-10-20 15:05:06.220	63576	68373	63120	70024
2014-10-20 15:05:06.224	63573	68383	63104	70024
2014-10-20 15:05:06.230	63576	68347	63098	70057
2014-10-20 15:05:06.234	63587	68348	63107	70100
2014-10-20 15:05:06.240	63574	68363	63113	70111
2014-10-20 15:05:06.244	63572	68365	63122	70104
2014-10-20 15:05:06.250	63581	68372	63132	70083
2014-10-20 15:05:06.255	63565	68362	63129	70115
2014-10-20 15:05:06.259	63560	68368	63138	70130
2014-10-20 15:05:06.265	63564	68373	63145	70119
2014-10-20 15:05:06.269	63583	68369	63153	70099
2014-10-20 15:05:06.275	63571	68368	63177	70033
2014-10-20 15:05:06.279	63558	68355	63167	69989
2014-10-20 15:05:06.285	63592	68357	63156	69957
2014-10-20 15:05:06.289	63590	68366	63154	69940
2014-10-20 15:05:06.295	63568	68374	63118	69953
2014-10-20 15:05:06.299	63574	68364	63100	69986
2014-10-20 15:05:06.305	63596	68347	63111	70030
2014-10-20 15:05:06.309	63577	68369	63117	70061
2014-10-20 15:05:06.315	63567	68356	63108	70099
2014-10-20 15:05:06.319	63600	68339	63100	70127
2014-10-20 15:05:06.325	63578	68371	63110	70112
2014-10-20 15:05:06.329	63573	68360	63108	70096
2014-10-20 15:05:06.335	63598	68361	63098	70091
2014-10-20 15:05:06.339	63589	68378	63104	70070
2014-10-20 15:05:06.345	63587	68365	63111	70061
2014-10-20 15:05:06.349	63589	68368	63112	70063
2014-10-20 15:05:06.355	63596	68364	63107	70066
2014-10-20 15:05:06.359	63586	68368	63085	70072
2014-10-20 15:05:06.365	63567	68373	63075	70101
2014-10-20 15:05:06.369	63580	68361	63072	70149
2014-10-20 15:05:06.375	63584	68372	63072	70132
2014-10-20 15:05:06.380	63586	68369	63091	70080
2014-10-20 15:05:06.384	63585	68362	63086	70040
2014-10-20 15:05:06.390	63578	68379	63085	69986
2014-10-20 15:05:06.394	63583	68374	63096	69983
2014-10-20 15:05:06.400	63585	68363	63087	70026
2014-10-20 15:05:06.404	63596	68370	63096	70056
2014-10-20 15:05:06.410	63592	68382	63118	70072
2014-10-20 15:05:06.414	63579	68387	63137	70074
2014-10-20 15:05:06.420	63599	68379	63151	70056
2014-10-20 15:05:06.424	63597	68362	63144	70041
2014-10-20 15:05:06.430	63584	68368	63136	70043
2014-10-20 15:05:06.434	63606	68383	63129	70045
2014-10-20 15:05:06.440	63602	68373	63129	70084
2014-10-20 15:05:06.444	63585	68378	63139	70132
2014-10-20 15:05:06.450	63593	68375	63144	70137
2014-10-20 15:05:06.454	63602	68371	63148	70108
2014-10-20 15:05:06.460	63605	68380	63138	70076
2014-10-20 15:05:06.464	63601	68356	63131	70065
2014-10-20 15:05:06.470	63594	68371	63131	70063
2014-10-20 15:05:06.474	63599	68407	63131	70075
2014-10-20 15:05:06.480	63595	68369	63139	70087
2014-10-20 15:05:06.484	63605	68366	63141	70100
2014-10-20 15:05:06.490	63616	68390	63124	70096
2014-10-20 15:05:06.494	63602	68362	63101	70051
2014-10-20 15:05:06.500	63607	68374	63093	70023
2014-10-20 15:05:06.505	63602	68375	63098	69994
2014-10-20 15:05:06.509	63587	68352	63114	70004
2014-10-20 15:05:06.515	63599	68371	63144	70065
2014-10-20 15:05:06.519	63597	68374	63151	70089
2014-10-20 15:05:06.525	63589	68375	63145	70098
2014-10-20 15:05:06.529	63602	68357	63147	70090
2014-10-20 15:05:06.535	63614	68364	63124	70071
2014-10-20 15:05:06.539	63610	68394	63113	70079
2014-10-20 15:05:06.545	63589	68368	63130	70090
2014-10-20 15:05:06.549	63601	68379	63138	70119
2014-10-20 15:05:06.555	63619	68379	63144	70149
2014-10-20 15:05:06.559	63595	68381	63149	70140
2014-10-20 15:05:06.565	63596	68401	63156	70115
2014-10-20 15:05:06.569	63606	68366	63141	70107
2014-10-20 15:05:06.575	63599	68378	63121	70098
2014-10-20 15:05:06.579	63613	68388	63133	70054
2014-10-20 15:05:06.585	63604	68379	63144	70045
2014-10-20 15:05:06.589	63599	68398	63144	70062
2014-10-20 15:05:06.595	63610	68386	63141	70056
2014-10-20 15:05:06.599	63595	68388	63143	70069
2014-10-20 15:05:06.605	63596	68383	63158	70073
2014-10-20 15:05:06.609	63616	68365	63184	70068
2014-10-20 15:05:06.615	63614	68382	63178	70071
2014-10-20 15:05:06.619	63605	68379	63142	70061
2014-10-20 15:05:06.625	63609	68369	63139	70053
2014-10-20 15:05:06.630	63608	68386	63136	70045
2014-10-20 15:05:06.634	63607	68384	63127	70051
2014-10-20 15:05:06.640	63610	68368	63124	70075
2014-10-20 15:05:06.644	63606	68374	63105	70100
2014-10-20 15:05:06.650	63601	68376	63097	70137
2014-10-20 15:05:06.654	63599	68372	63101	70154
2014-10-20 15:05:06.660	63618	68386	63116	70166
2014-10-20 15:05:06.664	63614	68382	63115	70161
2014-10-20 15:05:06.670	63601	68389	63106	70121
2014-10-20 15:05:06.674	63622	68389	63122	70110
2014-10-20 15:05:06.680	63615	68370	63154	70097
2014-10-20 15:05:06.684	63602	68393	63182	70062
2014-10-20 15:05:06.690	63610	68374	63186	70055
2014-10-20 15:05:06.694	63605	68374	63183	70043
2014-10-20 15:05:06.700	63615	68400	63174	70028
2014-10-20 15:05:06.704	63619	68371	63165	70033
2014-10-20 15:05:06.710	63617	68393	63153	70031
2014-10-20 15:05:06.714	63616	68392	63139	70044
2014-10-20 15:05:06.720	63607	68370	63152	70069
2014-10-20 15:05:06.724	63625	68402	63150	70091
2014-10-20 15:05:06.730	63616	68393	63141	70106
2014-10-20 15:05:06.734	63604	68386	63148	70102
2014-10-20 15:05:06.740	63626	68399	63148	70091
2014-10-20 15:05:06.744	63602	68387	63165	70088
2014-10-20 15:05:06.750	63601	68385	63181	70091
2014-10-20 15:05:06.755	63630	68393	63182	70104
2014-10-20 15:05:06.759	63620	68392	63173	70143
2014-10-20 15:05:06.765	63614	68385	63160	70185
2014-10-20 15:05:06.769	63605	68387	63153	70177
2014-10-20 15:05:06.775	63612	68385	63145	70141
2014-10-20 15:05:06.779	63633	68383	63157	70107
2014-10-20 15:05:06.785	63622	68383	63167	70067
2014-10-20 15:05:06.789	63615	68390	63152	70057
2014-10-20 15:05:06.795	63629	68395	63155	70085
2014-10-20 15:05:06.799	63628	68386	63167	70094
2014-10-20 15:05:06.805	63624	68401	63157	70096
2014-10-20 15:05:06.809	63619	68396	63169	70072
2014-10-20 15:05:06.815	63616	68386	63190	70029
2014-10-20 15:05:06.819	63633	68399	63176	70024
2014-10-20 15:05:06.825	63624	68377	63170	70008
2014-10-20 15:05:06.829	63622	68379	63155	70002
2014-10-20 15:05:06.835	63632	68385	63128	70060
2014-10-20 15:05:06.839	63620	68383	63136	70105
2014-10-20 15:05:06.845	63628	68399	63158	70138
2014-10-20 15:05:06.849	63627	68366	63171	70157
2014-10-20 15:05:06.855	63618	68378	63178	70149
2014-10-20 15:05:06.859	63625	68402	63189	70161
2014-10-20 15:05:06.865	63629	68378	63214	70168
2014-10-20 15:05:06.869	63624	68383	63224	70153
2014-10-20 15:05:06.875	63618	68379	63222	70136
2014-10-20 15:05:06.880	63622	68389	63208	70112
2014-10-20 15:05:06.884	63624	68397	63201	70079
2014-10-20 15:05:06.890	63630	68372	63213	70085
2014-10-20 15:05:06.894	63628	68382	63208	70099
2014-10-20 15:05:06.900	63634	68389	63201	70084
2014-10-20 15:05:06.904	63637	68379	63202	70057
2014-10-20 15:05:06.910	63610	68387	63197	70033
2014-10-20 15:05:06.914	63609	68393	63185	70065
2014-10-20 15:05:06.920	63636	68391	63172	70101
2014-10-20 15:05:06.924	63630	68388	63156	70091
2014-10-20 15:05:06.930	63614	68384	63144	70091
2014-10-20 15:05:06.934	63637	68397	63141	70097
2014-10-20 15:05:06.940	63639	68392	63136	70089
2014-10-20 15:05:06.944	63618	68377	63144	70111
2014-10-20 15:05:06.950	63620	68399	63142	70147
2014-10-20 15:05:06.954	63632	68398	63147	70160
2014-10-20 15:05:06.960	63641	68382	63171	70163
2014-10-20 15:05:06.964	63622	68389	63178	70156
2014-10-20 15:05:06.970	63628	68390	63185	70161
2014-10-20 15:05:06.974	63640	68383	63173	70123
2014-10-20 15:05:06.980	63624	68386	63150	70071
2014-10-20 15:05:06.984	63618	68398	63135	70072
2014-10-20 15:05:06.990	63622	68390	63111	70041
2014-10-20 15:05:06.994	63641	68400	63109	70022
2014-10-20 15:05:07.000	63635	68419	63110	70047
2014-10-20 15:05:07.005	63626	68392	63133	70069
2014-10-20 15:05:07.009	63644	68388	63163	70085
2014-10-20 15:05:07.015	63633	68394	63166	70071
2014-10-20 15:05:07.019	63630	68380	63181	70106
2014-10-20 15:05:07.025	63642	68394	63177	70150
2014-10-20 15:05:07.029	63639	68390	63184	70161
2014-10-20 15:05:07.035	63631	68388	63196	70175
2014-10-20 15:05:07.039	63633	68405	63166	70151
2014-10-20 15:05:07.045	63634	68392	63149	70144
2014-10-20 15:05:07.049	63625	68394	63143	70132
2014-10-20 15:05:07.055	63630	68392	63130	70105
2014-10-20 15:05:07.059	63638	68378	63151	70100
2014-10-20 15:05:07.065	63638	68389	63183	70079
2014-10-20 15:05:07.069	63632	68387	63166	70072
2014-10-20 15:05:07.075	63623	68382	63175	70068
2014-10-20 15:05:07.079	63620	68394	63199	70054
2014-10-20 15:05:07.085	63627	68388	63178	70072
2014-10-20 15:05:07.089	63629	68375	63158	70104
2014-10-20 15:05:07.095	63632	68383	63155	70119
2014-10-20 15:05:07.099	63631	68394	63165	70119
2014-10-20 15:05:07.105	63626	68381	63169	70114
2014-10-20 15:05:07.109	63630	68379	63192	70072
2014-10-20 15:05:07.115	63627	68393	63214	70037
2014-10-20 15:05:07.119	63634	68385	63193	70055
2014-10-20 15:05:07.125	63636	68382	63192	70068
2014-10-20 15:05:07.130	63639	68388	63200	70106
2014-10-20 15:05:07.134	63640	68382	63212	70161
2014-10-20 15:05:07.140	63626	68386	63223	70177
2014-10-20 15:05:07.144	63629	68390	63196	70141
2014-10-20 15:05:07.150	63635	68383	63180	70108
2014-10-20 15:05:07.154	63633	68393	63164	70139
2014-10-20 15:05:07.160	63622	68398	63168	70160
2014-10-20 15:05:07.164	63632	68377	63206	70169
2014-10-20 15:05:07.170	63639	68391	63215	70165
2014-10-20 15:05:07.174	63616	68400	63217	70125
2014-10-20 15:05:07.180	63627	68379	63200	70097
2014-10-20 15:05:07.184	63630	68394	63184	70052
2014-10-20 15:05:07.190	63626	68396	63201	70027
2014-10-20 15:05:07.194	63618	68398	63189	70038
2014-10-20 15:05:07.200	63616	68413	63164	70049
2014-10-20 15:05:07.204	63635	68388	63170	70073
2014-10-20 15:05:07.210	63615	68393	63179	70075
2014-10-20 15:05:07.214	63618	68402	63166	70080
2014-10-20 15:05:07.220	63638	68376	63158	70085
2014-10-20 15:05:07.224	63633	68387	63171	70087
2014-10-20 15:05:07.230	63633	68392	63186	70142
2014-10-20 15:05:07.234	63621	68391	63207	70179
2014-10-20 15:05:07.240	63643	68404	63209	70182
2014-10-20 15:05:07.244	63633	68393	63183	70166
2014-10-20 15:05:07.250	63603	68400	63177	70125
2014-10-20 15:05:07.255	63638	68388	63157	70113
2014-10-20 15:05:07.259	63626	68370	63121	70102
2014-10-20 15:05:07.265	63611	68393	63117	70104
2014-10-20 15:05:07.269	63626	68388	63121	70118
2014-10-20 15:05:07.275	63625	68385	63128	70085
2014-10-20 15:05:07.279	63637	68382	63132	70062
2014-10-20 15:05:07.285	63616	68379	63138	70069
2014-10-20 15:05:07.289	63623	68393	63151	70068
2014-10-20 15:05:07.295	63641	68376	63161	70071
2014-10-20 15:05:07.299	63607	68381	63193	70101
2014-10-20 15:05:07.305	63617	68385	63203	70145
2014-10-20 15:05:07.309	63626	68372	63169	70145
2014-10-20 15:05:07.315	63609	68386	63156	70111
2014-10-20 15:05:07.319	63615	68374	63163	70083
2014-10-20 15:05:07.325	63623	68380	63187	70059
2014-10-20 15:05:07.329	63636	68396	63207	70066
2014-10-20 15:05:07.335	63627	68374	63209	70104
2014-10-20 15:05:07.339	63620	68381	63217	70133
2014-10-20 15:05:07.345	63629	68374	63211	70153
2014-10-20 15:05:07.349	63618	68360	63190	70163
2014-10-20 15:05:07.355	63619	68392	63182	70134
2014-10-20 15:05:07.359	63625	68390	63175	70097
2014-10-20 15:05:07.365	63632	68383	63157	70104
2014-10-20 15:05:07.369	63624	68391	63155	70116
2014-10-20 15:05:07.375	63609	68373	63174	70094
2014-10-20 15:05:07.380	63621	68388	63173	70096
2014-10-20 15:05:07.384	63633	68395	63167	70104
2014-10-20 15:05:07.390	63623	68386	63176	70080
2014-10-20 15:05:07.394	63609	68401	63167	70071
2014-10-20 15:05:07.400	63620	68393	63164	70085
2014-10-20 15:05:07.404	63623	68403	63178	70090
2014-10-20 15:05:07.410	63609	68396	63169	70087
2014-10-20 15:05:07.414	63615	68383	63145	70082
2014-10-20 15:05:07.420	63621	68402	63123	70085
2014-10-20 15:05:07.424	63613	68379	63116	70089
2014-10-20 15:05:07.430	63612	68373	63127	70099
2014-10-20 15:05:07.434	63615	68383	63140	70100
2014-10-20 15:05:07.440	63614	68372	63154	70087
2014-10-20 15:05:07.444	63609	68373	63161	70100
2014-10-20 15:05:07.450	63615	68375	63155	70111
2014-10-20 15:05:07.454	63616	68382	63141	70108
2014-10-20 15:05:07.460	63607	68374	63135	70105
2014-10-20 15:05:07.464	63612	68365	63143	70099
2014-10-20 15:05:07.470	63610	68383	63158	70114
2014-10-20 15:05:07.474	63608	68383	63158	70115
2014-10-20 15:05:07.480	63615	68370	63158	70096
2014-10-20 15:05:07.484	63615	68383	63167	70105
2014-10-20 15:05:07.490	63624	68393	63143	70104
2014-10-20 15:05:07.494	63605	68391	63130	70084
2014-10-20 15:05:07.500	63597	68392	63141	70074
2014-10-20 15:05:07.505	63621	68387	63136	70073
2014-10-20 15:05:07.509	63610	68379	63164	70083
2014-10-20 15:05:07.515	63615	68377	63182	70081
2014-10-20 15:05:07.519	63615	68387	63194	70079
2014-10-20 15:05:07.525	63602	68391	63219	70071
2014-10-20 15:05:07.529	63620	68375	63223	70070
2014-10-20 15:05:07.535	63616	68374	63246	70105
2014-10-20 15:05:07.539	63607	68379	63256	70098
2014-10-20 15:05:07.545	63605	68376	63223	70085
2014-10-20 15:05:07.549	63603	68383	63184	70094
2014-10-20 15:05:07.555	63612	68364	63167	70077
2014-10-20 15:05:07.559	63613	68362	63170	70088
2014-10-20 15:05:07.565	63606	68393	63159	70095
2014-10-20 15:05:07.569	63600	68386	63137	70069
2014-10-20 15:05:07.575	63604	68390	63130	70080
2014-10-20 15:05:07.579	63609	68382	63128	70114
2014-10-20 15:05:07.585	63605	68354	63104	70123
2014-10-20 15:05:07.589	63600	68377	63100	70116
2014-10-20 15:05:07.595	63599	68378	63106	70112
2014-10-20 15:05:07.599	63603	68368	63108	70085
2014-10-20 15:05:07.605	63596	68388	63124	70044
2014-10-20 15:05:07.609	63597	68380	63123	70043
2014-10-20 15:05:07.615	63606	68379	63139	70041
2014-10-20 15:05:07.619	63590	68378	63171	70027
2014-10-20 15:05:07.625	63592	68365	63179	70041
2014-10-20 15:05:07.630	63610	68364	63189	70062
2014-10-20 15:05:07.634	63594	68349	63188	70082
2014-10-20 15:05:07.640	63585	68371	63196	70100
2014-10-20 15:05:07.644	63600	68382	63210	70114
2014-10-20 15:05:07.650	63589	68358	63172	70128
2014-10-20 15:05:07.654	63586	68388	63141	70136
2014-10-20 15:05:07.660	63584	68380	63136	70137
2014-10-20 15:05:07.664	63588	68358	63121	70125
2014-10-20 15:05:07.670	63595	68380	63146	70099
2014-10-20 15:05:07.674	63581	68370	63178	70069
2014-10-20 15:05:07.680	63598	68365	63177	70025
2014-10-20 15:05:07.684	63602	68360	63157	70002
2014-10-20 15:05:07.690	63592	68361	63119	70007
2014-10-20 15:05:07.694	63588	68381	63102	70012
2014-10-20 15:05:07.700	63590	68362	63099	70047
2014-10-20 15:05:07.704	63600	68351	63094	70058
2014-10-20 15:05:07.710	63571	68374	63091	70056
2014-10-20 15:05:07.714	63571	68363	63093	70064
2014-10-20 15:05:07.720	63590	68353	63103	70056
2014-10-20 15:05:07.724	63598	68361	63104	70065
2014-10-20 15:05:07.730	63586	68354	63133	70070
2014-10-20 15:05:07.734	63567	68365	63154	70079
2014-10-20 15:05:07.740	63593	68376	63130	70067
2014-10-20 15:05:07.744	63585	68360	63130	70056
2014-10-20 15:05:07.750	63570	68352	63125	70077
2014-10-20 15:05:07.755	63596	68356	63090	70086
2014-10-20 15:05:07.759	63593	68360	63063	70125
2014-10-20 15:05:07.765	63576	68363	63054	70138
2014-10-20 15:05:07.769	63584	68362	63053	70140
2014-10-20 15:05:07.775	63588	68348	63067	70141
2014-10-20 15:05:07.779	63558	68356	63094	70086
2014-10-20 15:05:07.785	63554	68372	63101	70048
2014-10-20 15:05:07.789	63586	68358	63113	70010
2014-10-20 15:05:07.795	63591	68352	63141	69979
2014-10-20 15:05:07.799	63571	68358	63146	69974
2014-10-20 15:05:07.805	63568	68350	63151	69988
2014-10-20 15:05:07.809	63579	68353	63157	70029
2014-10-20 15:05:07.815	63580	68356	63159	70033
2014-10-20 15:05:07.819	63576	68343	63160	70046
2014-10-20 15:05:07.825	63578	68350	63124	70053
2014-10-20 15:05:07.829	63588	68356	63129	70034
2014-10-20 15:05:07.835	63572	68354	63160	70063
2014-10-20 15:05:07.839	63555	68352	63154	70075
2014-10-20 15:05:07.845	63571	68349	63176	70081
2014-10-20 15:05:07.849	63577	68350	63166	70104
2014-10-20 15:05:07.855	63566	68340	63126	70091
2014-10-20 15:05:07.859	63565	68342	63110	70087
2014-10-20 15:05:07.865	63573	68355	63084	70093
2014-10-20 15:05:07.869	63564	68353	63074	70082
2014-10-20 15:05:07.875	63555	68354	63072	70071
2014-10-20 15:05:07.880	63552	68362	63085	70066
2014-10-20 15:05:07.884	63560	68355	63115	70070
2014-10-20 15:05:07.890	63573	68339	63112	70058
2014-10-20 15:05:07.894	63570	68348	63097	70048
2014-10-20 15:05:07.900	63581	68353	63091	70036
2014-10-20 15:05:07.904	63567	68340	63085	69987
2014-10-20 15:05:07.910	63554	68355	63085	69953
2014-10-20 15:05:07.914	63569	68347	63097	69955
2014-10-20 15:05:07.920	63560	68332	63120	69955
2014-10-20 15:05:07.924	63561	68339	63116	69974
2014-10-20 15:05:07.930	63567	68336	63105	70037
2014-10-20 15:05:07.934	63561	68345	63117	70077
2014-10-20 15:05:07.940	63556	68349	63116	70072
2014-10-20 15:05:07.944	63545	68341	63102	70087
2014-10-20 15:05:07.950	63550	68343	63080	70089
2014-10-20 15:05:07.954	63563	68339	63066	70062
2014-10-20 15:05:07.960	63553	68333	63057	70062
2014-10-20 15:05:07.964	63549	68334	63044	70075
2014-10-20 15:05:07.970	63561	68333	63036	70073
2014-10-20 15:05:07.974	63556	68334	63035	70040
2014-10-20 15:05:07.980	63552	68324	63042	70016
2014-10-20 15:05:07.984	63559	68322	63060	70013
2014-10-20 15:05:07.990	63551	68334	63097	70007
2014-10-20 15:05:07.994	63541	68320	63127	70016
2014-10-20 15:05:08.000	63540	68323	63129	70004
2014-10-20 15:05:08.005	63543	68327	63118	70001
2014-10-20 15:05:08.009	63557	68311	63107	70006
2014-10-20 15:05:08.015	63539	68330	63110	69986
2014-10-20 15:05:08.019	63527	68331	63104	70004
2014-10-20 15:05:08.025	63555	68315	63096	70024
2014-10-20 15:05:08.029	63549	68327	63081	70036
2014-10-20 15:05:08.035	63539	68327	63073	70050
2014-10-20 15:05:08.039	63539	68311	63106	70041
2014-10-20 15:05:08.045	63541	68318	63130	70037
2014-10-20 15:05:08.049	63543	68329	63146	70036
2014-10-20 15:05:08.055	63533	68319	63151	70060
2014-10-20 15:05:08.059	63542	68324	63134	70084
2014-10-20 15:05:08.065	63542	68324	63107	70091
2014-10-20 15:05:08.069	63541	68305	63058	70114
2014-10-20 15:05:08.075	63546	68309	63037	70095
2014-10-20 15:05:08.079	63543	68323	63048	70050
2014-10-20 15:05:08.085	63536	68315	63067	70006
2014-10-20 15:05:08.089	63530	68310	63101	69946
2014-10-20 15:05:08.095	63536	68331	63093	69897
2014-10-20 15:05:08.099	63539	68329	63066	69881
2014-10-20 15:05:08.105	63541	68298	63061	69921
2014-10-20 15:05:08.109	63530	68301	63049	69961
2014-10-20 15:05:08.115	63510	68314	63032	69970
2014-10-20 15:05:08.119	63531	68296	63040	69984
2014-10-20 15:05:08.125	63553	68290	63070	69997
2014-10-20 15:05:08.130	63530	68318	63088	70035
2014-10-20 15:05:08.134	63517	68310	63092	70095
2014-10-20 15:05:08.140	63514	68293	63087	70118
2014-10-20 15:05:08.144	63509	68310	63079	70150
2014-10-20 15:05:08.150	63524	68302	63079	70158
2014-10-20 15:05:08.154	63520	68301	63069	70086
2014-10-20 15:05:08.160	63519	68313	63072	70032
2014-10-20 15:05:08.164	63516	68306	63099	69996
2014-10-20 15:05:08.170	63519	68311	63107	69958
2014-10-20 15:05:08.174	63529	68310	63097	69927
2014-10-20 15:05:08.180	63516	68314	63086	69913
2014-10-20 15:05:08.184	63521	68309	63059	69940
2014-10-20 15:05:08.190	63521	68305	63037	69953
2014-10-20 15:05:08.194	63523	68316	63028	69995
2014-10-20 15:05:08.200	63526	68308	63026	70036
2014-10-20 15:05:08.204	63506	68306	63037	70019
2014-10-20 15:05:08.210	63524	68308	63032	70034
2014-10-20 15:05:08.214	63532	68309	63036	70070
2014-10-20 15:05:08.220	63512	68314	63047	70064
2014-10-20 15:05:08.224	63518	68302	63038	70038
2014-10-20 15:05:08.230	63520	68295	63045	70017
2014-10-20 15:05:08.234	63513	68294	63040	69995
2014-10-20 15:05:08.240	63512	68308	63041	69994
2014-10-20 15:05:08.244	63514	68313	63065	70000
2014-10-20 15:05:08.250	63523	68295	63072	69991
2014-10-20 15:05:08.255	63513	68309	63102	69984
2014-10-20 15:05:08.259	63489	68307	63114	69978
2014-10-20 15:05:08.265	63509	68297	63099	69979
2014-10-20 15:05:08.269	63514	68311	63101	69968
2014-10-20 15:05:08.275	63499	68304	63078	69967
2014-10-20 15:05:08.279	63504	68301	63055	69956
2014-10-20 15:05:08.285	63501	68311	63040	69942
2014-10-20 15:05:08.289	63502	68311	63016	69979
2014-10-20 15:05:08.295	63501	68292	62994	70005
2014-10-20 15:05:08.299	63504	68270	62977	70017
2014-10-20 15:05:08.305	63511	68289	62983	70040
2014-10-20 15:05:08.309	63503	68293	62983	70032
2014-10-20 15:05:08.315	63503	68273	62976	70022
2014-10-20 15:05:08.319	63507	68294	62994	70013
2014-10-20 15:05:08.325	63505	68294	63019	70004
2014-10-20 15:05:08.329	63509	68295	63038	70027
2014-10-20 15:05:08.335	63509	68311	63049	70032
2014-10-20 15:05:08.339	63505	68286	63060	70013
2014-10-20 15:05:08.345	63502	68279	63067	70006
2014-10-20 15:05:08.349	63494	68280	63050	69996
2014-10-20 15:05:08.355	63497	68285	63045	69998
2014-10-20 15:05:08.359	63506	68313	63056	69988
2014-10-20 15:05:08.365	63507	68294	63046	69986
2014-10-20 15:05:08.369	63495	68265	63039	69986
2014-10-20 15:05:08.375	63497	68280	63024	69963
2014-10-20 15:05:08.380	63503	68281	63014	69951
2014-10-20 15:05:08.384	63490	68271	63022	69939
2014-10-20 15:05:08.390	63502	68277	63021	69933
2014-10-20 15:05:08.394	63492	68286	63030	69936
2014-10-20 15:05:08.400	63481	68285	63030	69953
2014-10-20 15:05:08.404	63495	68273	63038	69977
2014-10-20 15:05:08.410	63481	68281	63072	69972
2014-10-20 15:05:08.414	63479	68280	63076	69976
2014-10-20 15:05:08.420	63482	68262	63069	69986
2014-10-20 15:05:08.424	63480	68281	63067	69985
2014-10-20 15:05:08.430	63489	68286	63059	70018
2014-10-20 15:05:08.434	63486	68274	63049	70057
2014-10-20 15:05:08.440	63481	68279	63024	70064
2014-10-20 15:05:08.444	63489	68285	63014	70063
2014-10-20 15:05:08.450	63481	68271	63015	70028
2014-10-20 15:05:08.454	63476	68277	63023	69979
2014-10-20 15:05:08.460	63503	68294	63037	69962
2014-10-20 15:05:08.464	63494	68271	63033	69950
2014-10-20 15:05:08.470	63472	68284	63053	69946
2014-10-20 15:05:08.474	63491	68307	63063	69937
2014-10-20 15:05:08.480	63485	68282	63066	69934
2014-10-20 15:05:08.484	63474	68287	63090	69937
2014-10-20 15:05:08.490	63481	68280	63071	69927
2014-10-20 15:05:08.494	63489	68259	63059	69944
2014-10-20 15:05:08.500	63503	68270	63048	69959
2014-10-20 15:05:08.505	63487	68268	63005	69969
2014-10-20 15:05:08.509	63492	68276	62985	69995
2014-10-20 15:05:08.515	63498	68287	62962	69995
2014-10-20 15:05:08.519	63468	68271	62946	70012
2014-10-20 15:05:08.525	63471	68276	62969	70041
2014-10-20 15:05:08.529	63481	68282	62989	70024
2014-10-20 15:05:08.535	63483	68273	62981	70013
2014-10-20 15:05:08.539	63481	68275	62991	69994
2014-10-20 15:05:08.545	63478	68274	63007	69950
2014-10-20 15:05:08.549	63489	68272	63011	69933
2014-10-20 15:05:08.555	63484	68269	63040	69913
2014-10-20 15:05:08.559	63473	68262	63065	69912
2014-10-20 15:05:08.565	63487	68270	63066	69949
2014-10-20 15:05:08.569	63491	68280	63050	69967
2014-10-20 15:05:08.575	63478	68268	63030	69964
2014-10-20 15:05:08.579	63482	68272	63011	69946
2014-10-20 15:05:08.585	63487	68281	63010	69917
2014-10-20 15:05:08.589	63480	68256	63028	69893
2014-10-20 15:05:08.595	63474	68267	63007	69913
2014-10-20 15:05:08.599	63469	68288	62996	69963
2014-10-20 15:05:08.605	63476	68264	62998	70003
2014-10-20 15:05:08.609	63489	68266	62980	70032
2014-10-20 15:05:08.615	63482	68270	62980	70031
2014-10-20 15:05:08.619	63469	68277	62990	70045
2014-10-20 15:05:08.625	63469	68277	63009	70042
2014-10-20 15:05:08.630	63476	68261	63028	70031
2014-10-20 15:05:08.634	63471	68276	63024	70047
2014-10-20 15:05:08.640	63460	68272	63007	70006
2014-10-20 15:05:08.644	63466	68273	63001	69963
2014-10-20 15:05:08.650	63462	68270	63013	69920
2014-10-20 15:05:08.654	63453	68254	63018	69870
2014-10-20 15:05:08.660	63464	68272	63025	69872
2014-10-20 15:05:08.664	63470	68260	63049	69879
2014-10-20 15:05:08.670	63464	68242	63061	69888
2014-10-20 15:05:08.674	63459	68265	63035	69912
2014-10-20 15:05:08.680	63467	68262	62996	69926
2014-10-20 15:05:08.684	63470	68258	62954	69955
2014-10-20 15:05:08.690	63457	68263	62941	69982
2014-10-20 15:05:08.694	63464	68262	62952	69985
2014-10-20 15:05:08.700	63460	68275	62970	69984
2014-10-20 15:05:08.704	63458	68265	63000	69991
2014-10-20 15:05:08.710	63469	68258	62995	70010
2014-10-20 15:05:08.714	63453	68268	63004	69999
2014-10-20 15:05:08.720	63460	68257	63008	69983
2014-10-20 15:05:08.724	63459	68266	62982	69999
2014-10-20 15:05:08.730	63443	68275	62995	69965
2014-10-20 15:05:08.734	63465	68264	63003	69937
2014-10-20 15:05:08.740	63466	68256	63010	69929
2014-10-20 15:05:08.744	63460	68255	62994	69893
2014-10-20 15:05:08.750	63451	68266	62966	69887
2014-10-20 15:05:08.755	63463	68257	62973	69881
2014-10-20 15:05:08.759	63485	68247	62962	69885
2014-10-20 15:05:08.765	63450	68273	62971	69913
2014-10-20 15:05:08.769	63459	68267	62997	69925
2014-10-20 15:05:08.775	63477	68253	63007	69929
2014-10-20 15:05:08.779	63454	68268	63018	69905
2014-10-20 15:05:08.785	63461	68249	63007	69926
2014-10-20 15:05:08.789	63451	68244	63021	69989
2014-10-20 15:05:08.795	63454	68263	63048	70015
2014-10-20 15:05:08.799	63460	68247	63050	70046
2014-10-20 15:05:08.805	63456	68250	63078	70046
2014-10-20 15:05:08.809	63465	68263	63080	70013
2014-10-20 15:05:08.815	63456	68263	63029	69996
2014-10-20 15:05:08.819	63464	68266	62980	69984
2014-10-20 15:05:08.825	63463	68250	62955	69974
2014-10-20 15:05:08.829	63453	68247	62968	69970
2014-10-20 15:05:08.835	63457	68252	62972	69967
2014-10-20 15:05:08.839	63448	68256	62968	69924
2014-10-20 15:05:08.845	63463	68269	62984	69891
2014-10-20 15:05:08.849	63457	68254	62984	69881
2014-10-20 15:05:08.855	63447	68255	62985	69861
2014-10-20 15:05:08.859	63463	68266	63001	69871
2014-10-20 15:05:08.865	63454	68250	63029	69885
2014-10-20 15:05:08.869	63448	68241	63047	69893
2014-10-20 15:05:08.875	63453	68237	63040	69889
2014-10-20 15:05:08.880	63456	68249	63032	69892
2014-10-20 15:05:08.884	63453	68248	63016	69914
2014-10-20 15:05:08.890	63446	68242	62994	69946
2014-10-20 15:05:08.894	63440	68256	62997	70005
2014-10-20 15:05:08.900	63456	68253	63019	70019
2014-10-20 15:05:08.904	63459	68251	63016	70051
2014-10-20 15:05:08.910	63450	68253	62997	70080
2014-10-20 15:05:08.914	63476	68250	62994	70042
2014-10-20 15:05:08.920	63466	68257	62975	70023
2014-10-20 15:05:08.924	63448	68248	62950	70005
2014-10-20 15:05:08.930	63460	68250	62943	69996
2014-10-20 15:05:08.934	63465	68261	62954	69947
2014-10-20 15:05:08.940	63460	68241	62962	69882
2014-10-20 15:05:08.944	63449	68257	62940	69859
2014-10-20 15:05:08.950	63455	68263	62940	69824
2014-10-20 15:05:08.954	63450	68229	62972	69810
2014-10-20 15:05:08.960	63447	68254	62999	69821
2014-10-20 15:05:08.964	63455	68256	63020	69872
2014-10-20 15:05:08.970	63458	68240	63020	69925
2014-10-20 15:05:08.974	63462	68256	63024	69946
2014-10-20 15:05:08.980	63462	68245	63027	69991
2014-10-20 15:05:08.984	63460	68252	63000	70003
2014-10-20 15:05:08.990	63455	68254	62985	69983
2014-10-20 15:05:08.994	63456	68251	62981	69978
2014-10-20 15:05:09.000	63457	68262	63000	69996
2014-10-20 15:05:09.005	63449	68238	63034	69999
2014-10-20 15:05:09.009	63446	68236	63029	69998
2014-10-20 15:05:09.015	63449	68257	63021	70005
2014-10-20 15:05:09.019	63463	68243	63002	69954
2014-10-20 15:05:09.025	63448	68237	62969	69930
2014-10-20 15:05:09.029	63434	68259	62960	69921
2014-10-20 15:05:09.035	63463	68256	62945	69902
2014-10-20 15:05:09.039	63455	68242	62943	69916
2014-10-20 15:05:09.045	63436	68258	62948	69913
2014-10-20 15:05:09.049	63465	68259	62955	69946
2014-10-20 15:05:09.055	63467	68252	62963	69969
2014-10-20 15:05:09.059	63442	68251	62967	69948
2014-10-20 15:05:09.065	63456	68244	62996	69959
2014-10-20 15:05:09.069	63468	68247	63015	69966
2014-10-20 15:05:09.075	63448	68240	63014	69959
2014-10-20 15:05:09.079	63453	68237	63008	69947
2014-10-20 15:05:09.085	63464	68251	63003	69945
2014-10-20 15:05:09.089	63459	68251	63001	69924
2014-10-20 15:05:09.095	63460	68247	62964	69870
2014-10-20 15:05:09.099	63451	68255	62958	69863
2014-10-20 15:05:09.105	63456	68261	62995	69889
2014-10-20 15:05:09.109	63449	68258	62997	69905
2014-10-20 15:05:09.115	63449	68254	63013	69927
2014-10-20 15:05:09.119	63471	68245	63036	69955
2014-10-20 15:05:09.125	63459	68254	63042	69982
2014-10-20 15:05:09.130	63449	68260	63051	69999
2014-10-20 15:05:09.134	63455	68251	63050	70016
2014-10-20 15:05:09.140	63464	68255	63061	70031
2014-10-20 15:05:09.144	63464	68249	63048	70019
2014-10-20 15:05:09.150	63457	68247	63039	70005
2014-10-20 15:05:09.154	63463	68257	63058	69988
2014-10-20 15:05:09.160	63459	68247	63051	69969
2014-10-20 15:05:09.164	63461	68260	63063	69945
2014-10-20 15:05:09.170	63456	68264	63088	69915
2014-10-20 15:05:09.174	63453	68243	63073	69914
2014-10-20 15:05:09.180	63470	68270	63032	69901
2014-10-20 15:05:09.184	63464	68277	63003	69884
2014-10-20 15:05:09.190	63461	68265	62998	69903
2014-10-20 15:05:09.194	63454	68276	63012	69929
2014-10-20 15:05:09.200	63446	68264	63029	69941
2014-10-20 15:05:09.204	63466	68262	63037	69943
2014-10-20 15:05:09.210	63454	68260	63034	69965
2014-10-20 15:05:09.214	63450	68274	63008	69968
2014-10-20 15:05:09.220	63473	68274	62979	69955
2014-10-20 15:05:09.224	63465	68250	62964	69971
2014-10-20 15:05:09.230	63454	68273	62952	69976
2014-10-20 15:05:09.234	63456	68275	62950	69979
2014-10-20 15:05:09.240	63459	68264	62951	69979
2014-10-20 15:05:09.244	63463	68269	62955	69948
2014-10-20 15:05:09.250	63471	68268	62970	69927
2014-10-20 15:05:09.255	63469	68275	62982	69927
2014-10-20 15:05:09.259	63471	68273	63002	69931
2014-10-20 15:05:09.265	63475	68268	63021	69953
2014-10-20 15:05:09.269	63460	68254	63036	69972
2014-10-20 15:05:09.275	63468	68267	63059	69965
2014-10-20 15:05:09.279	63470	68274	63059	69975
2014-10-20 15:05:09.285	63463	68262	63038	69994
2014-10-20 15:05:09.289	63474	68284	63019	69972
2014-10-20 15:05:09.295	63471	68276	63018	69952
2014-10-20 15:05:09.299	63476	68278	63023	69962
2014-10-20 15:05:09.305	63476	68283	63023	69960
2014-10-20 15:05:09.309	63479	68262	63013	69939
2014-10-20 15:05:09.315	63480	68280	63012	69930
2014-10-20 15:05:09.319	63469	68279	63009	69933
2014-10-20 15:05:09.325	63485	68270	63000	69929
2014-10-20 15:05:09.329	63480	68269	63015	69947
2014-10-20 15:05:09.335	63462	68265	63006	69947
2014-10-20 15:05:09.339	63480	68286	62980	69939
2014-10-20 15:05:09.345	63478	68282	62986	69983
2014-10-20 15:05:09.349	63463	68264	62984	70015
2014-10-20 15:05:09.355	63487	68278	62970	70026
2014-10-20 15:05:09.359	63491	68268	62968	70042
2014-10-20 15:05:09.365	63471	68260	62962	70036
2014-10-20 15:05:09.369	63488	68280	62972	70018
2014-10-20 15:05:09.375	63485	68271	62990	69960
2014-10-20 15:05:09.380	63477	68261	63011	69906
2014-10-20 15:05:09.384	63483	68263	63029	69894
2014-10-20 15:05:09.390	63494	68281	63023	69895
2014-10-20 15:05:09.394	63508	68277	63044	69930
2014-10-20 15:05:09.400	63499	68250	63067	69956
2014-10-20 15:05:09.404	63502	68277	63074	69960
2014-10-20 15:05:09.410	63497	68277	63098	69971
2014-10-20 15:05:09.414	63501	68266	63100	69975
2014-10-20 15:05:09.420	63500	68283	63101	69995
2014-10-20 15:05:09.424	63487	68275	63094	70016
2014-10-20 15:05:09.430	63499	68278	63072	70014
2014-10-20 15:05:09.434	63487	68276	63073	70004
2014-10-20 15:05:09.440	63496	68282	63058	70006
2014-10-20 15:05:09.444	63514	68287	63048	69968
2014-10-20 15:05:09.450	63502	68284	63040	69936
2014-10-20 15:05:09.454	63508	68295	63026	69957
2014-10-20 15:05:09.460	63509	68296	63050	69959
2014-10-20 15:05:09.464	63510	68301	63048	69976
2014-10-20 15:05:09.470	63509	68297	63041	70011
2014-10-20 15:05:09.474	63507	68295	63065	70012
2014-10-20 15:05:09.480	63509	68301	63070	69991
2014-10-20 15:05:09.484	63495	68281	63087	69984
2014-10-20 15:05:09.490	63501	68283	63086	69981
2014-10-20 15:05:09.494	63520	68299	63066	69972
2014-10-20 15:05:09.500	63514	68293	63070	69988
2014-10-20 15:05:09.505	63509	68287	63052	69997
2014-10-20 15:05:09.509	63525	68295	63050	70004
2014-10-20 15:05:09.515	63515	68297	63061	70025
2014-10-20 15:05:09.519	63508	68288	63024	70018
2014-10-20 15:05:09.525	63519	68285	63003	69996
2014-10-20 15:05:09.529	63527	68285	63004	69984
2014-10-20 15:05:09.535	63533	68301	63009	69975
2014-10-20 15:05:09.539	63522	68295	63040	69967
2014-10-20 15:05:09.545	63526	68278	63067	69971
2014-10-20 15:05:09.549	63515	68300	63094	69995
2014-10-20 15:05:09.555	63514	68308	63118	70038
2014-10-20 15:05:09.559	63542	68295	63107	70053
2014-10-20 15:05:09.565	63516	68292	63083	70025
2014-10-20 15:05:09.569	63523	68299	63076	69989
2014-10-20 15:05:09.575	63542	68304	63079	69966
2014-10-20 15:05:09.579	63521	68290	63061	69955
2014-10-20 15:05:09.585	63531	68306	63049	69953
2014-10-20 15:05:09.589	63523	68325	63037	69996
2014-10-20 15:05:09.595	63528	68316	63007	70051
2014-10-20 15:05:09.599	63528	68319	63005	70083
2014-10-20 15:05:09.605	63518	68311	63007	70107
2014-10-20 15:05:09.609	63537	68316	63019	70105
2014-10-20 15:05:09.615	63529	68316	63056	70080
2014-10-20 15:05:09.619	63537	68294	63073	70050
2014-10-20 15:05:09.625	63537	68307	63087	70045
2014-10-20 15:05:09.630	63531	68311	63098	70023
2014-10-20 15:05:09.634	63542	68311	63098	69998
2014-10-20 15:05:09.640	63540	68318	63084	69998
2014-10-20 15:05:09.644	63554	68313	63096	69977
2014-10-20 15:05:09.650	63548	68321	63120	69951
2014-10-20 15:05:09.654	63540	68332	63098	69937
2014-10-20 15:05:09.660	63551	68328	63111	69951
2014-10-20 15:05:09.664	63544	68316	63135	69971
2014-10-20 15:05:09.670	63548	68326	63132	69996
2014-10-20 15:05:09.674	63553	68330	63152	70016
2014-10-20 15:05:09.680	63557	68333	63164	70031
2014-10-20 15:05:09.684	63564	68331	63166	70072
2014-10-20 15:05:09.690	63554	68315	63163	70085
2014-10-20 15:05:09.694	63565	68330	63150	70108
2014-10-20 15:05:09.700	63567	68325	63156	70110
2014-10-20 15:05:09.704	63561	68318	63150	70114
2014-10-20 15:05:09.710	63561	68325	63107	70142
2014-10-20 15:05:09.714	63545	68321	63070	70110
2014-10-20 15:05:09.720	63565	68332	63054	70067
2014-10-20 15:05:09.724	63571	68322	63048	70010
2014-10-20 15:05:09.730	63560	68324	63050	69982
2014-10-20 15:05:09.734	63576	68334	63060	69995
2014-10-20 15:05:09.740	63564	68333	63068	69983
2014-10-20 15:05:09.744	63551	68343	63059	69999
2014-10-20 15:05:09.750	63571	68338	63060	70003
2014-10-20 15:05:09.755	63586	68343	63087	69991
2014-10-20 15:05:09.759	63570	68348	63098	69983
2014-10-20 15:05:09.765	63562	68336	63103	69966
2014-10-20 15:05:09.769	63569	68343	63098	69997
2014-10-20 15:05:09.775	63565	68352	63069	70041
2014-10-20 15:05:09.779	63573	68342	63056	70082
2014-10-20 15:05:09.785	63577	68343	63063	70112
2014-10-20 15:05:09.789	63581	68356	63072	70114
2014-10-20 15:05:09.795	63597	68351	63094	70092
2014-10-20 15:05:09.799	63582	68349	63120	70052
2014-10-20 15:05:09.805	63568	68356	63118	70061
2014-10-20 15:05:09.809	63577	68354	63114	70104
2014-10-20 15:05:09.815	63585	68350	63126	70143
2014-10-20 15:05:09.819	63591	68359	63136	70160
2014-10-20 15:05:09.825	63581	68350	63152	70141
2014-10-20 15:05:09.829	63589	68342	63177	70129
2014-10-20 15:05:09.835	63588	68355	63190	70097
2014-10-20 15:05:09.839	63580	68360	63187	70061
2014-10-20 15:05:09.845	63604	68373	63195	70024
2014-10-20 15:05:09.849	63600	68366	63199	69993
2014-10-20 15:05:09.855	63594	68353	63182	70011
2014-10-20 15:05:09.859	63599	68363	63130	69987
2014-10-20 15:05:09.865	63588	68357	63083	69949
2014-10-20 15:05:09.869	63583	68360	63086	69960
2014-10-20 15:05:09.875	63588	68368	63085	69970
2014-10-20 15:05:09.880	63599	68365	63100	69987
2014-10-20 15:05:09.884	63613	68374	63131	70025
2014-10-20 15:05:09.890	63610	68376	63136	70084
2014-10-20 15:05:09.894	63594	68362	63161	70146
2014-10-20 15:05:09.900	63595	68375	63157	70197
2014-10-20 15:05:09.904	63598	68384	63120	70221
2014-10-20 15:05:09.910	63601	68375	63125	70200
2014-10-20 15:05:09.914	63606	68377	63130	70166
2014-10-20 15:05:09.920	63605	68381	63135	70129
2014-10-20 15:05:09.924	63599	68387	63139	70103
2014-10-20 15:05:09.930	63595	68392	63113	70114
2014-10-20 15:05:09.934	63604	68390	63106	70116
2014-10-20 15:05:09.940	63601	68370	63119	70088
2014-10-20 15:05:09.944	63603	68385	63128	70058
2014-10-20 15:05:09.950	63610	68401	63144	70023
2014-10-20 15:05:09.954	63618	68379	63152	69984
2014-10-20 15:05:09.960	63625	68403	63165	69987
2014-10-20 15:05:09.964	63606	68399	63176	70015
2014-10-20 15:05:09.970	63616	68376	63182	70026
2014-10-20 15:05:09.974	63622	68400	63175	70038
2014-10-20 15:05:09.980	63613	68399	63158	70045
2014-10-20 15:05:09.984	63614	68392	63153	70055
2014-10-20 15:05:09.990	63605	68402	63133	70072
2014-10-20 15:05:09.994	63624	68398	63128	70098
2014-10-20 15:05:10.000	63616	68383	63151	70152
2014-10-20 15:05:10.005	63595	68395	63142	70202
2014-10-20 15:05:10.009	63634	68400	63137	70227
2014-10-20 15:05:10.015	63637	68391	63167	70218
2014-10-20 15:05:10.019	63603	68400	63190	70182
2014-10-20 15:05:10.025	63622	68397	63198	70130
2014-10-20 15:05:10.029	63636	68397	63187	70078
2014-10-20 15:05:10.035	63618	68394	63153	70064
2014-10-20 15:05:10.039	63626	68393	63129	70059
2014-10-20 15:05:10.045	63640	68407	63121	70063
2014-10-20 15:05:10.049	63628	68396	63125	70063
2014-10-20 15:05:10.055	63622	68390	63134	70042
2014-10-20 15:05:10.059	63626	68406	63129	70060
2014-10-20 15:05:10.065	63644	68412	63129	70063
2014-10-20 15:05:10.069	63638	68410	63136	70079
2014-10-20 15:05:10.075	63615	68415	63163	70116
2014-10-20 15:05:10.079	63645	68416	63189	70093
2014-10-20 15:05:10.085	63644	68416	63179	70096
2014-10-20 15:05:10.089	63626	68424	63190	70115
2014-10-20 15:05:10.095	63660	68415	63229	70136
2014-10-20 15:05:10.099	63657	68411	63252	70168
2014-10-20 15:05:10.105	63637	68421	63242	70187
2014-10-20 15:05:10.109	63641	68414	63213	70206
2014-10-20 15:05:10.115	63643	68406	63209	70170
2014-10-20 15:05:10.119	63638	68416	63184	70132
2014-10-20 15:05:10.125	63641	68429	63160	70112
2014-10-20 15:05:10.130	63649	68431	63170	70085
2014-10-20 15:05:10.134	63642	68427	63147	70078
2014-10-20 15:05:10.140	63644	68413	63132	70056
2014-10-20 15:05:10.144	63656	68421	63133	70080
2014-10-20 15:05:10.150	63646	68428	63106	70102
2014-10-20 15:05:10.154	63641	68413	63108	70084
2014-10-20 15:05:10.160	63643	68427	63124	70112
2014-10-20 15:05:10.164	63643	68440	63150	70104
2014-10-20 15:05:10.170	63652	68418	63192	70109
2014-10-20 15:05:10.174	63644	68429	63199	70155
2014-10-20 15:05:10.180	63635	68445	63204	70176
2014-10-20 15:05:10.184	63652	68414	63222	70190
2014-10-20 15:05:10.190	63662	68419	63224	70158
2014-10-20 15:05:10.194	63667	68437	63234	70136
2014-10-20 15:05:10.200	63667	68419	63264	70135
2014-10-20 15:05:10.204	63655	68432	63272	70132
2014-10-20 15:05:10.210	63660	68440	63260	70146
2014-10-20 15:05:10.214	63666	68436	63260	70161
2014-10-20 15:05:10.220	63649	68447	63242	70172
2014-10-20 15:05:10.224	63648	68440	63220	70152
2014-10-20 15:05:10.230	63657	68434	63229	70118
2014-10-20 15:05:10.234	63659	68426	63234	70093
2014-10-20 15:05:10.240	63655	68426	63230	70080
2014-10-20 15:05:10.244	63651	68448	63223	70091
2014-10-20 15:05:10.250	63665	68445	63202	70107
2014-10-20 15:05:10.255	63664	68440	63179	70143
2014-10-20 15:05:10.259	63657	68445	63162	70145
2014-10-20 15:05:10.265	63663	68430	63159	70116
2014-10-20 15:05:10.269	63668	68430	63176	70112
2014-10-20 15:05:10.275	63668	68446	63193	70118
2014-10-20 15:05:10.279	63669	68450	63190	70130
2014-10-20 15:05:10.285	63670	68449	63203	70138
2014-10-20 15:05:10.289	63670	68435	63210	70166
2014-10-20 15:05:10.295	63672	68437	63202	70179
2014-10-20 15:05:10.299	63662	68457	63221	70173
2014-10-20 15:05:10.305	63661	68447	63234	70210
2014-10-20 15:05:10.309	63668	68436	63234	70204
2014-10-20 15:05:10.315	63666	68458	63223	70155
2014-10-20 15:05:10.319	63678	68459	63195	70148
2014-10-20 15:05:10.325	63670	68441	63190	70142
2014-10-20 15:05:10.329	63671	68438	63193	70119
2014-10-20 15:05:10.335	63669	68448	63204	70106
2014-10-20 15:05:10.339	63672	68458	63202	70097
2014-10-20 15:05:10.345	63692	68450	63183	70093
2014-10-20 15:05:10.349	63678	68447	63181	70120
2014-10-20 15:05:10.355	63673	68458	63160	70149
2014-10-20 15:05:10.359	63683	68454	63154	70142
2014-10-20 15:05:10.365	63679	68461	63182	70141
2014-10-20 15:05:10.369	63664	68459	63214	70149
2014-10-20 15:05:10.375	63659	68450	63254	70155
2014-10-20 15:05:10.380	63685	68457	63257	70184
2014-10-20 15:05:10.384	63689	68456	63247	70208
2014-10-20 15:05:10.390	63678	68450	63251	70207
2014-10-20 15:05:10.394	63690	68442	63223	70194
2014-10-20 15:05:10.400	63690	68437	63199	70186
2014-10-20 15:05:10.404	63672	68453	63193	70194
2014-10-20 15:05:10.410	63675	68462	63198	70174
2014-10-20 15:05:10.414	63681	68457	63214	70140
2014-10-20 15:05:10.420	63677	68454	63208	70133
2014-10-20 15:05:10.424	63676	68453	63193	70113
2014-10-20 15:05:10.430	63686	68450	63192	70099
2014-10-20 15:05:10.434	63689	68450	63200	70109
2014-10-20 15:05:10.440	63681	68456	63199	70103
2014-10-20 15:05:10.444	63683	68458	63201	70137
2014-10-20 15:05:10.450	63679	68458	63234	70178
2014-10-20 15:05:10.454	63682	68444	63239	70180
2014-10-20 15:05:10.460	63685	68450	63210	70167
2014-10-20 15:05:10.464	63680	68465	63196	70148
2014-10-20 15:05:10.470	63692	68463	63170	70156
2014-10-20 15:05:10.474	63685	68464	63166	70163
2014-10-20 15:05:10.480	63691	68472	63184	70190
2014-10-20 15:05:10.484	63711	68466	63195	70201
2014-10-20 15:05:10.490	63687	68459	63201	70184
2014-10-20 15:05:10.494	63675	68476	63184	70205
2014-10-20 15:05:10.500	63691	68470	63168	70203
2014-10-20 15:05:10.505	63692	68461	63152	70189
2014-10-20 15:05:10.509	63692	68475	63140	70180
2014-10-20 15:05:10.515	63698	68466	63156	70159
2014-10-20 15:05:10.519	63695	68455	63174	70140
2014-10-20 15:05:10.525	63699	68465	63194	70113
2014-10-20 15:05:10.529	63698	68476	63223	70086
2014-10-20 15:05:10.535	63694	68466	63242	70051
2014-10-20 15:05:10.539	63697	68458	63244	70074
2014-10-20 15:05:10.545	63686	68461	63255	70132
2014-10-20 15:05:10.549	63682	68472	63270	70169
2014-10-20 15:05:10.555	63685	68465	63275	70211
2014-10-20 15:05:10.559	63689	68462	63283	70216
2014-10-20 15:05:10.565	63688	68484	63244	70208
2014-10-20 15:05:10.569	63683	68469	63207	70201
2014-10-20 15:05:10.575	63695	68464	63220	70203
2014-10-20 15:05:10.579	63691	68476	63216	70218
2014-10-20 15:05:10.585	63686	68464	63231	70207
2014-10-20 15:05:10.589	63690	68479	63251	70203
2014-10-20 15:05:10.595	63688	68490	63233	70184
2014-10-20 15:05:10.599	63698	68477	63247	70138
2014-10-20 15:05:10.605	63682	68479	63257	70113
2014-10-20 15:05:10.609	63677	68478	63238	70125
2014-10-20 15:05:10.615	63700	68477	63236	70142
2014-10-20 15:05:10.619	63688	68478	63229	70158
2014-10-20 15:05:10.625	63686	68476	63225	70172
2014-10-20 15:05:10.630	63687	68477	63240	70164
2014-10-20 15:05:10.634	63686	68457	63248	70133
2014-10-20 15:05:10.640	63696	68467	63268	70122
2014-10-20 15:05:10.644	63693	68484	63304	70161
2014-10-20 15:05:10.650	63698	68471	63298	70185
2014-10-20 15:05:10.654	63694	68473	63265	70195
2014-10-20 15:05:10.660	63694	68470	63240	70222
2014-10-20 15:05:10.664	63699	68468	63215	70235
2014-10-20 15:05:10.670	63689	68471	63190	70202
2014-10-20 15:05:10.674	63684	68474	63172	70167
2014-10-20 15:05:10.680	63681	68474	63152	70158
2014-10-20 15:05:10.684	63694	68468	63145	70126
2014-10-20 15:05:10.690	63688	68468	63168	70116
2014-10-20 15:05:10.694	63684	68477	63186	70133
2014-10-20 15:05:10.700	63697	68484	63199	70139
2014-10-20 15:05:10.704	63693	68472	63212	70175
2014-10-20 15:05:10.710	63694	68475	63203	70179
2014-10-20 15:05:10.714	63691	68487	63207	70157
2014-10-20 15:05:10.720	63694	68480	63228	70157
2014-10-20 15:05:10.724	63699	68484	63246	70155
2014-10-20 15:05:10.730	63691	68484	63269	70179
2014-10-20 15:05:10.734	63691	68476	63278	70189
2014-10-20 15:05:10.740	63693	68471	63263	70197
2014-10-20 15:05:10.744	63694	68473	63240	70220
2014-10-20 15:05:10.750	63684	68484	63226	70207
2014-10-20 15:05:10.755	63677	68484	63211	70210
2014-10-20 15:05:10.759	63689	68475	63189	70181
2014-10-20 15:05:10.765	63693	68477	63189	70130
2014-10-20 15:05:10.769	63681	68470	63219	70127
2014-10-20 15:05:10.775	63685	68467	63223	70132
2014-10-20 15:05:10.779	63697	68490	63216	70157
2014-10-20 15:05:10.785	63699	68484	63220	70166
2014-10-20 15:05:10.789	63698	68470	63198	70154
2014-10-20 15:05:10.795	63689	68484	63185	70168
2014-10-20 15:05:10.799	63700	68476	63180	70170
2014-10-20 15:05:10.805	63704	68471	63183	70164
2014-10-20 15:05:10.809	63698	68482	63225	70180
2014-10-20 15:05:10.815	63699	68479	63255	70182
2014-10-20 15:05:10.819	63687	68476	63251	70161
2014-10-20 15:05:10.825	63698	68474	63246	70162
2014-10-20 15:05:10.829	63695	68475	63239	70185
2014-10-20 15:05:10.835	63691	68483	63218	70220
2014-10-20 15:05:10.839	63703	68490	63211	70247
2014-10-20 15:05:10.845	63691	68482	63202	70270
2014-10-20 15:05:10.849	63699	68475	63206	70277
2014-10-20 15:05:10.855	63693	68488	63240	70214
2014-10-20 15:05:10.859	63690	68482	63225	70150
2014-10-20 15:05:10.865	63705	68482	63212	70128
2014-10-20 15:05:10.869	63693	68498	63226	70138
2014-10-20 15:05:10.875	63686	68485	63222	70157
2014-10-20 15:05:10.880	63690	68472	63230	70156
2014-10-20 15:05:10.884	63698	68463	63223	70164
2014-10-20 15:05:10.890	63702	68470	63217	70124
2014-10-20 15:05:10.894	63700	68476	63224	70091
2014-10-20 15:05:10.900	63699	68474	63212	70108
2014-10-20 15:05:10.904	63692	68490	63231	70116
2014-10-20 15:05:10.910	63689	68477	63250	70153
2014-10-20 15:05:10.914	63698	68470	63259	70177
2014-10-20 15:05:10.920	63689	68475	63293	70176
2014-10-20 15:05:10.924	63682	68468	63309	70178
2014-10-20 15:05:10.930	63703	68466	63301	70162
2014-10-20 15:05:10.934	63688	68474	63287	70172
2014-10-20 15:05:10.940	63666	68496	63282	70207
2014-10-20 15:05:10.944	63687	68487	63265	70233
2014-10-20 15:05:10.950	63697	68470	63245	70253
2014-10-20 15:05:10.954	63693	68490	63241	70264
2014-10-20 15:05:10.960	63692	68487	63230	70250
2014-10-20 15:05:10.964	63688	68473	63229	70207
2014-10-20 15:05:10.970	63697	68486	63245	70170
2014-10-20 15:05:10.974	63698	68482	63252	70157
2014-10-20 15:05:10.980	63695	68472	63238	70156
2014-10-20 15:05:10.984	63698	68485	63216	70140
2014-10-20 15:05:10.990	63697	68495	63203	70113
2014-10-20 15:05:10.994	63679	68481	63193	70090
2014-10-20 15:05:11.000	63682	68474	63171	70078
2014-10-20 15:05:11.005	63700	68484	63155	70086
2014-10-20 15:05:11.009	63693	68477	63167	70100
2014-10-20 15:05:11.015	63698	68474	63181	70137
2014-10-20 15:05:11.019	63695	68473	63205	70165
2014-10-20 15:05:11.025	63681	68474	63218	70194
2014-10-20 15:05:11.029	63690	68492	63208	70249
2014-10-20 15:05:11.035	63695	68483	63203	70247
2014-10-20 15:05:11.039	63690	68480	63170	70246
2014-10-20 15:05:11.045	63689	68495	63145	70268
2014-10-20 15:05:11.049	63690	68493	63149	70265
2014-10-20 15:05:11.055	63687	68492	63145	70243
2014-10-20 15:05:11.059	63687	68491	63173	70206
2014-10-20 15:05:11.065	63683	68488	63214	70192
2014-10-20 15:05:11.069	63690	68491	63217	70176
2014-10-20 15:05:11.075	63695	68486	63236	70129
2014-10-20 15:05:11.079	63682	68486	63262	70082
2014-10-20 15:05:11.085	63687	68468	63268	70078
2014-10-20 15:05:11.089	63690	68457	63297	70106
2014-10-20 15:05:11.095	63679	68486	63296	70128
2014-10-20 15:05:11.099	63681	68477	63271	70124
2014-10-20 15:05:11.105	63682	68467	63268	70086
2014-10-20 15:05:11.109	63689	68482	63250	70082
2014-10-20 15:05:11.115	63693	68475	63237	70132
2014-10-20 15:05:11.119	63679	68472	63236	70193
2014-10-20 15:05:11.125	63687	68472	63229	70231
2014-10-20 15:05:11.130	63700	68470	63224	70243
2014-10-20 15:05:11.134	63690	68469	63217	70251
2014-10-20 15:05:11.140	63686	68473	63208	70249
2014-10-20 15:05:11.144	63688	68475	63189	70236
2014-10-20 15:05:11.150	63690	68459	63178	70207
2014-10-20 15:05:11.154	63699	68466	63192	70187
2014-10-20 15:05:11.160	63711	68474	63196	70167
2014-10-20 15:05:11.164	63700	68459	63178	70136
2014-10-20 15:05:11.170	63675	68462	63185	70125
2014-10-20 15:05:11.174	63677	68474	63201	70100
2014-10-20 15:05:11.180	63695	68479	63209	70084
2014-10-20 15:05:11.184	63690	68465	63220	70119
2014-10-20 15:05:11.190	63677	68474	63209	70152
2014-10-20 15:05:11.194	63694	68472	63197	70184
2014-10-20 15:05:11.200	63696	68442	63198	70217
2014-10-20 15:05:11.204	63682	68473	63187	70227
2014-10-20 15:05:11.210	63695	68483	63193	70230
2014-10-20 15:05:11.214	63691	68467	63213	70218
2014-10-20 15:05:11.220	63689	68482	63211	70185
2014-10-20 15:05:11.224	63696	68471	63222	70170
2014-10-20 15:05:11.230	63688	68463	63239	70155
2014-10-20 15:05:11.234	63693	68472	63237	70148
2014-10-20 15:05:11.240	63692	68464	63234	70145
2014-10-20 15:05:11.244	63679	68461	63235	70135
2014-10-20 15:05:11.250	63676	68474	63229	70123
2014-10-20 15:05:11.255	63680	68474	63238	70113
2014-10-20 15:05:11.259	63680	68462	63255	70164
2014-10-20 15:05:11.265	63667	68482	63245	70191
2014-10-20 15:05:11.269	63676	68480	63231	70158
2014-10-20 15:05:11.275	63684	68462	63224	70150
2014-10-20 15:05:11.279	63680	68477	63208	70128
2014-10-20 15:05:11.285	63688	68472	63208	70122
2014-10-20 15:05:11.289	63682	68466	63205	70139
2014-10-20 15:05:11.295	63692	68467	63203	70137
2014-10-20 15:05:11.299	63686	68464	63206	70174
2014-10-20 15:05:11.305	63669	68465	63179	70218
2014-10-20 15:05:11.309	63677	68464	63168	70238
2014-10-20 15:05:11.315	63674	68475	63179	70249
2014-10-20 15:05:11.319	63681	68473	63201	70237
2014-10-20 15:05:11.325	63667	68462	63232	70195
2014-10-20 15:05:11.329	63661	68468	63237	70141
2014-10-20 15:05:11.335	63678	68458	63245	70129
2014-10-20 15:05:11.339	63670	68453	63241	70140
2014-10-20 15:05:11.345	63677	68457	63211	70144
2014-10-20 15:05:11.349	63676	68460	63199	70158
2014-10-20 15:05:11.355	63669	68469	63187	70160
2014-10-20 15:05:11.359	63677	68454	63186	70146
2014-10-20 15:05:11.365	63680	68461	63194	70130
2014-10-20 15:05:11.369	63676	68466	63198	70116
2014-10-20 15:05:11.375	63671	68436	63211	70105
2014-10-20 15:05:11.380	63682	68441	63200	70102
2014-10-20 15:05:11.384	63685	68464	63181	70114
2014-10-20 15:05:11.390	63674	68455	63196	70113
2014-10-20 15:05:11.394	63672	68449	63221	70114
2014-10-20 15:05:11.400	63686	68454	63244	70136
2014-10-20 15:05:11.404	63682	68454	63232	70169
2014-10-20 15:05:11.410	63659	68466	63202	70210
2014-10-20 15:05:11.414	63673	68462	63198	70227
2014-10-20 15:05:11.420	63680	68449	63169	70238
2014-10-20 15:05:11.424	63670	68464	63147	70258
2014-10-20 15:05:11.430	63670	68456	63165	70234
2014-10-20 15:05:11.434	63669	68455	63169	70211
2014-10-20 15:05:11.440	63685	68456	63175	70191
2014-10-20 15:05:11.444	63668	68436	63188	70142
2014-10-20 15:05:11.450	63646	68449	63182	70107
2014-10-20 15:05:11.454	63672	68459	63171	70076
2014-10-20 15:05:11.460	63676	68450	63156	70057
2014-10-20 15:05:11.464	63666	68455	63169	70060
2014-10-20 15:05:11.470	63666	68443	63215	70051
2014-10-20 15:05:11.474	63671	68443	63235	70048
2014-10-20 15:05:11.480	63664	68451	63227	70071
2014-10-20 15:05:11.484	63659	68450	63219	70118
2014-10-20 15:05:11.490	63664	68464	63224	70173
2014-10-20 15:05:11.494	63665	68458	63234	70211
2014-10-20 15:05:11.500	63661	68452	63217	70242
2014-10-20 15:05:11.505	63654	68454	63204	70253
2014-10-20 15:05:11.509	63667	68439	63207	70225
2014-10-20 15:05:11.515	63659	68437	63199	70214
2014-10-20 15:05:11.519	63660	68445	63193	70206
2014-10-20 15:05:11.525	63686	68448	63194	70160
2014-10-20 15:05:11.529	63660	68457	63180	70157
2014-10-20 15:05:11.535	63651	68449	63180	70185
2014-10-20 15:05:11.539	63663	68439	63216	70156
2014-10-20 15:05:11.545	63667	68450	63250	70121
2014-10-20 15:05:11.549	63681	68446	63257	70096
2014-10-20 15:05:11.555	63664	68444	63243	70063
2014-10-20 15:05:11.559	63656	68451	63226	70049
2014-10-20 15:05:11.565	63662	68441	63219	70056
2014-10-20 15:05:11.569	63652	68432	63218	70081
2014-10-20 15:05:11.575	63665	68443	63216	70104
2014-10-20 15:05:11.579	63664	68444	63212	70135
2014-10-20 15:05:11.585	63667	68427	63197	70168
2014-10-20 15:05:11.589	63665	68442	63168	70191
2014-10-20 15:05:11.595	63652	68449	63157	70192
2014-10-20 15:05:11.599	63660	68438	63155	70159
2014-10-20 15:05:11.605	63651	68447	63139	70141
2014-10-20 15:05:11.609	63651	68428	63135	70154
2014-10-20 15:05:11.615	63645	68428	63146	70165
2014-10-20 15:05:11.619	63638	68446	63167	70176
2014-10-20 15:05:11.625	63659	68442	63187	70209
2014-10-20 15:05:11.630	63650	68446	63204	70189
2014-10-20 15:05:11.634	63655	68433	63218	70125
2014-10-20 15:05:11.640	63664	68425	63220	70105
2014-10-20 15:05:11.644	63646	68439	63225	70099
2014-10-20 15:05:11.650	63645	68432	63233	70100
2014-10-20 15:05:11.654	63650	68440	63218	70106
2014-10-20 15:05:11.660	63654	68444	63200	70098
2014-10-20 15:05:11.664	63656	68422	63186	70083
2014-10-20 15:05:11.670	63651	68424	63141	70071
2014-10-20 15:05:11.674	63653	68418	63121	70079
2014-10-20 15:05:11.680	63653	68422	63149	70101
2014-10-20 15:05:11.684	63643	68434	63161	70134
2014-10-20 15:05:11.690	63647	68427	63149	70147
2014-10-20 15:05:11.694	63658	68429	63142	70155
2014-10-20 15:05:11.700	63649	68429	63139	70154
2014-10-20 15:05:11.704	63647	68422	63129	70147
2014-10-20 15:05:11.710	63639	68425	63131	70173
2014-10-20 15:05:11.714	63640	68424	63149	70172
2014-10-20 15:05:11.720	63660	68423	63166	70154
2014-10-20 15:05:11.724	63649	68434	63187	70121
2014-10-20 15:05:11.730	63632	68425	63223	70074
2014-10-20 15:05:11.734	63634	68426	63230	70067
2014-10-20 15:05:11.740	63651	68431	63194	70056
2014-10-20 15:05:11.744	63649	68416	63172	70063
2014-10-20 15:05:11.750	63628	68422	63170	70083
2014-10-20 15:05:11.755	63636	68423	63167	70104
2014-10-20 15:05:11.759	63649	68409	63153	70138
2014-10-20 15:05:11.765	63643	68407	63130	70135
2014-10-20 15:05:11.769	63634	68423	63130	70153
2014-10-20 15:05:11.775	63635	68420	63151	70164
2014-10-20 15:05:11.779	63640	68405	63160	70143
2014-10-20 15:05:11.785	63631	68421	63162	70137
2014-10-20 15:05:11.789	63631	68415	63165	70126
2014-10-20 15:05:11.795	63638	68406	63167	70128
2014-10-20 15:05:11.799	63627	68417	63166	70099
2014-10-20 15:05:11.805	63628	68415	63169	70067
2014-10-20 15:05:11.809	63633	68414	63176	70075
2014-10-20 15:05:11.815	63618	68412	63183	70056
2014-10-20 15:05:11.819	63623	68409	63206	70066
2014-10-20 15:05:11.825	63623	68416	63225	70102
2014-10-20 15:05:11.829	63619	68407	63216	70122
2014-10-20 15:05:11.835	63625	68404	63203	70133
2014-10-20 15:05:11.839	63624	68408	63191	70102
2014-10-20 15:05:11.845	63627	68395	63176	70086
2014-10-20 15:05:11.849	63624	68401	63156	70096
2014-10-20 15:05:11.855	63621	68408	63135	70087
2014-10-20 15:05:11.859	63622	68403	63124	70097
2014-10-20 15:05:11.865	63624	68410	63125	70114
2014-10-20 15:05:11.869	63623	68408	63143	70121
2014-10-20 15:05:11.875	63615	68394	63153	70120
2014-10-20 15:05:11.880	63606	68403	63155	70114
2014-10-20 15:05:11.884	63604	68417	63168	70115
2014-10-20 15:05:11.890	63614	68413	63153	70102
2014-10-20 15:05:11.894	63619	68402	63137	70095
2014-10-20 15:05:11.900	63612	68389	63147	70104
2014-10-20 15:05:11.904	63612	68404	63149	70130
2014-10-20 15:05:11.910	63615	68401	63146	70149
2014-10-20 15:05:11.914	63605	68372	63156	70146
2014-10-20 15:05:11.920	63616	68386	63167	70142
2014-10-20 15:05:11.924	63623	68408	63172	70117
2014-10-20 15:05:11.930	63604	68386	63177	70091
2014-10-20 15:05:11.934	63617	68377	63178	70065
2014-10-20 15:05:11.940	63616	68403	63178	70037
2014-10-20 15:05:11.944	63599	68397	63171	70022
2014-10-20 15:05:11.950	63601	68375	63165	70004
2014-10-20 15:05:11.954	63603	68378	63152	69999
2014-10-20 15:05:11.960	63608	68380	63152	70020
2014-10-20 15:05:11.964	63607	68381	63166	70049
2014-10-20 15:05:11.970	63605	68390	63149	70072
2014-10-20 15:05:11.974	63608	68385	63132	70078
2014-10-20 15:05:11.980	63604	68370	63136	70097
2014-10-20 15:05:11.984	63603	68379	63147	70105
2014-10-20 15:05:11.990	63599	68384	63147	70123
2014-10-20 15:05:11.994	63598	68371	63134	70163
2014-10-20 15:05:12.000	63608	68366	63133	70161
2014-10-20 15:05:12.005	63595	68368	63135	70147
2014-10-20 15:05:12.009	63584	68379	63130	70136
2014-10-20 15:05:12.015	63600	68372	63123	70103
2014-10-20 15:05:12.019	63598	68362	63119	70058
2014-10-20 15:05:12.025	63591	68371	63120	70020
2014-10-20 15:05:12.029	63593	68364	63120	69995
2014-10-20 15:05:12.035	63591	68362	63113	69957
2014-10-20 15:05:12.039	63603	68358	63119	69957
2014-10-20 15:05:12.045	63603	68368	63111	69991
2014-10-20 15:05:12.049	63584	68375	63095	70024
2014-10-20 15:05:12.055	63590	68355	63111	70081
2014-10-20 15:05:12.059	63589	68361	63112	70109
2014-10-20 15:05:12.065	63583	68360	63109	70116
2014-10-20 15:05:12.069	63592	68342	63114	70112
2014-10-20 15:05:12.075	63587	68338	63101	70101
2014-10-20 15:05:12.079	63582	68338	63102	70111
2014-10-20 15:05:12.085	63587	68355	63123	70107
2014-10-20 15:05:12.089	63584	68357	63123	70108
2014-10-20 15:05:12.095	63573	68341	63119	70118
2014-10-20 15:05:12.099	63571	68355	63124	70078
2014-10-20 15:05:12.105	63572	68358	63101	70017
2014-10-20 15:05:12.109	63566	68347	63072	69977
2014-10-20 15:05:12.115	63572	68341	63078	69960
2014-10-20 15:05:12.119	63569	68345	63102	69973
2014-10-20 15:05:12.125	63573	68353	63123	70016
2014-10-20 15:05:12.130	63588	68325	63124	70073
2014-10-20 15:05:12.134	63568	68334	63093	70101
2014-10-20 15:05:12.140	63571	68341	63078	70086
2014-10-20 15:05:12.144	63569	68322	63084	70062
2014-10-20 15:05:12.150	63552	68338	63070	70046
2014-10-20 15:05:12.154	63574	68339	63072	70028
2014-10-20 15:05:12.160	63561	68331	63068	70034
2014-10-20 15:05:12.164	63556	68324	63047	70053
2014-10-20 15:05:12.170	63567	68334	63059	70071
2014-10-20 15:05:12.174	63554	68352	63081	70088
2014-10-20 15:05:12.180	63553	68328	63093	70071
2014-10-20 15:05:12.184	63551	68325	63113	70032
2014-10-20 15:05:12.190	63562	68340	63124	70027
2014-10-20 15:05:12.194	63552	68339	63116	70029
2014-10-20 15:05:12.200	63540	68326	63120	70026
2014-10-20 15:05:12.204	63565	68320	63113	70030
2014-10-20 15:05:12.210	63559	68337	63101	70017
2014-10-20 15:05:12.214	63544	68329	63099	70011
2014-10-20 15:05:12.220	63549	68321	63085	70016
2014-10-20 15:05:12.224	63541	68331	63093	70017
2014-10-20 15:05:12.230	63542	68312	63098	70029
2014-10-20 15:05:12.234	63542	68312	63091	70040
2014-10-20 15:05:12.240	63538	68325	63096	70041
2014-10-20 15:05:12.244	63546	68306	63108	70034
2014-10-20 15:05:12.250	63540	68311	63117	70039
2014-10-20 15:05:12.255	63547	68314	63113	70062
2014-10-20 15:05:12.259	63549	68308	63107	70061
2014-10-20 15:05:12.265	63531	68325	63086	70043
2014-10-20 15:05:12.269	63531	68324	63090	70045
2014-10-20 15:05:12.275	63524	68322	63110	70059
2014-10-20 15:05:12.279	63526	68314	63126	70037
2014-10-20 15:05:12.285	63533	68290	63131	70010
2014-10-20 15:05:12.289	63530	68305	63101	70024
2014-10-20 15:05:12.295	63535	68315	63094	70031
2014-10-20 15:05:12.299	63525	68303	63097	70026
2014-10-20 15:05:12.305	63519	68320	63080	70018
2014-10-20 15:05:12.309	63526	68319	63077	70006
2014-10-20 15:05:12.315	63539	68309	63072	69977
2014-10-20 15:05:12.319	63542	68320	63072	69960
2014-10-20 15:05:12.325	63514	68297	63079	69979
2014-10-20 15:05:12.329	63519	68290	63085	69963
2014-10-20 15:05:12.335	63527	68302	63078	69952
2014-10-20 15:05:12.339	63508	68296	63046	69969
2014-10-20 15:05:12.345	63513	68310	63029	69975
2014-10-20 15:05:12.349	63527	68308	63041	69991
2014-10-20 15:05:12.355	63528	68306	63043	69997
2014-10-20 15:05:12.359	63515	68299	63024	70027
2014-10-20 15:05:12.365	63515	68281	63010	70043
2014-10-20 15:05:12.369	63522	68282	63010	70044
2014-10-20 15:05:12.375	63511	68270	63030	70097
2014-10-20 15:05:12.380	63512	68278	63055	70111
2014-10-20 15:05:12.384	63510	68286	63064	70086
2014-10-20 15:05:12.390	63506	68280	63066	70030
2014-10-20 15:05:12.394	63510	68284	63073	69956
2014-10-20 15:05:12.400	63508	68278	63079	69938
2014-10-20 15:05:12.404	63499	68294	63077	69900
2014-10-20 15:05:12.410	63508	68293	63070	69895
2014-10-20 15:05:12.414	63508	68262	63070	69945
2014-10-20 15:05:12.420	63495	68279	63075	69939
2014-10-20 15:05:12.424	63505	68278	63070	69936
2014-10-20 15:05:12.430	63495	68266	63058	69926
2014-10-20 15:05:12.434	63498	68285	63063	69923
2014-10-20 15:05:12.440	63503	68280	63053	69958
2014-10-20 15:05:12.444	63487	68281	63022	69990
2014-10-20 15:05:12.450	63496	68266	63009	70051
2014-10-20 15:05:12.454	63496	68252	62989	70081
2014-10-20 15:05:12.460	63499	68272	62985	70064
2014-10-20 15:05:12.464	63501	68253	62998	70052
2014-10-20 15:05:12.470	63489	68263	63009	70033
2014-10-20 15:05:12.474	63490	68283	63034	70034
2014-10-20 15:05:12.480	63480	68262	63032	70029
2014-10-20 15:05:12.484	63473	68264	63036	70008
2014-10-20 15:05:12.490	63488	68253	63063	70000
2014-10-20 15:05:12.494	63485	68268	63049	69971
2014-10-20 15:05:12.500	63487	68276	63016	69915
2014-10-20 15:05:12.505	63484	68258	63014	69875
2014-10-20 15:05:12.509	63466	68270	63021	69878
2014-10-20 15:05:12.515	63483	68262	63014	69857
2014-10-20 15:05:12.519	63486	68269	63028	69872
2014-10-20 15:05:12.525	63473	68258	63059	69953
2014-10-20 15:05:12.529	63479	68241	63057	69968
2014-10-20 15:05:12.535	63474	68267	63035	69969
2014-10-20 15:05:12.539	63478	68255	63014	69982
2014-10-20 15:05:12.545	63473	68254	62996	69972
2014-10-20 15:05:12.549	63472	68263	62994	69985
2014-10-20 15:05:12.555	63478	68230	62995	69994
2014-10-20 15:05:12.559	63472	68246	63001	70000
2014-10-20 15:05:12.565	63479	68249	63018	70020
2014-10-20 15:05:12.569	63472	68234	63017	70010
2014-10-20 15:05:12.575	63466	68263	63014	69973
2014-10-20 15:05:12.579	63468	68252	62992	69945
2014-10-20 15:05:12.585	63464	68239	62965	69932
2014-10-20 15:05:12.589	63457	68247	62977	69909
2014-10-20 15:05:12.595	63446	68250	62975	69894
2014-10-20 15:05:12.599	63455	68257	62987	69927
2014-10-20 15:05:12.605	63452	68240	63018	69950
2014-10-20 15:05:12.609	63436	68239	63015	69945
2014-10-20 15:05:12.615	63455	68240	63007	69958
2014-10-20 15:05:12.619	63462	68237	63010	69982
2014-10-20 15:05:12.625	63450	68248	62997	69964
2014-10-20 15:05:12.630	63451	68238	62987	69933
2014-10-20 15:05:12.634	63450	68232	63009	69917
2014-10-20 15:05:12.640	63461	68250	63012	69893
2014-10-20 15:05:12.644	63449	68261	63003	69904
2014-10-20 15:05:12.650	63455	68241	62996	69919
2014-10-20 15:05:12.654	63471	68232	62962	69931
2014-10-20 15:05:12.660	63438	68246	62961	69932
2014-10-20 15:05:12.664	63449	68234	62999	69902
2014-10-20 15:05:12.670	63469	68233	63029	69890
2014-10-20 15:05:12.674	63464	68248	63042	69884
2014-10-20 15:05:12.680	63456	68245	63046	69936
2014-10-20 15:05:12.684	63438	68239	63045	69994
2014-10-20 15:05:12.690	63452	68221	63020	70001
2014-10-20 15:05:12.694	63453	68221	62993	70025
2014-10-20 15:05:12.700	63436	68237	62973	70008
2014-10-20 15:05:12.704	63435	68218	62959	69982
2014-10-20 15:05:12.710	63442	68221	62958	69983
2014-10-20 15:05:12.714	63447	68239	62951	69966
2014-10-20 15:05:12.720	63434	68220	62946	69944
2014-10-20 15:05:12.724	63444	68219	62959	69893
2014-10-20 15:05:12.730	63445	68233	62981	69852
2014-10-20 15:05:12.734	63435	68222	62986	69847
2014-10-20 15:05:12.740	63445	68207	62981	69819
2014-10-20 15:05:12.744	63424	68217	62974	69811
2014-10-20 15:05:12.750	63415	68224	62972	69841
2014-10-20 15:05:12.755	63427	68204	62985	69871
2014-10-20 15:05:12.759	63421	68210	62985	69914
2014-10-20 15:05:12.765	63428	68221	62976	69939
2014-10-20 15:05:12.769	63426	68216	62976	69956
2014-10-20 15:05:12.775	63427	68206	62961	69960
2014-10-20 15:05:12.779	63426	68205	62939	69945
2014-10-20 15:05:12.785	63410	68218	62949	69963
2014-10-20 15:05:12.789	63423	68205	62980	69966
2014-10-20 15:05:12.795	63423	68202	62971	69954
2014-10-20 15:05:12.799	63417	68203	62955	69969
2014-10-20 15:05:12.805	63424	68191	62961	69968
2014-10-20 15:05:12.809	63409	68203	62950	69938
2014-10-20 15:05:12.815	63411	68210	62957	69912
2014-10-20 15:05:12.819	63416	68205	62974	69894
2014-10-20 15:05:12.825	63410	68220	62988	69864
2014-10-20 15:05:12.829	63413	68220	63003	69854
2014-10-20 15:05:12.835	63405	68198	62989	69857
2014-10-20 15:05:12.839	63402	68204	62993	69864
2014-10-20 15:05:12.845	63400	68214	63021	69880
2014-10-20 15:05:12.849	63419	68210	63014	69886
2014-10-20 15:05:12.855	63419	68206	63005	69877
2014-10-20 15:05:12.859	63395	68200	63008	69854
2014-10-20 15:05:12.865	63419	68207	63005	69865
2014-10-20 15:05:12.869	63422	68195	62994	69898
2014-10-20 15:05:12.875	63409	68189	62971	69920
2014-10-20 15:05:12.880	63415	68218	62961	69928
2014-10-20 15:05:12.884	63414	68215	62951	69931
2014-10-20 15:05:12.890	63421	68204	62943	69948
2014-10-20 15:05:12.894	63416	68204	62965	69944
2014-10-20 15:05:12.900	63420	68198	62968	69937
2014-10-20 15:05:12.904	63414	68195	62957	69930
2014-10-20 15:05:12.910	63397	68185	62955	69919
2014-10-20 15:05:12.914	63419	68198	62938	69921
2014-10-20 15:05:12.920	63431	68207	62935	69901
2014-10-20 15:05:12.924	63413	68193	62953	69861
2014-10-20 15:05:12.930	63393	68199	62967	69831
2014-10-20 15:05:12.934	63405	68194	62964	69837
2014-10-20 15:05:12.940	63420	68191	62935	69861
2014-10-20 15:05:12.944	63402	68199	62907	69872
2014-10-20 15:05:12.950	63400	68193	62898	69906
2014-10-20 15:05:12.954	63408	68187	62905	69926
2014-10-20 15:05:12.960	63409	68192	62928	69890
2014-10-20 15:05:12.964	63399	68202	62955	69875
2014-10-20 15:05:12.970	63383	68189	62972	69879
2014-10-20 15:05:12.974	63406	68188	62992	69870
2014-10-20 15:05:12.980	63400	68200	63000	69890
2014-10-20 15:05:12.984	63384	68191	62994	69905
2014-10-20 15:05:12.990	63406	68197	62988	69913
2014-10-20 15:05:12.994	63390	68194	62956	69926
2014-10-20 15:05:13.000	63384	68189	62930	69914
2014-10-20 15:05:13.005	63394	68193	62935	69884
2014-10-20 15:05:13.009	63394	68188	62935	69854
2014-10-20 15:05:13.015	63396	68188	62948	69867
2014-10-20 15:05:13.019	63390	68197	62942	69901
2014-10-20 15:05:13.025	63408	68191	62917	69908
2014-10-20 15:05:13.029	63399	68181	62933	69926
2014-10-20 15:05:13.035	63378	68193	62963	69938
2014-10-20 15:05:13.039	63396	68190	62985	69912
2014-10-20 15:05:13.045	63404	68183	62985	69889
2014-10-20 15:05:13.049	63404	68181	62959	69862
2014-10-20 15:05:13.055	63384	68177	62948	69838
2014-10-20 15:05:13.059	63377	68181	62929	69820
2014-10-20 15:05:13.065	63408	68172	62900	69805
2014-10-20 15:05:13.069	63407	68168	62900	69839
2014-10-20 15:05:13.075	63390	68176	62929	69876
2014-10-20 15:05:13.079	63388	68173	62960	69923
2014-10-20 15:05:13.085	63392	68168	62954	69950
2014-10-20 15:05:13.089	63401	68179	62947	69911
2014-10-20 15:05:13.095	63394	68182	62952	69896
2014-10-20 15:05:13.099	63398	68175	62954	69901
2014-10-20 15:05:13.105	63396	68178	62965	69895
2014-10-20 15:05:13.109	63388	68168	62977	69894
2014-10-20 15:05:13.115	63403	68178	63011	69913
2014-10-20 15:05:13.119	63399	68183	63027	69950
2014-10-20 15:05:13.125	63396	68168	62998	69951
2014-10-20 15:05:13.130	63393	68182	62970	69909
2014-10-20 15:05:13.134	63392	68176	62941	69866
2014-10-20 15:05:13.140	63401	68179	62918	69838
2014-10-20 15:05:13.144	63392	68191	62913	69845
2014-10-20 15:05:13.150	63401	68181	62906	69843
2014-10-20 15:05:13.154	63396	68189	62903	69831
2014-10-20 15:05:13.160	63386	68191	62919	69864
2014-10-20 15:05:13.164	63393	68184	62930	69881
2014-10-20 15:05:13.170	63397	68185	62933	69870
2014-10-20 15:05:13.174	63400	68184	62953	69857
2014-10-20 15:05:13.180	63391	68175	62952	69836
2014-10-20 15:05:13.184	63392	68165	62941	69835
2014-10-20 15:05:13.190	63390	68183	62974	69857
2014-10-20 15:05:13.194	63390	68184	62990	69902
2014-10-20 15:05:13.200	63395	68167	62963	69913
2014-10-20 15:05:13.204	63396	68191	62944	69900
2014-10-20 15:05:13.210	63392	68188	62930	69908
2014-10-20 15:05:13.214	63383	68170	62910	69901
2014-10-20 15:05:13.220	63404	68193	62902	69896
2014-10-20 15:05:13.224	63392	68189	62904	69906
2014-10-20 15:05:13.230	63379	68186	62916	69897
2014-10-20 15:05:13.234	63407	68193	62934	69879
2014-10-20 15:05:13.240	63393	68182	62936	69881
2014-10-20 15:05:13.244	63395	68187	62932	69880
2014-10-20 15:05:13.250	63397	68179	62942	69866
2014-10-20 15:05:13.255	63384	68186	62928	69866
2014-10-20 15:05:13.259	63405	68194	62908	69857
2014-10-20 15:05:13.265	63393	68172	62907	69843
2014-10-20 15:05:13.269	63385	68181	62909	69844
2014-10-20 15:05:13.275	63387	68182	62941	69875
2014-10-20 15:05:13.279	63379	68171	62960	69901
2014-10-20 15:05:13.285	63396	68186	62951	69897
2014-10-20 15:05:13.289	63394	68179	62945	69887
2014-10-20 15:05:13.295	63400	68180	62924	69873
2014-10-20 15:05:13.299	63392	68190	62933	69869
2014-10-20 15:05:13.305	63368	68182	62947	69845
2014-10-20 15:05:13.309	63401	68183	62940	69842
2014-10-20 15:05:13.315	63393	68174	62945	69897
2014-10-20 15:05:13.319	63373	68173	62941	69920
2014-10-20 15:05:13.325	63394	68174	62936	69919
2014-10-20 15:05:13.329	63391	68182	62921	69902
2014-10-20 15:05:13.335	63401	68189	62915	69871
2014-10-20 15:05:13.339	63402	68173	62928	69866
2014-10-20 15:05:13.345	63400	68189	62924	69876
2014-10-20 15:05:13.349	63401	68189	62919	69910
2014-10-20 15:05:13.355	63386	68171	62913	69935
2014-10-20 15:05:13.359	63403	68170	62926	69920
2014-10-20 15:05:13.365	63403	68167	62939	69887
2014-10-20 15:05:13.369	63392	68179	62934	69865
2014-10-20 15:05:13.375	63401	68173	62947	69859
2014-10-20 15:05:13.380	63399	68171	62947	69848
2014-10-20 15:05:13.384	63397	68180	62947	69862
2014-10-20 15:05:13.390	63389	68172	62948	69899
2014-10-20 15:05:13.394	63390	68192	62944	69920
2014-10-20 15:05:13.400	63398	68184	62958	69908
2014-10-20 15:05:13.404	63398	68173	62948	69855
2014-10-20 15:05:13.410	63391	68199	62949	69815
2014-10-20 15:05:13.414	63397	68184	62957	69825
2014-10-20 15:05:13.420	63410	68176	62927	69872
2014-10-20 15:05:13.424	63391	68170	62931	69911
2014-10-20 15:05:13.430	63387	68172	62934	69907
2014-10-20 15:05:13.434	63404	68191	62921	69896
2014-10-20 15:05:13.440	63405	68180	62943	69900
2014-10-20 15:05:13.444	63401	68185	62956	69902
2014-10-20 15:05:13.450	63388	68187	62969	69883
2014-10-20 15:05:13.454	63390	68184	62994	69877
2014-10-20 15:05:13.460	63394	68186	63000	69886
2014-10-20 15:05:13.464	63395	68184	62992	69875
2014-10-20 15:05:13.470	63394	68194	62966	69867
2014-10-20 15:05:13.474	63400	68184	62946	69871
2014-10-20 15:05:13.480	63415	68181	62964	69864
2014-10-20 15:05:13.484	63392	68196	62983	69847
2014-10-20 15:05:13.490	63392	68184	62974	69861
2014-10-20 15:05:13.494	63406	68186	62953	69879
2014-10-20 15:05:13.500	63393	68187	62946	69883
2014-10-20 15:05:13.505	63391	68184	62964	69906
2014-10-20 15:05:13.509	63398	68185	62990	69907
2014-10-20 15:05:13.515	63412	68187	62992	69910
2014-10-20 15:05:13.519	63399	68200	62964	69923
2014-10-20 15:05:13.525	63394	68184	62930	69911
2014-10-20 15:05:13.529	63405	68178	62930	69874
2014-10-20 15:05:13.535	63395	68186	62931	69815
2014-10-20 15:05:13.539	63402	68175	62922	69792
2014-10-20 15:05:13.545	63413	68189	62944	69801
2014-10-20 15:05:13.549	63396	68191	62958	69826
2014-10-20 15:05:13.555	63385	68183	62954	69854
2014-10-20 15:05:13.559	63403	68190	62965	69839
2014-10-20 15:05:13.565	63396	68186	62963	69848
2014-10-20 15:05:13.569	63391	68194	62942	69882
2014-10-20 15:05:13.575	63403	68199	62927	69918
2014-10-20 15:05:13.579	63400	68197	62918	69972
2014-10-20 15:05:13.585	63398	68207	62931	69982
2014-10-20 15:05:13.589	63382	68193	62929	69974
2014-10-20 15:05:13.595	63396	68189	62922	69932
2014-10-20 15:05:13.599	63413	68207	62948	69898
2014-10-20 15:05:13.605	63404	68199	62951	69923
2014-10-20 15:05:13.609	63403	68191	62943	69932
2014-10-20 15:05:13.615	63394	68197	62930	69948
2014-10-20 15:05:13.619	63394	68196	62903	69957
2014-10-20 15:05:13.625	63395	68204	62897	69928
2014-10-20 15:05:13.630	63407	68201	62902	69881
2014-10-20 15:05:13.634	63415	68197	62923	69814
2014-10-20 15:05:13.640	63396	68209	62941	69786
2014-10-20 15:05:13.644	63406	68193	62965	69788
2014-10-20 15:05:13.650	63417	68186	62981	69784
2014-10-20 15:05:13.654	63414	68198	62963	69792
2014-10-20 15:05:13.660	63422	68202	62973	69804
2014-10-20 15:05:13.664	63411	68205	62977	69808
2014-10-20 15:05:13.670	63403	68204	62953	69842
2014-10-20 15:05:13.674	63411	68207	62955	69899
2014-10-20 15:05:13.680	63405	68206	62949	69951
2014-10-20 15:05:13.684	63414	68189	62948	70005
2014-10-20 15:05:13.690	63418	68182	62958	70020
2014-10-20 15:05:13.694	63399	68201	62951	70005
2014-10-20 15:05:13.700	63416	68204	62957	69995
2014-10-20 15:05:13.704	63415	68199	62963	69986
2014-10-20 15:05:13.710	63408	68199	62967	69973
2014-10-20 15:05:13.714	63432	68202	62989	69947
2014-10-20 15:05:13.720	63418	68206	63004	69946
2014-10-20 15:05:13.724	63403	68200	62994	69923
2014-10-20 15:05:13.730	63425	68211	62960	69879
2014-10-20 15:05:13.734	63420	68203	62951	69840
2014-10-20 15:05:13.740	63411	68201	62973	69798
2014-10-20 15:05:13.744	63429	68216	62990	69791
2014-10-20 15:05:13.750	63420	68195	62996	69797
2014-10-20 15:05:13.755	63409	68211	62990	69825
2014-10-20 15:05:13.759	63426	68218	62968	69842
2014-10-20 15:05:13.765	63437	68205	62928	69845
2014-10-20 15:05:13.769	63430	68215	62906	69875
2014-10-20 15:05:13.775	63425	68202	62934	69883
2014-10-20 15:05:13.779	63417	68199	62981	69896
2014-10-20 15:05:13.785	63416	68216	63016	69930
2014-10-20 15:05:13.789	63431	68217	63022	69956
2014-10-20 15:05:13.795	63416	68207	63026	69976
2014-10-20 15:05:13.799	63416	68211	63023	69980
2014-10-20 15:05:13.805	63437	68210	62990	69957
2014-10-20 15:05:13.809	63425	68206	62970	69938
2014-10-20 15:05:13.815	63423	68212	62968	69955
2014-10-20 15:05:13.819	63422	68220	62981	69974
2014-10-20 15:05:13.825	63427	68227	62988	69973
2014-10-20 15:05:13.829	63435	68217	62986	69964
2014-10-20 15:05:13.835	63421	68218	62980	69948
2014-10-20 15:05:13.839	63432	68235	62953	69916
2014-10-20 15:05:13.845	63436	68230	62960	69878
2014-10-20 15:05:13.849	63428	68228	62983	69857
2014-10-20 15:05:13.855	63429	68223	62987	69865
2014-10-20 15:05:13.859	63436	68212	62987	69869
2014-10-20 15:05:13.865	63439	68225	62969	69845
2014-10-20 15:05:13.869	63433	68227	62949	69854
2014-10-20 15:05:13.875	63445	68238	62930	69851
2014-10-20 15:05:13.880	63450	68248	62933	69824
2014-10-20 15:05:13.884	63426	68239	62953	69855
2014-10-20 15:05:13.890	63430	68228	62980	69901
2014-10-20 15:05:13.894	63447	68218	63007	69931
2014-10-20 15:05:13.900	63444	68236	62997	69965
2014-10-20 15:05:13.904	63435	68232	62977	69985
2014-10-20 15:05:13.910	63447	68223	62972	69990
2014-10-20 15:05:13.914	63463	68236	62995	70012
2014-10-20 15:05:13.920	63439	68230	63030	70042
2014-10-20 15:05:13.924	63418	68236	63029	70031
2014-10-20 15:05:13.930	63444	68234	63008	69974
2014-10-20 15:05:13.934	63455	68229	62986	69912
2014-10-20 15:05:13.940	63431	68239	62963	69888
2014-10-20 15:05:13.944	63434	68234	62950	69900
2014-10-20 15:05:13.950	63467	68237	62942	69894
2014-10-20 15:05:13.954	63461	68230	62944	69871
2014-10-20 15:05:13.960	63444	68239	62965	69870
2014-10-20 15:05:13.964	63458	68251	62979	69867
2014-10-20 15:05:13.970	63462	68218	62985	69864
2014-10-20 15:05:13.974	63453	68233	62992	69890
2014-10-20 15:05:13.980	63451	68246	62999	69932
2014-10-20 15:05:13.984	63467	68218	63001	69956
2014-10-20 15:05:13.990	63452	68241	62996	69971
2014-10-20 15:05:13.994	63442	68252	62999	69983
[truncated: 11,400 more rows]
