# Supplementary material for: Seismic monitoring of small alpine rockfalls – validity, precision and limitations
Source: Copernicus journal article supplement (doi:10.5194/esurf-5-653-2017), 2017-10-16
Supplement: Supplementary file 2 [file esurf-5-653-2017-supplement.zip › event_5.txt]

Time	LAU02	LAU03	LAU04	LAU05
2014-10-22 11:46:58.005	54532	56014	57806	56686
2014-10-22 11:46:58.009	54491	56009	57784	56711
2014-10-22 11:46:58.015	54506	56012	57852	56703
2014-10-22 11:46:58.019	54523	56020	57838	56684
2014-10-22 11:46:58.025	54489	56020	57833	56663
2014-10-22 11:46:58.029	54542	56013	57857	56669
2014-10-22 11:46:58.035	54476	56007	57841	56684
2014-10-22 11:46:58.039	54489	56008	57845	56680
2014-10-22 11:46:58.045	54538	56000	57820	56673
2014-10-22 11:46:58.049	54497	56001	57826	56675
2014-10-22 11:46:58.055	54531	56017	57831	56720
2014-10-22 11:46:58.059	54486	56046	57807	56746
2014-10-22 11:46:58.065	54494	56032	57799	56765
2014-10-22 11:46:58.069	54535	55999	57778	56805
2014-10-22 11:46:58.075	54478	55989	57800	56825
2014-10-22 11:46:58.079	54508	56003	57816	56836
2014-10-22 11:46:58.085	54514	56029	57818	56783
2014-10-22 11:46:58.089	54492	56041	57824	56726
2014-10-22 11:46:58.095	54504	56042	57833	56685
2014-10-22 11:46:58.099	54496	56021	57845	56615
2014-10-22 11:46:58.105	54504	55986	57855	56625
2014-10-22 11:46:58.109	54504	55998	57853	56646
2014-10-22 11:46:58.115	54514	56038	57796	56668
2014-10-22 11:46:58.119	54515	56042	57814	56705
2014-10-22 11:46:58.125	54496	56028	57801	56673
2014-10-22 11:46:58.130	54502	56002	57784	56663
2014-10-22 11:46:58.134	54509	55991	57836	56677
2014-10-22 11:46:58.140	54520	56018	57766	56680
2014-10-22 11:46:58.144	54517	56035	57822	56710
2014-10-22 11:46:58.150	54481	56021	57858	56731
2014-10-22 11:46:58.154	54478	56037	57770	56763
2014-10-22 11:46:58.160	54522	56027	57867	56791
2014-10-22 11:46:58.164	54538	55995	57892	56796
2014-10-22 11:46:58.170	54496	56017	57816	56796
2014-10-22 11:46:58.174	54482	56023	57855	56776
2014-10-22 11:46:58.180	54520	56036	57853	56742
2014-10-22 11:46:58.184	54520	56026	57832	56691
2014-10-22 11:46:58.190	54510	56006	57881	56678
2014-10-22 11:46:58.194	54518	56010	57836	56701
2014-10-22 11:46:58.200	54495	56021	57832	56664
2014-10-22 11:46:58.204	54498	56027	57917	56659
2014-10-22 11:46:58.210	54515	56017	57865	56673
2014-10-22 11:46:58.214	54519	56056	57818	56619
2014-10-22 11:46:58.220	54516	56049	57818	56625
2014-10-22 11:46:58.224	54494	56014	57808	56667
2014-10-22 11:46:58.230	54491	56024	57827	56712
2014-10-22 11:46:58.234	54505	56039	57859	56782
2014-10-22 11:46:58.240	54530	56026	57876	56802
2014-10-22 11:46:58.244	54499	56018	57829	56799
2014-10-22 11:46:58.250	54474	56047	57837	56783
2014-10-22 11:46:58.255	54518	56034	57871	56762
2014-10-22 11:46:58.259	54500	56019	57844	56770
2014-10-22 11:46:58.265	54506	56024	57876	56777
2014-10-22 11:46:58.269	54514	56036	57892	56773
2014-10-22 11:46:58.275	54498	56030	57864	56744
2014-10-22 11:46:58.279	54518	56014	57851	56713
2014-10-22 11:46:58.285	54492	56047	57840	56733
2014-10-22 11:46:58.289	54503	56022	57849	56772
2014-10-22 11:46:58.295	54531	56022	57851	56776
2014-10-22 11:46:58.299	54539	56051	57875	56748
2014-10-22 11:46:58.305	54529	56039	57885	56694
2014-10-22 11:46:58.309	54505	56050	57858	56631
2014-10-22 11:46:58.315	54546	56036	57850	56567
2014-10-22 11:46:58.319	54537	56046	57862	56514
2014-10-22 11:46:58.325	54513	56035	57876	56526
2014-10-22 11:46:58.329	54544	56023	57853	56626
2014-10-22 11:46:58.335	54532	56061	57831	56750
2014-10-22 11:46:58.339	54532	56034	57852	56830
2014-10-22 11:46:58.345	54525	56037	57857	56889
2014-10-22 11:46:58.349	54507	56060	57845	56922
2014-10-22 11:46:58.355	54547	56039	57839	56925
2014-10-22 11:46:58.359	54541	56049	57823	56920
2014-10-22 11:46:58.365	54517	56038	57841	56895
2014-10-22 11:46:58.369	54530	56044	57862	56829
2014-10-22 11:46:58.375	54544	56056	57836	56769
2014-10-22 11:46:58.380	54560	56036	57850	56746
2014-10-22 11:46:58.384	54540	56052	57888	56693
2014-10-22 11:46:58.390	54532	56062	57867	56641
2014-10-22 11:46:58.394	54554	56046	57858	56616
2014-10-22 11:46:58.400	54549	56029	57883	56647
2014-10-22 11:46:58.404	54548	56070	57883	56701
2014-10-22 11:46:58.410	54555	56068	57893	56718
2014-10-22 11:46:58.414	54538	56040	57876	56749
2014-10-22 11:46:58.420	54537	56097	57834	56756
2014-10-22 11:46:58.424	54555	56063	57855	56768
2014-10-22 11:46:58.430	54542	56047	57867	56783
2014-10-22 11:46:58.434	54529	56086	57851	56771
2014-10-22 11:46:58.440	54538	56068	57856	56758
2014-10-22 11:46:58.444	54544	56080	57899	56715
2014-10-22 11:46:58.450	54532	56078	57854	56732
2014-10-22 11:46:58.454	54515	56070	57799	56779
2014-10-22 11:46:58.460	54549	56081	57909	56774
2014-10-22 11:46:58.464	54573	56058	57913	56747
2014-10-22 11:46:58.470	54536	56058	57822	56755
2014-10-22 11:46:58.474	54532	56082	57819	56804
2014-10-22 11:46:58.480	54579	56083	57891	56800
2014-10-22 11:46:58.484	54576	56089	57915	56793
2014-10-22 11:46:58.490	54556	56076	57812	56816
2014-10-22 11:46:58.494	54567	56082	57852	56802
2014-10-22 11:46:58.500	54549	56100	57942	56818
2014-10-22 11:46:58.505	54560	56074	57896	56832
2014-10-22 11:46:58.509	54596	56085	57900	56791
2014-10-22 11:46:58.515	54564	56095	57963	56759
2014-10-22 11:46:58.519	54561	56083	57937	56756
2014-10-22 11:46:58.525	54599	56091	57882	56745
2014-10-22 11:46:58.529	54565	56103	57891	56712
2014-10-22 11:46:58.535	54560	56100	57900	56712
2014-10-22 11:46:58.539	54598	56101	57892	56734
2014-10-22 11:46:58.545	54569	56097	57875	56763
2014-10-22 11:46:58.549	54587	56064	57875	56778
2014-10-22 11:46:58.555	54583	56099	57885	56756
2014-10-22 11:46:58.559	54551	56126	57855	56787
2014-10-22 11:46:58.565	54571	56089	57861	56828
2014-10-22 11:46:58.569	54569	56102	57904	56862
2014-10-22 11:46:58.575	54616	56117	57901	56878
2014-10-22 11:46:58.579	54580	56109	57886	56861
2014-10-22 11:46:58.585	54559	56098	57890	56904
2014-10-22 11:46:58.589	54617	56117	57901	56901
2014-10-22 11:46:58.595	54583	56111	57910	56843
2014-10-22 11:46:58.599	54609	56100	57885	56827
2014-10-22 11:46:58.605	54580	56132	57880	56782
2014-10-22 11:46:58.609	54579	56111	57943	56728
2014-10-22 11:46:58.615	54638	56116	57961	56681
2014-10-22 11:46:58.619	54585	56126	57934	56634
2014-10-22 11:46:58.625	54605	56126	57941	56635
2014-10-22 11:46:58.630	54619	56128	57933	56678
2014-10-22 11:46:58.634	54609	56107	57924	56734
2014-10-22 11:46:58.640	54614	56121	57920	56801
2014-10-22 11:46:58.644	54597	56125	57889	56901
2014-10-22 11:46:58.650	54620	56130	57904	56955
2014-10-22 11:46:58.654	54617	56129	57892	56947
2014-10-22 11:46:58.660	54607	56132	57857	56938
2014-10-22 11:46:58.664	54613	56139	57875	56927
2014-10-22 11:46:58.670	54596	56121	57869	56951
2014-10-22 11:46:58.674	54587	56149	57892	56946
2014-10-22 11:46:58.680	54638	56139	57911	56922
2014-10-22 11:46:58.684	54646	56128	57885	56918
2014-10-22 11:46:58.690	54605	56158	57909	56867
2014-10-22 11:46:58.694	54628	56158	57933	56790
2014-10-22 11:46:58.700	54624	56155	57930	56680
2014-10-22 11:46:58.704	54627	56137	57915	56627
2014-10-22 11:46:58.710	54660	56151	57906	56653
2014-10-22 11:46:58.714	54618	56153	57906	56680
2014-10-22 11:46:58.720	54603	56149	57900	56738
2014-10-22 11:46:58.724	54662	56161	57929	56763
2014-10-22 11:46:58.730	54653	56132	57967	56814
2014-10-22 11:46:58.734	54611	56151	57963	56903
2014-10-22 11:46:58.740	54629	56167	57934	56893
2014-10-22 11:46:58.744	54647	56150	57932	56892
2014-10-22 11:46:58.750	54644	56169	57979	56932
2014-10-22 11:46:58.755	54615	56167	57992	56929
2014-10-22 11:46:58.759	54645	56160	57972	56950
2014-10-22 11:46:58.765	54685	56154	57963	56941
2014-10-22 11:46:58.769	54621	56145	57967	56887
2014-10-22 11:46:58.775	54655	56170	57971	56900
2014-10-22 11:46:58.779	54687	56171	57939	56891
2014-10-22 11:46:58.785	54641	56163	57949	56858
2014-10-22 11:46:58.789	54684	56167	57971	56830
2014-10-22 11:46:58.795	54678	56172	57943	56774
2014-10-22 11:46:58.799	54646	56173	57954	56778
2014-10-22 11:46:58.805	54663	56170	57979	56785
2014-10-22 11:46:58.809	54651	56190	57961	56766
2014-10-22 11:46:58.815	54659	56169	57948	56807
2014-10-22 11:46:58.819	54690	56156	57952	56855
2014-10-22 11:46:58.825	54662	56194	57967	56858
2014-10-22 11:46:58.829	54637	56202	57974	56845
2014-10-22 11:46:58.835	54679	56179	57948	56860
2014-10-22 11:46:58.839	54681	56183	57945	56884
2014-10-22 11:46:58.845	54673	56199	57965	56920
2014-10-22 11:46:58.849	54680	56185	57954	56954
2014-10-22 11:46:58.855	54655	56178	57937	56930
2014-10-22 11:46:58.859	54673	56183	57929	56893
2014-10-22 11:46:58.865	54694	56189	57927	56861
2014-10-22 11:46:58.869	54689	56176	57935	56839
2014-10-22 11:46:58.875	54681	56188	57955	56856
2014-10-22 11:46:58.880	54679	56209	57978	56889
2014-10-22 11:46:58.884	54669	56173	57988	56924
2014-10-22 11:46:58.890	54674	56201	58002	56925
2014-10-22 11:46:58.894	54717	56221	57991	56923
2014-10-22 11:46:58.900	54677	56186	57974	56939
2014-10-22 11:46:58.904	54665	56198	58005	56919
2014-10-22 11:46:58.910	54686	56204	58005	56892
2014-10-22 11:46:58.914	54661	56207	58002	56879
2014-10-22 11:46:58.920	54719	56214	58026	56869
2014-10-22 11:46:58.924	54711	56212	58017	56878
2014-10-22 11:46:58.930	54671	56216	58046	56885
2014-10-22 11:46:58.934	54687	56196	58036	56862
2014-10-22 11:46:58.940	54681	56212	57964	56827
2014-10-22 11:46:58.944	54723	56217	57944	56804
2014-10-22 11:46:58.950	54728	56193	57922	56820
2014-10-22 11:46:58.954	54673	56208	57922	56844
2014-10-22 11:46:58.960	54674	56229	57953	56852
2014-10-22 11:46:58.964	54713	56224	57967	56901
2014-10-22 11:46:58.970	54730	56203	57999	56965
2014-10-22 11:46:58.974	54706	56226	58014	56960
2014-10-22 11:46:58.980	54683	56224	58019	56933
2014-10-22 11:46:58.984	54699	56193	58049	56933
2014-10-22 11:46:58.990	54711	56227	58046	56938
2014-10-22 11:46:58.994	54711	56237	58014	56964
2014-10-22 11:46:59.000	54727	56227	58004	56995
2014-10-22 11:46:59.005	54733	56238	57993	57004
2014-10-22 11:46:59.009	54713	56240	57991	56971
2014-10-22 11:46:59.015	54677	56231	57978	56872
2014-10-22 11:46:59.019	54713	56215	57954	56817
2014-10-22 11:46:59.025	54763	56228	57974	56795
2014-10-22 11:46:59.029	54717	56237	57987	56775
2014-10-22 11:46:59.035	54704	56231	57985	56819
2014-10-22 11:46:59.039	54727	56230	58006	56887
2014-10-22 11:46:59.045	54718	56238	58032	56960
2014-10-22 11:46:59.049	54735	56250	58027	56989
2014-10-22 11:46:59.055	54729	56227	58008	56992
2014-10-22 11:46:59.059	54723	56241	58020	56994
2014-10-22 11:46:59.065	54736	56265	58020	56944
2014-10-22 11:46:59.069	54728	56248	58012	56942
2014-10-22 11:46:59.075	54737	56244	58001	56971
2014-10-22 11:46:59.079	54749	56240	57985	56975
2014-10-22 11:46:59.085	54728	56257	57984	56991
2014-10-22 11:46:59.089	54705	56248	57970	57008
2014-10-22 11:46:59.095	54732	56242	57980	56999
2014-10-22 11:46:59.099	54746	56264	57974	56911
2014-10-22 11:46:59.105	54724	56246	57945	56840
2014-10-22 11:46:59.109	54737	56236	57952	56846
2014-10-22 11:46:59.115	54726	56249	57970	56857
2014-10-22 11:46:59.119	54736	56267	58007	56881
2014-10-22 11:46:59.125	54745	56263	58039	56901
2014-10-22 11:46:59.130	54725	56257	58025	56908
2014-10-22 11:46:59.134	54752	56288	58023	56916
2014-10-22 11:46:59.140	54730	56274	58055	56912
2014-10-22 11:46:59.144	54735	56241	58065	56910
2014-10-22 11:46:59.150	54759	56272	58064	56918
2014-10-22 11:46:59.154	54723	56290	58080	56963
2014-10-22 11:46:59.160	54748	56262	58074	57033
2014-10-22 11:46:59.164	54769	56252	58069	57073
2014-10-22 11:46:59.170	54756	56278	58076	57112
2014-10-22 11:46:59.174	54747	56281	58052	57109
2014-10-22 11:46:59.180	54733	56267	58030	57035
2014-10-22 11:46:59.184	54756	56270	58037	56981
2014-10-22 11:46:59.190	54771	56260	58044	56954
2014-10-22 11:46:59.194	54758	56274	58048	56914
2014-10-22 11:46:59.200	54736	56279	58036	56889
2014-10-22 11:46:59.204	54742	56268	58049	56907
2014-10-22 11:46:59.210	54782	56285	58068	56901
2014-10-22 11:46:59.214	54749	56271	58030	56872
2014-10-22 11:46:59.220	54723	56274	58034	56861
2014-10-22 11:46:59.224	54768	56281	58056	56845
2014-10-22 11:46:59.230	54767	56278	58017	56864
2014-10-22 11:46:59.234	54756	56283	58018	56888
2014-10-22 11:46:59.240	54742	56277	58048	56904
2014-10-22 11:46:59.244	54754	56285	58067	56962
2014-10-22 11:46:59.250	54786	56273	58078	57051
2014-10-22 11:46:59.255	54768	56269	58065	57091
2014-10-22 11:46:59.259	54761	56291	58049	57043
2014-10-22 11:46:59.265	54746	56300	58039	57021
2014-10-22 11:46:59.269	54759	56278	58031	57021
2014-10-22 11:46:59.275	54772	56284	58016	57009
2014-10-22 11:46:59.279	54739	56295	58014	57027
2014-10-22 11:46:59.285	54752	56279	58034	57002
2014-10-22 11:46:59.289	54769	56288	58020	56940
2014-10-22 11:46:59.295	54770	56284	58019	56893
2014-10-22 11:46:59.299	54768	56290	58053	56851
2014-10-22 11:46:59.305	54758	56301	58060	56857
2014-10-22 11:46:59.309	54764	56303	58075	56921
2014-10-22 11:46:59.315	54772	56306	58085	56972
2014-10-22 11:46:59.319	54773	56297	58093	56978
2014-10-22 11:46:59.325	54768	56305	58098	56970
2014-10-22 11:46:59.329	54772	56300	58074	56974
2014-10-22 11:46:59.335	54762	56303	58070	57009
2014-10-22 11:46:59.339	54769	56307	58072	57070
2014-10-22 11:46:59.345	54789	56307	58074	57093
2014-10-22 11:46:59.349	54771	56308	58053	57075
2014-10-22 11:46:59.355	54788	56294	58030	57061
2014-10-22 11:46:59.359	54783	56318	58063	57039
2014-10-22 11:46:59.365	54771	56319	58064	57017
2014-10-22 11:46:59.369	54788	56289	58058	56976
2014-10-22 11:46:59.375	54750	56298	58072	56913
2014-10-22 11:46:59.380	54773	56306	58049	56860
2014-10-22 11:46:59.384	54795	56309	58032	56838
2014-10-22 11:46:59.390	54767	56313	58063	56888
2014-10-22 11:46:59.394	54794	56306	58093	56955
2014-10-22 11:46:59.400	54800	56306	58074	56973
2014-10-22 11:46:59.404	54803	56317	58058	56977
2014-10-22 11:46:59.410	54788	56323	58046	56978
2014-10-22 11:46:59.414	54762	56315	58017	56971
2014-10-22 11:46:59.420	54792	56317	58001	56954
2014-10-22 11:46:59.424	54786	56327	57985	56950
2014-10-22 11:46:59.430	54784	56307	57989	56980
2014-10-22 11:46:59.434	54798	56302	58003	57033
2014-10-22 11:46:59.440	54770	56340	57999	57054
2014-10-22 11:46:59.444	54791	56320	58040	57071
2014-10-22 11:46:59.450	54797	56308	58083	57097
2014-10-22 11:46:59.454	54781	56338	58081	57069
2014-10-22 11:46:59.460	54801	56331	58102	57040
2014-10-22 11:46:59.464	54766	56313	58102	57014
2014-10-22 11:46:59.470	54774	56321	58103	56998
2014-10-22 11:46:59.474	54799	56351	58137	57003
2014-10-22 11:46:59.480	54779	56325	58126	56990
2014-10-22 11:46:59.484	54808	56316	58118	56960
2014-10-22 11:46:59.490	54795	56327	58103	56912
2014-10-22 11:46:59.494	54771	56313	58058	56911
2014-10-22 11:46:59.500	54788	56336	58076	56918
2014-10-22 11:46:59.505	54779	56330	58057	56905
2014-10-22 11:46:59.509	54785	56305	57990	56950
2014-10-22 11:46:59.515	54797	56319	58017	56986
2014-10-22 11:46:59.519	54789	56353	58066	57027
2014-10-22 11:46:59.525	54797	56327	58079	57074
2014-10-22 11:46:59.529	54803	56315	58113	57048
2014-10-22 11:46:59.535	54793	56342	58127	57020
2014-10-22 11:46:59.539	54805	56330	58108	57032
2014-10-22 11:46:59.545	54812	56337	58117	57036
2014-10-22 11:46:59.549	54780	56329	58109	57033
2014-10-22 11:46:59.555	54764	56339	58061	57062
2014-10-22 11:46:59.559	54784	56332	58059	57105
2014-10-22 11:46:59.565	54825	56311	58095	57102
2014-10-22 11:46:59.569	54804	56343	58117	57051
2014-10-22 11:46:59.575	54749	56324	58103	56971
2014-10-22 11:46:59.579	54803	56321	58099	56914
2014-10-22 11:46:59.585	54829	56342	58116	56912
2014-10-22 11:46:59.589	54791	56324	58101	56929
2014-10-22 11:46:59.595	54791	56326	58110	56960
2014-10-22 11:46:59.599	54796	56322	58125	56996
2014-10-22 11:46:59.605	54825	56317	58097	57003
2014-10-22 11:46:59.609	54800	56325	58076	56961
2014-10-22 11:46:59.615	54767	56326	58081	56922
2014-10-22 11:46:59.619	54810	56332	58083	56960
2014-10-22 11:46:59.625	54812	56314	58070	57004
2014-10-22 11:46:59.630	54809	56317	58082	57022
2014-10-22 11:46:59.634	54813	56343	58101	57075
2014-10-22 11:46:59.640	54778	56320	58094	57111
2014-10-22 11:46:59.644	54815	56302	58085	57111
2014-10-22 11:46:59.650	54842	56342	58056	57077
2014-10-22 11:46:59.654	54792	56350	58044	57041
2014-10-22 11:46:59.660	54797	56309	58049	57062
2014-10-22 11:46:59.664	54805	56333	58050	57052
2014-10-22 11:46:59.670	54810	56345	58084	57031
2014-10-22 11:46:59.674	54839	56332	58096	57031
2014-10-22 11:46:59.680	54790	56334	58060	56991
2014-10-22 11:46:59.684	54779	56320	58067	56937
2014-10-22 11:46:59.690	54830	56324	58087	56895
2014-10-22 11:46:59.694	54803	56324	58074	56893
2014-10-22 11:46:59.700	54780	56339	58095	56882
2014-10-22 11:46:59.704	54806	56337	58107	56865
2014-10-22 11:46:59.710	54826	56314	58080	56934
2014-10-22 11:46:59.714	54825	56330	58088	57010
2014-10-22 11:46:59.720	54794	56338	58096	57063
2014-10-22 11:46:59.724	54800	56340	58079	57140
2014-10-22 11:46:59.730	54819	56331	58097	57188
2014-10-22 11:46:59.734	54804	56336	58121	57189
2014-10-22 11:46:59.740	54815	56358	58097	57155
2014-10-22 11:46:59.744	54823	56333	58085	57115
2014-10-22 11:46:59.750	54808	56350	58093	57108
2014-10-22 11:46:59.755	54795	56352	58091	57062
2014-10-22 11:46:59.759	54805	56318	58092	57009
2014-10-22 11:46:59.765	54820	56332	58089	56999
2014-10-22 11:46:59.769	54805	56323	58094	56955
2014-10-22 11:46:59.775	54797	56325	58085	56913
2014-10-22 11:46:59.779	54783	56331	58064	56890
2014-10-22 11:46:59.785	54817	56323	58075	56906
2014-10-22 11:46:59.789	54833	56345	58100	56918
2014-10-22 11:46:59.795	54753	56315	58104	56930
2014-10-22 11:46:59.799	54810	56310	58088	57008
2014-10-22 11:46:59.805	54847	56347	58100	57030
2014-10-22 11:46:59.809	54779	56326	58104	57006
2014-10-22 11:46:59.815	54821	56328	58051	56999
2014-10-22 11:46:59.819	54815	56334	58030	57031
2014-10-22 11:46:59.825	54793	56315	58053	57125
2014-10-22 11:46:59.829	54810	56325	58055	57176
2014-10-22 11:46:59.835	54793	56329	58073	57167
2014-10-22 11:46:59.839	54813	56330	58106	57145
2014-10-22 11:46:59.845	54822	56333	58108	57109
2014-10-22 11:46:59.849	54787	56326	58118	57057
2014-10-22 11:46:59.855	54782	56318	58126	57017
2014-10-22 11:46:59.859	54823	56327	58126	57004
2014-10-22 11:46:59.865	54809	56334	58119	57001
2014-10-22 11:46:59.869	54794	56314	58098	56987
2014-10-22 11:46:59.875	54816	56339	58100	56934
2014-10-22 11:46:59.880	54804	56339	58076	56902
2014-10-22 11:46:59.884	54827	56308	58075	56933
2014-10-22 11:46:59.890	54810	56337	58103	56938
2014-10-22 11:46:59.894	54784	56333	58087	56942
2014-10-22 11:46:59.900	54832	56331	58092	56985
2014-10-22 11:46:59.904	54822	56326	58096	56997
2014-10-22 11:46:59.910	54806	56293	58105	57041
2014-10-22 11:46:59.914	54815	56328	58121	57079
2014-10-22 11:46:59.920	54799	56358	58106	57069
2014-10-22 11:46:59.924	54827	56316	58127	57094
2014-10-22 11:46:59.930	54832	56308	58155	57085
2014-10-22 11:46:59.934	54792	56344	58158	57074
2014-10-22 11:46:59.940	54839	56316	58141	57085
2014-10-22 11:46:59.944	54853	56303	58119	57084
2014-10-22 11:46:59.950	54785	56336	58140	57096
2014-10-22 11:46:59.954	54792	56326	58128	57073
2014-10-22 11:46:59.960	54810	56315	58093	57046
2014-10-22 11:46:59.964	54849	56334	58121	56987
2014-10-22 11:46:59.970	54820	56327	58137	56918
2014-10-22 11:46:59.974	54762	56314	58106	56911
2014-10-22 11:46:59.980	54849	56324	58113	56919
2014-10-22 11:46:59.984	54828	56318	58129	56950
2014-10-22 11:46:59.990	54798	56328	58123	56966
2014-10-22 11:46:59.994	54830	56324	58129	56973
2014-10-22 11:47:00.000	54803	56313	58111	57045
2014-10-22 11:47:00.005	54833	56330	58129	57101
2014-10-22 11:47:00.009	54798	56315	58162	57065
2014-10-22 11:47:00.015	54782	56317	58119	57042
2014-10-22 11:47:00.019	54839	56311	58103	57051
2014-10-22 11:47:00.025	54833	56307	58119	57068
2014-10-22 11:47:00.029	54823	56321	58112	57083
2014-10-22 11:47:00.035	54794	56304	58102	57041
2014-10-22 11:47:00.039	54797	56323	58100	57006
2014-10-22 11:47:00.045	54834	56316	58108	57028
2014-10-22 11:47:00.049	54811	56300	58109	57079
2014-10-22 11:47:00.055	54808	56330	58113	57084
2014-10-22 11:47:00.059	54815	56328	58081	57065
2014-10-22 11:47:00.065	54806	56315	58065	57065
2014-10-22 11:47:00.069	54843	56308	58119	57037
2014-10-22 11:47:00.075	54834	56312	58124	57043
2014-10-22 11:47:00.079	54800	56330	58102	57044
2014-10-22 11:47:00.085	54821	56322	58118	57020
2014-10-22 11:47:00.089	54840	56297	58116	56984
2014-10-22 11:47:00.095	54826	56298	58082	56942
2014-10-22 11:47:00.099	54809	56317	58055	56944
2014-10-22 11:47:00.105	54814	56314	58072	56925
2014-10-22 11:47:00.109	54799	56294	58095	56918
2014-10-22 11:47:00.115	54813	56317	58083	56950
2014-10-22 11:47:00.119	54797	56335	58093	56985
2014-10-22 11:47:00.125	54789	56282	58116	57068
2014-10-22 11:47:00.130	54851	56298	58124	57124
2014-10-22 11:47:00.134	54787	56326	58144	57110
2014-10-22 11:47:00.140	54797	56298	58129	57099
2014-10-22 11:47:00.144	54858	56316	58117	57093
2014-10-22 11:47:00.150	54797	56310	58135	57092
2014-10-22 11:47:00.154	54811	56298	58114	57053
2014-10-22 11:47:00.160	54827	56300	58103	56989
2014-10-22 11:47:00.164	54811	56306	58108	56999
2014-10-22 11:47:00.170	54836	56314	58123	57040
2014-10-22 11:47:00.174	54818	56292	58147	57044
2014-10-22 11:47:00.180	54795	56310	58119	56968
2014-10-22 11:47:00.184	54834	56316	58083	56891
2014-10-22 11:47:00.190	54839	56298	58096	56923
2014-10-22 11:47:00.194	54806	56302	58128	56983
2014-10-22 11:47:00.200	54806	56297	58133	57025
2014-10-22 11:47:00.204	54798	56332	58124	57033
2014-10-22 11:47:00.210	54801	56327	58123	57048
2014-10-22 11:47:00.214	54823	56273	58113	57099
2014-10-22 11:47:00.220	54822	56320	58099	57075
2014-10-22 11:47:00.224	54781	56341	58092	57030
2014-10-22 11:47:00.230	54794	56270	58092	57031
2014-10-22 11:47:00.234	54829	56278	58076	57061
2014-10-22 11:47:00.240	54803	56331	58054	57086
2014-10-22 11:47:00.244	54817	56310	58084	57061
2014-10-22 11:47:00.250	54812	56281	58097	57075
2014-10-22 11:47:00.255	54785	56302	58074	57089
2014-10-22 11:47:00.259	54813	56314	58092	57040
2014-10-22 11:47:00.265	54840	56295	58123	56965
2014-10-22 11:47:00.269	54814	56300	58109	56917
2014-10-22 11:47:00.275	54781	56327	58081	56956
2014-10-22 11:47:00.279	54809	56311	58132	56931
2014-10-22 11:47:00.285	54823	56293	58136	56880
2014-10-22 11:47:00.289	54827	56303	58078	56934
2014-10-22 11:47:00.295	54784	56312	58145	56979
2014-10-22 11:47:00.299	54767	56309	58167	56999
2014-10-22 11:47:00.305	54840	56319	58106	57020
2014-10-22 11:47:00.309	54810	56325	58121	57040
2014-10-22 11:47:00.315	54784	56291	58123	57089
2014-10-22 11:47:00.319	54804	56302	58098	57136
2014-10-22 11:47:00.325	54785	56317	58089	57139
2014-10-22 11:47:00.329	54826	56293	58080	57130
2014-10-22 11:47:00.335	54827	56284	58091	57106
2014-10-22 11:47:00.339	54790	56298	58118	57049
2014-10-22 11:47:00.345	54814	56316	58123	57016
2014-10-22 11:47:00.349	54810	56289	58111	56993
2014-10-22 11:47:00.355	54805	56291	58135	56977
2014-10-22 11:47:00.359	54804	56323	58179	56986
2014-10-22 11:47:00.365	54807	56314	58202	56991
2014-10-22 11:47:00.369	54792	56291	58174	57020
2014-10-22 11:47:00.375	54758	56293	58157	57033
2014-10-22 11:47:00.380	54823	56312	58134	56989
2014-10-22 11:47:00.384	54805	56298	58083	56950
2014-10-22 11:47:00.390	54770	56299	58124	56947
2014-10-22 11:47:00.394	54827	56298	58105	56953
2014-10-22 11:47:00.400	54790	56296	58049	56964
2014-10-22 11:47:00.404	54806	56315	58093	56989
2014-10-22 11:47:00.410	54803	56283	58099	56972
2014-10-22 11:47:00.414	54774	56288	58105	56988
2014-10-22 11:47:00.420	54825	56307	58093	57082
2014-10-22 11:47:00.424	54802	56280	58060	57134
2014-10-22 11:47:00.430	54799	56280	58094	57097
2014-10-22 11:47:00.434	54799	56294	58117	57066
2014-10-22 11:47:00.440	54788	56296	58120	57072
2014-10-22 11:47:00.444	54823	56286	58108	57035
2014-10-22 11:47:00.450	54811	56285	58138	56994
2014-10-22 11:47:00.454	54781	56288	58186	56976
2014-10-22 11:47:00.460	54774	56289	58161	56961
2014-10-22 11:47:00.464	54829	56288	58124	56987
2014-10-22 11:47:00.470	54836	56276	58129	57020
2014-10-22 11:47:00.474	54765	56286	58150	57006
2014-10-22 11:47:00.480	54769	56282	58117	56983
2014-10-22 11:47:00.484	54823	56281	58103	56953
2014-10-22 11:47:00.490	54827	56297	58102	56894
2014-10-22 11:47:00.494	54778	56276	58063	56913
2014-10-22 11:47:00.500	54780	56266	58108	56929
2014-10-22 11:47:00.505	54811	56289	58117	56890
2014-10-22 11:47:00.509	54825	56286	58074	56951
2014-10-22 11:47:00.515	54785	56265	58100	57038
2014-10-22 11:47:00.519	54765	56279	58076	57105
2014-10-22 11:47:00.525	54807	56291	58076	57121
2014-10-22 11:47:00.529	54794	56268	58117	57058
2014-10-22 11:47:00.535	54813	56275	58078	57056
2014-10-22 11:47:00.539	54788	56279	58075	57068
2014-10-22 11:47:00.545	54753	56273	58107	57023
2014-10-22 11:47:00.549	54801	56294	58120	57017
2014-10-22 11:47:00.555	54800	56265	58111	57057
2014-10-22 11:47:00.559	54809	56250	58109	57070
2014-10-22 11:47:00.565	54789	56287	58127	57061
2014-10-22 11:47:00.569	54786	56269	58093	57011
2014-10-22 11:47:00.575	54795	56252	58115	56944
2014-10-22 11:47:00.579	54764	56275	58137	56893
2014-10-22 11:47:00.585	54798	56289	58109	56838
2014-10-22 11:47:00.589	54776	56280	58144	56879
2014-10-22 11:47:00.595	54776	56264	58139	56928
2014-10-22 11:47:00.599	54784	56272	58131	56928
2014-10-22 11:47:00.605	54727	56278	58139	57021
2014-10-22 11:47:00.609	54794	56277	58107	57092
2014-10-22 11:47:00.615	54819	56257	58114	57047
2014-10-22 11:47:00.619	54779	56254	58125	56979
2014-10-22 11:47:00.625	54783	56276	58120	56960
2014-10-22 11:47:00.630	54753	56250	58100	56966
2014-10-22 11:47:00.634	54763	56251	58070	56964
2014-10-22 11:47:00.640	54798	56276	58099	56985
2014-10-22 11:47:00.644	54823	56272	58092	56972
2014-10-22 11:47:00.650	54782	56254	58066	56947
2014-10-22 11:47:00.654	54731	56256	58125	56994
2014-10-22 11:47:00.660	54762	56285	58148	57061
2014-10-22 11:47:00.664	54791	56264	58134	57089
2014-10-22 11:47:00.670	54797	56253	58109	57047
2014-10-22 11:47:00.674	54760	56276	58083	56995
2014-10-22 11:47:00.680	54754	56279	58109	56992
2014-10-22 11:47:00.684	54757	56259	58113	56969
2014-10-22 11:47:00.690	54776	56247	58108	56942
2014-10-22 11:47:00.694	54790	56269	58092	57000
2014-10-22 11:47:00.700	54762	56261	58080	57060
2014-10-22 11:47:00.704	54790	56248	58104	57018
2014-10-22 11:47:00.710	54748	56265	58083	56978
2014-10-22 11:47:00.714	54759	56270	58082	56937
2014-10-22 11:47:00.720	54788	56242	58106	56847
2014-10-22 11:47:00.724	54755	56231	58129	56838
2014-10-22 11:47:00.730	54792	56276	58143	56885
2014-10-22 11:47:00.734	54758	56268	58112	56932
2014-10-22 11:47:00.740	54792	56235	58101	56961
2014-10-22 11:47:00.744	54789	56250	58092	56960
2014-10-22 11:47:00.750	54738	56267	58085	57006
2014-10-22 11:47:00.755	54792	56266	58076	57040
2014-10-22 11:47:00.759	54769	56244	58081	57061
2014-10-22 11:47:00.765	54799	56253	58121	57124
2014-10-22 11:47:00.769	54766	56269	58102	57116
2014-10-22 11:47:00.775	54740	56250	58085	57078
2014-10-22 11:47:00.779	54799	56254	58109	57058
2014-10-22 11:47:00.785	54753	56261	58099	57010
2014-10-22 11:47:00.789	54781	56249	58098	56996
2014-10-22 11:47:00.795	54750	56238	58112	56968
2014-10-22 11:47:00.799	54751	56255	58122	56899
2014-10-22 11:47:00.805	54796	56267	58112	56876
2014-10-22 11:47:00.809	54739	56238	58087	56861
2014-10-22 11:47:00.815	54797	56252	58112	56831
2014-10-22 11:47:00.819	54773	56271	58139	56855
2014-10-22 11:47:00.825	54744	56248	58109	56934
2014-10-22 11:47:00.829	54787	56231	58078	56984
2014-10-22 11:47:00.835	54777	56242	58079	56981
2014-10-22 11:47:00.839	54799	56261	58089	56954
2014-10-22 11:47:00.845	54729	56236	58072	56941
2014-10-22 11:47:00.849	54749	56233	58060	56954
2014-10-22 11:47:00.855	54833	56241	58073	57023
2014-10-22 11:47:00.859	54764	56222	58080	57115
2014-10-22 11:47:00.865	54750	56231	58087	57125
2014-10-22 11:47:00.869	54756	56229	58105	57105
2014-10-22 11:47:00.875	54752	56248	58110	57038
2014-10-22 11:47:00.880	54807	56246	58111	56961
2014-10-22 11:47:00.884	54775	56210	58103	56961
2014-10-22 11:47:00.890	54718	56238	58094	56956
2014-10-22 11:47:00.894	54752	56251	58091	56955
2014-10-22 11:47:00.900	54770	56218	58076	56950
2014-10-22 11:47:00.904	54769	56227	58068	56942
2014-10-22 11:47:00.910	54772	56245	58042	56928
2014-10-22 11:47:00.914	54725	56237	58038	56879
2014-10-22 11:47:00.920	54749	56231	58044	56837
2014-10-22 11:47:00.924	54815	56232	58020	56822
2014-10-22 11:47:00.930	54762	56257	58049	56875
2014-10-22 11:47:00.934	54750	56251	58068	56936
2014-10-22 11:47:00.940	54773	56227	58063	56944
2014-10-22 11:47:00.944	54767	56247	58084	56942
2014-10-22 11:47:00.950	54770	56252	58080	57004
2014-10-22 11:47:00.954	54733	56228	58074	57108
2014-10-22 11:47:00.960	54780	56242	58086	57105
2014-10-22 11:47:00.964	54794	56257	58116	57033
2014-10-22 11:47:00.970	54746	56226	58138	56998
2014-10-22 11:47:00.974	54768	56214	58124	57011
2014-10-22 11:47:00.980	54729	56242	58119	57077
2014-10-22 11:47:00.984	54746	56230	58106	57096
2014-10-22 11:47:00.990	54802	56219	58082	57056
2014-10-22 11:47:00.994	54775	56247	58075	57013
2014-10-22 11:47:01.000	54760	56232	58070	56920
2014-10-22 11:47:01.005	54726	56218	58064	56861
2014-10-22 11:47:01.009	54756	56237	58079	56850
2014-10-22 11:47:01.015	54803	56244	58087	56776
2014-10-22 11:47:01.019	54755	56240	58079	56758
2014-10-22 11:47:01.025	54745	56224	58103	56809
2014-10-22 11:47:01.029	54757	56227	58108	56812
2014-10-22 11:47:01.035	54758	56235	58092	56866
2014-10-22 11:47:01.039	54773	56225	58111	56964
2014-10-22 11:47:01.045	54758	56234	58096	57026
2014-10-22 11:47:01.049	54744	56239	58083	57039
2014-10-22 11:47:01.055	54755	56223	58097	57036
2014-10-22 11:47:01.059	54754	56233	58065	57115
2014-10-22 11:47:01.065	54781	56247	58051	57152
2014-10-22 11:47:01.069	54770	56231	58061	57096
2014-10-22 11:47:01.075	54701	56219	58053	57077
2014-10-22 11:47:01.079	54760	56242	58061	57056
2014-10-22 11:47:01.085	54796	56243	58050	57031
2014-10-22 11:47:01.089	54753	56222	58047	56983
2014-10-22 11:47:01.095	54738	56237	58068	56904
2014-10-22 11:47:01.099	54719	56232	58084	56852
2014-10-22 11:47:01.105	54773	56235	58103	56836
2014-10-22 11:47:01.109	54780	56253	58091	56862
2014-10-22 11:47:01.115	54732	56230	58085	56853
2014-10-22 11:47:01.119	54727	56220	58083	56818
2014-10-22 11:47:01.125	54750	56226	58090	56829
2014-10-22 11:47:01.130	54798	56222	58111	56857
2014-10-22 11:47:01.134	54736	56233	58095	56867
2014-10-22 11:47:01.140	54689	56245	58092	56887
2014-10-22 11:47:01.144	54758	56232	58082	56965
2014-10-22 11:47:01.150	54751	56224	58066	57032
2014-10-22 11:47:01.154	54750	56230	58050	57055
2014-10-22 11:47:01.160	54750	56225	58027	57096
2014-10-22 11:47:01.164	54696	56215	58077	57113
2014-10-22 11:47:01.170	54792	56217	58101	57079
2014-10-22 11:47:01.174	54796	56231	58058	57035
2014-10-22 11:47:01.180	54670	56234	58054	56990
2014-10-22 11:47:01.184	54737	56224	58063	56935
2014-10-22 11:47:01.190	54757	56236	58065	56903
2014-10-22 11:47:01.194	54743	56238	58092	56923
2014-10-22 11:47:01.200	54784	56202	58086	56932
2014-10-22 11:47:01.204	54736	56219	58068	56900
2014-10-22 11:47:01.210	54724	56242	58085	56904
2014-10-22 11:47:01.214	54752	56199	58067	56913
2014-10-22 11:47:01.220	54758	56204	58040	56856
2014-10-22 11:47:01.224	54740	56238	58049	56825
2014-10-22 11:47:01.230	54752	56226	58039	56840
2014-10-22 11:47:01.234	54746	56202	58015	56832
2014-10-22 11:47:01.240	54709	56202	58022	56873
2014-10-22 11:47:01.244	54745	56224	58030	56955
2014-10-22 11:47:01.250	54753	56213	58024	57027
2014-10-22 11:47:01.255	54732	56199	58052	57064
2014-10-22 11:47:01.259	54738	56224	58080	57027
2014-10-22 11:47:01.265	54747	56218	58065	57012
2014-10-22 11:47:01.269	54734	56197	58057	57022
2014-10-22 11:47:01.275	54746	56218	58039	56995
2014-10-22 11:47:01.279	54749	56230	58012	56982
2014-10-22 11:47:01.285	54731	56208	58049	57001
2014-10-22 11:47:01.289	54783	56189	58092	56965
2014-10-22 11:47:01.295	54755	56206	58092	56912
2014-10-22 11:47:01.299	54719	56234	58092	56911
2014-10-22 11:47:01.305	54761	56214	58098	56874
2014-10-22 11:47:01.309	54769	56203	58114	56847
2014-10-22 11:47:01.315	54751	56224	58081	56833
2014-10-22 11:47:01.319	54719	56211	58028	56844
2014-10-22 11:47:01.325	54758	56193	58039	56893
2014-10-22 11:47:01.329	54747	56208	58026	56903
2014-10-22 11:47:01.335	54710	56219	58003	56934
2014-10-22 11:47:01.339	54748	56214	58011	56957
2014-10-22 11:47:01.345	54705	56207	57997	56938
2014-10-22 11:47:01.349	54742	56211	58000	56925
2014-10-22 11:47:01.355	54793	56202	58011	56919
2014-10-22 11:47:01.359	54669	56193	58016	56940
2014-10-22 11:47:01.365	54698	56202	58051	56993
2014-10-22 11:47:01.369	54789	56189	58050	57052
2014-10-22 11:47:01.375	54748	56187	58062	57066
2014-10-22 11:47:01.380	54697	56192	58110	57021
2014-10-22 11:47:01.384	54675	56182	58088	56967
2014-10-22 11:47:01.390	54778	56178	58075	56929
2014-10-22 11:47:01.394	54785	56188	58057	56884
2014-10-22 11:47:01.400	54718	56198	58023	56843
2014-10-22 11:47:01.404	54717	56192	58061	56819
2014-10-22 11:47:01.410	54694	56207	58070	56842
2014-10-22 11:47:01.414	54775	56205	58084	56819
2014-10-22 11:47:01.420	54767	56200	58094	56761
2014-10-22 11:47:01.424	54707	56205	58055	56854
2014-10-22 11:47:01.430	54706	56186	58093	56964
2014-10-22 11:47:01.434	54715	56197	58090	56953
2014-10-22 11:47:01.440	54778	56197	58033	56951
2014-10-22 11:47:01.444	54698	56175	58071	57018
2014-10-22 11:47:01.450	54664	56191	58070	57075
2014-10-22 11:47:01.454	54744	56201	58042	57043
2014-10-22 11:47:01.460	54728	56189	58074	57008
2014-10-22 11:47:01.464	54694	56188	58029	57019
2014-10-22 11:47:01.470	54711	56212	58000	56990
2014-10-22 11:47:01.474	54742	56203	58045	56943
2014-10-22 11:47:01.480	54700	56172	58021	56903
2014-10-22 11:47:01.484	54682	56182	58018	56844
2014-10-22 11:47:01.490	54713	56188	58052	56830
2014-10-22 11:47:01.494	54737	56174	58050	56836
2014-10-22 11:47:01.500	54765	56177	58075	56778
2014-10-22 11:47:01.505	54729	56194	58072	56736
2014-10-22 11:47:01.509	54656	56179	58069	56742
2014-10-22 11:47:01.515	54664	56170	58107	56768
2014-10-22 11:47:01.519	54788	56184	58078	56814
2014-10-22 11:47:01.525	54759	56166	58061	56856
2014-10-22 11:47:01.529	54635	56169	58078	56929
2014-10-22 11:47:01.535	54661	56173	58062	57016
2014-10-22 11:47:01.539	54720	56175	58069	57018
2014-10-22 11:47:01.545	54779	56178	58041	57005
2014-10-22 11:47:01.549	54725	56147	58004	57021
2014-10-22 11:47:01.555	54667	56165	58014	56997
2014-10-22 11:47:01.559	54705	56179	58001	57024
2014-10-22 11:47:01.565	54699	56152	58012	57074
2014-10-22 11:47:01.569	54753	56154	58013	57053
2014-10-22 11:47:01.575	54710	56165	58032	56976
2014-10-22 11:47:01.579	54660	56164	58075	56865
2014-10-22 11:47:01.585	54728	56151	58012	56830
2014-10-22 11:47:01.589	54704	56160	57996	56787
2014-10-22 11:47:01.595	54734	56161	58045	56729
2014-10-22 11:47:01.599	54704	56143	58039	56722
2014-10-22 11:47:01.605	54676	56145	58027	56712
2014-10-22 11:47:01.609	54746	56154	58030	56767
2014-10-22 11:47:01.615	54683	56150	58037	56817
2014-10-22 11:47:01.619	54688	56148	58027	56836
2014-10-22 11:47:01.625	54714	56153	58030	56864
2014-10-22 11:47:01.630	54716	56149	58045	56905
2014-10-22 11:47:01.634	54702	56148	58029	56953
2014-10-22 11:47:01.640	54642	56154	57997	56968
2014-10-22 11:47:01.644	54695	56133	57980	57022
2014-10-22 11:47:01.650	54730	56136	58029	57054
2014-10-22 11:47:01.654	54737	56164	58043	57024
2014-10-22 11:47:01.660	54685	56144	57984	56999
2014-10-22 11:47:01.664	54665	56137	58016	56956
2014-10-22 11:47:01.670	54717	56144	58061	56954
2014-10-22 11:47:01.674	54687	56146	58039	56933
2014-10-22 11:47:01.680	54696	56145	58058	56849
2014-10-22 11:47:01.684	54688	56144	58052	56787
2014-10-22 11:47:01.690	54704	56164	58026	56716
2014-10-22 11:47:01.694	54700	56155	58018	56710
2014-10-22 11:47:01.700	54665	56130	57987	56763
2014-10-22 11:47:01.704	54708	56134	58004	56808
2014-10-22 11:47:01.710	54660	56148	58036	56862
2014-10-22 11:47:01.714	54674	56134	58031	56858
2014-10-22 11:47:01.720	54697	56136	58039	56856
2014-10-22 11:47:01.724	54657	56156	58046	56884
2014-10-22 11:47:01.730	54725	56145	58037	56859
2014-10-22 11:47:01.734	54693	56142	58027	56849
2014-10-22 11:47:01.740	54656	56140	58016	56894
2014-10-22 11:47:01.744	54705	56140	58013	56963
2014-10-22 11:47:01.750	54694	56126	58042	57015
2014-10-22 11:47:01.755	54693	56118	58050	57007
2014-10-22 11:47:01.759	54662	56137	58010	56999
2014-10-22 11:47:01.765	54657	56121	58001	56961
2014-10-22 11:47:01.769	54710	56117	57997	56874
2014-10-22 11:47:01.775	54692	56133	57998	56818
2014-10-22 11:47:01.779	54651	56122	58016	56738
2014-10-22 11:47:01.785	54647	56128	58000	56724
2014-10-22 11:47:01.789	54683	56121	57992	56822
2014-10-22 11:47:01.795	54712	56107	58018	56865
2014-10-22 11:47:01.799	54691	56125	58040	56889
2014-10-22 11:47:01.805	54648	56126	58035	56890
2014-10-22 11:47:01.809	54633	56136	58034	56832
2014-10-22 11:47:01.815	54692	56115	58031	56804
2014-10-22 11:47:01.819	54725	56103	58016	56804
2014-10-22 11:47:01.825	54632	56135	58036	56823
2014-10-22 11:47:01.829	54610	56126	58026	56854
2014-10-22 11:47:01.835	54716	56108	58004	56869
2014-10-22 11:47:01.839	54671	56101	57995	56815
2014-10-22 11:47:01.845	54612	56129	57988	56752
2014-10-22 11:47:01.849	54685	56116	58004	56808
2014-10-22 11:47:01.855	54660	56102	57984	56884
2014-10-22 11:47:01.859	54685	56111	57979	56906
2014-10-22 11:47:01.865	54691	56106	57974	56943
2014-10-22 11:47:01.869	54576	56116	57961	57013
2014-10-22 11:47:01.875	54641	56094	57995	57033
2014-10-22 11:47:01.880	54716	56110	58005	56980
2014-10-22 11:47:01.884	54675	56108	58003	56958
2014-10-22 11:47:01.890	54654	56097	58017	56833
2014-10-22 11:47:01.894	54611	56117	58020	56704
2014-10-22 11:47:01.900	54654	56097	57995	56731
2014-10-22 11:47:01.904	54742	56098	57992	56740
2014-10-22 11:47:01.910	54635	56098	58000	56796
2014-10-22 11:47:01.914	54576	56102	57987	56831
2014-10-22 11:47:01.920	54703	56103	58004	56785
2014-10-22 11:47:01.924	54684	56108	58006	56780
2014-10-22 11:47:01.930	54638	56109	58015	56773
2014-10-22 11:47:01.934	54609	56098	58012	56803
2014-10-22 11:47:01.940	54594	56100	57967	56852
2014-10-22 11:47:01.944	54714	56089	57950	56880
2014-10-22 11:47:01.950	54642	56108	57936	56882
2014-10-22 11:47:01.954	54600	56095	57991	56876
2014-10-22 11:47:01.960	54674	56080	58029	56865
2014-10-22 11:47:01.964	54591	56104	57992	56857
2014-10-22 11:47:01.970	54637	56097	58044	56913
2014-10-22 11:47:01.974	54688	56106	58050	56932
2014-10-22 11:47:01.980	54636	56104	57989	56886
2014-10-22 11:47:01.984	54634	56104	57967	56860
2014-10-22 11:47:01.990	54618	56107	57944	56840
2014-10-22 11:47:01.994	54652	56094	57966	56805
2014-10-22 11:47:02.000	54654	56100	57949	56808
2014-10-22 11:47:02.005	54608	56104	57910	56828
2014-10-22 11:47:02.009	54655	56096	57941	56787
2014-10-22 11:47:02.015	54643	56082	57945	56791
2014-10-22 11:47:02.019	54589	56100	57958	56800
2014-10-22 11:47:02.025	54660	56106	57973	56744
2014-10-22 11:47:02.029	54671	56099	57980	56740
2014-10-22 11:47:02.035	54585	56101	58027	56746
2014-10-22 11:47:02.039	54588	56096	58001	56740
2014-10-22 11:47:02.045	54660	56086	57949	56766
2014-10-22 11:47:02.049	54664	56069	57977	56819
2014-10-22 11:47:02.055	54584	56092	58012	56847
2014-10-22 11:47:02.059	54603	56089	57984	56889
2014-10-22 11:47:02.065	54679	56069	57945	56983
2014-10-22 11:47:02.069	54619	56081	57956	56962
2014-10-22 11:47:02.075	54562	56084	57962	56905
2014-10-22 11:47:02.079	54655	56089	57986	56871
2014-10-22 11:47:02.085	54664	56083	57988	56772
2014-10-22 11:47:02.089	54581	56087	57951	56741
2014-10-22 11:47:02.095	54627	56094	57951	56758
2014-10-22 11:47:02.099	54590	56087	57976	56746
2014-10-22 11:47:02.105	54589	56060	57988	56754
2014-10-22 11:47:02.109	54685	56084	57922	56772
2014-10-22 11:47:02.115	54608	56105	57917	56745
2014-10-22 11:47:02.119	54569	56057	57964	56698
2014-10-22 11:47:02.125	54609	56087	57943	56732
2014-10-22 11:47:02.130	54649	56100	57979	56801
2014-10-22 11:47:02.134	54640	56060	57953	56835
2014-10-22 11:47:02.140	54560	56090	57920	56834
2014-10-22 11:47:02.144	54586	56099	57944	56807
2014-10-22 11:47:02.150	54645	56059	57905	56791
2014-10-22 11:47:02.154	54632	56070	57971	56800
2014-10-22 11:47:02.160	54580	56077	58013	56829
2014-10-22 11:47:02.164	54577	56055	57962	56802
2014-10-22 11:47:02.170	54607	56070	57998	56807
2014-10-22 11:47:02.174	54621	56075	57987	56902
2014-10-22 11:47:02.180	54583	56060	57948	56908
2014-10-22 11:47:02.184	54544	56064	57951	56851
2014-10-22 11:47:02.190	54631	56073	57930	56810
2014-10-22 11:47:02.194	54600	56060	57981	56730
2014-10-22 11:47:02.200	54581	56048	58008	56698
2014-10-22 11:47:02.204	54659	56058	57940	56740
2014-10-22 11:47:02.210	54522	56069	57930	56754
2014-10-22 11:47:02.214	54526	56055	57948	56773
2014-10-22 11:47:02.220	54667	56045	57926	56802
2014-10-22 11:47:02.224	54604	56065	57898	56796
2014-10-22 11:47:02.230	54544	56041	57897	56766
2014-10-22 11:47:02.234	54572	56042	57896	56731
2014-10-22 11:47:02.240	54608	56064	57891	56751
2014-10-22 11:47:02.244	54600	56046	57908	56775
2014-10-22 11:47:02.250	54566	56038	57891	56762
2014-10-22 11:47:02.255	54583	56029	57894	56799
2014-10-22 11:47:02.259	54628	56051	57923	56853
2014-10-22 11:47:02.265	54572	56050	57891	56820
2014-10-22 11:47:02.269	54522	56038	57903	56778
2014-10-22 11:47:02.275	54625	56074	57960	56769
2014-10-22 11:47:02.279	54603	56068	57937	56718
2014-10-22 11:47:02.285	54523	56024	57904	56694
2014-10-22 11:47:02.289	54610	56034	57900	56764
2014-10-22 11:47:02.295	54585	56065	57894	56827
2014-10-22 11:47:02.299	54528	56046	57915	56804
2014-10-22 11:47:02.305	54612	56031	57916	56792
2014-10-22 11:47:02.309	54569	56046	57880	56768
2014-10-22 11:47:02.315	54530	56042	57892	56720
2014-10-22 11:47:02.319	54622	56024	57891	56761
2014-10-22 11:47:02.325	54576	56044	57856	56793
2014-10-22 11:47:02.329	54531	56050	57885	56847
2014-10-22 11:47:02.335	54581	56035	57923	56894
2014-10-22 11:47:02.339	54580	56036	57899	56767
2014-10-22 11:47:02.345	54582	56032	57859	56683
2014-10-22 11:47:02.349	54572	56042	57863	56700
2014-10-22 11:47:02.355	54540	56029	57876	56694
2014-10-22 11:47:02.359	54562	56021	57864	56707
2014-10-22 11:47:02.365	54584	56043	57864	56723
2014-10-22 11:47:02.369	54527	56036	57878	56704
2014-10-22 11:47:02.375	54558	56017	57906	56669
2014-10-22 11:47:02.380	54637	56023	57954	56704
2014-10-22 11:47:02.384	54515	56026	57951	56782
2014-10-22 11:47:02.390	54479	56026	57883	56807
2014-10-22 11:47:02.394	54598	56036	57905	56847
2014-10-22 11:47:02.400	54585	56017	57934	56883
2014-10-22 11:47:02.404	54519	56012	57894	56810
2014-10-22 11:47:02.410	54494	56020	57916	56719
2014-10-22 11:47:02.414	54562	56010	57902	56753
2014-10-22 11:47:02.420	54622	56021	57883	56788
2014-10-22 11:47:02.424	54528	56017	57891	56692
2014-10-22 11:47:02.430	54473	56010	57836	56669
2014-10-22 11:47:02.434	54547	56022	57843	56702
2014-10-22 11:47:02.440	54606	56025	57883	56675
2014-10-22 11:47:02.444	54563	56020	57866	56723
2014-10-22 11:47:02.450	54495	56015	57863	56763
2014-10-22 11:47:02.454	54503	56013	57863	56747
2014-10-22 11:47:02.460	54580	56015	57865	56750
2014-10-22 11:47:02.464	54611	56015	57859	56737
2014-10-22 11:47:02.470	54486	56006	57836	56736
2014-10-22 11:47:02.474	54451	56009	57837	56761
2014-10-22 11:47:02.480	54603	56010	57862	56778
2014-10-22 11:47:02.484	54597	55996	57882	56766
2014-10-22 11:47:02.490	54487	56006	57847	56757
2014-10-22 11:47:02.494	54507	56027	57847	56739
2014-10-22 11:47:02.500	54547	55998	57850	56680
2014-10-22 11:47:02.505	54526	55999	57818	56649
2014-10-22 11:47:02.509	54532	56013	57849	56673
2014-10-22 11:47:02.515	54555	56001	57841	56710
2014-10-22 11:47:02.519	54508	56013	57839	56745
2014-10-22 11:47:02.525	54529	55993	57895	56762
2014-10-22 11:47:02.529	54580	56001	57906	56726
2014-10-22 11:47:02.535	54453	56014	57908	56680
2014-10-22 11:47:02.539	54455	55995	57882	56694
2014-10-22 11:47:02.545	54596	56014	57857	56705
2014-10-22 11:47:02.549	54521	55989	57860	56674
2014-10-22 11:47:02.555	54461	55978	57841	56685
2014-10-22 11:47:02.559	54522	56008	57847	56697
2014-10-22 11:47:02.565	54523	55980	57867	56715
2014-10-22 11:47:02.569	54522	55978	57880	56738
2014-10-22 11:47:02.575	54507	56000	57880	56708
2014-10-22 11:47:02.579	54507	55978	57864	56716
2014-10-22 11:47:02.585	54545	55985	57854	56722
2014-10-22 11:47:02.589	54449	55990	57821	56719
2014-10-22 11:47:02.595	54474	55992	57806	56735
2014-10-22 11:47:02.599	54648	56009	57799	56713
2014-10-22 11:47:02.605	54466	55989	57790	56746
2014-10-22 11:47:02.609	54384	55975	57828	56727
2014-10-22 11:47:02.615	54596	55999	57841	56607
2014-10-22 11:47:02.619	54549	56009	57820	56618
2014-10-22 11:47:02.625	54495	55984	57855	56662
2014-10-22 11:47:02.630	54471	55986	57885	56650
2014-10-22 11:47:02.634	54421	55991	57855	56707
2014-10-22 11:47:02.640	54544	55976	57828	56748
2014-10-22 11:47:02.644	54549	55981	57808	56727
2014-10-22 11:47:02.650	54449	55984	57828	56729
2014-10-22 11:47:02.654	54451	55982	57850	56759
2014-10-22 11:47:02.660	54504	55974	57824	56754
2014-10-22 11:47:02.664	54528	55984	57800	56699
2014-10-22 11:47:02.670	54486	55988	57784	56684
2014-10-22 11:47:02.674	54447	55975	57783	56673
2014-10-22 11:47:02.680	54482	55984	57782	56628
2014-10-22 11:47:02.684	54534	55979	57773	56589
2014-10-22 11:47:02.690	54480	55979	57771	56594
2014-10-22 11:47:02.694	54439	55968	57763	56644
2014-10-22 11:47:02.700	54506	55960	57760	56666
2014-10-22 11:47:02.704	54531	55968	57777	56687
2014-10-22 11:47:02.710	54429	55978	57801	56711
2014-10-22 11:47:02.714	54389	55992	57798	56686
2014-10-22 11:47:02.720	54485	55971	57783	56715
2014-10-22 11:47:02.724	54521	55963	57768	56715
2014-10-22 11:47:02.730	54523	55967	57752	56614
2014-10-22 11:47:02.734	54402	55971	57765	56608
2014-10-22 11:47:02.740	54332	55978	57756	56643
2014-10-22 11:47:02.744	54553	55955	57744	56677
2014-10-22 11:47:02.750	54582	55955	57784	56758
2014-10-22 11:47:02.755	54438	55981	57812	56700
2014-10-22 11:47:02.759	54359	55981	57791	56649
2014-10-22 11:47:02.765	54431	55958	57803	56709
2014-10-22 11:47:02.769	54628	55955	57843	56693
2014-10-22 11:47:02.775	54463	55961	57797	56659
2014-10-22 11:47:02.779	54324	55969	57748	56647
2014-10-22 11:47:02.785	54506	55963	57770	56624
2014-10-22 11:47:02.789	54559	55947	57810	56597
2014-10-22 11:47:02.795	54411	55963	57809	56556
2014-10-22 11:47:02.799	54322	55952	57755	56595
2014-10-22 11:47:02.805	54550	55969	57735	56678
2014-10-22 11:47:02.809	54611	55998	57738	56694
2014-10-22 11:47:02.815	54400	55947	57708	56743
2014-10-22 11:47:02.819	54298	55945	57700	56746
2014-10-22 11:47:02.825	54384	55968	57758	56636
2014-10-22 11:47:02.829	54661	55939	57770	56597
2014-10-22 11:47:02.835	54495	55938	57734	56647
2014-10-22 11:47:02.839	54230	55973	57752	56691
2014-10-22 11:47:02.845	54458	55976	57759	56665
2014-10-22 11:47:02.849	54574	55943	57769	56629
2014-10-22 11:47:02.855	54425	55961	57765	56618
2014-10-22 11:47:02.859	54295	55981	57729	56564
2014-10-22 11:47:02.865	54476	55956	57749	56518
2014-10-22 11:47:02.869	54569	55953	57776	56544
2014-10-22 11:47:02.875	54342	55955	57764	56592
2014-10-22 11:47:02.880	54366	55958	57762	56585
2014-10-22 11:47:02.884	54513	55948	57769	56588
2014-10-22 11:47:02.890	54507	55943	57754	56650
2014-10-22 11:47:02.894	54369	55957	57767	56709
2014-10-22 11:47:02.900	54355	55960	57755	56752
2014-10-22 11:47:02.904	54484	55959	57715	56763
2014-10-22 11:47:02.910	54475	55942	57728	56734
2014-10-22 11:47:02.914	54412	55960	57718	56711
2014-10-22 11:47:02.920	54326	55977	57720	56650
2014-10-22 11:47:02.924	54439	55946	57740	56563
2014-10-22 11:47:02.930	54547	55940	57726	56569
2014-10-22 11:47:02.934	54372	55945	57729	56578
2014-10-22 11:47:02.940	54340	55959	57740	56546
2014-10-22 11:47:02.944	54399	55940	57739	56571
2014-10-22 11:47:02.950	54471	55931	57724	56601
2014-10-22 11:47:02.954	54499	55956	57744	56589
2014-10-22 11:47:02.960	54324	55941	57746	56559
2014-10-22 11:47:02.964	54335	55957	57717	56549
2014-10-22 11:47:02.970	54513	55955	57730	56568
2014-10-22 11:47:02.974	54505	55949	57726	56569
2014-10-22 11:47:02.980	54370	55952	57708	56587
2014-10-22 11:47:02.984	54300	55929	57696	56666
2014-10-22 11:47:02.990	54447	55951	57733	56710
2014-10-22 11:47:02.994	54492	55938	57774	56723
2014-10-22 11:47:03.000	54329	55931	57727	56726
2014-10-22 11:47:03.005	54365	55951	57716	56652
2014-10-22 11:47:03.009	54430	55925	57732	56560
2014-10-22 11:47:03.015	54440	55928	57722	56533
2014-10-22 11:47:03.019	54390	55942	57746	56599
2014-10-22 11:47:03.025	54311	55938	57735	56643
2014-10-22 11:47:03.029	54449	55933	57708	56654
2014-10-22 11:47:03.035	54441	55934	57712	56671
2014-10-22 11:47:03.039	54344	55928	57699	56594
2014-10-22 11:47:03.045	54401	55938	57691	56512
2014-10-22 11:47:03.049	54361	55949	57715	56510
2014-10-22 11:47:03.055	54363	55928	57726	56531
2014-10-22 11:47:03.059	54495	55938	57691	56546
2014-10-22 11:47:03.065	54453	55932	57670	56531
2014-10-22 11:47:03.069	54241	55924	57699	56514
2014-10-22 11:47:03.075	54347	55945	57716	56536
2014-10-22 11:47:03.079	54556	55938	57706	56620
2014-10-22 11:47:03.085	54375	55938	57694	56704
2014-10-22 11:47:03.089	54282	55922	57688	56685
2014-10-22 11:47:03.095	54408	55916	57710	56638
2014-10-22 11:47:03.099	54439	55925	57734	56638
2014-10-22 11:47:03.105	54384	55917	57728	56583
2014-10-22 11:47:03.109	54300	55915	57747	56531
2014-10-22 11:47:03.115	54436	55915	57759	56560
2014-10-22 11:47:03.119	54492	55926	57714	56579
2014-10-22 11:47:03.125	54313	55923	57696	56580
2014-10-22 11:47:03.130	54394	55931	57712	56585
2014-10-22 11:47:03.134	54389	55932	57691	56581
2014-10-22 11:47:03.140	54363	55924	57653	56583
2014-10-22 11:47:03.144	54440	55931	57654	56633
2014-10-22 11:47:03.150	54341	55916	57684	56669
2014-10-22 11:47:03.154	54413	55921	57715	56604
2014-10-22 11:47:03.160	54332	55914	57676	56546
2014-10-22 11:47:03.164	54326	55911	57607	56552
2014-10-22 11:47:03.170	54507	55939	57635	56546
2014-10-22 11:47:03.174	54315	55923	57652	56557
2014-10-22 11:47:03.180	54314	55909	57621	56582
2014-10-22 11:47:03.184	54345	55935	57618	56592
2014-10-22 11:47:03.190	54384	55937	57631	56559
2014-10-22 11:47:03.194	54506	55911	57672	56489
2014-10-22 11:47:03.200	54241	55920	57688	56496
2014-10-22 11:47:03.204	54287	55905	57671	56531
2014-10-22 11:47:03.210	54493	55915	57663	56535
2014-10-22 11:47:03.214	54431	55935	57669	56567
2014-10-22 11:47:03.220	54319	55908	57677	56590
2014-10-22 11:47:03.224	54237	55948	57685	56555
2014-10-22 11:47:03.230	54452	55930	57685	56543
2014-10-22 11:47:03.234	54420	55906	57677	56589
2014-10-22 11:47:03.240	54275	55949	57699	56615
2014-10-22 11:47:03.244	54413	55913	57702	56636
2014-10-22 11:47:03.250	54343	55905	57683	56611
2014-10-22 11:47:03.255	54344	55934	57699	56545
2014-10-22 11:47:03.259	54393	55930	57695	56588
2014-10-22 11:47:03.265	54284	55912	57674	56658
2014-10-22 11:47:03.269	54349	55913	57675	56612
2014-10-22 11:47:03.275	54390	55925	57689	56559
2014-10-22 11:47:03.279	54326	55932	57689	56570
2014-10-22 11:47:03.285	54369	55942	57669	56518
2014-10-22 11:47:03.289	54339	55914	57683	56448
2014-10-22 11:47:03.295	54314	55925	57697	56447
2014-10-22 11:47:03.299	54413	55933	57650	56450
2014-10-22 11:47:03.305	54364	55896	57621	56487
2014-10-22 11:47:03.309	54336	55913	57633	56556
2014-10-22 11:47:03.315	54421	55925	57619	56588
2014-10-22 11:47:03.319	54362	55930	57628	56617
2014-10-22 11:47:03.325	54270	55922	57630	56688
2014-10-22 11:47:03.329	54357	55905	57607	56694
2014-10-22 11:47:03.335	54445	55925	57661	56598
2014-10-22 11:47:03.339	54328	55927	57667	56551
2014-10-22 11:47:03.345	54299	55906	57628	56533
2014-10-22 11:47:03.349	54379	55925	57683	56460
2014-10-22 11:47:03.355	54350	55942	57680	56424
2014-10-22 11:47:03.359	54347	55927	57629	56480
2014-10-22 11:47:03.365	54381	55920	57637	56565
2014-10-22 11:47:03.369	54376	55923	57638	56626
2014-10-22 11:47:03.375	54311	55920	57661	56686
2014-10-22 11:47:03.380	54328	55914	57651	56698
2014-10-22 11:47:03.384	54430	55919	57624	56597
2014-10-22 11:47:03.390	54349	55918	57654	56521
2014-10-22 11:47:03.394	54279	55921	57652	56527
2014-10-22 11:47:03.400	54419	55929	57645	56484
2014-10-22 11:47:03.404	54400	55931	57641	56428
2014-10-22 11:47:03.410	54277	55934	57669	56485
2014-10-22 11:47:03.414	54398	55915	57727	56540
2014-10-22 11:47:03.420	54392	55921	57684	56562
2014-10-22 11:47:03.424	54280	55922	57662	56613
2014-10-22 11:47:03.430	54382	55927	57706	56604
2014-10-22 11:47:03.434	54380	55928	57709	56523
2014-10-22 11:47:03.440	54353	55897	57687	56442
2014-10-22 11:47:03.444	54376	55922	57664	56438
2014-10-22 11:47:03.450	54324	55932	57676	56490
2014-10-22 11:47:03.454	54341	55928	57666	56576
2014-10-22 11:47:03.460	54390	55927	57621	56637
2014-10-22 11:47:03.464	54381	55927	57623	56636
2014-10-22 11:47:03.470	54281	55923	57629	56686
2014-10-22 11:47:03.474	54336	55908	57586	56665
2014-10-22 11:47:03.480	54444	55949	57579	56626
2014-10-22 11:47:03.484	54336	55940	57616	56633
2014-10-22 11:47:03.490	54316	55916	57620	56601
2014-10-22 11:47:03.494	54353	55932	57648	56563
2014-10-22 11:47:03.500	54391	55938	57696	56473
2014-10-22 11:47:03.505	54365	55937	57692	56448
2014-10-22 11:47:03.509	54288	55921	57678	56466
2014-10-22 11:47:03.515	54411	55927	57652	56444
2014-10-22 11:47:03.519	54382	55931	57625	56498
2014-10-22 11:47:03.525	54309	55931	57644	56559
2014-10-22 11:47:03.529	54381	55944	57657	56541
2014-10-22 11:47:03.535	54347	55938	57652	56481
2014-10-22 11:47:03.539	54369	55917	57668	56519
2014-10-22 11:47:03.545	54379	55934	57653	56578
2014-10-22 11:47:03.549	54321	55939	57611	56546
2014-10-22 11:47:03.555	54330	55936	57613	56569
2014-10-22 11:47:03.559	54387	55943	57636	56588
2014-10-22 11:47:03.565	54360	55926	57667	56587
2014-10-22 11:47:03.569	54301	55950	57680	56635
2014-10-22 11:47:03.575	54416	55944	57651	56651
2014-10-22 11:47:03.579	54376	55921	57675	56653
2014-10-22 11:47:03.585	54279	55945	57700	56621
2014-10-22 11:47:03.589	54362	55952	57672	56585
2014-10-22 11:47:03.595	54369	55935	57685	56619
2014-10-22 11:47:03.599	54414	55926	57687	56628
2014-10-22 11:47:03.605	54361	55946	57660	56591
2014-10-22 11:47:03.609	54285	55932	57649	56547
2014-10-22 11:47:03.615	54391	55918	57635	56462
2014-10-22 11:47:03.619	54365	55953	57652	56399
2014-10-22 11:47:03.625	54401	55940	57648	56412
2014-10-22 11:47:03.630	54412	55921	57625	56452
2014-10-22 11:47:03.634	54284	55947	57655	56477
2014-10-22 11:47:03.640	54376	55961	57662	56533
2014-10-22 11:47:03.644	54412	55944	57646	56619
2014-10-22 11:47:03.650	54374	55943	57651	56647
2014-10-22 11:47:03.654	54382	55970	57672	56694
2014-10-22 11:47:03.660	54329	55942	57695	56772
2014-10-22 11:47:03.664	54399	55941	57673	56714
2014-10-22 11:47:03.670	54411	55953	57651	56658
2014-10-22 11:47:03.674	54335	55929	57667	56662
2014-10-22 11:47:03.680	54371	55960	57680	56553
2014-10-22 11:47:03.684	54347	55963	57690	56491
2014-10-22 11:47:03.690	54365	55940	57678	56523
2014-10-22 11:47:03.694	54428	55942	57661	56514
2014-10-22 11:47:03.700	54333	55940	57670	56495
2014-10-22 11:47:03.704	54371	55952	57645	56489
2014-10-22 11:47:03.710	54395	55979	57601	56503
2014-10-22 11:47:03.714	54306	55959	57618	56509
2014-10-22 11:47:03.720	54432	55934	57655	56525
2014-10-22 11:47:03.724	54416	55974	57678	56539
2014-10-22 11:47:03.730	54329	55982	57705	56536
2014-10-22 11:47:03.734	54383	55944	57742	56578
2014-10-22 11:47:03.740	54399	55944	57733	56597
2014-10-22 11:47:03.744	54448	55974	57666	56556
2014-10-22 11:47:03.750	54347	55974	57637	56577
2014-10-22 11:47:03.755	54332	55968	57647	56676
2014-10-22 11:47:03.759	54472	55964	57674	56736
2014-10-22 11:47:03.765	54378	55962	57702	56745
2014-10-22 11:47:03.769	54377	55973	57685	56742
2014-10-22 11:47:03.775	54419	55967	57673	56705
2014-10-22 11:47:03.779	54348	55986	57660	56600
2014-10-22 11:47:03.785	54416	55987	57631	56518
2014-10-22 11:47:03.789	54430	55976	57649	56529
2014-10-22 11:47:03.795	54385	55980	57690	56559
2014-10-22 11:47:03.799	54364	55987	57707	56607
2014-10-22 11:47:03.805	54387	55994	57690	56657
2014-10-22 11:47:03.809	54443	55977	57685	56663
2014-10-22 11:47:03.815	54406	55993	57685	56626
2014-10-22 11:47:03.819	54401	56004	57671	56573
2014-10-22 11:47:03.825	54376	55990	57699	56539
2014-10-22 11:47:03.829	54415	55981	57715	56496
2014-10-22 11:47:03.835	54483	55985	57696	56488
2014-10-22 11:47:03.839	54381	56004	57685	56501
2014-10-22 11:47:03.845	54379	55982	57691	56484
2014-10-22 11:47:03.849	54392	55985	57694	56545
2014-10-22 11:47:03.855	54437	55999	57662	56652
2014-10-22 11:47:03.859	54489	55983	57649	56698
2014-10-22 11:47:03.865	54354	56008	57671	56705
2014-10-22 11:47:03.869	54383	56000	57697	56692
2014-10-22 11:47:03.875	54458	55978	57707	56683
2014-10-22 11:47:03.880	54455	55989	57700	56675
2014-10-22 11:47:03.884	54446	55993	57698	56684
2014-10-22 11:47:03.890	54375	56009	57686	56715
2014-10-22 11:47:03.894	54403	56014	57690	56725
2014-10-22 11:47:03.900	54444	56010	57671	56739
2014-10-22 11:47:03.904	54447	56021	57651	56694
2014-10-22 11:47:03.910	54414	56019	57699	56585
2014-10-22 11:47:03.914	54387	56001	57723	56513
2014-10-22 11:47:03.920	54446	56013	57723	56503
2014-10-22 11:47:03.924	54425	56015	57739	56529
2014-10-22 11:47:03.930	54396	55999	57720	56541
2014-10-22 11:47:03.934	54453	56034	57709	56573
2014-10-22 11:47:03.940	54435	56025	57709	56652
2014-10-22 11:47:03.944	54437	56003	57687	56677
2014-10-22 11:47:03.950	54446	56036	57684	56634
2014-10-22 11:47:03.954	54399	56010	57689	56580
2014-10-22 11:47:03.960	54493	56004	57707	56563
2014-10-22 11:47:03.964	54478	56045	57740	56614
2014-10-22 11:47:03.970	54402	56015	57737	56666
2014-10-22 11:47:03.974	54465	55999	57715	56714
2014-10-22 11:47:03.980	54418	56038	57690	56785
2014-10-22 11:47:03.984	54468	56039	57688	56789
2014-10-22 11:47:03.990	54492	56018	57706	56772
2014-10-22 11:47:03.994	54414	56030	57705	56772
2014-10-22 11:47:04.000	54497	56031	57722	56703
2014-10-22 11:47:04.005	54456	56033	57745	56630
2014-10-22 11:47:04.009	54419	56041	57736	56606
2014-10-22 11:47:04.015	54472	56041	57723	56556
2014-10-22 11:47:04.019	54464	56044	57701	56483
2014-10-22 11:47:04.025	54468	56040	57684	56469
2014-10-22 11:47:04.029	54429	56054	57712	56527
2014-10-22 11:47:04.035	54463	56047	57744	56610
2014-10-22 11:47:04.039	54492	56032	57743	56694
2014-10-22 11:47:04.045	54438	56046	57757	56767
2014-10-22 11:47:04.049	54468	56057	57775	56786
2014-10-22 11:47:04.055	54483	56045	57734	56763
2014-10-22 11:47:04.059	54476	56052	57703	56752
2014-10-22 11:47:04.065	54442	56063	57734	56740
2014-10-22 11:47:04.069	54451	56047	57756	56731
2014-10-22 11:47:04.075	54513	56058	57772	56731
2014-10-22 11:47:04.079	54464	56047	57780	56723
2014-10-22 11:47:04.085	54472	56040	57770	56723
2014-10-22 11:47:04.089	54473	56073	57764	56687
2014-10-22 11:47:04.095	54442	56065	57766	56638
2014-10-22 11:47:04.099	54497	56047	57759	56600
2014-10-22 11:47:04.105	54492	56061	57751	56562
2014-10-22 11:47:04.109	54471	56077	57766	56542
2014-10-22 11:47:04.115	54478	56053	57751	56533
2014-10-22 11:47:04.119	54500	56066	57739	56585
2014-10-22 11:47:04.125	54497	56075	57756	56680
2014-10-22 11:47:04.130	54477	56048	57738	56738
2014-10-22 11:47:04.134	54489	56075	57735	56787
2014-10-22 11:47:04.140	54510	56063	57746	56832
2014-10-22 11:47:04.144	54503	56066	57738	56821
2014-10-22 11:47:04.150	54434	56080	57747	56792
2014-10-22 11:47:04.154	54526	56059	57755	56720
2014-10-22 11:47:04.160	54574	56087	57761	56616
2014-10-22 11:47:04.164	54460	56100	57785	56592
2014-10-22 11:47:04.170	54500	56077	57784	56589
2014-10-22 11:47:04.174	54497	56057	57768	56587
2014-10-22 11:47:04.180	54518	56097	57779	56622
2014-10-22 11:47:04.184	54540	56100	57766	56659
2014-10-22 11:47:04.190	54462	56061	57750	56727
2014-10-22 11:47:04.194	54527	56104	57761	56781
2014-10-22 11:47:04.200	54498	56094	57760	56825
2014-10-22 11:47:04.204	54497	56067	57773	56891
2014-10-22 11:47:04.210	54562	56093	57775	56923
2014-10-22 11:47:04.214	54476	56104	57763	56919
2014-10-22 11:47:04.220	54512	56095	57766	56850
2014-10-22 11:47:04.224	54550	56087	57781	56725
2014-10-22 11:47:04.230	54558	56093	57803	56647
2014-10-22 11:47:04.234	54563	56093	57814	56605
2014-10-22 11:47:04.240	54472	56103	57828	56604
2014-10-22 11:47:04.244	54528	56097	57828	56648
2014-10-22 11:47:04.250	54559	56111	57824	56650
2014-10-22 11:47:04.255	54521	56117	57803	56615
2014-10-22 11:47:04.259	54535	56088	57782	56595
2014-10-22 11:47:04.265	54508	56129	57799	56604
2014-10-22 11:47:04.269	54561	56128	57803	56620
2014-10-22 11:47:04.275	54539	56078	57818	56658
2014-10-22 11:47:04.279	54511	56118	57842	56779
2014-10-22 11:47:04.285	54575	56120	57838	56920
2014-10-22 11:47:04.289	54502	56068	57831	56969
2014-10-22 11:47:04.295	54554	56113	57838	56929
2014-10-22 11:47:04.299	54588	56141	57863	56876
2014-10-22 11:47:04.305	54513	56108	57843	56830
2014-10-22 11:47:04.309	54602	56124	57861	56777
2014-10-22 11:47:04.315	54552	56147	57948	56770
2014-10-22 11:47:04.319	54535	56140	57935	56808
2014-10-22 11:47:04.325	54599	56126	57879	56799
2014-10-22 11:47:04.329	54528	56134	57863	56740
2014-10-22 11:47:04.335	54574	56121	57859	56674
2014-10-22 11:47:04.339	54592	56111	57826	56585
2014-10-22 11:47:04.345	54550	56149	57757	56556
2014-10-22 11:47:04.349	54578	56124	57758	56654
2014-10-22 11:47:04.355	54578	56101	57797	56752
2014-10-22 11:47:04.359	54550	56143	57784	56798
2014-10-22 11:47:04.365	54562	56154	57803	56812
2014-10-22 11:47:04.369	54579	56125	57850	56812
2014-10-22 11:47:04.375	54564	56132	57834	56829
2014-10-22 11:47:04.380	54592	56143	57815	56843
2014-10-22 11:47:04.384	54571	56144	57802	56848
2014-10-22 11:47:04.390	54570	56169	57802	56826
2014-10-22 11:47:04.394	54606	56148	57854	56859
2014-10-22 11:47:04.400	54566	56142	57832	56948
2014-10-22 11:47:04.404	54605	56159	57796	56931
2014-10-22 11:47:04.410	54615	56150	57825	56852
2014-10-22 11:47:04.414	54558	56161	57805	56762
2014-10-22 11:47:04.420	54595	56160	57803	56649
2014-10-22 11:47:04.424	54613	56178	57808	56625
2014-10-22 11:47:04.430	54610	56177	57804	56651
2014-10-22 11:47:04.434	54614	56144	57850	56677
2014-10-22 11:47:04.440	54580	56160	57846	56758
2014-10-22 11:47:04.444	54607	56178	57869	56807
2014-10-22 11:47:04.450	54633	56164	57928	56801
2014-10-22 11:47:04.454	54598	56155	57940	56793
2014-10-22 11:47:04.460	54601	56185	57950	56784
2014-10-22 11:47:04.464	54621	56176	57896	56808
2014-10-22 11:47:04.470	54628	56155	57868	56847
2014-10-22 11:47:04.474	54627	56164	57911	56865
2014-10-22 11:47:04.480	54601	56167	57919	56926
2014-10-22 11:47:04.484	54614	56189	57914	56975
2014-10-22 11:47:04.490	54648	56161	57902	56946
2014-10-22 11:47:04.494	54618	56177	57902	56919
2014-10-22 11:47:04.500	54621	56208	57903	56817
2014-10-22 11:47:04.505	54618	56179	57900	56701
2014-10-22 11:47:04.509	54586	56186	57930	56704
2014-10-22 11:47:04.515	54630	56177	57941	56751
2014-10-22 11:47:04.519	54624	56204	57917	56798
2014-10-22 11:47:04.525	54621	56190	57897	56833
2014-10-22 11:47:04.529	54629	56152	57871	56886
2014-10-22 11:47:04.535	54629	56201	57854	56900
2014-10-22 11:47:04.539	54686	56184	57869	56859
2014-10-22 11:47:04.545	54638	56162	57894	56793
2014-10-22 11:47:04.549	54597	56198	57916	56734
2014-10-22 11:47:04.555	54665	56205	57933	56810
2014-10-22 11:47:04.559	54670	56185	57916	56937
2014-10-22 11:47:04.565	54640	56189	57914	56953
2014-10-22 11:47:04.569	54658	56208	57916	56896
2014-10-22 11:47:04.575	54660	56196	57896	56866
2014-10-22 11:47:04.579	54639	56204	57921	56842
2014-10-22 11:47:04.585	54649	56206	57938	56818
2014-10-22 11:47:04.589	54655	56185	57934	56846
2014-10-22 11:47:04.595	54641	56211	57938	56878
2014-10-22 11:47:04.599	54662	56200	57925	56875
2014-10-22 11:47:04.605	54692	56187	57908	56850
2014-10-22 11:47:04.609	54645	56227	57917	56816
2014-10-22 11:47:04.615	54642	56213	57952	56805
2014-10-22 11:47:04.619	54666	56195	57967	56801
2014-10-22 11:47:04.625	54653	56208	57984	56774
2014-10-22 11:47:04.630	54683	56210	57983	56788
2014-10-22 11:47:04.634	54660	56225	57958	56845
2014-10-22 11:47:04.640	54668	56226	57948	56892
2014-10-22 11:47:04.644	54689	56216	57921	56896
2014-10-22 11:47:04.650	54676	56219	57894	56903
2014-10-22 11:47:04.654	54699	56222	57885	56931
2014-10-22 11:47:04.660	54674	56214	57880	56949
2014-10-22 11:47:04.664	54684	56218	57899	56948
2014-10-22 11:47:04.670	54682	56237	57936	56901
2014-10-22 11:47:04.674	54675	56238	57932	56872
2014-10-22 11:47:04.680	54722	56215	57923	56929
2014-10-22 11:47:04.684	54685	56211	57950	56972
2014-10-22 11:47:04.690	54657	56250	57945	56923
2014-10-22 11:47:04.694	54694	56244	57951	56883
2014-10-22 11:47:04.700	54720	56214	58005	56847
2014-10-22 11:47:04.704	54708	56224	58028	56800
2014-10-22 11:47:04.710	54664	56231	58020	56793
2014-10-22 11:47:04.714	54674	56235	58032	56770
2014-10-22 11:47:04.720	54705	56237	58050	56853
2014-10-22 11:47:04.724	54701	56248	58029	57000
2014-10-22 11:47:04.730	54702	56247	57998	57038
2014-10-22 11:47:04.734	54701	56226	58024	57019
2014-10-22 11:47:04.740	54704	56227	58031	56960
2014-10-22 11:47:04.744	54705	56258	57992	56919
2014-10-22 11:47:04.750	54694	56262	57994	56887
2014-10-22 11:47:04.755	54705	56236	57989	56850
2014-10-22 11:47:04.759	54702	56237	57997	56834
2014-10-22 11:47:04.765	54714	56263	58035	56818
2014-10-22 11:47:04.769	54715	56276	58021	56878
2014-10-22 11:47:04.775	54664	56238	58001	56944
2014-10-22 11:47:04.779	54717	56236	57995	56945
2014-10-22 11:47:04.785	54742	56265	57983	56941
2014-10-22 11:47:04.789	54695	56251	57973	56962
2014-10-22 11:47:04.795	54736	56239	57964	57001
2014-10-22 11:47:04.799	54726	56256	57968	56990
2014-10-22 11:47:04.805	54705	56274	57973	56993
2014-10-22 11:47:04.809	54726	56260	57969	57033
2014-10-22 11:47:04.815	54714	56253	57985	57055
2014-10-22 11:47:04.819	54738	56256	58007	57036
2014-10-22 11:47:04.825	54747	56288	57991	56945
2014-10-22 11:47:04.829	54734	56287	57974	56885
2014-10-22 11:47:04.835	54741	56235	57958	56851
2014-10-22 11:47:04.839	54734	56279	57960	56816
2014-10-22 11:47:04.845	54764	56293	57998	56785
2014-10-22 11:47:04.849	54783	56256	58015	56767
2014-10-22 11:47:04.855	54742	56289	58034	56847
2014-10-22 11:47:04.859	54728	56306	58039	56935
2014-10-22 11:47:04.865	54740	56262	58017	56958
2014-10-22 11:47:04.869	54738	56249	58022	56931
2014-10-22 11:47:04.875	54721	56311	58032	56925
2014-10-22 11:47:04.880	54748	56292	58034	56987
2014-10-22 11:47:04.884	54766	56243	58044	57029
2014-10-22 11:47:04.890	54728	56293	58055	57067
2014-10-22 11:47:04.894	54776	56308	58062	57116
2014-10-22 11:47:04.900	54792	56291	58084	57145
2014-10-22 11:47:04.904	54731	56288	58086	57159
2014-10-22 11:47:04.910	54762	56308	58062	57142
2014-10-22 11:47:04.914	54790	56305	58073	57084
2014-10-22 11:47:04.920	54764	56270	58083	56978
2014-10-22 11:47:04.924	54756	56305	58076	56895
2014-10-22 11:47:04.930	54785	56341	58070	56873
2014-10-22 11:47:04.934	54802	56307	58064	56869
2014-10-22 11:47:04.940	54759	56275	58061	56838
2014-10-22 11:47:04.944	54749	56306	58058	56785
2014-10-22 11:47:04.950	54792	56331	58050	56796
2014-10-22 11:47:04.954	54778	56295	58039	56823
2014-10-22 11:47:04.960	54739	56308	58080	56852
2014-10-22 11:47:04.964	54767	56333	58113	56935
2014-10-22 11:47:04.970	54805	56313	58108	57011
2014-10-22 11:47:04.974	54781	56309	58145	57124
2014-10-22 11:47:04.980	54769	56317	58137	57265
2014-10-22 11:47:04.984	54819	56305	58107	57296
2014-10-22 11:47:04.990	54819	56311	58100	57231
2014-10-22 11:47:04.994	54776	56340	58076	57126
2014-10-22 11:47:05.000	54806	56325	58078	57030
2014-10-22 11:47:05.005	54822	56311	58074	56983
2014-10-22 11:47:05.009	54803	56314	58076	56938
2014-10-22 11:47:05.015	54808	56342	58081	56910
2014-10-22 11:47:05.019	54779	56334	58078	56864
2014-10-22 11:47:05.025	54790	56321	58095	56795
2014-10-22 11:47:05.029	54841	56345	58057	56827
2014-10-22 11:47:05.035	54818	56310	58032	56903
2014-10-22 11:47:05.039	54814	56339	58069	56969
2014-10-22 11:47:05.045	54820	56366	58092	57037
2014-10-22 11:47:05.049	54803	56328	58113	57105
2014-10-22 11:47:05.055	54819	56314	58125	57187
2014-10-22 11:47:05.059	54797	56332	58127	57227
2014-10-22 11:47:05.065	54795	56362	58113	57186
2014-10-22 11:47:05.069	54828	56339	58089	57086
2014-10-22 11:47:05.075	54818	56348	58067	56983
2014-10-22 11:47:05.079	54834	56362	58065	56950
2014-10-22 11:47:05.085	54826	56333	58106	56972
2014-10-22 11:47:05.089	54810	56339	58103	56973
2014-10-22 11:47:05.095	54856	56384	58093	56954
2014-10-22 11:47:05.099	54849	56389	58119	56934
2014-10-22 11:47:05.105	54825	56336	58121	56960
2014-10-22 11:47:05.109	54813	56330	58112	57028
2014-10-22 11:47:05.115	54806	56378	58130	57039
2014-10-22 11:47:05.119	54871	56385	58150	57054
2014-10-22 11:47:05.125	54859	56349	58113	57103
2014-10-22 11:47:05.130	54819	56375	58092	57160
2014-10-22 11:47:05.134	54844	56386	58134	57218
2014-10-22 11:47:05.140	54840	56343	58152	57209
2014-10-22 11:47:05.144	54867	56349	58151	57168
2014-10-22 11:47:05.150	54837	56376	58164	57118
2014-10-22 11:47:05.154	54805	56387	58162	57060
2014-10-22 11:47:05.160	54879	56370	58157	57020
2014-10-22 11:47:05.164	54866	56392	58157	56979
2014-10-22 11:47:05.170	54839	56403	58139	56964
2014-10-22 11:47:05.174	54867	56356	58131	56954
2014-10-22 11:47:05.180	54859	56372	58123	56912
2014-10-22 11:47:05.184	54860	56398	58088	56916
2014-10-22 11:47:05.190	54858	56370	58096	56936
2014-10-22 11:47:05.194	54847	56372	58120	56951
2014-10-22 11:47:05.200	54864	56393	58112	57019
2014-10-22 11:47:05.204	54888	56378	58140	57070
2014-10-22 11:47:05.210	54873	56383	58169	57130
2014-10-22 11:47:05.214	54863	56388	58146	57246
2014-10-22 11:47:05.220	54887	56397	58145	57279
2014-10-22 11:47:05.224	54868	56387	58192	57253
2014-10-22 11:47:05.230	54845	56341	58206	57232
2014-10-22 11:47:05.234	54885	56396	58204	57140
2014-10-22 11:47:05.240	54894	56433	58217	57043
2014-10-22 11:47:05.244	54864	56381	58203	57018
2014-10-22 11:47:05.250	54868	56371	58187	56998
2014-10-22 11:47:05.255	54885	56398	58151	56967
2014-10-22 11:47:05.259	54890	56393	58137	57017
2014-10-22 11:47:05.265	54882	56382	58159	57072
2014-10-22 11:47:05.269	54875	56419	58172	57050
2014-10-22 11:47:05.275	54883	56408	58218	57032
2014-10-22 11:47:05.279	54902	56382	58217	57044
2014-10-22 11:47:05.285	54909	56407	58168	57060
2014-10-22 11:47:05.289	54901	56413	58145	57078
2014-10-22 11:47:05.295	54885	56419	58144	57160
2014-10-22 11:47:05.299	54902	56411	58140	57211
2014-10-22 11:47:05.305	54956	56399	58141	57195
2014-10-22 11:47:05.309	54889	56407	58184	57216
2014-10-22 11:47:05.315	54868	56405	58213	57210
2014-10-22 11:47:05.319	54946	56414	58203	57181
2014-10-22 11:47:05.325	54886	56413	58186	57137
2014-10-22 11:47:05.329	54885	56416	58187	57048
2014-10-22 11:47:05.335	54924	56427	58193	57004
2014-10-22 11:47:05.339	54908	56414	58192	57010
2014-10-22 11:47:05.345	54916	56417	58203	57011
2014-10-22 11:47:05.349	54887	56411	58209	57031
2014-10-22 11:47:05.355	54917	56401	58194	57040
2014-10-22 11:47:05.359	54929	56420	58188	57096
2014-10-22 11:47:05.365	54903	56414	58198	57187
2014-10-22 11:47:05.369	54909	56414	58183	57207
2014-10-22 11:47:05.375	54928	56420	58166	57231
2014-10-22 11:47:05.380	54952	56415	58185	57199
2014-10-22 11:47:05.384	54903	56437	58202	57146
2014-10-22 11:47:05.390	54919	56430	58184	57151
2014-10-22 11:47:05.394	54939	56423	58172	57172
2014-10-22 11:47:05.400	54943	56424	58181	57206
2014-10-22 11:47:05.404	54964	56416	58203	57176
2014-10-22 11:47:05.410	54883	56438	58202	57142
2014-10-22 11:47:05.414	54932	56435	58187	57091
2014-10-22 11:47:05.420	54964	56428	58189	57024
2014-10-22 11:47:05.424	54915	56432	58186	57029
2014-10-22 11:47:05.430	54970	56417	58225	57019
2014-10-22 11:47:05.434	54922	56426	58241	57031
2014-10-22 11:47:05.440	54913	56438	58203	57073
2014-10-22 11:47:05.444	54947	56430	58210	57101
2014-10-22 11:47:05.450	54927	56438	58219	57161
2014-10-22 11:47:05.454	54965	56457	58237	57222
2014-10-22 11:47:05.460	54948	56444	58259	57265
2014-10-22 11:47:05.464	54935	56444	58270	57276
2014-10-22 11:47:05.470	54961	56447	58268	57243
2014-10-22 11:47:05.474	54950	56425	58214	57214
2014-10-22 11:47:05.480	54969	56449	58205	57170
2014-10-22 11:47:05.484	54973	56460	58214	57101
2014-10-22 11:47:05.490	54939	56438	58179	57054
2014-10-22 11:47:05.494	54946	56448	58191	57030
2014-10-22 11:47:05.500	54959	56466	58214	57044
2014-10-22 11:47:05.505	54943	56457	58209	57088
2014-10-22 11:47:05.509	54955	56449	58214	57128
2014-10-22 11:47:05.515	54968	56465	58231	57175
2014-10-22 11:47:05.519	54959	56458	58242	57174
2014-10-22 11:47:05.525	54950	56449	58266	57146
2014-10-22 11:47:05.529	54937	56454	58296	57188
2014-10-22 11:47:05.535	54973	56434	58290	57240
2014-10-22 11:47:05.539	54964	56446	58282	57305
2014-10-22 11:47:05.545	54922	56469	58272	57357
2014-10-22 11:47:05.549	54987	56448	58272	57311
2014-10-22 11:47:05.555	54972	56448	58289	57253
2014-10-22 11:47:05.559	54946	56447	58280	57159
2014-10-22 11:47:05.565	54982	56449	58270	57058
2014-10-22 11:47:05.569	54968	56457	58269	57061
2014-10-22 11:47:05.575	55017	56450	58262	57093
2014-10-22 11:47:05.579	54991	56468	58264	57152
2014-10-22 11:47:05.585	54968	56462	58256	57202
2014-10-22 11:47:05.589	55013	56438	58245	57165
2014-10-22 11:47:05.595	54973	56463	58266	57130
2014-10-22 11:47:05.599	55005	56479	58259	57127
2014-10-22 11:47:05.605	54987	56446	58235	57123
2014-10-22 11:47:05.609	54960	56450	58250	57133
2014-10-22 11:47:05.615	55006	56482	58241	57174
2014-10-22 11:47:05.619	54971	56478	58239	57218
2014-10-22 11:47:05.625	54985	56469	58253	57212
2014-10-22 11:47:05.630	54997	56461	58267	57230
2014-10-22 11:47:05.634	54970	56472	58304	57272
2014-10-22 11:47:05.640	54994	56470	58295	57245
2014-10-22 11:47:05.644	54994	56461	58261	57233
2014-10-22 11:47:05.650	54999	56474	58256	57198
2014-10-22 11:47:05.654	55003	56468	58243	57097
2014-10-22 11:47:05.660	54990	56469	58248	57101
2014-10-22 11:47:05.664	55011	56451	58259	57162
2014-10-22 11:47:05.670	55004	56429	58230	57172
2014-10-22 11:47:05.674	54989	56466	58236	57195
2014-10-22 11:47:05.680	54995	56479	58235	57203
2014-10-22 11:47:05.684	54983	56445	58219	57198
2014-10-22 11:47:05.690	55019	56459	58246	57228
2014-10-22 11:47:05.694	54995	56478	58254	57245
2014-10-22 11:47:05.700	54965	56475	58254	57235
2014-10-22 11:47:05.704	55016	56459	58264	57221
2014-10-22 11:47:05.710	54971	56445	58278	57196
2014-10-22 11:47:05.714	54993	56480	58266	57188
2014-10-22 11:47:05.720	55008	56476	58242	57179
2014-10-22 11:47:05.724	54973	56456	58272	57183
2014-10-22 11:47:05.730	55023	56476	58294	57188
2014-10-22 11:47:05.734	54987	56488	58284	57123
2014-10-22 11:47:05.740	55004	56474	58283	57119
2014-10-22 11:47:05.744	55008	56468	58273	57187
2014-10-22 11:47:05.750	54961	56482	58258	57192
2014-10-22 11:47:05.755	55038	56466	58252	57191
2014-10-22 11:47:05.759	55013	56466	58260	57198
2014-10-22 11:47:05.765	54986	56480	58297	57192
2014-10-22 11:47:05.769	55011	56471	58306	57185
2014-10-22 11:47:05.775	54969	56476	58278	57191
2014-10-22 11:47:05.779	55012	56450	58269	57261
2014-10-22 11:47:05.785	55041	56457	58261	57327
2014-10-22 11:47:05.789	54998	56482	58240	57332
2014-10-22 11:47:05.795	55002	56453	58241	57278
2014-10-22 11:47:05.799	54975	56473	58267	57197
2014-10-22 11:47:05.805	54946	56483	58282	57181
2014-10-22 11:47:05.809	55004	56441	58279	57178
2014-10-22 11:47:05.815	55027	56443	58281	57151
2014-10-22 11:47:05.819	54974	56481	58300	57135
2014-10-22 11:47:05.825	54966	56472	58306	57131
2014-10-22 11:47:05.829	55018	56450	58294	57138
2014-10-22 11:47:05.835	55018	56468	58327	57087
2014-10-22 11:47:05.839	55006	56461	58349	57068
2014-10-22 11:47:05.845	55001	56454	58328	57146
2014-10-22 11:47:05.849	54975	56453	58323	57217
2014-10-22 11:47:05.855	55036	56445	58324	57257
2014-10-22 11:47:05.859	55014	56470	58303	57255
2014-10-22 11:47:05.865	54961	56466	58286	57254
2014-10-22 11:47:05.869	55025	56441	58309	57241
2014-10-22 11:47:05.875	55002	56445	58305	57192
2014-10-22 11:47:05.880	54997	56456	58288	57141
2014-10-22 11:47:05.884	54995	56451	58282	57112
2014-10-22 11:47:05.890	54968	56457	58266	57139
2014-10-22 11:47:05.894	55012	56465	58293	57243
2014-10-22 11:47:05.900	54995	56451	58301	57324
2014-10-22 11:47:05.904	54984	56457	58308	57307
2014-10-22 11:47:05.910	55003	56456	58341	57276
2014-10-22 11:47:05.914	54986	56443	58324	57217
2014-10-22 11:47:05.920	54994	56437	58315	57187
2014-10-22 11:47:05.924	55005	56448	58303	57228
2014-10-22 11:47:05.930	54998	56471	58278	57233
2014-10-22 11:47:05.934	55000	56449	58294	57213
2014-10-22 11:47:05.940	54988	56437	58305	57185
2014-10-22 11:47:05.944	55000	56454	58306	57165
2014-10-22 11:47:05.950	55017	56460	58305	57107
2014-10-22 11:47:05.954	54983	56453	58295	57019
2014-10-22 11:47:05.960	54989	56440	58309	57020
2014-10-22 11:47:05.964	55001	56431	58299	57057
2014-10-22 11:47:05.970	54984	56435	58257	57099
2014-10-22 11:47:05.974	54962	56455	58277	57200
2014-10-22 11:47:05.980	54980	56436	58298	57279
2014-10-22 11:47:05.984	55003	56441	58284	57302
2014-10-22 11:47:05.990	54968	56470	58289	57318
2014-10-22 11:47:05.994	54983	56431	58274	57284
2014-10-22 11:47:06.000	54983	56419	58289	57234
2014-10-22 11:47:06.005	54980	56446	58314	57230
2014-10-22 11:47:06.009	55008	56442	58293	57232
2014-10-22 11:47:06.015	54986	56432	58276	57241
2014-10-22 11:47:06.019	54981	56440	58292	57246
2014-10-22 11:47:06.025	54975	56456	58324	57201
2014-10-22 11:47:06.029	54981	56437	58291	57114
2014-10-22 11:47:06.035	54995	56436	58261	57021
2014-10-22 11:47:06.039	55001	56454	58297	56985
2014-10-22 11:47:06.045	54997	56424	58294	57019
2014-10-22 11:47:06.049	54948	56425	58260	57069
2014-10-22 11:47:06.055	54977	56418	58251	57150
2014-10-22 11:47:06.059	55024	56425	58273	57262
2014-10-22 11:47:06.065	54985	56461	58279	57304
2014-10-22 11:47:06.069	54959	56416	58267	57279
2014-10-22 11:47:06.075	54958	56423	58259	57263
2014-10-22 11:47:06.079	54961	56455	58235	57270
2014-10-22 11:47:06.085	54981	56415	58256	57249
2014-10-22 11:47:06.089	54984	56412	58264	57209
2014-10-22 11:47:06.095	54953	56422	58228	57199
2014-10-22 11:47:06.099	54961	56419	58262	57169
2014-10-22 11:47:06.105	54988	56412	58291	57122
2014-10-22 11:47:06.109	54982	56424	58269	57062
2014-10-22 11:47:06.115	54958	56439	58279	56981
2014-10-22 11:47:06.119	54950	56417	58298	56956
2014-10-22 11:47:06.125	54996	56420	58314	57025
2014-10-22 11:47:06.130	54963	56417	58339	57127
2014-10-22 11:47:06.134	54936	56410	58323	57209
2014-10-22 11:47:06.140	54993	56426	58319	57253
2014-10-22 11:47:06.144	54953	56403	58325	57273
2014-10-22 11:47:06.150	54946	56391	58304	57287
2014-10-22 11:47:06.154	54960	56406	58329	57222
2014-10-22 11:47:06.160	54949	56407	58327	57158
2014-10-22 11:47:06.164	54969	56395	58294	57176
2014-10-22 11:47:06.170	54908	56407	58294	57169
2014-10-22 11:47:06.174	54921	56413	58291	57156
2014-10-22 11:47:06.180	54969	56379	58295	57141
2014-10-22 11:47:06.184	54927	56398	58291	57082
2014-10-22 11:47:06.190	54936	56411	58281	57074
2014-10-22 11:47:06.194	54927	56379	58257	57100
2014-10-22 11:47:06.200	54926	56392	58238	57105
2014-10-22 11:47:06.204	54959	56415	58251	57122
2014-10-22 11:47:06.210	54930	56400	58247	57126
2014-10-22 11:47:06.214	54928	56367	58265	57093
2014-10-22 11:47:06.220	54938	56381	58296	57105
2014-10-22 11:47:06.224	54927	56420	58284	57130
2014-10-22 11:47:06.230	54946	56397	58261	57097
2014-10-22 11:47:06.234	54926	56372	58243	57108
2014-10-22 11:47:06.240	54914	56402	58250	57187
2014-10-22 11:47:06.244	54943	56382	58258	57242
2014-10-22 11:47:06.250	54940	56362	58237	57246
2014-10-22 11:47:06.255	54943	56404	58225	57235
2014-10-22 11:47:06.259	54906	56388	58230	57231
2014-10-22 11:47:06.265	54911	56357	58216	57186
2014-10-22 11:47:06.269	54963	56365	58198	57073
2014-10-22 11:47:06.275	54927	56390	58215	56992
2014-10-22 11:47:06.279	54913	56385	58216	56962
2014-10-22 11:47:06.285	54921	56362	58189	56960
2014-10-22 11:47:06.289	54927	56389	58216	57021
2014-10-22 11:47:06.295	54950	56391	58252	57047
2014-10-22 11:47:06.299	54920	56373	58236	57076
2014-10-22 11:47:06.305	54920	56355	58226	57166
2014-10-22 11:47:06.309	54927	56344	58254	57178
2014-10-22 11:47:06.315	54912	56375	58282	57192
2014-10-22 11:47:06.319	54924	56365	58295	57226
2014-10-22 11:47:06.325	54909	56336	58299	57224
2014-10-22 11:47:06.329	54910	56358	58301	57232
2014-10-22 11:47:06.335	54935	56364	58300	57169
2014-10-22 11:47:06.339	54918	56349	58253	57071
2014-10-22 11:47:06.345	54893	56375	58226	57043
2014-10-22 11:47:06.349	54878	56367	58242	57043
2014-10-22 11:47:06.355	54897	56341	58234	57017
2014-10-22 11:47:06.359	54927	56365	58233	57034
2014-10-22 11:47:06.365	54887	56356	58221	57111
2014-10-22 11:47:06.369	54887	56350	58211	57117
2014-10-22 11:47:06.375	54913	56350	58239	57098
2014-10-22 11:47:06.380	54885	56325	58255	57099
2014-10-22 11:47:06.384	54905	56345	58279	57082
2014-10-22 11:47:06.390	54902	56368	58283	57098
2014-10-22 11:47:06.394	54889	56345	58239	57089
2014-10-22 11:47:06.400	54899	56335	58243	57085
2014-10-22 11:47:06.404	54864	56339	58253	57107
2014-10-22 11:47:06.410	54895	56322	58220	57095
2014-10-22 11:47:06.414	54896	56342	58212	57104
2014-10-22 11:47:06.420	54846	56353	58217	57053
2014-10-22 11:47:06.424	54892	56328	58224	56963
2014-10-22 11:47:06.430	54875	56330	58224	56977
2014-10-22 11:47:06.434	54862	56319	58223	57035
2014-10-22 11:47:06.440	54899	56314	58240	57090
2014-10-22 11:47:06.444	54863	56331	58219	57156
2014-10-22 11:47:06.450	54860	56317	58185	57190
2014-10-22 11:47:06.454	54846	56327	58198	57150
2014-10-22 11:47:06.460	54853	56336	58206	57096
2014-10-22 11:47:06.464	54886	56307	58207	57038
2014-10-22 11:47:06.470	54841	56307	58220	57001
2014-10-22 11:47:06.474	54851	56315	58218	57028
2014-10-22 11:47:06.480	54856	56314	58219	57068
2014-10-22 11:47:06.484	54851	56309	58191	57115
2014-10-22 11:47:06.490	54874	56303	58213	57088
2014-10-22 11:47:06.494	54844	56302	58249	57015
2014-10-22 11:47:06.500	54852	56311	58181	56965
2014-10-22 11:47:06.505	54849	56314	58185	56920
2014-10-22 11:47:06.509	54842	56302	58213	56949
2014-10-22 11:47:06.515	54885	56319	58176	57003
2014-10-22 11:47:06.519	54861	56303	58192	57021
2014-10-22 11:47:06.525	54831	56285	58193	57073
2014-10-22 11:47:06.529	54854	56302	58180	57149
2014-10-22 11:47:06.535	54845	56286	58192	57140
2014-10-22 11:47:06.539	54848	56290	58172	57075
2014-10-22 11:47:06.545	54833	56288	58155	57026
2014-10-22 11:47:06.549	54820	56304	58189	56978
2014-10-22 11:47:06.555	54859	56319	58212	56986
2014-10-22 11:47:06.559	54838	56281	58204	57026
2014-10-22 11:47:06.565	54828	56289	58192	57018
2014-10-22 11:47:06.569	54822	56300	58172	56997
2014-10-22 11:47:06.575	54791	56294	58175	57012
2014-10-22 11:47:06.579	54856	56276	58185	57051
2014-10-22 11:47:06.585	54858	56258	58181	57072
2014-10-22 11:47:06.589	54804	56279	58193	57090
2014-10-22 11:47:06.595	54813	56283	58199	57078
2014-10-22 11:47:06.599	54811	56264	58185	57058
2014-10-22 11:47:06.605	54838	56264	58169	57056
2014-10-22 11:47:06.609	54833	56292	58142	57002
2014-10-22 11:47:06.615	54789	56273	58129	56933
2014-10-22 11:47:06.619	54829	56250	58172	56931
2014-10-22 11:47:06.625	54849	56250	58175	56968
2014-10-22 11:47:06.630	54810	56252	58139	56962
2014-10-22 11:47:06.634	54805	56280	58156	56924
2014-10-22 11:47:06.640	54817	56257	58175	56945
2014-10-22 11:47:06.644	54800	56247	58165	57003
2014-10-22 11:47:06.650	54803	56262	58134	57005
2014-10-22 11:47:06.654	54826	56260	58146	56971
2014-10-22 11:47:06.660	54799	56252	58157	56987
2014-10-22 11:47:06.664	54789	56240	58118	57005
2014-10-22 11:47:06.670	54792	56251	58153	57001
2014-10-22 11:47:06.674	54793	56252	58190	57037
2014-10-22 11:47:06.680	54814	56244	58175	57084
2014-10-22 11:47:06.684	54771	56239	58169	57106
2014-10-22 11:47:06.690	54761	56261	58159	57080
2014-10-22 11:47:06.694	54819	56254	58165	57023
2014-10-22 11:47:06.700	54805	56244	58141	56997
2014-10-22 11:47:06.704	54766	56250	58133	56990
2014-10-22 11:47:06.710	54787	56221	58150	56981
2014-10-22 11:47:06.714	54786	56243	58115	56988
2014-10-22 11:47:06.720	54768	56261	58116	57002
2014-10-22 11:47:06.724	54800	56243	58138	56959
2014-10-22 11:47:06.730	54793	56237	58134	56898
2014-10-22 11:47:06.734	54793	56243	58133	56880
2014-10-22 11:47:06.740	54790	56252	58133	56867
2014-10-22 11:47:06.744	54750	56239	58154	56860
2014-10-22 11:47:06.750	54779	56226	58142	56862
2014-10-22 11:47:06.755	54785	56220	58096	56898
2014-10-22 11:47:06.759	54762	56236	58091	56955
2014-10-22 11:47:06.765	54759	56246	58062	56964
2014-10-22 11:47:06.769	54773	56211	58024	56959
2014-10-22 11:47:06.775	54782	56216	58044	56999
2014-10-22 11:47:06.779	54743	56234	58050	57073
2014-10-22 11:47:06.785	54757	56222	58063	57136
2014-10-22 11:47:06.789	54772	56224	58078	57148
2014-10-22 11:47:06.795	54764	56215	58054	57086
2014-10-22 11:47:06.799	54771	56222	58058	57017
2014-10-22 11:47:06.805	54742	56217	58071	56972
2014-10-22 11:47:06.809	54754	56200	58062	56868
2014-10-22 11:47:06.815	54774	56212	58046	56834
2014-10-22 11:47:06.819	54754	56204	58040	56858
2014-10-22 11:47:06.825	54734	56197	58061	56814
2014-10-22 11:47:06.829	54720	56197	58069	56833
2014-10-22 11:47:06.835	54753	56204	58081	56874
2014-10-22 11:47:06.839	54769	56192	58110	56854
2014-10-22 11:47:06.845	54732	56185	58096	56854
2014-10-22 11:47:06.849	54729	56187	58095	56899
2014-10-22 11:47:06.855	54737	56182	58100	56942
2014-10-22 11:47:06.859	54737	56205	58066	56957
2014-10-22 11:47:06.865	54750	56178	58055	56971
2014-10-22 11:47:06.869	54729	56149	58058	56964
2014-10-22 11:47:06.875	54720	56174	58060	56945
2014-10-22 11:47:06.880	54735	56198	58082	56914
2014-10-22 11:47:06.884	54713	56177	58083	56919
2014-10-22 11:47:06.890	54717	56159	58080	56997
2014-10-22 11:47:06.894	54731	56183	58086	57001
2014-10-22 11:47:06.900	54695	56176	58081	56904
2014-10-22 11:47:06.904	54701	56171	58087	56835
2014-10-22 11:47:06.910	54728	56174	58078	56883
2014-10-22 11:47:06.914	54701	56176	58091	56945
2014-10-22 11:47:06.920	54682	56167	58109	56950
2014-10-22 11:47:06.924	54686	56157	58061	56966
2014-10-22 11:47:06.930	54688	56168	58058	56960
2014-10-22 11:47:06.934	54702	56146	58075	56930
2014-10-22 11:47:06.940	54704	56133	58057	56866
2014-10-22 11:47:06.944	54689	56153	58051	56828
2014-10-22 11:47:06.950	54670	56148	58003	56869
2014-10-22 11:47:06.954	54691	56145	57966	56816
2014-10-22 11:47:06.960	54691	56140	58006	56741
2014-10-22 11:47:06.964	54667	56131	58019	56773
2014-10-22 11:47:06.970	54684	56140	57999	56796
2014-10-22 11:47:06.974	54678	56135	58022	56790
2014-10-22 11:47:06.980	54682	56132	58032	56817
2014-10-22 11:47:06.984	54676	56138	58018	56883
2014-10-22 11:47:06.990	54660	56142	58006	56921
2014-10-22 11:47:06.994	54667	56139	57981	56926
2014-10-22 11:47:07.000	54644	56113	57997	56978
2014-10-22 11:47:07.005	54683	56126	58016	57029
2014-10-22 11:47:07.009	54686	56143	57992	57036
2014-10-22 11:47:07.015	54625	56108	57985	57001
2014-10-22 11:47:07.019	54653	56105	57994	56928
2014-10-22 11:47:07.025	54669	56121	57985	56880
2014-10-22 11:47:07.029	54668	56117	57966	56810
2014-10-22 11:47:07.035	54650	56109	57959	56744
2014-10-22 11:47:07.039	54611	56128	57986	56786
2014-10-22 11:47:07.045	54648	56137	58001	56803
2014-10-22 11:47:07.049	54694	56106	57987	56731
2014-10-22 11:47:07.055	54658	56109	57977	56712
2014-10-22 11:47:07.059	54609	56102	57964	56748
2014-10-22 11:47:07.065	54643	56087	57967	56762
2014-10-22 11:47:07.069	54661	56131	57970	56769
2014-10-22 11:47:07.075	54636	56115	57978	56777
2014-10-22 11:47:07.079	54638	56098	58001	56811
2014-10-22 11:47:07.085	54624	56115	57991	56884
2014-10-22 11:47:07.089	54643	56088	57986	56915
2014-10-22 11:47:07.095	54633	56079	58000	56924
2014-10-22 11:47:07.099	54603	56084	57973	56986
2014-10-22 11:47:07.105	54647	56110	57943	57007
2014-10-22 11:47:07.109	54641	56088	57942	56911
2014-10-22 11:47:07.115	54598	56065	57927	56832
2014-10-22 11:47:07.119	54593	56091	57926	56801
2014-10-22 11:47:07.125	54623	56085	57925	56750
2014-10-22 11:47:07.130	54615	56106	57915	56724
2014-10-22 11:47:07.134	54586	56099	57953	56724
2014-10-22 11:47:07.140	54608	56081	57967	56711
2014-10-22 11:47:07.144	54612	56078	57934	56727
2014-10-22 11:47:07.150	54611	56068	57917	56708
2014-10-22 11:47:07.154	54575	56086	57926	56633
2014-10-22 11:47:07.160	54575	56082	57949	56670
2014-10-22 11:47:07.164	54626	56079	57957	56778
2014-10-22 11:47:07.170	54608	56073	57952	56814
2014-10-22 11:47:07.174	54578	56063	57930	56867
2014-10-22 11:47:07.180	54555	56071	57937	56939
2014-10-22 11:47:07.184	54597	56072	57930	56948
2014-10-22 11:47:07.190	54602	56062	57898	56920
2014-10-22 11:47:07.194	54560	56052	57915	56862
2014-10-22 11:47:07.200	54605	56055	57897	56848
2014-10-22 11:47:07.204	54570	56044	57900	56843
2014-10-22 11:47:07.210	54555	56044	57961	56746
2014-10-22 11:47:07.214	54597	56047	57965	56683
2014-10-22 11:47:07.220	54564	56041	57939	56682
2014-10-22 11:47:07.224	54569	56045	57943	56647
2014-10-22 11:47:07.230	54559	56065	57926	56613
2014-10-22 11:47:07.234	54534	56061	57889	56623
2014-10-22 11:47:07.240	54563	56027	57895	56680
2014-10-22 11:47:07.244	54566	56046	57867	56720
2014-10-22 11:47:07.250	54549	56041	57861	56742
2014-10-22 11:47:07.255	54536	56006	57899	56833
2014-10-22 11:47:07.259	54562	56041	57912	56845
2014-10-22 11:47:07.265	54568	56040	57919	56778
2014-10-22 11:47:07.269	54518	56009	57871	56812
2014-10-22 11:47:07.275	54516	56026	57864	56813
2014-10-22 11:47:07.279	54546	56038	57898	56783
2014-10-22 11:47:07.285	54553	56029	57882	56759
2014-10-22 11:47:07.289	54528	56010	57879	56731
2014-10-22 11:47:07.295	54519	56015	57880	56784
2014-10-22 11:47:07.299	54547	56025	57878	56732
2014-10-22 11:47:07.305	54569	56001	57865	56609
2014-10-22 11:47:07.309	54536	55999	57859	56608
2014-10-22 11:47:07.315	54485	56005	57869	56667
2014-10-22 11:47:07.319	54534	56001	57847	56705
2014-10-22 11:47:07.325	54559	55998	57845	56735
2014-10-22 11:47:07.329	54506	55992	57865	56786
2014-10-22 11:47:07.335	54488	56008	57888	56773
2014-10-22 11:47:07.339	54496	56007	57893	56703
2014-10-22 11:47:07.345	54541	55991	57859	56680
2014-10-22 11:47:07.349	54547	55996	57864	56664
2014-10-22 11:47:07.355	54487	55995	57866	56664
2014-10-22 11:47:07.359	54492	55981	57837	56744
2014-10-22 11:47:07.365	54518	55983	57858	56791
2014-10-22 11:47:07.369	54514	56001	57849	56714
2014-10-22 11:47:07.375	54513	55983	57823	56703
2014-10-22 11:47:07.380	54484	55964	57830	56751
2014-10-22 11:47:07.384	54488	55996	57814	56725
2014-10-22 11:47:07.390	54537	56006	57811	56699
2014-10-22 11:47:07.394	54508	55992	57822	56682
2014-10-22 11:47:07.400	54478	55997	57821	56709
2014-10-22 11:47:07.404	54488	55977	57813	56738
2014-10-22 11:47:07.410	54485	55973	57816	56673
2014-10-22 11:47:07.414	54506	55992	57826	56627
2014-10-22 11:47:07.420	54485	55975	57820	56605
2014-10-22 11:47:07.424	54454	55967	57795	56565
2014-10-22 11:47:07.430	54468	55970	57798	56548
2014-10-22 11:47:07.434	54464	55959	57831	56621
2014-10-22 11:47:07.440	54492	55968	57824	56754
2014-10-22 11:47:07.444	54511	55975	57805	56781
2014-10-22 11:47:07.450	54444	55966	57823	56742
2014-10-22 11:47:07.454	54439	55958	57865	56720
2014-10-22 11:47:07.460	54486	55959	57878	56705
2014-10-22 11:47:07.464	54460	55966	57848	56696
2014-10-22 11:47:07.470	54444	55949	57820	56689
2014-10-22 11:47:07.474	54455	55952	57817	56680
2014-10-22 11:47:07.480	54461	55981	57829	56667
2014-10-22 11:47:07.484	54464	55952	57803	56672
2014-10-22 11:47:07.490	54445	55940	57793	56668
2014-10-22 11:47:07.494	54464	55970	57813	56629
2014-10-22 11:47:07.500	54451	55955	57811	56599
2014-10-22 11:47:07.505	54441	55940	57792	56590
2014-10-22 11:47:07.509	54459	55955	57774	56576
2014-10-22 11:47:07.515	54433	55953	57778	56575
2014-10-22 11:47:07.519	54460	55952	57767	56616
2014-10-22 11:47:07.525	54422	55952	57768	56631
2014-10-22 11:47:07.529	54440	55936	57787	56622
2014-10-22 11:47:07.535	54513	55929	57764	56643
2014-10-22 11:47:07.539	54428	55935	57753	56668
2014-10-22 11:47:07.545	54418	55952	57757	56717
2014-10-22 11:47:07.549	54450	55952	57760	56746
2014-10-22 11:47:07.555	54467	55927	57774	56722
2014-10-22 11:47:07.559	54443	55936	57760	56708
2014-10-22 11:47:07.565	54393	55941	57752	56695
2014-10-22 11:47:07.569	54457	55933	57758	56642
2014-10-22 11:47:07.575	54436	55936	57756	56604
2014-10-22 11:47:07.579	54409	55926	57763	56592
2014-10-22 11:47:07.585	54445	55931	57772	56560
2014-10-22 11:47:07.589	54441	55924	57781	56537
2014-10-22 11:47:07.595	54433	55909	57786	56534
2014-10-22 11:47:07.599	54383	55937	57815	56568
2014-10-22 11:47:07.605	54425	55940	57794	56586
2014-10-22 11:47:07.609	54473	55916	57771	56589
2014-10-22 11:47:07.615	54381	55915	57787	56676
2014-10-22 11:47:07.619	54382	55932	57761	56718
2014-10-22 11:47:07.625	54458	55919	57776	56684
2014-10-22 11:47:07.630	54437	55899	57759	56636
2014-10-22 11:47:07.634	54395	55939	57750	56592
2014-10-22 11:47:07.640	54404	55930	57797	56612
2014-10-22 11:47:07.644	54431	55885	57760	56606
2014-10-22 11:47:07.650	54436	55908	57769	56588
2014-10-22 11:47:07.654	54401	55928	57782	56598
2014-10-22 11:47:07.660	54401	55918	57745	56643
2014-10-22 11:47:07.664	54426	55918	57756	56691
2014-10-22 11:47:07.670	54395	55927	57733	56649
2014-10-22 11:47:07.674	54420	55929	57705	56617
2014-10-22 11:47:07.680	54429	55912	57730	56589
2014-10-22 11:47:07.684	54374	55908	57755	56529
2014-10-22 11:47:07.690	54395	55932	57750	56525
2014-10-22 11:47:07.694	54391	55914	57730	56537
2014-10-22 11:47:07.700	54399	55903	57747	56555
2014-10-22 11:47:07.704	54419	55917	57753	56577
2014-10-22 11:47:07.710	54378	55899	57731	56596
2014-10-22 11:47:07.714	54382	55904	57757	56613
2014-10-22 11:47:07.720	54393	55897	57758	56633
2014-10-22 11:47:07.724	54411	55903	57738	56683
2014-10-22 11:47:07.730	54395	55921	57742	56683
2014-10-22 11:47:07.734	54374	55898	57717	56618
2014-10-22 11:47:07.740	54424	55897	57739	56573
2014-10-22 11:47:07.744	54411	55909	57746	56587
2014-10-22 11:47:07.750	54392	55917	57726	56575
2014-10-22 11:47:07.755	54388	55899	57781	56566
2014-10-22 11:47:07.759	54398	55895	57769	56626
2014-10-22 11:47:07.765	54420	55916	57746	56610
2014-10-22 11:47:07.769	54371	55906	57761	56505
2014-10-22 11:47:07.775	54384	55899	57720	56441
2014-10-22 11:47:07.779	54402	55898	57717	56487
2014-10-22 11:47:07.785	54369	55916	57730	56567
2014-10-22 11:47:07.789	54394	55907	57717	56613
2014-10-22 11:47:07.795	54384	55881	57723	56645
2014-10-22 11:47:07.799	54396	55905	57734	56630
2014-10-22 11:47:07.805	54403	55906	57742	56646
2014-10-22 11:47:07.809	54336	55886	57735	56661
2014-10-22 11:47:07.815	54394	55893	57733	56620
2014-10-22 11:47:07.819	54438	55902	57726	56600
2014-10-22 11:47:07.825	54382	55908	57708	56588
2014-10-22 11:47:07.829	54378	55903	57713	56563
2014-10-22 11:47:07.835	54395	55884	57714	56536
2014-10-22 11:47:07.839	54407	55907	57703	56553
2014-10-22 11:47:07.845	54368	55912	57705	56534
2014-10-22 11:47:07.849	54366	55891	57739	56467
2014-10-22 11:47:07.855	54409	55904	57760	56482
2014-10-22 11:47:07.859	54417	55897	57734	56530
2014-10-22 11:47:07.865	54384	55896	57724	56574
2014-10-22 11:47:07.869	54369	55895	57745	56598
2014-10-22 11:47:07.875	54441	55896	57731	56607
2014-10-22 11:47:07.880	54418	55911	57722	56648
2014-10-22 11:47:07.884	54348	55901	57749	56658
2014-10-22 11:47:07.890	54362	55890	57747	56645
2014-10-22 11:47:07.894	54384	55892	57729	56647
2014-10-22 11:47:07.900	54417	55919	57740	56632
2014-10-22 11:47:07.904	54387	55897	57749	56604
2014-10-22 11:47:07.910	54359	55868	57710	56576
2014-10-22 11:47:07.914	54400	55912	57709	56527
2014-10-22 11:47:07.920	54400	55913	57732	56463
2014-10-22 11:47:07.924	54388	55882	57702	56461
2014-10-22 11:47:07.930	54368	55897	57694	56535
2014-10-22 11:47:07.934	54375	55901	57726	56561
2014-10-22 11:47:07.940	54430	55893	57734	56541
2014-10-22 11:47:07.944	54385	55891	57710	56561
2014-10-22 11:47:07.950	54352	55901	57734	56578
2014-10-22 11:47:07.954	54407	55918	57746	56623
2014-10-22 11:47:07.960	54410	55899	57703	56697
2014-10-22 11:47:07.964	54389	55902	57724	56713
2014-10-22 11:47:07.970	54387	55910	57753	56697
2014-10-22 11:47:07.974	54402	55882	57759	56668
2014-10-22 11:47:07.980	54380	55893	57763	56621
2014-10-22 11:47:07.984	54382	55900	57739	56530
2014-10-22 11:47:07.990	54411	55883	57743	56468
2014-10-22 11:47:07.994	54375	55897	57756	56491
[truncated: 10,400 more rows]
