# Supplementary material for: Seismic monitoring of small alpine rockfalls – validity, precision and limitations
Source: Copernicus journal article supplement (doi:10.5194/esurf-5-653-2017), 2017-10-16
Supplement: Supplementary file 2 [file esurf-5-653-2017-supplement.zip › event_6.txt]

Time	LAU02	LAU03	LAU04	LAU05
2014-10-02 17:59:20.005	61914	61133	63109	65474
2014-10-02 17:59:20.009	61928	61123	63093	65470
2014-10-02 17:59:20.015	61910	61116	63091	65443
2014-10-02 17:59:20.019	61910	61121	63090	65449
2014-10-02 17:59:20.025	61935	61117	63067	65450
2014-10-02 17:59:20.029	61921	61123	63071	65406
2014-10-02 17:59:20.035	61900	61119	63088	65359
2014-10-02 17:59:20.039	61924	61115	63080	65348
2014-10-02 17:59:20.045	61935	61125	63075	65377
2014-10-02 17:59:20.049	61914	61123	63077	65419
2014-10-02 17:59:20.055	61920	61140	63081	65471
2014-10-02 17:59:20.059	61927	61143	63095	65530
2014-10-02 17:59:20.065	61910	61122	63101	65556
2014-10-02 17:59:20.069	61910	61124	63107	65577
2014-10-02 17:59:20.075	61922	61135	63128	65599
2014-10-02 17:59:20.079	61930	61132	63121	65591
2014-10-02 17:59:20.085	61929	61112	63108	65553
2014-10-02 17:59:20.089	61923	61116	63106	65498
2014-10-02 17:59:20.095	61923	61134	63087	65459
2014-10-02 17:59:20.099	61926	61138	63076	65438
2014-10-02 17:59:20.105	61931	61141	63089	65424
2014-10-02 17:59:20.109	61929	61134	63101	65423
2014-10-02 17:59:20.115	61929	61139	63101	65429
2014-10-02 17:59:20.119	61934	61131	63103	65438
2014-10-02 17:59:20.125	61929	61121	63119	65443
2014-10-02 17:59:20.130	61924	61130	63122	65433
2014-10-02 17:59:20.134	61933	61123	63111	65408
2014-10-02 17:59:20.140	61936	61126	63104	65411
2014-10-02 17:59:20.144	61925	61140	63108	65464
2014-10-02 17:59:20.150	61926	61137	63115	65538
2014-10-02 17:59:20.154	61926	61122	63109	65588
2014-10-02 17:59:20.160	61934	61117	63096	65613
2014-10-02 17:59:20.164	61940	61111	63076	65578
2014-10-02 17:59:20.170	61930	61106	63063	65503
2014-10-02 17:59:20.174	61927	61132	63070	65480
2014-10-02 17:59:20.180	61928	61128	63079	65456
2014-10-02 17:59:20.184	61932	61133	63067	65440
2014-10-02 17:59:20.190	61924	61143	63066	65453
2014-10-02 17:59:20.194	61932	61156	63074	65450
2014-10-02 17:59:20.200	61955	61171	63078	65468
2014-10-02 17:59:20.204	61929	61130	63109	65478
2014-10-02 17:59:20.210	61914	61145	63124	65475
2014-10-02 17:59:20.214	61931	61152	63121	65456
2014-10-02 17:59:20.220	61945	61127	63142	65431
2014-10-02 17:59:20.224	61938	61156	63152	65440
2014-10-02 17:59:20.230	61926	61145	63137	65448
2014-10-02 17:59:20.234	61945	61138	63112	65485
2014-10-02 17:59:20.240	61950	61132	63106	65510
2014-10-02 17:59:20.244	61933	61136	63111	65484
2014-10-02 17:59:20.250	61932	61152	63103	65477
2014-10-02 17:59:20.255	61947	61114	63105	65496
2014-10-02 17:59:20.259	61948	61126	63105	65532
2014-10-02 17:59:20.265	61927	61129	63103	65546
2014-10-02 17:59:20.269	61927	61105	63104	65539
2014-10-02 17:59:20.275	61940	61128	63098	65545
2014-10-02 17:59:20.279	61932	61140	63103	65549
2014-10-02 17:59:20.285	61927	61144	63110	65537
2014-10-02 17:59:20.289	61942	61138	63113	65510
2014-10-02 17:59:20.295	61954	61137	63107	65494
2014-10-02 17:59:20.299	61941	61145	63081	65461
2014-10-02 17:59:20.305	61918	61138	63064	65414
2014-10-02 17:59:20.309	61925	61142	63073	65402
2014-10-02 17:59:20.315	61952	61151	63071	65402
2014-10-02 17:59:20.319	61947	61153	63066	65416
2014-10-02 17:59:20.325	61932	61160	63083	65431
2014-10-02 17:59:20.329	61939	61161	63102	65445
2014-10-02 17:59:20.335	61944	61142	63118	65496
2014-10-02 17:59:20.339	61936	61139	63114	65532
2014-10-02 17:59:20.345	61930	61142	63087	65542
2014-10-02 17:59:20.349	61933	61125	63091	65549
2014-10-02 17:59:20.355	61947	61130	63101	65541
2014-10-02 17:59:20.359	61948	61129	63108	65534
2014-10-02 17:59:20.365	61939	61135	63115	65527
2014-10-02 17:59:20.369	61949	61137	63110	65526
2014-10-02 17:59:20.375	61950	61122	63131	65517
2014-10-02 17:59:20.380	61939	61149	63141	65507
2014-10-02 17:59:20.384	61945	61142	63124	65524
2014-10-02 17:59:20.390	61952	61138	63121	65514
2014-10-02 17:59:20.394	61943	61158	63116	65498
2014-10-02 17:59:20.400	61944	61143	63115	65481
2014-10-02 17:59:20.404	61935	61143	63118	65445
2014-10-02 17:59:20.410	61932	61142	63117	65424
2014-10-02 17:59:20.414	61951	61142	63115	65416
2014-10-02 17:59:20.420	61950	61143	63125	65432
2014-10-02 17:59:20.424	61943	61145	63129	65448
2014-10-02 17:59:20.430	61933	61152	63123	65465
2014-10-02 17:59:20.434	61930	61147	63128	65468
2014-10-02 17:59:20.440	61930	61140	63125	65459
2014-10-02 17:59:20.444	61926	61125	63122	65482
2014-10-02 17:59:20.450	61944	61135	63110	65503
2014-10-02 17:59:20.454	61945	61134	63103	65547
2014-10-02 17:59:20.460	61952	61118	63102	65601
2014-10-02 17:59:20.464	61952	61133	63092	65619
2014-10-02 17:59:20.470	61937	61137	63113	65621
2014-10-02 17:59:20.474	61954	61140	63114	65596
2014-10-02 17:59:20.480	61944	61151	63124	65561
2014-10-02 17:59:20.484	61943	61147	63142	65501
2014-10-02 17:59:20.490	61950	61146	63119	65449
2014-10-02 17:59:20.494	61941	61152	63133	65433
2014-10-02 17:59:20.500	61944	61140	63149	65397
2014-10-02 17:59:20.505	61936	61114	63131	65390
2014-10-02 17:59:20.509	61942	61127	63134	65415
2014-10-02 17:59:20.515	61951	61152	63139	65427
2014-10-02 17:59:20.519	61932	61148	63130	65450
2014-10-02 17:59:20.525	61946	61147	63125	65475
2014-10-02 17:59:20.529	61980	61149	63105	65489
2014-10-02 17:59:20.535	61948	61149	63096	65516
2014-10-02 17:59:20.539	61937	61134	63106	65558
2014-10-02 17:59:20.545	61962	61123	63094	65576
2014-10-02 17:59:20.549	61947	61142	63103	65568
2014-10-02 17:59:20.555	61944	61131	63100	65566
2014-10-02 17:59:20.559	61948	61119	63075	65557
2014-10-02 17:59:20.565	61942	61130	63099	65535
2014-10-02 17:59:20.569	61940	61135	63118	65511
2014-10-02 17:59:20.575	61944	61145	63117	65499
2014-10-02 17:59:20.579	61945	61139	63115	65475
2014-10-02 17:59:20.585	61948	61145	63094	65452
2014-10-02 17:59:20.589	61946	61143	63096	65461
2014-10-02 17:59:20.595	61935	61126	63121	65474
2014-10-02 17:59:20.599	61951	61140	63111	65468
2014-10-02 17:59:20.605	61958	61149	63087	65472
2014-10-02 17:59:20.609	61946	61162	63102	65481
2014-10-02 17:59:20.615	61945	61161	63117	65485
2014-10-02 17:59:20.619	61961	61146	63134	65504
2014-10-02 17:59:20.625	61950	61148	63165	65510
2014-10-02 17:59:20.630	61932	61133	63168	65499
2014-10-02 17:59:20.634	61959	61128	63171	65491
2014-10-02 17:59:20.640	61952	61128	63163	65483
2014-10-02 17:59:20.644	61939	61110	63134	65507
2014-10-02 17:59:20.650	61952	61121	63137	65556
2014-10-02 17:59:20.654	61946	61132	63135	65562
2014-10-02 17:59:20.660	61955	61124	63116	65564
2014-10-02 17:59:20.664	61955	61126	63120	65561
2014-10-02 17:59:20.670	61953	61140	63122	65515
2014-10-02 17:59:20.674	61953	61141	63106	65494
2014-10-02 17:59:20.680	61936	61130	63110	65491
2014-10-02 17:59:20.684	61957	61126	63115	65475
2014-10-02 17:59:20.690	61975	61134	63099	65463
2014-10-02 17:59:20.694	61944	61144	63104	65470
2014-10-02 17:59:20.700	61944	61131	63104	65480
2014-10-02 17:59:20.704	61962	61130	63091	65485
2014-10-02 17:59:20.710	61951	61148	63078	65504
2014-10-02 17:59:20.714	61936	61149	63086	65512
2014-10-02 17:59:20.720	61940	61150	63123	65504
2014-10-02 17:59:20.724	61952	61148	63131	65492
2014-10-02 17:59:20.730	61952	61142	63123	65466
2014-10-02 17:59:20.734	61947	61138	63126	65428
2014-10-02 17:59:20.740	61942	61142	63118	65440
2014-10-02 17:59:20.744	61953	61136	63131	65465
2014-10-02 17:59:20.750	61955	61127	63145	65474
2014-10-02 17:59:20.755	61932	61138	63132	65530
2014-10-02 17:59:20.759	61941	61136	63133	65580
2014-10-02 17:59:20.765	61951	61135	63134	65584
2014-10-02 17:59:20.769	61940	61129	63122	65571
2014-10-02 17:59:20.775	61935	61130	63112	65537
2014-10-02 17:59:20.779	61951	61145	63104	65510
2014-10-02 17:59:20.785	61953	61119	63097	65512
2014-10-02 17:59:20.789	61930	61128	63097	65540
2014-10-02 17:59:20.795	61949	61146	63105	65559
2014-10-02 17:59:20.799	61963	61122	63116	65528
2014-10-02 17:59:20.805	61943	61151	63114	65472
2014-10-02 17:59:20.809	61943	61160	63110	65435
2014-10-02 17:59:20.815	61950	61135	63123	65423
2014-10-02 17:59:20.819	61941	61130	63109	65420
2014-10-02 17:59:20.825	61934	61119	63089	65422
2014-10-02 17:59:20.829	61938	61121	63111	65443
2014-10-02 17:59:20.835	61945	61119	63120	65470
2014-10-02 17:59:20.839	61952	61118	63124	65475
2014-10-02 17:59:20.845	61947	61126	63130	65472
2014-10-02 17:59:20.849	61946	61118	63110	65486
2014-10-02 17:59:20.855	61953	61119	63111	65507
2014-10-02 17:59:20.859	61955	61128	63127	65517
2014-10-02 17:59:20.865	61957	61120	63125	65530
2014-10-02 17:59:20.869	61953	61110	63125	65559
2014-10-02 17:59:20.875	61946	61114	63110	65566
2014-10-02 17:59:20.880	61926	61114	63095	65540
2014-10-02 17:59:20.884	61927	61135	63114	65527
2014-10-02 17:59:20.890	61957	61149	63120	65538
2014-10-02 17:59:20.894	61943	61130	63111	65522
2014-10-02 17:59:20.900	61936	61141	63125	65480
2014-10-02 17:59:20.904	61954	61147	63140	65465
2014-10-02 17:59:20.910	61941	61116	63140	65462
2014-10-02 17:59:20.914	61932	61119	63129	65457
2014-10-02 17:59:20.920	61940	61124	63120	65463
2014-10-02 17:59:20.924	61939	61118	63129	65453
2014-10-02 17:59:20.930	61950	61124	63121	65441
2014-10-02 17:59:20.934	61956	61114	63127	65445
2014-10-02 17:59:20.940	61943	61120	63145	65475
2014-10-02 17:59:20.944	61948	61129	63124	65509
2014-10-02 17:59:20.950	61945	61107	63102	65532
2014-10-02 17:59:20.954	61927	61104	63110	65554
2014-10-02 17:59:20.960	61938	61127	63110	65536
2014-10-02 17:59:20.964	61954	61122	63107	65514
2014-10-02 17:59:20.970	61934	61114	63114	65492
2014-10-02 17:59:20.974	61918	61125	63110	65469
2014-10-02 17:59:20.980	61936	61132	63114	65473
2014-10-02 17:59:20.984	61940	61143	63112	65463
2014-10-02 17:59:20.990	61931	61129	63101	65471
2014-10-02 17:59:20.994	61933	61117	63126	65488
2014-10-02 17:59:21.000	61935	61131	63137	65501
2014-10-02 17:59:21.005	61941	61119	63127	65531
2014-10-02 17:59:21.009	61935	61107	63138	65523
2014-10-02 17:59:21.015	61925	61103	63144	65514
2014-10-02 17:59:21.019	61930	61114	63136	65491
2014-10-02 17:59:21.025	61938	61107	63142	65475
2014-10-02 17:59:21.029	61942	61097	63138	65488
2014-10-02 17:59:21.035	61939	61126	63128	65471
2014-10-02 17:59:21.039	61935	61116	63123	65486
2014-10-02 17:59:21.045	61930	61105	63113	65493
2014-10-02 17:59:21.049	61932	61106	63114	65473
2014-10-02 17:59:21.055	61947	61097	63100	65455
2014-10-02 17:59:21.059	61955	61106	63101	65429
2014-10-02 17:59:21.065	61937	61105	63111	65429
2014-10-02 17:59:21.069	61922	61128	63104	65438
2014-10-02 17:59:21.075	61925	61128	63104	65461
2014-10-02 17:59:21.079	61936	61095	63093	65485
2014-10-02 17:59:21.085	61935	61110	63102	65516
2014-10-02 17:59:21.089	61916	61110	63113	65547
2014-10-02 17:59:21.095	61929	61097	63110	65539
2014-10-02 17:59:21.099	61941	61102	63119	65539
2014-10-02 17:59:21.105	61931	61102	63126	65500
2014-10-02 17:59:21.109	61935	61099	63144	65448
2014-10-02 17:59:21.115	61924	61093	63135	65450
2014-10-02 17:59:21.119	61923	61099	63133	65456
2014-10-02 17:59:21.125	61931	61111	63148	65460
2014-10-02 17:59:21.130	61923	61109	63126	65484
2014-10-02 17:59:21.134	61930	61106	63124	65493
2014-10-02 17:59:21.140	61935	61093	63130	65486
2014-10-02 17:59:21.144	61920	61084	63107	65485
2014-10-02 17:59:21.150	61915	61100	63114	65482
2014-10-02 17:59:21.154	61929	61105	63132	65471
2014-10-02 17:59:21.160	61934	61093	63143	65466
2014-10-02 17:59:21.164	61928	61105	63152	65464
2014-10-02 17:59:21.170	61938	61116	63128	65452
2014-10-02 17:59:21.174	61933	61106	63113	65451
2014-10-02 17:59:21.180	61913	61099	63101	65479
2014-10-02 17:59:21.184	61922	61091	63083	65500
2014-10-02 17:59:21.190	61923	61089	63086	65481
2014-10-02 17:59:21.194	61913	61090	63088	65461
2014-10-02 17:59:21.200	61912	61090	63093	65449
2014-10-02 17:59:21.204	61921	61100	63080	65415
2014-10-02 17:59:21.210	61924	61100	63080	65415
2014-10-02 17:59:21.214	61918	61091	63098	65452
2014-10-02 17:59:21.220	61938	61094	63088	65469
2014-10-02 17:59:21.224	61943	61095	63101	65500
2014-10-02 17:59:21.230	61930	61074	63120	65533
2014-10-02 17:59:21.234	61929	61070	63119	65539
2014-10-02 17:59:21.240	61926	61082	63127	65525
2014-10-02 17:59:21.244	61910	61075	63132	65500
2014-10-02 17:59:21.250	61919	61082	63139	65477
2014-10-02 17:59:21.255	61926	61088	63139	65455
2014-10-02 17:59:21.259	61907	61093	63142	65464
2014-10-02 17:59:21.265	61923	61106	63140	65488
2014-10-02 17:59:21.269	61926	61086	63126	65491
2014-10-02 17:59:21.275	61907	61084	63121	65469
2014-10-02 17:59:21.279	61927	61089	63108	65447
2014-10-02 17:59:21.285	61920	61075	63085	65447
2014-10-02 17:59:21.289	61899	61090	63087	65423
2014-10-02 17:59:21.295	61919	61101	63101	65416
2014-10-02 17:59:21.299	61928	61097	63102	65449
2014-10-02 17:59:21.305	61917	61090	63101	65452
2014-10-02 17:59:21.309	61915	61086	63093	65430
2014-10-02 17:59:21.315	61916	61075	63100	65422
2014-10-02 17:59:21.319	61919	61073	63126	65453
2014-10-02 17:59:21.325	61918	61085	63133	65490
2014-10-02 17:59:21.329	61911	61070	63119	65490
2014-10-02 17:59:21.335	61909	61064	63109	65493
2014-10-02 17:59:21.339	61910	61067	63090	65494
2014-10-02 17:59:21.345	61917	61074	63097	65480
2014-10-02 17:59:21.349	61912	61083	63122	65481
2014-10-02 17:59:21.355	61920	61085	63100	65481
2014-10-02 17:59:21.359	61920	61085	63083	65473
2014-10-02 17:59:21.365	61913	61064	63086	65476
2014-10-02 17:59:21.369	61921	61059	63089	65473
2014-10-02 17:59:21.375	61913	61078	63107	65474
2014-10-02 17:59:21.380	61916	61082	63112	65467
2014-10-02 17:59:21.384	61913	61061	63117	65442
2014-10-02 17:59:21.390	61906	61072	63114	65441
2014-10-02 17:59:21.394	61915	61095	63112	65434
2014-10-02 17:59:21.400	61907	61072	63128	65428
2014-10-02 17:59:21.404	61909	61067	63124	65445
2014-10-02 17:59:21.410	61907	61066	63119	65436
2014-10-02 17:59:21.414	61908	61054	63117	65452
2014-10-02 17:59:21.420	61920	61057	63094	65484
2014-10-02 17:59:21.424	61918	61067	63079	65496
2014-10-02 17:59:21.430	61909	61075	63075	65499
2014-10-02 17:59:21.434	61901	61066	63089	65473
2014-10-02 17:59:21.440	61918	61059	63102	65471
2014-10-02 17:59:21.444	61916	61055	63090	65470
2014-10-02 17:59:21.450	61897	61063	63081	65463
2014-10-02 17:59:21.454	61909	61061	63074	65475
2014-10-02 17:59:21.460	61912	61052	63077	65470
2014-10-02 17:59:21.464	61893	61056	63078	65471
2014-10-02 17:59:21.470	61897	61049	63068	65439
2014-10-02 17:59:21.474	61909	61064	63070	65385
2014-10-02 17:59:21.480	61900	61069	63067	65372
2014-10-02 17:59:21.484	61907	61063	63079	65375
2014-10-02 17:59:21.490	61915	61077	63087	65408
2014-10-02 17:59:21.494	61903	61057	63079	65445
2014-10-02 17:59:21.500	61903	61050	63099	65470
2014-10-02 17:59:21.505	61903	61060	63105	65485
2014-10-02 17:59:21.509	61896	61058	63094	65477
2014-10-02 17:59:21.515	61897	61056	63103	65499
2014-10-02 17:59:21.519	61912	61042	63116	65513
2014-10-02 17:59:21.525	61905	61050	63107	65486
2014-10-02 17:59:21.529	61893	61055	63114	65491
2014-10-02 17:59:21.535	61894	61040	63138	65477
2014-10-02 17:59:21.539	61889	61040	63129	65445
2014-10-02 17:59:21.545	61908	61034	63132	65441
2014-10-02 17:59:21.549	61899	61044	63138	65420
2014-10-02 17:59:21.555	61885	61053	63124	65422
2014-10-02 17:59:21.559	61902	61039	63115	65444
2014-10-02 17:59:21.565	61897	61057	63089	65455
2014-10-02 17:59:21.569	61898	61059	63084	65470
2014-10-02 17:59:21.575	61890	61045	63108	65456
2014-10-02 17:59:21.579	61889	61048	63111	65423
2014-10-02 17:59:21.585	61895	61044	63102	65403
2014-10-02 17:59:21.589	61897	61045	63093	65396
2014-10-02 17:59:21.595	61912	61048	63078	65380
2014-10-02 17:59:21.599	61904	61047	63070	65368
2014-10-02 17:59:21.605	61903	61037	63068	65392
2014-10-02 17:59:21.609	61899	61044	63075	65419
2014-10-02 17:59:21.615	61882	61049	63086	65437
2014-10-02 17:59:21.619	61888	61031	63100	65462
2014-10-02 17:59:21.625	61891	61028	63118	65475
2014-10-02 17:59:21.630	61882	61023	63122	65493
2014-10-02 17:59:21.634	61885	61024	63120	65513
2014-10-02 17:59:21.640	61902	61026	63111	65494
2014-10-02 17:59:21.644	61892	61002	63086	65468
2014-10-02 17:59:21.650	61880	61001	63084	65452
2014-10-02 17:59:21.654	61893	61018	63096	65439
2014-10-02 17:59:21.660	61888	61027	63089	65431
2014-10-02 17:59:21.664	61878	61043	63100	65421
2014-10-02 17:59:21.670	61890	61047	63107	65430
2014-10-02 17:59:21.674	61897	61038	63088	65424
2014-10-02 17:59:21.680	61892	61037	63098	65405
2014-10-02 17:59:21.684	61895	61030	63113	65393
2014-10-02 17:59:21.690	61894	61025	63108	65383
2014-10-02 17:59:21.694	61874	61024	63091	65387
2014-10-02 17:59:21.700	61870	61039	63072	65400
2014-10-02 17:59:21.704	61889	61044	63082	65433
2014-10-02 17:59:21.710	61901	61030	63087	65448
2014-10-02 17:59:21.714	61884	61043	63070	65442
2014-10-02 17:59:21.720	61882	61031	63079	65425
2014-10-02 17:59:21.724	61898	61024	63096	65422
2014-10-02 17:59:21.730	61883	61022	63090	65446
2014-10-02 17:59:21.734	61890	61012	63075	65468
2014-10-02 17:59:21.740	61894	61042	63051	65492
2014-10-02 17:59:21.744	61873	61026	63071	65490
2014-10-02 17:59:21.750	61879	61022	63101	65464
2014-10-02 17:59:21.755	61876	61048	63098	65442
2014-10-02 17:59:21.759	61878	61028	63098	65425
2014-10-02 17:59:21.765	61887	61031	63072	65413
2014-10-02 17:59:21.769	61879	61024	63041	65422
2014-10-02 17:59:21.775	61893	61020	63075	65437
2014-10-02 17:59:21.779	61886	61024	63111	65439
2014-10-02 17:59:21.785	61871	61013	63087	65439
2014-10-02 17:59:21.789	61880	61032	63092	65415
2014-10-02 17:59:21.795	61878	61027	63094	65377
2014-10-02 17:59:21.799	61885	61013	63051	65346
2014-10-02 17:59:21.805	61878	61029	63073	65335
2014-10-02 17:59:21.809	61862	61020	63112	65361
2014-10-02 17:59:21.815	61879	61006	63125	65416
2014-10-02 17:59:21.819	61888	61004	63125	65457
2014-10-02 17:59:21.825	61872	61010	63096	65469
2014-10-02 17:59:21.829	61876	61037	63098	65467
2014-10-02 17:59:21.835	61890	61023	63094	65450
2014-10-02 17:59:21.839	61886	61009	63081	65446
2014-10-02 17:59:21.845	61870	61040	63099	65465
2014-10-02 17:59:21.849	61867	61036	63080	65484
2014-10-02 17:59:21.855	61883	61022	63068	65490
2014-10-02 17:59:21.859	61877	61022	63072	65465
2014-10-02 17:59:21.865	61873	61013	63060	65429
2014-10-02 17:59:21.869	61883	61005	63071	65421
2014-10-02 17:59:21.875	61880	61004	63068	65411
2014-10-02 17:59:21.880	61863	61019	63051	65361
2014-10-02 17:59:21.884	61853	61019	63050	65351
2014-10-02 17:59:21.890	61881	61010	63057	65380
2014-10-02 17:59:21.894	61883	61019	63070	65377
2014-10-02 17:59:21.900	61859	61008	63081	65397
2014-10-02 17:59:21.904	61865	60986	63102	65416
2014-10-02 17:59:21.910	61873	60999	63101	65387
2014-10-02 17:59:21.914	61869	61003	63105	65381
2014-10-02 17:59:21.920	61866	61009	63113	65414
2014-10-02 17:59:21.924	61875	61029	63100	65456
2014-10-02 17:59:21.930	61878	61025	63111	65460
2014-10-02 17:59:21.934	61877	61020	63105	65454
2014-10-02 17:59:21.940	61874	61010	63102	65460
2014-10-02 17:59:21.944	61875	61002	63113	65455
2014-10-02 17:59:21.950	61864	61010	63091	65458
2014-10-02 17:59:21.954	61865	61005	63071	65453
2014-10-02 17:59:21.960	61889	61007	63055	65440
2014-10-02 17:59:21.964	61870	61012	63061	65421
2014-10-02 17:59:21.970	61868	61008	63084	65393
2014-10-02 17:59:21.974	61874	61027	63097	65372
2014-10-02 17:59:21.980	61872	61018	63092	65364
2014-10-02 17:59:21.984	61886	60988	63078	65372
2014-10-02 17:59:21.990	61879	61007	63073	65388
2014-10-02 17:59:21.994	61886	61000	63062	65417
2014-10-02 17:59:22.000	61876	60981	63065	65439
2014-10-02 17:59:22.005	61864	60994	63072	65426
2014-10-02 17:59:22.009	61878	60996	63058	65410
2014-10-02 17:59:22.015	61868	61009	63052	65402
2014-10-02 17:59:22.019	61875	61017	63052	65412
2014-10-02 17:59:22.025	61868	61013	63056	65412
2014-10-02 17:59:22.029	61855	61008	63054	65401
2014-10-02 17:59:22.035	61873	61003	63063	65399
2014-10-02 17:59:22.039	61872	61002	63079	65385
2014-10-02 17:59:22.045	61861	60990	63071	65415
2014-10-02 17:59:22.049	61860	61003	63079	65457
2014-10-02 17:59:22.055	61877	61008	63115	65458
2014-10-02 17:59:22.059	61873	60993	63132	65462
2014-10-02 17:59:22.065	61860	61002	63130	65438
2014-10-02 17:59:22.069	61868	61005	63123	65414
2014-10-02 17:59:22.075	61864	60998	63105	65393
2014-10-02 17:59:22.079	61874	60988	63100	65348
2014-10-02 17:59:22.085	61863	60996	63093	65345
2014-10-02 17:59:22.089	61857	60997	63066	65367
2014-10-02 17:59:22.095	61867	60985	63053	65404
2014-10-02 17:59:22.099	61863	60997	63048	65441
2014-10-02 17:59:22.105	61878	61015	63063	65453
2014-10-02 17:59:22.109	61866	61013	63091	65465
2014-10-02 17:59:22.115	61867	61004	63089	65445
2014-10-02 17:59:22.119	61889	61006	63083	65415
2014-10-02 17:59:22.125	61861	60988	63080	65400
2014-10-02 17:59:22.130	61863	60988	63089	65386
2014-10-02 17:59:22.134	61882	61001	63104	65396
2014-10-02 17:59:22.140	61862	60990	63098	65422
2014-10-02 17:59:22.144	61861	61004	63103	65427
2014-10-02 17:59:22.150	61869	61012	63103	65418
2014-10-02 17:59:22.154	61873	61016	63096	65399
2014-10-02 17:59:22.160	61868	61024	63086	65383
2014-10-02 17:59:22.164	61858	60996	63074	65387
2014-10-02 17:59:22.170	61880	60990	63087	65413
2014-10-02 17:59:22.174	61869	61005	63094	65441
2014-10-02 17:59:22.180	61861	60987	63093	65448
2014-10-02 17:59:22.184	61877	60982	63090	65455
2014-10-02 17:59:22.190	61867	61000	63102	65433
2014-10-02 17:59:22.194	61873	61003	63117	65391
2014-10-02 17:59:22.200	61870	61011	63112	65378
2014-10-02 17:59:22.204	61875	61001	63107	65380
2014-10-02 17:59:22.210	61884	60992	63105	65398
2014-10-02 17:59:22.214	61857	61013	63105	65393
2014-10-02 17:59:22.220	61867	60990	63075	65368
2014-10-02 17:59:22.224	61882	60991	63063	65357
2014-10-02 17:59:22.230	61865	61025	63072	65360
2014-10-02 17:59:22.234	61859	61007	63063	65383
2014-10-02 17:59:22.240	61868	61014	63065	65397
2014-10-02 17:59:22.244	61880	61018	63043	65402
2014-10-02 17:59:22.250	61866	60994	63021	65421
2014-10-02 17:59:22.255	61852	61009	63041	65435
2014-10-02 17:59:22.259	61863	61012	63071	65449
2014-10-02 17:59:22.265	61878	61006	63086	65486
2014-10-02 17:59:22.269	61881	61007	63077	65502
2014-10-02 17:59:22.275	61873	61001	63064	65492
2014-10-02 17:59:22.279	61877	61019	63074	65474
2014-10-02 17:59:22.285	61883	61015	63105	65451
2014-10-02 17:59:22.289	61881	60988	63130	65420
2014-10-02 17:59:22.295	61878	60989	63134	65385
2014-10-02 17:59:22.299	61869	60993	63114	65382
2014-10-02 17:59:22.305	61876	61000	63092	65357
2014-10-02 17:59:22.309	61879	60990	63084	65352
2014-10-02 17:59:22.315	61876	60988	63087	65377
2014-10-02 17:59:22.319	61885	61005	63095	65346
2014-10-02 17:59:22.325	61881	60998	63105	65335
2014-10-02 17:59:22.329	61869	61015	63102	65352
2014-10-02 17:59:22.335	61876	61016	63089	65393
2014-10-02 17:59:22.339	61871	61001	63090	65439
2014-10-02 17:59:22.345	61870	61012	63079	65461
2014-10-02 17:59:22.349	61887	61006	63064	65466
2014-10-02 17:59:22.355	61885	61020	63070	65450
2014-10-02 17:59:22.359	61885	61016	63058	65448
2014-10-02 17:59:22.365	61876	61003	63057	65434
2014-10-02 17:59:22.369	61882	61019	63068	65428
2014-10-02 17:59:22.375	61893	61007	63059	65436
2014-10-02 17:59:22.380	61864	60999	63064	65409
2014-10-02 17:59:22.384	61879	61000	63075	65384
2014-10-02 17:59:22.390	61884	60988	63094	65394
2014-10-02 17:59:22.394	61870	60991	63100	65424
2014-10-02 17:59:22.400	61888	60995	63098	65428
2014-10-02 17:59:22.404	61877	61003	63097	65418
2014-10-02 17:59:22.410	61878	61019	63075	65426
2014-10-02 17:59:22.414	61885	61010	63076	65438
2014-10-02 17:59:22.420	61877	61001	63075	65435
2014-10-02 17:59:22.424	61870	61002	63083	65389
2014-10-02 17:59:22.430	61867	61004	63121	65355
2014-10-02 17:59:22.434	61884	61015	63128	65341
2014-10-02 17:59:22.440	61891	60999	63124	65337
2014-10-02 17:59:22.444	61885	60989	63114	65388
2014-10-02 17:59:22.450	61874	61008	63108	65438
2014-10-02 17:59:22.454	61868	61017	63115	65453
2014-10-02 17:59:22.460	61874	61013	63089	65454
2014-10-02 17:59:22.464	61874	61007	63082	65441
2014-10-02 17:59:22.470	61881	61006	63092	65418
2014-10-02 17:59:22.474	61890	61004	63088	65410
2014-10-02 17:59:22.480	61886	61002	63100	65435
2014-10-02 17:59:22.484	61877	60990	63101	65437
2014-10-02 17:59:22.490	61889	60988	63108	65446
2014-10-02 17:59:22.494	61901	61000	63117	65467
2014-10-02 17:59:22.500	61877	60991	63099	65449
2014-10-02 17:59:22.505	61871	61009	63087	65433
2014-10-02 17:59:22.509	61877	61023	63069	65427
2014-10-02 17:59:22.515	61865	61005	63073	65433
2014-10-02 17:59:22.519	61880	61015	63097	65431
2014-10-02 17:59:22.525	61889	61011	63099	65408
2014-10-02 17:59:22.529	61886	60997	63106	65401
2014-10-02 17:59:22.535	61877	61016	63105	65389
2014-10-02 17:59:22.539	61871	61028	63096	65372
2014-10-02 17:59:22.545	61888	61024	63109	65366
2014-10-02 17:59:22.549	61891	61019	63122	65364
2014-10-02 17:59:22.555	61888	61018	63101	65366
2014-10-02 17:59:22.559	61890	61014	63077	65372
2014-10-02 17:59:22.565	61892	61007	63081	65394
2014-10-02 17:59:22.569	61891	60999	63096	65434
2014-10-02 17:59:22.575	61894	60991	63107	65474
2014-10-02 17:59:22.579	61893	61009	63092	65479
2014-10-02 17:59:22.585	61880	61014	63085	65482
2014-10-02 17:59:22.589	61887	61014	63097	65479
2014-10-02 17:59:22.595	61888	61022	63077	65450
2014-10-02 17:59:22.599	61883	61022	63064	65457
2014-10-02 17:59:22.605	61886	61021	63083	65467
2014-10-02 17:59:22.609	61890	60993	63094	65457
2014-10-02 17:59:22.615	61890	60993	63101	65439
2014-10-02 17:59:22.619	61888	61018	63118	65403
2014-10-02 17:59:22.625	61875	61011	63119	65387
2014-10-02 17:59:22.630	61877	61018	63098	65392
2014-10-02 17:59:22.634	61893	61025	63097	65387
2014-10-02 17:59:22.640	61884	61032	63106	65391
2014-10-02 17:59:22.644	61879	61024	63096	65409
2014-10-02 17:59:22.650	61889	61008	63095	65423
2014-10-02 17:59:22.654	61900	61010	63110	65416
2014-10-02 17:59:22.660	61891	60994	63125	65405
2014-10-02 17:59:22.664	61891	60992	63129	65398
2014-10-02 17:59:22.670	61907	61006	63105	65379
2014-10-02 17:59:22.674	61900	61018	63089	65389
2014-10-02 17:59:22.680	61879	61026	63096	65422
2014-10-02 17:59:22.684	61867	61007	63102	65425
2014-10-02 17:59:22.690	61897	61011	63111	65424
2014-10-02 17:59:22.694	61912	61023	63131	65425
2014-10-02 17:59:22.700	61893	60997	63141	65419
2014-10-02 17:59:22.704	61893	60994	63114	65404
2014-10-02 17:59:22.710	61891	61017	63094	65402
2014-10-02 17:59:22.714	61896	61023	63106	65442
2014-10-02 17:59:22.720	61889	61019	63111	65469
2014-10-02 17:59:22.724	61890	61019	63120	65483
2014-10-02 17:59:22.730	61903	61033	63117	65500
2014-10-02 17:59:22.734	61896	61034	63109	65501
2014-10-02 17:59:22.740	61907	61026	63114	65486
2014-10-02 17:59:22.744	61909	61023	63113	65472
2014-10-02 17:59:22.750	61911	61015	63118	65461
2014-10-02 17:59:22.755	61907	61022	63128	65436
2014-10-02 17:59:22.759	61896	61028	63119	65418
2014-10-02 17:59:22.765	61910	61032	63120	65412
2014-10-02 17:59:22.769	61903	61037	63122	65386
2014-10-02 17:59:22.775	61899	61024	63104	65377
2014-10-02 17:59:22.779	61889	61028	63088	65379
2014-10-02 17:59:22.785	61888	61022	63096	65369
2014-10-02 17:59:22.789	61912	61006	63105	65378
2014-10-02 17:59:22.795	61902	61019	63103	65392
2014-10-02 17:59:22.799	61901	61023	63112	65398
2014-10-02 17:59:22.805	61912	61020	63117	65431
2014-10-02 17:59:22.809	61903	61027	63109	65476
2014-10-02 17:59:22.815	61914	61034	63090	65494
2014-10-02 17:59:22.819	61912	61038	63080	65502
2014-10-02 17:59:22.825	61903	61029	63095	65490
2014-10-02 17:59:22.829	61913	61018	63115	65462
2014-10-02 17:59:22.835	61897	61022	63133	65452
2014-10-02 17:59:22.839	61895	61026	63125	65455
2014-10-02 17:59:22.845	61907	61030	63115	65461
2014-10-02 17:59:22.849	61892	61023	63126	65450
2014-10-02 17:59:22.855	61901	61023	63140	65419
2014-10-02 17:59:22.859	61917	61033	63155	65391
2014-10-02 17:59:22.865	61910	61013	63154	65377
2014-10-02 17:59:22.869	61900	61014	63161	65399
2014-10-02 17:59:22.875	61914	61022	63176	65425
2014-10-02 17:59:22.880	61931	61013	63177	65431
2014-10-02 17:59:22.884	61910	61030	63169	65441
2014-10-02 17:59:22.890	61899	61023	63148	65450
2014-10-02 17:59:22.894	61920	61030	63134	65451
2014-10-02 17:59:22.900	61937	61043	63133	65456
2014-10-02 17:59:22.904	61934	61028	63140	65461
2014-10-02 17:59:22.910	61918	61044	63139	65452
2014-10-02 17:59:22.914	61920	61034	63132	65470
2014-10-02 17:59:22.920	61927	61035	63135	65471
2014-10-02 17:59:22.924	61924	61049	63131	65447
2014-10-02 17:59:22.930	61920	61042	63123	65449
2014-10-02 17:59:22.934	61915	61046	63114	65423
2014-10-02 17:59:22.940	61917	61036	63098	65420
2014-10-02 17:59:22.944	61920	61050	63096	65452
2014-10-02 17:59:22.950	61917	61047	63097	65460
2014-10-02 17:59:22.954	61916	61035	63082	65456
2014-10-02 17:59:22.960	61929	61050	63092	65442
2014-10-02 17:59:22.964	61931	61016	63137	65446
2014-10-02 17:59:22.970	61928	61023	63140	65441
2014-10-02 17:59:22.974	61940	61043	63138	65436
2014-10-02 17:59:22.980	61937	61027	63165	65462
2014-10-02 17:59:22.984	61934	61046	63159	65480
2014-10-02 17:59:22.990	61946	61038	63142	65493
2014-10-02 17:59:22.994	61933	61047	63139	65493
2014-10-02 17:59:23.000	61927	61068	63138	65485
2014-10-02 17:59:23.005	61944	61043	63140	65469
2014-10-02 17:59:23.009	61938	61039	63139	65460
2014-10-02 17:59:23.015	61936	61035	63134	65453
2014-10-02 17:59:23.019	61947	61039	63137	65417
2014-10-02 17:59:23.025	61946	61056	63144	65418
2014-10-02 17:59:23.029	61937	61053	63151	65448
2014-10-02 17:59:23.035	61932	61053	63157	65462
2014-10-02 17:59:23.039	61924	61045	63170	65484
2014-10-02 17:59:23.045	61921	61037	63179	65474
2014-10-02 17:59:23.049	61945	61037	63182	65473
2014-10-02 17:59:23.055	61948	61040	63191	65501
2014-10-02 17:59:23.059	61938	61044	63189	65463
2014-10-02 17:59:23.065	61947	61041	63173	65437
2014-10-02 17:59:23.069	61936	61050	63168	65459
2014-10-02 17:59:23.075	61940	61056	63169	65474
2014-10-02 17:59:23.079	61954	61047	63176	65473
2014-10-02 17:59:23.085	61942	61058	63175	65463
2014-10-02 17:59:23.089	61942	61049	63163	65493
2014-10-02 17:59:23.095	61950	61031	63158	65487
2014-10-02 17:59:23.099	61952	61053	63149	65467
2014-10-02 17:59:23.105	61956	61066	63152	65492
2014-10-02 17:59:23.109	61942	61061	63150	65490
2014-10-02 17:59:23.115	61936	61056	63111	65473
2014-10-02 17:59:23.119	61959	61064	63113	65464
2014-10-02 17:59:23.125	61946	61069	63155	65454
2014-10-02 17:59:23.130	61937	61054	63170	65462
2014-10-02 17:59:23.134	61957	61047	63172	65472
2014-10-02 17:59:23.140	61950	61036	63164	65464
2014-10-02 17:59:23.144	61950	61037	63156	65459
2014-10-02 17:59:23.150	61962	61064	63153	65472
2014-10-02 17:59:23.154	61962	61056	63163	65481
2014-10-02 17:59:23.160	61954	61060	63178	65454
2014-10-02 17:59:23.164	61951	61084	63163	65432
2014-10-02 17:59:23.170	61961	61071	63155	65439
2014-10-02 17:59:23.174	61962	61053	63162	65460
2014-10-02 17:59:23.180	61959	61059	63159	65507
2014-10-02 17:59:23.184	61959	61065	63184	65534
2014-10-02 17:59:23.190	61961	61053	63195	65527
2014-10-02 17:59:23.194	61954	61067	63179	65531
2014-10-02 17:59:23.200	61953	61082	63193	65532
2014-10-02 17:59:23.204	61963	61075	63194	65534
2014-10-02 17:59:23.210	61963	61080	63165	65533
2014-10-02 17:59:23.214	61955	61067	63166	65521
2014-10-02 17:59:23.220	61966	61066	63189	65499
2014-10-02 17:59:23.224	61984	61073	63178	65485
2014-10-02 17:59:23.230	61966	61068	63180	65469
2014-10-02 17:59:23.234	61963	61083	63203	65429
2014-10-02 17:59:23.240	61984	61083	63191	65399
2014-10-02 17:59:23.244	61975	61073	63181	65380
2014-10-02 17:59:23.250	61964	61078	63182	65377
2014-10-02 17:59:23.255	61977	61077	63162	65398
2014-10-02 17:59:23.259	61983	61062	63153	65441
2014-10-02 17:59:23.265	61963	61055	63168	65487
2014-10-02 17:59:23.269	61965	61063	63172	65525
2014-10-02 17:59:23.275	61984	61072	63185	65579
2014-10-02 17:59:23.279	61986	61081	63205	65601
2014-10-02 17:59:23.285	61978	61073	63214	65605
2014-10-02 17:59:23.289	61969	61071	63217	65610
2014-10-02 17:59:23.295	61983	61087	63207	65578
2014-10-02 17:59:23.299	61991	61073	63200	65513
2014-10-02 17:59:23.305	61973	61076	63216	65470
2014-10-02 17:59:23.309	61975	61083	63206	65491
2014-10-02 17:59:23.315	61985	61058	63196	65506
2014-10-02 17:59:23.319	61979	61077	63204	65491
2014-10-02 17:59:23.325	61977	61089	63168	65490
2014-10-02 17:59:23.329	61983	61087	63157	65506
2014-10-02 17:59:23.335	61977	61097	63181	65499
2014-10-02 17:59:23.339	61980	61098	63166	65452
2014-10-02 17:59:23.345	61982	61091	63182	65442
2014-10-02 17:59:23.349	61986	61070	63202	65459
2014-10-02 17:59:23.355	61988	61079	63201	65465
2014-10-02 17:59:23.359	61980	61087	63225	65486
2014-10-02 17:59:23.365	61992	61078	63233	65517
2014-10-02 17:59:23.369	61977	61078	63230	65564
2014-10-02 17:59:23.375	61974	61096	63217	65567
2014-10-02 17:59:23.380	61993	61107	63203	65551
2014-10-02 17:59:23.384	61981	61076	63202	65550
2014-10-02 17:59:23.390	61985	61075	63209	65506
2014-10-02 17:59:23.394	61982	61096	63222	65492
2014-10-02 17:59:23.400	61984	61081	63210	65534
2014-10-02 17:59:23.404	62001	61088	63204	65559
2014-10-02 17:59:23.410	61997	61108	63196	65559
2014-10-02 17:59:23.414	61999	61097	63173	65541
2014-10-02 17:59:23.420	61994	61108	63192	65518
2014-10-02 17:59:23.424	61994	61108	63201	65500
2014-10-02 17:59:23.430	61994	61088	63217	65497
2014-10-02 17:59:23.434	61991	61095	63238	65507
2014-10-02 17:59:23.440	62013	61095	63230	65518
2014-10-02 17:59:23.444	62004	61093	63240	65527
2014-10-02 17:59:23.450	61998	61094	63231	65540
2014-10-02 17:59:23.454	62010	61093	63219	65555
2014-10-02 17:59:23.460	62007	61104	63225	65548
2014-10-02 17:59:23.464	62006	61103	63212	65507
2014-10-02 17:59:23.470	61989	61102	63204	65463
2014-10-02 17:59:23.474	62000	61102	63202	65471
2014-10-02 17:59:23.480	62007	61090	63203	65506
2014-10-02 17:59:23.484	61993	61089	63198	65528
2014-10-02 17:59:23.490	62003	61094	63206	65570
2014-10-02 17:59:23.494	62012	61106	63224	65563
2014-10-02 17:59:23.500	62003	61115	63224	65524
2014-10-02 17:59:23.505	61991	61105	63226	65523
2014-10-02 17:59:23.509	62012	61116	63221	65525
2014-10-02 17:59:23.515	62024	61110	63206	65543
2014-10-02 17:59:23.519	62009	61093	63200	65562
2014-10-02 17:59:23.525	62007	61114	63195	65594
2014-10-02 17:59:23.529	62011	61113	63200	65586
2014-10-02 17:59:23.535	62020	61109	63208	65529
2014-10-02 17:59:23.539	62026	61107	63198	65523
2014-10-02 17:59:23.545	62011	61105	63224	65497
2014-10-02 17:59:23.549	62020	61128	63250	65501
2014-10-02 17:59:23.555	62028	61115	63247	65544
2014-10-02 17:59:23.559	62010	61096	63263	65542
2014-10-02 17:59:23.565	62014	61113	63268	65570
2014-10-02 17:59:23.569	62020	61106	63268	65575
2014-10-02 17:59:23.575	62022	61092	63258	65570
2014-10-02 17:59:23.579	62020	61105	63252	65575
2014-10-02 17:59:23.585	62014	61128	63249	65529
2014-10-02 17:59:23.589	62033	61134	63239	65512
2014-10-02 17:59:23.595	62023	61104	63243	65499
2014-10-02 17:59:23.599	62011	61105	63226	65492
2014-10-02 17:59:23.605	62024	61132	63211	65530
2014-10-02 17:59:23.609	62024	61119	63218	65554
2014-10-02 17:59:23.615	62021	61111	63213	65546
2014-10-02 17:59:23.619	62021	61120	63210	65544
2014-10-02 17:59:23.625	62021	61116	63215	65559
2014-10-02 17:59:23.630	62033	61120	63217	65564
2014-10-02 17:59:23.634	62036	61147	63224	65581
2014-10-02 17:59:23.640	62018	61144	63244	65587
2014-10-02 17:59:23.644	62027	61122	63250	65574
2014-10-02 17:59:23.650	62044	61120	63244	65586
2014-10-02 17:59:23.654	62033	61117	63251	65589
2014-10-02 17:59:23.660	62031	61125	63263	65582
2014-10-02 17:59:23.664	62034	61129	63249	65584
2014-10-02 17:59:23.670	62030	61118	63241	65568
2014-10-02 17:59:23.674	62020	61134	63254	65538
2014-10-02 17:59:23.680	62020	61139	63243	65514
2014-10-02 17:59:23.684	62024	61118	63236	65510
2014-10-02 17:59:23.690	62031	61131	63234	65512
2014-10-02 17:59:23.694	62036	61140	63220	65515
2014-10-02 17:59:23.700	62025	61127	63216	65544
2014-10-02 17:59:23.704	62039	61127	63223	65544
2014-10-02 17:59:23.710	62043	61132	63244	65521
2014-10-02 17:59:23.714	62030	61134	63264	65545
2014-10-02 17:59:23.720	62033	61121	63259	65556
2014-10-02 17:59:23.724	62041	61126	63238	65561
2014-10-02 17:59:23.730	62033	61146	63233	65599
2014-10-02 17:59:23.734	62032	61146	63250	65606
2014-10-02 17:59:23.740	62045	61136	63267	65608
2014-10-02 17:59:23.744	62026	61126	63291	65625
2014-10-02 17:59:23.750	62025	61145	63284	65620
2014-10-02 17:59:23.755	62044	61155	63244	65611
2014-10-02 17:59:23.759	62033	61151	63241	65621
2014-10-02 17:59:23.765	62029	61149	63246	65619
2014-10-02 17:59:23.769	62041	61156	63247	65585
2014-10-02 17:59:23.775	62043	61163	63247	65563
2014-10-02 17:59:23.779	62033	61143	63238	65536
2014-10-02 17:59:23.785	62035	61147	63243	65468
2014-10-02 17:59:23.789	62046	61149	63248	65442
2014-10-02 17:59:23.795	62039	61136	63241	65463
2014-10-02 17:59:23.799	62045	61141	63244	65472
2014-10-02 17:59:23.805	62058	61145	63255	65526
2014-10-02 17:59:23.809	62050	61152	63248	65596
2014-10-02 17:59:23.815	62038	61139	63233	65597
2014-10-02 17:59:23.819	62027	61135	63248	65604
2014-10-02 17:59:23.825	62041	61147	63262	65628
2014-10-02 17:59:23.829	62054	61142	63249	65632
2014-10-02 17:59:23.835	62044	61146	63255	65649
2014-10-02 17:59:23.839	62055	61153	63275	65666
2014-10-02 17:59:23.845	62045	61153	63268	65667
2014-10-02 17:59:23.849	62043	61152	63258	65644
2014-10-02 17:59:23.855	62048	61155	63257	65585
2014-10-02 17:59:23.859	62041	61164	63261	65534
2014-10-02 17:59:23.865	62061	61155	63265	65495
2014-10-02 17:59:23.869	62047	61141	63261	65481
2014-10-02 17:59:23.875	62045	61148	63269	65482
2014-10-02 17:59:23.880	62059	61147	63275	65494
2014-10-02 17:59:23.884	62040	61148	63274	65535
2014-10-02 17:59:23.890	62042	61165	63273	65551
2014-10-02 17:59:23.894	62053	61162	63253	65570
2014-10-02 17:59:23.900	62050	61148	63245	65604
2014-10-02 17:59:23.904	62045	61151	63236	65633
2014-10-02 17:59:23.910	62036	61165	63232	65649
2014-10-02 17:59:23.914	62044	61152	63241	65639
2014-10-02 17:59:23.920	62057	61140	63231	65630
2014-10-02 17:59:23.924	62047	61158	63242	65605
2014-10-02 17:59:23.930	62052	61153	63261	65573
2014-10-02 17:59:23.934	62063	61153	63259	65561
2014-10-02 17:59:23.940	62049	61163	63274	65551
2014-10-02 17:59:23.944	62053	61173	63268	65555
2014-10-02 17:59:23.950	62062	61185	63263	65588
2014-10-02 17:59:23.954	62054	61157	63286	65621
2014-10-02 17:59:23.960	62054	61154	63281	65614
2014-10-02 17:59:23.964	62050	61177	63288	65591
2014-10-02 17:59:23.970	62055	61159	63285	65574
2014-10-02 17:59:23.974	62060	61155	63259	65551
2014-10-02 17:59:23.980	62058	61178	63269	65545
2014-10-02 17:59:23.984	62051	61170	63261	65542
2014-10-02 17:59:23.990	62055	61159	63246	65530
2014-10-02 17:59:23.994	62062	61168	63231	65544
2014-10-02 17:59:24.000	62055	61165	63225	65553
2014-10-02 17:59:24.005	62058	61155	63246	65562
2014-10-02 17:59:24.009	62048	61152	63249	65587
2014-10-02 17:59:24.015	62042	61175	63255	65602
2014-10-02 17:59:24.019	62066	61177	63272	65639
2014-10-02 17:59:24.025	62058	61154	63283	65680
2014-10-02 17:59:24.029	62042	61180	63270	65685
2014-10-02 17:59:24.035	62054	61179	63258	65684
2014-10-02 17:59:24.039	62055	61152	63278	65661
2014-10-02 17:59:24.045	62053	61172	63282	65620
2014-10-02 17:59:24.049	62051	61172	63266	65589
2014-10-02 17:59:24.055	62046	61169	63247	65556
2014-10-02 17:59:24.059	62060	61176	63234	65532
2014-10-02 17:59:24.065	62068	61160	63223	65533
2014-10-02 17:59:24.069	62056	61182	63241	65556
2014-10-02 17:59:24.075	62046	61184	63271	65568
2014-10-02 17:59:24.079	62059	61157	63256	65546
2014-10-02 17:59:24.085	62064	61170	63259	65522
2014-10-02 17:59:24.089	62057	61168	63278	65501
2014-10-02 17:59:24.095	62073	61164	63263	65503
2014-10-02 17:59:24.099	62071	61164	63269	65556
2014-10-02 17:59:24.105	62062	61164	63271	65605
2014-10-02 17:59:24.109	62071	61170	63255	65659
2014-10-02 17:59:24.115	62065	61169	63250	65700
2014-10-02 17:59:24.119	62061	61183	63251	65683
2014-10-02 17:59:24.125	62064	61172	63271	65633
2014-10-02 17:59:24.130	62064	61162	63256	65573
2014-10-02 17:59:24.134	62063	61178	63231	65572
2014-10-02 17:59:24.140	62063	61161	63241	65606
2014-10-02 17:59:24.144	62056	61177	63251	65619
2014-10-02 17:59:24.150	62062	61205	63269	65644
2014-10-02 17:59:24.154	62074	61181	63271	65626
2014-10-02 17:59:24.160	62060	61185	63266	65596
2014-10-02 17:59:24.164	62067	61185	63273	65580
2014-10-02 17:59:24.170	62068	61172	63268	65555
2014-10-02 17:59:24.174	62041	61181	63273	65551
2014-10-02 17:59:24.180	62063	61170	63279	65555
2014-10-02 17:59:24.184	62073	61168	63280	65561
2014-10-02 17:59:24.190	62056	61181	63281	65556
2014-10-02 17:59:24.194	62060	61188	63280	65562
2014-10-02 17:59:24.200	62062	61187	63283	65585
2014-10-02 17:59:24.204	62064	61184	63270	65593
2014-10-02 17:59:24.210	62070	61182	63260	65612
2014-10-02 17:59:24.214	62059	61169	63262	65648
2014-10-02 17:59:24.220	62061	61169	63253	65663
2014-10-02 17:59:24.224	62078	61168	63239	65654
2014-10-02 17:59:24.230	62060	61169	63248	65664
2014-10-02 17:59:24.234	62055	61177	63270	65644
2014-10-02 17:59:24.240	62075	61178	63274	65592
2014-10-02 17:59:24.244	62068	61183	63285	65593
2014-10-02 17:59:24.250	62045	61180	63299	65590
2014-10-02 17:59:24.255	62042	61191	63268	65563
2014-10-02 17:59:24.259	62061	61180	63242	65559
2014-10-02 17:59:24.265	62075	61165	63244	65552
2014-10-02 17:59:24.269	62056	61195	63237	65557
2014-10-02 17:59:24.275	62043	61183	63228	65567
2014-10-02 17:59:24.279	62071	61177	63222	65581
2014-10-02 17:59:24.285	62079	61197	63229	65606
2014-10-02 17:59:24.289	62054	61186	63229	65589
2014-10-02 17:59:24.295	62062	61178	63232	65591
2014-10-02 17:59:24.299	62066	61174	63238	65625
2014-10-02 17:59:24.305	62064	61175	63237	65631
2014-10-02 17:59:24.309	62064	61178	63248	65653
2014-10-02 17:59:24.315	62060	61178	63249	65665
2014-10-02 17:59:24.319	62072	61179	63265	65654
2014-10-02 17:59:24.325	62061	61175	63277	65633
2014-10-02 17:59:24.329	62054	61192	63261	65582
2014-10-02 17:59:24.335	62059	61198	63265	65555
2014-10-02 17:59:24.339	62053	61180	63275	65536
2014-10-02 17:59:24.345	62053	61184	63287	65520
2014-10-02 17:59:24.349	62056	61179	63280	65560
2014-10-02 17:59:24.355	62063	61180	63261	65590
2014-10-02 17:59:24.359	62059	61194	63268	65616
2014-10-02 17:59:24.365	62057	61183	63249	65618
2014-10-02 17:59:24.369	62076	61195	63234	65581
2014-10-02 17:59:24.375	62068	61199	63240	65582
2014-10-02 17:59:24.380	62050	61184	63230	65585
2014-10-02 17:59:24.384	62054	61180	63241	65604
2014-10-02 17:59:24.390	62058	61160	63241	65618
2014-10-02 17:59:24.394	62055	61176	63229	65605
2014-10-02 17:59:24.400	62065	61198	63235	65628
2014-10-02 17:59:24.404	62067	61185	63251	65645
2014-10-02 17:59:24.410	62048	61198	63276	65655
2014-10-02 17:59:24.414	62054	61200	63281	65655
2014-10-02 17:59:24.420	62062	61186	63274	65631
2014-10-02 17:59:24.424	62054	61187	63269	65608
2014-10-02 17:59:24.430	62052	61185	63261	65574
2014-10-02 17:59:24.434	62054	61185	63264	65560
2014-10-02 17:59:24.440	62066	61174	63269	65562
2014-10-02 17:59:24.444	62063	61182	63266	65575
2014-10-02 17:59:24.450	62059	61199	63258	65602
2014-10-02 17:59:24.454	62056	61191	63244	65620
2014-10-02 17:59:24.460	62049	61194	63244	65618
2014-10-02 17:59:24.464	62056	61202	63251	65571
2014-10-02 17:59:24.470	62055	61199	63234	65536
2014-10-02 17:59:24.474	62051	61182	63219	65527
2014-10-02 17:59:24.480	62053	61160	63231	65528
2014-10-02 17:59:24.484	62068	61166	63225	65568
2014-10-02 17:59:24.490	62056	61177	63220	65612
2014-10-02 17:59:24.494	62044	61174	63235	65650
2014-10-02 17:59:24.500	62067	61169	63224	65684
2014-10-02 17:59:24.505	62057	61180	63222	65676
2014-10-02 17:59:24.509	62051	61190	63235	65647
2014-10-02 17:59:24.515	62063	61176	63229	65622
2014-10-02 17:59:24.519	62050	61183	63231	65606
2014-10-02 17:59:24.525	62049	61200	63249	65600
2014-10-02 17:59:24.529	62062	61185	63264	65611
2014-10-02 17:59:24.535	62054	61202	63273	65620
2014-10-02 17:59:24.539	62048	61206	63274	65609
2014-10-02 17:59:24.545	62053	61185	63270	65603
2014-10-02 17:59:24.549	62051	61199	63276	65569
2014-10-02 17:59:24.555	62049	61190	63270	65514
2014-10-02 17:59:24.559	62052	61186	63252	65509
2014-10-02 17:59:24.565	62057	61186	63255	65526
2014-10-02 17:59:24.569	62055	61177	63258	65529
2014-10-02 17:59:24.575	62052	61186	63241	65530
2014-10-02 17:59:24.579	62061	61185	63234	65552
2014-10-02 17:59:24.585	62055	61186	63238	65577
2014-10-02 17:59:24.589	62052	61184	63246	65595
2014-10-02 17:59:24.595	62052	61184	63255	65632
2014-10-02 17:59:24.599	62049	61192	63237	65644
2014-10-02 17:59:24.605	62053	61188	63222	65630
2014-10-02 17:59:24.609	62046	61173	63229	65639
2014-10-02 17:59:24.615	62045	61173	63233	65646
2014-10-02 17:59:24.619	62046	61180	63234	65654
2014-10-02 17:59:24.625	62041	61187	63225	65651
2014-10-02 17:59:24.630	62046	61199	63220	65638
2014-10-02 17:59:24.634	62055	61198	63207	65615
2014-10-02 17:59:24.640	62057	61196	63201	65578
2014-10-02 17:59:24.644	62052	61196	63221	65542
2014-10-02 17:59:24.650	62044	61189	63236	65511
2014-10-02 17:59:24.654	62036	61188	63230	65511
2014-10-02 17:59:24.660	62042	61185	63210	65526
2014-10-02 17:59:24.664	62053	61176	63222	65553
2014-10-02 17:59:24.670	62047	61170	63240	65582
2014-10-02 17:59:24.674	62046	61176	63228	65581
2014-10-02 17:59:24.680	62040	61177	63221	65572
2014-10-02 17:59:24.684	62044	61166	63215	65570
2014-10-02 17:59:24.690	62057	61167	63232	65583
2014-10-02 17:59:24.694	62041	61165	63250	65588
2014-10-02 17:59:24.700	62041	61158	63234	65566
2014-10-02 17:59:24.704	62043	61156	63224	65567
2014-10-02 17:59:24.710	62044	61172	63214	65581
2014-10-02 17:59:24.714	62051	61194	63215	65558
2014-10-02 17:59:24.720	62046	61190	63216	65574
2014-10-02 17:59:24.724	62050	61187	63206	65605
2014-10-02 17:59:24.730	62038	61187	63210	65620
2014-10-02 17:59:24.734	62036	61174	63215	65660
2014-10-02 17:59:24.740	62044	61180	63227	65650
2014-10-02 17:59:24.744	62033	61193	63224	65635
2014-10-02 17:59:24.750	62051	61170	63215	65622
2014-10-02 17:59:24.755	62061	61170	63216	65594
2014-10-02 17:59:24.759	62042	61194	63216	65592
2014-10-02 17:59:24.765	62021	61177	63241	65572
2014-10-02 17:59:24.769	62022	61177	63236	65556
2014-10-02 17:59:24.775	62041	61197	63217	65530
2014-10-02 17:59:24.779	62043	61183	63235	65509
2014-10-02 17:59:24.785	62029	61167	63229	65526
2014-10-02 17:59:24.789	62030	61178	63235	65547
2014-10-02 17:59:24.795	62045	61169	63237	65581
2014-10-02 17:59:24.799	62040	61165	63214	65596
2014-10-02 17:59:24.805	62037	61192	63216	65576
2014-10-02 17:59:24.809	62037	61194	63201	65549
2014-10-02 17:59:24.815	62033	61188	63202	65546
2014-10-02 17:59:24.819	62040	61184	63228	65545
2014-10-02 17:59:24.825	62035	61177	63221	65538
2014-10-02 17:59:24.829	62045	61177	63216	65552
2014-10-02 17:59:24.835	62044	61170	63211	65583
2014-10-02 17:59:24.839	62029	61162	63204	65625
2014-10-02 17:59:24.845	62035	61166	63214	65624
2014-10-02 17:59:24.849	62034	61179	63215	65610
2014-10-02 17:59:24.855	62029	61175	63200	65625
2014-10-02 17:59:24.859	62023	61169	63186	65593
2014-10-02 17:59:24.865	62022	61173	63196	65593
2014-10-02 17:59:24.869	62021	61168	63217	65629
2014-10-02 17:59:24.875	62023	61165	63212	65597
2014-10-02 17:59:24.880	62045	61166	63208	65570
2014-10-02 17:59:24.884	62047	61168	63223	65552
2014-10-02 17:59:24.890	62030	61174	63220	65535
2014-10-02 17:59:24.894	62031	61181	63203	65547
2014-10-02 17:59:24.900	62017	61168	63195	65551
2014-10-02 17:59:24.904	62004	61163	63202	65543
2014-10-02 17:59:24.910	62022	61172	63206	65520
2014-10-02 17:59:24.914	62035	61161	63221	65516
2014-10-02 17:59:24.920	62032	61161	63236	65527
2014-10-02 17:59:24.924	62026	61164	63219	65555
2014-10-02 17:59:24.930	62017	61163	63207	65589
2014-10-02 17:59:24.934	62012	61179	63209	65575
2014-10-02 17:59:24.940	62023	61186	63216	65585
2014-10-02 17:59:24.944	62009	61177	63220	65586
2014-10-02 17:59:24.950	62008	61173	63212	65560
2014-10-02 17:59:24.954	62036	61162	63210	65567
2014-10-02 17:59:24.960	62017	61149	63219	65566
2014-10-02 17:59:24.964	62007	61164	63227	65576
2014-10-02 17:59:24.970	62033	61171	63217	65584
2014-10-02 17:59:24.974	62030	61157	63208	65580
2014-10-02 17:59:24.980	62019	61176	63199	65605
2014-10-02 17:59:24.984	62034	61186	63184	65598
2014-10-02 17:59:24.990	62030	61155	63176	65565
2014-10-02 17:59:24.994	62008	61159	63169	65561
2014-10-02 17:59:25.000	62013	61163	63176	65547
2014-10-02 17:59:25.005	62014	61147	63182	65539
2014-10-02 17:59:25.009	62020	61158	63169	65550
2014-10-02 17:59:25.015	62013	61165	63184	65551
2014-10-02 17:59:25.019	62006	61159	63203	65559
2014-10-02 17:59:25.025	62035	61161	63200	65565
2014-10-02 17:59:25.029	62029	61163	63218	65568
2014-10-02 17:59:25.035	62011	61162	63232	65567
2014-10-02 17:59:25.039	62008	61166	63239	65541
2014-10-02 17:59:25.045	62011	61156	63236	65518
2014-10-02 17:59:25.049	62028	61142	63210	65513
2014-10-02 17:59:25.055	62024	61155	63201	65530
2014-10-02 17:59:25.059	62027	61160	63197	65551
2014-10-02 17:59:25.065	62030	61147	63188	65567
2014-10-02 17:59:25.069	62030	61160	63186	65578
2014-10-02 17:59:25.075	62035	61170	63188	65562
2014-10-02 17:59:25.079	62018	61150	63183	65561
2014-10-02 17:59:25.085	62024	61145	63160	65592
2014-10-02 17:59:25.089	62031	61153	63162	65598
2014-10-02 17:59:25.095	62019	61146	63182	65582
2014-10-02 17:59:25.099	62018	61156	63191	65577
2014-10-02 17:59:25.105	62014	61159	63188	65575
2014-10-02 17:59:25.109	62010	61158	63189	65558
2014-10-02 17:59:25.115	62006	61160	63204	65544
2014-10-02 17:59:25.119	62003	61146	63202	65527
2014-10-02 17:59:25.125	62007	61145	63199	65500
2014-10-02 17:59:25.130	62007	61137	63207	65504
2014-10-02 17:59:25.134	62000	61138	63199	65550
2014-10-02 17:59:25.140	62005	61150	63188	65569
2014-10-02 17:59:25.144	62024	61137	63186	65550
2014-10-02 17:59:25.150	62025	61148	63172	65546
2014-10-02 17:59:25.154	62010	61152	63157	65544
2014-10-02 17:59:25.160	62007	61138	63157	65540
2014-10-02 17:59:25.164	62016	61145	63167	65537
2014-10-02 17:59:25.170	62007	61147	63179	65538
2014-10-02 17:59:25.174	61999	61131	63186	65546
2014-10-02 17:59:25.180	62010	61132	63177	65524
2014-10-02 17:59:25.184	62015	61160	63176	65541
2014-10-02 17:59:25.190	62009	61162	63194	65580
2014-10-02 17:59:25.194	62003	61152	63183	65587
2014-10-02 17:59:25.200	61993	61157	63190	65602
2014-10-02 17:59:25.204	61999	61152	63214	65585
2014-10-02 17:59:25.210	62008	61142	63202	65592
2014-10-02 17:59:25.214	61999	61139	63193	65591
2014-10-02 17:59:25.220	62010	61142	63180	65561
2014-10-02 17:59:25.224	62016	61136	63164	65566
2014-10-02 17:59:25.230	62012	61139	63179	65542
2014-10-02 17:59:25.234	62006	61142	63185	65541
2014-10-02 17:59:25.240	62012	61142	63189	65570
2014-10-02 17:59:25.244	62028	61147	63213	65566
2014-10-02 17:59:25.250	62002	61132	63212	65530
2014-10-02 17:59:25.255	61984	61125	63194	65480
2014-10-02 17:59:25.259	62001	61132	63177	65489
2014-10-02 17:59:25.265	62014	61132	63154	65489
2014-10-02 17:59:25.269	62002	61128	63157	65465
2014-10-02 17:59:25.275	61995	61132	63156	65496
2014-10-02 17:59:25.279	62007	61135	63150	65551
2014-10-02 17:59:25.285	62007	61135	63165	65619
2014-10-02 17:59:25.289	61994	61134	63165	65638
2014-10-02 17:59:25.295	62005	61134	63159	65603
2014-10-02 17:59:25.299	62011	61137	63158	65563
2014-10-02 17:59:25.305	61984	61127	63166	65516
2014-10-02 17:59:25.309	61991	61127	63171	65488
2014-10-02 17:59:25.315	62012	61135	63162	65483
2014-10-02 17:59:25.319	62005	61144	63162	65516
2014-10-02 17:59:25.325	62005	61146	63166	65563
2014-10-02 17:59:25.329	61992	61132	63165	65594
2014-10-02 17:59:25.335	61994	61123	63168	65619
2014-10-02 17:59:25.339	62007	61140	63178	65601
2014-10-02 17:59:25.345	61990	61130	63181	65562
2014-10-02 17:59:25.349	61988	61108	63185	65546
2014-10-02 17:59:25.355	61992	61125	63189	65510
2014-10-02 17:59:25.359	61995	61125	63176	65488
2014-10-02 17:59:25.365	62005	61128	63168	65505
2014-10-02 17:59:25.369	61993	61139	63182	65481
2014-10-02 17:59:25.375	61983	61131	63179	65489
2014-10-02 17:59:25.380	61989	61128	63153	65512
2014-10-02 17:59:25.384	61992	61132	63143	65515
2014-10-02 17:59:25.390	61983	61136	63148	65531
2014-10-02 17:59:25.394	61981	61125	63142	65503
2014-10-02 17:59:25.400	61990	61122	63138	65477
2014-10-02 17:59:25.404	61998	61134	63144	65466
2014-10-02 17:59:25.410	61999	61128	63136	65502
2014-10-02 17:59:25.414	61984	61122	63119	65570
2014-10-02 17:59:25.420	61981	61125	63113	65589
2014-10-02 17:59:25.424	61982	61129	63119	65620
2014-10-02 17:59:25.430	61990	61127	63126	65604
2014-10-02 17:59:25.434	62000	61113	63127	65555
2014-10-02 17:59:25.440	61985	61100	63132	65542
2014-10-02 17:59:25.444	61992	61117	63135	65526
2014-10-02 17:59:25.450	61993	61136	63141	65529
2014-10-02 17:59:25.454	61975	61122	63160	65538
2014-10-02 17:59:25.460	61985	61119	63174	65549
2014-10-02 17:59:25.464	61981	61132	63181	65543
2014-10-02 17:59:25.470	61979	61118	63186	65520
2014-10-02 17:59:25.474	61994	61102	63174	65497
2014-10-02 17:59:25.480	61981	61118	63157	65466
2014-10-02 17:59:25.484	61980	61110	63169	65465
2014-10-02 17:59:25.490	61998	61108	63170	65464
2014-10-02 17:59:25.494	61984	61127	63166	65474
2014-10-02 17:59:25.500	61979	61109	63184	65512
2014-10-02 17:59:25.505	61974	61099	63188	65519
2014-10-02 17:59:25.509	61972	61114	63156	65505
2014-10-02 17:59:25.515	61980	61111	63136	65498
2014-10-02 17:59:25.519	61961	61102	63147	65494
2014-10-02 17:59:25.525	61986	61105	63143	65505
2014-10-02 17:59:25.529	61986	61120	63140	65531
2014-10-02 17:59:25.535	61965	61121	63149	65559
2014-10-02 17:59:25.539	61995	61104	63154	65597
2014-10-02 17:59:25.545	61980	61111	63162	65598
2014-10-02 17:59:25.549	61965	61120	63166	65577
2014-10-02 17:59:25.555	61974	61111	63169	65552
2014-10-02 17:59:25.559	61980	61101	63163	65535
2014-10-02 17:59:25.565	61979	61098	63166	65563
2014-10-02 17:59:25.569	61965	61103	63169	65548
2014-10-02 17:59:25.575	61968	61108	63139	65531
2014-10-02 17:59:25.579	61966	61107	63132	65518
2014-10-02 17:59:25.585	61972	61111	63131	65464
2014-10-02 17:59:25.589	61971	61110	63118	65439
2014-10-02 17:59:25.595	61965	61093	63133	65426
2014-10-02 17:59:25.599	61969	61099	63138	65449
2014-10-02 17:59:25.605	61955	61101	63130	65476
2014-10-02 17:59:25.609	61976	61087	63129	65482
2014-10-02 17:59:25.615	61989	61113	63117	65499
2014-10-02 17:59:25.619	61971	61119	63107	65489
2014-10-02 17:59:25.625	61973	61100	63116	65502
2014-10-02 17:59:25.630	61972	61121	63119	65522
2014-10-02 17:59:25.634	61964	61118	63127	65545
2014-10-02 17:59:25.640	61958	61095	63144	65552
2014-10-02 17:59:25.644	61962	61096	63145	65551
2014-10-02 17:59:25.650	61968	61103	63150	65587
2014-10-02 17:59:25.654	61972	61089	63141	65579
2014-10-02 17:59:25.660	61966	61068	63136	65541
2014-10-02 17:59:25.664	61952	61097	63157	65516
2014-10-02 17:59:25.670	61967	61108	63139	65498
2014-10-02 17:59:25.674	61968	61093	63122	65501
2014-10-02 17:59:25.680	61958	61098	63121	65499
2014-10-02 17:59:25.684	61976	61089	63119	65472
2014-10-02 17:59:25.690	61964	61092	63140	65469
2014-10-02 17:59:25.694	61957	61085	63132	65486
2014-10-02 17:59:25.700	61964	61083	63115	65470
2014-10-02 17:59:25.704	61957	61090	63114	65473
2014-10-02 17:59:25.710	61971	61084	63120	65470
2014-10-02 17:59:25.714	61956	61102	63134	65449
2014-10-02 17:59:25.720	61946	61098	63125	65447
2014-10-02 17:59:25.724	61963	61093	63126	65449
2014-10-02 17:59:25.730	61960	61085	63139	65486
2014-10-02 17:59:25.734	61960	61070	63134	65514
2014-10-02 17:59:25.740	61961	61094	63133	65525
2014-10-02 17:59:25.744	61973	61092	63118	65542
2014-10-02 17:59:25.750	61964	61083	63097	65524
2014-10-02 17:59:25.755	61953	61092	63095	65521
2014-10-02 17:59:25.759	61967	61097	63107	65535
2014-10-02 17:59:25.765	61962	61104	63128	65534
2014-10-02 17:59:25.769	61953	61090	63121	65540
2014-10-02 17:59:25.775	61944	61083	63127	65540
2014-10-02 17:59:25.779	61947	61081	63140	65526
2014-10-02 17:59:25.785	61961	61071	63125	65502
2014-10-02 17:59:25.789	61958	61073	63118	65488
2014-10-02 17:59:25.795	61940	61084	63097	65481
2014-10-02 17:59:25.799	61940	61089	63090	65465
2014-10-02 17:59:25.805	61956	61086	63111	65476
2014-10-02 17:59:25.809	61940	61094	63114	65482
2014-10-02 17:59:25.815	61938	61084	63100	65470
2014-10-02 17:59:25.819	61947	61064	63096	65486
2014-10-02 17:59:25.825	61945	61064	63110	65470
2014-10-02 17:59:25.829	61958	61070	63112	65449
2014-10-02 17:59:25.835	61950	61088	63110	65465
2014-10-02 17:59:25.839	61953	61077	63114	65474
2014-10-02 17:59:25.845	61954	61077	63122	65483
2014-10-02 17:59:25.849	61942	61101	63134	65485
2014-10-02 17:59:25.855	61947	61091	63140	65496
2014-10-02 17:59:25.859	61925	61087	63135	65490
2014-10-02 17:59:25.865	61933	61073	63115	65455
2014-10-02 17:59:25.869	61954	61061	63117	65449
2014-10-02 17:59:25.875	61941	61068	63132	65449
2014-10-02 17:59:25.880	61946	61077	63135	65480
2014-10-02 17:59:25.884	61950	61088	63128	65527
2014-10-02 17:59:25.890	61940	61062	63116	65550
2014-10-02 17:59:25.894	61930	61074	63109	65572
2014-10-02 17:59:25.900	61939	61097	63114	65554
2014-10-02 17:59:25.904	61945	61064	63112	65514
2014-10-02 17:59:25.910	61932	61057	63091	65478
2014-10-02 17:59:25.914	61933	61069	63082	65464
2014-10-02 17:59:25.920	61937	61072	63078	65473
2014-10-02 17:59:25.924	61944	61076	63076	65461
2014-10-02 17:59:25.930	61941	61079	63088	65465
2014-10-02 17:59:25.934	61945	61075	63084	65466
2014-10-02 17:59:25.940	61952	61068	63078	65446
2014-10-02 17:59:25.944	61926	61063	63088	65444
2014-10-02 17:59:25.950	61924	61061	63090	65442
2014-10-02 17:59:25.954	61925	61072	63101	65426
2014-10-02 17:59:25.960	61923	61070	63119	65426
2014-10-02 17:59:25.964	61941	61075	63122	65447
2014-10-02 17:59:25.970	61928	61081	63111	65456
2014-10-02 17:59:25.974	61919	61066	63117	65492
2014-10-02 17:59:25.980	61933	61079	63120	65525
2014-10-02 17:59:25.984	61936	61074	63092	65532
2014-10-02 17:59:25.990	61938	61053	63077	65545
2014-10-02 17:59:25.994	61921	61065	63084	65501
2014-10-02 17:59:26.000	61921	61063	63087	65453
2014-10-02 17:59:26.005	61950	61067	63081	65424
2014-10-02 17:59:26.009	61945	61080	63070	65393
2014-10-02 17:59:26.015	61933	61073	63068	65399
2014-10-02 17:59:26.019	61920	61072	63079	65414
2014-10-02 17:59:26.025	61919	61069	63093	65454
2014-10-02 17:59:26.029	61932	61063	63087	65501
2014-10-02 17:59:26.035	61935	61057	63089	65535
2014-10-02 17:59:26.039	61943	61051	63090	65556
2014-10-02 17:59:26.045	61918	61059	63070	65543
2014-10-02 17:59:26.049	61913	61065	63083	65513
2014-10-02 17:59:26.055	61926	61055	63108	65488
2014-10-02 17:59:26.059	61920	61057	63123	65492
2014-10-02 17:59:26.065	61927	61063	63109	65470
2014-10-02 17:59:26.069	61923	61048	63094	65433
2014-10-02 17:59:26.075	61912	61051	63097	65428
2014-10-02 17:59:26.079	61921	61046	63096	65417
2014-10-02 17:59:26.085	61935	61034	63112	65392
2014-10-02 17:59:26.089	61921	61053	63101	65384
2014-10-02 17:59:26.095	61920	61049	63077	65393
2014-10-02 17:59:26.099	61935	61049	63084	65370
2014-10-02 17:59:26.105	61927	61058	63080	65375
2014-10-02 17:59:26.109	61908	61042	63079	65424
2014-10-02 17:59:26.115	61908	61052	63061	65455
2014-10-02 17:59:26.119	61922	61058	63048	65486
2014-10-02 17:59:26.125	61916	61041	63080	65500
2014-10-02 17:59:26.130	61917	61035	63091	65510
2014-10-02 17:59:26.134	61913	61032	63084	65515
2014-10-02 17:59:26.140	61907	61048	63096	65496
2014-10-02 17:59:26.144	61932	61060	63107	65487
2014-10-02 17:59:26.150	61921	61061	63111	65467
2014-10-02 17:59:26.154	61915	61051	63104	65439
2014-10-02 17:59:26.160	61917	61040	63083	65456
2014-10-02 17:59:26.164	61902	61043	63060	65479
2014-10-02 17:59:26.170	61912	61033	63056	65478
2014-10-02 17:59:26.174	61915	61045	63074	65473
2014-10-02 17:59:26.180	61913	61056	63091	65448
2014-10-02 17:59:26.184	61916	61040	63084	65398
2014-10-02 17:59:26.190	61913	61045	63072	65370
2014-10-02 17:59:26.194	61912	61047	63074	65382
2014-10-02 17:59:26.200	61909	61051	63077	65412
2014-10-02 17:59:26.204	61899	61054	63084	65455
2014-10-02 17:59:26.210	61899	61047	63085	65472
2014-10-02 17:59:26.214	61912	61040	63071	65459
2014-10-02 17:59:26.220	61911	61041	63059	65461
2014-10-02 17:59:26.224	61907	61048	63052	65455
2014-10-02 17:59:26.230	61905	61042	63060	65441
2014-10-02 17:59:26.234	61913	61041	63094	65430
2014-10-02 17:59:26.240	61909	61039	63106	65429
2014-10-02 17:59:26.244	61901	61034	63099	65456
2014-10-02 17:59:26.250	61910	61033	63113	65476
2014-10-02 17:59:26.255	61898	61033	63097	65488
2014-10-02 17:59:26.259	61897	61026	63065	65493
2014-10-02 17:59:26.265	61909	61027	63067	65459
2014-10-02 17:59:26.269	61910	61048	63058	65428
2014-10-02 17:59:26.275	61901	61049	63038	65380
2014-10-02 17:59:26.279	61899	61043	63040	65349
2014-10-02 17:59:26.285	61912	61044	63040	65386
2014-10-02 17:59:26.289	61906	61032	63034	65414
2014-10-02 17:59:26.295	61916	61031	63035	65451
2014-10-02 17:59:26.299	61909	61035	63049	65491
2014-10-02 17:59:26.305	61899	61038	63075	65492
2014-10-02 17:59:26.309	61920	61048	63086	65475
2014-10-02 17:59:26.315	61903	61046	63095	65461
2014-10-02 17:59:26.319	61891	61045	63108	65487
2014-10-02 17:59:26.325	61905	61051	63105	65492
2014-10-02 17:59:26.329	61907	61051	63094	65449
2014-10-02 17:59:26.335	61905	61041	63076	65428
2014-10-02 17:59:26.339	61897	61033	63069	65411
2014-10-02 17:59:26.345	61901	61035	63064	65397
2014-10-02 17:59:26.349	61894	61034	63062	65389
2014-10-02 17:59:26.355	61888	61024	63060	65383
2014-10-02 17:59:26.359	61906	61033	63068	65370
2014-10-02 17:59:26.365	61904	61062	63087	65355
2014-10-02 17:59:26.369	61901	61050	63084	65387
2014-10-02 17:59:26.375	61896	61031	63084	65426
2014-10-02 17:59:26.380	61897	61048	63076	65442
2014-10-02 17:59:26.384	61916	61037	63054	65459
2014-10-02 17:59:26.390	61900	61017	63038	65478
2014-10-02 17:59:26.394	61882	61029	63042	65482
2014-10-02 17:59:26.400	61905	61038	63057	65477
2014-10-02 17:59:26.404	61907	61041	63049	65465
2014-10-02 17:59:26.410	61901	61045	63058	65441
2014-10-02 17:59:26.414	61907	61055	63070	65420
2014-10-02 17:59:26.420	61900	61049	63061	65410
2014-10-02 17:59:26.424	61889	61016	63059	65405
2014-10-02 17:59:26.430	61892	61027	63043	65397
2014-10-02 17:59:26.434	61911	61044	63033	65388
2014-10-02 17:59:26.440	61901	61018	63034	65387
2014-10-02 17:59:26.444	61887	61018	63029	65418
2014-10-02 17:59:26.450	61898	61032	63048	65439
2014-10-02 17:59:26.454	61894	61037	63074	65434
2014-10-02 17:59:26.460	61896	61031	63073	65422
2014-10-02 17:59:26.464	61896	61027	63065	65388
2014-10-02 17:59:26.470	61899	61038	63065	65384
2014-10-02 17:59:26.474	61906	61017	63059	65392
2014-10-02 17:59:26.480	61905	61009	63037	65399
2014-10-02 17:59:26.484	61900	61038	63026	65420
2014-10-02 17:59:26.490	61894	61038	63047	65434
2014-10-02 17:59:26.494	61905	61030	63069	65472
2014-10-02 17:59:26.500	61894	61041	63072	65513
2014-10-02 17:59:26.505	61893	61047	63051	65524
2014-10-02 17:59:26.509	61907	61021	63039	65514
2014-10-02 17:59:26.515	61892	61013	63034	65487
2014-10-02 17:59:26.519	61895	61032	63029	65445
2014-10-02 17:59:26.525	61898	61025	63055	65420
2014-10-02 17:59:26.529	61897	61037	63050	65410
2014-10-02 17:59:26.535	61898	61044	63041	65374
2014-10-02 17:59:26.539	61887	61033	63049	65315
2014-10-02 17:59:26.545	61894	61043	63035	65284
2014-10-02 17:59:26.549	61889	61040	63058	65297
2014-10-02 17:59:26.555	61881	61029	63070	65317
2014-10-02 17:59:26.559	61886	61021	63049	65358
2014-10-02 17:59:26.565	61880	61019	63044	65427
2014-10-02 17:59:26.569	61888	61028	63031	65480
2014-10-02 17:59:26.575	61896	61039	63038	65507
2014-10-02 17:59:26.579	61890	61046	63071	65518
2014-10-02 17:59:26.585	61892	61037	63067	65502
2014-10-02 17:59:26.589	61895	61039	63062	65494
2014-10-02 17:59:26.595	61899	61048	63076	65488
2014-10-02 17:59:26.599	61889	61028	63069	65449
2014-10-02 17:59:26.605	61885	61023	63072	65448
2014-10-02 17:59:26.609	61893	61029	63085	65468
2014-10-02 17:59:26.615	61887	61027	63084	65437
2014-10-02 17:59:26.619	61888	61035	63056	65395
2014-10-02 17:59:26.625	61890	61017	63034	65371
2014-10-02 17:59:26.630	61892	61031	63032	65337
2014-10-02 17:59:26.634	61890	61053	63023	65320
2014-10-02 17:59:26.640	61873	61017	63050	65319
2014-10-02 17:59:26.644	61885	61016	63061	65305
2014-10-02 17:59:26.650	61901	61030	63030	65316
2014-10-02 17:59:26.654	61880	61015	63027	65351
2014-10-02 17:59:26.660	61879	61012	63032	65414
2014-10-02 17:59:26.664	61901	61041	63043	65472
2014-10-02 17:59:26.670	61886	61040	63053	65486
2014-10-02 17:59:26.674	61879	61022	63054	65516
2014-10-02 17:59:26.680	61885	61045	63056	65535
2014-10-02 17:59:26.684	61883	61033	63058	65539
2014-10-02 17:59:26.690	61886	61016	63058	65523
2014-10-02 17:59:26.694	61881	61024	63046	65488
2014-10-02 17:59:26.700	61904	61020	63050	65459
2014-10-02 17:59:26.704	61906	61040	63045	65381
2014-10-02 17:59:26.710	61885	61048	63037	65305
2014-10-02 17:59:26.714	61887	61035	63058	65289
2014-10-02 17:59:26.720	61891	61040	63057	65294
2014-10-02 17:59:26.724	61907	61041	63055	65320
2014-10-02 17:59:26.730	61896	61029	63055	65353
2014-10-02 17:59:26.734	61888	61022	63036	65367
2014-10-02 17:59:26.740	61899	61027	63035	65390
2014-10-02 17:59:26.744	61890	61037	63032	65425
2014-10-02 17:59:26.750	61888	61033	63033	65446
2014-10-02 17:59:26.755	61887	61039	63034	65466
2014-10-02 17:59:26.759	61902	61049	63003	65492
2014-10-02 17:59:26.765	61900	61033	62996	65510
2014-10-02 17:59:26.769	61880	61032	63005	65490
2014-10-02 17:59:26.775	61895	61036	63000	65442
2014-10-02 17:59:26.779	61901	61023	63014	65420
2014-10-02 17:59:26.785	61889	61026	63021	65412
2014-10-02 17:59:26.789	61885	61025	63020	65401
2014-10-02 17:59:26.795	61889	61033	63023	65382
2014-10-02 17:59:26.799	61898	61047	63031	65367
2014-10-02 17:59:26.805	61893	61025	63049	65400
2014-10-02 17:59:26.809	61885	61019	63052	65412
2014-10-02 17:59:26.815	61884	61022	63059	65377
2014-10-02 17:59:26.819	61875	61018	63069	65383
2014-10-02 17:59:26.825	61882	61014	63072	65413
2014-10-02 17:59:26.829	61886	61023	63096	65434
2014-10-02 17:59:26.835	61890	61038	63100	65438
2014-10-02 17:59:26.839	61896	61019	63095	65418
2014-10-02 17:59:26.845	61893	61029	63084	65407
2014-10-02 17:59:26.849	61906	61051	63058	65387
2014-10-02 17:59:26.855	61892	61028	63047	65356
2014-10-02 17:59:26.859	61882	61024	63030	65363
2014-10-02 17:59:26.865	61890	61034	63011	65372
2014-10-02 17:59:26.869	61898	61024	63010	65371
2014-10-02 17:59:26.875	61905	61019	63004	65380
2014-10-02 17:59:26.880	61891	61041	62997	65414
2014-10-02 17:59:26.884	61903	61055	63004	65455
2014-10-02 17:59:26.890	61886	61037	63015	65473
2014-10-02 17:59:26.894	61871	61037	63016	65498
2014-10-02 17:59:26.900	61903	61045	63022	65522
2014-10-02 17:59:26.904	61901	61024	63035	65502
2014-10-02 17:59:26.910	61902	61017	63039	65467
2014-10-02 17:59:26.914	61895	61039	63041	65428
2014-10-02 17:59:26.920	61899	61042	63043	65375
2014-10-02 17:59:26.924	61913	61040	63048	65357
2014-10-02 17:59:26.930	61885	61036	63067	65348
2014-10-02 17:59:26.934	61879	61027	63070	65353
2014-10-02 17:59:26.940	61888	61037	63063	65374
2014-10-02 17:59:26.944	61897	61037	63065	65371
2014-10-02 17:59:26.950	61893	61026	63056	65377
2014-10-02 17:59:26.954	61896	61033	63044	65370
2014-10-02 17:59:26.960	61904	61035	63037	65367
2014-10-02 17:59:26.964	61895	61036	63010	65381
2014-10-02 17:59:26.970	61902	61051	62996	65401
2014-10-02 17:59:26.974	61881	61057	63014	65440
2014-10-02 17:59:26.980	61874	61053	63017	65433
2014-10-02 17:59:26.984	61899	61057	63008	65437
2014-10-02 17:59:26.990	61892	61044	63010	65455
2014-10-02 17:59:26.994	61880	61022	63007	65438
2014-10-02 17:59:27.000	61884	61028	63021	65432
2014-10-02 17:59:27.005	61892	61034	63034	65430
2014-10-02 17:59:27.009	61895	61030	63026	65441
2014-10-02 17:59:27.015	61881	61039	63048	65442
2014-10-02 17:59:27.019	61877	61039	63070	65409
2014-10-02 17:59:27.025	61905	61025	63072	65396
2014-10-02 17:59:27.029	61909	61023	63055	65375
2014-10-02 17:59:27.035	61886	61033	63034	65327
2014-10-02 17:59:27.039	61888	61016	63030	65297
2014-10-02 17:59:27.045	61900	61014	63024	65316
2014-10-02 17:59:27.049	61898	61034	63020	65348
2014-10-02 17:59:27.055	61883	61037	63012	65357
2014-10-02 17:59:27.059	61887	61043	63004	65390
2014-10-02 17:59:27.065	61901	61040	63018	65453
2014-10-02 17:59:27.069	61896	61032	63034	65491
2014-10-02 17:59:27.075	61886	61035	63040	65498
2014-10-02 17:59:27.079	61888	61032	63057	65484
2014-10-02 17:59:27.085	61912	61037	63059	65467
2014-10-02 17:59:27.089	61906	61038	63040	65450
2014-10-02 17:59:27.095	61892	61036	63035	65455
2014-10-02 17:59:27.099	61907	61052	63034	65470
2014-10-02 17:59:27.105	61894	61052	63027	65446
2014-10-02 17:59:27.109	61885	61042	63029	65429
2014-10-02 17:59:27.115	61891	61040	63024	65416
2014-10-02 17:59:27.119	61897	61036	63009	65365
2014-10-02 17:59:27.125	61899	61031	63004	65339
2014-10-02 17:59:27.130	61890	61041	63008	65322
2014-10-02 17:59:27.134	61893	61051	63019	65300
2014-10-02 17:59:27.140	61897	61038	63028	65314
2014-10-02 17:59:27.144	61897	61044	63028	65360
2014-10-02 17:59:27.150	61903	61059	63041	65406
2014-10-02 17:59:27.154	61893	61045	63049	65422
2014-10-02 17:59:27.160	61888	61030	63044	65445
2014-10-02 17:59:27.164	61902	61034	63054	65466
2014-10-02 17:59:27.170	61884	61034	63055	65453
2014-10-02 17:59:27.174	61873	61038	63032	65446
2014-10-02 17:59:27.180	61891	61048	63034	65435
2014-10-02 17:59:27.184	61894	61043	63044	65447
2014-10-02 17:59:27.190	61894	61041	63033	65459
2014-10-02 17:59:27.194	61896	61041	63033	65440
2014-10-02 17:59:27.200	61896	61047	63025	65434
2014-10-02 17:59:27.204	61902	61040	63000	65379
2014-10-02 17:59:27.210	61898	61032	63000	65344
2014-10-02 17:59:27.214	61883	61050	63015	65363
2014-10-02 17:59:27.220	61889	61046	63028	65365
2014-10-02 17:59:27.224	61891	61047	63036	65374
2014-10-02 17:59:27.230	61891	61053	63026	65372
2014-10-02 17:59:27.234	61903	61044	63033	65398
2014-10-02 17:59:27.240	61899	61048	63035	65421
2014-10-02 17:59:27.244	61898	61049	63033	65385
2014-10-02 17:59:27.250	61895	61037	63045	65388
2014-10-02 17:59:27.255	61895	61029	63041	65401
2014-10-02 17:59:27.259	61894	61028	63049	65381
2014-10-02 17:59:27.265	61890	61030	63058	65380
2014-10-02 17:59:27.269	61889	61042	63047	65392
2014-10-02 17:59:27.275	61897	61050	63060	65407
2014-10-02 17:59:27.279	61912	61055	63057	65416
2014-10-02 17:59:27.285	61895	61047	63028	65432
2014-10-02 17:59:27.289	61897	61027	63029	65450
2014-10-02 17:59:27.295	61906	61045	63034	65456
2014-10-02 17:59:27.299	61891	61042	63022	65478
2014-10-02 17:59:27.305	61892	61033	63018	65456
2014-10-02 17:59:27.309	61893	61051	63014	65394
2014-10-02 17:59:27.315	61904	61049	63015	65378
2014-10-02 17:59:27.319	61900	61056	63021	65356
2014-10-02 17:59:27.325	61882	61054	63030	65340
2014-10-02 17:59:27.329	61890	61046	63032	65364
2014-10-02 17:59:27.335	61897	61053	63010	65359
2014-10-02 17:59:27.339	61903	61047	63014	65368
2014-10-02 17:59:27.345	61899	61042	63029	65379
2014-10-02 17:59:27.349	61892	61040	63031	65376
2014-10-02 17:59:27.355	61893	61045	63032	65397
2014-10-02 17:59:27.359	61887	61046	63022	65406
2014-10-02 17:59:27.365	61890	61048	63029	65434
2014-10-02 17:59:27.369	61894	61047	63043	65469
2014-10-02 17:59:27.375	61899	61045	63031	65477
2014-10-02 17:59:27.380	61892	61051	63009	65456
2014-10-02 17:59:27.384	61890	61046	63009	65425
2014-10-02 17:59:27.390	61904	61045	63020	65440
2014-10-02 17:59:27.394	61892	61039	63027	65461
2014-10-02 17:59:27.400	61892	61044	63040	65458
2014-10-02 17:59:27.404	61892	61050	63037	65440
2014-10-02 17:59:27.410	61884	61056	63032	65404
2014-10-02 17:59:27.414	61898	61064	63034	65337
2014-10-02 17:59:27.420	61890	61035	63032	65275
2014-10-02 17:59:27.424	61885	61031	63027	65272
2014-10-02 17:59:27.430	61898	61045	63023	65282
2014-10-02 17:59:27.434	61901	61038	63020	65298
2014-10-02 17:59:27.440	61904	61050	63022	65342
2014-10-02 17:59:27.444	61896	61056	63030	65397
2014-10-02 17:59:27.450	61901	61030	63035	65447
2014-10-02 17:59:27.454	61913	61036	63046	65506
2014-10-02 17:59:27.460	61889	61051	63058	65549
2014-10-02 17:59:27.464	61883	61026	63057	65522
2014-10-02 17:59:27.470	61898	61029	63049	65475
2014-10-02 17:59:27.474	61904	61041	63050	65434
2014-10-02 17:59:27.480	61902	61034	63059	65411
2014-10-02 17:59:27.484	61897	61046	63049	65415
2014-10-02 17:59:27.490	61903	61058	63032	65409
2014-10-02 17:59:27.494	61894	61055	63017	65419
2014-10-02 17:59:27.500	61890	61042	62996	65404
2014-10-02 17:59:27.505	61904	61036	62975	65344
2014-10-02 17:59:27.509	61899	61032	62979	65307
2014-10-02 17:59:27.515	61907	61038	62999	65292
2014-10-02 17:59:27.519	61904	61040	63013	65288
2014-10-02 17:59:27.525	61901	61029	63027	65308
2014-10-02 17:59:27.529	61913	61049	63028	65365
2014-10-02 17:59:27.535	61894	61068	63044	65405
2014-10-02 17:59:27.539	61882	61061	63062	65428
2014-10-02 17:59:27.545	61892	61044	63056	65470
2014-10-02 17:59:27.549	61901	61044	63072	65477
2014-10-02 17:59:27.555	61907	61050	63077	65471
2014-10-02 17:59:27.559	61910	61038	63050	65488
2014-10-02 17:59:27.565	61916	61035	63045	65469
2014-10-02 17:59:27.569	61910	61043	63053	65452
2014-10-02 17:59:27.575	61904	61044	63056	65467
2014-10-02 17:59:27.579	61898	61040	63049	65448
2014-10-02 17:59:27.585	61897	61049	63048	65412
2014-10-02 17:59:27.589	61894	61050	63053	65371
2014-10-02 17:59:27.595	61897	61023	63053	65324
2014-10-02 17:59:27.599	61912	61017	63043	65309
2014-10-02 17:59:27.605	61904	61026	63019	65321
2014-10-02 17:59:27.609	61916	61034	63033	65356
2014-10-02 17:59:27.615	61920	61053	63053	65374
2014-10-02 17:59:27.619	61889	61053	63039	65369
2014-10-02 17:59:27.625	61899	61044	63045	65373
2014-10-02 17:59:27.630	61906	61048	63038	65355
2014-10-02 17:59:27.634	61907	61043	63025	65354
2014-10-02 17:59:27.640	61911	61031	63031	65378
2014-10-02 17:59:27.644	61899	61046	63026	65423
2014-10-02 17:59:27.650	61904	61045	63017	65496
2014-10-02 17:59:27.654	61905	61030	63004	65522
2014-10-02 17:59:27.660	61904	61053	63006	65529
2014-10-02 17:59:27.664	61894	61058	63019	65521
2014-10-02 17:59:27.670	61882	61035	63017	65467
2014-10-02 17:59:27.674	61891	61049	63027	65435
2014-10-02 17:59:27.680	61895	61049	63040	65416
2014-10-02 17:59:27.684	61893	61013	63038	65391
2014-10-02 17:59:27.690	61886	61029	63045	65390
2014-10-02 17:59:27.694	61893	61048	63053	65371
2014-10-02 17:59:27.700	61900	61029	63042	65344
2014-10-02 17:59:27.704	61892	61045	63039	65313
2014-10-02 17:59:27.710	61903	61060	63048	65313
2014-10-02 17:59:27.714	61905	61041	63057	65362
2014-10-02 17:59:27.720	61893	61038	63054	65377
2014-10-02 17:59:27.724	61900	61034	63048	65395
2014-10-02 17:59:27.730	61916	61021	63048	65419
2014-10-02 17:59:27.734	61912	61039	63048	65388
2014-10-02 17:59:27.740	61896	61057	63046	65386
2014-10-02 17:59:27.744	61905	61056	63039	65406
2014-10-02 17:59:27.750	61912	61057	63028	65402
2014-10-02 17:59:27.755	61898	61054	63022	65436
2014-10-02 17:59:27.759	61897	61054	63020	65486
2014-10-02 17:59:27.765	61910	61048	63031	65501
2014-10-02 17:59:27.769	61906	61037	63040	65498
2014-10-02 17:59:27.775	61900	61035	63045	65500
2014-10-02 17:59:27.779	61913	61029	63053	65501
2014-10-02 17:59:27.785	61904	61043	63050	65476
2014-10-02 17:59:27.789	61897	61048	63029	65438
2014-10-02 17:59:27.795	61907	61038	63014	65386
2014-10-02 17:59:27.799	61898	61047	63015	65335
2014-10-02 17:59:27.805	61896	61044	63012	65321
2014-10-02 17:59:27.809	61883	61029	63008	65318
2014-10-02 17:59:27.815	61887	61025	62999	65325
2014-10-02 17:59:27.819	61908	61045	62996	65338
2014-10-02 17:59:27.825	61891	61048	63008	65368
2014-10-02 17:59:27.829	61898	61037	63012	65385
2014-10-02 17:59:27.835	61915	61054	63026	65376
2014-10-02 17:59:27.839	61906	61067	63042	65398
2014-10-02 17:59:27.845	61897	61048	63057	65420
2014-10-02 17:59:27.849	61904	61032	63074	65443
2014-10-02 17:59:27.855	61912	61038	63084	65457
2014-10-02 17:59:27.859	61896	61039	63094	65444
2014-10-02 17:59:27.865	61895	61026	63096	65432
2014-10-02 17:59:27.869	61916	61035	63101	65423
2014-10-02 17:59:27.875	61918	61053	63085	65434
2014-10-02 17:59:27.880	61900	61043	63057	65457
2014-10-02 17:59:27.884	61898	61054	63051	65490
2014-10-02 17:59:27.890	61912	61060	63048	65512
2014-10-02 17:59:27.894	61912	61029	63044	65497
2014-10-02 17:59:27.900	61905	61035	63046	65454
2014-10-02 17:59:27.904	61907	61039	63054	65405
2014-10-02 17:59:27.910	61917	61045	63052	65374
2014-10-02 17:59:27.914	61914	61061	63043	65366
2014-10-02 17:59:27.920	61902	61053	63034	65347
2014-10-02 17:59:27.924	61906	61058	63019	65317
2014-10-02 17:59:27.930	61907	61056	63022	65342
2014-10-02 17:59:27.934	61912	61048	63033	65384
2014-10-02 17:59:27.940	61908	61034	63045	65377
2014-10-02 17:59:27.944	61893	61044	63052	65376
2014-10-02 17:59:27.950	61908	61065	63060	65397
2014-10-02 17:59:27.954	61922	61048	63069	65404
2014-10-02 17:59:27.960	61906	61045	63055	65439
2014-10-02 17:59:27.964	61907	61052	63038	65476
2014-10-02 17:59:27.970	61927	61051	63036	65452
2014-10-02 17:59:27.974	61914	61048	63058	65465
2014-10-02 17:59:27.980	61908	61035	63075	65475
2014-10-02 17:59:27.984	61910	61035	63067	65440
2014-10-02 17:59:27.990	61906	61053	63056	65445
2014-10-02 17:59:27.994	61921	61076	63040	65438
2014-10-02 17:59:28.000	61925	61064	63045	65430
2014-10-02 17:59:28.005	61918	61046	63058	65434
2014-10-02 17:59:28.009	61917	61051	63041	65417
2014-10-02 17:59:28.015	61906	61040	63034	65417
2014-10-02 17:59:28.019	61904	61041	63044	65406
2014-10-02 17:59:28.025	61915	61051	63063	65418
2014-10-02 17:59:28.029	61912	61041	63070	65433
2014-10-02 17:59:28.035	61905	61022	63067	65424
2014-10-02 17:59:28.039	61913	61020	63065	65429
2014-10-02 17:59:28.045	61920	61056	63053	65398
2014-10-02 17:59:28.049	61921	61064	63049	65367
2014-10-02 17:59:28.055	61915	61042	63035	65347
2014-10-02 17:59:28.059	61913	61045	63026	65354
2014-10-02 17:59:28.065	61921	61045	63048	65396
2014-10-02 17:59:28.069	61923	61031	63053	65420
2014-10-02 17:59:28.075	61921	61050	63046	65446
2014-10-02 17:59:28.079	61907	61059	63064	65444
2014-10-02 17:59:28.085	61904	61040	63076	65454
2014-10-02 17:59:28.089	61919	61058	63070	65473
2014-10-02 17:59:28.095	61917	61062	63080	65446
2014-10-02 17:59:28.099	61905	61053	63091	65440
2014-10-02 17:59:28.105	61911	61045	63091	65448
2014-10-02 17:59:28.109	61923	61045	63088	65450
2014-10-02 17:59:28.115	61910	61065	63082	65427
2014-10-02 17:59:28.119	61906	61040	63069	65406
2014-10-02 17:59:28.125	61912	61036	63063	65387
2014-10-02 17:59:28.130	61907	61063	63076	65367
2014-10-02 17:59:28.134	61919	61058	63065	65401
2014-10-02 17:59:28.140	61929	61053	63049	65428
2014-10-02 17:59:28.144	61929	61051	63057	65427
2014-10-02 17:59:28.150	61920	61052	63057	65408
2014-10-02 17:59:28.154	61919	61043	63055	65396
2014-10-02 17:59:28.160	61931	61046	63056	65403
2014-10-02 17:59:28.164	61912	61059	63048	65409
2014-10-02 17:59:28.170	61919	61040	63048	65452
2014-10-02 17:59:28.174	61934	61040	63061	65478
2014-10-02 17:59:28.180	61921	61056	63073	65486
2014-10-02 17:59:28.184	61925	61062	63082	65502
2014-10-02 17:59:28.190	61918	61058	63092	65483
2014-10-02 17:59:28.194	61913	61044	63095	65467
2014-10-02 17:59:28.200	61919	61052	63083	65435
2014-10-02 17:59:28.204	61929	61048	63069	65404
2014-10-02 17:59:28.210	61924	61041	63077	65382
2014-10-02 17:59:28.214	61901	61054	63078	65331
2014-10-02 17:59:28.220	61921	61051	63062	65344
2014-10-02 17:59:28.224	61917	61057	63058	65387
2014-10-02 17:59:28.230	61908	61061	63035	65409
2014-10-02 17:59:28.234	61921	61060	63011	65428
2014-10-02 17:59:28.240	61906	61047	63006	65420
2014-10-02 17:59:28.244	61923	61037	63014	65445
2014-10-02 17:59:28.250	61918	61043	63038	65473
2014-10-02 17:59:28.255	61914	61030	63062	65454
2014-10-02 17:59:28.259	61937	61032	63072	65430
2014-10-02 17:59:28.265	61921	61034	63083	65410
2014-10-02 17:59:28.269	61926	61044	63097	65402
2014-10-02 17:59:28.275	61922	61060	63095	65423
2014-10-02 17:59:28.279	61906	61039	63105	65453
2014-10-02 17:59:28.285	61928	61039	63108	65491
2014-10-02 17:59:28.289	61929	61048	63084	65513
2014-10-02 17:59:28.295	61926	61043	63073	65465
2014-10-02 17:59:28.299	61931	61050	63070	65421
2014-10-02 17:59:28.305	61920	61048	63080	65397
2014-10-02 17:59:28.309	61923	61051	63080	65364
2014-10-02 17:59:28.315	61920	61058	63069	65375
2014-10-02 17:59:28.319	61918	61057	63076	65395
2014-10-02 17:59:28.325	61934	61048	63083	65412
2014-10-02 17:59:28.329	61929	61037	63091	65448
2014-10-02 17:59:28.335	61920	61036	63081	65463
2014-10-02 17:59:28.339	61928	61041	63066	65436
2014-10-02 17:59:28.345	61933	61043	63071	65412
2014-10-02 17:59:28.349	61935	61053	63078	65412
2014-10-02 17:59:28.355	61924	61058	63071	65409
2014-10-02 17:59:28.359	61926	61053	63059	65411
2014-10-02 17:59:28.365	61925	61055	63063	65424
2014-10-02 17:59:28.369	61910	61036	63064	65452
2014-10-02 17:59:28.375	61919	61028	63071	65468
2014-10-02 17:59:28.380	61936	61034	63063	65463
2014-10-02 17:59:28.384	61936	61032	63038	65490
2014-10-02 17:59:28.390	61931	61045	63045	65488
2014-10-02 17:59:28.394	61929	61045	63046	65447
2014-10-02 17:59:28.400	61929	61046	63047	65434
2014-10-02 17:59:28.404	61928	61052	63055	65453
2014-10-02 17:59:28.410	61925	61054	63053	65469
2014-10-02 17:59:28.414	61925	61056	63065	65443
2014-10-02 17:59:28.420	61926	61042	63073	65418
2014-10-02 17:59:28.424	61922	61041	63083	65402
2014-10-02 17:59:28.430	61935	61035	63072	65373
2014-10-02 17:59:28.434	61939	61030	63048	65370
2014-10-02 17:59:28.440	61924	61056	63070	65381
2014-10-02 17:59:28.444	61927	61049	63083	65368
2014-10-02 17:59:28.450	61917	61024	63099	65378
2014-10-02 17:59:28.454	61919	61028	63103	65419
2014-10-02 17:59:28.460	61935	61034	63080	65416
2014-10-02 17:59:28.464	61915	61030	63095	65423
2014-10-02 17:59:28.470	61918	61008	63100	65471
2014-10-02 17:59:28.474	61935	61013	63090	65480
2014-10-02 17:59:28.480	61930	61043	63091	65469
2014-10-02 17:59:28.484	61928	61031	63088	65477
2014-10-02 17:59:28.490	61916	61037	63078	65460
2014-10-02 17:59:28.494	61926	61051	63055	65423
2014-10-02 17:59:28.500	61924	61044	63047	65438
2014-10-02 17:59:28.505	61908	61036	63058	65464
2014-10-02 17:59:28.509	61929	61024	63067	65445
2014-10-02 17:59:28.515	61931	61034	63086	65442
2014-10-02 17:59:28.519	61921	61045	63088	65439
2014-10-02 17:59:28.525	61917	61046	63076	65401
2014-10-02 17:59:28.529	61915	61036	63090	65387
2014-10-02 17:59:28.535	61932	61029	63081	65364
2014-10-02 17:59:28.539	61931	61045	63072	65319
2014-10-02 17:59:28.545	61923	61035	63092	65328
2014-10-02 17:59:28.549	61923	61023	63092	65374
2014-10-02 17:59:28.555	61923	61029	63105	65406
2014-10-02 17:59:28.559	61930	61030	63128	65437
2014-10-02 17:59:28.565	61931	61035	63125	65465
2014-10-02 17:59:28.569	61922	61040	63121	65476
2014-10-02 17:59:28.575	61905	61044	63110	65474
2014-10-02 17:59:28.579	61916	61034	63101	65477
2014-10-02 17:59:28.585	61934	61029	63086	65476
2014-10-02 17:59:28.589	61916	61038	63064	65468
2014-10-02 17:59:28.595	61921	61041	63073	65484
2014-10-02 17:59:28.599	61937	61035	63078	65493
2014-10-02 17:59:28.605	61926	61037	63056	65482
2014-10-02 17:59:28.609	61928	61044	63057	65492
2014-10-02 17:59:28.615	61921	61048	63064	65500
2014-10-02 17:59:28.619	61918	61044	63060	65484
2014-10-02 17:59:28.625	61922	61037	63077	65438
2014-10-02 17:59:28.630	61905	61036	63073	65379
2014-10-02 17:59:28.634	61912	61028	63068	65327
2014-10-02 17:59:28.640	61929	61023	63081	65298
2014-10-02 17:59:28.644	61922	61020	63076	65314
2014-10-02 17:59:28.650	61922	61027	63089	65355
2014-10-02 17:59:28.654	61928	61043	63092	65418
2014-10-02 17:59:28.660	61929	61034	63076	65450
2014-10-02 17:59:28.664	61914	61032	63071	65457
2014-10-02 17:59:28.670	61909	61036	63074	65490
2014-10-02 17:59:28.674	61923	61027	63078	65491
2014-10-02 17:59:28.680	61916	61022	63082	65505
2014-10-02 17:59:28.684	61914	61023	63108	65521
2014-10-02 17:59:28.690	61926	61031	63121	65489
2014-10-02 17:59:28.694	61926	61034	63113	65470
2014-10-02 17:59:28.700	61929	61035	63113	65429
2014-10-02 17:59:28.704	61933	61033	63126	65418
2014-10-02 17:59:28.710	61921	61031	63129	65429
2014-10-02 17:59:28.714	61916	61032	63116	65376
2014-10-02 17:59:28.720	61940	61030	63120	65350
2014-10-02 17:59:28.724	61937	61020	63122	65351
2014-10-02 17:59:28.730	61926	61021	63125	65355
2014-10-02 17:59:28.734	61933	61030	63113	65395
2014-10-02 17:59:28.740	61925	61034	63082	65451
2014-10-02 17:59:28.744	61920	61035	63067	65503
2014-10-02 17:59:28.750	61918	61019	63052	65516
2014-10-02 17:59:28.755	61925	61024	63052	65489
2014-10-02 17:59:28.759	61921	61025	63053	65460
2014-10-02 17:59:28.765	61913	61025	63033	65463
2014-10-02 17:59:28.769	61929	61033	63022	65459
2014-10-02 17:59:28.775	61929	61013	63033	65452
2014-10-02 17:59:28.779	61936	61036	63061	65460
2014-10-02 17:59:28.785	61932	61049	63080	65423
2014-10-02 17:59:28.789	61912	61025	63091	65378
2014-10-02 17:59:28.795	61921	61017	63104	65362
2014-10-02 17:59:28.799	61931	61015	63125	65370
2014-10-02 17:59:28.805	61932	61017	63123	65398
2014-10-02 17:59:28.809	61931	61023	63116	65426
2014-10-02 17:59:28.815	61936	61018	63134	65450
2014-10-02 17:59:28.819	61925	61007	63143	65435
2014-10-02 17:59:28.825	61917	61029	63134	65425
2014-10-02 17:59:28.829	61933	61038	63105	65441
2014-10-02 17:59:28.835	61929	61028	63091	65438
2014-10-02 17:59:28.839	61927	61021	63084	65450
2014-10-02 17:59:28.845	61920	61018	63061	65482
2014-10-02 17:59:28.849	61911	61024	63056	65500
2014-10-02 17:59:28.855	61928	61027	63070	65458
2014-10-02 17:59:28.859	61926	61031	63088	65422
2014-10-02 17:59:28.865	61918	61021	63083	65452
2014-10-02 17:59:28.869	61923	61027	63068	65464
2014-10-02 17:59:28.875	61923	61046	63069	65481
2014-10-02 17:59:28.880	61927	61045	63088	65494
2014-10-02 17:59:28.884	61933	61028	63119	65484
2014-10-02 17:59:28.890	61929	61017	63104	65472
2014-10-02 17:59:28.894	61929	61033	63095	65449
2014-10-02 17:59:28.900	61933	61030	63105	65446
2014-10-02 17:59:28.904	61933	61026	63099	65398
2014-10-02 17:59:28.910	61934	61034	63124	65359
2014-10-02 17:59:28.914	61939	61042	63137	65377
2014-10-02 17:59:28.920	61945	61034	63114	65382
2014-10-02 17:59:28.924	61939	61013	63091	65391
2014-10-02 17:59:28.930	61928	61013	63073	65385
2014-10-02 17:59:28.934	61933	61019	63069	65405
2014-10-02 17:59:28.940	61943	61026	63076	65443
2014-10-02 17:59:28.944	61935	61024	63100	65477
2014-10-02 17:59:28.950	61926	61024	63109	65517
2014-10-02 17:59:28.954	61935	61034	63090	65507
2014-10-02 17:59:28.960	61941	61037	63094	65472
2014-10-02 17:59:28.964	61920	61034	63113	65465
2014-10-02 17:59:28.970	61909	61023	63117	65477
2014-10-02 17:59:28.974	61930	61023	63106	65481
2014-10-02 17:59:28.980	61940	61028	63100	65498
2014-10-02 17:59:28.984	61921	61026	63103	65487
2014-10-02 17:59:28.990	61926	61032	63093	65456
2014-10-02 17:59:28.994	61937	61037	63092	65445
2014-10-02 17:59:29.000	61935	61038	63090	65418
2014-10-02 17:59:29.005	61935	61030	63079	65402
2014-10-02 17:59:29.009	61924	61026	63101	65392
2014-10-02 17:59:29.015	61928	61034	63115	65377
2014-10-02 17:59:29.019	61926	61033	63106	65357
2014-10-02 17:59:29.025	61915	61026	63110	65382
2014-10-02 17:59:29.029	61930	61021	63119	65410
2014-10-02 17:59:29.035	61941	61022	63131	65384
2014-10-02 17:59:29.039	61938	61033	63130	65409
2014-10-02 17:59:29.045	61924	61034	63128	65448
2014-10-02 17:59:29.049	61926	61030	63132	65470
2014-10-02 17:59:29.055	61932	61030	63124	65522
2014-10-02 17:59:29.059	61919	61025	63122	65558
2014-10-02 17:59:29.065	61929	61029	63123	65541
2014-10-02 17:59:29.069	61935	61029	63113	65504
2014-10-02 17:59:29.075	61922	61030	63098	65501
2014-10-02 17:59:29.079	61923	61047	63099	65482
2014-10-02 17:59:29.085	61930	61042	63101	65429
2014-10-02 17:59:29.089	61943	61044	63090	65408
2014-10-02 17:59:29.095	61947	61045	63090	65385
2014-10-02 17:59:29.099	61947	61043	63089	65360
2014-10-02 17:59:29.105	61951	61047	63086	65393
2014-10-02 17:59:29.109	61947	61033	63087	65429
2014-10-02 17:59:29.115	61930	61039	63080	65429
2014-10-02 17:59:29.119	61933	61051	63084	65447
2014-10-02 17:59:29.125	61955	61041	63099	65488
2014-10-02 17:59:29.130	61947	61037	63114	65508
2014-10-02 17:59:29.134	61936	61036	63119	65497
2014-10-02 17:59:29.140	61941	61036	63109	65488
2014-10-02 17:59:29.144	61938	61050	63108	65481
2014-10-02 17:59:29.150	61941	61048	63125	65481
2014-10-02 17:59:29.154	61948	61036	63137	65485
2014-10-02 17:59:29.160	61939	61041	63132	65471
2014-10-02 17:59:29.164	61934	61038	63130	65480
2014-10-02 17:59:29.170	61950	61035	63130	65468
2014-10-02 17:59:29.174	61944	61034	63129	65444
2014-10-02 17:59:29.180	61936	61044	63143	65455
2014-10-02 17:59:29.184	61948	61050	63160	65437
2014-10-02 17:59:29.190	61935	61040	63155	65438
2014-10-02 17:59:29.194	61943	61040	63141	65460
2014-10-02 17:59:29.200	61953	61044	63114	65439
2014-10-02 17:59:29.204	61946	61047	63095	65438
2014-10-02 17:59:29.210	61954	61039	63108	65456
2014-10-02 17:59:29.214	61952	61040	63119	65434
2014-10-02 17:59:29.220	61949	61054	63119	65410
2014-10-02 17:59:29.224	61938	61048	63102	65415
2014-10-02 17:59:29.230	61930	61035	63088	65436
2014-10-02 17:59:29.234	61942	61036	63079	65452
2014-10-02 17:59:29.240	61946	61031	63072	65469
2014-10-02 17:59:29.244	61942	61018	63093	65501
2014-10-02 17:59:29.250	61944	61020	63103	65497
2014-10-02 17:59:29.255	61959	61031	63103	65488
2014-10-02 17:59:29.259	61958	61044	63109	65506
2014-10-02 17:59:29.265	61941	61046	63107	65483
2014-10-02 17:59:29.269	61946	61046	63111	65464
2014-10-02 17:59:29.275	61960	61054	63116	65460
2014-10-02 17:59:29.279	61958	61039	63118	65445
2014-10-02 17:59:29.285	61954	61026	63128	65450
2014-10-02 17:59:29.289	61961	61032	63142	65436
2014-10-02 17:59:29.295	61958	61051	63155	65428
2014-10-02 17:59:29.299	61953	61064	63181	65448
2014-10-02 17:59:29.305	61963	61043	63202	65480
2014-10-02 17:59:29.309	61966	61041	63198	65522
2014-10-02 17:59:29.315	61963	61057	63172	65521
2014-10-02 17:59:29.319	61960	61042	63156	65507
2014-10-02 17:59:29.325	61958	61034	63161	65483
2014-10-02 17:59:29.329	61960	61051	63147	65426
2014-10-02 17:59:29.335	61953	61040	63119	65402
2014-10-02 17:59:29.339	61954	61041	63119	65430
2014-10-02 17:59:29.345	61965	61061	63129	65457
2014-10-02 17:59:29.349	61967	61059	63108	65473
2014-10-02 17:59:29.355	61966	61068	63092	65480
2014-10-02 17:59:29.359	61958	61050	63095	65474
2014-10-02 17:59:29.365	61958	61034	63095	65454
2014-10-02 17:59:29.369	61955	61057	63105	65444
2014-10-02 17:59:29.375	61966	61048	63109	65458
2014-10-02 17:59:29.380	61979	61039	63103	65469
2014-10-02 17:59:29.384	61954	61060	63110	65478
2014-10-02 17:59:29.390	61958	61067	63129	65504
2014-10-02 17:59:29.394	61972	61059	63136	65520
2014-10-02 17:59:29.400	61956	61064	63126	65507
2014-10-02 17:59:29.404	61956	61057	63126	65512
2014-10-02 17:59:29.410	61950	61041	63130	65542
2014-10-02 17:59:29.414	61962	61048	63139	65537
2014-10-02 17:59:29.420	61971	61043	63147	65524
2014-10-02 17:59:29.424	61961	61039	63158	65522
2014-10-02 17:59:29.430	61963	61055	63177	65489
2014-10-02 17:59:29.434	61954	61067	63175	65436
2014-10-02 17:59:29.440	61964	61064	63185	65403
2014-10-02 17:59:29.444	61968	61057	63188	65403
2014-10-02 17:59:29.450	61954	61066	63161	65421
2014-10-02 17:59:29.454	61968	61067	63170	65461
2014-10-02 17:59:29.460	61965	61058	63172	65470
2014-10-02 17:59:29.464	61957	61060	63137	65452
2014-10-02 17:59:29.470	61962	61061	63123	65443
2014-10-02 17:59:29.474	61966	61067	63113	65445
2014-10-02 17:59:29.480	61967	61077	63127	65482
2014-10-02 17:59:29.484	61966	61066	63151	65501
2014-10-02 17:59:29.490	61979	61064	63151	65545
2014-10-02 17:59:29.494	61975	61055	63155	65580
2014-10-02 17:59:29.500	61966	61050	63136	65526
2014-10-02 17:59:29.505	61981	61067	63132	65509
2014-10-02 17:59:29.509	61982	61060	63167	65497
2014-10-02 17:59:29.515	61979	61073	63162	65483
2014-10-02 17:59:29.519	61967	61071	63150	65510
2014-10-02 17:59:29.525	61972	61058	63149	65504
2014-10-02 17:59:29.529	61991	61076	63141	65495
2014-10-02 17:59:29.535	61972	61059	63161	65459
2014-10-02 17:59:29.539	61980	61049	63176	65442
2014-10-02 17:59:29.545	61995	61059	63168	65442
2014-10-02 17:59:29.549	61990	61053	63153	65413
2014-10-02 17:59:29.555	61993	61058	63145	65457
2014-10-02 17:59:29.559	61974	61073	63154	65488
2014-10-02 17:59:29.565	61982	61082	63157	65496
2014-10-02 17:59:29.569	61996	61090	63146	65540
2014-10-02 17:59:29.575	61982	61086	63140	65540
2014-10-02 17:59:29.579	61987	61063	63139	65520
2014-10-02 17:59:29.585	61989	61066	63144	65511
2014-10-02 17:59:29.589	61999	61069	63150	65518
2014-10-02 17:59:29.595	61996	61065	63136	65507
2014-10-02 17:59:29.599	61988	61081	63128	65501
2014-10-02 17:59:29.605	62001	61079	63149	65524
2014-10-02 17:59:29.609	61990	61079	63156	65532
2014-10-02 17:59:29.615	61992	61071	63154	65546
2014-10-02 17:59:29.619	61988	61066	63150	65549
2014-10-02 17:59:29.625	61979	61066	63144	65516
2014-10-02 17:59:29.630	61992	61060	63157	65481
2014-10-02 17:59:29.634	61986	61077	63176	65438
2014-10-02 17:59:29.640	61985	61069	63183	65395
2014-10-02 17:59:29.644	61979	61079	63173	65404
2014-10-02 17:59:29.650	61985	61103	63177	65445
2014-10-02 17:59:29.654	62004	61094	63179	65468
2014-10-02 17:59:29.660	61993	61094	63159	65492
2014-10-02 17:59:29.664	61992	61071	63157	65507
2014-10-02 17:59:29.670	61984	61069	63160	65515
2014-10-02 17:59:29.674	61983	61080	63168	65533
2014-10-02 17:59:29.680	62000	61070	63173	65539
2014-10-02 17:59:29.684	61992	61076	63181	65568
2014-10-02 17:59:29.690	61992	61077	63207	65599
2014-10-02 17:59:29.694	61999	61092	63197	65580
2014-10-02 17:59:29.700	62009	61088	63185	65598
2014-10-02 17:59:29.704	62007	61071	63203	65598
2014-10-02 17:59:29.710	61997	61083	63191	65547
2014-10-02 17:59:29.714	62012	61070	63170	65528
2014-10-02 17:59:29.720	62006	61068	63164	65513
2014-10-02 17:59:29.724	61995	61091	63163	65491
2014-10-02 17:59:29.730	62013	61097	63170	65448
2014-10-02 17:59:29.734	62011	61103	63170	65428
2014-10-02 17:59:29.740	62001	61092	63168	65420
2014-10-02 17:59:29.744	62005	61081	63167	65392
2014-10-02 17:59:29.750	61993	61090	63165	65413
2014-10-02 17:59:29.755	62000	61083	63162	65444
2014-10-02 17:59:29.759	62008	61083	63173	65461
2014-10-02 17:59:29.765	61993	61086	63177	65507
2014-10-02 17:59:29.769	62004	61086	63176	65570
2014-10-02 17:59:29.775	62020	61098	63198	65619
2014-10-02 17:59:29.779	62020	61092	63199	65621
2014-10-02 17:59:29.785	62018	61086	63198	65599
2014-10-02 17:59:29.789	62014	61098	63188	65578
2014-10-02 17:59:29.795	62006	61094	63179	65520
2014-10-02 17:59:29.799	62008	61077	63185	65489
2014-10-02 17:59:29.805	62016	61080	63175	65502
2014-10-02 17:59:29.809	62021	61085	63185	65497
2014-10-02 17:59:29.815	62012	61090	63191	65508
2014-10-02 17:59:29.819	62001	61101	63185	65508
2014-10-02 17:59:29.825	62008	61099	63176	65508
2014-10-02 17:59:29.829	62008	61109	63174	65529
2014-10-02 17:59:29.835	62007	61106	63198	65533
2014-10-02 17:59:29.839	62007	61094	63199	65534
2014-10-02 17:59:29.845	61999	61102	63186	65529
2014-10-02 17:59:29.849	62011	61080	63186	65518
2014-10-02 17:59:29.855	62021	61082	63193	65506
2014-10-02 17:59:29.859	62014	61105	63199	65511
2014-10-02 17:59:29.865	62025	61099	63206	65501
2014-10-02 17:59:29.869	62025	61096	63201	65488
2014-10-02 17:59:29.875	62000	61087	63181	65526
2014-10-02 17:59:29.880	62020	61110	63183	65566
2014-10-02 17:59:29.884	62040	61117	63195	65610
2014-10-02 17:59:29.890	62002	61090	63187	65598
2014-10-02 17:59:29.894	62012	61098	63171	65555
2014-10-02 17:59:29.900	62031	61101	63171	65545
2014-10-02 17:59:29.904	62012	61104	63173	65522
2014-10-02 17:59:29.910	62019	61098	63171	65522
2014-10-02 17:59:29.914	62023	61097	63183	65514
2014-10-02 17:59:29.920	62026	61097	63196	65494
2014-10-02 17:59:29.924	62012	61093	63201	65472
2014-10-02 17:59:29.930	62009	61110	63204	65457
2014-10-02 17:59:29.934	62014	61103	63199	65491
2014-10-02 17:59:29.940	62011	61104	63198	65528
2014-10-02 17:59:29.944	62030	61113	63210	65566
2014-10-02 17:59:29.950	62022	61108	63201	65583
2014-10-02 17:59:29.954	62024	61113	63182	65546
2014-10-02 17:59:29.960	62033	61111	63196	65500
2014-10-02 17:59:29.964	62022	61118	63203	65488
2014-10-02 17:59:29.970	62025	61119	63192	65502
2014-10-02 17:59:29.974	62032	61108	63205	65522
2014-10-02 17:59:29.980	62030	61105	63207	65546
2014-10-02 17:59:29.984	62022	61105	63193	65555
2014-10-02 17:59:29.990	62026	61099	63191	65562
2014-10-02 17:59:29.994	62032	61113	63192	65571
[truncated: 10,800 more rows]
