# Supplementary material for: Seismic monitoring of small alpine rockfalls – validity, precision and limitations
Source: Copernicus journal article supplement (doi:10.5194/esurf-5-653-2017), 2017-10-16
Supplement: Supplementary file 2 [file esurf-5-653-2017-supplement.zip › event_7.txt]

Time	LAU02	LAU03	LAU04	LAU05
2014-09-25 07:02:43.005	58800	56157	61622	63229
2014-09-25 07:02:43.009	58808	56165	61610	63179
2014-09-25 07:02:43.015	58815	56156	61614	63122
2014-09-25 07:02:43.019	58817	56162	61624	63084
2014-09-25 07:02:43.025	58812	56166	61665	63087
2014-09-25 07:02:43.029	58813	56163	61690	63096
2014-09-25 07:02:43.035	58820	56185	61672	63098
2014-09-25 07:02:43.039	58822	56166	61643	63114
2014-09-25 07:02:43.045	58808	56157	61630	63095
2014-09-25 07:02:43.049	58803	56157	61609	63095
2014-09-25 07:02:43.055	58812	56163	61621	63138
2014-09-25 07:02:43.059	58809	56159	61638	63124
2014-09-25 07:02:43.065	58814	56163	61606	63092
2014-09-25 07:02:43.069	58822	56168	61620	63104
2014-09-25 07:02:43.075	58819	56167	61638	63139
2014-09-25 07:02:43.079	58795	56181	61649	63194
2014-09-25 07:02:43.085	58792	56171	61672	63200
2014-09-25 07:02:43.089	58830	56183	61621	63188
2014-09-25 07:02:43.095	58819	56178	61595	63183
2014-09-25 07:02:43.099	58811	56171	61631	63169
2014-09-25 07:02:43.105	58810	56177	61662	63199
2014-09-25 07:02:43.109	58786	56181	61671	63227
2014-09-25 07:02:43.115	58807	56179	61645	63185
2014-09-25 07:02:43.119	58811	56172	61637	63131
2014-09-25 07:02:43.125	58800	56179	61649	63131
2014-09-25 07:02:43.130	58789	56172	61652	63140
2014-09-25 07:02:43.134	58783	56180	61655	63111
2014-09-25 07:02:43.140	58802	56178	61642	63088
2014-09-25 07:02:43.144	58801	56180	61610	63090
2014-09-25 07:02:43.150	58807	56174	61589	63085
2014-09-25 07:02:43.154	58797	56175	61605	63087
2014-09-25 07:02:43.160	58789	56179	61640	63105
2014-09-25 07:02:43.164	58808	56160	61628	63099
2014-09-25 07:02:43.170	58812	56177	61621	63105
2014-09-25 07:02:43.174	58823	56170	61678	63133
2014-09-25 07:02:43.180	58800	56171	61697	63164
2014-09-25 07:02:43.184	58796	56169	61691	63187
2014-09-25 07:02:43.190	58808	56163	61688	63195
2014-09-25 07:02:43.194	58794	56168	61613	63230
2014-09-25 07:02:43.200	58819	56156	61577	63236
2014-09-25 07:02:43.204	58807	56166	61625	63221
2014-09-25 07:02:43.210	58777	56152	61652	63208
2014-09-25 07:02:43.214	58791	56150	61635	63156
2014-09-25 07:02:43.220	58802	56149	61597	63124
2014-09-25 07:02:43.224	58813	56169	61613	63124
2014-09-25 07:02:43.230	58808	56178	61665	63123
2014-09-25 07:02:43.234	58790	56150	61683	63084
2014-09-25 07:02:43.240	58789	56178	61675	63011
2014-09-25 07:02:43.244	58800	56182	61633	63018
2014-09-25 07:02:43.250	58797	56162	61608	63036
2014-09-25 07:02:43.255	58792	56174	61626	63027
2014-09-25 07:02:43.259	58792	56183	61646	63083
2014-09-25 07:02:43.265	58786	56162	61635	63108
2014-09-25 07:02:43.269	58795	56162	61617	63124
2014-09-25 07:02:43.275	58794	56183	61627	63172
2014-09-25 07:02:43.279	58801	56178	61661	63196
2014-09-25 07:02:43.285	58803	56179	61700	63231
2014-09-25 07:02:43.289	58790	56175	61671	63238
2014-09-25 07:02:43.295	58791	56172	61598	63256
2014-09-25 07:02:43.299	58793	56163	61555	63242
2014-09-25 07:02:43.305	58802	56165	61554	63181
2014-09-25 07:02:43.309	58789	56173	61596	63180
2014-09-25 07:02:43.315	58790	56152	61618	63157
2014-09-25 07:02:43.319	58799	56161	61609	63124
2014-09-25 07:02:43.325	58782	56170	61608	63096
2014-09-25 07:02:43.329	58802	56154	61627	63064
2014-09-25 07:02:43.335	58796	56160	61660	63060
2014-09-25 07:02:43.339	58779	56167	61681	63035
2014-09-25 07:02:43.345	58799	56166	61659	63037
2014-09-25 07:02:43.349	58788	56151	61621	63033
2014-09-25 07:02:43.355	58798	56146	61635	63018
2014-09-25 07:02:43.359	58803	56161	61657	63065
2014-09-25 07:02:43.365	58783	56141	61647	63099
2014-09-25 07:02:43.369	58805	56148	61641	63106
2014-09-25 07:02:43.375	58806	56168	61631	63137
2014-09-25 07:02:43.380	58807	56137	61642	63181
2014-09-25 07:02:43.384	58798	56132	61684	63224
2014-09-25 07:02:43.390	58777	56132	61704	63237
2014-09-25 07:02:43.394	58799	56135	61669	63238
2014-09-25 07:02:43.400	58791	56142	61623	63239
2014-09-25 07:02:43.404	58792	56123	61604	63232
2014-09-25 07:02:43.410	58785	56134	61620	63214
2014-09-25 07:02:43.414	58760	56139	61637	63166
2014-09-25 07:02:43.420	58789	56131	61632	63104
2014-09-25 07:02:43.424	58793	56135	61614	63043
2014-09-25 07:02:43.430	58796	56149	61604	63002
2014-09-25 07:02:43.434	58801	56155	61638	63024
2014-09-25 07:02:43.440	58769	56139	61667	63047
2014-09-25 07:02:43.444	58778	56134	61658	63073
2014-09-25 07:02:43.450	58789	56143	61623	63129
2014-09-25 07:02:43.454	58785	56133	61571	63140
2014-09-25 07:02:43.460	58780	56135	61597	63110
2014-09-25 07:02:43.464	58774	56154	61633	63072
2014-09-25 07:02:43.470	58786	56145	61601	63045
2014-09-25 07:02:43.474	58786	56152	61576	63063
2014-09-25 07:02:43.480	58794	56154	61561	63118
2014-09-25 07:02:43.484	58791	56141	61601	63184
2014-09-25 07:02:43.490	58783	56143	61669	63188
2014-09-25 07:02:43.494	58784	56139	61680	63172
2014-09-25 07:02:43.500	58786	56133	61655	63200
2014-09-25 07:02:43.505	58820	56121	61601	63177
2014-09-25 07:02:43.509	58793	56125	61604	63156
2014-09-25 07:02:43.515	58762	56130	61652	63151
2014-09-25 07:02:43.519	58797	56135	61644	63095
2014-09-25 07:02:43.525	58788	56135	61616	63054
2014-09-25 07:02:43.529	58790	56126	61588	63040
2014-09-25 07:02:43.535	58801	56133	61603	63055
2014-09-25 07:02:43.539	58784	56123	61643	63079
2014-09-25 07:02:43.545	58791	56115	61641	63109
2014-09-25 07:02:43.549	58783	56122	61635	63164
2014-09-25 07:02:43.555	58777	56128	61594	63180
2014-09-25 07:02:43.559	58789	56115	61561	63174
2014-09-25 07:02:43.565	58776	56115	61604	63148
2014-09-25 07:02:43.569	58774	56125	61613	63085
2014-09-25 07:02:43.575	58773	56126	61587	63042
2014-09-25 07:02:43.579	58773	56128	61587	63031
2014-09-25 07:02:43.585	58774	56114	61583	63071
2014-09-25 07:02:43.589	58772	56125	61601	63127
2014-09-25 07:02:43.595	58785	56108	61623	63143
2014-09-25 07:02:43.599	58756	56115	61600	63168
2014-09-25 07:02:43.605	58764	56139	61562	63168
2014-09-25 07:02:43.609	58779	56117	61553	63136
2014-09-25 07:02:43.615	58746	56141	61597	63138
2014-09-25 07:02:43.619	58765	56133	61616	63131
2014-09-25 07:02:43.625	58763	56121	61610	63117
2014-09-25 07:02:43.630	58748	56137	61620	63112
2014-09-25 07:02:43.634	58781	56130	61607	63102
2014-09-25 07:02:43.640	58778	56125	61642	63107
2014-09-25 07:02:43.644	58758	56126	61681	63078
2014-09-25 07:02:43.650	58763	56127	61650	63061
2014-09-25 07:02:43.654	58778	56125	61593	63063
2014-09-25 07:02:43.660	58770	56128	61532	63045
2014-09-25 07:02:43.664	58759	56121	61567	63076
2014-09-25 07:02:43.670	58770	56121	61644	63096
2014-09-25 07:02:43.674	58762	56120	61647	63111
2014-09-25 07:02:43.680	58767	56136	61633	63136
2014-09-25 07:02:43.684	58779	56134	61625	63158
2014-09-25 07:02:43.690	58760	56107	61634	63180
2014-09-25 07:02:43.694	58763	56105	61667	63143
2014-09-25 07:02:43.700	58765	56096	61681	63140
2014-09-25 07:02:43.704	58768	56107	61644	63114
2014-09-25 07:02:43.710	58779	56104	61593	63063
2014-09-25 07:02:43.714	58762	56106	61621	63100
2014-09-25 07:02:43.720	58758	56133	61664	63104
2014-09-25 07:02:43.724	58759	56119	61640	63128
2014-09-25 07:02:43.730	58757	56101	61605	63140
2014-09-25 07:02:43.734	58777	56104	61572	63079
2014-09-25 07:02:43.740	58762	56086	61582	63062
2014-09-25 07:02:43.744	58761	56084	61638	63028
2014-09-25 07:02:43.750	58783	56100	61658	63034
2014-09-25 07:02:43.755	58762	56086	61633	63071
2014-09-25 07:02:43.759	58757	56097	61565	63069
2014-09-25 07:02:43.765	58763	56100	61538	63116
2014-09-25 07:02:43.769	58753	56107	61609	63128
2014-09-25 07:02:43.775	58744	56123	61648	63118
2014-09-25 07:02:43.779	58741	56101	61631	63123
2014-09-25 07:02:43.785	58767	56092	61607	63087
2014-09-25 07:02:43.789	58775	56105	61598	63116
2014-09-25 07:02:43.795	58766	56115	61640	63137
2014-09-25 07:02:43.799	58758	56093	61667	63112
2014-09-25 07:02:43.805	58745	56102	61647	63131
2014-09-25 07:02:43.809	58763	56110	61596	63116
2014-09-25 07:02:43.815	58767	56094	61550	63112
2014-09-25 07:02:43.819	58743	56122	61584	63113
2014-09-25 07:02:43.825	58735	56115	61635	63080
2014-09-25 07:02:43.829	58737	56102	61623	63073
2014-09-25 07:02:43.835	58768	56113	61586	63068
2014-09-25 07:02:43.839	58775	56107	61584	63104
2014-09-25 07:02:43.845	58758	56101	61628	63126
2014-09-25 07:02:43.849	58772	56095	61653	63082
2014-09-25 07:02:43.855	58761	56089	61638	63056
2014-09-25 07:02:43.859	58757	56098	61585	63045
2014-09-25 07:02:43.865	58771	56094	61515	63049
2014-09-25 07:02:43.869	58757	56088	61554	63075
2014-09-25 07:02:43.875	58754	56101	61619	63111
2014-09-25 07:02:43.880	58762	56097	61604	63121
2014-09-25 07:02:43.884	58771	56102	61573	63110
2014-09-25 07:02:43.890	58764	56110	61535	63126
2014-09-25 07:02:43.894	58763	56094	61574	63115
2014-09-25 07:02:43.900	58768	56066	61635	63076
2014-09-25 07:02:43.904	58745	56082	61611	63082
2014-09-25 07:02:43.910	58760	56118	61583	63143
2014-09-25 07:02:43.914	58758	56098	61545	63177
2014-09-25 07:02:43.920	58742	56099	61571	63157
2014-09-25 07:02:43.924	58762	56113	61650	63131
2014-09-25 07:02:43.930	58745	56104	61659	63104
2014-09-25 07:02:43.934	58749	56099	61644	63064
2014-09-25 07:02:43.940	58755	56098	61610	63011
2014-09-25 07:02:43.944	58751	56083	61621	63029
2014-09-25 07:02:43.950	58765	56085	61679	63065
2014-09-25 07:02:43.954	58748	56103	61666	63039
2014-09-25 07:02:43.960	58749	56102	61625	63050
2014-09-25 07:02:43.964	58759	56108	61577	63063
2014-09-25 07:02:43.970	58761	56108	61567	63066
2014-09-25 07:02:43.974	58745	56120	61623	63074
2014-09-25 07:02:43.980	58722	56105	61617	63084
2014-09-25 07:02:43.984	58749	56095	61589	63104
2014-09-25 07:02:43.990	58752	56104	61574	63086
2014-09-25 07:02:43.994	58746	56089	61568	63111
2014-09-25 07:02:44.000	58765	56098	61610	63137
2014-09-25 07:02:44.005	58746	56095	61638	63105
2014-09-25 07:02:44.009	58742	56121	61627	63104
2014-09-25 07:02:44.015	58765	56126	61562	63102
2014-09-25 07:02:44.019	58750	56098	61520	63126
2014-09-25 07:02:44.025	58756	56105	61589	63148
2014-09-25 07:02:44.029	58754	56096	61637	63131
2014-09-25 07:02:44.035	58741	56093	61633	63110
2014-09-25 07:02:44.039	58760	56087	61599	63052
2014-09-25 07:02:44.045	58750	56111	61585	63021
2014-09-25 07:02:44.049	58755	56113	61624	63030
2014-09-25 07:02:44.055	58748	56087	61658	63027
2014-09-25 07:02:44.059	58746	56111	61659	63042
2014-09-25 07:02:44.065	58781	56108	61576	63063
2014-09-25 07:02:44.069	58765	56098	61527	63077
2014-09-25 07:02:44.075	58752	56102	61575	63085
2014-09-25 07:02:44.079	58739	56083	61607	63090
2014-09-25 07:02:44.085	58745	56079	61602	63101
2014-09-25 07:02:44.089	58777	56103	61566	63113
2014-09-25 07:02:44.095	58749	56101	61562	63146
2014-09-25 07:02:44.099	58744	56093	61602	63166
2014-09-25 07:02:44.105	58756	56101	61625	63149
2014-09-25 07:02:44.109	58747	56109	61630	63138
2014-09-25 07:02:44.115	58765	56102	61574	63123
2014-09-25 07:02:44.119	58756	56082	61512	63098
2014-09-25 07:02:44.125	58734	56098	61546	63093
2014-09-25 07:02:44.130	58742	56095	61592	63099
2014-09-25 07:02:44.134	58740	56087	61605	63092
2014-09-25 07:02:44.140	58744	56098	61607	63087
2014-09-25 07:02:44.144	58756	56099	61599	63072
2014-09-25 07:02:44.150	58746	56112	61642	63039
2014-09-25 07:02:44.154	58749	56097	61669	63010
2014-09-25 07:02:44.160	58746	56097	61645	62977
2014-09-25 07:02:44.164	58742	56114	61611	62990
2014-09-25 07:02:44.170	58748	56099	61553	63061
2014-09-25 07:02:44.174	58750	56079	61555	63111
2014-09-25 07:02:44.180	58744	56097	61615	63148
2014-09-25 07:02:44.184	58727	56107	61654	63160
2014-09-25 07:02:44.190	58749	56093	61648	63139
2014-09-25 07:02:44.194	58767	56106	61606	63108
2014-09-25 07:02:44.200	58751	56111	61614	63103
2014-09-25 07:02:44.204	58762	56107	61653	63114
2014-09-25 07:02:44.210	58758	56104	61657	63101
2014-09-25 07:02:44.214	58753	56120	61617	63125
2014-09-25 07:02:44.220	58769	56105	61560	63138
2014-09-25 07:02:44.224	58755	56078	61545	63110
2014-09-25 07:02:44.230	58734	56102	61584	63093
2014-09-25 07:02:44.234	58745	56091	61627	63064
2014-09-25 07:02:44.240	58762	56094	61608	63045
2014-09-25 07:02:44.244	58759	56101	61572	63033
2014-09-25 07:02:44.250	58758	56089	61554	63035
2014-09-25 07:02:44.255	58760	56104	61573	63056
2014-09-25 07:02:44.259	58760	56086	61643	63046
2014-09-25 07:02:44.265	58763	56087	61617	63044
2014-09-25 07:02:44.269	58773	56102	61523	63085
2014-09-25 07:02:44.275	58761	56087	61498	63120
2014-09-25 07:02:44.279	58741	56084	61546	63094
2014-09-25 07:02:44.285	58753	56081	61622	63084
2014-09-25 07:02:44.289	58761	56080	61639	63122
2014-09-25 07:02:44.295	58759	56098	61595	63103
2014-09-25 07:02:44.299	58762	56102	61565	63107
2014-09-25 07:02:44.305	58755	56109	61602	63162
2014-09-25 07:02:44.309	58755	56114	61645	63160
2014-09-25 07:02:44.315	58769	56112	61613	63141
2014-09-25 07:02:44.319	58771	56132	61541	63135
2014-09-25 07:02:44.325	58757	56131	61486	63111
2014-09-25 07:02:44.329	58763	56095	61512	63063
2014-09-25 07:02:44.335	58766	56103	61581	63041
2014-09-25 07:02:44.339	58758	56113	61588	63042
2014-09-25 07:02:44.345	58758	56098	61561	63030
2014-09-25 07:02:44.349	58755	56123	61547	63032
2014-09-25 07:02:44.355	58759	56122	61587	63035
2014-09-25 07:02:44.359	58757	56097	61660	63022
2014-09-25 07:02:44.365	58744	56109	61705	63026
2014-09-25 07:02:44.369	58751	56128	61668	63045
2014-09-25 07:02:44.375	58755	56120	61589	63076
2014-09-25 07:02:44.380	58747	56086	61601	63112
2014-09-25 07:02:44.384	58757	56086	61627	63133
2014-09-25 07:02:44.390	58762	56103	61603	63169
2014-09-25 07:02:44.394	58748	56101	61594	63181
2014-09-25 07:02:44.400	58757	56104	61589	63167
2014-09-25 07:02:44.404	58775	56117	61598	63170
2014-09-25 07:02:44.410	58768	56101	61645	63148
2014-09-25 07:02:44.414	58745	56102	61675	63142
2014-09-25 07:02:44.420	58752	56115	61637	63133
2014-09-25 07:02:44.424	58764	56103	61588	63110
2014-09-25 07:02:44.430	58757	56095	61592	63082
2014-09-25 07:02:44.434	58765	56077	61627	63021
2014-09-25 07:02:44.440	58742	56091	61642	63017
2014-09-25 07:02:44.444	58731	56091	61606	63018
2014-09-25 07:02:44.450	58750	56089	61574	63013
2014-09-25 07:02:44.454	58755	56105	61600	63066
2014-09-25 07:02:44.460	58761	56096	61634	63083
2014-09-25 07:02:44.464	58745	56099	61646	63069
2014-09-25 07:02:44.470	58751	56093	61633	63090
2014-09-25 07:02:44.474	58766	56108	61567	63116
2014-09-25 07:02:44.480	58754	56104	61520	63127
2014-09-25 07:02:44.484	58768	56097	61564	63123
2014-09-25 07:02:44.490	58767	56115	61591	63131
2014-09-25 07:02:44.494	58757	56110	61563	63149
2014-09-25 07:02:44.500	58767	56117	61555	63131
2014-09-25 07:02:44.505	58773	56124	61561	63117
2014-09-25 07:02:44.509	58775	56134	61605	63120
2014-09-25 07:02:44.515	58752	56117	61657	63088
2014-09-25 07:02:44.519	58751	56101	61633	63058
2014-09-25 07:02:44.525	58782	56110	61597	63074
2014-09-25 07:02:44.529	58770	56101	61556	63096
2014-09-25 07:02:44.535	58745	56097	61544	63090
2014-09-25 07:02:44.539	58746	56095	61599	63096
2014-09-25 07:02:44.545	58759	56109	61613	63101
2014-09-25 07:02:44.549	58766	56111	61598	63064
2014-09-25 07:02:44.555	58757	56101	61602	63067
2014-09-25 07:02:44.559	58761	56110	61630	63100
2014-09-25 07:02:44.565	58757	56103	61655	63101
2014-09-25 07:02:44.569	58751	56088	61630	63108
2014-09-25 07:02:44.575	58772	56091	61607	63112
2014-09-25 07:02:44.579	58761	56105	61568	63102
2014-09-25 07:02:44.585	58742	56089	61564	63063
2014-09-25 07:02:44.589	58747	56087	61630	63030
2014-09-25 07:02:44.595	58755	56115	61616	63030
2014-09-25 07:02:44.599	58771	56108	61574	63038
2014-09-25 07:02:44.605	58770	56114	61584	63094
2014-09-25 07:02:44.609	58772	56124	61606	63125
2014-09-25 07:02:44.615	58768	56098	61652	63128
2014-09-25 07:02:44.619	58743	56101	61669	63130
2014-09-25 07:02:44.625	58750	56101	61641	63085
2014-09-25 07:02:44.630	58762	56095	61606	63075
2014-09-25 07:02:44.634	58768	56108	61580	63074
2014-09-25 07:02:44.640	58753	56097	61619	63067
2014-09-25 07:02:44.644	58734	56112	61647	63096
2014-09-25 07:02:44.650	58760	56123	61619	63098
2014-09-25 07:02:44.654	58761	56117	61603	63115
2014-09-25 07:02:44.660	58770	56117	61598	63127
2014-09-25 07:02:44.664	58779	56102	61629	63074
2014-09-25 07:02:44.670	58747	56114	61654	63035
2014-09-25 07:02:44.674	58760	56105	61638	63033
2014-09-25 07:02:44.680	58777	56095	61589	63070
2014-09-25 07:02:44.684	58756	56108	61537	63124
2014-09-25 07:02:44.690	58737	56110	61569	63123
2014-09-25 07:02:44.694	58743	56123	61609	63113
2014-09-25 07:02:44.700	58761	56117	61591	63114
2014-09-25 07:02:44.704	58750	56103	61578	63118
2014-09-25 07:02:44.710	58754	56133	61578	63135
2014-09-25 07:02:44.714	58766	56126	61617	63128
2014-09-25 07:02:44.720	58739	56073	61657	63106
2014-09-25 07:02:44.724	58737	56076	61641	63071
2014-09-25 07:02:44.730	58768	56090	61610	63028
2014-09-25 07:02:44.734	58779	56091	61573	63029
2014-09-25 07:02:44.740	58759	56077	61574	63035
2014-09-25 07:02:44.744	58738	56077	61602	63041
2014-09-25 07:02:44.750	58750	56109	61578	63071
2014-09-25 07:02:44.755	58762	56093	61562	63095
2014-09-25 07:02:44.759	58770	56090	61571	63138
2014-09-25 07:02:44.765	58778	56102	61600	63158
2014-09-25 07:02:44.769	58754	56094	61643	63134
2014-09-25 07:02:44.775	58757	56092	61623	63124
2014-09-25 07:02:44.779	58776	56092	61590	63134
2014-09-25 07:02:44.785	58768	56112	61569	63156
2014-09-25 07:02:44.789	58757	56118	61555	63138
2014-09-25 07:02:44.795	58752	56114	61586	63112
2014-09-25 07:02:44.799	58767	56109	61599	63105
2014-09-25 07:02:44.805	58758	56111	61593	63077
2014-09-25 07:02:44.809	58763	56119	61589	63059
2014-09-25 07:02:44.815	58780	56122	61595	63051
2014-09-25 07:02:44.819	58732	56109	61627	63038
2014-09-25 07:02:44.825	58739	56096	61627	63027
2014-09-25 07:02:44.829	58770	56105	61583	63061
2014-09-25 07:02:44.835	58772	56118	61549	63092
2014-09-25 07:02:44.839	58767	56117	61578	63065
2014-09-25 07:02:44.845	58726	56098	61632	63065
2014-09-25 07:02:44.849	58746	56109	61623	63081
2014-09-25 07:02:44.855	58773	56120	61599	63103
2014-09-25 07:02:44.859	58759	56119	61608	63142
2014-09-25 07:02:44.865	58760	56112	61588	63159
2014-09-25 07:02:44.869	58737	56104	61597	63138
2014-09-25 07:02:44.875	58736	56115	61635	63095
2014-09-25 07:02:44.880	58766	56119	61616	63089
2014-09-25 07:02:44.884	58766	56112	61608	63085
2014-09-25 07:02:44.890	58755	56087	61595	63079
2014-09-25 07:02:44.894	58747	56104	61602	63072
2014-09-25 07:02:44.900	58756	56098	61627	63048
2014-09-25 07:02:44.904	58773	56085	61614	63077
2014-09-25 07:02:44.910	58757	56104	61630	63116
2014-09-25 07:02:44.914	58764	56084	61624	63122
2014-09-25 07:02:44.920	58770	56088	61623	63109
2014-09-25 07:02:44.924	58739	56075	61636	63044
2014-09-25 07:02:44.930	58756	56087	61603	62998
2014-09-25 07:02:44.934	58780	56112	61602	63031
2014-09-25 07:02:44.940	58759	56098	61566	63077
2014-09-25 07:02:44.944	58738	56092	61555	63097
2014-09-25 07:02:44.950	58742	56090	61625	63116
2014-09-25 07:02:44.954	58758	56109	61613	63129
2014-09-25 07:02:44.960	58781	56100	61583	63147
2014-09-25 07:02:44.964	58767	56094	61589	63183
2014-09-25 07:02:44.970	58745	56098	61582	63174
2014-09-25 07:02:44.974	58761	56104	61589	63105
2014-09-25 07:02:44.980	58753	56097	61592	63058
2014-09-25 07:02:44.984	58761	56091	61580	63065
2014-09-25 07:02:44.990	58758	56116	61561	63087
2014-09-25 07:02:44.994	58729	56110	61569	63086
2014-09-25 07:02:45.000	58742	56115	61602	63073
2014-09-25 07:02:45.005	58745	56114	61583	63080
2014-09-25 07:02:45.009	58750	56111	61562	63088
2014-09-25 07:02:45.015	58747	56096	61562	63078
2014-09-25 07:02:45.019	58746	56082	61577	63042
2014-09-25 07:02:45.025	58761	56109	61615	62980
2014-09-25 07:02:45.029	58747	56100	61585	62947
2014-09-25 07:02:45.035	58747	56106	61548	63007
2014-09-25 07:02:45.039	58751	56115	61539	63074
2014-09-25 07:02:45.045	58742	56106	61539	63090
2014-09-25 07:02:45.049	58737	56090	61577	63131
2014-09-25 07:02:45.055	58731	56090	61573	63137
2014-09-25 07:02:45.059	58739	56096	61578	63138
2014-09-25 07:02:45.065	58755	56085	61591	63181
2014-09-25 07:02:45.069	58756	56088	61580	63186
2014-09-25 07:02:45.075	58742	56076	61614	63178
2014-09-25 07:02:45.079	58731	56097	61616	63153
2014-09-25 07:02:45.085	58736	56098	61616	63108
2014-09-25 07:02:45.089	58759	56102	61638	63060
2014-09-25 07:02:45.095	58763	56114	61627	63004
2014-09-25 07:02:45.099	58746	56102	61640	62981
2014-09-25 07:02:45.105	58746	56108	61630	62964
2014-09-25 07:02:45.109	58744	56085	61600	62978
2014-09-25 07:02:45.115	58756	56087	61605	63033
2014-09-25 07:02:45.119	58769	56093	61600	63067
2014-09-25 07:02:45.125	58752	56112	61600	63089
2014-09-25 07:02:45.130	58751	56128	61611	63055
2014-09-25 07:02:45.134	58752	56112	61620	63038
2014-09-25 07:02:45.140	58746	56119	61607	63081
2014-09-25 07:02:45.144	58757	56122	61570	63112
2014-09-25 07:02:45.150	58742	56107	61579	63171
2014-09-25 07:02:45.154	58724	56094	61594	63181
2014-09-25 07:02:45.160	58739	56097	61566	63176
2014-09-25 07:02:45.164	58742	56087	61560	63191
2014-09-25 07:02:45.170	58737	56100	61564	63146
2014-09-25 07:02:45.174	58726	56092	61570	63089
2014-09-25 07:02:45.180	58728	56085	61583	63010
2014-09-25 07:02:45.184	58739	56099	61582	62971
2014-09-25 07:02:45.190	58733	56090	61565	63007
2014-09-25 07:02:45.194	58731	56114	61516	63033
2014-09-25 07:02:45.200	58734	56096	61533	63040
2014-09-25 07:02:45.204	58739	56098	61587	63038
2014-09-25 07:02:45.210	58737	56106	61570	63061
2014-09-25 07:02:45.214	58741	56086	61589	63092
2014-09-25 07:02:45.220	58755	56098	61592	63104
2014-09-25 07:02:45.224	58740	56093	61563	63093
2014-09-25 07:02:45.230	58743	56097	61590	63069
2014-09-25 07:02:45.234	58749	56101	61597	63076
2014-09-25 07:02:45.240	58742	56097	61607	63108
2014-09-25 07:02:45.244	58764	56090	61604	63121
2014-09-25 07:02:45.250	58747	56097	61590	63107
2014-09-25 07:02:45.255	58721	56099	61617	63102
2014-09-25 07:02:45.259	58728	56081	61595	63068
2014-09-25 07:02:45.265	58735	56089	61568	63048
2014-09-25 07:02:45.269	58755	56107	61564	63106
2014-09-25 07:02:45.275	58753	56106	61567	63097
2014-09-25 07:02:45.279	58730	56098	61587	63051
2014-09-25 07:02:45.285	58735	56108	61579	63035
2014-09-25 07:02:45.289	58743	56107	61569	63033
2014-09-25 07:02:45.295	58743	56116	61540	63076
2014-09-25 07:02:45.299	58752	56110	61528	63071
2014-09-25 07:02:45.305	58741	56102	61575	63062
2014-09-25 07:02:45.309	58718	56103	61584	63059
2014-09-25 07:02:45.315	58732	56100	61584	63041
2014-09-25 07:02:45.319	58749	56109	61577	63047
2014-09-25 07:02:45.325	58742	56086	61559	63043
2014-09-25 07:02:45.329	58729	56097	61581	63054
2014-09-25 07:02:45.335	58737	56101	61585	63040
2014-09-25 07:02:45.339	58746	56100	61566	63044
2014-09-25 07:02:45.345	58736	56116	61549	63093
2014-09-25 07:02:45.349	58740	56086	61550	63083
2014-09-25 07:02:45.355	58734	56059	61587	63089
2014-09-25 07:02:45.359	58720	56073	61582	63113
2014-09-25 07:02:45.365	58728	56102	61560	63110
2014-09-25 07:02:45.369	58737	56085	61567	63145
2014-09-25 07:02:45.375	58737	56092	61551	63142
2014-09-25 07:02:45.380	58735	56107	61563	63101
2014-09-25 07:02:45.384	58735	56085	61594	63074
2014-09-25 07:02:45.390	58731	56091	61592	63060
2014-09-25 07:02:45.394	58728	56110	61560	63083
2014-09-25 07:02:45.400	58733	56109	61525	63056
2014-09-25 07:02:45.404	58737	56087	61551	63022
2014-09-25 07:02:45.410	58724	56098	61571	63034
2014-09-25 07:02:45.414	58721	56105	61557	63031
2014-09-25 07:02:45.420	58736	56093	61548	63035
2014-09-25 07:02:45.424	58735	56089	61531	63034
2014-09-25 07:02:45.430	58728	56088	61556	63024
2014-09-25 07:02:45.434	58723	56086	61580	62997
2014-09-25 07:02:45.440	58725	56083	61583	63013
2014-09-25 07:02:45.444	58727	56093	61555	63090
2014-09-25 07:02:45.450	58730	56097	61507	63117
2014-09-25 07:02:45.454	58738	56103	61548	63095
2014-09-25 07:02:45.460	58730	56090	61596	63078
2014-09-25 07:02:45.464	58723	56094	61606	63089
2014-09-25 07:02:45.470	58723	56109	61592	63123
2014-09-25 07:02:45.474	58721	56092	61540	63179
2014-09-25 07:02:45.480	58724	56092	61569	63192
2014-09-25 07:02:45.484	58728	56109	61614	63114
2014-09-25 07:02:45.490	58731	56101	61609	63049
2014-09-25 07:02:45.494	58721	56083	61594	63029
2014-09-25 07:02:45.500	58719	56100	61537	63002
2014-09-25 07:02:45.505	58746	56082	61531	62963
2014-09-25 07:02:45.509	58730	56072	61563	62948
2014-09-25 07:02:45.515	58705	56101	61561	62974
2014-09-25 07:02:45.519	58727	56088	61563	63008
2014-09-25 07:02:45.525	58724	56099	61535	63040
2014-09-25 07:02:45.529	58715	56093	61536	63065
2014-09-25 07:02:45.535	58725	56084	61581	63074
2014-09-25 07:02:45.539	58720	56097	61596	63076
2014-09-25 07:02:45.545	58726	56082	61570	63103
2014-09-25 07:02:45.549	58729	56084	61519	63166
2014-09-25 07:02:45.555	58728	56083	61530	63160
2014-09-25 07:02:45.559	58736	56068	61565	63128
2014-09-25 07:02:45.565	58733	56082	61575	63118
2014-09-25 07:02:45.569	58733	56106	61585	63070
2014-09-25 07:02:45.575	58742	56095	61535	63078
2014-09-25 07:02:45.579	58748	56102	61518	63082
2014-09-25 07:02:45.585	58745	56109	61556	63036
2014-09-25 07:02:45.589	58725	56091	61552	63011
2014-09-25 07:02:45.595	58720	56099	61545	63005
2014-09-25 07:02:45.599	58733	56093	61522	63018
2014-09-25 07:02:45.605	58737	56080	61521	62981
2014-09-25 07:02:45.609	58715	56076	61576	62947
2014-09-25 07:02:45.615	58704	56087	61595	62977
2014-09-25 07:02:45.619	58723	56097	61593	63010
2014-09-25 07:02:45.625	58736	56099	61580	63059
2014-09-25 07:02:45.630	58737	56098	61577	63093
2014-09-25 07:02:45.634	58737	56098	61606	63116
2014-09-25 07:02:45.640	58731	56096	61624	63134
2014-09-25 07:02:45.644	58730	56086	61600	63132
2014-09-25 07:02:45.650	58727	56089	61542	63165
2014-09-25 07:02:45.654	58726	56090	61504	63151
2014-09-25 07:02:45.660	58723	56107	61502	63085
2014-09-25 07:02:45.664	58705	56097	61529	63082
2014-09-25 07:02:45.670	58713	56094	61536	63060
2014-09-25 07:02:45.674	58724	56113	61503	63027
2014-09-25 07:02:45.680	58720	56109	61504	63034
2014-09-25 07:02:45.684	58723	56112	61530	63018
2014-09-25 07:02:45.690	58722	56090	61551	63018
2014-09-25 07:02:45.694	58715	56087	61551	63008
2014-09-25 07:02:45.700	58716	56088	61524	63024
2014-09-25 07:02:45.704	58721	56094	61519	63045
2014-09-25 07:02:45.710	58727	56099	61565	63014
2014-09-25 07:02:45.714	58721	56094	61620	63035
2014-09-25 07:02:45.720	58720	56107	61622	63045
2014-09-25 07:02:45.724	58744	56102	61578	63069
2014-09-25 07:02:45.730	58723	56107	61547	63122
2014-09-25 07:02:45.734	58707	56095	61544	63098
2014-09-25 07:02:45.740	58743	56096	61553	63095
2014-09-25 07:02:45.744	58737	56092	61565	63071
2014-09-25 07:02:45.750	58720	56092	61557	63031
2014-09-25 07:02:45.755	58731	56098	61521	63060
2014-09-25 07:02:45.759	58746	56071	61518	63077
2014-09-25 07:02:45.765	58745	56091	61556	63097
2014-09-25 07:02:45.769	58724	56110	61555	63085
2014-09-25 07:02:45.775	58722	56105	61536	63071
2014-09-25 07:02:45.779	58728	56089	61526	63101
2014-09-25 07:02:45.785	58718	56100	61541	63103
2014-09-25 07:02:45.789	58722	56098	61581	63103
2014-09-25 07:02:45.795	58731	56073	61599	63073
2014-09-25 07:02:45.799	58719	56086	61590	63029
2014-09-25 07:02:45.805	58725	56091	61567	63037
2014-09-25 07:02:45.809	58741	56092	61558	63026
2014-09-25 07:02:45.815	58723	56082	61588	63001
2014-09-25 07:02:45.819	58711	56096	61603	62999
2014-09-25 07:02:45.825	58727	56104	61549	63000
2014-09-25 07:02:45.829	58730	56095	61503	63021
2014-09-25 07:02:45.835	58732	56094	61520	63076
2014-09-25 07:02:45.839	58738	56092	61551	63110
2014-09-25 07:02:45.845	58730	56096	61561	63104
2014-09-25 07:02:45.849	58722	56081	61559	63092
2014-09-25 07:02:45.855	58723	56089	61537	63081
2014-09-25 07:02:45.859	58736	56097	61522	63056
2014-09-25 07:02:45.865	58737	56099	61566	63025
2014-09-25 07:02:45.869	58725	56097	61588	63026
2014-09-25 07:02:45.875	58729	56096	61559	63035
2014-09-25 07:02:45.880	58733	56098	61529	63072
2014-09-25 07:02:45.884	58728	56089	61518	63132
2014-09-25 07:02:45.890	58725	56098	61551	63148
2014-09-25 07:02:45.894	58733	56098	61561	63130
2014-09-25 07:02:45.900	58726	56094	61535	63064
2014-09-25 07:02:45.904	58710	56086	61527	63017
2014-09-25 07:02:45.910	58722	56102	61493	63052
2014-09-25 07:02:45.914	58734	56103	61507	63068
2014-09-25 07:02:45.920	58735	56084	61574	63032
2014-09-25 07:02:45.924	58729	56091	61590	62998
2014-09-25 07:02:45.930	58715	56094	61570	62995
2014-09-25 07:02:45.934	58730	56099	61549	63019
2014-09-25 07:02:45.940	58741	56090	61586	63061
2014-09-25 07:02:45.944	58715	56093	61616	63090
2014-09-25 07:02:45.950	58706	56076	61587	63090
2014-09-25 07:02:45.954	58730	56072	61574	63103
2014-09-25 07:02:45.960	58737	56093	61547	63112
2014-09-25 07:02:45.964	58724	56091	61547	63086
2014-09-25 07:02:45.970	58717	56093	61600	63069
2014-09-25 07:02:45.974	58714	56080	61599	63063
2014-09-25 07:02:45.980	58720	56096	61557	63033
2014-09-25 07:02:45.984	58728	56101	61540	63032
2014-09-25 07:02:45.990	58730	56080	61561	63074
2014-09-25 07:02:45.994	58733	56087	61595	63086
2014-09-25 07:02:46.000	58735	56093	61584	63053
2014-09-25 07:02:46.005	58725	56084	61537	63034
2014-09-25 07:02:46.009	58728	56077	61510	63055
2014-09-25 07:02:46.015	58745	56086	61515	63064
2014-09-25 07:02:46.019	58731	56094	61571	63057
2014-09-25 07:02:46.025	58720	56093	61590	63056
2014-09-25 07:02:46.029	58734	56079	61551	63040
2014-09-25 07:02:46.035	58739	56086	61551	63032
2014-09-25 07:02:46.039	58745	56099	61556	63062
2014-09-25 07:02:46.045	58748	56090	61555	63082
2014-09-25 07:02:46.049	58744	56092	61535	63079
2014-09-25 07:02:46.055	58732	56089	61506	63081
2014-09-25 07:02:46.059	58735	56072	61499	63089
2014-09-25 07:02:46.065	58751	56100	61497	63088
2014-09-25 07:02:46.069	58727	56127	61553	63066
2014-09-25 07:02:46.075	58717	56092	61585	63043
2014-09-25 07:02:46.079	58738	56097	61543	63014
2014-09-25 07:02:46.085	58747	56112	61557	63025
2014-09-25 07:02:46.089	58750	56091	61601	63081
2014-09-25 07:02:46.095	58727	56084	61624	63096
2014-09-25 07:02:46.099	58728	56093	61614	63076
2014-09-25 07:02:46.105	58745	56093	61585	63033
2014-09-25 07:02:46.109	58741	56080	61577	63022
2014-09-25 07:02:46.115	58749	56122	61552	63053
2014-09-25 07:02:46.119	58738	56119	61563	63051
2014-09-25 07:02:46.125	58729	56088	61585	63060
2014-09-25 07:02:46.130	58731	56091	61528	63063
2014-09-25 07:02:46.134	58735	56081	61492	63064
2014-09-25 07:02:46.140	58749	56090	61514	63100
2014-09-25 07:02:46.144	58733	56084	61561	63100
2014-09-25 07:02:46.150	58737	56090	61572	63076
2014-09-25 07:02:46.154	58750	56102	61525	63051
2014-09-25 07:02:46.160	58737	56100	61514	63060
2014-09-25 07:02:46.164	58754	56096	61517	63119
2014-09-25 07:02:46.170	58750	56103	61552	63133
2014-09-25 07:02:46.174	58737	56105	61620	63097
2014-09-25 07:02:46.180	58744	56074	61612	63035
2014-09-25 07:02:46.184	58740	56086	61589	63000
2014-09-25 07:02:46.190	58753	56093	61596	63034
2014-09-25 07:02:46.194	58744	56071	61612	63080
2014-09-25 07:02:46.200	58745	56077	61621	63107
2014-09-25 07:02:46.204	58755	56101	61576	63101
2014-09-25 07:02:46.210	58730	56096	61534	63073
2014-09-25 07:02:46.214	58748	56083	61532	63079
2014-09-25 07:02:46.220	58758	56092	61568	63085
2014-09-25 07:02:46.224	58738	56089	61617	63052
2014-09-25 07:02:46.230	58740	56082	61597	63033
2014-09-25 07:02:46.234	58732	56071	61550	63011
2014-09-25 07:02:46.240	58747	56089	61554	62989
2014-09-25 07:02:46.244	58749	56084	61585	62999
2014-09-25 07:02:46.250	58736	56081	61596	62995
2014-09-25 07:02:46.255	58743	56094	61565	63004
2014-09-25 07:02:46.259	58729	56087	61534	63032
2014-09-25 07:02:46.265	58737	56101	61521	63077
2014-09-25 07:02:46.269	58747	56086	61533	63162
2014-09-25 07:02:46.275	58723	56092	61601	63200
2014-09-25 07:02:46.279	58710	56098	61620	63172
2014-09-25 07:02:46.285	58731	56088	61582	63132
2014-09-25 07:02:46.289	58755	56098	61584	63103
2014-09-25 07:02:46.295	58737	56096	61614	63092
2014-09-25 07:02:46.299	58730	56099	61637	63096
2014-09-25 07:02:46.305	58748	56092	61617	63100
2014-09-25 07:02:46.309	58737	56090	61569	63089
2014-09-25 07:02:46.315	58742	56084	61532	63087
2014-09-25 07:02:46.319	58753	56082	61521	63092
2014-09-25 07:02:46.325	58738	56086	61550	63061
2014-09-25 07:02:46.329	58728	56076	61567	63004
2014-09-25 07:02:46.335	58737	56086	61549	62950
2014-09-25 07:02:46.339	58747	56100	61524	62942
2014-09-25 07:02:46.345	58743	56085	61548	62991
2014-09-25 07:02:46.349	58742	56079	61596	63035
2014-09-25 07:02:46.355	58744	56085	61587	63042
2014-09-25 07:02:46.359	58740	56081	61573	63055
2014-09-25 07:02:46.365	58736	56086	61563	63077
2014-09-25 07:02:46.369	58738	56090	61558	63104
2014-09-25 07:02:46.375	58740	56100	61601	63170
2014-09-25 07:02:46.380	58738	56101	61617	63189
2014-09-25 07:02:46.384	58738	56113	61592	63147
2014-09-25 07:02:46.390	58740	56105	61578	63121
2014-09-25 07:02:46.394	58746	56089	61576	63100
2014-09-25 07:02:46.400	58745	56110	61597	63093
2014-09-25 07:02:46.404	58754	56107	61602	63069
2014-09-25 07:02:46.410	58740	56106	61570	63057
2014-09-25 07:02:46.414	58732	56095	61522	63059
2014-09-25 07:02:46.420	58772	56103	61501	63053
2014-09-25 07:02:46.424	58753	56106	61528	63071
2014-09-25 07:02:46.430	58736	56087	61555	63054
2014-09-25 07:02:46.434	58759	56086	61565	63029
2014-09-25 07:02:46.440	58738	56082	61555	63013
2014-09-25 07:02:46.444	58750	56093	61564	63006
2014-09-25 07:02:46.450	58750	56082	61612	63042
2014-09-25 07:02:46.454	58730	56092	61605	63069
2014-09-25 07:02:46.460	58748	56101	61559	63087
2014-09-25 07:02:46.464	58737	56095	61528	63087
2014-09-25 07:02:46.470	58744	56102	61530	63086
2014-09-25 07:02:46.474	58756	56079	61575	63131
2014-09-25 07:02:46.480	58737	56091	61610	63129
2014-09-25 07:02:46.484	58738	56093	61594	63093
2014-09-25 07:02:46.490	58746	56085	61566	63077
2014-09-25 07:02:46.494	58749	56094	61565	63053
2014-09-25 07:02:46.500	58740	56104	61599	63079
2014-09-25 07:02:46.505	58744	56114	61631	63120
2014-09-25 07:02:46.509	58754	56106	61607	63099
2014-09-25 07:02:46.515	58735	56106	61578	63065
2014-09-25 07:02:46.519	58737	56101	61569	63054
2014-09-25 07:02:46.525	58755	56102	61561	63092
2014-09-25 07:02:46.529	58739	56100	61580	63123
2014-09-25 07:02:46.535	58725	56103	61591	63095
2014-09-25 07:02:46.539	58742	56095	61552	63040
2014-09-25 07:02:46.545	58759	56098	61525	62985
2014-09-25 07:02:46.549	58748	56115	61548	62995
2014-09-25 07:02:46.555	58730	56088	61574	63040
2014-09-25 07:02:46.559	58752	56095	61569	63051
2014-09-25 07:02:46.565	58755	56101	61549	63069
2014-09-25 07:02:46.569	58736	56089	61531	63088
2014-09-25 07:02:46.575	58764	56098	61542	63106
2014-09-25 07:02:46.579	58763	56103	61591	63141
2014-09-25 07:02:46.585	58737	56103	61617	63133
2014-09-25 07:02:46.589	58732	56099	61609	63091
2014-09-25 07:02:46.595	58736	56111	61617	63067
2014-09-25 07:02:46.599	58742	56122	61620	63071
2014-09-25 07:02:46.605	58755	56121	61615	63118
2014-09-25 07:02:46.609	58766	56118	61597	63134
2014-09-25 07:02:46.615	58746	56140	61566	63091
2014-09-25 07:02:46.619	58744	56114	61566	63060
2014-09-25 07:02:46.625	58761	56100	61569	63041
2014-09-25 07:02:46.630	58756	56128	61577	63059
2014-09-25 07:02:46.634	58749	56096	61595	63062
2014-09-25 07:02:46.640	58749	56087	61590	63013
2014-09-25 07:02:46.644	58750	56090	61596	62991
2014-09-25 07:02:46.650	58756	56109	61597	62998
2014-09-25 07:02:46.654	58756	56110	61605	63044
2014-09-25 07:02:46.660	58743	56090	61602	63074
2014-09-25 07:02:46.664	58749	56096	61558	63058
2014-09-25 07:02:46.670	58756	56103	61542	63061
2014-09-25 07:02:46.674	58756	56107	61524	63073
2014-09-25 07:02:46.680	58770	56087	61527	63123
2014-09-25 07:02:46.684	58755	56106	61570	63161
2014-09-25 07:02:46.690	58730	56111	61576	63133
2014-09-25 07:02:46.694	58734	56113	61568	63116
2014-09-25 07:02:46.700	58750	56126	61561	63091
2014-09-25 07:02:46.704	58762	56125	61574	63091
2014-09-25 07:02:46.710	58746	56134	61587	63140
2014-09-25 07:02:46.714	58749	56116	61543	63119
2014-09-25 07:02:46.720	58750	56113	61527	63066
2014-09-25 07:02:46.724	58741	56112	61538	63048
2014-09-25 07:02:46.730	58771	56120	61570	63031
2014-09-25 07:02:46.734	58763	56114	61618	63038
2014-09-25 07:02:46.740	58742	56104	61612	63024
2014-09-25 07:02:46.744	58752	56117	61605	63002
2014-09-25 07:02:46.750	58760	56122	61596	63022
2014-09-25 07:02:46.755	58768	56125	61602	63068
2014-09-25 07:02:46.759	58753	56115	61648	63120
2014-09-25 07:02:46.765	58755	56121	61627	63118
2014-09-25 07:02:46.769	58755	56122	61586	63076
2014-09-25 07:02:46.775	58753	56102	61559	63065
2014-09-25 07:02:46.779	58773	56102	61546	63103
2014-09-25 07:02:46.785	58752	56113	61593	63152
2014-09-25 07:02:46.789	58737	56097	61601	63144
2014-09-25 07:02:46.795	58755	56108	61594	63093
2014-09-25 07:02:46.799	58762	56125	61603	63053
2014-09-25 07:02:46.805	58744	56122	61607	63032
2014-09-25 07:02:46.809	58747	56129	61631	63061
2014-09-25 07:02:46.815	58771	56108	61613	63113
2014-09-25 07:02:46.819	58750	56124	61578	63098
2014-09-25 07:02:46.825	58748	56116	61561	63084
2014-09-25 07:02:46.829	58756	56113	61563	63091
2014-09-25 07:02:46.835	58750	56130	61593	63096
2014-09-25 07:02:46.839	58751	56110	61603	63084
2014-09-25 07:02:46.845	58736	56120	61607	63026
2014-09-25 07:02:46.849	58748	56115	61598	62986
2014-09-25 07:02:46.855	58759	56136	61588	62987
2014-09-25 07:02:46.859	58747	56132	61602	63046
2014-09-25 07:02:46.865	58754	56109	61588	63104
2014-09-25 07:02:46.869	58754	56113	61565	63118
2014-09-25 07:02:46.875	58740	56116	61558	63135
2014-09-25 07:02:46.880	58749	56109	61568	63127
2014-09-25 07:02:46.884	58769	56094	61597	63159
2014-09-25 07:02:46.890	58761	56116	61603	63173
2014-09-25 07:02:46.894	58756	56102	61598	63113
2014-09-25 07:02:46.900	58753	56101	61603	63093
2014-09-25 07:02:46.904	58758	56127	61618	63081
2014-09-25 07:02:46.910	58758	56132	61641	63087
2014-09-25 07:02:46.914	58762	56120	61636	63107
2014-09-25 07:02:46.920	58782	56119	61603	63086
2014-09-25 07:02:46.924	58748	56128	61575	63054
2014-09-25 07:02:46.930	58738	56113	61556	63040
2014-09-25 07:02:46.934	58767	56126	61557	63030
2014-09-25 07:02:46.940	58767	56124	61582	63010
2014-09-25 07:02:46.944	58748	56132	61599	62981
2014-09-25 07:02:46.950	58736	56119	61584	62962
2014-09-25 07:02:46.954	58766	56106	61570	63017
2014-09-25 07:02:46.960	58762	56133	61596	63102
2014-09-25 07:02:46.964	58754	56115	61611	63166
2014-09-25 07:02:46.970	58779	56104	61574	63208
2014-09-25 07:02:46.974	58763	56104	61553	63169
2014-09-25 07:02:46.980	58762	56118	61560	63130
2014-09-25 07:02:46.984	58783	56117	61571	63147
2014-09-25 07:02:46.990	58779	56117	61594	63153
2014-09-25 07:02:46.994	58761	56116	61604	63149
2014-09-25 07:02:47.000	58758	56113	61591	63129
2014-09-25 07:02:47.005	58770	56130	61576	63109
2014-09-25 07:02:47.009	58766	56120	61572	63089
2014-09-25 07:02:47.015	58770	56114	61586	63055
2014-09-25 07:02:47.019	58773	56117	61573	63038
2014-09-25 07:02:47.025	58767	56126	61540	63032
2014-09-25 07:02:47.029	58772	56096	61532	63024
2014-09-25 07:02:47.035	58773	56100	61540	63023
2014-09-25 07:02:47.039	58773	56122	61563	63053
2014-09-25 07:02:47.045	58763	56110	61595	63084
2014-09-25 07:02:47.049	58751	56135	61599	63071
2014-09-25 07:02:47.055	58769	56132	61601	63050
2014-09-25 07:02:47.059	58772	56133	61627	63057
2014-09-25 07:02:47.065	58766	56117	61654	63116
2014-09-25 07:02:47.069	58779	56111	61649	63177
2014-09-25 07:02:47.075	58774	56133	61612	63179
2014-09-25 07:02:47.079	58757	56127	61562	63171
2014-09-25 07:02:47.085	58756	56129	61562	63155
2014-09-25 07:02:47.089	58758	56138	61608	63136
2014-09-25 07:02:47.095	58761	56146	61615	63115
2014-09-25 07:02:47.099	58757	56125	61615	63076
2014-09-25 07:02:47.105	58751	56124	61600	63037
2014-09-25 07:02:47.109	58763	56125	61578	63025
2014-09-25 07:02:47.115	58773	56121	61597	63047
2014-09-25 07:02:47.119	58772	56123	61596	63074
2014-09-25 07:02:47.125	58770	56120	61588	63087
2014-09-25 07:02:47.130	58764	56128	61577	63068
2014-09-25 07:02:47.134	58759	56107	61561	63053
2014-09-25 07:02:47.140	58768	56113	61587	63107
2014-09-25 07:02:47.144	58781	56116	61607	63143
2014-09-25 07:02:47.150	58784	56116	61603	63105
2014-09-25 07:02:47.154	58779	56120	61614	63058
2014-09-25 07:02:47.160	58779	56121	61619	63050
2014-09-25 07:02:47.164	58785	56120	61632	63056
2014-09-25 07:02:47.170	58790	56097	61651	63096
2014-09-25 07:02:47.174	58785	56110	61617	63171
2014-09-25 07:02:47.180	58772	56112	61563	63172
2014-09-25 07:02:47.184	58775	56109	61539	63174
2014-09-25 07:02:47.190	58783	56112	61555	63214
2014-09-25 07:02:47.194	58782	56132	61598	63188
2014-09-25 07:02:47.200	58770	56134	61605	63133
2014-09-25 07:02:47.204	58775	56125	61582	63080
2014-09-25 07:02:47.210	58782	56139	61568	63041
2014-09-25 07:02:47.214	58770	56118	61594	63025
2014-09-25 07:02:47.220	58782	56111	61641	63028
2014-09-25 07:02:47.224	58776	56109	61634	63026
2014-09-25 07:02:47.230	58767	56129	61614	62990
2014-09-25 07:02:47.234	58776	56119	61586	62996
2014-09-25 07:02:47.240	58765	56117	61579	63042
2014-09-25 07:02:47.244	58783	56145	61613	63099
2014-09-25 07:02:47.250	58781	56128	61624	63159
2014-09-25 07:02:47.255	58755	56134	61629	63150
2014-09-25 07:02:47.259	58761	56125	61596	63130
2014-09-25 07:02:47.265	58770	56143	61590	63126
2014-09-25 07:02:47.269	58778	56130	61631	63145
2014-09-25 07:02:47.275	58788	56113	61626	63197
2014-09-25 07:02:47.279	58778	56138	61602	63172
2014-09-25 07:02:47.285	58755	56130	61565	63144
2014-09-25 07:02:47.289	58773	56142	61564	63164
2014-09-25 07:02:47.295	58797	56125	61588	63152
2014-09-25 07:02:47.299	58771	56126	61614	63125
2014-09-25 07:02:47.305	58760	56142	61641	63064
2014-09-25 07:02:47.309	58772	56143	61602	63008
2014-09-25 07:02:47.315	58766	56128	61588	63009
2014-09-25 07:02:47.319	58776	56112	61615	63023
2014-09-25 07:02:47.325	58783	56133	61609	63052
2014-09-25 07:02:47.329	58786	56131	61586	63041
2014-09-25 07:02:47.335	58781	56127	61556	62991
2014-09-25 07:02:47.339	58761	56116	61557	63006
2014-09-25 07:02:47.345	58779	56129	61582	63046
2014-09-25 07:02:47.349	58801	56132	61620	63075
2014-09-25 07:02:47.355	58781	56127	61646	63108
2014-09-25 07:02:47.359	58775	56126	61600	63140
2014-09-25 07:02:47.365	58776	56120	61573	63209
2014-09-25 07:02:47.369	58778	56133	61615	63259
2014-09-25 07:02:47.375	58792	56116	61635	63264
2014-09-25 07:02:47.380	58788	56114	61635	63236
2014-09-25 07:02:47.384	58772	56126	61630	63178
2014-09-25 07:02:47.390	58768	56130	61600	63136
2014-09-25 07:02:47.394	58780	56120	61603	63084
2014-09-25 07:02:47.400	58786	56122	61625	63069
2014-09-25 07:02:47.404	58769	56128	61613	63074
2014-09-25 07:02:47.410	58767	56127	61599	63025
2014-09-25 07:02:47.414	58775	56126	61578	63026
2014-09-25 07:02:47.420	58773	56114	61612	63045
2014-09-25 07:02:47.424	58778	56127	61666	63023
2014-09-25 07:02:47.430	58787	56131	61643	63014
2014-09-25 07:02:47.434	58787	56138	61601	63013
2014-09-25 07:02:47.440	58777	56134	61559	63030
2014-09-25 07:02:47.444	58787	56153	61557	63070
2014-09-25 07:02:47.450	58785	56148	61616	63132
2014-09-25 07:02:47.454	58774	56121	61637	63172
2014-09-25 07:02:47.460	58785	56142	61614	63183
2014-09-25 07:02:47.464	58776	56133	61597	63189
2014-09-25 07:02:47.470	58793	56125	61617	63164
2014-09-25 07:02:47.474	58801	56112	61658	63147
2014-09-25 07:02:47.480	58776	56127	61660	63150
2014-09-25 07:02:47.484	58787	56130	61621	63119
2014-09-25 07:02:47.490	58781	56111	61585	63080
2014-09-25 07:02:47.494	58775	56121	61576	63105
2014-09-25 07:02:47.500	58786	56118	61596	63143
2014-09-25 07:02:47.505	58773	56130	61620	63141
2014-09-25 07:02:47.509	58771	56115	61597	63107
2014-09-25 07:02:47.515	58776	56125	61581	63042
2014-09-25 07:02:47.519	58787	56129	61602	63016
2014-09-25 07:02:47.525	58785	56117	61609	63028
2014-09-25 07:02:47.529	58770	56141	61632	63025
2014-09-25 07:02:47.535	58777	56138	61621	63032
2014-09-25 07:02:47.539	58774	56140	61569	63083
2014-09-25 07:02:47.545	58779	56145	61578	63132
2014-09-25 07:02:47.549	58790	56140	61601	63144
2014-09-25 07:02:47.555	58775	56143	61605	63155
2014-09-25 07:02:47.559	58776	56147	61602	63145
2014-09-25 07:02:47.565	58777	56118	61596	63125
2014-09-25 07:02:47.569	58774	56117	61604	63116
2014-09-25 07:02:47.575	58774	56143	61622	63130
2014-09-25 07:02:47.579	58778	56118	61659	63161
2014-09-25 07:02:47.585	58786	56118	61641	63170
2014-09-25 07:02:47.589	58775	56130	61599	63155
2014-09-25 07:02:47.595	58775	56105	61606	63121
2014-09-25 07:02:47.599	58784	56109	61599	63072
2014-09-25 07:02:47.605	58792	56124	61619	63050
2014-09-25 07:02:47.609	58784	56100	61640	63058
2014-09-25 07:02:47.615	58766	56110	61596	63066
2014-09-25 07:02:47.619	58781	56132	61588	63094
2014-09-25 07:02:47.625	58786	56115	61625	63089
2014-09-25 07:02:47.630	58785	56139	61640	63047
2014-09-25 07:02:47.634	58800	56153	61631	63025
2014-09-25 07:02:47.640	58784	56145	61595	63009
2014-09-25 07:02:47.644	58771	56146	61567	63044
2014-09-25 07:02:47.650	58802	56144	61570	63132
2014-09-25 07:02:47.654	58806	56150	61585	63215
2014-09-25 07:02:47.660	58771	56152	61602	63258
2014-09-25 07:02:47.664	58768	56154	61590	63237
2014-09-25 07:02:47.670	58781	56141	61579	63212
2014-09-25 07:02:47.674	58801	56143	61614	63182
2014-09-25 07:02:47.680	58798	56156	61658	63136
2014-09-25 07:02:47.684	58769	56154	61663	63102
2014-09-25 07:02:47.690	58776	56148	61608	63077
2014-09-25 07:02:47.694	58776	56142	61566	63059
2014-09-25 07:02:47.700	58776	56127	61584	63045
2014-09-25 07:02:47.704	58790	56115	61600	63052
2014-09-25 07:02:47.710	58764	56130	61609	63050
2014-09-25 07:02:47.714	58764	56117	61612	63014
2014-09-25 07:02:47.720	58790	56117	61605	63007
2014-09-25 07:02:47.724	58794	56138	61621	63027
2014-09-25 07:02:47.730	58783	56131	61649	63049
2014-09-25 07:02:47.734	58775	56134	61638	63084
2014-09-25 07:02:47.740	58785	56152	61615	63121
2014-09-25 07:02:47.744	58772	56134	61596	63161
2014-09-25 07:02:47.750	58783	56130	61578	63185
2014-09-25 07:02:47.755	58801	56155	61595	63196
2014-09-25 07:02:47.759	58772	56131	61604	63202
2014-09-25 07:02:47.765	58778	56135	61580	63173
2014-09-25 07:02:47.769	58777	56144	61561	63147
2014-09-25 07:02:47.775	58764	56145	61576	63131
2014-09-25 07:02:47.779	58790	56148	61632	63128
2014-09-25 07:02:47.785	58794	56141	61652	63129
2014-09-25 07:02:47.789	58773	56161	61631	63114
2014-09-25 07:02:47.795	58771	56141	61590	63123
2014-09-25 07:02:47.799	58783	56137	61534	63091
2014-09-25 07:02:47.805	58779	56126	61555	63058
2014-09-25 07:02:47.809	58770	56117	61622	63064
2014-09-25 07:02:47.815	58774	56126	61625	63039
2014-09-25 07:02:47.819	58772	56114	61587	63027
2014-09-25 07:02:47.825	58784	56133	61569	63020
2014-09-25 07:02:47.829	58793	56136	61613	63026
2014-09-25 07:02:47.835	58785	56132	61659	63059
2014-09-25 07:02:47.839	58795	56127	61645	63084
2014-09-25 07:02:47.845	58784	56131	61613	63107
2014-09-25 07:02:47.849	58757	56111	61557	63107
2014-09-25 07:02:47.855	58781	56112	61563	63102
2014-09-25 07:02:47.859	58782	56144	61625	63143
2014-09-25 07:02:47.865	58770	56123	61627	63196
2014-09-25 07:02:47.869	58794	56126	61604	63218
2014-09-25 07:02:47.875	58785	56141	61572	63225
2014-09-25 07:02:47.880	58783	56143	61602	63187
2014-09-25 07:02:47.884	58793	56139	61664	63140
2014-09-25 07:02:47.890	58780	56132	61647	63140
2014-09-25 07:02:47.894	58773	56129	61607	63121
2014-09-25 07:02:47.900	58751	56118	61566	63084
2014-09-25 07:02:47.904	58764	56122	61549	63040
2014-09-25 07:02:47.910	58792	56140	61582	63018
2014-09-25 07:02:47.914	58787	56131	61612	63010
2014-09-25 07:02:47.920	58768	56122	61613	62972
2014-09-25 07:02:47.924	58757	56143	61594	62981
2014-09-25 07:02:47.930	58777	56131	61632	63009
2014-09-25 07:02:47.934	58775	56131	61663	63025
2014-09-25 07:02:47.940	58764	56133	61624	63043
2014-09-25 07:02:47.944	58766	56123	61583	63037
2014-09-25 07:02:47.950	58760	56130	61540	63054
2014-09-25 07:02:47.954	58786	56112	61525	63105
2014-09-25 07:02:47.960	58789	56125	61562	63164
2014-09-25 07:02:47.964	58773	56138	61602	63230
2014-09-25 07:02:47.970	58786	56124	61625	63271
2014-09-25 07:02:47.974	58781	56125	61621	63287
2014-09-25 07:02:47.980	58784	56135	61629	63279
2014-09-25 07:02:47.984	58792	56122	61671	63213
2014-09-25 07:02:47.990	58781	56121	61687	63136
2014-09-25 07:02:47.994	58781	56123	61658	63057
2014-09-25 07:02:48.000	58767	56112	61619	62989
2014-09-25 07:02:48.005	58772	56118	61596	62988
2014-09-25 07:02:48.009	58798	56108	61598	63013
2014-09-25 07:02:48.015	58771	56124	61609	63031
2014-09-25 07:02:48.019	58744	56129	61608	63013
2014-09-25 07:02:48.025	58761	56119	61573	62998
2014-09-25 07:02:48.029	58779	56147	61560	63027
2014-09-25 07:02:48.035	58771	56140	61601	63040
2014-09-25 07:02:48.039	58763	56123	61610	63069
2014-09-25 07:02:48.045	58773	56128	61574	63102
2014-09-25 07:02:48.049	58760	56125	61540	63118
2014-09-25 07:02:48.055	58760	56119	61518	63158
2014-09-25 07:02:48.059	58769	56126	61531	63183
2014-09-25 07:02:48.065	58760	56128	61565	63194
2014-09-25 07:02:48.069	58773	56130	61599	63175
2014-09-25 07:02:48.075	58777	56118	61607	63127
2014-09-25 07:02:48.079	58771	56117	61622	63134
2014-09-25 07:02:48.085	58779	56144	61654	63151
2014-09-25 07:02:48.089	58775	56123	61653	63140
2014-09-25 07:02:48.095	58763	56120	61633	63122
2014-09-25 07:02:48.099	58763	56117	61581	63084
2014-09-25 07:02:48.105	58770	56092	61559	63051
2014-09-25 07:02:48.109	58765	56119	61606	63017
2014-09-25 07:02:48.115	58757	56119	61618	63012
2014-09-25 07:02:48.119	58762	56090	61610	63017
2014-09-25 07:02:48.125	58748	56118	61611	63014
2014-09-25 07:02:48.130	58738	56140	61599	63044
2014-09-25 07:02:48.134	58751	56132	61614	63064
2014-09-25 07:02:48.140	58752	56136	61630	63095
2014-09-25 07:02:48.144	58768	56130	61623	63139
2014-09-25 07:02:48.150	58768	56122	61588	63122
2014-09-25 07:02:48.154	58746	56118	61541	63097
2014-09-25 07:02:48.160	58777	56123	61540	63136
2014-09-25 07:02:48.164	58786	56137	61560	63164
2014-09-25 07:02:48.170	58745	56133	61580	63132
2014-09-25 07:02:48.174	58745	56121	61569	63109
2014-09-25 07:02:48.180	58761	56125	61564	63125
2014-09-25 07:02:48.184	58775	56136	61619	63132
2014-09-25 07:02:48.190	58783	56121	61640	63105
2014-09-25 07:02:48.194	58770	56107	61627	63090
2014-09-25 07:02:48.200	58761	56098	61596	63072
2014-09-25 07:02:48.204	58759	56093	61556	63054
2014-09-25 07:02:48.210	58774	56111	61567	63079
2014-09-25 07:02:48.214	58764	56110	61594	63116
2014-09-25 07:02:48.220	58754	56108	61608	63102
2014-09-25 07:02:48.224	58760	56125	61599	63023
2014-09-25 07:02:48.230	58758	56136	61576	63001
2014-09-25 07:02:48.234	58780	56113	61573	63046
2014-09-25 07:02:48.240	58778	56121	61578	63085
2014-09-25 07:02:48.244	58773	56150	61598	63131
2014-09-25 07:02:48.250	58766	56119	61605	63099
2014-09-25 07:02:48.255	58750	56125	61568	63050
2014-09-25 07:02:48.259	58767	56134	61570	63053
2014-09-25 07:02:48.265	58764	56126	61597	63074
2014-09-25 07:02:48.269	58763	56139	61595	63121
2014-09-25 07:02:48.275	58763	56135	61577	63104
2014-09-25 07:02:48.279	58753	56122	61565	63084
2014-09-25 07:02:48.285	58767	56116	61595	63115
2014-09-25 07:02:48.289	58768	56109	61619	63114
2014-09-25 07:02:48.295	58753	56096	61613	63106
2014-09-25 07:02:48.299	58745	56107	61613	63078
2014-09-25 07:02:48.305	58750	56096	61577	63047
2014-09-25 07:02:48.309	58760	56110	61547	63050
2014-09-25 07:02:48.315	58758	56124	61562	63113
2014-09-25 07:02:48.319	58754	56102	61589	63178
2014-09-25 07:02:48.325	58768	56113	61593	63147
2014-09-25 07:02:48.329	58777	56103	61586	63131
2014-09-25 07:02:48.335	58762	56101	61608	63143
2014-09-25 07:02:48.339	58760	56104	61621	63099
2014-09-25 07:02:48.345	58769	56111	61627	63083
2014-09-25 07:02:48.349	58757	56118	61600	63056
2014-09-25 07:02:48.355	58749	56110	61556	62993
2014-09-25 07:02:48.359	58768	56116	61563	62978
2014-09-25 07:02:48.365	58774	56118	61579	62980
2014-09-25 07:02:48.369	58760	56126	61613	63014
2014-09-25 07:02:48.375	58765	56111	61629	63057
2014-09-25 07:02:48.380	58757	56100	61618	63090
2014-09-25 07:02:48.384	58745	56115	61614	63143
2014-09-25 07:02:48.390	58753	56122	61606	63142
2014-09-25 07:02:48.394	58759	56095	61628	63160
2014-09-25 07:02:48.400	58773	56089	61627	63169
2014-09-25 07:02:48.404	58754	56111	61585	63087
2014-09-25 07:02:48.410	58746	56106	61548	63058
2014-09-25 07:02:48.414	58777	56118	61545	63095
2014-09-25 07:02:48.420	58766	56112	61582	63142
2014-09-25 07:02:48.424	58757	56113	61593	63178
2014-09-25 07:02:48.430	58764	56123	61595	63136
2014-09-25 07:02:48.434	58761	56106	61585	63095
2014-09-25 07:02:48.440	58759	56105	61573	63085
2014-09-25 07:02:48.444	58752	56120	61605	63086
2014-09-25 07:02:48.450	58772	56110	61600	63104
2014-09-25 07:02:48.454	58770	56105	61571	63065
2014-09-25 07:02:48.460	58747	56140	61577	63030
2014-09-25 07:02:48.464	58762	56111	61572	63073
2014-09-25 07:02:48.470	58757	56101	61600	63095
2014-09-25 07:02:48.474	58743	56118	61651	63069
2014-09-25 07:02:48.480	58752	56096	61630	63035
2014-09-25 07:02:48.484	58763	56108	61613	63038
2014-09-25 07:02:48.490	58772	56110	61619	63044
2014-09-25 07:02:48.494	58759	56096	61614	63052
2014-09-25 07:02:48.500	58758	56107	61633	63104
2014-09-25 07:02:48.505	58775	56119	61609	63093
2014-09-25 07:02:48.509	58759	56115	61579	63032
2014-09-25 07:02:48.515	58758	56128	61594	63048
2014-09-25 07:02:48.519	58772	56130	61599	63120
2014-09-25 07:02:48.525	58765	56111	61597	63165
2014-09-25 07:02:48.529	58758	56108	61575	63163
2014-09-25 07:02:48.535	58739	56102	61552	63174
2014-09-25 07:02:48.539	58744	56097	61565	63162
2014-09-25 07:02:48.545	58752	56100	61603	63134
2014-09-25 07:02:48.549	58744	56113	61620	63121
2014-09-25 07:02:48.555	58750	56110	61577	63093
2014-09-25 07:02:48.559	58745	56111	61564	63069
2014-09-25 07:02:48.565	58756	56105	61559	63063
2014-09-25 07:02:48.569	58764	56115	61542	63082
2014-09-25 07:02:48.575	58753	56127	61566	63081
2014-09-25 07:02:48.579	58765	56096	61568	63031
2014-09-25 07:02:48.585	58757	56103	61555	62988
2014-09-25 07:02:48.589	58758	56097	61573	62997
2014-09-25 07:02:48.595	58776	56083	61594	63038
2014-09-25 07:02:48.599	58765	56101	61610	63076
2014-09-25 07:02:48.605	58764	56100	61615	63094
2014-09-25 07:02:48.609	58760	56093	61589	63083
2014-09-25 07:02:48.615	58756	56098	61590	63081
2014-09-25 07:02:48.619	58769	56117	61623	63105
2014-09-25 07:02:48.625	58756	56111	61634	63109
2014-09-25 07:02:48.630	58733	56102	61637	63104
2014-09-25 07:02:48.634	58741	56107	61618	63097
2014-09-25 07:02:48.640	58759	56106	61598	63086
2014-09-25 07:02:48.644	58765	56091	61607	63124
2014-09-25 07:02:48.650	58769	56096	61615	63164
2014-09-25 07:02:48.654	58761	56102	61616	63127
2014-09-25 07:02:48.660	58747	56101	61603	63077
2014-09-25 07:02:48.664	58753	56121	61574	63057
2014-09-25 07:02:48.670	58759	56110	61563	63070
2014-09-25 07:02:48.674	58757	56112	61563	63102
2014-09-25 07:02:48.680	58760	56106	61581	63090
2014-09-25 07:02:48.684	58762	56102	61594	63075
2014-09-25 07:02:48.690	58762	56107	61584	63075
2014-09-25 07:02:48.694	58754	56092	61592	63064
2014-09-25 07:02:48.700	58752	56112	61591	63084
2014-09-25 07:02:48.704	58769	56100	61587	63110
2014-09-25 07:02:48.710	58752	56096	61589	63084
2014-09-25 07:02:48.714	58734	56111	61577	63065
2014-09-25 07:02:48.720	58765	56105	61570	63079
2014-09-25 07:02:48.724	58765	56115	61582	63088
2014-09-25 07:02:48.730	58739	56115	61611	63094
2014-09-25 07:02:48.734	58747	56107	61612	63083
2014-09-25 07:02:48.740	58754	56102	61590	63073
2014-09-25 07:02:48.744	58748	56108	61593	63078
2014-09-25 07:02:48.750	58775	56110	61602	63081
2014-09-25 07:02:48.755	58778	56098	61598	63101
2014-09-25 07:02:48.759	58753	56092	61585	63093
2014-09-25 07:02:48.765	58765	56117	61578	63055
2014-09-25 07:02:48.769	58769	56105	61582	63069
2014-09-25 07:02:48.775	58765	56084	61587	63103
2014-09-25 07:02:48.779	58756	56107	61611	63108
2014-09-25 07:02:48.785	58740	56094	61613	63110
2014-09-25 07:02:48.789	58759	56093	61602	63101
2014-09-25 07:02:48.795	58759	56090	61625	63111
2014-09-25 07:02:48.799	58748	56104	61633	63141
2014-09-25 07:02:48.805	58766	56115	61657	63139
2014-09-25 07:02:48.809	58764	56093	61692	63110
2014-09-25 07:02:48.815	58762	56110	61661	63069
2014-09-25 07:02:48.819	58762	56117	61609	63077
2014-09-25 07:02:48.825	58755	56113	61580	63092
2014-09-25 07:02:48.829	58754	56099	61573	63059
2014-09-25 07:02:48.835	58754	56102	61592	63067
2014-09-25 07:02:48.839	58750	56097	61601	63065
2014-09-25 07:02:48.845	58750	56093	61581	63059
2014-09-25 07:02:48.849	58759	56115	61584	63108
2014-09-25 07:02:48.855	58756	56111	61610	63094
2014-09-25 07:02:48.859	58763	56126	61611	63060
2014-09-25 07:02:48.865	58760	56127	61599	63036
2014-09-25 07:02:48.869	58740	56119	61590	63009
2014-09-25 07:02:48.875	58759	56109	61582	63070
2014-09-25 07:02:48.880	58774	56113	61596	63113
2014-09-25 07:02:48.884	58768	56117	61616	63112
2014-09-25 07:02:48.890	58767	56096	61616	63107
2014-09-25 07:02:48.894	58764	56097	61609	63109
2014-09-25 07:02:48.900	58758	56098	61617	63158
2014-09-25 07:02:48.904	58755	56112	61640	63141
2014-09-25 07:02:48.910	58767	56099	61647	63108
2014-09-25 07:02:48.914	58759	56084	61622	63112
2014-09-25 07:02:48.920	58740	56106	61573	63108
2014-09-25 07:02:48.924	58759	56101	61535	63140
2014-09-25 07:02:48.930	58762	56088	61569	63158
2014-09-25 07:02:48.934	58756	56105	61610	63142
2014-09-25 07:02:48.940	58777	56105	61610	63083
2014-09-25 07:02:48.944	58760	56097	61620	63008
2014-09-25 07:02:48.950	58761	56120	61640	62991
2014-09-25 07:02:48.954	58775	56118	61672	62989
2014-09-25 07:02:48.960	58757	56107	61682	63010
2014-09-25 07:02:48.964	58767	56106	61654	63043
2014-09-25 07:02:48.970	58751	56100	61631	63064
2014-09-25 07:02:48.974	58753	56095	61583	63095
2014-09-25 07:02:48.980	58782	56091	61570	63083
2014-09-25 07:02:48.984	58762	56088	61605	63068
2014-09-25 07:02:48.990	58770	56090	61610	63075
2014-09-25 07:02:48.994	58773	56095	61603	63093
2014-09-25 07:02:49.000	58757	56082	61593	63175
2014-09-25 07:02:49.005	58773	56104	61594	63233
2014-09-25 07:02:49.009	58779	56102	61622	63239
2014-09-25 07:02:49.015	58776	56086	61614	63213
2014-09-25 07:02:49.019	58760	56101	61591	63144
2014-09-25 07:02:49.025	58757	56091	61576	63120
2014-09-25 07:02:49.029	58777	56093	61556	63093
2014-09-25 07:02:49.035	58773	56090	61586	63040
2014-09-25 07:02:49.039	58773	56098	61620	63008
2014-09-25 07:02:49.045	58775	56108	61610	62966
2014-09-25 07:02:49.049	58755	56104	61622	62983
2014-09-25 07:02:49.055	58767	56119	61650	63026
2014-09-25 07:02:49.059	58783	56117	61665	63063
2014-09-25 07:02:49.065	58769	56097	61662	63117
2014-09-25 07:02:49.069	58752	56092	61623	63119
2014-09-25 07:02:49.075	58762	56101	61565	63143
2014-09-25 07:02:49.079	58792	56113	61549	63175
2014-09-25 07:02:49.085	58782	56105	61599	63160
2014-09-25 07:02:49.089	58761	56085	61642	63139
2014-09-25 07:02:49.095	58764	56105	61633	63095
2014-09-25 07:02:49.099	58774	56104	61604	63085
2014-09-25 07:02:49.105	58789	56093	61610	63112
2014-09-25 07:02:49.109	58778	56112	61653	63119
2014-09-25 07:02:49.115	58774	56108	61653	63097
2014-09-25 07:02:49.119	58778	56100	61617	63056
2014-09-25 07:02:49.125	58770	56095	61593	63057
2014-09-25 07:02:49.130	58791	56109	61577	63075
2014-09-25 07:02:49.134	58780	56106	61600	63070
2014-09-25 07:02:49.140	58751	56110	61640	63078
2014-09-25 07:02:49.144	58776	56117	61647	63071
2014-09-25 07:02:49.150	58783	56112	61635	63102
2014-09-25 07:02:49.154	58784	56129	61648	63173
2014-09-25 07:02:49.160	58778	56104	61690	63166
2014-09-25 07:02:49.164	58763	56103	61699	63135
2014-09-25 07:02:49.170	58783	56127	61677	63107
2014-09-25 07:02:49.174	58776	56121	61633	63084
2014-09-25 07:02:49.180	58775	56104	61581	63106
2014-09-25 07:02:49.184	58786	56106	61596	63119
2014-09-25 07:02:49.190	58777	56113	61623	63094
2014-09-25 07:02:49.194	58777	56117	61626	63072
2014-09-25 07:02:49.200	58767	56112	61630	63072
2014-09-25 07:02:49.204	58774	56100	61618	63067
2014-09-25 07:02:49.210	58784	56133	61640	63070
2014-09-25 07:02:49.214	58793	56099	61661	63081
2014-09-25 07:02:49.220	58797	56090	61627	63091
2014-09-25 07:02:49.224	58768	56124	61608	63097
2014-09-25 07:02:49.230	58781	56100	61593	63108
2014-09-25 07:02:49.234	58793	56119	61586	63123
2014-09-25 07:02:49.240	58780	56113	61618	63120
2014-09-25 07:02:49.244	58778	56099	61633	63109
2014-09-25 07:02:49.250	58760	56100	61620	63108
2014-09-25 07:02:49.255	58788	56095	61608	63133
2014-09-25 07:02:49.259	58790	56119	61602	63154
2014-09-25 07:02:49.265	58757	56123	61612	63133
2014-09-25 07:02:49.269	58777	56102	61620	63112
2014-09-25 07:02:49.275	58774	56112	61608	63108
2014-09-25 07:02:49.279	58780	56121	61587	63121
2014-09-25 07:02:49.285	58796	56105	61585	63124
2014-09-25 07:02:49.289	58769	56119	61622	63115
2014-09-25 07:02:49.295	58766	56115	61649	63108
2014-09-25 07:02:49.299	58785	56114	61629	63084
2014-09-25 07:02:49.305	58795	56118	61620	63105
2014-09-25 07:02:49.309	58793	56113	61643	63131
2014-09-25 07:02:49.315	58789	56120	61672	63092
2014-09-25 07:02:49.319	58773	56097	61671	63080
2014-09-25 07:02:49.325	58757	56098	61639	63074
2014-09-25 07:02:49.329	58783	56112	61595	63076
2014-09-25 07:02:49.335	58796	56109	61574	63120
2014-09-25 07:02:49.339	58778	56119	61610	63132
2014-09-25 07:02:49.345	58769	56134	61632	63138
2014-09-25 07:02:49.349	58768	56135	61633	63136
2014-09-25 07:02:49.355	58782	56128	61633	63139
2014-09-25 07:02:49.359	58789	56124	61635	63168
2014-09-25 07:02:49.365	58788	56110	61674	63139
2014-09-25 07:02:49.369	58787	56116	61673	63099
2014-09-25 07:02:49.375	58784	56111	61645	63078
2014-09-25 07:02:49.380	58773	56111	61633	63055
2014-09-25 07:02:49.384	58764	56123	61621	63068
2014-09-25 07:02:49.390	58784	56118	61622	63076
2014-09-25 07:02:49.394	58785	56125	61619	63091
2014-09-25 07:02:49.400	58775	56133	61620	63118
2014-09-25 07:02:49.404	58787	56126	61606	63131
2014-09-25 07:02:49.410	58785	56112	61582	63152
2014-09-25 07:02:49.414	58794	56124	61606	63133
2014-09-25 07:02:49.420	58808	56118	61638	63078
2014-09-25 07:02:49.424	58786	56092	61641	63083
2014-09-25 07:02:49.430	58776	56113	61613	63140
2014-09-25 07:02:49.434	58786	56117	61577	63178
2014-09-25 07:02:49.440	58788	56089	61585	63188
2014-09-25 07:02:49.444	58794	56107	61638	63170
2014-09-25 07:02:49.450	58789	56122	61660	63122
2014-09-25 07:02:49.454	58786	56104	61625	63089
2014-09-25 07:02:49.460	58793	56114	61626	63090
2014-09-25 07:02:49.464	58785	56106	61653	63089
2014-09-25 07:02:49.470	58793	56111	61664	63101
2014-09-25 07:02:49.474	58802	56116	61670	63111
2014-09-25 07:02:49.480	58784	56102	61635	63097
2014-09-25 07:02:49.484	58801	56122	61599	63097
2014-09-25 07:02:49.490	58812	56116	61624	63096
2014-09-25 07:02:49.494	58779	56118	61666	63079
2014-09-25 07:02:49.500	58783	56130	61672	63055
2014-09-25 07:02:49.505	58786	56127	61650	63058
2014-09-25 07:02:49.509	58777	56119	61630	63106
2014-09-25 07:02:49.515	58799	56119	61635	63137
2014-09-25 07:02:49.519	58793	56125	61665	63154
2014-09-25 07:02:49.525	58790	56115	61664	63150
2014-09-25 07:02:49.529	58792	56125	61633	63111
2014-09-25 07:02:49.535	58782	56132	61593	63108
2014-09-25 07:02:49.539	58791	56124	61562	63139
2014-09-25 07:02:49.545	58787	56109	61589	63168
2014-09-25 07:02:49.549	58785	56118	61620	63175
2014-09-25 07:02:49.555	58780	56115	61626	63166
2014-09-25 07:02:49.559	58782	56100	61626	63155
2014-09-25 07:02:49.565	58790	56106	61630	63133
2014-09-25 07:02:49.569	58786	56107	61665	63119
2014-09-25 07:02:49.575	58800	56113	61686	63108
2014-09-25 07:02:49.579	58787	56105	61649	63075
2014-09-25 07:02:49.585	58780	56119	61611	63047
2014-09-25 07:02:49.589	58807	56119	61603	63055
2014-09-25 07:02:49.595	58792	56115	61608	63071
2014-09-25 07:02:49.599	58777	56132	61649	63058
2014-09-25 07:02:49.605	58786	56116	61678	63067
2014-09-25 07:02:49.609	58795	56095	61637	63101
2014-09-25 07:02:49.615	58800	56097	61614	63136
2014-09-25 07:02:49.619	58793	56122	61636	63170
2014-09-25 07:02:49.625	58793	56097	61646	63174
2014-09-25 07:02:49.630	58789	56097	61642	63156
2014-09-25 07:02:49.634	58778	56124	61621	63111
2014-09-25 07:02:49.640	58784	56111	61599	63076
2014-09-25 07:02:49.644	58793	56115	61612	63097
2014-09-25 07:02:49.650	58781	56118	61634	63122
2014-09-25 07:02:49.654	58772	56116	61619	63130
2014-09-25 07:02:49.660	58795	56107	61600	63150
2014-09-25 07:02:49.664	58785	56101	61590	63171
2014-09-25 07:02:49.670	58772	56109	61599	63143
2014-09-25 07:02:49.674	58802	56121	61647	63119
2014-09-25 07:02:49.680	58791	56101	61664	63107
2014-09-25 07:02:49.684	58777	56101	61632	63059
2014-09-25 07:02:49.690	58793	56125	61589	63063
2014-09-25 07:02:49.694	58780	56110	61594	63067
2014-09-25 07:02:49.700	58766	56123	61637	63045
2014-09-25 07:02:49.704	58785	56125	61641	63033
2014-09-25 07:02:49.710	58796	56111	61640	63010
2014-09-25 07:02:49.714	58779	56109	61634	63090
2014-09-25 07:02:49.720	58779	56121	61632	63171
2014-09-25 07:02:49.724	58785	56121	61662	63202
2014-09-25 07:02:49.730	58781	56107	61648	63249
2014-09-25 07:02:49.734	58780	56131	61616	63202
2014-09-25 07:02:49.740	58780	56115	61600	63166
2014-09-25 07:02:49.744	58788	56109	61584	63166
2014-09-25 07:02:49.750	58787	56132	61626	63139
2014-09-25 07:02:49.755	58783	56120	61647	63104
2014-09-25 07:02:49.759	58780	56105	61621	63081
2014-09-25 07:02:49.765	58786	56100	61620	63113
2014-09-25 07:02:49.769	58795	56101	61611	63119
2014-09-25 07:02:49.775	58795	56107	61647	63122
2014-09-25 07:02:49.779	58786	56104	61678	63115
2014-09-25 07:02:49.785	58761	56091	61641	63042
2014-09-25 07:02:49.789	58772	56104	61609	63020
2014-09-25 07:02:49.795	58797	56108	61575	63047
2014-09-25 07:02:49.799	58785	56114	61575	63073
2014-09-25 07:02:49.805	58784	56104	61610	63085
2014-09-25 07:02:49.809	58780	56095	61613	63085
2014-09-25 07:02:49.815	58770	56100	61603	63106
2014-09-25 07:02:49.819	58789	56088	61626	63142
2014-09-25 07:02:49.825	58792	56111	61671	63172
2014-09-25 07:02:49.829	58781	56103	61680	63176
2014-09-25 07:02:49.835	58778	56118	61667	63166
2014-09-25 07:02:49.839	58776	56130	61656	63141
2014-09-25 07:02:49.845	58790	56109	61625	63143
2014-09-25 07:02:49.849	58797	56124	61626	63153
2014-09-25 07:02:49.855	58777	56110	61661	63107
2014-09-25 07:02:49.859	58773	56109	61656	63085
2014-09-25 07:02:49.865	58780	56103	61627	63110
2014-09-25 07:02:49.869	58765	56100	61619	63114
2014-09-25 07:02:49.875	58769	56115	61637	63137
2014-09-25 07:02:49.880	58786	56114	61656	63144
2014-09-25 07:02:49.884	58766	56123	61635	63100
2014-09-25 07:02:49.890	58767	56123	61614	63045
2014-09-25 07:02:49.894	58793	56136	61619	63028
2014-09-25 07:02:49.900	58779	56133	61600	63055
2014-09-25 07:02:49.904	58757	56108	61607	63060
2014-09-25 07:02:49.910	58768	56108	61642	63054
2014-09-25 07:02:49.914	58777	56116	61635	63069
2014-09-25 07:02:49.920	58769	56107	61605	63099
2014-09-25 07:02:49.924	58770	56113	61614	63124
2014-09-25 07:02:49.930	58781	56121	61655	63127
2014-09-25 07:02:49.934	58777	56116	61654	63138
2014-09-25 07:02:49.940	58766	56113	61610	63122
2014-09-25 07:02:49.944	58768	56108	61577	63122
2014-09-25 07:02:49.950	58781	56119	61553	63168
2014-09-25 07:02:49.954	58777	56102	61574	63162
2014-09-25 07:02:49.960	58743	56107	61617	63136
2014-09-25 07:02:49.964	58760	56114	61609	63121
2014-09-25 07:02:49.970	58790	56097	61611	63130
2014-09-25 07:02:49.974	58769	56109	61610	63174
2014-09-25 07:02:49.980	58786	56101	61607	63177
2014-09-25 07:02:49.984	58785	56108	61639	63122
2014-09-25 07:02:49.990	58758	56112	61614	63057
2014-09-25 07:02:49.994	58784	56112	61580	63034
2014-09-25 07:02:50.000	58773	56103	61566	63036
2014-09-25 07:02:50.005	58762	56092	61565	63037
2014-09-25 07:02:50.009	58790	56110	61620	63057
2014-09-25 07:02:50.015	58764	56114	61620	63049
2014-09-25 07:02:50.019	58764	56114	61591	63060
2014-09-25 07:02:50.025	58775	56097	61595	63116
2014-09-25 07:02:50.029	58761	56110	61600	63133
2014-09-25 07:02:50.035	58772	56117	61633	63139
2014-09-25 07:02:50.039	58767	56109	61629	63114
2014-09-25 07:02:50.045	58774	56111	61605	63091
2014-09-25 07:02:50.049	58787	56099	61593	63125
2014-09-25 07:02:50.055	58757	56105	61579	63120
2014-09-25 07:02:50.059	58748	56098	61634	63083
2014-09-25 07:02:50.065	58759	56103	61649	63073
2014-09-25 07:02:50.069	58761	56100	61619	63098
2014-09-25 07:02:50.075	58768	56104	61626	63128
2014-09-25 07:02:50.079	58766	56128	61629	63134
2014-09-25 07:02:50.085	58766	56122	61653	63140
2014-09-25 07:02:50.089	58761	56118	61638	63117
2014-09-25 07:02:50.095	58774	56118	61596	63070
2014-09-25 07:02:50.099	58785	56124	61574	63071
2014-09-25 07:02:50.105	58770	56121	61554	63096
2014-09-25 07:02:50.109	58775	56120	61604	63080
2014-09-25 07:02:50.115	58763	56115	61626	63064
2014-09-25 07:02:50.119	58754	56111	61587	63088
2014-09-25 07:02:50.125	58772	56111	61595	63101
2014-09-25 07:02:50.130	58768	56117	61604	63126
2014-09-25 07:02:50.134	58767	56128	61628	63151
2014-09-25 07:02:50.140	58764	56123	61666	63117
2014-09-25 07:02:50.144	58750	56124	61652	63070
2014-09-25 07:02:50.150	58766	56109	61618	63070
2014-09-25 07:02:50.154	58776	56093	61596	63094
2014-09-25 07:02:50.160	58759	56091	61623	63110
2014-09-25 07:02:50.164	58757	56111	61636	63130
2014-09-25 07:02:50.170	58764	56112	61599	63140
2014-09-25 07:02:50.174	58762	56101	61590	63130
2014-09-25 07:02:50.180	58759	56132	61581	63116
2014-09-25 07:02:50.184	58771	56140	61618	63090
2014-09-25 07:02:50.190	58760	56128	61655	63050
2014-09-25 07:02:50.194	58752	56118	61601	63012
2014-09-25 07:02:50.200	58788	56123	61584	63039
2014-09-25 07:02:50.204	58770	56110	61575	63090
2014-09-25 07:02:50.210	58752	56113	61580	63087
2014-09-25 07:02:50.214	58764	56130	61626	63076
2014-09-25 07:02:50.220	58750	56104	61605	63064
2014-09-25 07:02:50.224	58771	56115	61594	63063
2014-09-25 07:02:50.230	58761	56119	61586	63099
2014-09-25 07:02:50.234	58740	56124	61584	63138
2014-09-25 07:02:50.240	58758	56130	61646	63163
2014-09-25 07:02:50.244	58755	56114	61654	63135
2014-09-25 07:02:50.250	58758	56112	61603	63120
2014-09-25 07:02:50.255	58763	56099	61557	63154
2014-09-25 07:02:50.259	58758	56108	61553	63133
2014-09-25 07:02:50.265	58754	56108	61590	63093
2014-09-25 07:02:50.269	58755	56106	61597	63066
2014-09-25 07:02:50.275	58762	56111	61576	63053
2014-09-25 07:02:50.279	58763	56106	61562	63071
2014-09-25 07:02:50.285	58778	56122	61590	63067
2014-09-25 07:02:50.289	58777	56131	61640	63065
2014-09-25 07:02:50.295	58770	56120	61631	63043
2014-09-25 07:02:50.299	58769	56114	61598	63040
2014-09-25 07:02:50.305	58761	56121	61558	63113
2014-09-25 07:02:50.309	58767	56119	61532	63155
2014-09-25 07:02:50.315	58755	56118	61585	63162
2014-09-25 07:02:50.319	58748	56115	61616	63138
2014-09-25 07:02:50.325	58760	56114	61592	63105
2014-09-25 07:02:50.329	58765	56108	61589	63096
2014-09-25 07:02:50.335	58769	56126	61597	63073
2014-09-25 07:02:50.339	58763	56127	61618	63072
2014-09-25 07:02:50.345	58747	56095	61627	63053
2014-09-25 07:02:50.349	58753	56108	61604	63034
2014-09-25 07:02:50.355	58770	56104	61574	63061
2014-09-25 07:02:50.359	58770	56104	61550	63090
2014-09-25 07:02:50.365	58760	56109	61568	63101
2014-09-25 07:02:50.369	58746	56109	61609	63089
2014-09-25 07:02:50.375	58756	56131	61591	63100
2014-09-25 07:02:50.380	58761	56115	61559	63125
2014-09-25 07:02:50.384	58763	56108	61576	63161
2014-09-25 07:02:50.390	58776	56126	61613	63186
2014-09-25 07:02:50.394	58753	56112	61641	63145
2014-09-25 07:02:50.400	58750	56086	61636	63091
2014-09-25 07:02:50.404	58764	56106	61596	63073
2014-09-25 07:02:50.410	58760	56116	61543	63097
2014-09-25 07:02:50.414	58763	56111	61543	63094
2014-09-25 07:02:50.420	58749	56115	61584	63081
2014-09-25 07:02:50.424	58738	56106	61567	63087
2014-09-25 07:02:50.430	58752	56119	61533	63050
2014-09-25 07:02:50.434	58766	56128	61557	63048
2014-09-25 07:02:50.440	58756	56119	61559	63059
2014-09-25 07:02:50.444	58753	56095	61578	63059
2014-09-25 07:02:50.450	58753	56103	61631	63086
2014-09-25 07:02:50.454	58750	56114	61572	63124
2014-09-25 07:02:50.460	58775	56115	61561	63199
2014-09-25 07:02:50.464	58763	56125	61600	63196
2014-09-25 07:02:50.470	58755	56114	61575	63104
2014-09-25 07:02:50.474	58769	56137	61667	63047
2014-09-25 07:02:50.480	58748	56122	61641	63016
2014-09-25 07:02:50.484	58768	56107	61543	63026
2014-09-25 07:02:50.490	58786	56112	61647	63083
2014-09-25 07:02:50.494	58763	56101	61640	63115
2014-09-25 07:02:50.500	58760	56120	61618	63118
2014-09-25 07:02:50.505	58760	56102	61652	63113
2014-09-25 07:02:50.509	58756	56112	61532	63120
2014-09-25 07:02:50.515	58766	56119	61526	63142
2014-09-25 07:02:50.519	58764	56113	61609	63122
2014-09-25 07:02:50.525	58739	56125	61588	63102
2014-09-25 07:02:50.529	58752	56109	61597	63120
2014-09-25 07:02:50.535	58772	56104	61587	63116
2014-09-25 07:02:50.539	58768	56098	61546	63112
2014-09-25 07:02:50.545	58760	56111	61588	63096
2014-09-25 07:02:50.549	58737	56105	61618	63045
2014-09-25 07:02:50.555	58752	56103	61604	63028
2014-09-25 07:02:50.559	58768	56125	61576	63067
2014-09-25 07:02:50.565	58754	56103	61516	63098
2014-09-25 07:02:50.569	58760	56110	61518	63085
2014-09-25 07:02:50.575	58746	56141	61567	63053
2014-09-25 07:02:50.579	58749	56129	61579	63036
2014-09-25 07:02:50.585	58780	56112	61567	63064
2014-09-25 07:02:50.589	58762	56107	61557	63123
2014-09-25 07:02:50.595	58747	56110	61578	63167
2014-09-25 07:02:50.599	58750	56110	61625	63175
2014-09-25 07:02:50.605	58754	56083	61647	63171
2014-09-25 07:02:50.609	58766	56106	61622	63171
2014-09-25 07:02:50.615	58764	56127	61587	63161
2014-09-25 07:02:50.619	58763	56101	61601	63126
2014-09-25 07:02:50.625	58763	56104	61634	63062
2014-09-25 07:02:50.630	58757	56112	61623	63023
2014-09-25 07:02:50.634	58765	56109	61601	63034
2014-09-25 07:02:50.640	58764	56095	61582	63027
2014-09-25 07:02:50.644	58772	56104	61591	63021
2014-09-25 07:02:50.650	58775	56104	61624	63019
2014-09-25 07:02:50.654	58747	56108	61618	63011
2014-09-25 07:02:50.660	58744	56127	61590	63058
2014-09-25 07:02:50.664	58767	56121	61555	63123
2014-09-25 07:02:50.670	58763	56128	61556	63137
2014-09-25 07:02:50.674	58748	56115	61583	63115
2014-09-25 07:02:50.680	58734	56127	61571	63102
2014-09-25 07:02:50.684	58736	56133	61570	63142
2014-09-25 07:02:50.690	58758	56113	61574	63175
2014-09-25 07:02:50.694	58760	56108	61588	63164
2014-09-25 07:02:50.700	58757	56114	61633	63151
2014-09-25 07:02:50.704	58758	56132	61624	63118
2014-09-25 07:02:50.710	58756	56106	61588	63089
2014-09-25 07:02:50.714	58759	56105	61571	63117
2014-09-25 07:02:50.720	58755	56111	61569	63128
2014-09-25 07:02:50.724	58755	56107	61598	63072
2014-09-25 07:02:50.730	58748	56109	61606	63032
2014-09-25 07:02:50.734	58765	56110	61592	63037
2014-09-25 07:02:50.740	58776	56108	61571	63062
2014-09-25 07:02:50.744	58756	56100	61576	63095
2014-09-25 07:02:50.750	58761	56122	61620	63106
2014-09-25 07:02:50.755	58746	56094	61613	63090
2014-09-25 07:02:50.759	58743	56103	61573	63056
2014-09-25 07:02:50.765	58761	56133	61554	63050
2014-09-25 07:02:50.769	58748	56118	61530	63043
2014-09-25 07:02:50.775	58754	56134	61535	63035
2014-09-25 07:02:50.779	58747	56123	61566	63059
2014-09-25 07:02:50.785	58738	56121	61557	63083
2014-09-25 07:02:50.789	58759	56123	61528	63141
2014-09-25 07:02:50.795	58766	56100	61519	63179
2014-09-25 07:02:50.799	58756	56111	61555	63144
2014-09-25 07:02:50.805	58740	56135	61599	63104
2014-09-25 07:02:50.809	58741	56122	61573	63087
2014-09-25 07:02:50.815	58749	56120	61533	63107
2014-09-25 07:02:50.819	58760	56131	61519	63139
2014-09-25 07:02:50.825	58762	56113	61543	63137
2014-09-25 07:02:50.829	58746	56114	61592	63111
2014-09-25 07:02:50.835	58751	56104	61604	63056
2014-09-25 07:02:50.839	58765	56100	61608	63027
2014-09-25 07:02:50.845	58767	56114	61591	63052
2014-09-25 07:02:50.849	58757	56114	61593	63049
2014-09-25 07:02:50.855	58746	56117	61629	63033
2014-09-25 07:02:50.859	58737	56116	61619	63016
2014-09-25 07:02:50.865	58745	56115	61592	63030
2014-09-25 07:02:50.869	58758	56117	61552	63089
2014-09-25 07:02:50.875	58754	56118	61554	63088
2014-09-25 07:02:50.880	58748	56100	61598	63053
2014-09-25 07:02:50.884	58734	56114	61585	63074
2014-09-25 07:02:50.890	58752	56126	61567	63144
2014-09-25 07:02:50.894	58774	56110	61556	63199
2014-09-25 07:02:50.900	58747	56129	61560	63203
2014-09-25 07:02:50.904	58741	56140	61629	63173
2014-09-25 07:02:50.910	58745	56132	61633	63125
2014-09-25 07:02:50.914	58745	56131	61575	63096
2014-09-25 07:02:50.920	58755	56136	61548	63096
2014-09-25 07:02:50.924	58763	56120	61526	63095
2014-09-25 07:02:50.930	58755	56114	61553	63081
2014-09-25 07:02:50.934	58748	56124	61581	63043
2014-09-25 07:02:50.940	58752	56115	61573	63023
2014-09-25 07:02:50.944	58747	56114	61574	63021
2014-09-25 07:02:50.950	58766	56114	61581	62991
2014-09-25 07:02:50.954	58775	56118	61615	62997
2014-09-25 07:02:50.960	58752	56106	61605	63018
2014-09-25 07:02:50.964	58749	56104	61574	63057
2014-09-25 07:02:50.970	58747	56120	61566	63132
2014-09-25 07:02:50.974	58747	56103	61537	63149
2014-09-25 07:02:50.980	58764	56103	61574	63117
2014-09-25 07:02:50.984	58757	56115	61616	63068
2014-09-25 07:02:50.990	58740	56106	61584	63073
2014-09-25 07:02:50.994	58756	56110	61557	63143
2014-09-25 07:02:51.000	58767	56126	61563	63195
2014-09-25 07:02:51.005	58755	56123	61576	63209
2014-09-25 07:02:51.009	58760	56103	61588	63172
2014-09-25 07:02:51.015	58750	56104	61561	63114
2014-09-25 07:02:51.019	58748	56134	61508	63098
2014-09-25 07:02:51.025	58755	56111	61506	63087
2014-09-25 07:02:51.029	58738	56100	61525	63057
2014-09-25 07:02:51.035	58753	56124	61558	63058
2014-09-25 07:02:51.039	58756	56114	61568	63065
2014-09-25 07:02:51.045	58744	56110	61536	63057
2014-09-25 07:02:51.049	58752	56102	61570	63054
2014-09-25 07:02:51.055	58756	56120	61611	63022
2014-09-25 07:02:51.059	58750	56119	61606	63000
2014-09-25 07:02:51.065	58737	56094	61586	63008
2014-09-25 07:02:51.069	58750	56116	61541	63028
2014-09-25 07:02:51.075	58753	56104	61517	63072
2014-09-25 07:02:51.079	58750	56101	61535	63102
2014-09-25 07:02:51.085	58753	56111	61575	63099
2014-09-25 07:02:51.089	58734	56107	61594	63112
2014-09-25 07:02:51.095	58742	56121	61581	63162
2014-09-25 07:02:51.099	58759	56126	61572	63191
2014-09-25 07:02:51.105	58747	56127	61581	63179
2014-09-25 07:02:51.109	58740	56127	61587	63152
2014-09-25 07:02:51.115	58751	56130	61568	63108
2014-09-25 07:02:51.119	58755	56128	61540	63085
2014-09-25 07:02:51.125	58763	56119	61536	63075
2014-09-25 07:02:51.130	58755	56122	61559	63046
2014-09-25 07:02:51.134	58735	56121	61571	63009
2014-09-25 07:02:51.140	58741	56109	61562	62990
2014-09-25 07:02:51.144	58736	56112	61535	63029
2014-09-25 07:02:51.150	58750	56109	61524	63077
2014-09-25 07:02:51.154	58754	56116	61562	63078
2014-09-25 07:02:51.160	58738	56129	61603	63045
2014-09-25 07:02:51.164	58747	56114	61590	63016
2014-09-25 07:02:51.170	58741	56121	61538	63031
2014-09-25 07:02:51.174	58744	56116	61504	63072
2014-09-25 07:02:51.180	58744	56107	61507	63110
2014-09-25 07:02:51.184	58751	56118	61550	63120
2014-09-25 07:02:51.190	58752	56119	61591	63107
2014-09-25 07:02:51.194	58740	56124	61578	63121
2014-09-25 07:02:51.200	58764	56107	61563	63133
2014-09-25 07:02:51.204	58748	56114	61581	63124
2014-09-25 07:02:51.210	58740	56131	61609	63116
2014-09-25 07:02:51.214	58753	56115	61626	63088
2014-09-25 07:02:51.220	58723	56124	61583	63092
2014-09-25 07:02:51.224	58743	56126	61560	63126
2014-09-25 07:02:51.230	58766	56105	61552	63106
2014-09-25 07:02:51.234	58740	56110	61561	63063
2014-09-25 07:02:51.240	58744	56114	61630	63025
2014-09-25 07:02:51.244	58747	56109	61589	63025
2014-09-25 07:02:51.250	58739	56120	61575	63047
2014-09-25 07:02:51.255	58746	56117	61534	63040
2014-09-25 07:02:51.259	58749	56124	61538	63022
2014-09-25 07:02:51.265	58741	56127	61606	62988
2014-09-25 07:02:51.269	58742	56122	61518	62992
2014-09-25 07:02:51.275	58735	56131	61578	63040
2014-09-25 07:02:51.279	58721	56107	61498	63075
2014-09-25 07:02:51.285	58744	56110	61464	63100
2014-09-25 07:02:51.289	58737	56132	61614	63104
2014-09-25 07:02:51.295	58731	56119	61527	63121
2014-09-25 07:02:51.299	58752	56113	61590	63152
2014-09-25 07:02:51.305	58738	56115	61594	63141
2014-09-25 07:02:51.309	58747	56124	61553	63116
2014-09-25 07:02:51.315	58738	56124	61624	63094
2014-09-25 07:02:51.319	58717	56121	61561	63085
2014-09-25 07:02:51.325	58736	56120	61535	63109
2014-09-25 07:02:51.329	58735	56104	61517	63111
2014-09-25 07:02:51.335	58736	56101	61526	63064
2014-09-25 07:02:51.339	58735	56115	61597	63004
2014-09-25 07:02:51.345	58725	56122	61601	62956
2014-09-25 07:02:51.349	58737	56109	61555	62992
2014-09-25 07:02:51.355	58755	56109	61550	63066
2014-09-25 07:02:51.359	58745	56131	61593	63069
2014-09-25 07:02:51.365	58728	56122	61600	63045
2014-09-25 07:02:51.369	58759	56110	61596	63020
2014-09-25 07:02:51.375	58746	56115	61565	63019
2014-09-25 07:02:51.380	58714	56107	61509	63055
2014-09-25 07:02:51.384	58749	56114	61496	63095
2014-09-25 07:02:51.390	58740	56108	61529	63120
2014-09-25 07:02:51.394	58722	56107	61551	63121
2014-09-25 07:02:51.400	58740	56123	61518	63128
2014-09-25 07:02:51.404	58738	56109	61495	63140
2014-09-25 07:02:51.410	58735	56118	61513	63141
2014-09-25 07:02:51.414	58735	56113	61546	63098
2014-09-25 07:02:51.420	58736	56109	61581	63031
2014-09-25 07:02:51.424	58730	56118	61569	63039
2014-09-25 07:02:51.430	58736	56103	61520	63070
2014-09-25 07:02:51.434	58747	56106	61510	63083
2014-09-25 07:02:51.440	58733	56104	61546	63050
2014-09-25 07:02:51.444	58746	56129	61591	62994
2014-09-25 07:02:51.450	58736	56141	61601	63001
2014-09-25 07:02:51.454	58722	56113	61548	63027
2014-09-25 07:02:51.460	58740	56130	61532	63065
2014-09-25 07:02:51.464	58732	56126	61561	63107
2014-09-25 07:02:51.470	58729	56103	61559	63115
2014-09-25 07:02:51.474	58735	56119	61560	63111
2014-09-25 07:02:51.480	58732	56117	61528	63119
2014-09-25 07:02:51.484	58732	56113	61497	63140
2014-09-25 07:02:51.490	58738	56107	61536	63105
2014-09-25 07:02:51.494	58732	56104	61583	63035
2014-09-25 07:02:51.500	58729	56123	61597	63021
2014-09-25 07:02:51.505	58738	56126	61568	63035
2014-09-25 07:02:51.509	58721	56099	61536	63042
2014-09-25 07:02:51.515	58732	56099	61549	63049
2014-09-25 07:02:51.519	58734	56108	61588	63028
2014-09-25 07:02:51.525	58710	56108	61579	63001
2014-09-25 07:02:51.529	58745	56114	61544	63026
2014-09-25 07:02:51.535	58742	56101	61524	63081
2014-09-25 07:02:51.539	58726	56125	61518	63095
2014-09-25 07:02:51.545	58740	56073	61567	63054
2014-09-25 07:02:51.549	58722	56077	61579	63038
2014-09-25 07:02:51.555	58727	56259	61525	63056
2014-09-25 07:02:51.559	58734	56256	61533	63057
2014-09-25 07:02:51.565	58725	56182	61560	63086
2014-09-25 07:02:51.569	58743	56167	61563	63107
2014-09-25 07:02:51.575	58735	56132	61580	63100
2014-09-25 07:02:51.579	58734	56132	61555	63122
2014-09-25 07:02:51.585	58750	56117	61501	63150
2014-09-25 07:02:51.589	58743	56124	61501	63125
2014-09-25 07:02:51.595	58737	56120	61540	63076
2014-09-25 07:02:51.599	58726	56106	61566	63060
2014-09-25 07:02:51.605	58730	56112	61560	63064
2014-09-25 07:02:51.609	58741	56102	61558	63090
2014-09-25 07:02:51.615	58740	56099	61573	63106
2014-09-25 07:02:51.619	58731	56102	61598	63063
2014-09-25 07:02:51.625	58721	56114	61606	62999
2014-09-25 07:02:51.630	58740	56108	61581	62973
2014-09-25 07:02:51.634	58760	56110	61560	63005
2014-09-25 07:02:51.640	58750	56119	61537	63037
2014-09-25 07:02:51.644	58735	56110	61542	63055
2014-09-25 07:02:51.650	58735	56122	61577	63062
2014-09-25 07:02:51.654	58736	56118	61552	63059
2014-09-25 07:02:51.660	58736	56099	61525	63084
2014-09-25 07:02:51.664	58740	56101	61549	63104
2014-09-25 07:02:51.670	58728	56110	61571	63091
2014-09-25 07:02:51.674	58736	56115	61586	63084
2014-09-25 07:02:51.680	58740	56108	61572	63085
2014-09-25 07:02:51.684	58730	56103	61523	63103
2014-09-25 07:02:51.690	58756	56103	61512	63161
2014-09-25 07:02:51.694	58755	56104	61546	63145
2014-09-25 07:02:51.700	58730	56123	61580	63076
2014-09-25 07:02:51.704	58737	56117	61584	63101
2014-09-25 07:02:51.710	58736	56094	61554	63132
2014-09-25 07:02:51.714	58743	56099	61560	63106
2014-09-25 07:02:51.720	58757	56103	61580	63095
2014-09-25 07:02:51.724	58736	56113	61565	63083
2014-09-25 07:02:51.730	58728	56105	61546	63039
2014-09-25 07:02:51.734	58744	56108	61519	63011
2014-09-25 07:02:51.740	58737	56128	61506	63026
2014-09-25 07:02:51.744	58722	56114	61525	63003
2014-09-25 07:02:51.750	58728	56116	61563	62967
2014-09-25 07:02:51.755	58731	56114	61581	62994
2014-09-25 07:02:51.759	58752	56103	61542	63036
2014-09-25 07:02:51.765	58761	56103	61522	63087
2014-09-25 07:02:51.769	58730	56091	61549	63131
2014-09-25 07:02:51.775	58734	56101	61574	63116
2014-09-25 07:02:51.779	58746	56095	61604	63081
2014-09-25 07:02:51.785	58742	56090	61595	63069
2014-09-25 07:02:51.789	58753	56118	61556	63085
2014-09-25 07:02:51.795	58742	56104	61549	63094
2014-09-25 07:02:51.799	58733	56092	61552	63078
2014-09-25 07:02:51.805	58745	56109	61556	63070
2014-09-25 07:02:51.809	58746	56102	61566	63074
2014-09-25 07:02:51.815	58751	56093	61560	63080
2014-09-25 07:02:51.819	58751	56103	61566	63080
2014-09-25 07:02:51.825	58749	56117	61600	63077
2014-09-25 07:02:51.829	58738	56120	61604	63079
2014-09-25 07:02:51.835	58737	56114	61583	63081
2014-09-25 07:02:51.839	58758	56122	61556	63092
2014-09-25 07:02:51.845	58742	56119	61550	63095
2014-09-25 07:02:51.849	58735	56122	61575	63065
2014-09-25 07:02:51.855	58755	56133	61588	63038
2014-09-25 07:02:51.859	58750	56123	61595	63044
2014-09-25 07:02:51.865	58747	56110	61574	63056
2014-09-25 07:02:51.869	58746	56110	61562	63063
2014-09-25 07:02:51.875	58746	56102	61583	63063
2014-09-25 07:02:51.880	58744	56084	61586	63046
2014-09-25 07:02:51.884	58732	56113	61585	63045
2014-09-25 07:02:51.890	58748	56108	61561	63074
2014-09-25 07:02:51.894	58762	56079	61534	63114
2014-09-25 07:02:51.900	58734	56111	61542	63111
2014-09-25 07:02:51.904	58723	56113	61551	63088
2014-09-25 07:02:51.910	58748	56096	61552	63109
2014-09-25 07:02:51.914	58754	56102	61531	63096
2014-09-25 07:02:51.920	58751	56111	61524	63060
2014-09-25 07:02:51.924	58758	56095	61569	63047
2014-09-25 07:02:51.930	58743	56096	61594	63023
2014-09-25 07:02:51.934	58739	56116	61568	63051
2014-09-25 07:02:51.940	58758	56121	61543	63108
2014-09-25 07:02:51.944	58758	56127	61519	63139
2014-09-25 07:02:51.950	58756	56115	61511	63152
2014-09-25 07:02:51.954	58745	56119	61556	63102
2014-09-25 07:02:51.960	58735	56132	61578	63044
2014-09-25 07:02:51.964	58757	56121	61556	63055
2014-09-25 07:02:51.970	58757	56110	61544	63063
2014-09-25 07:02:51.974	58751	56130	61571	63064
2014-09-25 07:02:51.980	58753	56122	61609	63075
2014-09-25 07:02:51.984	58735	56103	61614	63071
2014-09-25 07:02:51.990	58748	56122	61599	63072
2014-09-25 07:02:51.994	58763	56107	61563	63051
2014-09-25 07:02:52.000	58749	56098	61544	63046
2014-09-25 07:02:52.005	58741	56104	61563	63055
2014-09-25 07:02:52.009	58737	56099	61573	63057
2014-09-25 07:02:52.015	58746	56090	61578	63089
2014-09-25 07:02:52.019	58753	56102	61557	63104
2014-09-25 07:02:52.025	58755	56122	61538	63117
2014-09-25 07:02:52.029	58762	56113	61572	63097
2014-09-25 07:02:52.035	58743	56108	61592	63045
2014-09-25 07:02:52.039	58747	56117	61592	63055
2014-09-25 07:02:52.045	58776	56125	61562	63084
2014-09-25 07:02:52.049	58763	56103	61520	63117
2014-09-25 07:02:52.055	58745	56106	61556	63116
2014-09-25 07:02:52.059	58745	56126	61592	63078
2014-09-25 07:02:52.065	58755	56122	61592	63055
2014-09-25 07:02:52.069	58767	56118	61599	63049
2014-09-25 07:02:52.075	58757	56128	61593	63061
2014-09-25 07:02:52.079	58748	56133	61599	63078
2014-09-25 07:02:52.085	58749	56100	61610	63114
2014-09-25 07:02:52.089	58741	56118	61591	63132
2014-09-25 07:02:52.095	58761	56132	61561	63134
2014-09-25 07:02:52.099	58768	56100	61539	63146
2014-09-25 07:02:52.105	58743	56100	61559	63098
2014-09-25 07:02:52.109	58748	56106	61605	63042
2014-09-25 07:02:52.115	58751	56105	61610	63059
2014-09-25 07:02:52.119	58755	56108	61576	63099
2014-09-25 07:02:52.125	58766	56098	61542	63118
2014-09-25 07:02:52.130	58758	56084	61555	63112
2014-09-25 07:02:52.134	58755	56102	61587	63079
2014-09-25 07:02:52.140	58757	56112	61577	63032
2014-09-25 07:02:52.144	58766	56125	61572	63033
2014-09-25 07:02:52.150	58764	56115	61553	63054
2014-09-25 07:02:52.154	58759	56112	61531	63046
2014-09-25 07:02:52.160	58754	56130	61564	63036
2014-09-25 07:02:52.164	58748	56107	61589	63030
2014-09-25 07:02:52.170	58769	56120	61590	63057
2014-09-25 07:02:52.174	58769	56103	61582	63114
2014-09-25 07:02:52.180	58754	56111	61585	63153
2014-09-25 07:02:52.184	58763	56128	61613	63149
2014-09-25 07:02:52.190	58757	56111	61598	63134
2014-09-25 07:02:52.194	58754	56138	61563	63148
2014-09-25 07:02:52.200	58772	56113	61553	63160
2014-09-25 07:02:52.204	58758	56108	61546	63135
2014-09-25 07:02:52.210	58741	56112	61560	63066
2014-09-25 07:02:52.214	58755	56096	61604	63000
2014-09-25 07:02:52.220	58750	56097	61629	62998
2014-09-25 07:02:52.224	58764	56098	61590	63026
2014-09-25 07:02:52.230	58775	56122	61578	63061
2014-09-25 07:02:52.234	58757	56112	61617	63096
2014-09-25 07:02:52.240	58763	56100	61623	63077
2014-09-25 07:02:52.244	58745	56099	61615	63049
2014-09-25 07:02:52.250	58749	56109	61564	63070
2014-09-25 07:02:52.255	58781	56115	61511	63075
2014-09-25 07:02:52.259	58754	56106	61542	63081
2014-09-25 07:02:52.265	58745	56106	61563	63089
2014-09-25 07:02:52.269	58773	56110	61552	63093
2014-09-25 07:02:52.275	58777	56123	61550	63121
2014-09-25 07:02:52.279	58764	56104	61548	63140
2014-09-25 07:02:52.285	58757	56115	61589	63154
2014-09-25 07:02:52.289	58762	56122	61633	63133
2014-09-25 07:02:52.295	58762	56104	61612	63095
2014-09-25 07:02:52.299	58771	56107	61585	63111
2014-09-25 07:02:52.305	58777	56100	61565	63115
2014-09-25 07:02:52.309	58759	56106	61561	63105
2014-09-25 07:02:52.315	58752	56108	61580	63088
2014-09-25 07:02:52.319	58763	56122	61588	63065
2014-09-25 07:02:52.325	58775	56114	61596	63057
2014-09-25 07:02:52.329	58769	56112	61594	63047
2014-09-25 07:02:52.335	58765	56128	61612	63033
2014-09-25 07:02:52.339	58767	56110	61620	63006
2014-09-25 07:02:52.345	58754	56115	61584	62995
2014-09-25 07:02:52.349	58767	56130	61562	63017
2014-09-25 07:02:52.355	58781	56122	61534	63054
2014-09-25 07:02:52.359	58762	56120	61536	63107
2014-09-25 07:02:52.365	58758	56123	61599	63126
2014-09-25 07:02:52.369	58773	56112	61612	63124
2014-09-25 07:02:52.375	58778	56122	61592	63151
2014-09-25 07:02:52.380	58764	56118	61565	63165
2014-09-25 07:02:52.384	58765	56114	61563	63151
2014-09-25 07:02:52.390	58773	56112	61604	63144
2014-09-25 07:02:52.394	58761	56102	61599	63116
2014-09-25 07:02:52.400	58760	56121	61580	63082
2014-09-25 07:02:52.404	58775	56108	61566	63113
2014-09-25 07:02:52.410	58765	56110	61543	63114
2014-09-25 07:02:52.414	58748	56128	61559	63067
2014-09-25 07:02:52.420	58763	56133	61581	63059
2014-09-25 07:02:52.424	58781	56123	61611	63051
2014-09-25 07:02:52.430	58781	56112	61624	63035
2014-09-25 07:02:52.434	58767	56137	61608	63051
2014-09-25 07:02:52.440	58763	56133	61622	63063
2014-09-25 07:02:52.444	58768	56124	61605	63043
2014-09-25 07:02:52.450	58757	56112	61573	63051
2014-09-25 07:02:52.454	58764	56101	61548	63107
2014-09-25 07:02:52.460	58774	56118	61538	63114
2014-09-25 07:02:52.464	58761	56122	61580	63096
2014-09-25 07:02:52.470	58760	56111	61586	63089
2014-09-25 07:02:52.474	58763	56127	61578	63092
2014-09-25 07:02:52.480	58771	56132	61578	63140
2014-09-25 07:02:52.484	58782	56128	61565	63179
2014-09-25 07:02:52.490	58762	56141	61592	63165
2014-09-25 07:02:52.494	58755	56103	61612	63134
2014-09-25 07:02:52.500	58762	56118	61594	63107
2014-09-25 07:02:52.505	58756	56123	61578	63086
2014-09-25 07:02:52.509	58774	56098	61570	63082
2014-09-25 07:02:52.515	58771	56125	61587	63067
2014-09-25 07:02:52.519	58753	56107	61617	63038
2014-09-25 07:02:52.525	58756	56118	61628	63043
2014-09-25 07:02:52.529	58767	56124	61598	63041
2014-09-25 07:02:52.535	58785	56111	61582	63033
2014-09-25 07:02:52.539	58769	56122	61624	63039
2014-09-25 07:02:52.545	58758	56112	61622	63043
2014-09-25 07:02:52.549	58764	56108	61614	63061
2014-09-25 07:02:52.555	58764	56117	61619	63103
2014-09-25 07:02:52.559	58791	56101	61547	63166
2014-09-25 07:02:52.565	58774	56101	61527	63181
2014-09-25 07:02:52.569	58736	56130	61559	63153
2014-09-25 07:02:52.575	58761	56113	61571	63129
2014-09-25 07:02:52.579	58781	56124	61605	63087
2014-09-25 07:02:52.585	58776	56126	61591	63086
2014-09-25 07:02:52.589	58768	56124	61595	63111
2014-09-25 07:02:52.595	58757	56124	61637	63098
2014-09-25 07:02:52.599	58765	56113	61636	63111
2014-09-25 07:02:52.605	58773	56137	61623	63125
2014-09-25 07:02:52.609	58769	56109	61583	63111
2014-09-25 07:02:52.615	58765	56115	61562	63099
2014-09-25 07:02:52.619	58766	56116	61604	63061
2014-09-25 07:02:52.625	58768	56097	61634	63028
2014-09-25 07:02:52.630	58778	56117	61603	63027
2014-09-25 07:02:52.634	58789	56110	61583	63050
2014-09-25 07:02:52.640	58756	56131	61615	63065
2014-09-25 07:02:52.644	58760	56127	61626	63050
2014-09-25 07:02:52.650	58788	56108	61607	63024
2014-09-25 07:02:52.654	58760	56105	61603	63027
2014-09-25 07:02:52.660	58771	56111	61568	63097
2014-09-25 07:02:52.664	58782	56121	61520	63151
2014-09-25 07:02:52.670	58754	56115	61549	63162
2014-09-25 07:02:52.674	58760	56117	61571	63147
2014-09-25 07:02:52.680	58773	56117	61585	63113
2014-09-25 07:02:52.684	58779	56122	61597	63118
2014-09-25 07:02:52.690	58767	56112	61597	63121
2014-09-25 07:02:52.694	58775	56121	61650	63139
2014-09-25 07:02:52.700	58785	56112	61664	63172
2014-09-25 07:02:52.704	58756	56111	61629	63172
2014-09-25 07:02:52.710	58765	56121	61584	63160
2014-09-25 07:02:52.714	58771	56115	61547	63122
2014-09-25 07:02:52.720	58761	56136	61558	63076
2014-09-25 07:02:52.724	58770	56111	61575	63014
2014-09-25 07:02:52.730	58753	56113	61599	62975
2014-09-25 07:02:52.734	58761	56130	61590	62997
2014-09-25 07:02:52.740	58773	56127	61567	63009
2014-09-25 07:02:52.744	58774	56123	61596	63031
2014-09-25 07:02:52.750	58779	56115	61614	63039
2014-09-25 07:02:52.755	58747	56115	61627	63033
2014-09-25 07:02:52.759	58766	56097	61624	63076
2014-09-25 07:02:52.765	58800	56126	61590	63115
2014-09-25 07:02:52.769	58763	56125	61603	63143
2014-09-25 07:02:52.775	58757	56101	61623	63177
2014-09-25 07:02:52.779	58767	56102	61629	63179
2014-09-25 07:02:52.785	58767	56108	61639	63181
2014-09-25 07:02:52.789	58773	56131	61621	63194
2014-09-25 07:02:52.795	58768	56128	61624	63198
2014-09-25 07:02:52.799	58773	56134	61640	63170
2014-09-25 07:02:52.805	58774	56136	61615	63112
2014-09-25 07:02:52.809	58780	56124	61589	63082
2014-09-25 07:02:52.815	58782	56113	61562	63079
2014-09-25 07:02:52.819	58776	56126	61545	63065
2014-09-25 07:02:52.825	58770	56123	61574	63040
2014-09-25 07:02:52.829	58749	56123	61605	63020
2014-09-25 07:02:52.835	58766	56137	61621	63016
2014-09-25 07:02:52.839	58779	56121	61601	63024
2014-09-25 07:02:52.845	58764	56128	61593	63036
2014-09-25 07:02:52.849	58781	56119	61608	63062
2014-09-25 07:02:52.855	58775	56118	61602	63105
2014-09-25 07:02:52.859	58771	56128	61603	63135
2014-09-25 07:02:52.865	58786	56125	61572	63148
2014-09-25 07:02:52.869	58765	56116	61553	63168
2014-09-25 07:02:52.875	58761	56133	61573	63159
2014-09-25 07:02:52.880	58770	56146	61567	63106
2014-09-25 07:02:52.884	58779	56120	61592	63073
2014-09-25 07:02:52.890	58785	56136	61590	63091
2014-09-25 07:02:52.894	58779	56122	61566	63106
2014-09-25 07:02:52.900	58778	56102	61619	63124
2014-09-25 07:02:52.904	58765	56108	61650	63141
2014-09-25 07:02:52.910	58768	56108	61643	63106
2014-09-25 07:02:52.914	58778	56110	61636	63107
2014-09-25 07:02:52.920	58773	56110	61589	63134
2014-09-25 07:02:52.924	58766	56119	61576	63106
2014-09-25 07:02:52.930	58756	56113	61597	63069
2014-09-25 07:02:52.934	58766	56112	61589	63059
2014-09-25 07:02:52.940	58778	56109	61589	63085
2014-09-25 07:02:52.944	58779	56123	61601	63098
2014-09-25 07:02:52.950	58770	56115	61604	63083
2014-09-25 07:02:52.954	58771	56120	61593	63065
2014-09-25 07:02:52.960	58781	56131	61589	63035
2014-09-25 07:02:52.964	58757	56122	61583	63033
2014-09-25 07:02:52.970	58763	56141	61555	63079
2014-09-25 07:02:52.974	58778	56125	61560	63110
2014-09-25 07:02:52.980	58772	56136	61582	63109
2014-09-25 07:02:52.984	58785	56122	61608	63113
2014-09-25 07:02:52.990	58769	56110	61614	63130
2014-09-25 07:02:52.994	58763	56125	61585	63149
[truncated: 11,200 more rows]
