# Supplementary material for: Seismic monitoring of small alpine rockfalls – validity, precision and limitations
Source: Copernicus journal article supplement (doi:10.5194/esurf-5-653-2017), 2017-10-16
Supplement: Supplementary file 2 [file esurf-5-653-2017-supplement.zip › event_8.txt]

Time	LAU02	LAU03	LAU04	LAU05
2014-10-26 20:08:15.005	63317	56418	63311	63981
2014-10-26 20:08:15.009	63323	56426	63295	63996
2014-10-26 20:08:15.015	63311	56423	63301	64019
2014-10-26 20:08:15.019	63318	56410	63304	64043
2014-10-26 20:08:15.025	63329	56424	63305	64048
2014-10-26 20:08:15.029	63319	56421	63315	64065
2014-10-26 20:08:15.035	63306	56429	63309	64104
2014-10-26 20:08:15.039	63307	56434	63297	64099
2014-10-26 20:08:15.045	63334	56415	63300	64091
2014-10-26 20:08:15.049	63337	56424	63302	64104
2014-10-26 20:08:15.055	63311	56430	63305	64088
2014-10-26 20:08:15.059	63301	56424	63326	64085
2014-10-26 20:08:15.065	63319	56421	63328	64088
2014-10-26 20:08:15.069	63336	56414	63326	64086
2014-10-26 20:08:15.075	63320	56430	63320	64093
2014-10-26 20:08:15.079	63327	56430	63304	64081
2014-10-26 20:08:15.085	63335	56419	63305	64093
2014-10-26 20:08:15.089	63305	56425	63301	64107
2014-10-26 20:08:15.095	63307	56430	63301	64085
2014-10-26 20:08:15.099	63311	56440	63314	64075
2014-10-26 20:08:15.105	63307	56424	63319	64055
2014-10-26 20:08:15.109	63327	56405	63307	64027
2014-10-26 20:08:15.115	63321	56422	63301	64018
2014-10-26 20:08:15.119	63314	56425	63299	64019
2014-10-26 20:08:15.125	63331	56414	63282	64031
2014-10-26 20:08:15.130	63314	56421	63298	64052
2014-10-26 20:08:15.134	63310	56432	63321	64059
2014-10-26 20:08:15.140	63334	56422	63309	64076
2014-10-26 20:08:15.144	63319	56418	63301	64098
2014-10-26 20:08:15.150	63313	56430	63314	64080
2014-10-26 20:08:15.154	63314	56419	63313	64098
2014-10-26 20:08:15.160	63312	56415	63304	64122
2014-10-26 20:08:15.164	63316	56424	63302	64132
2014-10-26 20:08:15.170	63307	56431	63298	64144
2014-10-26 20:08:15.174	63310	56435	63291	64096
2014-10-26 20:08:15.180	63312	56412	63278	64081
2014-10-26 20:08:15.184	63312	56417	63276	64055
2014-10-26 20:08:15.190	63320	56431	63283	64024
2014-10-26 20:08:15.194	63319	56423	63302	64034
2014-10-26 20:08:15.200	63317	56424	63314	64014
2014-10-26 20:08:15.204	63319	56423	63293	64024
2014-10-26 20:08:15.210	63314	56434	63300	64012
2014-10-26 20:08:15.214	63318	56436	63326	64007
2014-10-26 20:08:15.220	63323	56426	63339	64045
2014-10-26 20:08:15.224	63313	56434	63340	64048
2014-10-26 20:08:15.230	63319	56430	63324	64076
2014-10-26 20:08:15.234	63315	56423	63317	64105
2014-10-26 20:08:15.240	63318	56422	63319	64108
2014-10-26 20:08:15.244	63327	56426	63314	64116
2014-10-26 20:08:15.250	63315	56430	63310	64106
2014-10-26 20:08:15.255	63319	56430	63307	64070
2014-10-26 20:08:15.259	63315	56430	63296	64070
2014-10-26 20:08:15.265	63313	56424	63296	64096
2014-10-26 20:08:15.269	63322	56423	63299	64069
2014-10-26 20:08:15.275	63315	56421	63309	64060
2014-10-26 20:08:15.279	63320	56427	63313	64066
2014-10-26 20:08:15.285	63323	56426	63293	64040
2014-10-26 20:08:15.289	63310	56415	63288	64054
2014-10-26 20:08:15.295	63313	56427	63287	64078
2014-10-26 20:08:15.299	63316	56423	63291	64076
2014-10-26 20:08:15.305	63302	56405	63293	64068
2014-10-26 20:08:15.309	63316	56421	63291	64071
2014-10-26 20:08:15.315	63323	56430	63294	64078
2014-10-26 20:08:15.319	63303	56419	63285	64082
2014-10-26 20:08:15.325	63311	56425	63298	64102
2014-10-26 20:08:15.329	63320	56436	63311	64076
2014-10-26 20:08:15.335	63317	56427	63317	64059
2014-10-26 20:08:15.339	63315	56418	63317	64058
2014-10-26 20:08:15.345	63318	56420	63319	64023
2014-10-26 20:08:15.349	63324	56424	63340	64050
2014-10-26 20:08:15.355	63314	56426	63337	64085
2014-10-26 20:08:15.359	63312	56420	63332	64097
2014-10-26 20:08:15.365	63314	56424	63335	64113
2014-10-26 20:08:15.369	63316	56430	63336	64103
2014-10-26 20:08:15.375	63321	56417	63332	64089
2014-10-26 20:08:15.380	63313	56417	63320	64077
2014-10-26 20:08:15.384	63317	56413	63312	64069
2014-10-26 20:08:15.390	63317	56396	63311	64050
2014-10-26 20:08:15.394	63316	56408	63317	64034
2014-10-26 20:08:15.400	63323	56420	63318	64041
2014-10-26 20:08:15.404	63308	56405	63318	64048
2014-10-26 20:08:15.410	63305	56404	63319	64068
2014-10-26 20:08:15.414	63315	56417	63310	64067
2014-10-26 20:08:15.420	63322	56420	63313	64058
2014-10-26 20:08:15.424	63317	56432	63316	64074
2014-10-26 20:08:15.430	63312	56425	63297	64070
2014-10-26 20:08:15.434	63315	56419	63290	64063
2014-10-26 20:08:15.440	63311	56431	63300	64064
2014-10-26 20:08:15.444	63326	56415	63302	64070
2014-10-26 20:08:15.450	63326	56413	63294	64087
2014-10-26 20:08:15.454	63301	56418	63284	64099
2014-10-26 20:08:15.460	63302	56413	63296	64119
2014-10-26 20:08:15.464	63316	56417	63309	64118
2014-10-26 20:08:15.470	63319	56411	63311	64087
2014-10-26 20:08:15.474	63303	56415	63319	64074
2014-10-26 20:08:15.480	63300	56416	63298	64051
2014-10-26 20:08:15.484	63317	56423	63277	64026
2014-10-26 20:08:15.490	63322	56430	63287	64006
2014-10-26 20:08:15.494	63317	56412	63296	63989
2014-10-26 20:08:15.500	63308	56412	63302	64009
2014-10-26 20:08:15.505	63309	56413	63300	64039
2014-10-26 20:08:15.509	63323	56407	63305	64087
2014-10-26 20:08:15.515	63319	56408	63314	64116
2014-10-26 20:08:15.519	63313	56406	63316	64114
2014-10-26 20:08:15.525	63317	56415	63334	64117
2014-10-26 20:08:15.529	63308	56420	63326	64104
2014-10-26 20:08:15.535	63318	56413	63301	64092
2014-10-26 20:08:15.539	63317	56413	63313	64083
2014-10-26 20:08:15.545	63299	56416	63326	64089
2014-10-26 20:08:15.549	63311	56409	63343	64091
2014-10-26 20:08:15.555	63312	56408	63328	64056
2014-10-26 20:08:15.559	63317	56416	63299	64040
2014-10-26 20:08:15.565	63316	56415	63306	64042
2014-10-26 20:08:15.569	63305	56411	63282	64024
2014-10-26 20:08:15.575	63305	56405	63282	64011
2014-10-26 20:08:15.579	63295	56402	63293	64032
2014-10-26 20:08:15.585	63318	56416	63291	64065
2014-10-26 20:08:15.589	63317	56419	63325	64090
2014-10-26 20:08:15.595	63305	56410	63324	64102
2014-10-26 20:08:15.599	63331	56414	63306	64094
2014-10-26 20:08:15.605	63319	56410	63302	64100
2014-10-26 20:08:15.609	63298	56410	63291	64109
2014-10-26 20:08:15.615	63302	56421	63296	64069
2014-10-26 20:08:15.619	63315	56411	63295	64047
2014-10-26 20:08:15.625	63309	56408	63295	64044
2014-10-26 20:08:15.630	63297	56409	63304	64051
2014-10-26 20:08:15.634	63308	56406	63293	64091
2014-10-26 20:08:15.640	63318	56418	63284	64101
2014-10-26 20:08:15.644	63315	56410	63288	64112
2014-10-26 20:08:15.650	63303	56399	63275	64132
2014-10-26 20:08:15.654	63305	56415	63280	64127
2014-10-26 20:08:15.660	63313	56410	63299	64093
2014-10-26 20:08:15.664	63308	56397	63281	64035
2014-10-26 20:08:15.670	63300	56398	63274	64023
2014-10-26 20:08:15.674	63313	56409	63280	64009
2014-10-26 20:08:15.680	63333	56413	63299	63996
2014-10-26 20:08:15.684	63313	56407	63335	64029
2014-10-26 20:08:15.690	63298	56402	63326	64018
2014-10-26 20:08:15.694	63312	56412	63306	64008
2014-10-26 20:08:15.700	63316	56412	63307	64037
2014-10-26 20:08:15.704	63309	56390	63326	64081
2014-10-26 20:08:15.710	63308	56390	63339	64119
2014-10-26 20:08:15.714	63318	56395	63318	64102
2014-10-26 20:08:15.720	63314	56393	63302	64103
2014-10-26 20:08:15.724	63305	56400	63295	64118
2014-10-26 20:08:15.730	63310	56395	63287	64114
2014-10-26 20:08:15.734	63301	56394	63297	64119
2014-10-26 20:08:15.740	63303	56408	63317	64119
2014-10-26 20:08:15.744	63319	56398	63317	64126
2014-10-26 20:08:15.750	63314	56393	63291	64096
2014-10-26 20:08:15.755	63310	56393	63269	64048
2014-10-26 20:08:15.759	63309	56386	63292	64026
2014-10-26 20:08:15.765	63317	56406	63300	64005
2014-10-26 20:08:15.769	63314	56403	63286	64008
2014-10-26 20:08:15.775	63292	56388	63302	64020
2014-10-26 20:08:15.779	63299	56388	63302	64028
2014-10-26 20:08:15.785	63307	56383	63310	64026
2014-10-26 20:08:15.789	63307	56395	63318	64005
2014-10-26 20:08:15.795	63302	56387	63315	64003
2014-10-26 20:08:15.799	63301	56385	63311	64011
2014-10-26 20:08:15.805	63323	56396	63286	64042
2014-10-26 20:08:15.809	63309	56396	63291	64093
2014-10-26 20:08:15.815	63299	56383	63302	64127
2014-10-26 20:08:15.819	63308	56381	63307	64156
2014-10-26 20:08:15.825	63296	56400	63314	64164
2014-10-26 20:08:15.829	63317	56378	63307	64141
2014-10-26 20:08:15.835	63306	56380	63306	64131
2014-10-26 20:08:15.839	63295	56400	63303	64117
2014-10-26 20:08:15.845	63316	56378	63294	64065
2014-10-26 20:08:15.849	63293	56384	63282	64022
2014-10-26 20:08:15.855	63305	56393	63270	64012
2014-10-26 20:08:15.859	63303	56384	63267	64029
2014-10-26 20:08:15.865	63292	56384	63275	64044
2014-10-26 20:08:15.869	63314	56391	63286	64031
2014-10-26 20:08:15.875	63296	56384	63284	64017
2014-10-26 20:08:15.880	63291	56375	63279	64029
2014-10-26 20:08:15.884	63294	56381	63289	64042
2014-10-26 20:08:15.890	63306	56385	63302	64020
2014-10-26 20:08:15.894	63307	56384	63319	64005
2014-10-26 20:08:15.900	63295	56383	63324	64014
2014-10-26 20:08:15.904	63289	56393	63306	64052
2014-10-26 20:08:15.910	63289	56388	63301	64089
2014-10-26 20:08:15.914	63318	56379	63280	64100
2014-10-26 20:08:15.920	63298	56385	63277	64115
2014-10-26 20:08:15.924	63280	56381	63316	64091
2014-10-26 20:08:15.930	63299	56378	63305	64069
2014-10-26 20:08:15.934	63294	56378	63297	64089
2014-10-26 20:08:15.940	63301	56377	63309	64090
2014-10-26 20:08:15.944	63307	56382	63299	64077
2014-10-26 20:08:15.950	63292	56381	63304	64075
2014-10-26 20:08:15.954	63287	56369	63305	64074
2014-10-26 20:08:15.960	63302	56367	63295	64054
2014-10-26 20:08:15.964	63299	56377	63282	64035
2014-10-26 20:08:15.970	63288	56366	63263	64017
2014-10-26 20:08:15.974	63290	56368	63257	64000
2014-10-26 20:08:15.980	63289	56383	63263	64008
2014-10-26 20:08:15.984	63303	56371	63284	64012
2014-10-26 20:08:15.990	63301	56369	63301	64004
2014-10-26 20:08:15.994	63293	56383	63298	64010
2014-10-26 20:08:16.000	63296	56383	63282	64018
2014-10-26 20:08:16.005	63293	56377	63273	64053
2014-10-26 20:08:16.009	63297	56371	63275	64108
2014-10-26 20:08:16.015	63291	56374	63291	64129
2014-10-26 20:08:16.019	63285	56374	63295	64136
2014-10-26 20:08:16.025	63285	56368	63272	64135
2014-10-26 20:08:16.029	63296	56376	63277	64107
2014-10-26 20:08:16.035	63295	56365	63292	64046
2014-10-26 20:08:16.039	63284	56371	63298	64012
2014-10-26 20:08:16.045	63285	56381	63299	64018
2014-10-26 20:08:16.049	63292	56367	63283	64007
2014-10-26 20:08:16.055	63302	56375	63277	64011
2014-10-26 20:08:16.059	63278	56361	63272	64010
2014-10-26 20:08:16.065	63262	56356	63277	64011
2014-10-26 20:08:16.069	63278	56372	63280	64042
2014-10-26 20:08:16.075	63289	56358	63271	64042
2014-10-26 20:08:16.079	63288	56358	63271	64008
2014-10-26 20:08:16.085	63273	56364	63269	64000
2014-10-26 20:08:16.089	63285	56355	63280	64043
2014-10-26 20:08:16.095	63293	56356	63286	64068
2014-10-26 20:08:16.099	63292	56372	63307	64058
2014-10-26 20:08:16.105	63276	56366	63311	64049
2014-10-26 20:08:16.109	63266	56359	63283	64030
2014-10-26 20:08:16.115	63299	56360	63298	64042
2014-10-26 20:08:16.119	63284	56346	63308	64078
2014-10-26 20:08:16.125	63263	56349	63302	64094
2014-10-26 20:08:16.130	63266	56358	63306	64087
2014-10-26 20:08:16.134	63273	56361	63296	64062
2014-10-26 20:08:16.140	63286	56355	63295	64053
2014-10-26 20:08:16.144	63264	56356	63296	64046
2014-10-26 20:08:16.150	63260	56352	63279	64043
2014-10-26 20:08:16.154	63273	56338	63256	64060
2014-10-26 20:08:16.160	63282	56351	63267	64042
2014-10-26 20:08:16.164	63283	56353	63291	64004
2014-10-26 20:08:16.170	63256	56346	63300	63992
2014-10-26 20:08:16.174	63267	56361	63305	63981
2014-10-26 20:08:16.180	63291	56357	63296	63962
2014-10-26 20:08:16.184	63271	56351	63297	63965
2014-10-26 20:08:16.190	63250	56351	63290	63994
2014-10-26 20:08:16.194	63269	56336	63267	64013
2014-10-26 20:08:16.200	63288	56334	63269	64027
2014-10-26 20:08:16.204	63270	56341	63260	64070
2014-10-26 20:08:16.210	63260	56329	63255	64089
2014-10-26 20:08:16.214	63266	56332	63265	64077
2014-10-26 20:08:16.220	63275	56347	63262	64081
2014-10-26 20:08:16.224	63261	56343	63261	64094
2014-10-26 20:08:16.230	63242	56344	63253	64110
2014-10-26 20:08:16.234	63259	56342	63255	64099
2014-10-26 20:08:16.240	63276	56330	63264	64078
2014-10-26 20:08:16.244	63268	56331	63260	64039
2014-10-26 20:08:16.250	63262	56322	63263	64001
2014-10-26 20:08:16.255	63259	56333	63268	64010
2014-10-26 20:08:16.259	63252	56342	63271	63984
2014-10-26 20:08:16.265	63259	56321	63276	63956
2014-10-26 20:08:16.269	63275	56328	63274	63940
2014-10-26 20:08:16.275	63253	56336	63272	63914
2014-10-26 20:08:16.279	63242	56332	63281	63935
2014-10-26 20:08:16.285	63279	56324	63277	63952
2014-10-26 20:08:16.289	63281	56327	63282	63992
2014-10-26 20:08:16.295	63257	56334	63279	64050
2014-10-26 20:08:16.299	63247	56325	63253	64075
2014-10-26 20:08:16.305	63249	56337	63267	64099
2014-10-26 20:08:16.309	63271	56339	63281	64100
2014-10-26 20:08:16.315	63266	56319	63289	64088
2014-10-26 20:08:16.319	63258	56325	63302	64072
2014-10-26 20:08:16.325	63253	56333	63277	64067
2014-10-26 20:08:16.329	63251	56319	63259	64056
2014-10-26 20:08:16.335	63268	56313	63248	64022
2014-10-26 20:08:16.339	63248	56326	63232	63979
2014-10-26 20:08:16.345	63237	56327	63228	63937
2014-10-26 20:08:16.349	63246	56320	63233	63931
2014-10-26 20:08:16.355	63252	56313	63247	63930
2014-10-26 20:08:16.359	63265	56313	63251	63937
2014-10-26 20:08:16.365	63247	56324	63260	63973
2014-10-26 20:08:16.369	63235	56314	63260	63994
2014-10-26 20:08:16.375	63253	56313	63238	63990
2014-10-26 20:08:16.380	63255	56323	63237	64002
2014-10-26 20:08:16.384	63243	56310	63240	64045
2014-10-26 20:08:16.390	63238	56302	63240	64037
2014-10-26 20:08:16.394	63243	56307	63251	64049
2014-10-26 20:08:16.400	63246	56306	63252	64094
2014-10-26 20:08:16.404	63239	56294	63247	64079
2014-10-26 20:08:16.410	63235	56300	63252	64073
2014-10-26 20:08:16.414	63243	56317	63268	64058
2014-10-26 20:08:16.420	63243	56299	63276	64019
2014-10-26 20:08:16.424	63246	56292	63273	63991
2014-10-26 20:08:16.430	63230	56309	63264	63983
2014-10-26 20:08:16.434	63220	56307	63268	63985
2014-10-26 20:08:16.440	63237	56301	63280	63977
2014-10-26 20:08:16.444	63226	56301	63274	63989
2014-10-26 20:08:16.450	63216	56294	63270	63963
2014-10-26 20:08:16.454	63224	56286	63264	63933
2014-10-26 20:08:16.460	63216	56298	63253	63937
2014-10-26 20:08:16.464	63216	56305	63249	63942
2014-10-26 20:08:16.470	63232	56288	63256	63976
2014-10-26 20:08:16.474	63226	56287	63248	63986
2014-10-26 20:08:16.480	63223	56277	63226	64005
2014-10-26 20:08:16.484	63242	56274	63235	64030
2014-10-26 20:08:16.490	63235	56286	63237	64051
2014-10-26 20:08:16.494	63226	56283	63221	64078
2014-10-26 20:08:16.500	63228	56286	63231	64048
2014-10-26 20:08:16.505	63224	56289	63231	64014
2014-10-26 20:08:16.509	63232	56287	63240	63984
2014-10-26 20:08:16.515	63229	56274	63255	63985
2014-10-26 20:08:16.519	63221	56265	63252	63995
2014-10-26 20:08:16.525	63212	56280	63265	63965
2014-10-26 20:08:16.529	63208	56271	63260	63963
2014-10-26 20:08:16.535	63222	56278	63237	63984
2014-10-26 20:08:16.539	63228	56294	63236	63999
2014-10-26 20:08:16.545	63222	56271	63251	63999
2014-10-26 20:08:16.549	63210	56266	63254	63993
2014-10-26 20:08:16.555	63218	56287	63244	63981
2014-10-26 20:08:16.559	63218	56275	63243	63953
2014-10-26 20:08:16.565	63201	56252	63231	63922
2014-10-26 20:08:16.569	63216	56271	63228	63935
2014-10-26 20:08:16.575	63225	56276	63252	63979
2014-10-26 20:08:16.579	63221	56258	63261	63984
2014-10-26 20:08:16.585	63209	56265	63257	64002
2014-10-26 20:08:16.589	63213	56278	63247	63980
2014-10-26 20:08:16.595	63224	56269	63253	63940
2014-10-26 20:08:16.599	63207	56252	63272	63971
2014-10-26 20:08:16.605	63217	56259	63261	63984
2014-10-26 20:08:16.609	63219	56271	63259	64004
2014-10-26 20:08:16.615	63212	56258	63256	64043
2014-10-26 20:08:16.619	63217	56246	63247	64061
2014-10-26 20:08:16.625	63200	56258	63243	64034
2014-10-26 20:08:16.630	63198	56262	63228	63986
2014-10-26 20:08:16.634	63203	56248	63228	63960
2014-10-26 20:08:16.640	63200	56248	63224	63932
2014-10-26 20:08:16.644	63204	56256	63215	63959
2014-10-26 20:08:16.650	63203	56253	63223	63979
2014-10-26 20:08:16.654	63194	56248	63230	63950
2014-10-26 20:08:16.660	63198	56261	63223	63935
2014-10-26 20:08:16.664	63217	56258	63224	63908
2014-10-26 20:08:16.670	63209	56241	63225	63906
2014-10-26 20:08:16.674	63200	56238	63220	63914
2014-10-26 20:08:16.680	63196	56237	63246	63934
2014-10-26 20:08:16.684	63193	56239	63252	63973
2014-10-26 20:08:16.690	63192	56232	63236	63969
2014-10-26 20:08:16.694	63189	56236	63255	63966
2014-10-26 20:08:16.700	63195	56238	63247	63973
2014-10-26 20:08:16.704	63192	56237	63224	63978
2014-10-26 20:08:16.710	63195	56243	63222	63990
2014-10-26 20:08:16.714	63194	56231	63207	63997
2014-10-26 20:08:16.720	63186	56230	63215	64000
2014-10-26 20:08:16.724	63183	56243	63231	63998
2014-10-26 20:08:16.730	63176	56232	63225	63991
2014-10-26 20:08:16.734	63187	56225	63228	63957
2014-10-26 20:08:16.740	63188	56230	63232	63948
2014-10-26 20:08:16.744	63176	56222	63236	63985
2014-10-26 20:08:16.750	63188	56225	63242	63995
2014-10-26 20:08:16.755	63195	56232	63248	63992
2014-10-26 20:08:16.759	63190	56217	63256	63988
2014-10-26 20:08:16.765	63176	56227	63247	63977
2014-10-26 20:08:16.769	63175	56231	63243	63962
2014-10-26 20:08:16.775	63196	56218	63257	63926
2014-10-26 20:08:16.779	63192	56229	63257	63913
2014-10-26 20:08:16.785	63188	56220	63237	63913
2014-10-26 20:08:16.789	63178	56214	63225	63906
2014-10-26 20:08:16.795	63171	56229	63224	63894
2014-10-26 20:08:16.799	63186	56220	63215	63861
2014-10-26 20:08:16.805	63179	56215	63193	63870
2014-10-26 20:08:16.809	63172	56206	63175	63918
2014-10-26 20:08:16.815	63176	56210	63167	63948
2014-10-26 20:08:16.819	63181	56223	63173	63953
2014-10-26 20:08:16.825	63180	56200	63187	63959
2014-10-26 20:08:16.829	63180	56208	63195	63975
2014-10-26 20:08:16.835	63171	56222	63199	63973
2014-10-26 20:08:16.839	63172	56204	63207	63966
2014-10-26 20:08:16.845	63196	56211	63207	63976
2014-10-26 20:08:16.849	63181	56218	63217	63976
2014-10-26 20:08:16.855	63170	56205	63228	63972
2014-10-26 20:08:16.859	63168	56214	63215	63992
2014-10-26 20:08:16.865	63159	56213	63226	64007
2014-10-26 20:08:16.869	63172	56197	63241	63975
2014-10-26 20:08:16.875	63165	56204	63224	63943
2014-10-26 20:08:16.880	63156	56208	63209	63934
2014-10-26 20:08:16.884	63156	56206	63198	63913
2014-10-26 20:08:16.890	63157	56196	63211	63893
2014-10-26 20:08:16.894	63161	56205	63238	63880
2014-10-26 20:08:16.900	63164	56216	63242	63870
2014-10-26 20:08:16.904	63180	56177	63234	63875
2014-10-26 20:08:16.910	63157	56191	63229	63901
2014-10-26 20:08:16.914	63149	56209	63231	63916
2014-10-26 20:08:16.920	63179	56188	63221	63910
2014-10-26 20:08:16.924	63169	56191	63203	63925
2014-10-26 20:08:16.930	63157	56185	63199	63926
2014-10-26 20:08:16.934	63161	56200	63206	63910
2014-10-26 20:08:16.940	63156	56198	63207	63929
2014-10-26 20:08:16.944	63165	56177	63188	63958
2014-10-26 20:08:16.950	63179	56206	63173	63957
2014-10-26 20:08:16.954	63158	56199	63168	63938
2014-10-26 20:08:16.960	63133	56181	63184	63943
2014-10-26 20:08:16.964	63147	56198	63196	63966
2014-10-26 20:08:16.970	63155	56189	63198	63970
2014-10-26 20:08:16.974	63156	56180	63224	63950
2014-10-26 20:08:16.980	63161	56175	63214	63914
2014-10-26 20:08:16.984	63147	56175	63202	63881
2014-10-26 20:08:16.990	63156	56184	63219	63862
2014-10-26 20:08:16.994	63160	56182	63207	63865
2014-10-26 20:08:17.000	63148	56176	63212	63878
2014-10-26 20:08:17.005	63153	56172	63214	63887
2014-10-26 20:08:17.009	63140	56182	63193	63918
2014-10-26 20:08:17.015	63151	56182	63208	63939
2014-10-26 20:08:17.019	63154	56170	63214	63925
2014-10-26 20:08:17.025	63149	56181	63211	63926
2014-10-26 20:08:17.029	63162	56192	63221	63931
2014-10-26 20:08:17.035	63128	56178	63207	63928
2014-10-26 20:08:17.039	63137	56172	63210	63934
2014-10-26 20:08:17.045	63163	56181	63230	63945
2014-10-26 20:08:17.049	63138	56168	63226	63952
2014-10-26 20:08:17.055	63137	56162	63214	63940
2014-10-26 20:08:17.059	63155	56173	63211	63927
2014-10-26 20:08:17.065	63159	56158	63192	63905
2014-10-26 20:08:17.069	63146	56169	63173	63868
2014-10-26 20:08:17.075	63132	56182	63173	63854
2014-10-26 20:08:17.079	63142	56148	63169	63855
2014-10-26 20:08:17.085	63153	56165	63189	63866
2014-10-26 20:08:17.089	63134	56179	63193	63877
2014-10-26 20:08:17.095	63125	56150	63188	63883
2014-10-26 20:08:17.099	63140	56165	63210	63916
2014-10-26 20:08:17.105	63153	56178	63210	63947
2014-10-26 20:08:17.109	63152	56171	63224	63967
2014-10-26 20:08:17.115	63136	56171	63241	63975
2014-10-26 20:08:17.119	63138	56158	63230	63966
2014-10-26 20:08:17.125	63146	56160	63233	63951
2014-10-26 20:08:17.130	63148	56163	63240	63943
2014-10-26 20:08:17.134	63128	56153	63251	63927
2014-10-26 20:08:17.140	63116	56168	63251	63898
2014-10-26 20:08:17.144	63149	56168	63225	63874
2014-10-26 20:08:17.150	63144	56166	63196	63841
2014-10-26 20:08:17.154	63123	56175	63190	63827
2014-10-26 20:08:17.160	63137	56165	63181	63835
2014-10-26 20:08:17.164	63141	56168	63162	63854
2014-10-26 20:08:17.170	63149	56160	63169	63869
2014-10-26 20:08:17.174	63136	56147	63172	63876
2014-10-26 20:08:17.180	63106	56163	63176	63919
2014-10-26 20:08:17.184	63119	56161	63187	63933
2014-10-26 20:08:17.190	63138	56155	63185	63930
2014-10-26 20:08:17.194	63144	56167	63175	63933
2014-10-26 20:08:17.200	63135	56159	63160	63897
2014-10-26 20:08:17.204	63131	56147	63168	63884
2014-10-26 20:08:17.210	63138	56152	63169	63896
2014-10-26 20:08:17.214	63132	56140	63169	63919
2014-10-26 20:08:17.220	63133	56146	63180	63942
2014-10-26 20:08:17.224	63130	56155	63171	63925
2014-10-26 20:08:17.230	63127	56148	63176	63908
2014-10-26 20:08:17.234	63132	56157	63186	63896
2014-10-26 20:08:17.240	63125	56147	63174	63898
2014-10-26 20:08:17.244	63122	56134	63176	63882
2014-10-26 20:08:17.250	63142	56137	63171	63855
2014-10-26 20:08:17.255	63132	56150	63184	63881
2014-10-26 20:08:17.259	63118	56154	63228	63903
2014-10-26 20:08:17.265	63126	56140	63236	63911
2014-10-26 20:08:17.269	63121	56144	63225	63920
2014-10-26 20:08:17.275	63123	56154	63221	63911
2014-10-26 20:08:17.279	63120	56148	63209	63886
2014-10-26 20:08:17.285	63121	56137	63202	63844
2014-10-26 20:08:17.289	63133	56144	63183	63820
2014-10-26 20:08:17.295	63124	56149	63152	63848
2014-10-26 20:08:17.299	63127	56139	63158	63882
2014-10-26 20:08:17.305	63123	56147	63174	63881
2014-10-26 20:08:17.309	63123	56144	63171	63890
2014-10-26 20:08:17.315	63134	56130	63167	63905
2014-10-26 20:08:17.319	63117	56138	63145	63899
2014-10-26 20:08:17.325	63128	56134	63140	63910
2014-10-26 20:08:17.329	63134	56126	63164	63922
2014-10-26 20:08:17.335	63116	56131	63162	63910
2014-10-26 20:08:17.339	63118	56134	63182	63891
2014-10-26 20:08:17.345	63119	56129	63211	63896
2014-10-26 20:08:17.349	63133	56126	63205	63897
2014-10-26 20:08:17.355	63128	56134	63197	63883
2014-10-26 20:08:17.359	63114	56139	63187	63898
2014-10-26 20:08:17.365	63119	56133	63181	63904
2014-10-26 20:08:17.369	63116	56142	63195	63892
2014-10-26 20:08:17.375	63123	56148	63207	63878
2014-10-26 20:08:17.380	63116	56126	63191	63821
2014-10-26 20:08:17.384	63113	56121	63181	63781
2014-10-26 20:08:17.390	63125	56136	63195	63795
2014-10-26 20:08:17.394	63113	56133	63191	63799
2014-10-26 20:08:17.400	63122	56118	63182	63822
2014-10-26 20:08:17.404	63139	56128	63181	63884
2014-10-26 20:08:17.410	63125	56135	63179	63931
2014-10-26 20:08:17.414	63121	56118	63177	63955
2014-10-26 20:08:17.420	63120	56121	63171	63970
2014-10-26 20:08:17.424	63102	56133	63175	63977
2014-10-26 20:08:17.430	63108	56131	63196	63962
2014-10-26 20:08:17.434	63127	56122	63210	63935
2014-10-26 20:08:17.440	63111	56127	63198	63902
2014-10-26 20:08:17.444	63103	56137	63208	63836
2014-10-26 20:08:17.450	63111	56141	63223	63810
2014-10-26 20:08:17.454	63104	56118	63220	63825
2014-10-26 20:08:17.460	63115	56102	63215	63815
2014-10-26 20:08:17.464	63118	56122	63187	63801
2014-10-26 20:08:17.470	63114	56114	63179	63806
2014-10-26 20:08:17.474	63118	56118	63178	63831
2014-10-26 20:08:17.480	63105	56138	63167	63851
2014-10-26 20:08:17.484	63112	56120	63156	63878
2014-10-26 20:08:17.490	63119	56116	63132	63902
2014-10-26 20:08:17.494	63115	56118	63146	63900
2014-10-26 20:08:17.500	63108	56118	63172	63901
2014-10-26 20:08:17.505	63096	56121	63183	63911
2014-10-26 20:08:17.509	63110	56119	63183	63913
2014-10-26 20:08:17.515	63107	56124	63162	63900
2014-10-26 20:08:17.519	63098	56120	63173	63891
2014-10-26 20:08:17.525	63125	56115	63179	63882
2014-10-26 20:08:17.529	63119	56115	63146	63868
2014-10-26 20:08:17.535	63098	56122	63133	63854
2014-10-26 20:08:17.539	63116	56122	63156	63851
2014-10-26 20:08:17.545	63110	56114	63165	63842
2014-10-26 20:08:17.549	63090	56129	63139	63839
2014-10-26 20:08:17.555	63108	56121	63144	63834
2014-10-26 20:08:17.559	63102	56099	63164	63810
2014-10-26 20:08:17.565	63083	56125	63164	63809
2014-10-26 20:08:17.569	63114	56128	63166	63787
2014-10-26 20:08:17.575	63118	56114	63162	63799
2014-10-26 20:08:17.579	63097	56128	63169	63847
2014-10-26 20:08:17.585	63109	56121	63186	63866
2014-10-26 20:08:17.589	63107	56121	63183	63905
2014-10-26 20:08:17.595	63105	56118	63172	63897
2014-10-26 20:08:17.599	63110	56117	63172	63880
2014-10-26 20:08:17.605	63104	56110	63163	63896
2014-10-26 20:08:17.609	63104	56100	63151	63886
2014-10-26 20:08:17.615	63099	56125	63151	63902
2014-10-26 20:08:17.619	63103	56108	63136	63908
2014-10-26 20:08:17.625	63103	56095	63128	63867
2014-10-26 20:08:17.630	63117	56125	63146	63828
2014-10-26 20:08:17.634	63125	56123	63151	63817
2014-10-26 20:08:17.640	63092	56107	63144	63834
2014-10-26 20:08:17.644	63092	56105	63146	63839
2014-10-26 20:08:17.650	63105	56112	63150	63822
2014-10-26 20:08:17.654	63120	56113	63150	63836
2014-10-26 20:08:17.660	63108	56111	63149	63839
2014-10-26 20:08:17.664	63077	56114	63159	63799
2014-10-26 20:08:17.670	63092	56123	63149	63785
2014-10-26 20:08:17.674	63094	56117	63135	63793
2014-10-26 20:08:17.680	63101	56114	63165	63824
2014-10-26 20:08:17.684	63108	56117	63162	63858
2014-10-26 20:08:17.690	63098	56109	63147	63851
2014-10-26 20:08:17.694	63091	56122	63155	63854
2014-10-26 20:08:17.700	63083	56121	63136	63874
2014-10-26 20:08:17.704	63107	56113	63130	63901
2014-10-26 20:08:17.710	63099	56113	63148	63930
2014-10-26 20:08:17.714	63088	56105	63153	63941
2014-10-26 20:08:17.720	63109	56102	63141	63929
2014-10-26 20:08:17.724	63090	56096	63144	63871
2014-10-26 20:08:17.730	63092	56109	63150	63833
2014-10-26 20:08:17.734	63087	56119	63140	63837
2014-10-26 20:08:17.740	63079	56111	63141	63805
2014-10-26 20:08:17.744	63098	56119	63138	63787
2014-10-26 20:08:17.750	63084	56115	63129	63791
2014-10-26 20:08:17.755	63091	56107	63141	63781
2014-10-26 20:08:17.759	63095	56118	63158	63793
2014-10-26 20:08:17.765	63083	56115	63152	63805
2014-10-26 20:08:17.769	63087	56114	63123	63800
2014-10-26 20:08:17.775	63076	56112	63107	63783
2014-10-26 20:08:17.779	63087	56102	63118	63784
2014-10-26 20:08:17.785	63089	56121	63128	63821
2014-10-26 20:08:17.789	63072	56112	63135	63833
2014-10-26 20:08:17.795	63097	56090	63150	63842
2014-10-26 20:08:17.799	63099	56112	63145	63857
2014-10-26 20:08:17.805	63085	56110	63140	63868
2014-10-26 20:08:17.809	63092	56096	63144	63899
2014-10-26 20:08:17.815	63090	56108	63135	63893
2014-10-26 20:08:17.819	63092	56111	63150	63869
2014-10-26 20:08:17.825	63097	56106	63145	63871
2014-10-26 20:08:17.829	63100	56095	63116	63868
2014-10-26 20:08:17.835	63092	56107	63129	63849
2014-10-26 20:08:17.839	63084	56124	63125	63829
2014-10-26 20:08:17.845	63085	56104	63103	63801
2014-10-26 20:08:17.849	63082	56100	63113	63769
2014-10-26 20:08:17.855	63080	56110	63126	63777
2014-10-26 20:08:17.859	63080	56094	63138	63783
2014-10-26 20:08:17.865	63091	56096	63140	63787
2014-10-26 20:08:17.869	63090	56122	63137	63822
2014-10-26 20:08:17.875	63071	56122	63155	63827
2014-10-26 20:08:17.880	63076	56109	63168	63815
2014-10-26 20:08:17.884	63077	56114	63155	63830
2014-10-26 20:08:17.890	63080	56104	63142	63848
2014-10-26 20:08:17.894	63087	56099	63133	63845
2014-10-26 20:08:17.900	63067	56106	63119	63851
2014-10-26 20:08:17.904	63058	56111	63116	63867
2014-10-26 20:08:17.910	63075	56118	63113	63874
2014-10-26 20:08:17.914	63087	56109	63110	63864
2014-10-26 20:08:17.920	63085	56102	63120	63831
2014-10-26 20:08:17.924	63074	56111	63120	63828
2014-10-26 20:08:17.930	63073	56114	63117	63822
2014-10-26 20:08:17.934	63079	56108	63126	63809
2014-10-26 20:08:17.940	63076	56113	63126	63827
2014-10-26 20:08:17.944	63076	56115	63127	63831
2014-10-26 20:08:17.950	63084	56103	63139	63825
2014-10-26 20:08:17.954	63079	56108	63152	63824
2014-10-26 20:08:17.960	63060	56105	63152	63798
2014-10-26 20:08:17.964	63069	56102	63128	63776
2014-10-26 20:08:17.970	63091	56109	63108	63777
2014-10-26 20:08:17.974	63072	56095	63099	63771
2014-10-26 20:08:17.980	63060	56098	63109	63781
2014-10-26 20:08:17.984	63079	56113	63124	63798
2014-10-26 20:08:17.990	63078	56114	63107	63805
2014-10-26 20:08:17.994	63071	56113	63107	63817
2014-10-26 20:08:18.000	63061	56105	63100	63836
2014-10-26 20:08:18.005	63071	56094	63081	63868
2014-10-26 20:08:18.009	63083	56097	63095	63882
2014-10-26 20:08:18.015	63064	56106	63104	63865
2014-10-26 20:08:18.019	63068	56099	63115	63855
2014-10-26 20:08:18.025	63071	56094	63113	63837
2014-10-26 20:08:18.029	63079	56103	63085	63807
2014-10-26 20:08:18.035	63079	56107	63092	63804
2014-10-26 20:08:18.039	63059	56104	63110	63818
2014-10-26 20:08:18.045	63069	56107	63109	63832
2014-10-26 20:08:18.049	63073	56105	63110	63837
2014-10-26 20:08:18.055	63071	56105	63116	63802
2014-10-26 20:08:18.059	63065	56112	63139	63780
2014-10-26 20:08:18.065	63055	56104	63140	63782
2014-10-26 20:08:18.069	63062	56102	63127	63776
2014-10-26 20:08:18.075	63070	56118	63141	63769
2014-10-26 20:08:18.079	63083	56114	63134	63783
2014-10-26 20:08:18.085	63080	56109	63115	63802
2014-10-26 20:08:18.089	63067	56116	63112	63811
2014-10-26 20:08:18.095	63063	56108	63096	63830
2014-10-26 20:08:18.099	63060	56097	63083	63817
2014-10-26 20:08:18.105	63070	56100	63080	63805
2014-10-26 20:08:18.109	63075	56097	63074	63824
2014-10-26 20:08:18.115	63058	56087	63081	63825
2014-10-26 20:08:18.119	63062	56102	63091	63830
2014-10-26 20:08:18.125	63077	56115	63086	63819
2014-10-26 20:08:18.130	63065	56101	63089	63807
2014-10-26 20:08:18.134	63062	56098	63098	63797
2014-10-26 20:08:18.140	63063	56099	63100	63784
2014-10-26 20:08:18.144	63066	56094	63117	63820
2014-10-26 20:08:18.150	63081	56095	63109	63838
2014-10-26 20:08:18.154	63067	56097	63099	63840
2014-10-26 20:08:18.160	63056	56099	63118	63855
2014-10-26 20:08:18.164	63057	56104	63107	63849
2014-10-26 20:08:18.170	63062	56097	63112	63828
2014-10-26 20:08:18.174	63070	56099	63123	63790
2014-10-26 20:08:18.180	63055	56104	63112	63770
2014-10-26 20:08:18.184	63049	56086	63112	63779
2014-10-26 20:08:18.190	63066	56090	63103	63784
2014-10-26 20:08:18.194	63080	56088	63121	63776
2014-10-26 20:08:18.200	63071	56083	63139	63769
2014-10-26 20:08:18.204	63058	56094	63123	63795
2014-10-26 20:08:18.210	63070	56092	63104	63809
2014-10-26 20:08:18.214	63067	56102	63085	63806
2014-10-26 20:08:18.220	63059	56103	63097	63829
2014-10-26 20:08:18.224	63063	56097	63101	63807
2014-10-26 20:08:18.230	63060	56095	63091	63767
2014-10-26 20:08:18.234	63051	56094	63104	63778
2014-10-26 20:08:18.240	63057	56092	63115	63799
2014-10-26 20:08:18.244	63069	56101	63104	63813
2014-10-26 20:08:18.250	63076	56103	63085	63830
2014-10-26 20:08:18.255	63072	56090	63095	63867
2014-10-26 20:08:18.259	63050	56103	63104	63872
2014-10-26 20:08:18.265	63060	56094	63101	63852
2014-10-26 20:08:18.269	63069	56078	63116	63854
2014-10-26 20:08:18.275	63065	56093	63113	63831
2014-10-26 20:08:18.279	63063	56100	63094	63812
2014-10-26 20:08:18.285	63047	56109	63083	63814
2014-10-26 20:08:18.289	63064	56106	63080	63794
2014-10-26 20:08:18.295	63073	56093	63087	63767
2014-10-26 20:08:18.299	63067	56097	63096	63755
2014-10-26 20:08:18.305	63070	56099	63102	63751
2014-10-26 20:08:18.309	63052	56100	63103	63743
2014-10-26 20:08:18.315	63073	56110	63106	63752
2014-10-26 20:08:18.319	63083	56111	63103	63776
2014-10-26 20:08:18.325	63040	56113	63102	63798
2014-10-26 20:08:18.329	63041	56108	63107	63807
2014-10-26 20:08:18.335	63059	56103	63107	63800
2014-10-26 20:08:18.339	63062	56098	63113	63791
2014-10-26 20:08:18.345	63061	56087	63111	63793
2014-10-26 20:08:18.349	63057	56089	63102	63808
2014-10-26 20:08:18.355	63065	56098	63095	63831
2014-10-26 20:08:18.359	63064	56096	63099	63857
2014-10-26 20:08:18.365	63056	56084	63101	63872
2014-10-26 20:08:18.369	63058	56092	63088	63852
2014-10-26 20:08:18.375	63058	56098	63094	63834
2014-10-26 20:08:18.380	63067	56093	63099	63838
2014-10-26 20:08:18.384	63071	56101	63105	63814
2014-10-26 20:08:18.390	63058	56100	63121	63787
2014-10-26 20:08:18.394	63061	56099	63113	63787
2014-10-26 20:08:18.400	63068	56091	63120	63791
2014-10-26 20:08:18.404	63055	56089	63132	63780
2014-10-26 20:08:18.410	63061	56106	63133	63775
2014-10-26 20:08:18.414	63067	56101	63141	63772
2014-10-26 20:08:18.420	63063	56095	63142	63757
2014-10-26 20:08:18.424	63064	56102	63139	63771
2014-10-26 20:08:18.430	63064	56104	63116	63802
2014-10-26 20:08:18.434	63060	56102	63085	63827
2014-10-26 20:08:18.440	63050	56095	63075	63824
2014-10-26 20:08:18.444	63056	56095	63069	63814
2014-10-26 20:08:18.450	63063	56104	63068	63820
2014-10-26 20:08:18.454	63065	56101	63064	63806
2014-10-26 20:08:18.460	63071	56089	63059	63785
2014-10-26 20:08:18.464	63054	56098	63074	63778
2014-10-26 20:08:18.470	63057	56100	63075	63774
2014-10-26 20:08:18.474	63080	56087	63086	63753
2014-10-26 20:08:18.480	63064	56102	63112	63749
2014-10-26 20:08:18.484	63055	56107	63115	63800
2014-10-26 20:08:18.490	63073	56098	63128	63835
2014-10-26 20:08:18.494	63072	56111	63143	63842
2014-10-26 20:08:18.500	63064	56100	63134	63867
2014-10-26 20:08:18.505	63067	56093	63123	63879
2014-10-26 20:08:18.509	63060	56106	63116	63874
2014-10-26 20:08:18.515	63078	56117	63104	63846
2014-10-26 20:08:18.519	63086	56104	63093	63804
2014-10-26 20:08:18.525	63064	56082	63100	63793
2014-10-26 20:08:18.529	63063	56117	63099	63779
2014-10-26 20:08:18.535	63063	56129	63096	63787
2014-10-26 20:08:18.539	63067	56107	63133	63815
2014-10-26 20:08:18.545	63061	56114	63139	63805
2014-10-26 20:08:18.549	63059	56114	63126	63774
2014-10-26 20:08:18.555	63075	56112	63147	63747
2014-10-26 20:08:18.559	63064	56110	63144	63759
2014-10-26 20:08:18.565	63062	56101	63133	63787
2014-10-26 20:08:18.569	63064	56099	63117	63789
2014-10-26 20:08:18.575	63055	56111	63097	63771
2014-10-26 20:08:18.579	63066	56102	63115	63766
2014-10-26 20:08:18.585	63066	56094	63102	63789
2014-10-26 20:08:18.589	63060	56116	63080	63803
2014-10-26 20:08:18.595	63080	56099	63078	63822
2014-10-26 20:08:18.599	63088	56092	63064	63817
2014-10-26 20:08:18.605	63090	56108	63065	63829
2014-10-26 20:08:18.609	63083	56112	63067	63869
2014-10-26 20:08:18.615	63068	56115	63075	63860
2014-10-26 20:08:18.619	63084	56104	63083	63859
2014-10-26 20:08:18.625	63083	56116	63091	63843
2014-10-26 20:08:18.630	63071	56114	63112	63832
2014-10-26 20:08:18.634	63074	56114	63127	63858
2014-10-26 20:08:18.640	63072	56129	63137	63847
2014-10-26 20:08:18.644	63084	56108	63132	63838
2014-10-26 20:08:18.650	63072	56116	63121	63808
2014-10-26 20:08:18.654	63060	56122	63121	63772
2014-10-26 20:08:18.660	63063	56118	63125	63772
2014-10-26 20:08:18.664	63062	56119	63126	63757
2014-10-26 20:08:18.670	63086	56112	63115	63752
2014-10-26 20:08:18.674	63080	56124	63116	63766
2014-10-26 20:08:18.680	63072	56118	63127	63769
2014-10-26 20:08:18.684	63081	56113	63141	63794
2014-10-26 20:08:18.690	63071	56123	63148	63807
2014-10-26 20:08:18.694	63073	56121	63147	63787
2014-10-26 20:08:18.700	63078	56118	63152	63801
2014-10-26 20:08:18.704	63070	56121	63150	63837
2014-10-26 20:08:18.710	63075	56130	63147	63862
2014-10-26 20:08:18.714	63080	56126	63123	63882
2014-10-26 20:08:18.720	63073	56120	63103	63882
2014-10-26 20:08:18.724	63077	56114	63109	63876
2014-10-26 20:08:18.730	63082	56116	63098	63869
2014-10-26 20:08:18.734	63087	56132	63096	63854
2014-10-26 20:08:18.740	63098	56132	63104	63841
2014-10-26 20:08:18.744	63093	56131	63111	63826
2014-10-26 20:08:18.750	63078	56122	63114	63816
2014-10-26 20:08:18.755	63074	56122	63110	63820
2014-10-26 20:08:18.759	63095	56135	63122	63809
2014-10-26 20:08:18.765	63099	56121	63131	63781
2014-10-26 20:08:18.769	63078	56119	63134	63762
2014-10-26 20:08:18.775	63076	56134	63131	63750
2014-10-26 20:08:18.779	63088	56128	63143	63748
2014-10-26 20:08:18.785	63099	56124	63152	63766
2014-10-26 20:08:18.789	63095	56134	63138	63792
2014-10-26 20:08:18.795	63078	56132	63158	63810
2014-10-26 20:08:18.799	63079	56130	63170	63818
2014-10-26 20:08:18.805	63091	56146	63143	63815
2014-10-26 20:08:18.809	63089	56139	63140	63828
2014-10-26 20:08:18.815	63091	56132	63158	63854
2014-10-26 20:08:18.819	63093	56148	63159	63886
2014-10-26 20:08:18.825	63099	56136	63147	63929
2014-10-26 20:08:18.829	63105	56128	63145	63931
2014-10-26 20:08:18.835	63098	56139	63139	63914
2014-10-26 20:08:18.839	63091	56130	63128	63914
2014-10-26 20:08:18.845	63085	56135	63122	63853
2014-10-26 20:08:18.849	63097	56146	63114	63780
2014-10-26 20:08:18.855	63104	56142	63114	63746
2014-10-26 20:08:18.859	63086	56138	63123	63712
2014-10-26 20:08:18.865	63094	56141	63122	63712
2014-10-26 20:08:18.869	63112	56142	63114	63735
2014-10-26 20:08:18.875	63097	56135	63124	63784
2014-10-26 20:08:18.880	63099	56143	63138	63834
2014-10-26 20:08:18.884	63117	56155	63141	63850
2014-10-26 20:08:18.890	63106	56148	63136	63893
2014-10-26 20:08:18.894	63107	56151	63143	63894
2014-10-26 20:08:18.900	63106	56157	63160	63856
2014-10-26 20:08:18.904	63092	56153	63154	63832
2014-10-26 20:08:18.910	63107	56158	63142	63834
2014-10-26 20:08:18.914	63103	56153	63139	63880
2014-10-26 20:08:18.920	63102	56151	63157	63872
2014-10-26 20:08:18.924	63114	56165	63182	63888
2014-10-26 20:08:18.930	63116	56163	63171	63896
2014-10-26 20:08:18.934	63116	56167	63161	63842
2014-10-26 20:08:18.940	63107	56164	63147	63845
2014-10-26 20:08:18.944	63108	56155	63132	63815
2014-10-26 20:08:18.950	63113	56147	63148	63796
2014-10-26 20:08:18.954	63116	56142	63155	63821
2014-10-26 20:08:18.960	63106	56169	63161	63809
2014-10-26 20:08:18.964	63102	56170	63156	63799
2014-10-26 20:08:18.970	63111	56162	63141	63812
2014-10-26 20:08:18.974	63107	56172	63147	63854
2014-10-26 20:08:18.980	63121	56164	63157	63876
2014-10-26 20:08:18.984	63123	56160	63168	63902
2014-10-26 20:08:18.990	63113	56158	63169	63910
2014-10-26 20:08:18.994	63109	56163	63163	63872
2014-10-26 20:08:19.000	63109	56162	63160	63865
2014-10-26 20:08:19.005	63135	56163	63154	63870
2014-10-26 20:08:19.009	63134	56183	63154	63880
2014-10-26 20:08:19.015	63115	56179	63151	63884
2014-10-26 20:08:19.019	63114	56179	63138	63865
2014-10-26 20:08:19.025	63122	56167	63135	63842
2014-10-26 20:08:19.029	63130	56154	63145	63843
2014-10-26 20:08:19.035	63130	56177	63156	63845
2014-10-26 20:08:19.039	63139	56177	63173	63825
2014-10-26 20:08:19.045	63131	56176	63177	63852
2014-10-26 20:08:19.049	63128	56189	63170	63869
2014-10-26 20:08:19.055	63119	56183	63165	63862
2014-10-26 20:08:19.059	63108	56178	63169	63876
2014-10-26 20:08:19.065	63142	56189	63182	63865
2014-10-26 20:08:19.069	63131	56189	63197	63856
2014-10-26 20:08:19.075	63111	56184	63199	63865
2014-10-26 20:08:19.079	63139	56185	63167	63865
2014-10-26 20:08:19.085	63139	56191	63160	63845
2014-10-26 20:08:19.089	63135	56203	63170	63835
2014-10-26 20:08:19.095	63133	56184	63151	63849
2014-10-26 20:08:19.099	63132	56171	63157	63871
2014-10-26 20:08:19.105	63158	56183	63170	63898
2014-10-26 20:08:19.109	63146	56188	63178	63939
2014-10-26 20:08:19.115	63126	56194	63182	63961
2014-10-26 20:08:19.119	63139	56198	63174	63953
2014-10-26 20:08:19.125	63144	56203	63191	63947
2014-10-26 20:08:19.130	63158	56199	63204	63902
2014-10-26 20:08:19.134	63143	56196	63200	63868
2014-10-26 20:08:19.140	63138	56206	63200	63875
2014-10-26 20:08:19.144	63164	56206	63195	63832
2014-10-26 20:08:19.150	63154	56215	63186	63789
2014-10-26 20:08:19.154	63161	56199	63186	63803
2014-10-26 20:08:19.160	63150	56187	63190	63826
2014-10-26 20:08:19.164	63153	56211	63178	63845
2014-10-26 20:08:19.170	63176	56202	63182	63890
2014-10-26 20:08:19.174	63132	56195	63212	63907
2014-10-26 20:08:19.180	63140	56215	63209	63877
2014-10-26 20:08:19.184	63166	56213	63179	63880
2014-10-26 20:08:19.190	63161	56200	63181	63893
2014-10-26 20:08:19.194	63163	56202	63210	63904
2014-10-26 20:08:19.200	63156	56221	63221	63942
2014-10-26 20:08:19.204	63163	56215	63206	63970
2014-10-26 20:08:19.210	63155	56210	63203	63972
2014-10-26 20:08:19.214	63164	56221	63210	63973
2014-10-26 20:08:19.220	63172	56212	63213	63953
2014-10-26 20:08:19.224	63152	56220	63213	63919
2014-10-26 20:08:19.230	63162	56229	63202	63903
2014-10-26 20:08:19.234	63165	56223	63210	63888
2014-10-26 20:08:19.240	63170	56225	63227	63870
2014-10-26 20:08:19.244	63171	56219	63224	63858
2014-10-26 20:08:19.250	63172	56219	63211	63869
2014-10-26 20:08:19.255	63180	56224	63191	63875
2014-10-26 20:08:19.259	63166	56224	63188	63849
2014-10-26 20:08:19.265	63176	56230	63202	63842
2014-10-26 20:08:19.269	63181	56222	63208	63830
2014-10-26 20:08:19.275	63180	56227	63213	63852
2014-10-26 20:08:19.279	63193	56235	63221	63913
2014-10-26 20:08:19.285	63184	56229	63211	63935
2014-10-26 20:08:19.289	63184	56243	63199	63980
2014-10-26 20:08:19.295	63187	56248	63199	64015
2014-10-26 20:08:19.299	63183	56235	63204	64010
2014-10-26 20:08:19.305	63183	56243	63205	64003
2014-10-26 20:08:19.309	63184	56240	63193	63961
2014-10-26 20:08:19.315	63185	56234	63196	63932
2014-10-26 20:08:19.319	63175	56242	63210	63937
2014-10-26 20:08:19.325	63191	56228	63203	63952
2014-10-26 20:08:19.329	63196	56229	63198	63955
2014-10-26 20:08:19.335	63167	56246	63205	63943
2014-10-26 20:08:19.339	63189	56246	63218	63923
2014-10-26 20:08:19.345	63212	56245	63232	63885
2014-10-26 20:08:19.349	63194	56248	63228	63869
2014-10-26 20:08:19.355	63191	56245	63221	63864
2014-10-26 20:08:19.359	63188	56239	63227	63858
2014-10-26 20:08:19.365	63196	56250	63229	63880
2014-10-26 20:08:19.369	63206	56247	63228	63909
2014-10-26 20:08:19.375	63194	56249	63240	63911
2014-10-26 20:08:19.380	63202	56266	63243	63921
2014-10-26 20:08:19.384	63211	56250	63228	63951
2014-10-26 20:08:19.390	63197	56248	63242	63971
2014-10-26 20:08:19.394	63189	56256	63236	63996
2014-10-26 20:08:19.400	63199	56256	63213	63985
2014-10-26 20:08:19.404	63215	56268	63211	63962
2014-10-26 20:08:19.410	63218	56253	63200	63970
2014-10-26 20:08:19.414	63212	56250	63211	63956
2014-10-26 20:08:19.420	63200	56266	63232	63951
2014-10-26 20:08:19.424	63205	56262	63220	63949
2014-10-26 20:08:19.430	63216	56266	63222	63929
2014-10-26 20:08:19.434	63210	56279	63246	63916
2014-10-26 20:08:19.440	63211	56273	63259	63915
2014-10-26 20:08:19.444	63222	56262	63255	63941
2014-10-26 20:08:19.450	63230	56275	63240	63948
2014-10-26 20:08:19.454	63227	56275	63238	63943
2014-10-26 20:08:19.460	63220	56269	63229	63954
2014-10-26 20:08:19.464	63221	56283	63222	63960
2014-10-26 20:08:19.470	63221	56281	63246	63971
2014-10-26 20:08:19.474	63227	56277	63237	63977
2014-10-26 20:08:19.480	63239	56274	63215	63988
2014-10-26 20:08:19.484	63230	56269	63216	63967
2014-10-26 20:08:19.490	63225	56293	63214	63939
2014-10-26 20:08:19.494	63222	56292	63238	63937
2014-10-26 20:08:19.500	63221	56277	63261	63938
2014-10-26 20:08:19.505	63231	56287	63263	63974
2014-10-26 20:08:19.509	63224	56275	63270	63998
2014-10-26 20:08:19.515	63229	56274	63279	64002
2014-10-26 20:08:19.519	63239	56296	63285	63997
2014-10-26 20:08:19.525	63222	56288	63286	63970
2014-10-26 20:08:19.529	63233	56276	63293	63974
2014-10-26 20:08:19.535	63249	56291	63309	63964
2014-10-26 20:08:19.539	63234	56299	63292	63938
2014-10-26 20:08:19.545	63227	56290	63272	63949
2014-10-26 20:08:19.549	63226	56295	63280	63958
2014-10-26 20:08:19.555	63235	56301	63280	63967
2014-10-26 20:08:19.559	63253	56299	63260	63977
2014-10-26 20:08:19.565	63250	56303	63236	63963
2014-10-26 20:08:19.569	63250	56298	63231	63968
2014-10-26 20:08:19.575	63244	56293	63219	64012
2014-10-26 20:08:19.579	63241	56299	63222	64036
2014-10-26 20:08:19.585	63259	56297	63252	64042
2014-10-26 20:08:19.589	63249	56298	63264	64060
2014-10-26 20:08:19.595	63248	56308	63253	64042
2014-10-26 20:08:19.599	63257	56315	63235	64020
2014-10-26 20:08:19.605	63245	56316	63261	64024
2014-10-26 20:08:19.609	63256	56303	63298	64003
2014-10-26 20:08:19.615	63259	56307	63292	63983
2014-10-26 20:08:19.619	63242	56320	63282	63950
2014-10-26 20:08:19.625	63240	56306	63291	63930
2014-10-26 20:08:19.630	63246	56311	63287	63928
2014-10-26 20:08:19.634	63252	56312	63279	63909
2014-10-26 20:08:19.640	63248	56301	63287	63928
2014-10-26 20:08:19.644	63254	56308	63274	63961
2014-10-26 20:08:19.650	63269	56317	63252	63987
2014-10-26 20:08:19.654	63258	56331	63266	64005
2014-10-26 20:08:19.660	63253	56325	63279	64009
2014-10-26 20:08:19.664	63266	56318	63276	64025
2014-10-26 20:08:19.670	63274	56326	63287	64045
2014-10-26 20:08:19.674	63266	56328	63286	64055
2014-10-26 20:08:19.680	63252	56333	63287	64044
2014-10-26 20:08:19.684	63271	56317	63297	64034
2014-10-26 20:08:19.690	63282	56323	63300	64045
2014-10-26 20:08:19.694	63269	56350	63307	64053
2014-10-26 20:08:19.700	63264	56341	63288	64054
2014-10-26 20:08:19.704	63264	56339	63284	64027
2014-10-26 20:08:19.710	63265	56331	63307	63992
2014-10-26 20:08:19.714	63270	56329	63309	63998
2014-10-26 20:08:19.720	63265	56336	63296	63987
2014-10-26 20:08:19.724	63257	56326	63272	63958
2014-10-26 20:08:19.730	63282	56328	63277	63965
2014-10-26 20:08:19.734	63287	56335	63309	63963
2014-10-26 20:08:19.740	63267	56351	63303	63952
2014-10-26 20:08:19.744	63278	56352	63290	63969
2014-10-26 20:08:19.750	63281	56335	63301	63993
2014-10-26 20:08:19.755	63282	56344	63298	64025
2014-10-26 20:08:19.759	63272	56353	63280	64068
2014-10-26 20:08:19.765	63264	56343	63283	64102
2014-10-26 20:08:19.769	63289	56350	63274	64116
2014-10-26 20:08:19.775	63283	56358	63255	64102
2014-10-26 20:08:19.779	63281	56346	63286	64054
2014-10-26 20:08:19.785	63287	56359	63300	64010
2014-10-26 20:08:19.789	63275	56345	63284	63986
2014-10-26 20:08:19.795	63288	56328	63303	63969
2014-10-26 20:08:19.799	63295	56353	63318	63963
2014-10-26 20:08:19.805	63291	56347	63323	63990
2014-10-26 20:08:19.809	63292	56343	63321	64024
2014-10-26 20:08:19.815	63288	56344	63327	64015
2014-10-26 20:08:19.819	63299	56339	63352	64009
2014-10-26 20:08:19.825	63311	56348	63368	64011
2014-10-26 20:08:19.829	63288	56350	63363	64016
2014-10-26 20:08:19.835	63282	56354	63335	64060
2014-10-26 20:08:19.839	63288	56352	63329	64084
2014-10-26 20:08:19.845	63285	56348	63332	64102
2014-10-26 20:08:19.849	63302	56358	63317	64094
2014-10-26 20:08:19.855	63290	56363	63307	64063
2014-10-26 20:08:19.859	63286	56361	63292	64070
2014-10-26 20:08:19.865	63299	56368	63285	64055
2014-10-26 20:08:19.869	63286	56364	63289	64039
2014-10-26 20:08:19.875	63293	56358	63308	64009
2014-10-26 20:08:19.880	63301	56361	63300	63975
2014-10-26 20:08:19.884	63309	56357	63286	63976
2014-10-26 20:08:19.890	63290	56357	63309	63963
2014-10-26 20:08:19.894	63276	56366	63304	63980
2014-10-26 20:08:19.900	63309	56368	63303	64011
2014-10-26 20:08:19.904	63295	56356	63325	64046
2014-10-26 20:08:19.910	63292	56370	63317	64065
2014-10-26 20:08:19.914	63299	56380	63317	64036
2014-10-26 20:08:19.920	63291	56365	63320	64050
2014-10-26 20:08:19.924	63318	56373	63332	64065
2014-10-26 20:08:19.930	63300	56369	63340	64080
2014-10-26 20:08:19.934	63279	56372	63314	64110
2014-10-26 20:08:19.940	63300	56381	63309	64119
2014-10-26 20:08:19.944	63298	56371	63316	64124
2014-10-26 20:08:19.950	63304	56380	63327	64101
2014-10-26 20:08:19.954	63307	56385	63343	64078
2014-10-26 20:08:19.960	63295	56379	63329	64044
2014-10-26 20:08:19.964	63306	56364	63312	64011
2014-10-26 20:08:19.970	63311	56359	63307	64013
2014-10-26 20:08:19.974	63313	56381	63315	64006
2014-10-26 20:08:19.980	63317	56376	63324	63985
2014-10-26 20:08:19.984	63317	56375	63318	63969
2014-10-26 20:08:19.990	63318	56388	63308	63995
2014-10-26 20:08:19.994	63313	56378	63304	64024
2014-10-26 20:08:20.000	63312	56381	63301	64056
2014-10-26 20:08:20.005	63310	56384	63301	64112
2014-10-26 20:08:20.009	63310	56379	63313	64107
2014-10-26 20:08:20.015	63315	56393	63325	64099
2014-10-26 20:08:20.019	63316	56394	63340	64100
2014-10-26 20:08:20.025	63322	56378	63356	64049
2014-10-26 20:08:20.029	63326	56381	63354	64043
2014-10-26 20:08:20.035	63324	56384	63354	64050
2014-10-26 20:08:20.039	63315	56380	63363	64033
2014-10-26 20:08:20.045	63326	56371	63367	64058
2014-10-26 20:08:20.049	63343	56375	63352	64103
2014-10-26 20:08:20.055	63311	56392	63336	64111
2014-10-26 20:08:20.059	63303	56391	63325	64084
2014-10-26 20:08:20.065	63323	56387	63318	64096
2014-10-26 20:08:20.069	63324	56384	63331	64097
2014-10-26 20:08:20.075	63330	56379	63323	64068
2014-10-26 20:08:20.079	63307	56386	63313	64085
2014-10-26 20:08:20.085	63297	56401	63315	64079
2014-10-26 20:08:20.089	63325	56387	63299	64038
2014-10-26 20:08:20.095	63329	56374	63300	64007
2014-10-26 20:08:20.099	63304	56388	63319	63993
2014-10-26 20:08:20.105	63301	56396	63340	64004
2014-10-26 20:08:20.109	63334	56411	63327	64021
2014-10-26 20:08:20.115	63329	56394	63313	64024
2014-10-26 20:08:20.119	63309	56375	63336	64022
2014-10-26 20:08:20.125	63323	56386	63335	64029
2014-10-26 20:08:20.130	63330	56382	63325	64032
2014-10-26 20:08:20.134	63320	56398	63336	64065
2014-10-26 20:08:20.140	63318	56396	63334	64090
2014-10-26 20:08:20.144	63324	56385	63325	64096
2014-10-26 20:08:20.150	63328	56398	63331	64147
2014-10-26 20:08:20.154	63331	56387	63322	64169
2014-10-26 20:08:20.160	63324	56380	63334	64162
2014-10-26 20:08:20.164	63317	56392	63346	64129
2014-10-26 20:08:20.170	63331	56393	63325	64090
2014-10-26 20:08:20.174	63334	56397	63348	64117
2014-10-26 20:08:20.180	63317	56404	63347	64095
2014-10-26 20:08:20.184	63333	56399	63322	64059
2014-10-26 20:08:20.190	63329	56398	63324	64030
2014-10-26 20:08:20.194	63300	56397	63309	63984
2014-10-26 20:08:20.200	63328	56385	63318	64010
2014-10-26 20:08:20.204	63325	56386	63321	64029
2014-10-26 20:08:20.210	63310	56390	63316	64031
2014-10-26 20:08:20.214	63331	56400	63319	64037
2014-10-26 20:08:20.220	63314	56393	63300	64013
2014-10-26 20:08:20.224	63322	56380	63313	64037
2014-10-26 20:08:20.230	63339	56398	63338	64076
2014-10-26 20:08:20.234	63324	56387	63336	64092
2014-10-26 20:08:20.240	63336	56377	63332	64119
2014-10-26 20:08:20.244	63336	56398	63342	64123
2014-10-26 20:08:20.250	63329	56387	63327	64116
2014-10-26 20:08:20.255	63334	56384	63308	64107
2014-10-26 20:08:20.259	63315	56405	63334	64098
2014-10-26 20:08:20.265	63315	56400	63350	64089
2014-10-26 20:08:20.269	63333	56399	63348	64065
2014-10-26 20:08:20.275	63329	56406	63329	64067
2014-10-26 20:08:20.279	63331	56399	63321	64074
2014-10-26 20:08:20.285	63332	56395	63335	64069
2014-10-26 20:08:20.289	63324	56391	63337	64061
2014-10-26 20:08:20.295	63325	56391	63353	64064
2014-10-26 20:08:20.299	63331	56395	63354	64077
2014-10-26 20:08:20.305	63336	56402	63339	64065
2014-10-26 20:08:20.309	63328	56408	63337	64054
2014-10-26 20:08:20.315	63314	56390	63344	64054
2014-10-26 20:08:20.319	63313	56394	63346	64053
2014-10-26 20:08:20.325	63329	56415	63333	64047
2014-10-26 20:08:20.329	63335	56406	63341	64055
2014-10-26 20:08:20.335	63316	56396	63350	64088
2014-10-26 20:08:20.339	63314	56405	63346	64113
2014-10-26 20:08:20.345	63335	56411	63329	64129
2014-10-26 20:08:20.349	63335	56393	63308	64108
2014-10-26 20:08:20.355	63330	56402	63307	64067
2014-10-26 20:08:20.359	63330	56423	63309	64045
2014-10-26 20:08:20.365	63328	56399	63304	64041
2014-10-26 20:08:20.369	63325	56404	63298	64051
2014-10-26 20:08:20.375	63323	56416	63309	64056
2014-10-26 20:08:20.380	63318	56406	63303	64076
2014-10-26 20:08:20.384	63325	56411	63297	64103
2014-10-26 20:08:20.390	63326	56397	63322	64082
2014-10-26 20:08:20.394	63319	56397	63318	64052
2014-10-26 20:08:20.400	63338	56410	63311	64046
2014-10-26 20:08:20.404	63334	56396	63320	64066
2014-10-26 20:08:20.410	63321	56409	63330	64096
2014-10-26 20:08:20.414	63324	56412	63342	64115
2014-10-26 20:08:20.420	63328	56404	63340	64147
2014-10-26 20:08:20.424	63346	56418	63346	64143
2014-10-26 20:08:20.430	63336	56407	63339	64098
2014-10-26 20:08:20.434	63316	56407	63318	64078
2014-10-26 20:08:20.440	63323	56408	63323	64054
2014-10-26 20:08:20.444	63321	56390	63339	64041
2014-10-26 20:08:20.450	63322	56401	63349	64023
2014-10-26 20:08:20.454	63327	56401	63330	64009
2014-10-26 20:08:20.460	63324	56397	63317	64052
2014-10-26 20:08:20.464	63336	56409	63324	64073
2014-10-26 20:08:20.470	63323	56405	63322	64070
2014-10-26 20:08:20.474	63314	56408	63327	64087
2014-10-26 20:08:20.480	63330	56407	63323	64088
2014-10-26 20:08:20.484	63334	56404	63301	64075
2014-10-26 20:08:20.490	63327	56420	63308	64078
2014-10-26 20:08:20.494	63321	56409	63330	64088
2014-10-26 20:08:20.500	63325	56404	63326	64086
2014-10-26 20:08:20.505	63340	56424	63321	64094
2014-10-26 20:08:20.509	63333	56420	63312	64089
2014-10-26 20:08:20.515	63308	56393	63305	64055
2014-10-26 20:08:20.519	63322	56392	63302	64054
2014-10-26 20:08:20.525	63340	56413	63296	64083
2014-10-26 20:08:20.529	63321	56406	63301	64099
2014-10-26 20:08:20.535	63311	56415	63304	64099
2014-10-26 20:08:20.539	63312	56424	63306	64106
2014-10-26 20:08:20.545	63326	56409	63321	64092
2014-10-26 20:08:20.549	63334	56417	63326	64053
2014-10-26 20:08:20.555	63313	56418	63326	64034
2014-10-26 20:08:20.559	63313	56416	63317	64012
2014-10-26 20:08:20.565	63325	56418	63314	64012
2014-10-26 20:08:20.569	63323	56406	63327	64051
2014-10-26 20:08:20.575	63319	56398	63319	64070
2014-10-26 20:08:20.579	63310	56397	63325	64067
2014-10-26 20:08:20.585	63313	56414	63343	64079
2014-10-26 20:08:20.589	63335	56425	63343	64083
2014-10-26 20:08:20.595	63329	56419	63328	64069
2014-10-26 20:08:20.599	63302	56420	63308	64069
2014-10-26 20:08:20.605	63320	56421	63309	64077
2014-10-26 20:08:20.609	63345	56419	63300	64096
2014-10-26 20:08:20.615	63329	56417	63294	64110
2014-10-26 20:08:20.619	63323	56420	63307	64110
2014-10-26 20:08:20.625	63323	56420	63299	64105
2014-10-26 20:08:20.630	63319	56415	63301	64091
2014-10-26 20:08:20.634	63315	56424	63306	64102
2014-10-26 20:08:20.640	63302	56429	63311	64096
2014-10-26 20:08:20.644	63317	56412	63318	64075
2014-10-26 20:08:20.650	63332	56415	63296	64080
2014-10-26 20:08:20.654	63308	56427	63297	64063
2014-10-26 20:08:20.660	63305	56419	63309	64034
2014-10-26 20:08:20.664	63317	56417	63309	64024
2014-10-26 20:08:20.670	63312	56415	63314	64011
2014-10-26 20:08:20.674	63320	56415	63313	63995
2014-10-26 20:08:20.680	63311	56412	63314	64027
2014-10-26 20:08:20.684	63304	56413	63303	64057
2014-10-26 20:08:20.690	63321	56428	63302	64051
2014-10-26 20:08:20.694	63307	56414	63304	64086
2014-10-26 20:08:20.700	63320	56410	63301	64109
2014-10-26 20:08:20.704	63324	56423	63319	64110
2014-10-26 20:08:20.710	63310	56413	63314	64102
2014-10-26 20:08:20.714	63329	56405	63312	64049
2014-10-26 20:08:20.720	63314	56418	63320	64032
2014-10-26 20:08:20.724	63301	56420	63309	64081
2014-10-26 20:08:20.730	63305	56415	63296	64136
2014-10-26 20:08:20.734	63304	56419	63279	64140
2014-10-26 20:08:20.740	63311	56411	63273	64116
2014-10-26 20:08:20.744	63300	56411	63273	64081
2014-10-26 20:08:20.750	63304	56418	63283	64032
2014-10-26 20:08:20.755	63324	56411	63290	64020
2014-10-26 20:08:20.759	63316	56418	63290	64018
2014-10-26 20:08:20.765	63316	56420	63291	64014
2014-10-26 20:08:20.769	63308	56412	63292	64020
2014-10-26 20:08:20.775	63298	56420	63301	64029
2014-10-26 20:08:20.779	63322	56418	63294	64025
2014-10-26 20:08:20.785	63315	56410	63298	64029
2014-10-26 20:08:20.789	63299	56422	63308	64054
2014-10-26 20:08:20.795	63317	56416	63307	64059
2014-10-26 20:08:20.799	63307	56407	63316	64084
2014-10-26 20:08:20.805	63286	56427	63296	64116
2014-10-26 20:08:20.809	63307	56424	63282	64109
2014-10-26 20:08:20.815	63321	56415	63284	64101
2014-10-26 20:08:20.819	63306	56425	63273	64086
2014-10-26 20:08:20.825	63299	56409	63278	64056
2014-10-26 20:08:20.829	63301	56411	63281	64046
2014-10-26 20:08:20.835	63307	56434	63268	64060
2014-10-26 20:08:20.839	63306	56428	63266	64049
2014-10-26 20:08:20.845	63291	56420	63285	64029
2014-10-26 20:08:20.849	63294	56421	63293	64037
2014-10-26 20:08:20.855	63311	56410	63285	64053
2014-10-26 20:08:20.859	63316	56406	63294	64058
2014-10-26 20:08:20.865	63305	56422	63303	64057
2014-10-26 20:08:20.869	63294	56421	63295	64040
2014-10-26 20:08:20.875	63297	56414	63293	64018
2014-10-26 20:08:20.880	63305	56421	63311	64048
2014-10-26 20:08:20.884	63300	56414	63320	64095
2014-10-26 20:08:20.890	63299	56403	63305	64114
2014-10-26 20:08:20.894	63301	56412	63291	64116
2014-10-26 20:08:20.900	63301	56425	63283	64094
2014-10-26 20:08:20.904	63318	56417	63273	64085
2014-10-26 20:08:20.910	63307	56412	63265	64090
2014-10-26 20:08:20.914	63293	56427	63278	64084
2014-10-26 20:08:20.920	63296	56430	63271	64062
2014-10-26 20:08:20.924	63284	56420	63254	64026
2014-10-26 20:08:20.930	63304	56423	63275	64022
2014-10-26 20:08:20.934	63304	56425	63259	64020
2014-10-26 20:08:20.940	63283	56404	63244	64023
2014-10-26 20:08:20.944	63306	56410	63270	64048
2014-10-26 20:08:20.950	63312	56417	63265	64044
2014-10-26 20:08:20.954	63295	56397	63259	64028
2014-10-26 20:08:20.960	63302	56411	63290	64012
2014-10-26 20:08:20.964	63306	56417	63309	64006
2014-10-26 20:08:20.970	63293	56402	63282	64028
2014-10-26 20:08:20.974	63300	56415	63258	64051
2014-10-26 20:08:20.980	63296	56411	63256	64064
2014-10-26 20:08:20.984	63291	56404	63265	64060
2014-10-26 20:08:20.990	63304	56412	63276	64053
2014-10-26 20:08:20.994	63288	56414	63269	64045
2014-10-26 20:08:21.000	63284	56416	63287	64047
2014-10-26 20:08:21.005	63304	56416	63293	64069
2014-10-26 20:08:21.009	63290	56414	63273	64086
2014-10-26 20:08:21.015	63282	56409	63284	64099
2014-10-26 20:08:21.019	63303	56410	63295	64109
2014-10-26 20:08:21.025	63293	56413	63292	64107
2014-10-26 20:08:21.029	63285	56416	63290	64094
2014-10-26 20:08:21.035	63293	56420	63296	64071
2014-10-26 20:08:21.039	63296	56409	63282	64067
2014-10-26 20:08:21.045	63300	56403	63266	64040
2014-10-26 20:08:21.049	63299	56416	63279	63970
2014-10-26 20:08:21.055	63295	56408	63271	63946
2014-10-26 20:08:21.059	63280	56392	63248	63956
2014-10-26 20:08:21.065	63280	56409	63227	63944
2014-10-26 20:08:21.069	63289	56409	63233	63962
2014-10-26 20:08:21.075	63280	56398	63259	64005
2014-10-26 20:08:21.079	63284	56402	63241	64057
2014-10-26 20:08:21.085	63286	56399	63232	64116
2014-10-26 20:08:21.089	63286	56406	63249	64141
2014-10-26 20:08:21.095	63284	56394	63251	64146
2014-10-26 20:08:21.099	63273	56398	63255	64125
2014-10-26 20:08:21.105	63282	56419	63258	64081
2014-10-26 20:08:21.109	63293	56397	63264	64057
2014-10-26 20:08:21.115	63297	56389	63273	64050
2014-10-26 20:08:21.119	63288	56405	63271	64039
2014-10-26 20:08:21.125	63278	56410	63270	64025
2014-10-26 20:08:21.130	63288	56408	63289	64028
2014-10-26 20:08:21.134	63287	56398	63290	64031
2014-10-26 20:08:21.140	63282	56414	63267	64012
2014-10-26 20:08:21.144	63275	56406	63268	63986
2014-10-26 20:08:21.150	63278	56386	63273	63989
2014-10-26 20:08:21.154	63290	56410	63288	63985
2014-10-26 20:08:21.160	63278	56414	63282	63982
2014-10-26 20:08:21.164	63272	56408	63250	64026
2014-10-26 20:08:21.170	63284	56408	63250	64052
2014-10-26 20:08:21.174	63288	56405	63254	64069
2014-10-26 20:08:21.180	63291	56406	63270	64076
2014-10-26 20:08:21.184	63273	56390	63259	64053
2014-10-26 20:08:21.190	63269	56393	63230	64035
2014-10-26 20:08:21.194	63282	56412	63253	64029
2014-10-26 20:08:21.200	63284	56409	63265	64043
2014-10-26 20:08:21.204	63285	56396	63260	64057
2014-10-26 20:08:21.210	63271	56391	63260	64067
2014-10-26 20:08:21.214	63287	56388	63252	64070
2014-10-26 20:08:21.220	63292	56387	63242	64060
2014-10-26 20:08:21.224	63266	56384	63236	64050
2014-10-26 20:08:21.230	63276	56384	63231	64038
2014-10-26 20:08:21.234	63288	56395	63231	64022
2014-10-26 20:08:21.240	63287	56389	63251	64032
2014-10-26 20:08:21.244	63267	56384	63265	64048
2014-10-26 20:08:21.250	63260	56388	63276	64030
2014-10-26 20:08:21.255	63281	56380	63271	64012
2014-10-26 20:08:21.259	63272	56379	63265	64020
2014-10-26 20:08:21.265	63265	56381	63280	64030
2014-10-26 20:08:21.269	63274	56376	63274	64020
2014-10-26 20:08:21.275	63269	56376	63261	64012
2014-10-26 20:08:21.279	63273	56384	63257	64007
2014-10-26 20:08:21.285	63271	56384	63249	63993
2014-10-26 20:08:21.289	63265	56379	63245	63996
2014-10-26 20:08:21.295	63281	56388	63235	64018
2014-10-26 20:08:21.299	63288	56383	63236	64027
2014-10-26 20:08:21.305	63264	56368	63257	64018
2014-10-26 20:08:21.309	63250	56375	63259	64021
2014-10-26 20:08:21.315	63273	56376	63255	64020
2014-10-26 20:08:21.319	63273	56373	63255	64013
2014-10-26 20:08:21.325	63265	56368	63254	64030
2014-10-26 20:08:21.329	63276	56361	63247	64027
2014-10-26 20:08:21.335	63254	56371	63232	64031
2014-10-26 20:08:21.339	63255	56377	63237	64064
2014-10-26 20:08:21.345	63282	56381	63231	64081
2014-10-26 20:08:21.349	63277	56379	63224	64082
2014-10-26 20:08:21.355	63268	56377	63242	64059
2014-10-26 20:08:21.359	63254	56381	63255	64025
2014-10-26 20:08:21.365	63261	56362	63253	64004
2014-10-26 20:08:21.369	63271	56358	63247	64008
2014-10-26 20:08:21.375	63262	56377	63236	64033
2014-10-26 20:08:21.380	63263	56372	63233	64028
2014-10-26 20:08:21.384	63254	56355	63251	64016
2014-10-26 20:08:21.390	63252	56364	63266	64031
2014-10-26 20:08:21.394	63270	56367	63278	64027
2014-10-26 20:08:21.400	63264	56365	63275	64010
2014-10-26 20:08:21.404	63251	56371	63266	63999
2014-10-26 20:08:21.410	63241	56372	63269	63994
2014-10-26 20:08:21.414	63248	56376	63249	63999
2014-10-26 20:08:21.420	63273	56363	63240	63983
2014-10-26 20:08:21.424	63259	56366	63239	63955
2014-10-26 20:08:21.430	63250	56371	63225	63959
2014-10-26 20:08:21.434	63260	56350	63231	63973
2014-10-26 20:08:21.440	63257	56362	63225	63976
2014-10-26 20:08:21.444	63270	56377	63216	64022
2014-10-26 20:08:21.450	63260	56366	63231	64067
2014-10-26 20:08:21.454	63247	56356	63238	64068
2014-10-26 20:08:21.460	63262	56357	63238	64069
2014-10-26 20:08:21.464	63255	56365	63238	64063
2014-10-26 20:08:21.470	63243	56357	63246	64054
2014-10-26 20:08:21.474	63251	56349	63247	64046
2014-10-26 20:08:21.480	63270	56356	63231	64040
2014-10-26 20:08:21.484	63259	56359	63224	64035
2014-10-26 20:08:21.490	63240	56362	63234	64010
2014-10-26 20:08:21.494	63252	56356	63250	63979
2014-10-26 20:08:21.500	63247	56357	63257	63970
2014-10-26 20:08:21.505	63249	56368	63264	63980
2014-10-26 20:08:21.509	63249	56354	63276	63998
2014-10-26 20:08:21.515	63240	56358	63287	64002
2014-10-26 20:08:21.519	63260	56366	63285	63993
2014-10-26 20:08:21.525	63258	56351	63266	63986
2014-10-26 20:08:21.529	63226	56347	63254	63968
2014-10-26 20:08:21.535	63240	56342	63249	63970
2014-10-26 20:08:21.539	63265	56352	63251	64009
2014-10-26 20:08:21.545	63251	56361	63259	64029
2014-10-26 20:08:21.549	63247	56349	63237	64017
2014-10-26 20:08:21.555	63254	56351	63221	64014
2014-10-26 20:08:21.559	63242	56355	63243	64022
2014-10-26 20:08:21.565	63236	56349	63248	64006
2014-10-26 20:08:21.569	63240	56351	63242	63969
2014-10-26 20:08:21.575	63229	56354	63245	63985
2014-10-26 20:08:21.579	63230	56342	63225	64005
2014-10-26 20:08:21.585	63258	56339	63208	63983
2014-10-26 20:08:21.589	63243	56342	63225	63989
2014-10-26 20:08:21.595	63235	56348	63227	64005
2014-10-26 20:08:21.599	63248	56352	63225	64011
2014-10-26 20:08:21.605	63234	56348	63221	64028
2014-10-26 20:08:21.609	63242	56351	63206	64034
2014-10-26 20:08:21.615	63238	56341	63235	64012
2014-10-26 20:08:21.619	63227	56344	63256	63996
2014-10-26 20:08:21.625	63243	56354	63235	64002
2014-10-26 20:08:21.630	63245	56340	63231	64007
2014-10-26 20:08:21.634	63224	56341	63235	64008
2014-10-26 20:08:21.640	63226	56349	63238	63997
2014-10-26 20:08:21.644	63248	56339	63246	63983
2014-10-26 20:08:21.650	63244	56332	63243	63990
2014-10-26 20:08:21.654	63243	56343	63250	63977
2014-10-26 20:08:21.660	63238	56354	63262	63948
2014-10-26 20:08:21.664	63234	56345	63246	63936
2014-10-26 20:08:21.670	63247	56336	63237	63949
2014-10-26 20:08:21.674	63235	56332	63235	63977
2014-10-26 20:08:21.680	63237	56332	63225	63999
2014-10-26 20:08:21.684	63246	56334	63232	64030
2014-10-26 20:08:21.690	63232	56339	63241	64050
2014-10-26 20:08:21.694	63229	56347	63238	64036
2014-10-26 20:08:21.700	63237	56330	63229	64001
2014-10-26 20:08:21.704	63241	56331	63231	63978
2014-10-26 20:08:21.710	63238	56350	63255	63978
2014-10-26 20:08:21.714	63234	56327	63261	63971
2014-10-26 20:08:21.720	63226	56322	63255	63985
2014-10-26 20:08:21.724	63228	56336	63248	64016
2014-10-26 20:08:21.730	63241	56340	63242	64041
2014-10-26 20:08:21.734	63226	56339	63247	64056
2014-10-26 20:08:21.740	63216	56328	63225	64036
2014-10-26 20:08:21.744	63239	56328	63224	64012
2014-10-26 20:08:21.750	63241	56331	63247	63992
2014-10-26 20:08:21.755	63223	56333	63248	63980
2014-10-26 20:08:21.759	63227	56338	63254	63962
2014-10-26 20:08:21.765	63240	56333	63250	63933
2014-10-26 20:08:21.769	63226	56336	63237	63928
2014-10-26 20:08:21.775	63230	56345	63230	63927
2014-10-26 20:08:21.779	63239	56329	63233	63940
2014-10-26 20:08:21.785	63223	56324	63248	63966
2014-10-26 20:08:21.789	63234	56337	63252	63964
2014-10-26 20:08:21.795	63233	56330	63247	63971
2014-10-26 20:08:21.799	63222	56322	63257	64002
2014-10-26 20:08:21.805	63237	56332	63268	64026
2014-10-26 20:08:21.809	63233	56325	63257	64052
2014-10-26 20:08:21.815	63228	56312	63229	64063
2014-10-26 20:08:21.819	63223	56332	63201	64047
2014-10-26 20:08:21.825	63217	56339	63211	64049
2014-10-26 20:08:21.829	63226	56329	63226	64028
2014-10-26 20:08:21.835	63235	56330	63207	63990
2014-10-26 20:08:21.839	63237	56331	63197	63975
2014-10-26 20:08:21.845	63222	56333	63191	63949
2014-10-26 20:08:21.849	63223	56331	63195	63945
2014-10-26 20:08:21.855	63236	56331	63215	63962
2014-10-26 20:08:21.859	63234	56324	63227	63961
2014-10-26 20:08:21.865	63236	56320	63237	63939
2014-10-26 20:08:21.869	63222	56319	63237	63923
2014-10-26 20:08:21.875	63218	56322	63238	63955
2014-10-26 20:08:21.880	63236	56333	63256	63996
2014-10-26 20:08:21.884	63227	56320	63271	64017
2014-10-26 20:08:21.890	63227	56310	63264	64028
2014-10-26 20:08:21.894	63229	56309	63253	64010
2014-10-26 20:08:21.900	63226	56318	63246	63990
2014-10-26 20:08:21.904	63232	56314	63251	63964
2014-10-26 20:08:21.910	63223	56309	63263	63941
2014-10-26 20:08:21.914	63228	56323	63253	63954
2014-10-26 20:08:21.920	63235	56301	63247	63958
2014-10-26 20:08:21.924	63238	56317	63234	63965
2014-10-26 20:08:21.930	63232	56331	63218	64001
2014-10-26 20:08:21.934	63221	56306	63236	64034
2014-10-26 20:08:21.940	63236	56330	63243	64045
2014-10-26 20:08:21.944	63231	56323	63235	64043
2014-10-26 20:08:21.950	63220	56307	63238	64060
2014-10-26 20:08:21.954	63220	56320	63241	64061
2014-10-26 20:08:21.960	63230	56310	63244	64046
2014-10-26 20:08:21.964	63241	56316	63245	64017
2014-10-26 20:08:21.970	63221	56327	63255	63968
2014-10-26 20:08:21.974	63211	56318	63272	63942
2014-10-26 20:08:21.980	63218	56316	63268	63940
2014-10-26 20:08:21.984	63239	56332	63247	63956
2014-10-26 20:08:21.990	63242	56326	63239	63944
2014-10-26 20:08:21.994	63216	56313	63237	63925
2014-10-26 20:08:22.000	63225	56319	63241	63924
2014-10-26 20:08:22.005	63234	56318	63252	63915
2014-10-26 20:08:22.009	63226	56322	63258	63919
2014-10-26 20:08:22.015	63224	56315	63255	63929
2014-10-26 20:08:22.019	63221	56303	63233	63967
2014-10-26 20:08:22.025	63224	56316	63225	64015
2014-10-26 20:08:22.029	63220	56319	63230	64047
2014-10-26 20:08:22.035	63203	56319	63234	64070
2014-10-26 20:08:22.039	63214	56321	63246	64056
2014-10-26 20:08:22.045	63241	56318	63249	64035
2014-10-26 20:08:22.049	63244	56320	63241	64043
2014-10-26 20:08:22.055	63228	56313	63235	64031
2014-10-26 20:08:22.059	63220	56318	63234	64004
2014-10-26 20:08:22.065	63233	56321	63237	64004
2014-10-26 20:08:22.069	63228	56314	63228	63987
2014-10-26 20:08:22.075	63217	56315	63211	63950
2014-10-26 20:08:22.079	63232	56314	63216	63953
2014-10-26 20:08:22.085	63225	56319	63215	63973
2014-10-26 20:08:22.089	63221	56318	63208	63949
2014-10-26 20:08:22.095	63231	56310	63236	63955
2014-10-26 20:08:22.099	63231	56317	63250	63987
2014-10-26 20:08:22.105	63232	56321	63253	63968
2014-10-26 20:08:22.109	63224	56315	63268	63973
2014-10-26 20:08:22.115	63226	56321	63261	64001
2014-10-26 20:08:22.119	63238	56320	63261	63997
2014-10-26 20:08:22.125	63239	56308	63269	64006
2014-10-26 20:08:22.130	63232	56311	63266	64020
2014-10-26 20:08:22.134	63230	56313	63268	64024
2014-10-26 20:08:22.140	63235	56316	63265	64012
2014-10-26 20:08:22.144	63228	56324	63257	63988
2014-10-26 20:08:22.150	63228	56320	63252	63974
2014-10-26 20:08:22.154	63237	56317	63252	63961
2014-10-26 20:08:22.160	63234	56312	63262	63960
2014-10-26 20:08:22.164	63223	56316	63266	63968
2014-10-26 20:08:22.170	63224	56330	63258	63984
2014-10-26 20:08:22.174	63241	56329	63251	63993
2014-10-26 20:08:22.180	63238	56320	63241	63985
2014-10-26 20:08:22.184	63226	56320	63225	63982
2014-10-26 20:08:22.190	63232	56321	63219	63971
2014-10-26 20:08:22.194	63230	56315	63232	63970
2014-10-26 20:08:22.200	63238	56309	63236	63995
2014-10-26 20:08:22.204	63248	56316	63222	64031
2014-10-26 20:08:22.210	63237	56326	63231	64051
2014-10-26 20:08:22.214	63232	56323	63244	64047
2014-10-26 20:08:22.220	63243	56318	63247	64013
2014-10-26 20:08:22.224	63239	56315	63246	63950
2014-10-26 20:08:22.230	63227	56316	63247	63948
2014-10-26 20:08:22.234	63230	56314	63273	63979
2014-10-26 20:08:22.240	63247	56309	63280	64000
2014-10-26 20:08:22.244	63244	56318	63278	64020
2014-10-26 20:08:22.250	63231	56326	63289	63993
2014-10-26 20:08:22.255	63243	56315	63293	63960
2014-10-26 20:08:22.259	63235	56321	63276	63947
2014-10-26 20:08:22.265	63237	56335	63264	63967
2014-10-26 20:08:22.269	63243	56324	63268	63992
2014-10-26 20:08:22.275	63237	56314	63244	64000
2014-10-26 20:08:22.279	63251	56322	63239	64032
2014-10-26 20:08:22.285	63242	56333	63246	64037
2014-10-26 20:08:22.289	63240	56325	63238	64036
2014-10-26 20:08:22.295	63239	56326	63249	64032
2014-10-26 20:08:22.299	63227	56327	63252	63996
2014-10-26 20:08:22.305	63238	56313	63258	63968
2014-10-26 20:08:22.309	63241	56325	63245	63935
2014-10-26 20:08:22.315	63250	56326	63230	63927
2014-10-26 20:08:22.319	63252	56314	63247	63946
2014-10-26 20:08:22.325	63232	56318	63244	63969
2014-10-26 20:08:22.329	63228	56322	63242	64000
2014-10-26 20:08:22.335	63241	56328	63252	63998
2014-10-26 20:08:22.339	63246	56320	63257	63993
2014-10-26 20:08:22.345	63238	56324	63271	63999
2014-10-26 20:08:22.349	63234	56328	63271	64006
2014-10-26 20:08:22.355	63231	56319	63263	64026
2014-10-26 20:08:22.359	63227	56325	63268	64039
2014-10-26 20:08:22.365	63239	56324	63277	64040
2014-10-26 20:08:22.369	63252	56333	63280	64045
2014-10-26 20:08:22.375	63244	56341	63267	64066
2014-10-26 20:08:22.380	63228	56335	63272	64048
2014-10-26 20:08:22.384	63227	56323	63281	64002
2014-10-26 20:08:22.390	63243	56312	63270	63983
2014-10-26 20:08:22.394	63254	56333	63274	63939
2014-10-26 20:08:22.400	63256	56331	63281	63903
2014-10-26 20:08:22.404	63246	56330	63279	63912
2014-10-26 20:08:22.410	63244	56333	63261	63909
2014-10-26 20:08:22.414	63255	56330	63270	63923
2014-10-26 20:08:22.420	63244	56347	63287	63954
2014-10-26 20:08:22.424	63248	56330	63265	63981
2014-10-26 20:08:22.430	63267	56331	63263	64027
2014-10-26 20:08:22.434	63263	56334	63272	64059
2014-10-26 20:08:22.440	63261	56328	63273	64070
2014-10-26 20:08:22.444	63249	56339	63279	64075
2014-10-26 20:08:22.450	63231	56321	63266	64081
2014-10-26 20:08:22.454	63248	56341	63264	64083
2014-10-26 20:08:22.460	63262	56349	63288	64058
2014-10-26 20:08:22.464	63241	56329	63290	64054
2014-10-26 20:08:22.470	63234	56337	63281	64052
2014-10-26 20:08:22.474	63246	56332	63284	64011
2014-10-26 20:08:22.480	63251	56324	63281	63978
2014-10-26 20:08:22.484	63257	56337	63283	63950
2014-10-26 20:08:22.490	63241	56349	63268	63939
2014-10-26 20:08:22.494	63239	56343	63258	63940
2014-10-26 20:08:22.500	63263	56343	63269	63946
2014-10-26 20:08:22.505	63257	56349	63274	63961
2014-10-26 20:08:22.509	63245	56336	63281	63969
2014-10-26 20:08:22.515	63246	56335	63273	63971
2014-10-26 20:08:22.519	63254	56340	63263	63957
2014-10-26 20:08:22.525	63270	56337	63263	63949
2014-10-26 20:08:22.529	63262	56342	63258	63973
2014-10-26 20:08:22.535	63247	56350	63253	64012
2014-10-26 20:08:22.539	63254	56357	63257	64031
2014-10-26 20:08:22.545	63261	56352	63264	64037
2014-10-26 20:08:22.549	63256	56344	63276	64058
2014-10-26 20:08:22.555	63255	56349	63302	64098
2014-10-26 20:08:22.559	63252	56334	63304	64129
2014-10-26 20:08:22.565	63248	56327	63289	64129
2014-10-26 20:08:22.569	63257	56341	63289	64101
2014-10-26 20:08:22.575	63264	56341	63284	64037
2014-10-26 20:08:22.579	63257	56341	63280	63979
2014-10-26 20:08:22.585	63251	56337	63297	63936
2014-10-26 20:08:22.589	63253	56336	63294	63905
2014-10-26 20:08:22.595	63257	56351	63278	63927
2014-10-26 20:08:22.599	63256	56342	63284	63952
2014-10-26 20:08:22.605	63264	56339	63285	63949
2014-10-26 20:08:22.609	63272	56358	63278	63955
2014-10-26 20:08:22.615	63250	56358	63270	63955
2014-10-26 20:08:22.619	63251	56361	63284	63958
2014-10-26 20:08:22.625	63272	56352	63288	63997
2014-10-26 20:08:22.630	63261	56339	63281	64033
2014-10-26 20:08:22.634	63259	56344	63298	64042
2014-10-26 20:08:22.640	63247	56338	63295	64063
2014-10-26 20:08:22.644	63251	56345	63307	64096
2014-10-26 20:08:22.650	63265	56358	63321	64103
2014-10-26 20:08:22.654	63252	56347	63316	64105
2014-10-26 20:08:22.660	63272	56350	63305	64095
2014-10-26 20:08:22.664	63264	56351	63291	64038
2014-10-26 20:08:22.670	63259	56341	63292	63994
2014-10-26 20:08:22.674	63277	56345	63283	63987
2014-10-26 20:08:22.680	63258	56342	63285	63979
2014-10-26 20:08:22.684	63258	56334	63293	63964
2014-10-26 20:08:22.690	63261	56341	63281	63952
2014-10-26 20:08:22.694	63265	56344	63273	63948
2014-10-26 20:08:22.700	63281	56355	63255	63951
2014-10-26 20:08:22.704	63272	56353	63250	63948
2014-10-26 20:08:22.710	63260	56331	63266	63928
2014-10-26 20:08:22.714	63256	56355	63279	63921
2014-10-26 20:08:22.720	63266	56353	63282	63966
2014-10-26 20:08:22.724	63258	56336	63272	64006
2014-10-26 20:08:22.730	63258	56355	63277	64026
2014-10-26 20:08:22.734	63268	56341	63282	64076
2014-10-26 20:08:22.740	63251	56342	63279	64106
2014-10-26 20:08:22.744	63267	56358	63295	64092
2014-10-26 20:08:22.750	63278	56346	63304	64096
2014-10-26 20:08:22.755	63254	56355	63305	64098
2014-10-26 20:08:22.759	63261	56350	63304	64085
2014-10-26 20:08:22.765	63276	56333	63294	64077
2014-10-26 20:08:22.769	63277	56360	63288	64042
2014-10-26 20:08:22.775	63261	56361	63305	64027
2014-10-26 20:08:22.779	63260	56353	63334	64028
2014-10-26 20:08:22.785	63278	56366	63330	64010
2014-10-26 20:08:22.789	63267	56347	63317	63991
2014-10-26 20:08:22.795	63273	56350	63311	63937
2014-10-26 20:08:22.799	63280	56356	63300	63913
2014-10-26 20:08:22.805	63269	56353	63302	63929
2014-10-26 20:08:22.809	63285	56355	63300	63942
2014-10-26 20:08:22.815	63270	56339	63314	63979
2014-10-26 20:08:22.819	63255	56355	63311	64012
2014-10-26 20:08:22.825	63285	56370	63295	64031
2014-10-26 20:08:22.829	63271	56348	63303	64056
2014-10-26 20:08:22.835	63268	56350	63295	64083
2014-10-26 20:08:22.839	63283	56358	63307	64102
2014-10-26 20:08:22.845	63263	56346	63322	64116
2014-10-26 20:08:22.849	63265	56349	63315	64100
2014-10-26 20:08:22.855	63284	56360	63325	64077
2014-10-26 20:08:22.859	63272	56351	63317	64083
2014-10-26 20:08:22.865	63270	56350	63297	64066
2014-10-26 20:08:22.869	63280	56354	63308	64027
2014-10-26 20:08:22.875	63268	56346	63324	63991
2014-10-26 20:08:22.880	63266	56349	63314	63956
2014-10-26 20:08:22.884	63278	56349	63314	63923
2014-10-26 20:08:22.890	63290	56352	63299	63912
2014-10-26 20:08:22.894	63284	56351	63279	63928
2014-10-26 20:08:22.900	63279	56342	63283	63949
2014-10-26 20:08:22.904	63289	56361	63292	63995
2014-10-26 20:08:22.910	63273	56360	63304	64024
2014-10-26 20:08:22.914	63280	56350	63295	64031
2014-10-26 20:08:22.920	63285	56359	63293	64063
2014-10-26 20:08:22.924	63279	56351	63306	64095
2014-10-26 20:08:22.930	63303	56358	63325	64118
2014-10-26 20:08:22.934	63284	56374	63335	64112
2014-10-26 20:08:22.940	63283	56361	63316	64092
2014-10-26 20:08:22.944	63305	56352	63302	64076
2014-10-26 20:08:22.950	63286	56357	63298	64061
2014-10-26 20:08:22.954	63287	56361	63294	64058
2014-10-26 20:08:22.960	63276	56365	63284	64025
2014-10-26 20:08:22.964	63264	56361	63286	64001
2014-10-26 20:08:22.970	63278	56346	63299	64021
2014-10-26 20:08:22.974	63292	56354	63297	64009
2014-10-26 20:08:22.980	63305	56368	63299	63969
2014-10-26 20:08:22.984	63282	56352	63304	63965
2014-10-26 20:08:22.990	63271	56361	63319	63988
2014-10-26 20:08:22.994	63295	56366	63329	64005
2014-10-26 20:08:23.000	63291	56344	63328	64023
2014-10-26 20:08:23.005	63275	56350	63337	64025
2014-10-26 20:08:23.009	63282	56363	63341	64034
2014-10-26 20:08:23.015	63298	56353	63349	64071
2014-10-26 20:08:23.019	63296	56353	63353	64095
2014-10-26 20:08:23.025	63291	56368	63341	64099
2014-10-26 20:08:23.029	63293	56354	63327	64094
2014-10-26 20:08:23.035	63294	56356	63317	64086
2014-10-26 20:08:23.039	63301	56373	63310	64068
2014-10-26 20:08:23.045	63301	56353	63314	64061
2014-10-26 20:08:23.049	63294	56351	63335	64063
2014-10-26 20:08:23.055	63286	56361	63324	64025
2014-10-26 20:08:23.059	63290	56371	63308	63997
2014-10-26 20:08:23.065	63309	56379	63316	63991
2014-10-26 20:08:23.069	63289	56358	63315	63969
2014-10-26 20:08:23.075	63285	56373	63313	63968
2014-10-26 20:08:23.079	63305	56375	63319	63983
2014-10-26 20:08:23.085	63292	56357	63336	64000
2014-10-26 20:08:23.089	63302	56376	63331	64025
2014-10-26 20:08:23.095	63299	56372	63321	64051
2014-10-26 20:08:23.099	63287	56371	63332	64076
2014-10-26 20:08:23.105	63307	56373	63305	64081
2014-10-26 20:08:23.109	63295	56366	63298	64077
2014-10-26 20:08:23.115	63292	56370	63326	64083
2014-10-26 20:08:23.119	63297	56353	63309	64087
2014-10-26 20:08:23.125	63294	56352	63311	64094
2014-10-26 20:08:23.130	63306	56370	63333	64114
2014-10-26 20:08:23.134	63300	56366	63332	64115
2014-10-26 20:08:23.140	63292	56368	63338	64077
2014-10-26 20:08:23.144	63290	56367	63335	64040
2014-10-26 20:08:23.150	63303	56373	63330	64041
2014-10-26 20:08:23.154	63315	56370	63336	64050
2014-10-26 20:08:23.160	63311	56352	63329	64037
2014-10-26 20:08:23.164	63310	56375	63330	64021
2014-10-26 20:08:23.170	63297	56376	63348	64008
2014-10-26 20:08:23.174	63299	56366	63339	63993
2014-10-26 20:08:23.180	63306	56381	63321	63987
2014-10-26 20:08:23.184	63298	56368	63323	63992
2014-10-26 20:08:23.190	63297	56367	63314	63998
2014-10-26 20:08:23.194	63303	56369	63316	64025
2014-10-26 20:08:23.200	63301	56361	63324	64073
2014-10-26 20:08:23.204	63305	56371	63307	64079
2014-10-26 20:08:23.210	63316	56368	63303	64075
2014-10-26 20:08:23.214	63301	56363	63304	64104
2014-10-26 20:08:23.220	63298	56368	63323	64117
2014-10-26 20:08:23.224	63307	56370	63331	64126
2014-10-26 20:08:23.230	63314	56358	63318	64132
2014-10-26 20:08:23.234	63315	56355	63329	64108
2014-10-26 20:08:23.240	63301	56372	63319	64083
2014-10-26 20:08:23.244	63318	56370	63325	64041
2014-10-26 20:08:23.250	63311	56359	63347	63999
2014-10-26 20:08:23.255	63291	56368	63349	63995
2014-10-26 20:08:23.259	63310	56375	63353	63995
2014-10-26 20:08:23.265	63308	56370	63339	64009
2014-10-26 20:08:23.269	63304	56373	63331	64029
2014-10-26 20:08:23.275	63304	56360	63331	64053
2014-10-26 20:08:23.279	63300	56358	63337	64085
2014-10-26 20:08:23.285	63310	56373	63339	64082
2014-10-26 20:08:23.289	63310	56362	63334	64062
2014-10-26 20:08:23.295	63291	56362	63346	64006
2014-10-26 20:08:23.299	63299	56361	63332	63962
2014-10-26 20:08:23.305	63327	56362	63323	63998
2014-10-26 20:08:23.309	63307	56374	63337	64026
2014-10-26 20:08:23.315	63295	56372	63333	64070
2014-10-26 20:08:23.319	63324	56373	63338	64110
2014-10-26 20:08:23.325	63322	56368	63341	64107
2014-10-26 20:08:23.329	63316	56366	63339	64123
2014-10-26 20:08:23.335	63317	56363	63338	64117
2014-10-26 20:08:23.339	63295	56363	63319	64101
2014-10-26 20:08:23.345	63302	56379	63325	64103
2014-10-26 20:08:23.349	63325	56371	63338	64099
2014-10-26 20:08:23.355	63323	56364	63318	64091
2014-10-26 20:08:23.359	63300	56371	63333	64052
2014-10-26 20:08:23.365	63296	56359	63342	64017
2014-10-26 20:08:23.369	63317	56364	63334	64008
2014-10-26 20:08:23.375	63309	56363	63350	64013
2014-10-26 20:08:23.380	63305	56361	63332	64037
2014-10-26 20:08:23.384	63306	56379	63321	64042
2014-10-26 20:08:23.390	63306	56377	63335	64024
2014-10-26 20:08:23.394	63317	56383	63339	64010
2014-10-26 20:08:23.400	63305	56378	63353	63998
2014-10-26 20:08:23.404	63299	56364	63347	63995
2014-10-26 20:08:23.410	63311	56370	63342	64020
2014-10-26 20:08:23.414	63310	56359	63342	64058
2014-10-26 20:08:23.420	63307	56365	63333	64074
2014-10-26 20:08:23.424	63313	56374	63347	64096
2014-10-26 20:08:23.430	63298	56366	63349	64105
2014-10-26 20:08:23.434	63287	56370	63333	64083
2014-10-26 20:08:23.440	63312	56365	63323	64079
2014-10-26 20:08:23.444	63307	56364	63314	64069
2014-10-26 20:08:23.450	63293	56370	63332	64057
2014-10-26 20:08:23.454	63291	56363	63350	64068
2014-10-26 20:08:23.460	63297	56366	63360	64070
2014-10-26 20:08:23.464	63310	56367	63353	64063
2014-10-26 20:08:23.470	63289	56363	63330	64047
2014-10-26 20:08:23.474	63284	56373	63332	64037
2014-10-26 20:08:23.480	63304	56370	63316	64020
2014-10-26 20:08:23.484	63298	56358	63289	64010
2014-10-26 20:08:23.490	63306	56365	63307	64044
2014-10-26 20:08:23.494	63314	56364	63320	64059
2014-10-26 20:08:23.500	63297	56367	63324	64050
2014-10-26 20:08:23.505	63294	56376	63326	64063
2014-10-26 20:08:23.509	63299	56361	63316	64056
2014-10-26 20:08:23.515	63292	56357	63328	64057
2014-10-26 20:08:23.519	63298	56371	63326	64080
2014-10-26 20:08:23.525	63299	56364	63308	64070
2014-10-26 20:08:23.529	63285	56361	63311	64026
2014-10-26 20:08:23.535	63291	56367	63311	64005
2014-10-26 20:08:23.539	63301	56367	63311	64019
2014-10-26 20:08:23.545	63292	56364	63311	64033
2014-10-26 20:08:23.549	63294	56366	63303	64039
2014-10-26 20:08:23.555	63304	56368	63305	64043
2014-10-26 20:08:23.559	63304	56355	63322	64045
2014-10-26 20:08:23.565	63304	56361	63317	64053
2014-10-26 20:08:23.569	63299	56370	63302	64066
2014-10-26 20:08:23.575	63290	56366	63313	64071
2014-10-26 20:08:23.579	63280	56372	63306	64055
2014-10-26 20:08:23.585	63285	56364	63317	64019
2014-10-26 20:08:23.589	63300	56355	63349	64001
2014-10-26 20:08:23.595	63278	56366	63333	64020
2014-10-26 20:08:23.599	63275	56367	63323	64033
2014-10-26 20:08:23.605	63295	56361	63327	64046
2014-10-26 20:08:23.609	63280	56353	63321	64055
2014-10-26 20:08:23.615	63281	56357	63325	64060
2014-10-26 20:08:23.619	63287	56357	63333	64076
2014-10-26 20:08:23.625	63277	56357	63332	64064
2014-10-26 20:08:23.630	63283	56368	63327	64045
2014-10-26 20:08:23.634	63287	56364	63336	64040
2014-10-26 20:08:23.640	63283	56354	63323	64026
2014-10-26 20:08:23.644	63273	56350	63297	64023
2014-10-26 20:08:23.650	63272	56351	63297	64021
2014-10-26 20:08:23.654	63282	56349	63306	63992
2014-10-26 20:08:23.660	63288	56356	63320	63969
2014-10-26 20:08:23.664	63281	56359	63314	63982
2014-10-26 20:08:23.670	63266	56358	63308	64020
2014-10-26 20:08:23.674	63275	56360	63300	64053
2014-10-26 20:08:23.680	63281	56348	63268	64068
2014-10-26 20:08:23.684	63267	56348	63286	64084
2014-10-26 20:08:23.690	63277	56350	63321	64093
2014-10-26 20:08:23.694	63283	56344	63308	64078
2014-10-26 20:08:23.700	63273	56353	63300	64055
2014-10-26 20:08:23.704	63276	56355	63301	64024
2014-10-26 20:08:23.710	63277	56341	63298	64006
2014-10-26 20:08:23.714	63276	56343	63295	64031
2014-10-26 20:08:23.720	63280	56355	63303	64039
2014-10-26 20:08:23.724	63272	56352	63324	64025
2014-10-26 20:08:23.730	63273	56353	63318	64028
2014-10-26 20:08:23.734	63284	56353	63290	64010
2014-10-26 20:08:23.740	63273	56351	63273	64011
2014-10-26 20:08:23.744	63272	56349	63273	64043
2014-10-26 20:08:23.750	63271	56344	63303	64059
2014-10-26 20:08:23.755	63274	56353	63307	64064
2014-10-26 20:08:23.759	63274	56352	63278	64052
2014-10-26 20:08:23.765	63264	56337	63279	64019
2014-10-26 20:08:23.769	63280	56339	63274	63981
2014-10-26 20:08:23.775	63271	56342	63283	63969
2014-10-26 20:08:23.779	63260	56340	63311	63973
2014-10-26 20:08:23.785	63274	56338	63304	64001
2014-10-26 20:08:23.789	63261	56337	63299	64032
2014-10-26 20:08:23.795	63268	56342	63295	64031
2014-10-26 20:08:23.799	63270	56348	63284	64049
2014-10-26 20:08:23.805	63247	56335	63289	64052
2014-10-26 20:08:23.809	63252	56335	63300	64027
2014-10-26 20:08:23.815	63261	56343	63285	64020
2014-10-26 20:08:23.819	63263	56319	63263	64017
2014-10-26 20:08:23.825	63260	56330	63275	64008
2014-10-26 20:08:23.829	63260	56347	63284	63994
2014-10-26 20:08:23.835	63265	56330	63286	63996
2014-10-26 20:08:23.839	63257	56336	63294	64011
2014-10-26 20:08:23.845	63252	56326	63293	64026
2014-10-26 20:08:23.849	63254	56313	63280	64024
2014-10-26 20:08:23.855	63251	56327	63272	64027
2014-10-26 20:08:23.859	63255	56331	63281	64051
2014-10-26 20:08:23.865	63247	56315	63274	64023
2014-10-26 20:08:23.869	63252	56324	63269	63997
2014-10-26 20:08:23.875	63266	56339	63300	64006
2014-10-26 20:08:23.880	63250	56338	63295	63985
2014-10-26 20:08:23.884	63238	56347	63271	63991
2014-10-26 20:08:23.890	63238	56335	63284	64005
2014-10-26 20:08:23.894	63249	56329	63299	64010
2014-10-26 20:08:23.900	63266	56326	63295	64030
2014-10-26 20:08:23.904	63250	56317	63282	64042
2014-10-26 20:08:23.910	63237	56341	63276	64045
2014-10-26 20:08:23.914	63246	56336	63270	64011
2014-10-26 20:08:23.920	63258	56321	63256	63997
2014-10-26 20:08:23.924	63259	56329	63252	64005
2014-10-26 20:08:23.930	63237	56332	63251	63975
2014-10-26 20:08:23.934	63239	56330	63246	63970
2014-10-26 20:08:23.940	63245	56322	63235	63976
2014-10-26 20:08:23.944	63237	56319	63244	63995
2014-10-26 20:08:23.950	63242	56317	63261	64007
2014-10-26 20:08:23.954	63244	56321	63254	63999
2014-10-26 20:08:23.960	63244	56321	63257	64004
2014-10-26 20:08:23.964	63236	56323	63271	64004
2014-10-26 20:08:23.970	63241	56330	63275	64030
2014-10-26 20:08:23.974	63245	56303	63287	64051
2014-10-26 20:08:23.980	63215	56305	63296	64059
2014-10-26 20:08:23.984	63225	56312	63287	64067
2014-10-26 20:08:23.990	63244	56307	63272	64043
2014-10-26 20:08:23.994	63230	56324	63259	64010
2014-10-26 20:08:24.000	63237	56316	63266	63980
2014-10-26 20:08:24.005	63227	56313	63275	63973
2014-10-26 20:08:24.009	63230	56314	63254	63961
2014-10-26 20:08:24.015	63245	56300	63240	63938
2014-10-26 20:08:24.019	63226	56292	63258	63940
2014-10-26 20:08:24.025	63232	56307	63280	63941
2014-10-26 20:08:24.029	63241	56314	63284	63948
2014-10-26 20:08:24.035	63232	56292	63278	63965
2014-10-26 20:08:24.039	63218	56294	63275	63987
2014-10-26 20:08:24.045	63217	56307	63274	64000
2014-10-26 20:08:24.049	63234	56309	63264	64001
2014-10-26 20:08:24.055	63217	56305	63260	64016
2014-10-26 20:08:24.059	63212	56297	63259	64009
2014-10-26 20:08:24.065	63231	56293	63228	64003
2014-10-26 20:08:24.069	63224	56297	63201	64005
2014-10-26 20:08:24.075	63220	56302	63203	63997
2014-10-26 20:08:24.079	63223	56294	63217	64005
2014-10-26 20:08:24.085	63226	56294	63218	64012
2014-10-26 20:08:24.089	63224	56307	63219	64023
2014-10-26 20:08:24.095	63210	56300	63233	64032
2014-10-26 20:08:24.099	63214	56291	63214	64017
2014-10-26 20:08:24.105	63213	56293	63216	63994
2014-10-26 20:08:24.109	63214	56290	63240	63939
2014-10-26 20:08:24.115	63225	56297	63245	63888
2014-10-26 20:08:24.119	63214	56299	63247	63904
2014-10-26 20:08:24.125	63219	56297	63237	63948
2014-10-26 20:08:24.130	63220	56292	63248	63969
2014-10-26 20:08:24.134	63209	56273	63256	63958
2014-10-26 20:08:24.140	63211	56287	63247	63936
2014-10-26 20:08:24.144	63202	56297	63263	63926
2014-10-26 20:08:24.150	63217	56288	63261	63931
2014-10-26 20:08:24.154	63223	56282	63224	63933
2014-10-26 20:08:24.160	63197	56268	63219	63953
2014-10-26 20:08:24.164	63204	56281	63220	63980
2014-10-26 20:08:24.170	63212	56289	63208	64003
2014-10-26 20:08:24.174	63210	56276	63228	64025
2014-10-26 20:08:24.180	63212	56273	63229	64032
2014-10-26 20:08:24.184	63188	56273	63233	64040
2014-10-26 20:08:24.190	63199	56276	63243	64013
2014-10-26 20:08:24.194	63216	56281	63223	63990
2014-10-26 20:08:24.200	63189	56285	63234	63993
2014-10-26 20:08:24.204	63186	56278	63220	63989
2014-10-26 20:08:24.210	63200	56273	63212	64005
2014-10-26 20:08:24.214	63210	56273	63237	63984
2014-10-26 20:08:24.220	63203	56269	63225	63946
2014-10-26 20:08:24.224	63186	56271	63227	63922
2014-10-26 20:08:24.230	63186	56268	63233	63892
2014-10-26 20:08:24.234	63174	56264	63225	63913
2014-10-26 20:08:24.240	63177	56272	63218	63946
2014-10-26 20:08:24.244	63205	56276	63206	63929
2014-10-26 20:08:24.250	63189	56280	63210	63886
2014-10-26 20:08:24.255	63175	56273	63215	63856
2014-10-26 20:08:24.259	63205	56260	63204	63868
2014-10-26 20:08:24.265	63196	56270	63207	63881
2014-10-26 20:08:24.269	63187	56270	63212	63896
2014-10-26 20:08:24.275	63194	56262	63205	63960
2014-10-26 20:08:24.279	63185	56269	63200	64024
2014-10-26 20:08:24.285	63200	56264	63211	64069
2014-10-26 20:08:24.289	63197	56249	63213	64095
2014-10-26 20:08:24.295	63184	56249	63207	64086
2014-10-26 20:08:24.299	63185	56257	63218	64055
2014-10-26 20:08:24.305	63185	56257	63209	64010
2014-10-26 20:08:24.309	63183	56238	63198	63955
2014-10-26 20:08:24.315	63174	56249	63205	63931
2014-10-26 20:08:24.319	63185	56270	63195	63933
2014-10-26 20:08:24.325	63186	56253	63195	63912
2014-10-26 20:08:24.329	63172	56256	63208	63914
2014-10-26 20:08:24.335	63181	56258	63205	63916
2014-10-26 20:08:24.339	63173	56242	63210	63877
2014-10-26 20:08:24.345	63176	56236	63227	63854
2014-10-26 20:08:24.349	63184	56246	63219	63841
2014-10-26 20:08:24.355	63159	56252	63204	63851
2014-10-26 20:08:24.359	63174	56232	63206	63884
2014-10-26 20:08:24.365	63179	56236	63195	63915
2014-10-26 20:08:24.369	63162	56251	63186	63943
2014-10-26 20:08:24.375	63183	56242	63183	63959
2014-10-26 20:08:24.380	63177	56231	63199	63961
2014-10-26 20:08:24.384	63175	56241	63207	63950
2014-10-26 20:08:24.390	63168	56256	63194	63961
2014-10-26 20:08:24.394	63158	56234	63204	63955
2014-10-26 20:08:24.400	63171	56222	63175	63938
2014-10-26 20:08:24.404	63155	56235	63156	63984
2014-10-26 20:08:24.410	63158	56231	63184	64016
2014-10-26 20:08:24.414	63153	56235	63185	64023
2014-10-26 20:08:24.420	63145	56239	63175	63999
2014-10-26 20:08:24.424	63170	56216	63165	63938
2014-10-26 20:08:24.430	63158	56215	63175	63895
2014-10-26 20:08:24.434	63151	56230	63193	63860
2014-10-26 20:08:24.440	63157	56217	63193	63849
2014-10-26 20:08:24.444	63148	56214	63187	63852
2014-10-26 20:08:24.450	63144	56224	63175	63860
2014-10-26 20:08:24.454	63136	56234	63171	63873
2014-10-26 20:08:24.460	63154	56219	63165	63886
2014-10-26 20:08:24.464	63162	56215	63164	63906
2014-10-26 20:08:24.470	63146	56223	63169	63900
2014-10-26 20:08:24.474	63140	56206	63156	63892
2014-10-26 20:08:24.480	63135	56227	63149	63906
2014-10-26 20:08:24.484	63147	56231	63165	63932
2014-10-26 20:08:24.490	63148	56202	63183	63976
2014-10-26 20:08:24.494	63137	56209	63190	63989
2014-10-26 20:08:24.500	63140	56219	63179	63990
2014-10-26 20:08:24.505	63147	56211	63189	63950
2014-10-26 20:08:24.509	63148	56209	63197	63885
2014-10-26 20:08:24.515	63140	56208	63186	63900
2014-10-26 20:08:24.519	63136	56203	63186	63905
2014-10-26 20:08:24.525	63141	56208	63193	63907
2014-10-26 20:08:24.529	63142	56208	63194	63935
2014-10-26 20:08:24.535	63127	56209	63171	63929
2014-10-26 20:08:24.539	63123	56208	63178	63926
2014-10-26 20:08:24.545	63127	56205	63197	63883
2014-10-26 20:08:24.549	63123	56210	63177	63856
2014-10-26 20:08:24.555	63140	56204	63164	63851
2014-10-26 20:08:24.559	63139	56213	63153	63856
2014-10-26 20:08:24.565	63122	56220	63158	63883
2014-10-26 20:08:24.569	63130	56203	63172	63858
2014-10-26 20:08:24.575	63139	56196	63150	63882
2014-10-26 20:08:24.579	63133	56197	63139	63904
2014-10-26 20:08:24.585	63122	56197	63150	63877
2014-10-26 20:08:24.589	63119	56191	63156	63891
2014-10-26 20:08:24.595	63128	56182	63157	63877
2014-10-26 20:08:24.599	63130	56194	63142	63882
2014-10-26 20:08:24.605	63128	56204	63144	63920
2014-10-26 20:08:24.609	63125	56188	63172	63932
2014-10-26 20:08:24.615	63122	56189	63165	63960
2014-10-26 20:08:24.619	63119	56203	63148	63961
2014-10-26 20:08:24.625	63112	56189	63161	63933
2014-10-26 20:08:24.630	63127	56186	63175	63912
2014-10-26 20:08:24.634	63141	56182	63176	63879
2014-10-26 20:08:24.640	63110	56171	63161	63852
2014-10-26 20:08:24.644	63113	56184	63156	63851
2014-10-26 20:08:24.650	63132	56181	63176	63867
2014-10-26 20:08:24.654	63120	56173	63168	63886
2014-10-26 20:08:24.660	63110	56180	63160	63875
2014-10-26 20:08:24.664	63098	56187	63171	63850
2014-10-26 20:08:24.670	63120	56175	63173	63857
2014-10-26 20:08:24.674	63133	56160	63183	63847
2014-10-26 20:08:24.680	63104	56175	63187	63837
2014-10-26 20:08:24.684	63100	56186	63171	63855
2014-10-26 20:08:24.690	63115	56182	63153	63854
2014-10-26 20:08:24.694	63121	56165	63159	63894
2014-10-26 20:08:24.700	63100	56165	63172	63952
2014-10-26 20:08:24.704	63089	56177	63168	63956
2014-10-26 20:08:24.710	63115	56159	63159	63955
2014-10-26 20:08:24.714	63108	56165	63153	63929
2014-10-26 20:08:24.720	63095	56178	63140	63885
2014-10-26 20:08:24.724	63097	56169	63122	63870
2014-10-26 20:08:24.730	63098	56170	63129	63854
2014-10-26 20:08:24.734	63119	56173	63143	63845
2014-10-26 20:08:24.740	63116	56170	63147	63837
2014-10-26 20:08:24.744	63104	56163	63160	63810
2014-10-26 20:08:24.750	63104	56156	63176	63822
2014-10-26 20:08:24.755	63095	56159	63179	63854
2014-10-26 20:08:24.759	63100	56160	63176	63879
2014-10-26 20:08:24.765	63104	56162	63178	63888
2014-10-26 20:08:24.769	63091	56161	63168	63905
2014-10-26 20:08:24.775	63090	56152	63162	63931
2014-10-26 20:08:24.779	63097	56153	63173	63886
2014-10-26 20:08:24.785	63101	56155	63153	63856
2014-10-26 20:08:24.789	63102	56159	63136	63855
2014-10-26 20:08:24.795	63098	56161	63147	63832
2014-10-26 20:08:24.799	63101	56149	63127	63849
2014-10-26 20:08:24.805	63090	56141	63114	63847
2014-10-26 20:08:24.809	63085	56146	63119	63854
2014-10-26 20:08:24.815	63090	56149	63105	63894
2014-10-26 20:08:24.819	63090	56152	63115	63897
2014-10-26 20:08:24.825	63100	56164	63108	63901
2014-10-26 20:08:24.829	63095	56147	63103	63880
2014-10-26 20:08:24.835	63083	56130	63138	63842
2014-10-26 20:08:24.839	63084	56153	63133	63845
2014-10-26 20:08:24.845	63090	56155	63129	63875
2014-10-26 20:08:24.849	63100	56141	63147	63917
2014-10-26 20:08:24.855	63102	56146	63155	63928
2014-10-26 20:08:24.859	63090	56138	63166	63907
2014-10-26 20:08:24.865	63089	56126	63158	63871
2014-10-26 20:08:24.869	63094	56127	63162	63818
2014-10-26 20:08:24.875	63092	56139	63174	63774
2014-10-26 20:08:24.880	63092	56142	63158	63742
2014-10-26 20:08:24.884	63103	56135	63145	63768
2014-10-26 20:08:24.890	63096	56149	63151	63820
2014-10-26 20:08:24.894	63079	56150	63156	63856
2014-10-26 20:08:24.900	63080	56144	63148	63896
2014-10-26 20:08:24.904	63082	56145	63140	63900
2014-10-26 20:08:24.910	63084	56138	63141	63884
2014-10-26 20:08:24.914	63089	56142	63138	63856
2014-10-26 20:08:24.920	63087	56136	63139	63838
2014-10-26 20:08:24.924	63088	56143	63143	63851
2014-10-26 20:08:24.930	63084	56150	63132	63867
2014-10-26 20:08:24.934	63072	56137	63125	63903
2014-10-26 20:08:24.940	63078	56145	63132	63917
2014-10-26 20:08:24.944	63086	56131	63132	63901
2014-10-26 20:08:24.950	63094	56124	63129	63886
2014-10-26 20:08:24.954	63100	56132	63137	63861
2014-10-26 20:08:24.960	63087	56124	63137	63860
2014-10-26 20:08:24.964	63077	56132	63130	63854
2014-10-26 20:08:24.970	63070	56135	63137	63832
2014-10-26 20:08:24.974	63084	56141	63131	63840
2014-10-26 20:08:24.980	63106	56135	63127	63846
2014-10-26 20:08:24.984	63094	56121	63138	63853
2014-10-26 20:08:24.990	63078	56130	63143	63841
2014-10-26 20:08:24.994	63073	56134	63149	63810
[truncated: 10,400 more rows]
