# Supplementary material for: Seismic monitoring of small alpine rockfalls – validity, precision and limitations
Source: Copernicus journal article supplement (doi:10.5194/esurf-5-653-2017), 2017-10-16
Supplement: Supplementary file 2 [file esurf-5-653-2017-supplement.zip › event_9.txt]

Time	LAU02	LAU03	LAU04	LAU05
2014-10-17 00:08:55.005	61188	61409	62897	64606
2014-10-17 00:08:55.009	61184	61425	62894	64611
2014-10-17 00:08:55.015	61181	61428	62879	64583
2014-10-17 00:08:55.019	61182	61411	62897	64557
2014-10-17 00:08:55.025	61189	61404	62900	64523
2014-10-17 00:08:55.029	61188	61405	62899	64487
2014-10-17 00:08:55.035	61190	61413	62914	64480
2014-10-17 00:08:55.039	61180	61420	62917	64448
2014-10-17 00:08:55.045	61181	61402	62910	64404
2014-10-17 00:08:55.049	61184	61409	62890	64405
2014-10-17 00:08:55.055	61199	61428	62901	64428
2014-10-17 00:08:55.059	61208	61401	62918	64433
2014-10-17 00:08:55.065	61175	61396	62909	64443
2014-10-17 00:08:55.069	61178	61418	62892	64453
2014-10-17 00:08:55.075	61187	61415	62882	64450
2014-10-17 00:08:55.079	61181	61396	62894	64482
2014-10-17 00:08:55.085	61189	61393	62891	64507
2014-10-17 00:08:55.089	61175	61414	62890	64499
2014-10-17 00:08:55.095	61175	61415	62909	64494
2014-10-17 00:08:55.099	61189	61411	62908	64493
2014-10-17 00:08:55.105	61188	61405	62902	64496
2014-10-17 00:08:55.109	61171	61398	62910	64507
2014-10-17 00:08:55.115	61170	61396	62878	64541
2014-10-17 00:08:55.119	61193	61414	62862	64561
2014-10-17 00:08:55.125	61186	61412	62893	64556
2014-10-17 00:08:55.130	61178	61390	62887	64543
2014-10-17 00:08:55.134	61190	61418	62888	64510
2014-10-17 00:08:55.140	61183	61413	62907	64472
2014-10-17 00:08:55.144	61181	61398	62900	64440
2014-10-17 00:08:55.150	61189	61409	62883	64426
2014-10-17 00:08:55.154	61186	61412	62873	64443
2014-10-17 00:08:55.160	61192	61416	62900	64471
2014-10-17 00:08:55.164	61195	61396	62920	64477
2014-10-17 00:08:55.170	61184	61399	62922	64479
2014-10-17 00:08:55.174	61181	61416	62916	64473
2014-10-17 00:08:55.180	61186	61399	62920	64423
2014-10-17 00:08:55.184	61185	61399	62939	64394
2014-10-17 00:08:55.190	61171	61417	62941	64419
2014-10-17 00:08:55.194	61166	61416	62955	64436
2014-10-17 00:08:55.200	61173	61405	62969	64464
2014-10-17 00:08:55.204	61177	61406	62965	64512
2014-10-17 00:08:55.210	61192	61401	62946	64523
2014-10-17 00:08:55.214	61180	61399	62912	64490
2014-10-17 00:08:55.220	61169	61410	62906	64461
2014-10-17 00:08:55.224	61176	61392	62909	64485
2014-10-17 00:08:55.230	61172	61404	62906	64535
2014-10-17 00:08:55.234	61178	61416	62907	64554
2014-10-17 00:08:55.240	61185	61386	62886	64562
2014-10-17 00:08:55.244	61187	61395	62868	64534
2014-10-17 00:08:55.250	61178	61402	62871	64482
2014-10-17 00:08:55.255	61187	61405	62881	64475
2014-10-17 00:08:55.259	61201	61406	62905	64466
2014-10-17 00:08:55.265	61186	61400	62909	64460
2014-10-17 00:08:55.269	61177	61411	62893	64464
2014-10-17 00:08:55.275	61183	61394	62870	64446
2014-10-17 00:08:55.279	61197	61395	62867	64462
2014-10-17 00:08:55.285	61178	61399	62877	64465
2014-10-17 00:08:55.289	61170	61376	62868	64427
2014-10-17 00:08:55.295	61187	61395	62904	64394
2014-10-17 00:08:55.299	61184	61414	62947	64384
2014-10-17 00:08:55.305	61195	61399	62952	64444
2014-10-17 00:08:55.309	61179	61386	62982	64532
2014-10-17 00:08:55.315	61165	61391	62971	64581
2014-10-17 00:08:55.319	61189	61399	62933	64579
2014-10-17 00:08:55.325	61179	61387	62934	64539
2014-10-17 00:08:55.329	61163	61391	62920	64525
2014-10-17 00:08:55.335	61179	61411	62904	64532
2014-10-17 00:08:55.339	61194	61394	62899	64538
2014-10-17 00:08:55.345	61177	61382	62886	64527
2014-10-17 00:08:55.349	61161	61390	62886	64490
2014-10-17 00:08:55.355	61167	61393	62877	64474
2014-10-17 00:08:55.359	61178	61391	62870	64450
2014-10-17 00:08:55.365	61191	61385	62887	64438
2014-10-17 00:08:55.369	61184	61391	62892	64421
2014-10-17 00:08:55.375	61174	61394	62901	64377
2014-10-17 00:08:55.380	61171	61387	62930	64387
2014-10-17 00:08:55.384	61167	61398	62940	64396
2014-10-17 00:08:55.390	61173	61401	62934	64424
2014-10-17 00:08:55.394	61169	61391	62912	64454
2014-10-17 00:08:55.400	61167	61409	62911	64456
2014-10-17 00:08:55.404	61172	61394	62915	64504
2014-10-17 00:08:55.410	61188	61378	62876	64548
2014-10-17 00:08:55.414	61173	61404	62851	64585
2014-10-17 00:08:55.420	61162	61394	62861	64586
2014-10-17 00:08:55.424	61183	61392	62869	64571
2014-10-17 00:08:55.430	61165	61392	62881	64567
2014-10-17 00:08:55.434	61159	61393	62897	64526
2014-10-17 00:08:55.440	61174	61395	62905	64512
2014-10-17 00:08:55.444	61187	61394	62906	64504
2014-10-17 00:08:55.450	61194	61414	62921	64474
2014-10-17 00:08:55.454	61177	61400	62944	64443
2014-10-17 00:08:55.460	61180	61396	62944	64417
2014-10-17 00:08:55.464	61178	61399	62932	64413
2014-10-17 00:08:55.470	61170	61384	62925	64427
2014-10-17 00:08:55.474	61186	61383	62927	64459
2014-10-17 00:08:55.480	61179	61379	62927	64484
2014-10-17 00:08:55.484	61180	61387	62930	64490
2014-10-17 00:08:55.490	61187	61390	62927	64450
2014-10-17 00:08:55.494	61176	61392	62915	64427
2014-10-17 00:08:55.500	61191	61385	62920	64465
2014-10-17 00:08:55.505	61183	61386	62920	64465
2014-10-17 00:08:55.509	61172	61405	62923	64510
2014-10-17 00:08:55.515	61167	61386	62929	64596
2014-10-17 00:08:55.519	61165	61383	62922	64587
2014-10-17 00:08:55.525	61194	61390	62916	64523
2014-10-17 00:08:55.529	61177	61385	62891	64479
2014-10-17 00:08:55.535	61171	61397	62873	64448
2014-10-17 00:08:55.539	61183	61388	62889	64432
2014-10-17 00:08:55.545	61170	61373	62893	64453
2014-10-17 00:08:55.549	61176	61383	62889	64485
2014-10-17 00:08:55.555	61167	61391	62886	64523
2014-10-17 00:08:55.559	61175	61376	62877	64532
2014-10-17 00:08:55.565	61178	61385	62890	64474
2014-10-17 00:08:55.569	61161	61389	62896	64423
2014-10-17 00:08:55.575	61178	61371	62904	64440
2014-10-17 00:08:55.579	61177	61386	62942	64471
2014-10-17 00:08:55.585	61170	61383	62949	64476
2014-10-17 00:08:55.589	61175	61379	62927	64475
2014-10-17 00:08:55.595	61170	61389	62921	64461
2014-10-17 00:08:55.599	61169	61380	62926	64478
2014-10-17 00:08:55.605	61173	61390	62940	64516
2014-10-17 00:08:55.609	61172	61392	62933	64529
2014-10-17 00:08:55.615	61172	61379	62918	64544
2014-10-17 00:08:55.619	61179	61386	62925	64543
2014-10-17 00:08:55.625	61176	61392	62913	64550
2014-10-17 00:08:55.630	61173	61391	62905	64536
2014-10-17 00:08:55.634	61170	61378	62923	64484
2014-10-17 00:08:55.640	61174	61368	62925	64461
2014-10-17 00:08:55.644	61183	61395	62935	64422
2014-10-17 00:08:55.650	61173	61404	62939	64383
2014-10-17 00:08:55.654	61186	61379	62928	64388
2014-10-17 00:08:55.660	61201	61372	62933	64392
2014-10-17 00:08:55.664	61186	61385	62925	64419
2014-10-17 00:08:55.670	61164	61374	62924	64434
2014-10-17 00:08:55.674	61172	61370	62923	64446
2014-10-17 00:08:55.680	61197	61398	62911	64486
2014-10-17 00:08:55.684	61181	61375	62920	64527
2014-10-17 00:08:55.690	61161	61369	62917	64579
2014-10-17 00:08:55.694	61170	61387	62900	64596
2014-10-17 00:08:55.700	61184	61373	62910	64620
2014-10-17 00:08:55.704	61173	61382	62914	64628
2014-10-17 00:08:55.710	61167	61380	62898	64564
2014-10-17 00:08:55.714	61169	61376	62914	64506
2014-10-17 00:08:55.720	61177	61388	62944	64461
2014-10-17 00:08:55.724	61189	61377	62957	64434
2014-10-17 00:08:55.730	61170	61384	62941	64431
2014-10-17 00:08:55.734	61177	61384	62904	64434
2014-10-17 00:08:55.740	61188	61368	62902	64425
2014-10-17 00:08:55.744	61179	61394	62917	64429
2014-10-17 00:08:55.750	61170	61386	62920	64463
2014-10-17 00:08:55.755	61170	61359	62906	64470
2014-10-17 00:08:55.759	61193	61393	62877	64457
2014-10-17 00:08:55.765	61177	61395	62870	64443
2014-10-17 00:08:55.769	61171	61370	62859	64449
2014-10-17 00:08:55.775	61184	61384	62872	64474
2014-10-17 00:08:55.779	61174	61379	62894	64504
2014-10-17 00:08:55.785	61180	61384	62880	64520
2014-10-17 00:08:55.789	61157	61403	62890	64521
2014-10-17 00:08:55.795	61157	61387	62892	64567
2014-10-17 00:08:55.799	61185	61392	62891	64613
2014-10-17 00:08:55.805	61159	61384	62931	64603
2014-10-17 00:08:55.809	61161	61365	62953	64564
2014-10-17 00:08:55.815	61170	61390	62969	64503
2014-10-17 00:08:55.819	61160	61385	62968	64436
2014-10-17 00:08:55.825	61178	61375	62939	64414
2014-10-17 00:08:55.829	61179	61381	62943	64443
2014-10-17 00:08:55.835	61165	61378	62958	64467
2014-10-17 00:08:55.839	61164	61383	62962	64463
2014-10-17 00:08:55.845	61175	61370	62964	64455
2014-10-17 00:08:55.849	61191	61373	62936	64449
2014-10-17 00:08:55.855	61171	61395	62914	64451
2014-10-17 00:08:55.859	61154	61380	62930	64459
2014-10-17 00:08:55.865	61174	61368	62925	64454
2014-10-17 00:08:55.869	61172	61385	62916	64456
2014-10-17 00:08:55.875	61175	61379	62927	64469
2014-10-17 00:08:55.880	61174	61379	62907	64477
2014-10-17 00:08:55.884	61175	61385	62891	64493
2014-10-17 00:08:55.890	61188	61360	62915	64482
2014-10-17 00:08:55.894	61168	61363	62937	64453
2014-10-17 00:08:55.900	61178	61377	62919	64464
2014-10-17 00:08:55.904	61189	61381	62896	64494
2014-10-17 00:08:55.910	61172	61382	62891	64525
2014-10-17 00:08:55.914	61174	61360	62891	64561
2014-10-17 00:08:55.920	61195	61377	62905	64596
2014-10-17 00:08:55.924	61186	61389	62897	64614
2014-10-17 00:08:55.930	61158	61363	62881	64557
2014-10-17 00:08:55.934	61177	61388	62902	64485
2014-10-17 00:08:55.940	61183	61378	62932	64471
2014-10-17 00:08:55.944	61172	61361	62954	64461
2014-10-17 00:08:55.950	61162	61383	62969	64442
2014-10-17 00:08:55.954	61159	61360	62965	64427
2014-10-17 00:08:55.960	61188	61371	62941	64417
2014-10-17 00:08:55.964	61182	61384	62940	64391
2014-10-17 00:08:55.970	61166	61371	62963	64386
2014-10-17 00:08:55.974	61180	61384	62968	64433
2014-10-17 00:08:55.980	61188	61373	62973	64480
2014-10-17 00:08:55.984	61175	61377	62980	64508
2014-10-17 00:08:55.990	61167	61383	62980	64536
2014-10-17 00:08:55.994	61167	61378	62964	64590
2014-10-17 00:08:56.000	61175	61380	62925	64613
2014-10-17 00:08:56.005	61179	61373	62915	64581
2014-10-17 00:08:56.009	61171	61382	62910	64537
2014-10-17 00:08:56.015	61184	61377	62901	64490
2014-10-17 00:08:56.019	61163	61371	62901	64473
2014-10-17 00:08:56.025	61178	61370	62867	64486
2014-10-17 00:08:56.029	61194	61372	62879	64516
2014-10-17 00:08:56.035	61167	61386	62909	64518
2014-10-17 00:08:56.039	61190	61367	62902	64491
2014-10-17 00:08:56.045	61166	61362	62908	64494
2014-10-17 00:08:56.049	61158	61378	62896	64471
2014-10-17 00:08:56.055	61188	61376	62883	64439
2014-10-17 00:08:56.059	61170	61381	62900	64440
2014-10-17 00:08:56.065	61169	61383	62914	64437
2014-10-17 00:08:56.069	61160	61376	62912	64437
2014-10-17 00:08:56.075	61171	61375	62912	64464
2014-10-17 00:08:56.079	61189	61379	62908	64490
2014-10-17 00:08:56.085	61174	61375	62906	64479
2014-10-17 00:08:56.089	61188	61380	62911	64494
2014-10-17 00:08:56.095	61190	61382	62904	64500
2014-10-17 00:08:56.099	61179	61367	62922	64466
2014-10-17 00:08:56.105	61186	61380	62925	64468
2014-10-17 00:08:56.109	61179	61376	62908	64462
2014-10-17 00:08:56.115	61179	61365	62921	64470
2014-10-17 00:08:56.119	61188	61381	62925	64502
2014-10-17 00:08:56.125	61174	61374	62935	64522
2014-10-17 00:08:56.130	61167	61382	62955	64552
2014-10-17 00:08:56.134	61174	61381	62956	64546
2014-10-17 00:08:56.140	61183	61361	62949	64552
2014-10-17 00:08:56.144	61184	61382	62945	64554
2014-10-17 00:08:56.150	61174	61388	62923	64506
2014-10-17 00:08:56.154	61178	61367	62889	64491
2014-10-17 00:08:56.160	61178	61373	62891	64488
2014-10-17 00:08:56.164	61165	61385	62906	64502
2014-10-17 00:08:56.170	61187	61373	62903	64507
2014-10-17 00:08:56.174	61191	61369	62889	64447
2014-10-17 00:08:56.180	61161	61374	62880	64401
2014-10-17 00:08:56.184	61170	61369	62878	64391
2014-10-17 00:08:56.190	61183	61381	62887	64410
2014-10-17 00:08:56.194	61177	61377	62904	64455
2014-10-17 00:08:56.200	61176	61377	62908	64532
2014-10-17 00:08:56.204	61178	61386	62907	64572
2014-10-17 00:08:56.210	61180	61383	62912	64555
2014-10-17 00:08:56.214	61179	61382	62925	64520
2014-10-17 00:08:56.220	61175	61367	62943	64478
2014-10-17 00:08:56.224	61174	61378	62959	64471
2014-10-17 00:08:56.230	61184	61379	62961	64478
2014-10-17 00:08:56.234	61179	61363	62955	64499
2014-10-17 00:08:56.240	61173	61371	62941	64536
2014-10-17 00:08:56.244	61185	61380	62921	64528
2014-10-17 00:08:56.250	61178	61373	62921	64474
2014-10-17 00:08:56.255	61179	61364	62917	64455
2014-10-17 00:08:56.259	61175	61372	62896	64445
2014-10-17 00:08:56.265	61166	61385	62882	64424
2014-10-17 00:08:56.269	61173	61381	62870	64490
2014-10-17 00:08:56.275	61174	61376	62885	64545
2014-10-17 00:08:56.279	61179	61373	62909	64532
2014-10-17 00:08:56.285	61162	61372	62909	64516
2014-10-17 00:08:56.289	61166	61373	62921	64488
2014-10-17 00:08:56.295	61184	61359	62936	64477
2014-10-17 00:08:56.299	61160	61365	62930	64457
2014-10-17 00:08:56.305	61158	61386	62922	64450
2014-10-17 00:08:56.309	61178	61386	62915	64494
2014-10-17 00:08:56.315	61179	61376	62914	64493
2014-10-17 00:08:56.319	61179	61365	62927	64465
2014-10-17 00:08:56.325	61178	61376	62939	64455
2014-10-17 00:08:56.329	61163	61372	62928	64474
2014-10-17 00:08:56.335	61166	61367	62910	64492
2014-10-17 00:08:56.339	61171	61387	62905	64460
2014-10-17 00:08:56.345	61174	61369	62892	64454
2014-10-17 00:08:56.349	61185	61357	62891	64469
2014-10-17 00:08:56.355	61169	61369	62896	64475
2014-10-17 00:08:56.359	61167	61368	62891	64528
2014-10-17 00:08:56.365	61174	61369	62897	64569
2014-10-17 00:08:56.369	61166	61366	62885	64556
2014-10-17 00:08:56.375	61171	61363	62883	64545
2014-10-17 00:08:56.380	61178	61364	62914	64508
2014-10-17 00:08:56.384	61177	61370	62925	64449
2014-10-17 00:08:56.390	61166	61371	62931	64444
2014-10-17 00:08:56.394	61171	61368	62937	64454
2014-10-17 00:08:56.400	61175	61373	62930	64443
2014-10-17 00:08:56.404	61150	61372	62923	64445
2014-10-17 00:08:56.410	61166	61367	62933	64447
2014-10-17 00:08:56.414	61174	61359	62941	64450
2014-10-17 00:08:56.420	61157	61371	62919	64482
2014-10-17 00:08:56.424	61176	61377	62911	64529
2014-10-17 00:08:56.430	61155	61363	62920	64555
2014-10-17 00:08:56.434	61144	61376	62921	64539
2014-10-17 00:08:56.440	61176	61365	62907	64509
2014-10-17 00:08:56.444	61170	61354	62887	64465
2014-10-17 00:08:56.450	61168	61374	62892	64409
2014-10-17 00:08:56.454	61156	61358	62899	64405
2014-10-17 00:08:56.460	61154	61360	62894	64415
2014-10-17 00:08:56.464	61166	61381	62903	64405
2014-10-17 00:08:56.470	61164	61361	62893	64450
2014-10-17 00:08:56.474	61170	61361	62878	64485
2014-10-17 00:08:56.480	61154	61370	62888	64468
2014-10-17 00:08:56.484	61153	61360	62898	64481
2014-10-17 00:08:56.490	61173	61367	62909	64498
2014-10-17 00:08:56.494	61155	61373	62908	64487
2014-10-17 00:08:56.500	61149	61359	62892	64488
2014-10-17 00:08:56.505	61148	61352	62885	64488
2014-10-17 00:08:56.509	61155	61351	62893	64490
2014-10-17 00:08:56.515	61168	61360	62907	64524
2014-10-17 00:08:56.519	61148	61359	62920	64541
2014-10-17 00:08:56.525	61165	61350	62930	64529
2014-10-17 00:08:56.529	61161	61369	62923	64525
2014-10-17 00:08:56.535	61144	61360	62910	64485
2014-10-17 00:08:56.539	61168	61336	62886	64438
2014-10-17 00:08:56.545	61154	61364	62880	64431
2014-10-17 00:08:56.549	61168	61366	62893	64455
2014-10-17 00:08:56.555	61155	61347	62898	64487
2014-10-17 00:08:56.559	61128	61371	62894	64501
2014-10-17 00:08:56.565	61158	61360	62868	64507
2014-10-17 00:08:56.569	61141	61332	62861	64484
2014-10-17 00:08:56.575	61147	61357	62840	64453
2014-10-17 00:08:56.579	61152	61374	62819	64410
2014-10-17 00:08:56.585	61140	61358	62838	64351
2014-10-17 00:08:56.589	61152	61356	62844	64314
2014-10-17 00:08:56.595	61146	61365	62871	64286
2014-10-17 00:08:56.599	61146	61340	62883	64319
2014-10-17 00:08:56.605	61140	61338	62883	64388
2014-10-17 00:08:56.609	61131	61357	62914	64443
2014-10-17 00:08:56.615	61150	61341	62922	64521
2014-10-17 00:08:56.619	61161	61358	62919	64566
2014-10-17 00:08:56.625	61138	61355	62907	64579
2014-10-17 00:08:56.630	61130	61336	62901	64610
2014-10-17 00:08:56.634	61147	61345	62905	64622
2014-10-17 00:08:56.640	61151	61333	62897	64614
2014-10-17 00:08:56.644	61146	61354	62873	64603
2014-10-17 00:08:56.650	61132	61347	62865	64585
2014-10-17 00:08:56.654	61140	61325	62885	64542
2014-10-17 00:08:56.660	61149	61359	62879	64510
2014-10-17 00:08:56.664	61141	61341	62886	64480
2014-10-17 00:08:56.670	61157	61328	62909	64414
2014-10-17 00:08:56.674	61147	61348	62911	64379
2014-10-17 00:08:56.680	61123	61336	62893	64335
2014-10-17 00:08:56.684	61142	61342	62874	64296
2014-10-17 00:08:56.690	61147	61338	62889	64311
2014-10-17 00:08:56.694	61130	61338	62890	64329
2014-10-17 00:08:56.700	61131	61351	62894	64346
2014-10-17 00:08:56.704	61128	61329	62909	64335
2014-10-17 00:08:56.710	61141	61328	62904	64319
2014-10-17 00:08:56.714	61151	61337	62899	64337
2014-10-17 00:08:56.720	61130	61332	62878	64370
2014-10-17 00:08:56.724	61135	61335	62866	64427
2014-10-17 00:08:56.730	61135	61335	62874	64470
2014-10-17 00:08:56.734	61127	61343	62866	64539
2014-10-17 00:08:56.740	61135	61332	62848	64636
2014-10-17 00:08:56.744	61125	61323	62849	64668
2014-10-17 00:08:56.750	61137	61342	62865	64647
2014-10-17 00:08:56.755	61138	61337	62865	64606
2014-10-17 00:08:56.759	61116	61328	62876	64602
2014-10-17 00:08:56.765	61126	61321	62882	64583
2014-10-17 00:08:56.769	61113	61316	62859	64526
2014-10-17 00:08:56.775	61123	61323	62840	64508
2014-10-17 00:08:56.779	61146	61330	62824	64458
2014-10-17 00:08:56.785	61117	61335	62826	64410
2014-10-17 00:08:56.789	61131	61326	62842	64387
2014-10-17 00:08:56.795	61145	61319	62849	64344
2014-10-17 00:08:56.799	61140	61331	62873	64304
2014-10-17 00:08:56.805	61126	61334	62885	64258
2014-10-17 00:08:56.809	61115	61323	62863	64237
2014-10-17 00:08:56.815	61126	61319	62854	64242
2014-10-17 00:08:56.819	61114	61324	62876	64252
2014-10-17 00:08:56.825	61134	61323	62891	64292
2014-10-17 00:08:56.829	61122	61318	62874	64361
2014-10-17 00:08:56.835	61120	61320	62882	64431
2014-10-17 00:08:56.839	61138	61318	62894	64498
2014-10-17 00:08:56.845	61105	61318	62875	64582
2014-10-17 00:08:56.849	61130	61330	62872	64632
2014-10-17 00:08:56.855	61123	61323	62859	64632
2014-10-17 00:08:56.859	61098	61314	62865	64628
2014-10-17 00:08:56.865	61116	61319	62880	64598
2014-10-17 00:08:56.869	61109	61313	62853	64545
2014-10-17 00:08:56.875	61114	61315	62829	64513
2014-10-17 00:08:56.880	61103	61311	62810	64479
2014-10-17 00:08:56.884	61108	61299	62813	64456
2014-10-17 00:08:56.890	61130	61318	62837	64444
2014-10-17 00:08:56.894	61121	61313	62854	64390
2014-10-17 00:08:56.900	61118	61290	62856	64338
2014-10-17 00:08:56.904	61113	61307	62846	64312
2014-10-17 00:08:56.910	61102	61313	62856	64282
2014-10-17 00:08:56.914	61100	61301	62875	64288
2014-10-17 00:08:56.920	61100	61305	62877	64319
2014-10-17 00:08:56.924	61098	61313	62861	64346
2014-10-17 00:08:56.930	61121	61313	62859	64366
2014-10-17 00:08:56.934	61123	61305	62877	64368
2014-10-17 00:08:56.940	61095	61293	62869	64384
2014-10-17 00:08:56.944	61102	61289	62853	64432
2014-10-17 00:08:56.950	61125	61305	62855	64505
2014-10-17 00:08:56.954	61113	61312	62875	64533
2014-10-17 00:08:56.960	61096	61296	62881	64524
2014-10-17 00:08:56.964	61115	61302	62870	64517
2014-10-17 00:08:56.970	61116	61306	62865	64508
2014-10-17 00:08:56.974	61097	61291	62849	64498
2014-10-17 00:08:56.980	61090	61288	62849	64480
2014-10-17 00:08:56.984	61086	61286	62867	64463
2014-10-17 00:08:56.990	61090	61305	62872	64435
2014-10-17 00:08:56.994	61093	61302	62859	64398
2014-10-17 00:08:57.000	61091	61285	62832	64353
2014-10-17 00:08:57.005	61103	61310	62810	64337
2014-10-17 00:08:57.009	61093	61297	62792	64358
2014-10-17 00:08:57.015	61085	61280	62806	64366
2014-10-17 00:08:57.019	61094	61300	62821	64396
2014-10-17 00:08:57.025	61084	61301	62813	64401
2014-10-17 00:08:57.029	61103	61291	62844	64362
2014-10-17 00:08:57.035	61096	61292	62860	64361
2014-10-17 00:08:57.039	61085	61303	62855	64392
2014-10-17 00:08:57.045	61110	61299	62862	64421
2014-10-17 00:08:57.049	61085	61281	62852	64415
2014-10-17 00:08:57.055	61079	61279	62845	64418
2014-10-17 00:08:57.059	61087	61294	62841	64434
2014-10-17 00:08:57.065	61080	61287	62855	64401
2014-10-17 00:08:57.069	61088	61291	62871	64412
2014-10-17 00:08:57.075	61075	61298	62872	64442
2014-10-17 00:08:57.079	61087	61284	62881	64410
2014-10-17 00:08:57.085	61096	61304	62891	64407
2014-10-17 00:08:57.089	61077	61304	62885	64414
2014-10-17 00:08:57.095	61088	61285	62846	64394
2014-10-17 00:08:57.099	61082	61288	62811	64395
2014-10-17 00:08:57.105	61082	61288	62823	64400
2014-10-17 00:08:57.109	61082	61292	62852	64421
2014-10-17 00:08:57.115	61075	61283	62868	64469
2014-10-17 00:08:57.119	61104	61276	62862	64503
2014-10-17 00:08:57.125	61088	61296	62836	64496
2014-10-17 00:08:57.130	61070	61290	62819	64464
2014-10-17 00:08:57.134	61089	61264	62823	64433
2014-10-17 00:08:57.140	61092	61292	62824	64387
2014-10-17 00:08:57.144	61077	61291	62805	64352
2014-10-17 00:08:57.150	61059	61266	62791	64339
2014-10-17 00:08:57.154	61087	61286	62780	64312
2014-10-17 00:08:57.160	61081	61279	62787	64313
2014-10-17 00:08:57.164	61057	61277	62814	64330
2014-10-17 00:08:57.170	61074	61282	62828	64360
2014-10-17 00:08:57.174	61074	61280	62838	64400
2014-10-17 00:08:57.180	61076	61275	62825	64379
2014-10-17 00:08:57.184	61073	61261	62797	64388
2014-10-17 00:08:57.190	61069	61276	62800	64401
2014-10-17 00:08:57.194	61089	61269	62816	64341
2014-10-17 00:08:57.200	61083	61256	62819	64333
2014-10-17 00:08:57.204	61067	61267	62813	64346
2014-10-17 00:08:57.210	61083	61266	62832	64370
2014-10-17 00:08:57.214	61093	61274	62865	64410
2014-10-17 00:08:57.220	61070	61282	62857	64420
2014-10-17 00:08:57.224	61064	61272	62855	64421
2014-10-17 00:08:57.230	61072	61270	62871	64406
2014-10-17 00:08:57.234	61071	61273	62865	64415
2014-10-17 00:08:57.240	61059	61272	62854	64424
2014-10-17 00:08:57.244	61057	61270	62840	64422
2014-10-17 00:08:57.250	61072	61253	62819	64449
2014-10-17 00:08:57.255	61065	61258	62792	64477
2014-10-17 00:08:57.259	61048	61272	62768	64466
2014-10-17 00:08:57.265	61059	61246	62782	64433
2014-10-17 00:08:57.269	61079	61252	62778	64408
2014-10-17 00:08:57.275	61062	61265	62755	64351
2014-10-17 00:08:57.279	61056	61251	62779	64301
2014-10-17 00:08:57.285	61063	61252	62787	64300
2014-10-17 00:08:57.289	61058	61250	62794	64328
2014-10-17 00:08:57.295	61069	61262	62822	64378
2014-10-17 00:08:57.299	61063	61265	62820	64403
2014-10-17 00:08:57.305	61061	61246	62841	64392
2014-10-17 00:08:57.309	61056	61256	62846	64369
2014-10-17 00:08:57.315	61048	61266	62826	64361
2014-10-17 00:08:57.319	61063	61261	62842	64358
2014-10-17 00:08:57.325	61060	61264	62857	64353
2014-10-17 00:08:57.329	61065	61260	62862	64342
2014-10-17 00:08:57.335	61065	61264	62858	64308
2014-10-17 00:08:57.339	61060	61266	62843	64320
2014-10-17 00:08:57.345	61062	61258	62830	64379
2014-10-17 00:08:57.349	61053	61249	62832	64421
2014-10-17 00:08:57.355	61058	61247	62830	64453
2014-10-17 00:08:57.359	61070	61268	62823	64471
2014-10-17 00:08:57.365	61066	61257	62833	64466
2014-10-17 00:08:57.369	61042	61259	62819	64449
2014-10-17 00:08:57.375	61045	61262	62800	64409
2014-10-17 00:08:57.380	61062	61234	62800	64390
2014-10-17 00:08:57.384	61056	61254	62796	64381
2014-10-17 00:08:57.390	61059	61259	62793	64358
2014-10-17 00:08:57.394	61058	61249	62777	64359
2014-10-17 00:08:57.400	61043	61256	62765	64337
2014-10-17 00:08:57.404	61058	61256	62769	64306
2014-10-17 00:08:57.410	61065	61252	62780	64301
2014-10-17 00:08:57.414	61054	61239	62789	64319
2014-10-17 00:08:57.420	61059	61245	62794	64360
2014-10-17 00:08:57.424	61054	61255	62817	64350
2014-10-17 00:08:57.430	61056	61249	62825	64337
2014-10-17 00:08:57.434	61054	61257	62817	64354
2014-10-17 00:08:57.440	61043	61259	62834	64353
2014-10-17 00:08:57.444	61062	61239	62836	64376
2014-10-17 00:08:57.450	61050	61246	62811	64397
2014-10-17 00:08:57.454	61032	61251	62806	64404
2014-10-17 00:08:57.460	61048	61234	62803	64436
2014-10-17 00:08:57.464	61052	61246	62797	64459
2014-10-17 00:08:57.470	61035	61241	62811	64442
2014-10-17 00:08:57.474	61021	61226	62833	64396
2014-10-17 00:08:57.480	61036	61242	62825	64357
2014-10-17 00:08:57.484	61041	61247	62801	64350
2014-10-17 00:08:57.490	61036	61231	62790	64347
2014-10-17 00:08:57.494	61049	61229	62783	64317
2014-10-17 00:08:57.500	61055	61243	62796	64312
2014-10-17 00:08:57.505	61045	61249	62798	64318
2014-10-17 00:08:57.509	61037	61240	62776	64299
2014-10-17 00:08:57.515	61052	61237	62784	64290
2014-10-17 00:08:57.519	61044	61242	62790	64296
2014-10-17 00:08:57.525	61043	61244	62773	64303
2014-10-17 00:08:57.529	61055	61235	62771	64319
2014-10-17 00:08:57.535	61030	61236	62761	64345
2014-10-17 00:08:57.539	61033	61247	62759	64388
2014-10-17 00:08:57.545	61043	61242	62778	64446
2014-10-17 00:08:57.549	61043	61241	62785	64462
2014-10-17 00:08:57.555	61048	61243	62788	64425
2014-10-17 00:08:57.559	61023	61232	62781	64386
2014-10-17 00:08:57.565	61048	61226	62780	64366
2014-10-17 00:08:57.569	61066	61246	62787	64374
2014-10-17 00:08:57.575	61024	61241	62802	64397
2014-10-17 00:08:57.579	61039	61219	62829	64418
2014-10-17 00:08:57.585	61040	61239	62825	64416
2014-10-17 00:08:57.589	61042	61235	62806	64375
2014-10-17 00:08:57.595	61051	61231	62800	64337
2014-10-17 00:08:57.599	61016	61236	62802	64288
2014-10-17 00:08:57.605	61044	61228	62810	64227
2014-10-17 00:08:57.609	61051	61244	62805	64220
2014-10-17 00:08:57.615	61039	61232	62787	64242
2014-10-17 00:08:57.619	61041	61234	62784	64252
2014-10-17 00:08:57.625	61013	61242	62776	64280
2014-10-17 00:08:57.630	61042	61227	62752	64320
2014-10-17 00:08:57.634	61042	61237	62752	64353
2014-10-17 00:08:57.640	61029	61240	62783	64357
2014-10-17 00:08:57.644	61047	61228	62802	64371
2014-10-17 00:08:57.650	61028	61212	62795	64404
2014-10-17 00:08:57.654	61032	61239	62794	64418
2014-10-17 00:08:57.660	61037	61243	62811	64452
2014-10-17 00:08:57.664	61044	61220	62821	64506
2014-10-17 00:08:57.670	61055	61240	62829	64560
2014-10-17 00:08:57.674	61026	61226	62842	64535
2014-10-17 00:08:57.680	61019	61223	62843	64431
2014-10-17 00:08:57.684	61041	61230	62818	64371
2014-10-17 00:08:57.690	61034	61232	62778	64343
2014-10-17 00:08:57.694	61015	61229	62763	64303
2014-10-17 00:08:57.700	61049	61219	62776	64244
2014-10-17 00:08:57.704	61060	61252	62769	64194
2014-10-17 00:08:57.710	61025	61240	62768	64161
2014-10-17 00:08:57.714	61019	61222	62762	64117
2014-10-17 00:08:57.720	61028	61235	62763	64130
2014-10-17 00:08:57.724	61043	61230	62775	64184
2014-10-17 00:08:57.730	61012	61229	62754	64241
2014-10-17 00:08:57.734	60998	61214	62763	64307
2014-10-17 00:08:57.740	61043	61230	62764	64349
2014-10-17 00:08:57.744	61027	61234	62764	64359
2014-10-17 00:08:57.750	61022	61214	62806	64375
2014-10-17 00:08:57.755	61033	61248	62805	64416
2014-10-17 00:08:57.759	61034	61229	62805	64456
2014-10-17 00:08:57.765	61042	61212	62802	64493
2014-10-17 00:08:57.769	61009	61255	62773	64515
2014-10-17 00:08:57.775	61024	61220	62774	64526
2014-10-17 00:08:57.779	61043	61207	62759	64527
2014-10-17 00:08:57.785	61008	61231	62752	64473
2014-10-17 00:08:57.789	61024	61224	62767	64412
2014-10-17 00:08:57.795	61039	61234	62754	64338
2014-10-17 00:08:57.799	61016	61220	62763	64233
2014-10-17 00:08:57.805	61019	61221	62778	64208
2014-10-17 00:08:57.809	61020	61225	62790	64213
2014-10-17 00:08:57.815	61026	61207	62798	64221
2014-10-17 00:08:57.819	61034	61225	62780	64237
2014-10-17 00:08:57.825	61019	61223	62786	64201
2014-10-17 00:08:57.829	61023	61212	62797	64206
2014-10-17 00:08:57.835	61020	61224	62787	64240
2014-10-17 00:08:57.839	61021	61223	62788	64242
2014-10-17 00:08:57.845	61029	61208	62798	64252
2014-10-17 00:08:57.849	61025	61216	62795	64307
2014-10-17 00:08:57.855	61024	61234	62783	64382
2014-10-17 00:08:57.859	61015	61226	62772	64432
2014-10-17 00:08:57.865	61029	61235	62753	64481
2014-10-17 00:08:57.869	61026	61223	62741	64481
2014-10-17 00:08:57.875	61008	61215	62729	64441
2014-10-17 00:08:57.880	61030	61230	62719	64394
2014-10-17 00:08:57.884	61030	61203	62731	64344
2014-10-17 00:08:57.890	61018	61208	62743	64338
2014-10-17 00:08:57.894	61012	61226	62757	64355
2014-10-17 00:08:57.900	61007	61226	62754	64361
2014-10-17 00:08:57.904	61033	61223	62744	64347
2014-10-17 00:08:57.910	61020	61219	62755	64328
2014-10-17 00:08:57.914	60992	61227	62759	64290
2014-10-17 00:08:57.920	61019	61208	62759	64254
2014-10-17 00:08:57.924	61030	61209	62745	64258
2014-10-17 00:08:57.930	61024	61230	62735	64243
2014-10-17 00:08:57.934	61002	61224	62745	64232
2014-10-17 00:08:57.940	61001	61211	62764	64264
2014-10-17 00:08:57.944	61023	61218	62783	64295
2014-10-17 00:08:57.950	61006	61228	62770	64331
2014-10-17 00:08:57.954	61009	61228	62770	64354
2014-10-17 00:08:57.960	61026	61218	62782	64351
2014-10-17 00:08:57.964	61015	61209	62767	64371
2014-10-17 00:08:57.970	61000	61231	62759	64368
2014-10-17 00:08:57.974	61007	61213	62744	64334
2014-10-17 00:08:57.980	61022	61194	62718	64346
2014-10-17 00:08:57.984	61011	61223	62707	64346
2014-10-17 00:08:57.990	60998	61216	62719	64317
2014-10-17 00:08:57.994	61006	61213	62753	64319
2014-10-17 00:08:58.000	61041	61222	62757	64307
2014-10-17 00:08:58.005	61029	61203	62741	64305
2014-10-17 00:08:58.009	60993	61211	62744	64329
2014-10-17 00:08:58.015	61012	61211	62746	64345
2014-10-17 00:08:58.019	61022	61199	62771	64386
2014-10-17 00:08:58.025	61012	61214	62786	64355
2014-10-17 00:08:58.029	61005	61209	62765	64263
2014-10-17 00:08:58.035	61005	61207	62749	64244
2014-10-17 00:08:58.039	61012	61211	62745	64255
2014-10-17 00:08:58.045	61003	61195	62759	64270
2014-10-17 00:08:58.049	60997	61213	62780	64285
2014-10-17 00:08:58.055	61006	61223	62783	64313
2014-10-17 00:08:58.059	61010	61193	62761	64350
2014-10-17 00:08:58.065	61008	61202	62753	64346
2014-10-17 00:08:58.069	61007	61222	62764	64354
2014-10-17 00:08:58.075	60998	61204	62769	64359
2014-10-17 00:08:58.079	61007	61210	62786	64351
2014-10-17 00:08:58.085	61013	61227	62793	64363
2014-10-17 00:08:58.089	61008	61216	62784	64351
2014-10-17 00:08:58.095	61015	61204	62766	64336
2014-10-17 00:08:58.099	61002	61208	62735	64306
2014-10-17 00:08:58.105	61000	61220	62728	64256
2014-10-17 00:08:58.109	61004	61200	62732	64264
2014-10-17 00:08:58.115	61001	61201	62704	64289
2014-10-17 00:08:58.119	61014	61227	62689	64309
2014-10-17 00:08:58.125	61026	61205	62690	64327
2014-10-17 00:08:58.130	61015	61203	62711	64308
2014-10-17 00:08:58.134	60986	61223	62753	64292
2014-10-17 00:08:58.140	61006	61193	62757	64311
2014-10-17 00:08:58.144	61006	61197	62751	64355
2014-10-17 00:08:58.150	60990	61221	62756	64363
2014-10-17 00:08:58.154	61004	61194	62759	64332
2014-10-17 00:08:58.160	60994	61196	62787	64312
2014-10-17 00:08:58.164	61014	61202	62805	64276
2014-10-17 00:08:58.170	60999	61200	62800	64244
2014-10-17 00:08:58.174	60990	61208	62794	64244
2014-10-17 00:08:58.180	61010	61195	62792	64283
2014-10-17 00:08:58.184	60979	61205	62782	64344
2014-10-17 00:08:58.190	61004	61208	62763	64347
2014-10-17 00:08:58.194	61011	61201	62769	64334
2014-10-17 00:08:58.200	60981	61208	62767	64330
2014-10-17 00:08:58.204	60988	61207	62749	64306
2014-10-17 00:08:58.210	60993	61213	62743	64296
2014-10-17 00:08:58.214	61002	61204	62734	64276
2014-10-17 00:08:58.220	60990	61212	62731	64273
2014-10-17 00:08:58.224	60985	61209	62736	64312
2014-10-17 00:08:58.230	60990	61188	62747	64327
2014-10-17 00:08:58.234	60986	61207	62750	64326
2014-10-17 00:08:58.240	61003	61211	62748	64311
2014-10-17 00:08:58.244	61000	61190	62719	64295
2014-10-17 00:08:58.250	60987	61196	62697	64301
2014-10-17 00:08:58.255	60994	61214	62710	64291
2014-10-17 00:08:58.259	61007	61202	62702	64317
2014-10-17 00:08:58.265	61001	61186	62708	64330
2014-10-17 00:08:58.269	60990	61196	62732	64271
2014-10-17 00:08:58.275	60996	61213	62747	64270
2014-10-17 00:08:58.279	60999	61195	62757	64296
2014-10-17 00:08:58.285	60993	61192	62741	64258
2014-10-17 00:08:58.289	60994	61211	62741	64243
2014-10-17 00:08:58.295	60993	61193	62759	64296
2014-10-17 00:08:58.299	60989	61185	62754	64353
2014-10-17 00:08:58.305	61001	61194	62752	64345
2014-10-17 00:08:58.309	60999	61208	62753	64315
2014-10-17 00:08:58.315	60985	61206	62748	64302
2014-10-17 00:08:58.319	60977	61199	62751	64286
2014-10-17 00:08:58.325	60978	61215	62730	64301
2014-10-17 00:08:58.329	61010	61208	62717	64342
2014-10-17 00:08:58.335	61010	61210	62734	64373
2014-10-17 00:08:58.339	60984	61208	62721	64371
2014-10-17 00:08:58.345	60996	61187	62715	64371
2014-10-17 00:08:58.349	60995	61203	62719	64376
2014-10-17 00:08:58.355	60993	61217	62716	64335
2014-10-17 00:08:58.359	60985	61187	62727	64277
2014-10-17 00:08:58.365	60975	61198	62727	64226
2014-10-17 00:08:58.369	61006	61226	62736	64192
2014-10-17 00:08:58.375	61003	61190	62741	64183
2014-10-17 00:08:58.380	60985	61195	62733	64203
2014-10-17 00:08:58.384	60990	61228	62741	64235
2014-10-17 00:08:58.390	60997	61200	62734	64265
2014-10-17 00:08:58.394	61011	61198	62744	64277
2014-10-17 00:08:58.400	60994	61212	62753	64241
2014-10-17 00:08:58.404	60981	61199	62734	64266
2014-10-17 00:08:58.410	60985	61198	62746	64316
2014-10-17 00:08:58.414	60998	61196	62750	64335
2014-10-17 00:08:58.420	60989	61199	62748	64387
2014-10-17 00:08:58.424	60980	61200	62753	64411
2014-10-17 00:08:58.430	60989	61206	62736	64421
2014-10-17 00:08:58.434	60980	61217	62738	64414
2014-10-17 00:08:58.440	60997	61198	62748	64376
2014-10-17 00:08:58.444	60992	61181	62734	64363
2014-10-17 00:08:58.450	60978	61201	62713	64339
2014-10-17 00:08:58.454	60982	61195	62699	64310
2014-10-17 00:08:58.460	60970	61176	62706	64278
2014-10-17 00:08:58.464	60988	61212	62710	64241
2014-10-17 00:08:58.470	60984	61209	62716	64184
2014-10-17 00:08:58.474	60966	61179	62741	64142
2014-10-17 00:08:58.480	60985	61204	62757	64200
2014-10-17 00:08:58.484	60991	61202	62764	64268
2014-10-17 00:08:58.490	60986	61188	62758	64310
2014-10-17 00:08:58.494	60988	61205	62734	64348
2014-10-17 00:08:58.500	60980	61203	62719	64325
2014-10-17 00:08:58.505	60978	61188	62710	64283
2014-10-17 00:08:58.509	60991	61186	62710	64266
2014-10-17 00:08:58.515	60999	61196	62719	64256
2014-10-17 00:08:58.519	60998	61196	62713	64257
2014-10-17 00:08:58.525	60995	61188	62735	64303
2014-10-17 00:08:58.529	60994	61195	62767	64347
2014-10-17 00:08:58.535	60978	61208	62770	64362
2014-10-17 00:08:58.539	60979	61208	62767	64387
2014-10-17 00:08:58.545	60989	61204	62734	64396
2014-10-17 00:08:58.549	60985	61208	62708	64392
2014-10-17 00:08:58.555	60984	61201	62710	64373
2014-10-17 00:08:58.559	60989	61192	62715	64344
2014-10-17 00:08:58.565	60983	61207	62748	64329
2014-10-17 00:08:58.569	60976	61201	62768	64281
2014-10-17 00:08:58.575	60997	61190	62755	64229
2014-10-17 00:08:58.579	60996	61198	62752	64172
2014-10-17 00:08:58.585	60980	61210	62757	64140
2014-10-17 00:08:58.589	60985	61207	62751	64180
2014-10-17 00:08:58.595	60976	61188	62745	64204
2014-10-17 00:08:58.599	60978	61200	62748	64214
2014-10-17 00:08:58.605	61000	61209	62768	64243
2014-10-17 00:08:58.609	60995	61196	62773	64280
2014-10-17 00:08:58.615	60976	61194	62758	64333
2014-10-17 00:08:58.619	60975	61197	62745	64377
2014-10-17 00:08:58.625	60985	61214	62713	64398
2014-10-17 00:08:58.630	60994	61210	62690	64403
2014-10-17 00:08:58.634	60990	61199	62681	64370
2014-10-17 00:08:58.640	60971	61208	62664	64321
2014-10-17 00:08:58.644	60976	61203	62674	64313
2014-10-17 00:08:58.650	60993	61200	62690	64321
2014-10-17 00:08:58.654	60997	61215	62707	64307
2014-10-17 00:08:58.660	60986	61208	62734	64286
2014-10-17 00:08:58.664	60982	61209	62742	64297
2014-10-17 00:08:58.670	60987	61223	62746	64309
2014-10-17 00:08:58.674	60987	61206	62742	64289
2014-10-17 00:08:58.680	60992	61216	62734	64267
2014-10-17 00:08:58.684	60993	61215	62754	64253
2014-10-17 00:08:58.690	60987	61196	62768	64269
2014-10-17 00:08:58.694	60987	61209	62788	64288
2014-10-17 00:08:58.700	61006	61199	62808	64284
2014-10-17 00:08:58.704	61005	61205	62771	64265
2014-10-17 00:08:58.710	60988	61222	62747	64247
2014-10-17 00:08:58.714	60986	61210	62750	64270
2014-10-17 00:08:58.720	61001	61202	62751	64297
2014-10-17 00:08:58.724	61013	61212	62785	64308
2014-10-17 00:08:58.730	60984	61218	62772	64318
2014-10-17 00:08:58.734	60981	61197	62729	64305
2014-10-17 00:08:58.740	61001	61212	62711	64276
2014-10-17 00:08:58.744	60984	61234	62708	64268
2014-10-17 00:08:58.750	60983	61216	62737	64283
2014-10-17 00:08:58.755	60995	61210	62719	64303
2014-10-17 00:08:58.759	61010	61210	62676	64318
2014-10-17 00:08:58.765	61004	61206	62675	64332
2014-10-17 00:08:58.769	60989	61210	62689	64335
2014-10-17 00:08:58.775	60992	61228	62708	64312
2014-10-17 00:08:58.779	60990	61224	62721	64287
2014-10-17 00:08:58.785	61002	61207	62753	64303
2014-10-17 00:08:58.789	60986	61218	62773	64326
2014-10-17 00:08:58.795	60991	61219	62759	64328
2014-10-17 00:08:58.799	61021	61217	62761	64300
2014-10-17 00:08:58.805	60992	61217	62767	64239
2014-10-17 00:08:58.809	61000	61213	62762	64224
2014-10-17 00:08:58.815	61020	61224	62758	64238
2014-10-17 00:08:58.819	60995	61215	62743	64270
2014-10-17 00:08:58.825	60989	61209	62725	64344
2014-10-17 00:08:58.829	60988	61221	62725	64361
2014-10-17 00:08:58.835	60999	61219	62754	64362
2014-10-17 00:08:58.839	61013	61218	62765	64380
2014-10-17 00:08:58.845	60992	61219	62733	64393
2014-10-17 00:08:58.849	60985	61231	62733	64413
2014-10-17 00:08:58.855	61011	61223	62759	64405
2014-10-17 00:08:58.859	61010	61205	62749	64360
2014-10-17 00:08:58.865	60995	61207	62728	64276
2014-10-17 00:08:58.869	60997	61217	62720	64211
2014-10-17 00:08:58.875	61002	61226	62703	64206
2014-10-17 00:08:58.880	61011	61211	62719	64208
2014-10-17 00:08:58.884	61004	61210	62742	64205
2014-10-17 00:08:58.890	60981	61233	62730	64200
2014-10-17 00:08:58.894	60987	61226	62742	64200
2014-10-17 00:08:58.900	61020	61221	62733	64212
2014-10-17 00:08:58.904	61013	61226	62698	64224
2014-10-17 00:08:58.910	61000	61229	62694	64274
2014-10-17 00:08:58.914	61003	61229	62720	64333
2014-10-17 00:08:58.920	60992	61225	62768	64368
2014-10-17 00:08:58.924	61020	61236	62784	64396
2014-10-17 00:08:58.930	61015	61232	62776	64404
2014-10-17 00:08:58.934	60988	61221	62781	64423
2014-10-17 00:08:58.940	61015	61234	62790	64438
2014-10-17 00:08:58.944	61013	61224	62792	64443
2014-10-17 00:08:58.950	61004	61231	62774	64407
2014-10-17 00:08:58.954	61006	61242	62770	64346
2014-10-17 00:08:58.960	61011	61231	62771	64315
2014-10-17 00:08:58.964	61010	61243	62754	64277
2014-10-17 00:08:58.970	60989	61239	62736	64274
2014-10-17 00:08:58.974	61002	61242	62738	64279
2014-10-17 00:08:58.980	61031	61238	62723	64252
2014-10-17 00:08:58.984	61022	61224	62707	64243
2014-10-17 00:08:58.990	61005	61247	62715	64226
2014-10-17 00:08:58.994	61004	61242	62703	64204
2014-10-17 00:08:59.000	61014	61243	62698	64196
2014-10-17 00:08:59.005	61024	61239	62707	64230
2014-10-17 00:08:59.009	61012	61232	62706	64317
2014-10-17 00:08:59.015	61012	61248	62690	64359
2014-10-17 00:08:59.019	61025	61229	62700	64341
2014-10-17 00:08:59.025	61020	61244	62750	64327
2014-10-17 00:08:59.029	61013	61252	62761	64337
2014-10-17 00:08:59.035	61012	61226	62753	64379
2014-10-17 00:08:59.039	61025	61238	62750	64432
2014-10-17 00:08:59.045	61027	61236	62756	64440
2014-10-17 00:08:59.049	61025	61233	62771	64407
2014-10-17 00:08:59.055	61024	61252	62786	64377
2014-10-17 00:08:59.059	61017	61238	62819	64339
2014-10-17 00:08:59.065	61008	61235	62809	64301
2014-10-17 00:08:59.069	61015	61259	62774	64296
2014-10-17 00:08:59.075	61044	61246	62765	64321
2014-10-17 00:08:59.079	61025	61246	62767	64351
2014-10-17 00:08:59.085	61013	61259	62794	64340
2014-10-17 00:08:59.089	61016	61246	62798	64321
2014-10-17 00:08:59.095	61020	61243	62771	64290
2014-10-17 00:08:59.099	61039	61241	62762	64248
2014-10-17 00:08:59.105	61018	61251	62738	64238
2014-10-17 00:08:59.109	61021	61251	62721	64230
2014-10-17 00:08:59.115	61028	61242	62738	64259
2014-10-17 00:08:59.119	61020	61258	62742	64313
2014-10-17 00:08:59.125	61022	61241	62731	64355
2014-10-17 00:08:59.130	61034	61243	62731	64406
2014-10-17 00:08:59.134	61036	61264	62722	64411
2014-10-17 00:08:59.140	61006	61253	62719	64378
2014-10-17 00:08:59.144	61019	61259	62743	64361
2014-10-17 00:08:59.150	61047	61251	62768	64364
2014-10-17 00:08:59.154	61041	61255	62782	64361
2014-10-17 00:08:59.160	61022	61267	62797	64350
2014-10-17 00:08:59.164	61027	61253	62800	64363
2014-10-17 00:08:59.170	61056	61259	62790	64372
2014-10-17 00:08:59.174	61039	61267	62801	64375
2014-10-17 00:08:59.180	61024	61265	62817	64362
2014-10-17 00:08:59.184	61027	61272	62806	64341
2014-10-17 00:08:59.190	61044	61261	62794	64328
2014-10-17 00:08:59.194	61059	61265	62767	64286
2014-10-17 00:08:59.200	61030	61282	62748	64254
2014-10-17 00:08:59.204	61040	61251	62783	64245
2014-10-17 00:08:59.210	61058	61256	62797	64240
2014-10-17 00:08:59.214	61035	61271	62785	64281
2014-10-17 00:08:59.220	61032	61252	62767	64322
2014-10-17 00:08:59.224	61044	61275	62733	64376
2014-10-17 00:08:59.230	61042	61283	62742	64424
2014-10-17 00:08:59.234	61041	61260	62751	64394
2014-10-17 00:08:59.240	61051	61257	62741	64384
2014-10-17 00:08:59.244	61044	61277	62747	64359
2014-10-17 00:08:59.250	61040	61278	62736	64312
2014-10-17 00:08:59.255	61047	61272	62750	64358
2014-10-17 00:08:59.259	61044	61279	62763	64424
2014-10-17 00:08:59.265	61042	61270	62739	64438
2014-10-17 00:08:59.269	61040	61258	62720	64422
2014-10-17 00:08:59.275	61047	61264	62712	64360
2014-10-17 00:08:59.279	61039	61279	62727	64282
2014-10-17 00:08:59.285	61038	61281	62740	64248
2014-10-17 00:08:59.289	61053	61270	62744	64254
2014-10-17 00:08:59.295	61054	61266	62735	64288
2014-10-17 00:08:59.299	61048	61277	62748	64331
2014-10-17 00:08:59.305	61042	61277	62798	64343
2014-10-17 00:08:59.309	61071	61277	62807	64345
2014-10-17 00:08:59.315	61052	61285	62812	64315
2014-10-17 00:08:59.319	61017	61275	62830	64261
2014-10-17 00:08:59.325	61056	61283	62822	64273
2014-10-17 00:08:59.329	61058	61284	62809	64348
2014-10-17 00:08:59.335	61042	61280	62796	64401
2014-10-17 00:08:59.339	61051	61283	62784	64422
2014-10-17 00:08:59.345	61056	61280	62767	64433
2014-10-17 00:08:59.349	61066	61281	62760	64439
2014-10-17 00:08:59.355	61054	61278	62760	64430
2014-10-17 00:08:59.359	61047	61285	62759	64398
2014-10-17 00:08:59.365	61059	61281	62743	64387
2014-10-17 00:08:59.369	61063	61274	62722	64400
2014-10-17 00:08:59.375	61052	61280	62748	64403
2014-10-17 00:08:59.380	61050	61281	62769	64388
2014-10-17 00:08:59.384	61066	61287	62746	64339
2014-10-17 00:08:59.390	61056	61274	62742	64295
2014-10-17 00:08:59.394	61050	61281	62776	64274
2014-10-17 00:08:59.400	61069	61306	62799	64261
2014-10-17 00:08:59.404	61060	61270	62809	64262
2014-10-17 00:08:59.410	61049	61274	62814	64272
2014-10-17 00:08:59.414	61071	61310	62810	64325
2014-10-17 00:08:59.420	61072	61286	62797	64384
2014-10-17 00:08:59.424	61067	61281	62779	64383
2014-10-17 00:08:59.430	61077	61300	62779	64390
2014-10-17 00:08:59.434	61060	61289	62786	64425
2014-10-17 00:08:59.440	61063	61291	62788	64421
2014-10-17 00:08:59.444	61070	61300	62780	64401
2014-10-17 00:08:59.450	61060	61287	62768	64418
2014-10-17 00:08:59.454	61066	61278	62785	64418
2014-10-17 00:08:59.460	61056	61280	62816	64392
2014-10-17 00:08:59.464	61062	61302	62836	64398
2014-10-17 00:08:59.470	61083	61314	62838	64394
2014-10-17 00:08:59.474	61081	61294	62833	64343
2014-10-17 00:08:59.480	61084	61289	62811	64279
2014-10-17 00:08:59.484	61061	61301	62791	64257
2014-10-17 00:08:59.490	61067	61301	62791	64280
2014-10-17 00:08:59.494	61092	61294	62765	64301
2014-10-17 00:08:59.500	61074	61297	62748	64322
2014-10-17 00:08:59.505	61067	61309	62757	64370
2014-10-17 00:08:59.509	61067	61308	62738	64423
2014-10-17 00:08:59.515	61078	61301	62734	64429
2014-10-17 00:08:59.519	61087	61301	62754	64419
2014-10-17 00:08:59.525	61073	61296	62749	64404
2014-10-17 00:08:59.529	61078	61306	62749	64366
2014-10-17 00:08:59.535	61093	61312	62778	64369
2014-10-17 00:08:59.539	61074	61300	62800	64407
2014-10-17 00:08:59.545	61071	61310	62816	64430
2014-10-17 00:08:59.549	61094	61309	62812	64442
2014-10-17 00:08:59.555	61079	61308	62791	64453
2014-10-17 00:08:59.559	61066	61310	62793	64443
2014-10-17 00:08:59.565	61080	61307	62808	64408
2014-10-17 00:08:59.569	61082	61305	62843	64361
2014-10-17 00:08:59.575	61068	61291	62842	64309
2014-10-17 00:08:59.579	61077	61311	62811	64294
2014-10-17 00:08:59.585	61092	61309	62813	64295
2014-10-17 00:08:59.589	61083	61296	62819	64293
2014-10-17 00:08:59.595	61091	61319	62820	64297
2014-10-17 00:08:59.599	61087	61313	62799	64300
2014-10-17 00:08:59.605	61081	61305	62782	64327
2014-10-17 00:08:59.609	61083	61311	62772	64343
2014-10-17 00:08:59.615	61078	61314	62765	64376
2014-10-17 00:08:59.619	61090	61303	62784	64428
2014-10-17 00:08:59.625	61093	61315	62791	64439
2014-10-17 00:08:59.630	61087	61322	62804	64447
2014-10-17 00:08:59.634	61082	61299	62814	64437
2014-10-17 00:08:59.640	61082	61309	62796	64416
2014-10-17 00:08:59.644	61087	61313	62789	64428
2014-10-17 00:08:59.650	61088	61312	62779	64457
2014-10-17 00:08:59.654	61086	61304	62763	64501
2014-10-17 00:08:59.660	61092	61303	62765	64496
2014-10-17 00:08:59.664	61099	61325	62780	64414
2014-10-17 00:08:59.670	61076	61306	62789	64348
2014-10-17 00:08:59.674	61092	61308	62769	64319
2014-10-17 00:08:59.680	61108	61321	62759	64316
2014-10-17 00:08:59.684	61087	61318	62763	64302
2014-10-17 00:08:59.690	61094	61315	62769	64282
2014-10-17 00:08:59.694	61095	61312	62799	64284
2014-10-17 00:08:59.700	61101	61315	62806	64273
2014-10-17 00:08:59.704	61095	61309	62807	64300
2014-10-17 00:08:59.710	61088	61320	62825	64349
2014-10-17 00:08:59.714	61106	61323	62849	64370
2014-10-17 00:08:59.720	61105	61313	62881	64396
2014-10-17 00:08:59.724	61103	61312	62883	64420
2014-10-17 00:08:59.730	61081	61312	62883	64444
2014-10-17 00:08:59.734	61083	61322	62879	64461
2014-10-17 00:08:59.740	61119	61327	62838	64469
2014-10-17 00:08:59.744	61111	61318	62837	64472
2014-10-17 00:08:59.750	61088	61326	62857	64452
2014-10-17 00:08:59.755	61098	61339	62845	64424
2014-10-17 00:08:59.759	61105	61319	62830	64436
2014-10-17 00:08:59.765	61086	61315	62821	64464
2014-10-17 00:08:59.769	61085	61314	62815	64417
2014-10-17 00:08:59.775	61105	61307	62797	64345
2014-10-17 00:08:59.779	61107	61325	62788	64320
2014-10-17 00:08:59.785	61089	61316	62799	64334
2014-10-17 00:08:59.789	61100	61318	62799	64362
2014-10-17 00:08:59.795	61119	61340	62803	64358
2014-10-17 00:08:59.799	61106	61321	62797	64375
2014-10-17 00:08:59.805	61096	61309	62779	64401
2014-10-17 00:08:59.809	61098	61349	62789	64386
2014-10-17 00:08:59.815	61085	61339	62802	64368
2014-10-17 00:08:59.819	61092	61308	62805	64340
2014-10-17 00:08:59.825	61105	61338	62806	64342
2014-10-17 00:08:59.829	61100	61322	62796	64378
2014-10-17 00:08:59.835	61118	61308	62787	64394
2014-10-17 00:08:59.839	61110	61333	62784	64399
2014-10-17 00:08:59.845	61099	61327	62781	64381
2014-10-17 00:08:59.849	61110	61319	62783	64371
2014-10-17 00:08:59.855	61104	61335	62798	64361
2014-10-17 00:08:59.859	61105	61339	62800	64362
2014-10-17 00:08:59.865	61104	61318	62807	64427
2014-10-17 00:08:59.869	61105	61324	62836	64449
2014-10-17 00:08:59.875	61103	61324	62856	64434
2014-10-17 00:08:59.880	61099	61324	62866	64442
2014-10-17 00:08:59.884	61113	61328	62873	64443
2014-10-17 00:08:59.890	61117	61313	62880	64431
2014-10-17 00:08:59.894	61113	61332	62877	64413
2014-10-17 00:08:59.900	61111	61328	62865	64425
2014-10-17 00:08:59.904	61111	61318	62843	64420
2014-10-17 00:08:59.910	61108	61345	62826	64348
2014-10-17 00:08:59.914	61120	61335	62825	64327
2014-10-17 00:08:59.920	61119	61322	62802	64365
2014-10-17 00:08:59.924	61098	61337	62798	64363
2014-10-17 00:08:59.930	61117	61343	62804	64360
2014-10-17 00:08:59.934	61123	61332	62797	64345
2014-10-17 00:08:59.940	61117	61325	62798	64328
2014-10-17 00:08:59.944	61117	61343	62795	64391
2014-10-17 00:08:59.950	61095	61326	62815	64435
2014-10-17 00:08:59.954	61112	61307	62830	64454
2014-10-17 00:08:59.960	61118	61330	62818	64496
2014-10-17 00:08:59.964	61105	61328	62820	64476
2014-10-17 00:08:59.970	61109	61333	62825	64431
2014-10-17 00:08:59.974	61103	61338	62839	64388
2014-10-17 00:08:59.980	61106	61323	62839	64346
2014-10-17 00:08:59.984	61113	61342	62839	64331
2014-10-17 00:08:59.990	61131	61351	62868	64363
2014-10-17 00:08:59.994	61116	61332	62871	64417
2014-10-17 00:09:00.000	61097	61339	62836	64413
2014-10-17 00:09:00.005	61114	61338	62809	64436
2014-10-17 00:09:00.009	61101	61334	62808	64471
2014-10-17 00:09:00.015	61103	61333	62808	64445
2014-10-17 00:09:00.019	61111	61317	62812	64448
2014-10-17 00:09:00.025	61121	61334	62804	64434
2014-10-17 00:09:00.029	61127	61326	62786	64392
2014-10-17 00:09:00.035	61105	61335	62803	64392
2014-10-17 00:09:00.039	61104	61342	62812	64409
2014-10-17 00:09:00.045	61115	61304	62818	64421
2014-10-17 00:09:00.049	61115	61337	62848	64410
2014-10-17 00:09:00.055	61102	61352	62862	64366
2014-10-17 00:09:00.059	61111	61332	62865	64330
2014-10-17 00:09:00.065	61136	61335	62869	64325
2014-10-17 00:09:00.069	61122	61339	62882	64355
2014-10-17 00:09:00.075	61111	61330	62900	64390
2014-10-17 00:09:00.079	61121	61331	62900	64381
2014-10-17 00:09:00.085	61119	61360	62895	64395
2014-10-17 00:09:00.089	61116	61338	62870	64408
2014-10-17 00:09:00.095	61126	61339	62838	64388
2014-10-17 00:09:00.099	61124	61351	62838	64396
2014-10-17 00:09:00.105	61119	61336	62851	64427
2014-10-17 00:09:00.109	61126	61344	62853	64472
2014-10-17 00:09:00.115	61110	61337	62845	64477
2014-10-17 00:09:00.119	61107	61345	62823	64464
2014-10-17 00:09:00.125	61122	61340	62798	64462
2014-10-17 00:09:00.130	61113	61327	62785	64430
2014-10-17 00:09:00.134	61107	61337	62769	64400
2014-10-17 00:09:00.140	61114	61340	62763	64373
2014-10-17 00:09:00.144	61120	61345	62770	64364
2014-10-17 00:09:00.150	61124	61341	62777	64393
2014-10-17 00:09:00.154	61121	61339	62788	64422
2014-10-17 00:09:00.160	61113	61341	62801	64461
2014-10-17 00:09:00.164	61118	61343	62812	64482
2014-10-17 00:09:00.170	61134	61348	62822	64445
2014-10-17 00:09:00.174	61131	61345	62849	64404
2014-10-17 00:09:00.180	61111	61349	62864	64357
2014-10-17 00:09:00.184	61127	61356	62858	64327
2014-10-17 00:09:00.190	61147	61352	62857	64372
2014-10-17 00:09:00.194	61121	61355	62866	64408
2014-10-17 00:09:00.200	61119	61348	62872	64410
2014-10-17 00:09:00.204	61123	61335	62856	64389
2014-10-17 00:09:00.210	61119	61339	62853	64339
2014-10-17 00:09:00.214	61126	61341	62864	64348
2014-10-17 00:09:00.220	61114	61342	62860	64399
2014-10-17 00:09:00.224	61126	61346	62857	64436
2014-10-17 00:09:00.230	61134	61348	62855	64474
2014-10-17 00:09:00.234	61119	61351	62860	64479
2014-10-17 00:09:00.240	61120	61340	62874	64468
2014-10-17 00:09:00.244	61132	61340	62891	64454
2014-10-17 00:09:00.250	61136	61355	62877	64459
2014-10-17 00:09:00.255	61118	61343	62857	64481
2014-10-17 00:09:00.259	61122	61341	62852	64453
2014-10-17 00:09:00.265	61138	61363	62826	64432
2014-10-17 00:09:00.269	61123	61356	62825	64385
2014-10-17 00:09:00.275	61115	61327	62835	64326
2014-10-17 00:09:00.279	61128	61338	62837	64331
2014-10-17 00:09:00.285	61120	61353	62855	64327
2014-10-17 00:09:00.289	61121	61339	62846	64352
2014-10-17 00:09:00.295	61134	61341	62829	64409
2014-10-17 00:09:00.299	61128	61359	62830	64444
2014-10-17 00:09:00.305	61118	61361	62832	64483
2014-10-17 00:09:00.309	61126	61342	62835	64477
2014-10-17 00:09:00.315	61129	61348	62841	64457
2014-10-17 00:09:00.319	61111	61350	62836	64458
2014-10-17 00:09:00.325	61121	61343	62824	64436
2014-10-17 00:09:00.329	61144	61351	62818	64410
2014-10-17 00:09:00.335	61138	61345	62824	64379
2014-10-17 00:09:00.339	61119	61358	62844	64365
2014-10-17 00:09:00.345	61113	61360	62850	64403
2014-10-17 00:09:00.349	61138	61345	62856	64439
2014-10-17 00:09:00.355	61148	61362	62875	64448
2014-10-17 00:09:00.359	61130	61356	62875	64437
2014-10-17 00:09:00.365	61120	61346	62893	64408
2014-10-17 00:09:00.369	61138	61363	62901	64377
2014-10-17 00:09:00.375	61152	61351	62890	64368
2014-10-17 00:09:00.380	61128	61343	62890	64390
2014-10-17 00:09:00.384	61128	61357	62863	64407
2014-10-17 00:09:00.390	61138	61346	62848	64414
2014-10-17 00:09:00.394	61135	61349	62853	64436
2014-10-17 00:09:00.400	61132	61346	62850	64449
2014-10-17 00:09:00.404	61121	61343	62847	64447
2014-10-17 00:09:00.410	61132	61371	62851	64450
2014-10-17 00:09:00.414	61130	61359	62862	64458
2014-10-17 00:09:00.420	61126	61334	62860	64450
2014-10-17 00:09:00.424	61135	61341	62861	64444
2014-10-17 00:09:00.430	61128	61355	62858	64418
2014-10-17 00:09:00.434	61126	61358	62848	64398
2014-10-17 00:09:00.440	61121	61341	62827	64417
2014-10-17 00:09:00.444	61135	61338	62812	64409
2014-10-17 00:09:00.450	61150	61355	62827	64401
2014-10-17 00:09:00.454	61136	61363	62827	64387
2014-10-17 00:09:00.460	61132	61354	62836	64376
2014-10-17 00:09:00.464	61138	61358	62853	64389
2014-10-17 00:09:00.470	61140	61355	62843	64389
2014-10-17 00:09:00.474	61136	61352	62843	64434
2014-10-17 00:09:00.480	61131	61374	62844	64469
2014-10-17 00:09:00.484	61126	61351	62848	64485
2014-10-17 00:09:00.490	61127	61355	62860	64515
2014-10-17 00:09:00.494	61137	61371	62854	64498
2014-10-17 00:09:00.500	61132	61339	62861	64457
2014-10-17 00:09:00.505	61120	61360	62881	64441
2014-10-17 00:09:00.509	61132	61373	62862	64440
2014-10-17 00:09:00.515	61146	61361	62849	64394
2014-10-17 00:09:00.519	61120	61351	62866	64350
2014-10-17 00:09:00.525	61107	61357	62854	64362
2014-10-17 00:09:00.529	61134	61368	62838	64389
2014-10-17 00:09:00.535	61142	61348	62826	64411
2014-10-17 00:09:00.539	61133	61365	62820	64395
2014-10-17 00:09:00.545	61135	61372	62835	64380
2014-10-17 00:09:00.549	61139	61352	62839	64407
2014-10-17 00:09:00.555	61139	61346	62841	64440
2014-10-17 00:09:00.559	61145	61364	62850	64447
2014-10-17 00:09:00.565	61136	61383	62863	64447
2014-10-17 00:09:00.569	61119	61365	62857	64457
2014-10-17 00:09:00.575	61132	61364	62854	64458
2014-10-17 00:09:00.579	61146	61368	62886	64476
2014-10-17 00:09:00.585	61140	61369	62887	64499
2014-10-17 00:09:00.589	61134	61365	62871	64504
2014-10-17 00:09:00.595	61131	61348	62866	64499
2014-10-17 00:09:00.599	61138	61361	62858	64477
2014-10-17 00:09:00.605	61146	61364	62882	64424
2014-10-17 00:09:00.609	61150	61363	62884	64361
2014-10-17 00:09:00.615	61149	61367	62861	64371
2014-10-17 00:09:00.619	61127	61360	62848	64412
2014-10-17 00:09:00.625	61132	61361	62828	64434
2014-10-17 00:09:00.630	61152	61362	62834	64471
2014-10-17 00:09:00.634	61147	61379	62842	64462
2014-10-17 00:09:00.640	61133	61371	62853	64429
2014-10-17 00:09:00.644	61131	61361	62879	64406
2014-10-17 00:09:00.650	61154	61371	62868	64373
2014-10-17 00:09:00.654	61149	61363	62876	64406
2014-10-17 00:09:00.660	61121	61373	62892	64456
2014-10-17 00:09:00.664	61137	61364	62857	64462
2014-10-17 00:09:00.670	61157	61363	62863	64440
2014-10-17 00:09:00.674	61139	61375	62872	64379
2014-10-17 00:09:00.680	61130	61366	62835	64350
2014-10-17 00:09:00.684	61128	61361	62834	64362
2014-10-17 00:09:00.690	61139	61359	62859	64401
2014-10-17 00:09:00.694	61152	61370	62865	64453
2014-10-17 00:09:00.700	61146	61374	62858	64483
2014-10-17 00:09:00.704	61159	61376	62858	64516
2014-10-17 00:09:00.710	61151	61371	62880	64543
2014-10-17 00:09:00.714	61116	61364	62903	64539
2014-10-17 00:09:00.720	61117	61368	62895	64514
2014-10-17 00:09:00.724	61144	61365	62892	64511
2014-10-17 00:09:00.730	61148	61378	62888	64516
2014-10-17 00:09:00.734	61136	61387	62871	64479
2014-10-17 00:09:00.740	61126	61367	62876	64452
2014-10-17 00:09:00.744	61140	61358	62880	64416
2014-10-17 00:09:00.750	61162	61380	62863	64376
2014-10-17 00:09:00.755	61150	61378	62835	64393
2014-10-17 00:09:00.759	61144	61361	62836	64383
2014-10-17 00:09:00.765	61137	61373	62853	64364
2014-10-17 00:09:00.769	61142	61379	62850	64376
2014-10-17 00:09:00.775	61153	61371	62863	64381
2014-10-17 00:09:00.779	61133	61374	62877	64400
2014-10-17 00:09:00.785	61150	61383	62873	64430
2014-10-17 00:09:00.789	61166	61370	62882	64440
2014-10-17 00:09:00.795	61141	61369	62893	64428
2014-10-17 00:09:00.799	61138	61389	62885	64442
2014-10-17 00:09:00.805	61154	61382	62872	64460
2014-10-17 00:09:00.809	61161	61365	62865	64466
2014-10-17 00:09:00.815	61147	61374	62868	64491
2014-10-17 00:09:00.819	61141	61387	62876	64518
2014-10-17 00:09:00.825	61156	61373	62857	64551
2014-10-17 00:09:00.829	61165	61384	62822	64529
2014-10-17 00:09:00.835	61150	61384	62800	64490
2014-10-17 00:09:00.839	61137	61365	62808	64477
2014-10-17 00:09:00.845	61167	61374	62837	64437
2014-10-17 00:09:00.849	61161	61375	62868	64451
2014-10-17 00:09:00.855	61127	61381	62899	64441
2014-10-17 00:09:00.859	61147	61374	62917	64398
2014-10-17 00:09:00.865	61165	61375	62916	64407
2014-10-17 00:09:00.869	61164	61379	62902	64406
2014-10-17 00:09:00.875	61146	61376	62914	64415
2014-10-17 00:09:00.880	61138	61395	62949	64425
2014-10-17 00:09:00.884	61166	61385	62945	64442
2014-10-17 00:09:00.890	61160	61380	62913	64451
2014-10-17 00:09:00.894	61149	61392	62897	64433
2014-10-17 00:09:00.900	61161	61383	62892	64427
2014-10-17 00:09:00.904	61164	61371	62897	64419
2014-10-17 00:09:00.910	61166	61376	62891	64447
2014-10-17 00:09:00.914	61162	61378	62857	64495
2014-10-17 00:09:00.920	61152	61385	62852	64527
2014-10-17 00:09:00.924	61161	61384	62859	64548
2014-10-17 00:09:00.930	61171	61365	62846	64543
2014-10-17 00:09:00.934	61157	61389	62859	64533
2014-10-17 00:09:00.940	61149	61388	62880	64524
2014-10-17 00:09:00.944	61163	61373	62886	64501
2014-10-17 00:09:00.950	61165	61387	62886	64466
2014-10-17 00:09:00.954	61160	61378	62880	64429
2014-10-17 00:09:00.960	61166	61380	62881	64404
2014-10-17 00:09:00.964	61163	61384	62887	64405
2014-10-17 00:09:00.970	61155	61380	62893	64435
2014-10-17 00:09:00.974	61162	61396	62891	64477
2014-10-17 00:09:00.980	61166	61393	62868	64511
2014-10-17 00:09:00.984	61170	61372	62880	64514
2014-10-17 00:09:00.990	61177	61381	62913	64486
2014-10-17 00:09:00.994	61165	61396	62917	64449
2014-10-17 00:09:01.000	61159	61388	62917	64435
2014-10-17 00:09:01.005	61179	61380	62902	64436
2014-10-17 00:09:01.009	61181	61394	62890	64433
2014-10-17 00:09:01.015	61158	61393	62910	64444
2014-10-17 00:09:01.019	61162	61384	62938	64457
2014-10-17 00:09:01.025	61172	61399	62945	64441
2014-10-17 00:09:01.029	61174	61383	62932	64430
2014-10-17 00:09:01.035	61177	61383	62926	64466
2014-10-17 00:09:01.039	61176	61395	62919	64517
2014-10-17 00:09:01.045	61195	61381	62883	64570
2014-10-17 00:09:01.049	61174	61395	62871	64590
2014-10-17 00:09:01.055	61173	61398	62887	64601
2014-10-17 00:09:01.059	61203	61403	62868	64589
2014-10-17 00:09:01.065	61185	61391	62838	64508
2014-10-17 00:09:01.069	61190	61376	62830	64465
2014-10-17 00:09:01.075	61179	61401	62847	64433
2014-10-17 00:09:01.079	61171	61404	62864	64394
2014-10-17 00:09:01.085	61195	61398	62895	64394
2014-10-17 00:09:01.089	61184	61385	62938	64400
2014-10-17 00:09:01.095	61182	61398	62917	64405
2014-10-17 00:09:01.099	61184	61409	62910	64406
2014-10-17 00:09:01.105	61176	61390	62931	64422
2014-10-17 00:09:01.109	61192	61411	62927	64446
2014-10-17 00:09:01.115	61187	61403	62948	64505
2014-10-17 00:09:01.119	61176	61385	62960	64584
2014-10-17 00:09:01.125	61183	61409	62950	64637
2014-10-17 00:09:01.130	61181	61398	62928	64684
2014-10-17 00:09:01.134	61200	61397	62916	64638
2014-10-17 00:09:01.140	61201	61417	62935	64546
2014-10-17 00:09:01.144	61171	61397	62936	64495
2014-10-17 00:09:01.150	61176	61401	62940	64465
2014-10-17 00:09:01.154	61189	61414	62933	64476
2014-10-17 00:09:01.160	61203	61399	62944	64468
2014-10-17 00:09:01.164	61198	61413	62980	64474
2014-10-17 00:09:01.170	61184	61412	62985	64479
2014-10-17 00:09:01.174	61193	61403	62973	64439
2014-10-17 00:09:01.180	61193	61403	62937	64453
2014-10-17 00:09:01.184	61199	61389	62923	64464
2014-10-17 00:09:01.190	61210	61414	62934	64472
2014-10-17 00:09:01.194	61198	61408	62934	64519
2014-10-17 00:09:01.200	61202	61389	62938	64530
2014-10-17 00:09:01.204	61197	61414	62927	64530
2014-10-17 00:09:01.210	61186	61414	62912	64498
2014-10-17 00:09:01.214	61205	61396	62921	64450
2014-10-17 00:09:01.220	61195	61397	62926	64442
2014-10-17 00:09:01.224	61199	61411	62915	64451
2014-10-17 00:09:01.230	61209	61409	62907	64481
2014-10-17 00:09:01.234	61190	61415	62900	64520
2014-10-17 00:09:01.240	61195	61406	62903	64548
2014-10-17 00:09:01.244	61198	61395	62896	64561
2014-10-17 00:09:01.250	61214	61417	62895	64546
2014-10-17 00:09:01.255	61214	61394	62904	64523
2014-10-17 00:09:01.259	61196	61395	62890	64515
2014-10-17 00:09:01.265	61209	61430	62911	64506
2014-10-17 00:09:01.269	61215	61400	62955	64497
2014-10-17 00:09:01.275	61223	61388	62971	64508
2014-10-17 00:09:01.279	61213	61413	62985	64537
2014-10-17 00:09:01.285	61203	61406	62973	64558
2014-10-17 00:09:01.289	61210	61399	62952	64544
2014-10-17 00:09:01.295	61220	61422	62959	64547
2014-10-17 00:09:01.299	61230	61420	62975	64530
2014-10-17 00:09:01.305	61221	61400	62982	64479
2014-10-17 00:09:01.309	61218	61412	62981	64495
2014-10-17 00:09:01.315	61213	61412	62974	64482
2014-10-17 00:09:01.319	61213	61406	62957	64459
2014-10-17 00:09:01.325	61224	61408	62957	64491
2014-10-17 00:09:01.329	61211	61430	62974	64522
2014-10-17 00:09:01.335	61205	61427	62968	64577
2014-10-17 00:09:01.339	61215	61397	62951	64575
2014-10-17 00:09:01.345	61231	61422	62937	64556
2014-10-17 00:09:01.349	61225	61422	62931	64563
2014-10-17 00:09:01.355	61214	61406	62947	64527
2014-10-17 00:09:01.359	61228	61414	62963	64487
2014-10-17 00:09:01.365	61233	61413	62959	64480
2014-10-17 00:09:01.369	61232	61414	62952	64527
2014-10-17 00:09:01.375	61224	61411	62948	64557
2014-10-17 00:09:01.380	61211	61425	62942	64542
2014-10-17 00:09:01.384	61223	61422	62936	64545
2014-10-17 00:09:01.390	61237	61415	62935	64542
2014-10-17 00:09:01.394	61230	61417	62934	64526
2014-10-17 00:09:01.400	61225	61405	62938	64521
2014-10-17 00:09:01.404	61218	61420	62966	64532
2014-10-17 00:09:01.410	61216	61421	62979	64517
2014-10-17 00:09:01.414	61220	61419	62962	64498
2014-10-17 00:09:01.420	61229	61427	62958	64533
2014-10-17 00:09:01.424	61239	61403	62959	64562
2014-10-17 00:09:01.430	61213	61411	62965	64569
2014-10-17 00:09:01.434	61216	61424	62992	64590
2014-10-17 00:09:01.440	61246	61409	62996	64590
2014-10-17 00:09:01.444	61235	61419	62992	64554
2014-10-17 00:09:01.450	61219	61423	63001	64508
2014-10-17 00:09:01.454	61224	61420	62984	64485
2014-10-17 00:09:01.460	61238	61428	62963	64503
2014-10-17 00:09:01.464	61229	61411	62962	64540
2014-10-17 00:09:01.470	61215	61407	62959	64579
2014-10-17 00:09:01.474	61233	61425	62960	64603
2014-10-17 00:09:01.480	61236	61427	62955	64579
2014-10-17 00:09:01.484	61224	61417	62944	64522
2014-10-17 00:09:01.490	61237	61420	62940	64466
2014-10-17 00:09:01.494	61245	61419	62937	64432
2014-10-17 00:09:01.500	61244	61411	62941	64422
2014-10-17 00:09:01.505	61238	61423	62939	64458
2014-10-17 00:09:01.509	61228	61414	62952	64530
2014-10-17 00:09:01.515	61256	61416	62978	64593
2014-10-17 00:09:01.519	61256	61434	62966	64641
2014-10-17 00:09:01.525	61224	61416	62955	64622
2014-10-17 00:09:01.529	61239	61419	62979	64569
2014-10-17 00:09:01.535	61256	61433	62997	64560
2014-10-17 00:09:01.539	61251	61425	62977	64561
2014-10-17 00:09:01.545	61235	61418	62940	64592
2014-10-17 00:09:01.549	61247	61424	62938	64637
2014-10-17 00:09:01.555	61257	61437	62957	64631
2014-10-17 00:09:01.559	61246	61430	62964	64583
2014-10-17 00:09:01.565	61254	61416	62968	64524
2014-10-17 00:09:01.569	61243	61426	62984	64476
2014-10-17 00:09:01.575	61238	61433	62993	64424
2014-10-17 00:09:01.579	61246	61422	62995	64400
2014-10-17 00:09:01.585	61249	61413	63008	64429
2014-10-17 00:09:01.589	61248	61415	63010	64476
2014-10-17 00:09:01.595	61227	61429	63005	64564
2014-10-17 00:09:01.599	61242	61421	62997	64635
2014-10-17 00:09:01.605	61265	61407	62994	64651
2014-10-17 00:09:01.609	61244	61421	63013	64668
2014-10-17 00:09:01.615	61244	61425	63014	64661
2014-10-17 00:09:01.619	61260	61425	63012	64630
2014-10-17 00:09:01.625	61258	61426	63013	64620
2014-10-17 00:09:01.630	61237	61414	62989	64594
2014-10-17 00:09:01.634	61231	61419	62979	64531
2014-10-17 00:09:01.640	61257	61417	62973	64491
2014-10-17 00:09:01.644	61256	61421	62963	64482
2014-10-17 00:09:01.650	61236	61431	62970	64481
2014-10-17 00:09:01.654	61245	61408	62966	64493
2014-10-17 00:09:01.660	61251	61421	62982	64511
2014-10-17 00:09:01.664	61252	61434	62995	64546
2014-10-17 00:09:01.670	61250	61415	62978	64543
2014-10-17 00:09:01.674	61242	61411	62982	64514
2014-10-17 00:09:01.680	61252	61422	62991	64537
2014-10-17 00:09:01.684	61261	61435	62994	64546
2014-10-17 00:09:01.690	61242	61415	62980	64533
2014-10-17 00:09:01.694	61248	61406	62973	64542
2014-10-17 00:09:01.700	61266	61434	62984	64544
2014-10-17 00:09:01.704	61256	61423	62975	64530
2014-10-17 00:09:01.710	61237	61404	62967	64519
2014-10-17 00:09:01.714	61236	61430	62962	64540
2014-10-17 00:09:01.720	61267	61428	62960	64582
2014-10-17 00:09:01.724	61268	61413	62969	64618
2014-10-17 00:09:01.730	61240	61417	62986	64624
2014-10-17 00:09:01.734	61246	61424	63001	64628
2014-10-17 00:09:01.740	61244	61437	63009	64655
2014-10-17 00:09:01.744	61244	61427	63010	64641
2014-10-17 00:09:01.750	61250	61425	63012	64596
2014-10-17 00:09:01.755	61233	61435	63032	64545
2014-10-17 00:09:01.759	61240	61415	63021	64516
2014-10-17 00:09:01.765	61258	61414	63001	64534
2014-10-17 00:09:01.769	61253	61433	62997	64528
2014-10-17 00:09:01.775	61242	61429	62976	64513
2014-10-17 00:09:01.779	61239	61417	62983	64513
2014-10-17 00:09:01.785	61249	61415	62987	64537
2014-10-17 00:09:01.789	61260	61428	62975	64552
2014-10-17 00:09:01.795	61255	61416	62986	64509
2014-10-17 00:09:01.799	61253	61408	62975	64499
2014-10-17 00:09:01.805	61239	61434	62971	64486
2014-10-17 00:09:01.809	61243	61423	63006	64480
2014-10-17 00:09:01.815	61262	61416	63016	64527
2014-10-17 00:09:01.819	61248	61433	63012	64551
2014-10-17 00:09:01.825	61236	61418	63006	64585
2014-10-17 00:09:01.829	61248	61419	63006	64636
2014-10-17 00:09:01.835	61261	61424	63023	64654
2014-10-17 00:09:01.839	61250	61417	63003	64636
2014-10-17 00:09:01.845	61240	61429	62975	64623
2014-10-17 00:09:01.849	61252	61428	62976	64626
2014-10-17 00:09:01.855	61252	61430	62960	64586
2014-10-17 00:09:01.859	61246	61426	62938	64555
2014-10-17 00:09:01.865	61256	61420	62934	64567
2014-10-17 00:09:01.869	61254	61424	62936	64538
2014-10-17 00:09:01.875	61237	61424	62931	64524
2014-10-17 00:09:01.880	61246	61430	62936	64538
2014-10-17 00:09:01.884	61249	61434	62959	64506
2014-10-17 00:09:01.890	61239	61430	62967	64484
2014-10-17 00:09:01.894	61241	61424	62966	64482
2014-10-17 00:09:01.900	61245	61436	62996	64507
2014-10-17 00:09:01.904	61256	61439	63024	64550
2014-10-17 00:09:01.910	61250	61434	63021	64575
2014-10-17 00:09:01.914	61234	61422	63034	64599
2014-10-17 00:09:01.920	61232	61419	63045	64588
2014-10-17 00:09:01.924	61254	61437	63015	64579
2014-10-17 00:09:01.930	61249	61418	63007	64578
2014-10-17 00:09:01.934	61241	61415	63014	64551
2014-10-17 00:09:01.940	61254	61428	62993	64537
2014-10-17 00:09:01.944	61241	61415	62960	64531
2014-10-17 00:09:01.950	61258	61426	62941	64534
2014-10-17 00:09:01.954	61250	61436	62969	64555
2014-10-17 00:09:01.960	61236	61437	63004	64564
2014-10-17 00:09:01.964	61265	61437	63003	64555
2014-10-17 00:09:01.970	61252	61424	63005	64581
2014-10-17 00:09:01.974	61258	61434	63012	64583
2014-10-17 00:09:01.980	61254	61428	63005	64567
2014-10-17 00:09:01.984	61234	61414	63003	64565
2014-10-17 00:09:01.990	61242	61435	63026	64530
2014-10-17 00:09:01.994	61235	61434	63021	64516
2014-10-17 00:09:02.000	61249	61416	62990	64527
2014-10-17 00:09:02.005	61256	61424	62973	64570
2014-10-17 00:09:02.009	61257	61435	62949	64612
2014-10-17 00:09:02.015	61265	61435	62944	64596
2014-10-17 00:09:02.019	61254	61432	62958	64584
2014-10-17 00:09:02.025	61252	61426	62965	64550
2014-10-17 00:09:02.029	61246	61423	62948	64517
2014-10-17 00:09:02.035	61250	61438	62920	64533
2014-10-17 00:09:02.039	61241	61425	62933	64551
2014-10-17 00:09:02.045	61231	61411	62960	64542
2014-10-17 00:09:02.049	61251	61436	62988	64512
2014-10-17 00:09:02.055	61253	61424	63005	64519
2014-10-17 00:09:02.059	61244	61414	62997	64521
2014-10-17 00:09:02.065	61239	61436	62990	64474
2014-10-17 00:09:02.069	61238	61430	63001	64474
2014-10-17 00:09:02.075	61234	61423	63017	64503
2014-10-17 00:09:02.079	61241	61433	63020	64526
2014-10-17 00:09:02.085	61237	61432	63003	64585
2014-10-17 00:09:02.089	61225	61429	62974	64627
2014-10-17 00:09:02.095	61227	61431	62965	64623
2014-10-17 00:09:02.099	61233	61413	62980	64610
2014-10-17 00:09:02.105	61245	61416	62987	64597
2014-10-17 00:09:02.109	61223	61443	62979	64596
2014-10-17 00:09:02.115	61228	61421	62980	64568
2014-10-17 00:09:02.119	61242	61422	63005	64536
2014-10-17 00:09:02.125	61232	61432	63012	64524
2014-10-17 00:09:02.130	61257	61409	63011	64531
2014-10-17 00:09:02.134	61243	61432	63015	64566
2014-10-17 00:09:02.140	61230	61431	62995	64559
2014-10-17 00:09:02.144	61248	61417	62978	64537
2014-10-17 00:09:02.150	61240	61442	62978	64539
2014-10-17 00:09:02.154	61237	61423	62979	64497
2014-10-17 00:09:02.160	61220	61422	62976	64456
2014-10-17 00:09:02.164	61232	61449	62963	64438
2014-10-17 00:09:02.170	61258	61419	62959	64438
2014-10-17 00:09:02.174	61221	61404	62948	64463
2014-10-17 00:09:02.180	61215	61423	62931	64486
2014-10-17 00:09:02.184	61243	61423	62947	64500
2014-10-17 00:09:02.190	61233	61415	62960	64527
2014-10-17 00:09:02.194	61221	61418	62954	64582
2014-10-17 00:09:02.200	61226	61423	62941	64601
2014-10-17 00:09:02.204	61241	61426	62931	64617
2014-10-17 00:09:02.210	61246	61418	62939	64633
2014-10-17 00:09:02.214	61225	61410	62948	64578
2014-10-17 00:09:02.220	61229	61417	62950	64565
2014-10-17 00:09:02.224	61247	61412	62959	64559
2014-10-17 00:09:02.230	61230	61408	62973	64524
2014-10-17 00:09:02.234	61220	61422	62970	64534
2014-10-17 00:09:02.240	61225	61421	62977	64536
2014-10-17 00:09:02.244	61224	61408	62995	64516
2014-10-17 00:09:02.250	61215	61398	63008	64490
2014-10-17 00:09:02.255	61220	61413	63017	64496
2014-10-17 00:09:02.259	61247	61419	62991	64517
2014-10-17 00:09:02.265	61233	61409	62976	64505
2014-10-17 00:09:02.269	61219	61411	62968	64513
2014-10-17 00:09:02.275	61227	61400	62966	64509
2014-10-17 00:09:02.279	61223	61423	62995	64491
2014-10-17 00:09:02.285	61229	61416	62980	64498
2014-10-17 00:09:02.289	61227	61392	62949	64504
2014-10-17 00:09:02.295	61217	61428	62949	64509
2014-10-17 00:09:02.299	61221	61413	62952	64522
2014-10-17 00:09:02.305	61224	61400	62948	64526
2014-10-17 00:09:02.309	61222	61437	62948	64544
2014-10-17 00:09:02.315	61225	61420	62974	64577
2014-10-17 00:09:02.319	61224	61404	62986	64592
2014-10-17 00:09:02.325	61210	61416	62983	64582
2014-10-17 00:09:02.329	61211	61400	62988	64546
2014-10-17 00:09:02.335	61223	61393	62980	64496
2014-10-17 00:09:02.339	61228	61414	62963	64449
2014-10-17 00:09:02.345	61227	61420	62952	64419
2014-10-17 00:09:02.349	61212	61407	62947	64440
2014-10-17 00:09:02.355	61207	61413	62935	64502
2014-10-17 00:09:02.359	61216	61409	62919	64556
2014-10-17 00:09:02.365	61226	61400	62913	64561
2014-10-17 00:09:02.369	61233	61399	62910	64544
2014-10-17 00:09:02.375	61215	61405	62926	64530
2014-10-17 00:09:02.380	61219	61419	62947	64501
2014-10-17 00:09:02.384	61220	61403	62939	64505
2014-10-17 00:09:02.390	61209	61403	62929	64551
2014-10-17 00:09:02.394	61222	61418	62925	64573
2014-10-17 00:09:02.400	61213	61409	62919	64582
2014-10-17 00:09:02.404	61212	61400	62919	64590
2014-10-17 00:09:02.410	61214	61395	62917	64553
2014-10-17 00:09:02.414	61198	61394	62939	64478
2014-10-17 00:09:02.420	61208	61399	62954	64444
2014-10-17 00:09:02.424	61216	61404	62958	64438
2014-10-17 00:09:02.430	61216	61390	62983	64417
2014-10-17 00:09:02.434	61209	61407	62988	64440
2014-10-17 00:09:02.440	61201	61401	62983	64500
2014-10-17 00:09:02.444	61205	61386	62995	64549
2014-10-17 00:09:02.450	61206	61420	63002	64564
2014-10-17 00:09:02.454	61210	61389	62991	64546
2014-10-17 00:09:02.460	61206	61391	62979	64541
2014-10-17 00:09:02.464	61202	61415	62978	64563
2014-10-17 00:09:02.470	61203	61393	62979	64571
2014-10-17 00:09:02.474	61200	61394	62981	64541
2014-10-17 00:09:02.480	61201	61402	62966	64534
2014-10-17 00:09:02.484	61206	61406	62921	64542
2014-10-17 00:09:02.490	61210	61385	62886	64534
2014-10-17 00:09:02.494	61203	61387	62879	64539
2014-10-17 00:09:02.500	61198	61400	62890	64528
2014-10-17 00:09:02.505	61197	61387	62908	64475
2014-10-17 00:09:02.509	61201	61395	62920	64433
2014-10-17 00:09:02.515	61218	61395	62931	64445
2014-10-17 00:09:02.519	61203	61401	62947	64457
2014-10-17 00:09:02.525	61188	61403	62948	64458
2014-10-17 00:09:02.529	61198	61389	62946	64457
2014-10-17 00:09:02.535	61203	61396	62970	64464
2014-10-17 00:09:02.539	61204	61388	62984	64505
2014-10-17 00:09:02.545	61199	61381	62958	64546
2014-10-17 00:09:02.549	61197	61390	62929	64565
2014-10-17 00:09:02.555	61197	61388	62927	64525
2014-10-17 00:09:02.559	61206	61389	62931	64490
2014-10-17 00:09:02.565	61208	61399	62942	64499
2014-10-17 00:09:02.569	61194	61385	62936	64516
2014-10-17 00:09:02.575	61202	61381	62927	64532
2014-10-17 00:09:02.579	61194	61396	62937	64507
2014-10-17 00:09:02.585	61182	61376	62943	64506
2014-10-17 00:09:02.589	61185	61387	62956	64487
2014-10-17 00:09:02.595	61184	61400	62953	64446
2014-10-17 00:09:02.599	61194	61356	62941	64457
2014-10-17 00:09:02.605	61175	61385	62931	64437
2014-10-17 00:09:02.609	61164	61413	62912	64459
2014-10-17 00:09:02.615	61196	61379	62892	64515
2014-10-17 00:09:02.619	61188	61377	62871	64540
2014-10-17 00:09:02.625	61171	61382	62893	64560
2014-10-17 00:09:02.630	61190	61386	62942	64548
2014-10-17 00:09:02.634	61194	61369	62942	64528
2014-10-17 00:09:02.640	61181	61376	62920	64494
2014-10-17 00:09:02.644	61176	61392	62932	64491
2014-10-17 00:09:02.650	61191	61358	62955	64508
2014-10-17 00:09:02.654	61192	61373	62960	64489
2014-10-17 00:09:02.660	61183	61389	62968	64479
2014-10-17 00:09:02.664	61184	61375	62972	64475
2014-10-17 00:09:02.670	61165	61372	62953	64466
2014-10-17 00:09:02.674	61169	61376	62943	64473
2014-10-17 00:09:02.680	61196	61377	62949	64487
2014-10-17 00:09:02.684	61183	61359	62947	64503
2014-10-17 00:09:02.690	61173	61372	62938	64503
2014-10-17 00:09:02.694	61174	61384	62930	64490
2014-10-17 00:09:02.700	61167	61360	62925	64496
2014-10-17 00:09:02.704	61180	61366	62920	64475
2014-10-17 00:09:02.710	61167	61384	62906	64454
2014-10-17 00:09:02.714	61150	61368	62876	64456
2014-10-17 00:09:02.720	61182	61364	62875	64421
2014-10-17 00:09:02.724	61184	61371	62872	64430
2014-10-17 00:09:02.730	61176	61370	62860	64468
2014-10-17 00:09:02.734	61178	61368	62892	64472
2014-10-17 00:09:02.740	61167	61354	62888	64481
2014-10-17 00:09:02.744	61172	61374	62884	64505
2014-10-17 00:09:02.750	61177	61380	62915	64543
2014-10-17 00:09:02.755	61180	61356	62905	64532
2014-10-17 00:09:02.759	61171	61370	62901	64470
2014-10-17 00:09:02.765	61174	61374	62918	64433
2014-10-17 00:09:02.769	61178	61364	62921	64431
2014-10-17 00:09:02.775	61156	61360	62921	64434
2014-10-17 00:09:02.779	61171	61369	62922	64437
2014-10-17 00:09:02.785	61178	61379	62911	64471
2014-10-17 00:09:02.789	61168	61363	62915	64473
2014-10-17 00:09:02.795	61172	61359	62929	64453
2014-10-17 00:09:02.799	61158	61369	62933	64484
2014-10-17 00:09:02.805	61167	61364	62928	64504
2014-10-17 00:09:02.809	61167	61348	62906	64506
2014-10-17 00:09:02.815	61156	61362	62908	64516
2014-10-17 00:09:02.819	61166	61374	62924	64532
2014-10-17 00:09:02.825	61162	61351	62925	64530
2014-10-17 00:09:02.829	61153	61349	62932	64485
2014-10-17 00:09:02.835	61149	61357	62933	64484
2014-10-17 00:09:02.839	61164	61366	62910	64498
2014-10-17 00:09:02.845	61174	61368	62886	64465
2014-10-17 00:09:02.849	61153	61369	62883	64431
2014-10-17 00:09:02.855	61156	61362	62891	64416
2014-10-17 00:09:02.859	61168	61352	62887	64401
2014-10-17 00:09:02.865	61150	61363	62857	64360
2014-10-17 00:09:02.869	61133	61345	62859	64346
2014-10-17 00:09:02.875	61151	61347	62894	64360
2014-10-17 00:09:02.880	61165	61371	62910	64389
2014-10-17 00:09:02.884	61155	61358	62911	64425
2014-10-17 00:09:02.890	61146	61344	62891	64450
2014-10-17 00:09:02.894	61141	61342	62888	64505
2014-10-17 00:09:02.900	61149	61356	62923	64522
2014-10-17 00:09:02.904	61151	61358	62935	64524
2014-10-17 00:09:02.910	61137	61353	62934	64552
2014-10-17 00:09:02.914	61128	61356	62920	64516
2014-10-17 00:09:02.920	61133	61349	62897	64476
2014-10-17 00:09:02.924	61141	61358	62880	64461
2014-10-17 00:09:02.930	61136	61355	62869	64469
2014-10-17 00:09:02.934	61128	61346	62876	64521
2014-10-17 00:09:02.940	61144	61350	62884	64538
2014-10-17 00:09:02.944	61150	61342	62891	64514
2014-10-17 00:09:02.950	61127	61346	62872	64459
2014-10-17 00:09:02.954	61130	61355	62840	64408
2014-10-17 00:09:02.960	61137	61355	62862	64385
2014-10-17 00:09:02.964	61143	61349	62868	64342
2014-10-17 00:09:02.970	61131	61332	62870	64321
2014-10-17 00:09:02.974	61123	61336	62873	64350
2014-10-17 00:09:02.980	61148	61339	62841	64388
2014-10-17 00:09:02.984	61132	61335	62836	64412
2014-10-17 00:09:02.990	61126	61333	62836	64416
2014-10-17 00:09:02.994	61136	61337	62858	64417
2014-10-17 00:09:03.000	61126	61349	62889	64440
2014-10-17 00:09:03.005	61124	61336	62858	64454
2014-10-17 00:09:03.009	61133	61328	62850	64446
2014-10-17 00:09:03.015	61141	61342	62857	64447
2014-10-17 00:09:03.019	61141	61333	62849	64478
2014-10-17 00:09:03.025	61153	61331	62861	64510
2014-10-17 00:09:03.029	61139	61338	62861	64510
2014-10-17 00:09:03.035	61116	61326	62853	64538
2014-10-17 00:09:03.039	61122	61329	62856	64562
2014-10-17 00:09:03.045	61137	61335	62872	64552
2014-10-17 00:09:03.049	61134	61318	62884	64521
2014-10-17 00:09:03.055	61114	61328	62871	64447
2014-10-17 00:09:03.059	61113	61341	62853	64392
2014-10-17 00:09:03.065	61111	61327	62835	64361
2014-10-17 00:09:03.069	61126	61334	62840	64341
2014-10-17 00:09:03.075	61129	61329	62866	64318
2014-10-17 00:09:03.079	61106	61328	62866	64280
2014-10-17 00:09:03.085	61116	61347	62873	64280
2014-10-17 00:09:03.089	61113	61329	62886	64300
2014-10-17 00:09:03.095	61106	61328	62865	64371
2014-10-17 00:09:03.099	61119	61319	62861	64454
2014-10-17 00:09:03.105	61109	61318	62871	64470
2014-10-17 00:09:03.109	61096	61347	62868	64472
2014-10-17 00:09:03.115	61107	61318	62862	64470
2014-10-17 00:09:03.119	61117	61319	62856	64456
2014-10-17 00:09:03.125	61117	61336	62859	64466
2014-10-17 00:09:03.130	61112	61310	62843	64504
2014-10-17 00:09:03.134	61111	61311	62828	64541
2014-10-17 00:09:03.140	61109	61326	62841	64557
2014-10-17 00:09:03.144	61104	61322	62838	64552
2014-10-17 00:09:03.150	61101	61307	62826	64497
2014-10-17 00:09:03.154	61098	61323	62820	64392
2014-10-17 00:09:03.160	61112	61322	62822	64320
2014-10-17 00:09:03.164	61106	61302	62834	64298
2014-10-17 00:09:03.170	61106	61321	62825	64288
2014-10-17 00:09:03.174	61123	61314	62821	64290
2014-10-17 00:09:03.180	61103	61312	62839	64302
2014-10-17 00:09:03.184	61103	61317	62824	64305
2014-10-17 00:09:03.190	61098	61317	62814	64298
2014-10-17 00:09:03.194	61078	61333	62843	64333
2014-10-17 00:09:03.200	61105	61318	62862	64389
2014-10-17 00:09:03.204	61112	61303	62868	64413
2014-10-17 00:09:03.210	61090	61312	62872	64427
2014-10-17 00:09:03.214	61098	61316	62862	64448
2014-10-17 00:09:03.220	61106	61313	62855	64461
2014-10-17 00:09:03.224	61095	61310	62846	64457
2014-10-17 00:09:03.230	61098	61301	62835	64472
2014-10-17 00:09:03.234	61090	61308	62830	64487
2014-10-17 00:09:03.240	61090	61310	62816	64507
2014-10-17 00:09:03.244	61086	61303	62819	64498
2014-10-17 00:09:03.250	61078	61308	62821	64439
2014-10-17 00:09:03.255	61089	61308	62813	64421
2014-10-17 00:09:03.259	61093	61302	62825	64395
2014-10-17 00:09:03.265	61100	61291	62813	64399
2014-10-17 00:09:03.269	61070	61307	62795	64409
2014-10-17 00:09:03.275	61070	61305	62793	64365
2014-10-17 00:09:03.279	61093	61290	62800	64353
2014-10-17 00:09:03.285	61070	61295	62823	64323
2014-10-17 00:09:03.289	61080	61283	62815	64309
2014-10-17 00:09:03.295	61074	61305	62797	64310
2014-10-17 00:09:03.299	61063	61301	62790	64268
2014-10-17 00:09:03.305	61075	61261	62785	64279
2014-10-17 00:09:03.309	61072	61290	62797	64312
2014-10-17 00:09:03.315	61075	61300	62807	64366
2014-10-17 00:09:03.319	61064	61285	62816	64447
2014-10-17 00:09:03.325	61062	61290	62820	64462
2014-10-17 00:09:03.329	61068	61283	62800	64466
2014-10-17 00:09:03.335	61066	61280	62795	64471
2014-10-17 00:09:03.339	61076	61275	62797	64456
2014-10-17 00:09:03.345	61072	61268	62783	64456
2014-10-17 00:09:03.349	61079	61276	62791	64437
2014-10-17 00:09:03.355	61076	61285	62807	64428
2014-10-17 00:09:03.359	61055	61276	62793	64402
2014-10-17 00:09:03.365	61070	61265	62777	64356
2014-10-17 00:09:03.369	61075	61273	62780	64324
2014-10-17 00:09:03.375	61064	61269	62795	64267
2014-10-17 00:09:03.380	61048	61274	62805	64293
2014-10-17 00:09:03.384	61047	61288	62784	64342
2014-10-17 00:09:03.390	61068	61273	62778	64351
2014-10-17 00:09:03.394	61058	61274	62790	64353
2014-10-17 00:09:03.400	61047	61262	62781	64302
2014-10-17 00:09:03.404	61057	61249	62772	64305
2014-10-17 00:09:03.410	61058	61286	62776	64353
2014-10-17 00:09:03.414	61057	61273	62806	64385
2014-10-17 00:09:03.420	61062	61247	62831	64418
2014-10-17 00:09:03.424	61053	61286	62809	64458
2014-10-17 00:09:03.430	61054	61281	62783	64474
2014-10-17 00:09:03.434	61059	61240	62792	64423
2014-10-17 00:09:03.440	61030	61260	62799	64396
2014-10-17 00:09:03.444	61041	61279	62781	64347
2014-10-17 00:09:03.450	61057	61264	62772	64304
2014-10-17 00:09:03.454	61040	61254	62769	64328
2014-10-17 00:09:03.460	61037	61262	62756	64314
2014-10-17 00:09:03.464	61046	61268	62747	64331
2014-10-17 00:09:03.470	61053	61246	62735	64344
2014-10-17 00:09:03.474	61046	61256	62736	64301
2014-10-17 00:09:03.480	61043	61270	62757	64297
2014-10-17 00:09:03.484	61034	61251	62767	64321
2014-10-17 00:09:03.490	61033	61249	62762	64368
2014-10-17 00:09:03.494	61036	61250	62766	64375
2014-10-17 00:09:03.500	61042	61249	62778	64363
2014-10-17 00:09:03.505	61036	61248	62766	64372
2014-10-17 00:09:03.509	61017	61255	62745	64307
2014-10-17 00:09:03.515	61026	61257	62763	64274
2014-10-17 00:09:03.519	61029	61253	62789	64325
2014-10-17 00:09:03.525	61031	61257	62778	64366
2014-10-17 00:09:03.529	61013	61253	62776	64372
2014-10-17 00:09:03.535	61011	61250	62769	64341
2014-10-17 00:09:03.539	61032	61243	62735	64328
2014-10-17 00:09:03.545	61028	61245	62738	64319
2014-10-17 00:09:03.549	61020	61243	62738	64306
2014-10-17 00:09:03.555	61014	61243	62731	64320
2014-10-17 00:09:03.559	61022	61255	62755	64318
2014-10-17 00:09:03.565	61021	61245	62759	64313
2014-10-17 00:09:03.569	61018	61247	62762	64318
2014-10-17 00:09:03.575	61002	61243	62772	64322
2014-10-17 00:09:03.579	60992	61243	62770	64346
2014-10-17 00:09:03.585	61023	61256	62772	64370
2014-10-17 00:09:03.589	61011	61234	62774	64387
2014-10-17 00:09:03.595	61007	61243	62763	64402
2014-10-17 00:09:03.599	61013	61265	62737	64351
2014-10-17 00:09:03.605	60992	61235	62730	64268
2014-10-17 00:09:03.609	61018	61229	62717	64256
2014-10-17 00:09:03.615	61023	61236	62706	64287
2014-10-17 00:09:03.619	61002	61225	62737	64318
2014-10-17 00:09:03.625	61009	61238	62745	64336
2014-10-17 00:09:03.630	61004	61232	62761	64340
2014-10-17 00:09:03.634	61004	61218	62776	64342
2014-10-17 00:09:03.640	61011	61226	62760	64306
2014-10-17 00:09:03.644	61007	61223	62764	64247
2014-10-17 00:09:03.650	61009	61215	62750	64234
2014-10-17 00:09:03.654	61008	61233	62742	64286
2014-10-17 00:09:03.660	61000	61240	62757	64324
2014-10-17 00:09:03.664	61000	61222	62756	64313
2014-10-17 00:09:03.670	60994	61226	62759	64316
2014-10-17 00:09:03.674	60994	61218	62732	64327
2014-10-17 00:09:03.680	61004	61228	62701	64344
2014-10-17 00:09:03.684	60995	61232	62713	64365
2014-10-17 00:09:03.690	60998	61201	62725	64379
2014-10-17 00:09:03.694	61002	61223	62725	64386
2014-10-17 00:09:03.700	60985	61239	62699	64358
2014-10-17 00:09:03.704	60980	61211	62693	64337
2014-10-17 00:09:03.710	61003	61208	62700	64342
2014-10-17 00:09:03.714	61003	61229	62681	64316
2014-10-17 00:09:03.720	60983	61211	62690	64258
2014-10-17 00:09:03.724	61002	61191	62685	64235
2014-10-17 00:09:03.730	60997	61225	62673	64220
2014-10-17 00:09:03.734	60977	61220	62683	64221
2014-10-17 00:09:03.740	60985	61214	62680	64254
2014-10-17 00:09:03.744	60992	61213	62692	64261
2014-10-17 00:09:03.750	60994	61183	62703	64290
2014-10-17 00:09:03.755	60975	61216	62706	64291
2014-10-17 00:09:03.759	60965	61212	62717	64256
2014-10-17 00:09:03.765	60983	61178	62712	64248
2014-10-17 00:09:03.769	60978	61212	62726	64243
2014-10-17 00:09:03.775	60967	61207	62742	64274
2014-10-17 00:09:03.779	60954	61196	62740	64299
2014-10-17 00:09:03.785	60957	61205	62730	64302
2014-10-17 00:09:03.789	60989	61193	62699	64321
2014-10-17 00:09:03.795	60981	61197	62711	64327
2014-10-17 00:09:03.799	60962	61200	62728	64330
2014-10-17 00:09:03.805	60958	61208	62709	64355
2014-10-17 00:09:03.809	60966	61197	62704	64372
2014-10-17 00:09:03.815	60974	61190	62685	64351
2014-10-17 00:09:03.819	60960	61217	62681	64333
2014-10-17 00:09:03.825	60973	61213	62691	64317
2014-10-17 00:09:03.829	60968	61199	62683	64267
2014-10-17 00:09:03.835	60951	61204	62688	64230
2014-10-17 00:09:03.839	60965	61201	62689	64237
2014-10-17 00:09:03.845	60962	61184	62701	64246
2014-10-17 00:09:03.849	60969	61191	62714	64227
2014-10-17 00:09:03.855	60975	61207	62721	64213
2014-10-17 00:09:03.859	60967	61180	62726	64207
2014-10-17 00:09:03.865	60965	61190	62706	64188
2014-10-17 00:09:03.869	60959	61205	62703	64186
2014-10-17 00:09:03.875	60966	61177	62708	64192
2014-10-17 00:09:03.880	60966	61187	62710	64214
2014-10-17 00:09:03.884	60967	61186	62701	64266
2014-10-17 00:09:03.890	60970	61176	62672	64289
2014-10-17 00:09:03.894	60949	61194	62657	64330
2014-10-17 00:09:03.900	60954	61188	62650	64390
2014-10-17 00:09:03.904	60964	61179	62667	64394
2014-10-17 00:09:03.910	60940	61175	62688	64363
2014-10-17 00:09:03.914	60955	61185	62678	64329
2014-10-17 00:09:03.920	60973	61185	62676	64308
2014-10-17 00:09:03.924	60962	61182	62676	64332
2014-10-17 00:09:03.930	60970	61191	62681	64372
2014-10-17 00:09:03.934	60944	61179	62677	64356
2014-10-17 00:09:03.940	60936	61187	62672	64318
2014-10-17 00:09:03.944	60952	61181	62680	64284
2014-10-17 00:09:03.950	60941	61169	62664	64202
2014-10-17 00:09:03.954	60961	61188	62687	64117
2014-10-17 00:09:03.960	60957	61186	62730	64085
2014-10-17 00:09:03.964	60937	61183	62709	64088
2014-10-17 00:09:03.970	60951	61179	62684	64114
2014-10-17 00:09:03.974	60949	61164	62694	64180
2014-10-17 00:09:03.980	60946	61162	62705	64275
2014-10-17 00:09:03.984	60946	61166	62693	64323
2014-10-17 00:09:03.990	60935	61170	62676	64328
2014-10-17 00:09:03.994	60940	61169	62676	64315
2014-10-17 00:09:04.000	60949	61160	62672	64303
2014-10-17 00:09:04.005	60947	61167	62687	64308
2014-10-17 00:09:04.009	60945	61170	62691	64293
2014-10-17 00:09:04.015	60935	61170	62673	64297
2014-10-17 00:09:04.019	60950	61169	62682	64323
2014-10-17 00:09:04.025	60975	61151	62678	64350
2014-10-17 00:09:04.029	60951	61168	62671	64354
2014-10-17 00:09:04.035	60944	61175	62685	64312
2014-10-17 00:09:04.039	60961	61153	62682	64268
2014-10-17 00:09:04.045	60955	61168	62701	64227
2014-10-17 00:09:04.049	60950	61184	62729	64192
2014-10-17 00:09:04.055	60945	61179	62728	64151
2014-10-17 00:09:04.059	60960	61154	62713	64116
2014-10-17 00:09:04.065	60960	61157	62683	64116
2014-10-17 00:09:04.069	60937	61183	62663	64128
2014-10-17 00:09:04.075	60941	61173	62657	64137
2014-10-17 00:09:04.079	60940	61158	62658	64172
2014-10-17 00:09:04.085	60937	61166	62667	64252
2014-10-17 00:09:04.089	60928	61173	62663	64311
2014-10-17 00:09:04.095	60920	61154	62657	64356
2014-10-17 00:09:04.099	60948	61162	62644	64366
2014-10-17 00:09:04.105	60946	61176	62650	64340
2014-10-17 00:09:04.109	60929	61153	62666	64345
2014-10-17 00:09:04.115	60949	61169	62667	64338
2014-10-17 00:09:04.119	60951	61172	62686	64313
2014-10-17 00:09:04.125	60940	61154	62671	64282
2014-10-17 00:09:04.130	60934	61164	62664	64260
2014-10-17 00:09:04.134	60934	61161	62685	64243
2014-10-17 00:09:04.140	60945	61167	62663	64214
2014-10-17 00:09:04.144	60948	61166	62640	64226
2014-10-17 00:09:04.150	60947	61155	62632	64240
2014-10-17 00:09:04.154	60941	61171	62635	64201
2014-10-17 00:09:04.160	60940	61164	62645	64162
2014-10-17 00:09:04.164	60933	61158	62649	64160
2014-10-17 00:09:04.170	60924	61174	62642	64197
2014-10-17 00:09:04.174	60954	61161	62628	64244
2014-10-17 00:09:04.180	60952	61162	62642	64262
2014-10-17 00:09:04.184	60916	61170	62648	64269
2014-10-17 00:09:04.190	60910	61155	62659	64261
2014-10-17 00:09:04.194	60926	61161	62693	64242
2014-10-17 00:09:04.200	60947	61171	62693	64234
2014-10-17 00:09:04.204	60948	61154	62700	64237
2014-10-17 00:09:04.210	60933	61176	62702	64244
2014-10-17 00:09:04.214	60933	61180	62680	64256
2014-10-17 00:09:04.220	60958	61153	62684	64295
2014-10-17 00:09:04.224	60939	61174	62683	64294
2014-10-17 00:09:04.230	60912	61166	62686	64284
2014-10-17 00:09:04.234	60941	61158	62690	64293
2014-10-17 00:09:04.240	60941	61163	62661	64229
2014-10-17 00:09:04.244	60934	61153	62654	64223
2014-10-17 00:09:04.250	60942	61159	62666	64255
2014-10-17 00:09:04.255	60934	61151	62662	64264
2014-10-17 00:09:04.259	60931	61164	62665	64307
2014-10-17 00:09:04.265	60930	61169	62650	64282
2014-10-17 00:09:04.269	60932	61155	62635	64233
2014-10-17 00:09:04.275	60935	61172	62643	64204
2014-10-17 00:09:04.279	60933	61163	62637	64168
2014-10-17 00:09:04.285	60941	61157	62648	64147
2014-10-17 00:09:04.289	60945	61159	62657	64153
2014-10-17 00:09:04.295	60935	61142	62652	64185
2014-10-17 00:09:04.299	60934	61155	62672	64191
2014-10-17 00:09:04.305	60946	61161	62671	64198
2014-10-17 00:09:04.309	60954	61150	62671	64216
2014-10-17 00:09:04.315	60932	61155	62669	64243
2014-10-17 00:09:04.319	60920	61154	62638	64303
2014-10-17 00:09:04.325	60955	61160	62622	64313
2014-10-17 00:09:04.329	60951	61160	62634	64316
2014-10-17 00:09:04.335	60923	61152	62664	64339
2014-10-17 00:09:04.339	60947	61159	62676	64341
2014-10-17 00:09:04.345	60942	61154	62664	64322
2014-10-17 00:09:04.349	60929	61152	62658	64269
2014-10-17 00:09:04.355	60950	61156	62659	64241
2014-10-17 00:09:04.359	60936	61158	62679	64196
2014-10-17 00:09:04.365	60928	61165	62691	64142
2014-10-17 00:09:04.369	60934	61157	62678	64132
2014-10-17 00:09:04.375	60932	61148	62680	64149
2014-10-17 00:09:04.380	60947	61167	62675	64195
2014-10-17 00:09:04.384	60941	61156	62696	64215
2014-10-17 00:09:04.390	60934	61144	62735	64249
2014-10-17 00:09:04.394	60944	61166	62704	64280
2014-10-17 00:09:04.400	60952	61164	62681	64271
2014-10-17 00:09:04.404	60943	61154	62677	64287
2014-10-17 00:09:04.410	60926	61160	62654	64259
2014-10-17 00:09:04.414	60932	61171	62652	64219
2014-10-17 00:09:04.420	60943	61167	62652	64225
2014-10-17 00:09:04.424	60953	61155	62649	64255
2014-10-17 00:09:04.430	60963	61156	62646	64295
2014-10-17 00:09:04.434	60935	61159	62655	64316
2014-10-17 00:09:04.440	60931	61161	62666	64328
2014-10-17 00:09:04.444	60949	61176	62666	64304
2014-10-17 00:09:04.450	60944	61169	62681	64256
2014-10-17 00:09:04.454	60953	61155	62693	64214
2014-10-17 00:09:04.460	60944	61181	62682	64174
2014-10-17 00:09:04.464	60947	61176	62646	64181
2014-10-17 00:09:04.470	60954	61156	62632	64213
2014-10-17 00:09:04.474	60939	61172	62668	64244
2014-10-17 00:09:04.480	60949	61165	62681	64257
2014-10-17 00:09:04.484	60943	61159	62671	64243
2014-10-17 00:09:04.490	60942	61178	62672	64229
2014-10-17 00:09:04.494	60947	61167	62673	64222
2014-10-17 00:09:04.500	60940	61163	62660	64245
2014-10-17 00:09:04.505	60950	61170	62652	64251
2014-10-17 00:09:04.509	60944	61158	62649	64247
2014-10-17 00:09:04.515	60943	61159	62644	64280
2014-10-17 00:09:04.519	60942	61172	62660	64302
2014-10-17 00:09:04.525	60945	61166	62693	64311
2014-10-17 00:09:04.529	60955	61152	62717	64304
2014-10-17 00:09:04.535	60947	61161	62704	64295
2014-10-17 00:09:04.539	60951	61172	62668	64287
2014-10-17 00:09:04.545	60952	61171	62668	64257
2014-10-17 00:09:04.549	60948	61175	62678	64239
2014-10-17 00:09:04.555	60955	61188	62677	64218
2014-10-17 00:09:04.559	60964	61181	62683	64205
2014-10-17 00:09:04.565	60957	61156	62676	64219
2014-10-17 00:09:04.569	60945	61167	62670	64221
2014-10-17 00:09:04.575	60947	61186	62668	64237
2014-10-17 00:09:04.579	60961	61172	62675	64259
2014-10-17 00:09:04.585	60963	61164	62682	64251
2014-10-17 00:09:04.589	60945	61184	62669	64229
2014-10-17 00:09:04.595	60958	61173	62671	64224
2014-10-17 00:09:04.599	60975	61176	62676	64237
2014-10-17 00:09:04.605	60961	61191	62680	64261
2014-10-17 00:09:04.609	60950	61159	62670	64302
2014-10-17 00:09:04.615	60953	61174	62668	64306
2014-10-17 00:09:04.619	60967	61191	62669	64278
2014-10-17 00:09:04.625	60958	61173	62655	64242
2014-10-17 00:09:04.630	60955	61176	62669	64190
2014-10-17 00:09:04.634	60968	61175	62690	64202
2014-10-17 00:09:04.640	60973	61183	62713	64242
2014-10-17 00:09:04.644	60964	61175	62714	64279
2014-10-17 00:09:04.650	60949	61156	62702	64342
2014-10-17 00:09:04.654	60954	61174	62704	64359
2014-10-17 00:09:04.660	60960	61178	62673	64339
2014-10-17 00:09:04.664	60960	61163	62647	64299
2014-10-17 00:09:04.670	60961	61178	62645	64265
2014-10-17 00:09:04.674	60960	61191	62659	64257
2014-10-17 00:09:04.680	60959	61169	62654	64216
2014-10-17 00:09:04.684	60956	61185	62646	64187
2014-10-17 00:09:04.690	60966	61202	62660	64196
2014-10-17 00:09:04.694	60956	61159	62653	64185
2014-10-17 00:09:04.700	60956	61171	62673	64174
2014-10-17 00:09:04.704	60974	61197	62690	64182
2014-10-17 00:09:04.710	60984	61166	62690	64197
2014-10-17 00:09:04.714	60984	61176	62708	64233
2014-10-17 00:09:04.720	60967	61194	62715	64263
2014-10-17 00:09:04.724	60973	61176	62728	64311
2014-10-17 00:09:04.730	60972	61175	62716	64367
2014-10-17 00:09:04.734	60968	61184	62699	64366
2014-10-17 00:09:04.740	60985	61178	62694	64360
2014-10-17 00:09:04.744	60991	61179	62667	64387
2014-10-17 00:09:04.750	60976	61175	62663	64406
2014-10-17 00:09:04.755	60958	61168	62670	64365
2014-10-17 00:09:04.759	60976	61176	62660	64325
2014-10-17 00:09:04.765	60995	61181	62667	64277
2014-10-17 00:09:04.769	60995	61186	62697	64189
2014-10-17 00:09:04.775	60978	61172	62708	64168
2014-10-17 00:09:04.779	60983	61176	62702	64189
2014-10-17 00:09:04.785	60994	61191	62699	64208
2014-10-17 00:09:04.789	60969	61179	62694	64192
2014-10-17 00:09:04.795	60976	61192	62701	64155
2014-10-17 00:09:04.799	60980	61193	62716	64182
2014-10-17 00:09:04.805	60969	61185	62733	64223
2014-10-17 00:09:04.809	60984	61195	62749	64294
2014-10-17 00:09:04.815	60980	61194	62739	64383
2014-10-17 00:09:04.819	60976	61193	62709	64413
2014-10-17 00:09:04.825	60977	61195	62710	64401
2014-10-17 00:09:04.829	60970	61195	62725	64359
2014-10-17 00:09:04.835	60991	61185	62709	64339
2014-10-17 00:09:04.839	60996	61181	62694	64320
2014-10-17 00:09:04.845	60986	61190	62674	64264
2014-10-17 00:09:04.849	60988	61194	62654	64223
2014-10-17 00:09:04.855	60984	61178	62658	64228
2014-10-17 00:09:04.859	61002	61186	62674	64297
2014-10-17 00:09:04.865	60996	61210	62708	64350
2014-10-17 00:09:04.869	60981	61192	62719	64365
2014-10-17 00:09:04.875	60994	61186	62712	64351
2014-10-17 00:09:04.880	61002	61204	62708	64273
2014-10-17 00:09:04.884	60995	61183	62702	64227
2014-10-17 00:09:04.890	60973	61179	62733	64185
2014-10-17 00:09:04.894	60990	61195	62751	64152
2014-10-17 00:09:04.900	61010	61188	62758	64164
2014-10-17 00:09:04.904	60994	61188	62766	64197
2014-10-17 00:09:04.910	60990	61194	62757	64288
2014-10-17 00:09:04.914	60991	61201	62764	64325
2014-10-17 00:09:04.920	61001	61187	62744	64337
2014-10-17 00:09:04.924	60996	61184	62716	64340
2014-10-17 00:09:04.930	60980	61199	62709	64282
2014-10-17 00:09:04.934	60998	61185	62681	64258
2014-10-17 00:09:04.940	61010	61188	62682	64260
2014-10-17 00:09:04.944	60995	61189	62699	64289
2014-10-17 00:09:04.950	60986	61195	62691	64343
2014-10-17 00:09:04.954	60996	61214	62701	64370
2014-10-17 00:09:04.960	61016	61188	62716	64367
2014-10-17 00:09:04.964	61010	61189	62732	64352
2014-10-17 00:09:04.970	60999	61210	62724	64338
2014-10-17 00:09:04.974	61015	61197	62709	64305
2014-10-17 00:09:04.980	61016	61185	62721	64276
2014-10-17 00:09:04.984	61005	61194	62715	64262
2014-10-17 00:09:04.990	61006	61204	62720	64262
2014-10-17 00:09:04.994	61015	61194	62727	64288
[truncated: 11,600 more rows]
