# Supplementary material for: Seismic monitoring of small alpine rockfalls – validity, precision and limitations
Source: Copernicus journal article supplement (doi:10.5194/esurf-5-653-2017), 2017-10-16
Supplement: Supplementary file 2 [file esurf-5-653-2017-supplement.zip › event_10.txt]

Time	LAU02	LAU03	LAU04	LAU05
2014-10-01 09:22:35.005	59704	64477	62510	64415
2014-10-01 09:22:35.009	59746	64469	62477	64374
2014-10-01 09:22:35.015	59697	64468	62474	64341
2014-10-01 09:22:35.019	59736	64464	62489	64322
2014-10-01 09:22:35.025	59715	64457	62481	64243
2014-10-01 09:22:35.029	59691	64454	62471	64166
2014-10-01 09:22:35.035	59729	64468	62458	64123
2014-10-01 09:22:35.039	59714	64482	62449	64115
2014-10-01 09:22:35.045	59732	64480	62427	64116
2014-10-01 09:22:35.049	59718	64452	62386	64133
2014-10-01 09:22:35.055	59740	64467	62379	64152
2014-10-01 09:22:35.059	59723	64468	62401	64159
2014-10-01 09:22:35.065	59715	64440	62423	64176
2014-10-01 09:22:35.069	59778	64464	62450	64184
2014-10-01 09:22:35.075	59705	64475	62450	64252
2014-10-01 09:22:35.079	59719	64466	62439	64283
2014-10-01 09:22:35.085	59737	64452	62459	64238
2014-10-01 09:22:35.089	59700	64477	62482	64274
2014-10-01 09:22:35.095	59743	64467	62477	64303
2014-10-01 09:22:35.099	59708	64428	62449	64296
2014-10-01 09:22:35.105	59720	64478	62423	64323
2014-10-01 09:22:35.109	59737	64472	62446	64302
2014-10-01 09:22:35.115	59710	64456	62472	64271
2014-10-01 09:22:35.119	59736	64458	62434	64266
2014-10-01 09:22:35.125	59701	64452	62439	64233
2014-10-01 09:22:35.130	59726	64460	62475	64220
2014-10-01 09:22:35.134	59740	64450	62448	64222
2014-10-01 09:22:35.140	59682	64471	62447	64212
2014-10-01 09:22:35.144	59739	64451	62448	64197
2014-10-01 09:22:35.150	59732	64466	62439	64140
2014-10-01 09:22:35.154	59701	64480	62471	64088
2014-10-01 09:22:35.160	59746	64435	62469	64089
2014-10-01 09:22:35.164	59723	64470	62491	64129
2014-10-01 09:22:35.170	59698	64482	62518	64189
2014-10-01 09:22:35.174	59719	64459	62489	64234
2014-10-01 09:22:35.180	59730	64438	62485	64267
2014-10-01 09:22:35.184	59724	64455	62464	64287
2014-10-01 09:22:35.190	59718	64477	62448	64271
2014-10-01 09:22:35.194	59706	64436	62481	64221
2014-10-01 09:22:35.200	59723	64466	62494	64200
2014-10-01 09:22:35.204	59744	64469	62503	64227
2014-10-01 09:22:35.210	59708	64427	62511	64231
2014-10-01 09:22:35.214	59692	64469	62498	64228
2014-10-01 09:22:35.220	59728	64466	62493	64253
2014-10-01 09:22:35.224	59721	64447	62489	64263
2014-10-01 09:22:35.230	59699	64443	62466	64287
2014-10-01 09:22:35.234	59722	64429	62458	64342
2014-10-01 09:22:35.240	59729	64480	62462	64333
2014-10-01 09:22:35.244	59743	64477	62448	64274
2014-10-01 09:22:35.250	59714	64440	62445	64224
2014-10-01 09:22:35.255	59696	64473	62438	64177
2014-10-01 09:22:35.259	59749	64483	62459	64168
2014-10-01 09:22:35.265	59710	64427	62510	64173
2014-10-01 09:22:35.269	59706	64425	62501	64158
2014-10-01 09:22:35.275	59735	64465	62450	64154
2014-10-01 09:22:35.279	59707	64460	62422	64168
2014-10-01 09:22:35.285	59737	64432	62425	64192
2014-10-01 09:22:35.289	59727	64436	62430	64221
2014-10-01 09:22:35.295	59706	64470	62419	64222
2014-10-01 09:22:35.299	59718	64448	62398	64194
2014-10-01 09:22:35.305	59714	64464	62399	64219
2014-10-01 09:22:35.309	59730	64453	62443	64275
2014-10-01 09:22:35.315	59713	64414	62481	64296
2014-10-01 09:22:35.319	59710	64461	62460	64313
2014-10-01 09:22:35.325	59721	64446	62439	64300
2014-10-01 09:22:35.329	59730	64462	62446	64285
2014-10-01 09:22:35.335	59712	64471	62435	64302
2014-10-01 09:22:35.339	59694	64452	62431	64270
2014-10-01 09:22:35.345	59725	64457	62443	64190
2014-10-01 09:22:35.349	59721	64450	62442	64150
2014-10-01 09:22:35.355	59720	64472	62438	64181
2014-10-01 09:22:35.359	59711	64443	62443	64191
2014-10-01 09:22:35.365	59712	64458	62484	64173
2014-10-01 09:22:35.369	59733	64469	62495	64170
2014-10-01 09:22:35.375	59718	64439	62466	64151
2014-10-01 09:22:35.380	59735	64468	62489	64149
2014-10-01 09:22:35.384	59713	64454	62493	64169
2014-10-01 09:22:35.390	59711	64449	62472	64213
2014-10-01 09:22:35.394	59738	64435	62464	64275
2014-10-01 09:22:35.400	59703	64426	62459	64296
2014-10-01 09:22:35.404	59722	64466	62471	64275
2014-10-01 09:22:35.410	59723	64449	62441	64249
2014-10-01 09:22:35.414	59711	64452	62432	64256
2014-10-01 09:22:35.420	59740	64457	62454	64279
2014-10-01 09:22:35.424	59726	64435	62455	64306
2014-10-01 09:22:35.430	59707	64460	62472	64281
2014-10-01 09:22:35.434	59698	64442	62469	64209
2014-10-01 09:22:35.440	59729	64441	62477	64202
2014-10-01 09:22:35.444	59746	64482	62484	64208
2014-10-01 09:22:35.450	59703	64458	62439	64190
2014-10-01 09:22:35.454	59722	64453	62430	64169
2014-10-01 09:22:35.460	59741	64466	62471	64154
2014-10-01 09:22:35.464	59709	64447	62467	64202
2014-10-01 09:22:35.470	59707	64457	62442	64229
2014-10-01 09:22:35.474	59719	64455	62463	64205
2014-10-01 09:22:35.480	59735	64444	62470	64222
2014-10-01 09:22:35.484	59699	64467	62473	64250
2014-10-01 09:22:35.490	59693	64462	62481	64249
2014-10-01 09:22:35.494	59738	64437	62452	64219
2014-10-01 09:22:35.500	59724	64453	62434	64195
2014-10-01 09:22:35.505	59710	64465	62459	64215
2014-10-01 09:22:35.509	59690	64442	62474	64228
2014-10-01 09:22:35.515	59726	64435	62453	64244
2014-10-01 09:22:35.519	59724	64452	62466	64264
2014-10-01 09:22:35.525	59683	64444	62501	64251
2014-10-01 09:22:35.529	59734	64443	62517	64250
2014-10-01 09:22:35.535	59720	64457	62512	64243
2014-10-01 09:22:35.539	59704	64454	62483	64232
2014-10-01 09:22:35.545	59712	64437	62474	64233
2014-10-01 09:22:35.549	59720	64439	62472	64220
2014-10-01 09:22:35.555	59745	64480	62452	64206
2014-10-01 09:22:35.559	59715	64444	62417	64199
2014-10-01 09:22:35.565	59719	64424	62375	64206
2014-10-01 09:22:35.569	59731	64472	62364	64211
2014-10-01 09:22:35.575	59721	64465	62376	64206
2014-10-01 09:22:35.579	59729	64461	62382	64214
2014-10-01 09:22:35.585	59707	64467	62391	64224
2014-10-01 09:22:35.589	59728	64455	62407	64215
2014-10-01 09:22:35.595	59754	64448	62410	64194
2014-10-01 09:22:35.599	59700	64455	62427	64209
2014-10-01 09:22:35.605	59711	64448	62469	64234
2014-10-01 09:22:35.609	59748	64459	62480	64240
2014-10-01 09:22:35.615	59708	64465	62469	64260
2014-10-01 09:22:35.619	59702	64439	62479	64249
2014-10-01 09:22:35.625	59714	64450	62508	64201
2014-10-01 09:22:35.630	59722	64450	62515	64188
2014-10-01 09:22:35.634	59747	64452	62488	64225
2014-10-01 09:22:35.640	59722	64433	62475	64235
2014-10-01 09:22:35.644	59708	64441	62485	64205
2014-10-01 09:22:35.650	59739	64464	62484	64211
2014-10-01 09:22:35.654	59740	64444	62426	64213
2014-10-01 09:22:35.660	59710	64469	62394	64215
2014-10-01 09:22:35.664	59701	64456	62453	64236
2014-10-01 09:22:35.670	59737	64452	62468	64215
2014-10-01 09:22:35.674	59726	64450	62434	64185
2014-10-01 09:22:35.680	59684	64438	62410	64167
2014-10-01 09:22:35.684	59719	64464	62431	64184
2014-10-01 09:22:35.690	59740	64446	62468	64228
2014-10-01 09:22:35.694	59727	64465	62440	64227
2014-10-01 09:22:35.700	59709	64473	62433	64217
2014-10-01 09:22:35.704	59680	64454	62419	64230
2014-10-01 09:22:35.710	59715	64471	62409	64239
2014-10-01 09:22:35.714	59741	64464	62470	64251
2014-10-01 09:22:35.720	59700	64455	62484	64256
2014-10-01 09:22:35.724	59679	64444	62477	64241
2014-10-01 09:22:35.730	59713	64465	62460	64237
2014-10-01 09:22:35.734	59742	64458	62444	64243
2014-10-01 09:22:35.740	59695	64441	62476	64261
2014-10-01 09:22:35.744	59694	64475	62442	64278
2014-10-01 09:22:35.750	59724	64452	62418	64270
2014-10-01 09:22:35.755	59696	64446	62463	64211
2014-10-01 09:22:35.759	59715	64457	62459	64155
2014-10-01 09:22:35.765	59727	64446	62415	64179
2014-10-01 09:22:35.769	59695	64441	62403	64201
2014-10-01 09:22:35.775	59687	64436	62431	64186
2014-10-01 09:22:35.779	59727	64476	62406	64174
2014-10-01 09:22:35.785	59729	64456	62381	64175
2014-10-01 09:22:35.789	59696	64420	62405	64185
2014-10-01 09:22:35.795	59703	64462	62399	64220
2014-10-01 09:22:35.799	59674	64467	62372	64252
2014-10-01 09:22:35.805	59699	64442	62343	64220
2014-10-01 09:22:35.809	59729	64434	62372	64212
2014-10-01 09:22:35.815	59709	64460	62414	64213
2014-10-01 09:22:35.819	59722	64478	62397	64220
2014-10-01 09:22:35.825	59707	64445	62390	64226
2014-10-01 09:22:35.829	59692	64436	62394	64164
2014-10-01 09:22:35.835	59719	64466	62408	64174
2014-10-01 09:22:35.839	59735	64457	62433	64225
2014-10-01 09:22:35.845	59696	64443	62434	64253
2014-10-01 09:22:35.849	59694	64454	62441	64285
2014-10-01 09:22:35.855	59719	64450	62462	64284
2014-10-01 09:22:35.859	59699	64460	62479	64296
2014-10-01 09:22:35.865	59684	64447	62470	64298
2014-10-01 09:22:35.869	59722	64435	62479	64271
2014-10-01 09:22:35.875	59742	64454	62504	64259
2014-10-01 09:22:35.880	59684	64444	62496	64241
2014-10-01 09:22:35.884	59706	64432	62504	64178
2014-10-01 09:22:35.890	59723	64437	62484	64131
2014-10-01 09:22:35.894	59713	64447	62437	64118
2014-10-01 09:22:35.900	59729	64449	62427	64088
2014-10-01 09:22:35.904	59665	64463	62409	64110
2014-10-01 09:22:35.910	59684	64463	62391	64142
2014-10-01 09:22:35.914	59736	64461	62377	64128
2014-10-01 09:22:35.920	59715	64474	62402	64155
2014-10-01 09:22:35.924	59716	64424	62464	64210
2014-10-01 09:22:35.930	59681	64440	62459	64258
2014-10-01 09:22:35.934	59715	64465	62434	64334
2014-10-01 09:22:35.940	59726	64426	62448	64391
2014-10-01 09:22:35.944	59676	64462	62463	64380
2014-10-01 09:22:35.950	59729	64448	62436	64338
2014-10-01 09:22:35.954	59661	64438	62411	64294
2014-10-01 09:22:35.960	59667	64475	62437	64267
2014-10-01 09:22:35.964	59766	64438	62456	64248
2014-10-01 09:22:35.970	59693	64446	62455	64184
2014-10-01 09:22:35.974	59690	64447	62459	64151
2014-10-01 09:22:35.980	59683	64446	62472	64149
2014-10-01 09:22:35.984	59710	64473	62481	64097
2014-10-01 09:22:35.990	59768	64436	62447	64078
2014-10-01 09:22:35.994	59659	64453	62415	64093
2014-10-01 09:22:36.000	59673	64452	62393	64091
2014-10-01 09:22:36.005	59724	64438	62351	64123
2014-10-01 09:22:36.009	59704	64459	62345	64180
2014-10-01 09:22:36.015	59736	64453	62387	64203
2014-10-01 09:22:36.019	59689	64469	62424	64218
2014-10-01 09:22:36.025	59704	64452	62423	64252
2014-10-01 09:22:36.029	59719	64460	62435	64297
2014-10-01 09:22:36.035	59664	64460	62458	64334
2014-10-01 09:22:36.039	59734	64434	62483	64326
2014-10-01 09:22:36.045	59720	64476	62489	64324
2014-10-01 09:22:36.049	59672	64458	62415	64312
2014-10-01 09:22:36.055	59717	64430	62389	64284
2014-10-01 09:22:36.059	59691	64462	62419	64251
2014-10-01 09:22:36.065	59703	64440	62406	64193
2014-10-01 09:22:36.069	59733	64458	62375	64151
2014-10-01 09:22:36.075	59669	64459	62345	64109
2014-10-01 09:22:36.079	59694	64423	62343	64117
2014-10-01 09:22:36.085	59750	64466	62368	64169
2014-10-01 09:22:36.089	59681	64448	62364	64186
2014-10-01 09:22:36.095	59674	64441	62332	64193
2014-10-01 09:22:36.099	59722	64470	62363	64177
2014-10-01 09:22:36.105	59692	64467	62394	64157
2014-10-01 09:22:36.109	59692	64492	62380	64168
2014-10-01 09:22:36.115	59722	64469	62400	64169
2014-10-01 09:22:36.119	59685	64444	62416	64161
2014-10-01 09:22:36.125	59689	64468	62426	64204
2014-10-01 09:22:36.130	59703	64477	62433	64250
2014-10-01 09:22:36.134	59664	64454	62415	64257
2014-10-01 09:22:36.140	59714	64461	62448	64281
2014-10-01 09:22:36.144	59705	64486	62483	64294
2014-10-01 09:22:36.150	59641	64457	62455	64250
2014-10-01 09:22:36.154	59699	64443	62441	64227
2014-10-01 09:22:36.160	59720	64459	62463	64247
2014-10-01 09:22:36.164	59703	64461	62476	64218
2014-10-01 09:22:36.170	59692	64449	62464	64184
2014-10-01 09:22:36.174	59690	64449	62431	64188
2014-10-01 09:22:36.180	59711	64461	62430	64188
2014-10-01 09:22:36.184	59700	64437	62463	64202
2014-10-01 09:22:36.190	59694	64448	62451	64197
2014-10-01 09:22:36.194	59700	64463	62431	64200
2014-10-01 09:22:36.200	59704	64440	62434	64210
2014-10-01 09:22:36.204	59693	64456	62439	64197
2014-10-01 09:22:36.210	59688	64444	62415	64221
2014-10-01 09:22:36.214	59703	64445	62358	64225
2014-10-01 09:22:36.220	59718	64443	62371	64194
2014-10-01 09:22:36.224	59690	64445	62422	64159
2014-10-01 09:22:36.230	59679	64461	62424	64129
2014-10-01 09:22:36.234	59723	64450	62407	64178
2014-10-01 09:22:36.240	59660	64476	62419	64226
2014-10-01 09:22:36.244	59680	64462	62452	64218
2014-10-01 09:22:36.250	59745	64458	62452	64230
2014-10-01 09:22:36.255	59690	64468	62403	64250
2014-10-01 09:22:36.259	59695	64431	62363	64247
2014-10-01 09:22:36.265	59695	64458	62402	64223
2014-10-01 09:22:36.269	59709	64477	62387	64173
2014-10-01 09:22:36.275	59705	64441	62330	64141
2014-10-01 09:22:36.279	59694	64467	62374	64178
2014-10-01 09:22:36.285	59684	64483	62405	64208
2014-10-01 09:22:36.289	59703	64450	62343	64206
2014-10-01 09:22:36.295	59746	64469	62288	64243
2014-10-01 09:22:36.299	59658	64461	62323	64258
2014-10-01 09:22:36.305	59689	64439	62359	64234
2014-10-01 09:22:36.309	59732	64463	62347	64225
2014-10-01 09:22:36.315	59686	64467	62372	64204
2014-10-01 09:22:36.319	59713	64443	62415	64194
2014-10-01 09:22:36.325	59681	64469	62445	64208
2014-10-01 09:22:36.329	59683	64485	62451	64212
2014-10-01 09:22:36.335	59729	64433	62414	64203
2014-10-01 09:22:36.339	59703	64444	62429	64183
2014-10-01 09:22:36.345	59698	64449	62472	64179
2014-10-01 09:22:36.349	59689	64449	62419	64177
2014-10-01 09:22:36.355	59688	64472	62375	64149
2014-10-01 09:22:36.359	59727	64447	62408	64126
2014-10-01 09:22:36.365	59696	64457	62458	64150
2014-10-01 09:22:36.369	59697	64458	62442	64205
2014-10-01 09:22:36.375	59721	64451	62373	64223
2014-10-01 09:22:36.380	59682	64455	62400	64239
2014-10-01 09:22:36.384	59706	64451	62450	64253
2014-10-01 09:22:36.390	59709	64468	62424	64228
2014-10-01 09:22:36.394	59698	64466	62419	64221
2014-10-01 09:22:36.400	59713	64457	62436	64194
2014-10-01 09:22:36.404	59655	64460	62443	64173
2014-10-01 09:22:36.410	59688	64444	62430	64183
2014-10-01 09:22:36.414	59714	64433	62388	64213
2014-10-01 09:22:36.420	59649	64474	62413	64301
2014-10-01 09:22:36.424	59701	64456	62463	64301
2014-10-01 09:22:36.430	59698	64452	62433	64267
2014-10-01 09:22:36.434	59697	64492	62384	64249
2014-10-01 09:22:36.440	59720	64443	62390	64182
2014-10-01 09:22:36.444	59670	64452	62441	64153
2014-10-01 09:22:36.450	59725	64463	62410	64126
2014-10-01 09:22:36.454	59703	64434	62350	64145
2014-10-01 09:22:36.460	59668	64457	62367	64210
2014-10-01 09:22:36.464	59716	64447	62395	64196
2014-10-01 09:22:36.470	59691	64445	62412	64168
2014-10-01 09:22:36.474	59668	64445	62360	64134
2014-10-01 09:22:36.480	59710	64456	62341	64124
2014-10-01 09:22:36.484	59714	64475	62413	64153
2014-10-01 09:22:36.490	59659	64434	62415	64182
2014-10-01 09:22:36.494	59709	64434	62420	64216
2014-10-01 09:22:36.500	59682	64446	62398	64231
2014-10-01 09:22:36.505	59674	64451	62371	64271
2014-10-01 09:22:36.509	59739	64450	62472	64321
2014-10-01 09:22:36.515	59656	64422	62484	64289
2014-10-01 09:22:36.519	59682	64454	62426	64249
2014-10-01 09:22:36.525	59705	64440	62427	64253
2014-10-01 09:22:36.529	59675	64431	62410	64248
2014-10-01 09:22:36.535	59715	64464	62455	64241
2014-10-01 09:22:36.539	59689	64437	62469	64207
2014-10-01 09:22:36.545	59697	64440	62391	64168
2014-10-01 09:22:36.549	59705	64457	62408	64166
2014-10-01 09:22:36.555	59678	64450	62422	64152
2014-10-01 09:22:36.559	59686	64447	62399	64110
2014-10-01 09:22:36.565	59710	64455	62427	64079
2014-10-01 09:22:36.569	59700	64460	62395	64073
2014-10-01 09:22:36.575	59679	64443	62351	64102
2014-10-01 09:22:36.579	59699	64460	62364	64176
2014-10-01 09:22:36.585	59684	64471	62370	64225
2014-10-01 09:22:36.589	59711	64439	62384	64250
2014-10-01 09:22:36.595	59689	64457	62402	64285
2014-10-01 09:22:36.599	59655	64445	62373	64312
2014-10-01 09:22:36.605	59738	64435	62366	64323
2014-10-01 09:22:36.609	59697	64476	62409	64281
2014-10-01 09:22:36.615	59690	64438	62412	64210
2014-10-01 09:22:36.619	59703	64442	62404	64182
2014-10-01 09:22:36.625	59669	64467	62372	64210
2014-10-01 09:22:36.630	59727	64450	62377	64213
2014-10-01 09:22:36.634	59691	64466	62435	64168
2014-10-01 09:22:36.640	59667	64445	62391	64161
2014-10-01 09:22:36.644	59698	64454	62393	64152
2014-10-01 09:22:36.650	59703	64478	62424	64133
2014-10-01 09:22:36.654	59693	64447	62418	64126
2014-10-01 09:22:36.660	59674	64436	62465	64111
2014-10-01 09:22:36.664	59696	64418	62412	64125
2014-10-01 09:22:36.670	59681	64429	62374	64148
2014-10-01 09:22:36.674	59697	64454	62386	64196
2014-10-01 09:22:36.680	59686	64427	62321	64227
2014-10-01 09:22:36.684	59685	64431	62329	64206
2014-10-01 09:22:36.690	59719	64453	62321	64220
2014-10-01 09:22:36.694	59659	64441	62289	64221
2014-10-01 09:22:36.700	59684	64441	62324	64231
2014-10-01 09:22:36.704	59693	64441	62311	64249
2014-10-01 09:22:36.710	59697	64427	62336	64259
2014-10-01 09:22:36.714	59717	64438	62383	64311
2014-10-01 09:22:36.720	59635	64436	62380	64275
2014-10-01 09:22:36.724	59697	64427	62424	64199
2014-10-01 09:22:36.730	59736	64434	62438	64188
2014-10-01 09:22:36.734	59685	64439	62447	64160
2014-10-01 09:22:36.740	59687	64449	62455	64130
2014-10-01 09:22:36.744	59684	64431	62418	64154
2014-10-01 09:22:36.750	59709	64415	62437	64152
2014-10-01 09:22:36.755	59696	64444	62432	64114
2014-10-01 09:22:36.759	59685	64434	62390	64132
2014-10-01 09:22:36.765	59663	64418	62417	64122
2014-10-01 09:22:36.769	59687	64445	62467	64104
2014-10-01 09:22:36.775	59708	64434	62424	64156
2014-10-01 09:22:36.779	59656	64444	62367	64206
2014-10-01 09:22:36.785	59688	64437	62392	64237
2014-10-01 09:22:36.789	59673	64412	62402	64260
2014-10-01 09:22:36.795	59681	64443	62409	64287
2014-10-01 09:22:36.799	59699	64439	62375	64309
2014-10-01 09:22:36.805	59665	64442	62362	64323
2014-10-01 09:22:36.809	59696	64442	62406	64313
2014-10-01 09:22:36.815	59695	64429	62391	64245
2014-10-01 09:22:36.819	59691	64429	62408	64194
2014-10-01 09:22:36.825	59668	64418	62441	64183
2014-10-01 09:22:36.829	59697	64435	62448	64150
2014-10-01 09:22:36.835	59724	64435	62438	64095
2014-10-01 09:22:36.839	59651	64428	62424	64077
2014-10-01 09:22:36.845	59668	64439	62414	64085
2014-10-01 09:22:36.849	59690	64431	62406	64111
2014-10-01 09:22:36.855	59697	64428	62402	64152
2014-10-01 09:22:36.859	59684	64438	62366	64157
2014-10-01 09:22:36.865	59643	64427	62406	64134
2014-10-01 09:22:36.869	59717	64420	62403	64125
2014-10-01 09:22:36.875	59709	64455	62347	64164
2014-10-01 09:22:36.880	59651	64430	62380	64200
2014-10-01 09:22:36.884	59683	64379	62382	64230
2014-10-01 09:22:36.890	59676	64437	62407	64271
2014-10-01 09:22:36.894	59700	64452	62423	64283
2014-10-01 09:22:36.900	59677	64394	62365	64266
2014-10-01 09:22:36.904	59635	64416	62371	64202
2014-10-01 09:22:36.910	59717	64435	62378	64190
2014-10-01 09:22:36.914	59677	64421	62344	64219
2014-10-01 09:22:36.920	59655	64412	62353	64233
2014-10-01 09:22:36.924	59699	64421	62344	64267
2014-10-01 09:22:36.930	59629	64432	62330	64229
2014-10-01 09:22:36.934	59671	64416	62335	64147
2014-10-01 09:22:36.940	59698	64424	62336	64101
2014-10-01 09:22:36.944	59651	64412	62343	64110
2014-10-01 09:22:36.950	59678	64425	62325	64107
2014-10-01 09:22:36.954	59675	64444	62325	64083
2014-10-01 09:22:36.960	59657	64421	62351	64135
2014-10-01 09:22:36.964	59682	64423	62368	64137
2014-10-01 09:22:36.970	59665	64415	62413	64114
2014-10-01 09:22:36.974	59651	64408	62421	64161
2014-10-01 09:22:36.980	59689	64421	62386	64181
2014-10-01 09:22:36.984	59659	64426	62433	64216
2014-10-01 09:22:36.990	59685	64401	62479	64231
2014-10-01 09:22:36.994	59680	64434	62427	64216
2014-10-01 09:22:37.000	59634	64439	62401	64223
2014-10-01 09:22:37.005	59710	64389	62414	64201
2014-10-01 09:22:37.009	59664	64422	62447	64199
2014-10-01 09:22:37.015	59667	64421	62460	64202
2014-10-01 09:22:37.019	59696	64390	62376	64184
2014-10-01 09:22:37.025	59625	64406	62371	64171
2014-10-01 09:22:37.029	59683	64421	62430	64155
2014-10-01 09:22:37.035	59660	64404	62427	64170
2014-10-01 09:22:37.039	59644	64416	62412	64167
2014-10-01 09:22:37.045	59701	64422	62374	64166
2014-10-01 09:22:37.049	59665	64391	62388	64194
2014-10-01 09:22:37.055	59663	64417	62415	64189
2014-10-01 09:22:37.059	59679	64410	62377	64204
2014-10-01 09:22:37.065	59676	64395	62370	64215
2014-10-01 09:22:37.069	59651	64411	62393	64191
2014-10-01 09:22:37.075	59643	64418	62393	64169
2014-10-01 09:22:37.079	59695	64409	62404	64152
2014-10-01 09:22:37.085	59667	64392	62410	64131
2014-10-01 09:22:37.089	59617	64401	62392	64095
2014-10-01 09:22:37.095	59697	64409	62415	64109
2014-10-01 09:22:37.099	59672	64420	62417	64129
2014-10-01 09:22:37.105	59615	64381	62379	64117
2014-10-01 09:22:37.109	59687	64393	62385	64149
2014-10-01 09:22:37.115	59644	64431	62385	64163
2014-10-01 09:22:37.119	59651	64390	62359	64162
2014-10-01 09:22:37.125	59675	64405	62356	64201
2014-10-01 09:22:37.130	59625	64409	62383	64216
2014-10-01 09:22:37.134	59668	64379	62398	64229
2014-10-01 09:22:37.140	59659	64399	62369	64272
2014-10-01 09:22:37.144	59656	64414	62356	64257
2014-10-01 09:22:37.150	59673	64393	62360	64206
2014-10-01 09:22:37.154	59647	64394	62346	64171
2014-10-01 09:22:37.160	59661	64417	62343	64138
2014-10-01 09:22:37.164	59661	64391	62347	64132
2014-10-01 09:22:37.170	59643	64406	62332	64132
2014-10-01 09:22:37.174	59665	64420	62332	64113
2014-10-01 09:22:37.180	59666	64401	62352	64070
2014-10-01 09:22:37.184	59649	64434	62356	64042
2014-10-01 09:22:37.190	59685	64406	62381	64068
2014-10-01 09:22:37.194	59656	64396	62384	64126
2014-10-01 09:22:37.200	59655	64426	62346	64194
2014-10-01 09:22:37.204	59699	64389	62366	64241
2014-10-01 09:22:37.210	59635	64393	62394	64256
2014-10-01 09:22:37.214	59647	64400	62393	64219
2014-10-01 09:22:37.220	59689	64391	62389	64171
2014-10-01 09:22:37.224	59644	64400	62375	64175
2014-10-01 09:22:37.230	59661	64389	62401	64175
2014-10-01 09:22:37.234	59658	64391	62421	64178
2014-10-01 09:22:37.240	59629	64400	62361	64221
2014-10-01 09:22:37.244	59675	64400	62326	64222
2014-10-01 09:22:37.250	59646	64371	62367	64192
2014-10-01 09:22:37.255	59621	64374	62406	64167
2014-10-01 09:22:37.259	59653	64415	62361	64133
2014-10-01 09:22:37.265	59653	64392	62291	64128
2014-10-01 09:22:37.269	59663	64408	62339	64125
2014-10-01 09:22:37.275	59635	64418	62400	64121
2014-10-01 09:22:37.279	59645	64390	62392	64132
2014-10-01 09:22:37.285	59666	64409	62380	64103
2014-10-01 09:22:37.289	59642	64392	62407	64091
2014-10-01 09:22:37.295	59654	64386	62458	64112
2014-10-01 09:22:37.299	59654	64390	62427	64117
2014-10-01 09:22:37.305	59649	64405	62402	64154
2014-10-01 09:22:37.309	59654	64420	62398	64184
2014-10-01 09:22:37.315	59655	64374	62349	64192
2014-10-01 09:22:37.319	59662	64397	62341	64196
2014-10-01 09:22:37.325	59671	64421	62326	64171
2014-10-01 09:22:37.329	59642	64377	62319	64191
2014-10-01 09:22:37.335	59599	64382	62341	64202
2014-10-01 09:22:37.339	59661	64390	62329	64171
2014-10-01 09:22:37.345	59689	64401	62366	64163
2014-10-01 09:22:37.349	59623	64406	62380	64144
2014-10-01 09:22:37.355	59625	64383	62334	64115
2014-10-01 09:22:37.359	59658	64408	62358	64105
2014-10-01 09:22:37.365	59656	64397	62356	64130
2014-10-01 09:22:37.369	59642	64365	62323	64162
2014-10-01 09:22:37.375	59648	64404	62352	64152
2014-10-01 09:22:37.380	59654	64389	62339	64126
2014-10-01 09:22:37.384	59653	64354	62346	64115
2014-10-01 09:22:37.390	59654	64410	62385	64103
2014-10-01 09:22:37.394	59629	64408	62368	64122
2014-10-01 09:22:37.400	59643	64385	62373	64153
2014-10-01 09:22:37.404	59652	64418	62384	64165
2014-10-01 09:22:37.410	59636	64408	62413	64193
2014-10-01 09:22:37.414	59667	64376	62436	64197
2014-10-01 09:22:37.420	59646	64395	62405	64202
2014-10-01 09:22:37.424	59632	64393	62392	64215
2014-10-01 09:22:37.430	59655	64371	62370	64208
2014-10-01 09:22:37.434	59639	64393	62361	64208
2014-10-01 09:22:37.440	59658	64383	62370	64175
2014-10-01 09:22:37.444	59649	64383	62343	64133
2014-10-01 09:22:37.450	59629	64397	62329	64114
2014-10-01 09:22:37.454	59655	64366	62371	64090
2014-10-01 09:22:37.460	59648	64374	62414	64059
2014-10-01 09:22:37.464	59631	64386	62361	64058
2014-10-01 09:22:37.470	59652	64408	62346	64076
2014-10-01 09:22:37.474	59661	64407	62401	64065
2014-10-01 09:22:37.480	59631	64344	62416	64078
2014-10-01 09:22:37.484	59644	64408	62409	64128
2014-10-01 09:22:37.490	59655	64435	62337	64177
2014-10-01 09:22:37.494	59647	64337	62310	64232
2014-10-01 09:22:37.500	59660	64383	62343	64274
2014-10-01 09:22:37.505	59627	64419	62353	64277
2014-10-01 09:22:37.509	59620	64373	62399	64260
2014-10-01 09:22:37.515	59676	64395	62396	64213
2014-10-01 09:22:37.519	59642	64385	62358	64164
2014-10-01 09:22:37.525	59606	64370	62358	64132
2014-10-01 09:22:37.529	59655	64393	62361	64082
2014-10-01 09:22:37.535	59639	64397	62351	64109
2014-10-01 09:22:37.539	59643	64371	62337	64153
2014-10-01 09:22:37.545	59651	64350	62357	64134
2014-10-01 09:22:37.549	59633	64401	62350	64137
2014-10-01 09:22:37.555	59652	64394	62338	64102
2014-10-01 09:22:37.559	59638	64361	62330	64058
2014-10-01 09:22:37.565	59646	64374	62337	64060
2014-10-01 09:22:37.569	59651	64371	62417	64031
2014-10-01 09:22:37.575	59648	64404	62409	64041
2014-10-01 09:22:37.579	59650	64363	62377	64081
2014-10-01 09:22:37.585	59645	64361	62367	64099
2014-10-01 09:22:37.589	59635	64414	62311	64144
2014-10-01 09:22:37.595	59642	64367	62337	64189
2014-10-01 09:22:37.599	59654	64399	62379	64240
2014-10-01 09:22:37.605	59633	64403	62370	64278
2014-10-01 09:22:37.609	59636	64379	62377	64281
2014-10-01 09:22:37.615	59622	64377	62365	64285
2014-10-01 09:22:37.619	59656	64363	62351	64260
2014-10-01 09:22:37.625	59666	64404	62363	64211
2014-10-01 09:22:37.630	59619	64367	62356	64189
2014-10-01 09:22:37.634	59654	64387	62354	64177
2014-10-01 09:22:37.640	59637	64427	62366	64121
2014-10-01 09:22:37.644	59644	64370	62344	64072
2014-10-01 09:22:37.650	59671	64376	62357	64039
2014-10-01 09:22:37.654	59609	64378	62415	64008
2014-10-01 09:22:37.660	59635	64377	62415	64037
2014-10-01 09:22:37.664	59647	64382	62413	64048
2014-10-01 09:22:37.670	59628	64359	62420	64046
2014-10-01 09:22:37.674	59651	64372	62400	64055
2014-10-01 09:22:37.680	59618	64366	62422	64058
2014-10-01 09:22:37.684	59619	64389	62412	64107
2014-10-01 09:22:37.690	59643	64422	62382	64142
2014-10-01 09:22:37.694	59641	64344	62416	64166
2014-10-01 09:22:37.700	59636	64379	62381	64191
2014-10-01 09:22:37.704	59643	64401	62356	64204
2014-10-01 09:22:37.710	59628	64346	62384	64239
2014-10-01 09:22:37.714	59646	64423	62335	64272
2014-10-01 09:22:37.720	59658	64380	62352	64309
2014-10-01 09:22:37.724	59612	64359	62386	64285
2014-10-01 09:22:37.730	59647	64418	62363	64220
2014-10-01 09:22:37.734	59627	64354	62398	64187
2014-10-01 09:22:37.740	59664	64390	62362	64125
2014-10-01 09:22:37.744	59668	64418	62335	64077
2014-10-01 09:22:37.750	59601	64365	62393	64024
2014-10-01 09:22:37.755	59694	64383	62362	63977
2014-10-01 09:22:37.759	59652	64397	62333	64006
2014-10-01 09:22:37.765	59638	64405	62342	64033
2014-10-01 09:22:37.769	59648	64380	62322	64072
2014-10-01 09:22:37.775	59611	64372	62375	64124
2014-10-01 09:22:37.779	59680	64436	62428	64154
2014-10-01 09:22:37.785	59641	64364	62399	64185
2014-10-01 09:22:37.789	59649	64336	62402	64196
2014-10-01 09:22:37.795	59648	64423	62380	64224
2014-10-01 09:22:37.799	59627	64370	62320	64252
2014-10-01 09:22:37.805	59665	64378	62336	64228
2014-10-01 09:22:37.809	59626	64401	62353	64201
2014-10-01 09:22:37.815	59655	64367	62365	64196
2014-10-01 09:22:37.819	59668	64386	62382	64182
2014-10-01 09:22:37.825	59632	64352	62376	64170
2014-10-01 09:22:37.829	59642	64391	62421	64169
2014-10-01 09:22:37.835	59659	64411	62419	64156
2014-10-01 09:22:37.839	59662	64343	62366	64112
2014-10-01 09:22:37.845	59657	64397	62381	64059
2014-10-01 09:22:37.849	59648	64402	62411	64053
2014-10-01 09:22:37.855	59647	64351	62421	64056
2014-10-01 09:22:37.859	59668	64373	62429	64058
2014-10-01 09:22:37.865	59637	64385	62420	64135
2014-10-01 09:22:37.869	59645	64401	62416	64174
2014-10-01 09:22:37.875	59679	64382	62433	64184
2014-10-01 09:22:37.880	59647	64359	62426	64246
2014-10-01 09:22:37.884	59671	64396	62403	64229
2014-10-01 09:22:37.890	59675	64407	62370	64182
2014-10-01 09:22:37.894	59649	64390	62356	64166
2014-10-01 09:22:37.900	59669	64398	62371	64122
2014-10-01 09:22:37.904	59661	64379	62363	64119
2014-10-01 09:22:37.910	59655	64355	62366	64181
2014-10-01 09:22:37.914	59659	64399	62355	64196
2014-10-01 09:22:37.920	59671	64400	62346	64141
2014-10-01 09:22:37.924	59670	64360	62371	64127
2014-10-01 09:22:37.930	59655	64374	62348	64120
2014-10-01 09:22:37.934	59659	64373	62329	64106
2014-10-01 09:22:37.940	59654	64383	62362	64164
2014-10-01 09:22:37.944	59674	64381	62384	64196
2014-10-01 09:22:37.950	59672	64368	62390	64187
2014-10-01 09:22:37.954	59664	64393	62399	64171
2014-10-01 09:22:37.960	59667	64400	62417	64135
2014-10-01 09:22:37.964	59653	64402	62417	64120
2014-10-01 09:22:37.970	59670	64372	62389	64143
2014-10-01 09:22:37.974	59673	64382	62398	64188
2014-10-01 09:22:37.980	59686	64419	62409	64175
2014-10-01 09:22:37.984	59663	64380	62378	64155
2014-10-01 09:22:37.990	59624	64403	62369	64174
2014-10-01 09:22:37.994	59659	64391	62383	64144
2014-10-01 09:22:38.000	59670	64351	62379	64146
2014-10-01 09:22:38.005	59654	64401	62366	64160
2014-10-01 09:22:38.009	59643	64391	62387	64136
2014-10-01 09:22:38.015	59651	64387	62412	64181
2014-10-01 09:22:38.019	59663	64401	62381	64223
2014-10-01 09:22:38.025	59660	64384	62371	64215
2014-10-01 09:22:38.029	59649	64401	62376	64195
2014-10-01 09:22:38.035	59651	64359	62369	64168
2014-10-01 09:22:38.039	59686	64360	62416	64143
2014-10-01 09:22:38.045	59668	64416	62433	64105
2014-10-01 09:22:38.049	59651	64351	62410	64090
2014-10-01 09:22:38.055	59673	64381	62384	64096
2014-10-01 09:22:38.059	59672	64392	62357	64128
2014-10-01 09:22:38.065	59681	64345	62394	64161
2014-10-01 09:22:38.069	59675	64429	62412	64149
2014-10-01 09:22:38.075	59662	64354	62406	64155
2014-10-01 09:22:38.079	59674	64346	62411	64149
2014-10-01 09:22:38.085	59695	64411	62387	64133
2014-10-01 09:22:38.089	59682	64369	62382	64178
2014-10-01 09:22:38.095	59669	64421	62387	64249
2014-10-01 09:22:38.099	59684	64368	62389	64295
2014-10-01 09:22:38.105	59687	64395	62416	64302
2014-10-01 09:22:38.109	59664	64433	62450	64294
2014-10-01 09:22:38.115	59648	64358	62446	64256
2014-10-01 09:22:38.119	59679	64402	62436	64187
2014-10-01 09:22:38.125	59679	64376	62445	64135
2014-10-01 09:22:38.130	59674	64390	62421	64081
2014-10-01 09:22:38.134	59691	64422	62409	64025
2014-10-01 09:22:38.140	59661	64375	62399	64009
2014-10-01 09:22:38.144	59676	64375	62393	64026
2014-10-01 09:22:38.150	59685	64391	62399	64060
2014-10-01 09:22:38.154	59669	64401	62348	64107
2014-10-01 09:22:38.160	59703	64399	62338	64134
2014-10-01 09:22:38.164	59666	64401	62373	64147
2014-10-01 09:22:38.170	59639	64378	62378	64177
2014-10-01 09:22:38.174	59682	64412	62416	64228
2014-10-01 09:22:38.180	59693	64403	62454	64257
2014-10-01 09:22:38.184	59685	64368	62445	64269
2014-10-01 09:22:38.190	59648	64424	62432	64282
2014-10-01 09:22:38.194	59675	64396	62427	64270
2014-10-01 09:22:38.200	59696	64375	62416	64248
2014-10-01 09:22:38.204	59662	64414	62412	64224
2014-10-01 09:22:38.210	59693	64396	62410	64173
2014-10-01 09:22:38.214	59683	64381	62406	64142
2014-10-01 09:22:38.220	59671	64391	62417	64129
2014-10-01 09:22:38.224	59690	64401	62432	64092
2014-10-01 09:22:38.230	59673	64398	62410	64101
2014-10-01 09:22:38.234	59680	64378	62381	64102
2014-10-01 09:22:38.240	59689	64409	62399	64073
2014-10-01 09:22:38.244	59660	64417	62418	64113
2014-10-01 09:22:38.250	59675	64398	62425	64147
2014-10-01 09:22:38.255	59707	64409	62426	64166
2014-10-01 09:22:38.259	59659	64386	62416	64212
2014-10-01 09:22:38.265	59659	64410	62383	64254
2014-10-01 09:22:38.269	59711	64409	62343	64260
2014-10-01 09:22:38.275	59699	64386	62355	64249
2014-10-01 09:22:38.279	59669	64407	62372	64265
2014-10-01 09:22:38.285	59660	64393	62382	64237
2014-10-01 09:22:38.289	59690	64395	62385	64204
2014-10-01 09:22:38.295	59702	64389	62383	64225
2014-10-01 09:22:38.299	59666	64404	62412	64192
2014-10-01 09:22:38.305	59653	64425	62413	64139
2014-10-01 09:22:38.309	59694	64409	62402	64132
2014-10-01 09:22:38.315	59720	64401	62418	64119
2014-10-01 09:22:38.319	59680	64390	62394	64110
2014-10-01 09:22:38.325	59655	64408	62377	64126
2014-10-01 09:22:38.329	59688	64423	62411	64124
2014-10-01 09:22:38.335	59699	64396	62457	64133
2014-10-01 09:22:38.339	59686	64394	62493	64186
2014-10-01 09:22:38.345	59681	64410	62474	64218
2014-10-01 09:22:38.349	59675	64392	62434	64206
2014-10-01 09:22:38.355	59693	64399	62441	64205
2014-10-01 09:22:38.359	59689	64390	62465	64261
2014-10-01 09:22:38.365	59683	64391	62460	64279
2014-10-01 09:22:38.369	59690	64453	62446	64225
2014-10-01 09:22:38.375	59682	64417	62447	64237
2014-10-01 09:22:38.380	59693	64375	62398	64243
2014-10-01 09:22:38.384	59696	64434	62352	64194
2014-10-01 09:22:38.390	59689	64443	62374	64191
2014-10-01 09:22:38.394	59676	64389	62369	64156
2014-10-01 09:22:38.400	59689	64392	62389	64078
2014-10-01 09:22:38.404	59695	64447	62432	64060
2014-10-01 09:22:38.410	59678	64425	62420	64083
2014-10-01 09:22:38.414	59697	64394	62419	64090
2014-10-01 09:22:38.420	59698	64436	62399	64100
2014-10-01 09:22:38.424	59684	64434	62376	64144
2014-10-01 09:22:38.430	59688	64408	62419	64185
2014-10-01 09:22:38.434	59691	64419	62408	64223
2014-10-01 09:22:38.440	59668	64405	62405	64275
2014-10-01 09:22:38.444	59690	64397	62455	64299
2014-10-01 09:22:38.450	59695	64415	62439	64292
2014-10-01 09:22:38.454	59637	64420	62439	64290
2014-10-01 09:22:38.460	59699	64419	62450	64279
2014-10-01 09:22:38.464	59730	64407	62440	64261
2014-10-01 09:22:38.470	59676	64415	62439	64249
2014-10-01 09:22:38.474	59684	64437	62435	64229
2014-10-01 09:22:38.480	59691	64437	62466	64181
2014-10-01 09:22:38.484	59701	64422	62477	64132
2014-10-01 09:22:38.490	59705	64423	62458	64125
2014-10-01 09:22:38.494	59690	64442	62421	64106
2014-10-01 09:22:38.500	59688	64428	62393	64071
2014-10-01 09:22:38.505	59703	64435	62407	64068
2014-10-01 09:22:38.509	59696	64426	62402	64067
2014-10-01 09:22:38.515	59692	64416	62405	64098
2014-10-01 09:22:38.519	59703	64409	62432	64156
2014-10-01 09:22:38.525	59677	64386	62445	64181
2014-10-01 09:22:38.529	59660	64436	62423	64214
2014-10-01 09:22:38.535	59702	64431	62394	64239
2014-10-01 09:22:38.539	59719	64399	62408	64274
2014-10-01 09:22:38.545	59665	64409	62405	64288
2014-10-01 09:22:38.549	59673	64418	62411	64243
2014-10-01 09:22:38.555	59715	64423	62421	64274
2014-10-01 09:22:38.559	59713	64406	62401	64301
2014-10-01 09:22:38.565	59713	64436	62412	64258
2014-10-01 09:22:38.569	59693	64433	62427	64231
2014-10-01 09:22:38.575	59697	64418	62460	64194
2014-10-01 09:22:38.579	59701	64419	62498	64191
2014-10-01 09:22:38.585	59681	64423	62472	64204
2014-10-01 09:22:38.589	59678	64454	62464	64187
2014-10-01 09:22:38.595	59690	64410	62456	64145
2014-10-01 09:22:38.599	59707	64417	62425	64063
2014-10-01 09:22:38.605	59694	64439	62417	64025
2014-10-01 09:22:38.609	59704	64408	62406	64062
2014-10-01 09:22:38.615	59712	64431	62394	64097
2014-10-01 09:22:38.619	59687	64421	62398	64133
2014-10-01 09:22:38.625	59702	64426	62408	64202
2014-10-01 09:22:38.630	59715	64416	62407	64239
2014-10-01 09:22:38.634	59718	64407	62398	64227
2014-10-01 09:22:38.640	59701	64442	62417	64197
2014-10-01 09:22:38.644	59687	64406	62455	64179
2014-10-01 09:22:38.650	59729	64428	62467	64237
2014-10-01 09:22:38.654	59711	64464	62461	64345
2014-10-01 09:22:38.660	59680	64432	62447	64380
2014-10-01 09:22:38.664	59699	64428	62438	64325
2014-10-01 09:22:38.670	59697	64439	62468	64254
2014-10-01 09:22:38.674	59710	64433	62512	64192
2014-10-01 09:22:38.680	59694	64408	62525	64195
2014-10-01 09:22:38.684	59682	64436	62485	64246
2014-10-01 09:22:38.690	59712	64442	62455	64234
2014-10-01 09:22:38.694	59685	64410	62455	64162
2014-10-01 09:22:38.700	59690	64445	62441	64091
2014-10-01 09:22:38.704	59706	64441	62411	64044
2014-10-01 09:22:38.710	59688	64408	62371	64035
2014-10-01 09:22:38.714	59727	64433	62373	64094
2014-10-01 09:22:38.720	59701	64447	62405	64144
2014-10-01 09:22:38.724	59702	64424	62416	64138
2014-10-01 09:22:38.730	59721	64407	62418	64171
2014-10-01 09:22:38.734	59671	64437	62420	64223
2014-10-01 09:22:38.740	59715	64464	62438	64241
2014-10-01 09:22:38.744	59706	64421	62428	64273
2014-10-01 09:22:38.750	59709	64417	62413	64304
2014-10-01 09:22:38.755	59738	64463	62440	64274
2014-10-01 09:22:38.759	59683	64449	62450	64217
2014-10-01 09:22:38.765	59729	64430	62476	64228
2014-10-01 09:22:38.769	59720	64447	62476	64252
2014-10-01 09:22:38.775	59677	64451	62431	64217
2014-10-01 09:22:38.779	59711	64441	62434	64228
2014-10-01 09:22:38.785	59695	64435	62420	64244
2014-10-01 09:22:38.789	59706	64459	62403	64204
2014-10-01 09:22:38.795	59734	64446	62413	64182
2014-10-01 09:22:38.799	59699	64434	62399	64159
2014-10-01 09:22:38.805	59692	64466	62415	64151
2014-10-01 09:22:38.809	59716	64423	62426	64162
2014-10-01 09:22:38.815	59708	64419	62407	64163
2014-10-01 09:22:38.819	59722	64456	62422	64150
2014-10-01 09:22:38.825	59696	64454	62439	64107
2014-10-01 09:22:38.829	59690	64434	62480	64118
2014-10-01 09:22:38.835	59729	64428	62519	64154
2014-10-01 09:22:38.839	59697	64470	62515	64150
2014-10-01 09:22:38.845	59714	64453	62511	64196
2014-10-01 09:22:38.849	59708	64452	62459	64247
2014-10-01 09:22:38.855	59708	64442	62443	64247
2014-10-01 09:22:38.859	59737	64445	62459	64277
2014-10-01 09:22:38.865	59683	64472	62416	64309
2014-10-01 09:22:38.869	59713	64436	62426	64266
2014-10-01 09:22:38.875	59720	64453	62408	64250
2014-10-01 09:22:38.880	59691	64444	62384	64288
2014-10-01 09:22:38.884	59721	64436	62428	64271
2014-10-01 09:22:38.890	59698	64450	62423	64263
2014-10-01 09:22:38.894	59711	64458	62426	64221
2014-10-01 09:22:38.900	59738	64465	62444	64103
2014-10-01 09:22:38.904	59715	64440	62465	64085
2014-10-01 09:22:38.910	59696	64466	62493	64146
2014-10-01 09:22:38.914	59694	64444	62482	64194
2014-10-01 09:22:38.920	59722	64455	62475	64214
2014-10-01 09:22:38.924	59712	64465	62444	64180
2014-10-01 09:22:38.930	59702	64428	62447	64145
2014-10-01 09:22:38.934	59724	64471	62453	64160
2014-10-01 09:22:38.940	59717	64450	62398	64195
2014-10-01 09:22:38.944	59714	64439	62412	64228
2014-10-01 09:22:38.950	59712	64464	62423	64258
2014-10-01 09:22:38.954	59710	64459	62422	64254
2014-10-01 09:22:38.960	59725	64454	62451	64233
2014-10-01 09:22:38.964	59710	64456	62437	64228
2014-10-01 09:22:38.970	59709	64475	62452	64252
2014-10-01 09:22:38.974	59717	64461	62480	64226
2014-10-01 09:22:38.980	59698	64472	62494	64160
2014-10-01 09:22:38.984	59707	64463	62514	64210
2014-10-01 09:22:38.990	59719	64451	62484	64248
2014-10-01 09:22:38.994	59712	64469	62459	64242
2014-10-01 09:22:39.000	59729	64459	62465	64294
2014-10-01 09:22:39.005	59717	64449	62474	64279
2014-10-01 09:22:39.009	59699	64453	62475	64167
2014-10-01 09:22:39.015	59741	64469	62459	64113
2014-10-01 09:22:39.019	59735	64439	62445	64164
2014-10-01 09:22:39.025	59680	64437	62440	64186
2014-10-01 09:22:39.029	59699	64467	62451	64187
2014-10-01 09:22:39.035	59728	64464	62452	64252
2014-10-01 09:22:39.039	59723	64458	62447	64282
2014-10-01 09:22:39.045	59723	64457	62435	64236
2014-10-01 09:22:39.049	59708	64466	62412	64225
2014-10-01 09:22:39.055	59721	64448	62423	64250
2014-10-01 09:22:39.059	59720	64450	62451	64217
2014-10-01 09:22:39.065	59719	64474	62477	64211
2014-10-01 09:22:39.069	59732	64482	62502	64217
2014-10-01 09:22:39.075	59721	64457	62487	64176
2014-10-01 09:22:39.079	59723	64428	62448	64198
2014-10-01 09:22:39.085	59696	64462	62414	64216
2014-10-01 09:22:39.089	59732	64480	62388	64182
2014-10-01 09:22:39.095	59734	64477	62434	64186
2014-10-01 09:22:39.099	59709	64461	62488	64230
2014-10-01 09:22:39.105	59741	64454	62503	64247
2014-10-01 09:22:39.109	59707	64481	62532	64226
2014-10-01 09:22:39.115	59745	64476	62495	64223
2014-10-01 09:22:39.119	59738	64459	62483	64217
2014-10-01 09:22:39.125	59699	64468	62503	64203
2014-10-01 09:22:39.130	59741	64498	62457	64216
2014-10-01 09:22:39.134	59739	64471	62471	64258
2014-10-01 09:22:39.140	59729	64450	62464	64285
2014-10-01 09:22:39.144	59721	64488	62444	64269
2014-10-01 09:22:39.150	59728	64461	62489	64248
2014-10-01 09:22:39.154	59726	64437	62455	64198
2014-10-01 09:22:39.160	59740	64481	62422	64183
2014-10-01 09:22:39.164	59734	64484	62440	64215
2014-10-01 09:22:39.170	59716	64452	62453	64192
2014-10-01 09:22:39.174	59739	64457	62483	64206
2014-10-01 09:22:39.180	59732	64507	62491	64255
2014-10-01 09:22:39.184	59731	64502	62481	64250
2014-10-01 09:22:39.190	59725	64452	62464	64230
2014-10-01 09:22:39.194	59747	64458	62422	64214
2014-10-01 09:22:39.200	59735	64479	62417	64193
2014-10-01 09:22:39.204	59709	64485	62435	64210
2014-10-01 09:22:39.210	59753	64479	62443	64268
2014-10-01 09:22:39.214	59737	64456	62449	64280
2014-10-01 09:22:39.220	59740	64462	62449	64290
2014-10-01 09:22:39.224	59751	64476	62457	64282
2014-10-01 09:22:39.230	59715	64480	62442	64192
2014-10-01 09:22:39.234	59724	64491	62440	64144
2014-10-01 09:22:39.240	59738	64473	62476	64139
2014-10-01 09:22:39.244	59741	64475	62488	64172
2014-10-01 09:22:39.250	59738	64510	62494	64201
2014-10-01 09:22:39.255	59741	64481	62483	64211
2014-10-01 09:22:39.259	59730	64473	62479	64267
2014-10-01 09:22:39.265	59727	64475	62514	64244
2014-10-01 09:22:39.269	59758	64480	62509	64228
2014-10-01 09:22:39.275	59734	64507	62497	64255
2014-10-01 09:22:39.279	59742	64499	62494	64236
2014-10-01 09:22:39.285	59750	64487	62483	64313
2014-10-01 09:22:39.289	59728	64471	62509	64378
2014-10-01 09:22:39.295	59742	64497	62513	64303
2014-10-01 09:22:39.299	59714	64513	62494	64270
2014-10-01 09:22:39.305	59755	64489	62477	64270
2014-10-01 09:22:39.309	59758	64487	62444	64196
2014-10-01 09:22:39.315	59702	64468	62448	64161
2014-10-01 09:22:39.319	59761	64496	62448	64188
2014-10-01 09:22:39.325	59756	64517	62476	64190
2014-10-01 09:22:39.329	59746	64473	62503	64195
2014-10-01 09:22:39.335	59766	64475	62498	64211
2014-10-01 09:22:39.339	59736	64491	62530	64232
2014-10-01 09:22:39.345	59771	64488	62524	64237
2014-10-01 09:22:39.349	59760	64480	62499	64217
2014-10-01 09:22:39.355	59714	64487	62483	64184
2014-10-01 09:22:39.359	59740	64497	62466	64168
2014-10-01 09:22:39.365	59757	64480	62495	64228
2014-10-01 09:22:39.369	59747	64486	62478	64291
2014-10-01 09:22:39.375	59735	64498	62450	64308
2014-10-01 09:22:39.380	59764	64480	62462	64311
2014-10-01 09:22:39.384	59766	64479	62478	64316
2014-10-01 09:22:39.390	59734	64490	62485	64297
2014-10-01 09:22:39.394	59714	64476	62450	64268
2014-10-01 09:22:39.400	59735	64485	62462	64290
2014-10-01 09:22:39.404	59793	64501	62477	64289
2014-10-01 09:22:39.410	59738	64494	62482	64304
2014-10-01 09:22:39.414	59711	64483	62520	64319
2014-10-01 09:22:39.420	59763	64499	62505	64260
2014-10-01 09:22:39.424	59757	64526	62515	64223
2014-10-01 09:22:39.430	59739	64482	62525	64193
2014-10-01 09:22:39.434	59737	64469	62510	64171
2014-10-01 09:22:39.440	59752	64500	62535	64172
2014-10-01 09:22:39.444	59764	64484	62532	64180
2014-10-01 09:22:39.450	59763	64478	62527	64202
2014-10-01 09:22:39.454	59724	64490	62517	64220
2014-10-01 09:22:39.460	59755	64492	62493	64239
2014-10-01 09:22:39.464	59787	64498	62500	64230
2014-10-01 09:22:39.470	59742	64509	62513	64243
2014-10-01 09:22:39.474	59751	64500	62508	64245
2014-10-01 09:22:39.480	59754	64493	62491	64242
2014-10-01 09:22:39.484	59775	64488	62492	64310
2014-10-01 09:22:39.490	59766	64477	62513	64315
2014-10-01 09:22:39.494	59746	64487	62514	64316
2014-10-01 09:22:39.500	59758	64488	62482	64348
2014-10-01 09:22:39.505	59761	64470	62483	64323
2014-10-01 09:22:39.509	59782	64501	62505	64338
2014-10-01 09:22:39.515	59755	64517	62485	64328
2014-10-01 09:22:39.519	59752	64474	62481	64266
2014-10-01 09:22:39.525	59789	64473	62496	64245
2014-10-01 09:22:39.529	59778	64493	62467	64234
2014-10-01 09:22:39.535	59764	64498	62455	64234
2014-10-01 09:22:39.539	59763	64492	62478	64222
2014-10-01 09:22:39.545	59743	64494	62482	64206
2014-10-01 09:22:39.549	59768	64497	62503	64196
2014-10-01 09:22:39.555	59788	64486	62511	64179
2014-10-01 09:22:39.559	59757	64496	62478	64178
2014-10-01 09:22:39.565	59770	64485	62495	64197
2014-10-01 09:22:39.569	59773	64475	62532	64282
2014-10-01 09:22:39.575	59772	64493	62540	64334
2014-10-01 09:22:39.579	59741	64504	62543	64303
2014-10-01 09:22:39.585	59739	64499	62555	64294
2014-10-01 09:22:39.589	59811	64492	62582	64300
2014-10-01 09:22:39.595	59791	64503	62576	64312
2014-10-01 09:22:39.599	59739	64490	62525	64330
2014-10-01 09:22:39.605	59773	64495	62510	64334
2014-10-01 09:22:39.609	59810	64506	62547	64306
2014-10-01 09:22:39.615	59772	64476	62562	64238
2014-10-01 09:22:39.619	59767	64480	62532	64216
2014-10-01 09:22:39.625	59771	64495	62492	64220
2014-10-01 09:22:39.630	59772	64489	62486	64209
2014-10-01 09:22:39.634	59790	64491	62483	64207
2014-10-01 09:22:39.640	59749	64477	62468	64205
2014-10-01 09:22:39.644	59774	64492	62484	64263
2014-10-01 09:22:39.650	59788	64504	62466	64306
2014-10-01 09:22:39.654	59746	64480	62467	64266
2014-10-01 09:22:39.660	59762	64508	62481	64286
2014-10-01 09:22:39.664	59773	64502	62440	64316
2014-10-01 09:22:39.670	59778	64489	62472	64291
2014-10-01 09:22:39.674	59773	64502	62496	64288
2014-10-01 09:22:39.680	59759	64483	62469	64273
2014-10-01 09:22:39.684	59767	64500	62508	64267
2014-10-01 09:22:39.690	59781	64493	62520	64279
2014-10-01 09:22:39.694	59767	64482	62533	64272
2014-10-01 09:22:39.700	59749	64490	62557	64292
2014-10-01 09:22:39.704	59770	64488	62534	64303
2014-10-01 09:22:39.710	59775	64509	62549	64294
2014-10-01 09:22:39.714	59777	64506	62540	64261
2014-10-01 09:22:39.720	59750	64492	62506	64184
2014-10-01 09:22:39.724	59760	64491	62519	64176
2014-10-01 09:22:39.730	59796	64512	62515	64231
2014-10-01 09:22:39.734	59754	64532	62509	64300
2014-10-01 09:22:39.740	59776	64501	62496	64354
2014-10-01 09:22:39.744	59784	64504	62512	64315
2014-10-01 09:22:39.750	59774	64521	62533	64283
2014-10-01 09:22:39.755	59790	64497	62505	64325
2014-10-01 09:22:39.759	59762	64510	62497	64329
2014-10-01 09:22:39.765	59788	64513	62502	64305
2014-10-01 09:22:39.769	59787	64491	62539	64313
2014-10-01 09:22:39.775	59785	64515	62547	64267
2014-10-01 09:22:39.779	59800	64508	62515	64211
2014-10-01 09:22:39.785	59748	64491	62544	64233
2014-10-01 09:22:39.789	59763	64516	62542	64246
2014-10-01 09:22:39.795	59815	64499	62542	64228
2014-10-01 09:22:39.799	59800	64489	62558	64228
2014-10-01 09:22:39.805	59767	64519	62513	64260
2014-10-01 09:22:39.809	59771	64504	62513	64270
2014-10-01 09:22:39.815	59789	64479	62503	64269
2014-10-01 09:22:39.819	59783	64500	62467	64336
2014-10-01 09:22:39.825	59766	64525	62503	64347
2014-10-01 09:22:39.829	59765	64505	62509	64304
2014-10-01 09:22:39.835	59790	64488	62488	64283
2014-10-01 09:22:39.839	59802	64505	62496	64253
2014-10-01 09:22:39.845	59769	64503	62515	64264
2014-10-01 09:22:39.849	59748	64505	62554	64272
2014-10-01 09:22:39.855	59788	64501	62554	64267
2014-10-01 09:22:39.859	59794	64486	62531	64265
2014-10-01 09:22:39.865	59754	64489	62531	64279
2014-10-01 09:22:39.869	59753	64510	62545	64328
2014-10-01 09:22:39.875	59773	64532	62556	64320
2014-10-01 09:22:39.880	59781	64495	62523	64308
2014-10-01 09:22:39.884	59775	64499	62502	64299
2014-10-01 09:22:39.890	59761	64523	62502	64262
2014-10-01 09:22:39.894	59768	64506	62521	64256
2014-10-01 09:22:39.900	59802	64526	62536	64240
2014-10-01 09:22:39.904	59788	64511	62493	64251
2014-10-01 09:22:39.910	59751	64507	62510	64290
2014-10-01 09:22:39.914	59769	64517	62538	64286
2014-10-01 09:22:39.920	59797	64508	62514	64277
2014-10-01 09:22:39.924	59772	64513	62536	64282
2014-10-01 09:22:39.930	59753	64485	62558	64266
2014-10-01 09:22:39.934	59796	64495	62545	64228
2014-10-01 09:22:39.940	59791	64516	62531	64209
2014-10-01 09:22:39.944	59761	64497	62528	64239
2014-10-01 09:22:39.950	59780	64507	62526	64297
2014-10-01 09:22:39.954	59799	64515	62526	64334
2014-10-01 09:22:39.960	59792	64509	62511	64327
2014-10-01 09:22:39.964	59769	64518	62506	64316
2014-10-01 09:22:39.970	59766	64507	62490	64315
2014-10-01 09:22:39.974	59772	64511	62466	64314
2014-10-01 09:22:39.980	59781	64518	62518	64302
2014-10-01 09:22:39.984	59763	64502	62520	64282
2014-10-01 09:22:39.990	59763	64526	62499	64311
2014-10-01 09:22:39.994	59808	64524	62506	64323
2014-10-01 09:22:40.000	59786	64503	62474	64259
2014-10-01 09:22:40.005	59759	64497	62506	64248
2014-10-01 09:22:40.009	59794	64503	62524	64267
2014-10-01 09:22:40.015	59801	64518	62513	64225
2014-10-01 09:22:40.019	59765	64500	62524	64200
2014-10-01 09:22:40.025	59752	64515	62532	64241
2014-10-01 09:22:40.029	59794	64520	62540	64284
2014-10-01 09:22:40.035	59791	64500	62518	64276
2014-10-01 09:22:40.039	59747	64518	62539	64274
2014-10-01 09:22:40.045	59795	64529	62596	64278
2014-10-01 09:22:40.049	59800	64523	62593	64281
2014-10-01 09:22:40.055	59751	64502	62574	64311
2014-10-01 09:22:40.059	59780	64511	62576	64284
2014-10-01 09:22:40.065	59778	64533	62579	64311
2014-10-01 09:22:40.069	59776	64520	62576	64375
2014-10-01 09:22:40.075	59791	64520	62542	64331
2014-10-01 09:22:40.079	59766	64503	62519	64288
2014-10-01 09:22:40.085	59777	64507	62526	64246
2014-10-01 09:22:40.089	59781	64531	62525	64224
2014-10-01 09:22:40.095	59771	64509	62558	64233
2014-10-01 09:22:40.099	59798	64504	62577	64239
2014-10-01 09:22:40.105	59804	64511	62560	64276
2014-10-01 09:22:40.109	59788	64518	62531	64292
2014-10-01 09:22:40.115	59784	64521	62505	64327
2014-10-01 09:22:40.119	59790	64511	62518	64369
2014-10-01 09:22:40.125	59798	64525	62499	64347
2014-10-01 09:22:40.130	59771	64527	62496	64302
2014-10-01 09:22:40.134	59773	64513	62522	64276
2014-10-01 09:22:40.140	59803	64503	62504	64287
2014-10-01 09:22:40.144	59776	64519	62484	64295
2014-10-01 09:22:40.150	59773	64523	62477	64302
2014-10-01 09:22:40.154	59796	64501	62494	64312
2014-10-01 09:22:40.160	59791	64539	62517	64272
2014-10-01 09:22:40.164	59783	64546	62510	64210
2014-10-01 09:22:40.170	59787	64487	62508	64210
2014-10-01 09:22:40.174	59798	64494	62521	64276
2014-10-01 09:22:40.180	59780	64522	62538	64306
2014-10-01 09:22:40.184	59773	64514	62552	64286
2014-10-01 09:22:40.190	59798	64512	62557	64299
2014-10-01 09:22:40.194	59797	64516	62559	64308
2014-10-01 09:22:40.200	59788	64539	62569	64263
2014-10-01 09:22:40.204	59780	64533	62561	64239
2014-10-01 09:22:40.210	59779	64507	62557	64287
2014-10-01 09:22:40.214	59795	64528	62558	64310
2014-10-01 09:22:40.220	59803	64525	62552	64277
2014-10-01 09:22:40.224	59789	64518	62559	64266
2014-10-01 09:22:40.230	59789	64528	62564	64269
2014-10-01 09:22:40.234	59801	64526	62570	64265
2014-10-01 09:22:40.240	59776	64541	62541	64263
2014-10-01 09:22:40.244	59757	64529	62517	64262
2014-10-01 09:22:40.250	59786	64519	62500	64308
2014-10-01 09:22:40.255	59778	64528	62461	64362
2014-10-01 09:22:40.259	59751	64520	62484	64347
2014-10-01 09:22:40.265	59773	64531	62507	64331
2014-10-01 09:22:40.269	59793	64554	62520	64371
2014-10-01 09:22:40.275	59811	64547	62517	64395
2014-10-01 09:22:40.279	59790	64507	62485	64315
2014-10-01 09:22:40.285	59756	64531	62539	64247
2014-10-01 09:22:40.289	59800	64557	62578	64271
2014-10-01 09:22:40.295	59813	64529	62569	64294
2014-10-01 09:22:40.299	59771	64520	62558	64291
2014-10-01 09:22:40.305	59798	64509	62524	64265
2014-10-01 09:22:40.309	59822	64542	62527	64246
2014-10-01 09:22:40.315	59778	64553	62543	64236
2014-10-01 09:22:40.319	59765	64522	62523	64221
2014-10-01 09:22:40.325	59778	64532	62478	64247
2014-10-01 09:22:40.329	59792	64544	62481	64292
2014-10-01 09:22:40.335	59807	64537	62533	64327
2014-10-01 09:22:40.339	59782	64515	62522	64313
2014-10-01 09:22:40.345	59786	64525	62523	64284
2014-10-01 09:22:40.349	59789	64546	62566	64317
2014-10-01 09:22:40.355	59782	64531	62541	64322
2014-10-01 09:22:40.359	59803	64512	62503	64313
2014-10-01 09:22:40.365	59792	64542	62508	64376
2014-10-01 09:22:40.369	59781	64555	62514	64398
2014-10-01 09:22:40.375	59802	64521	62507	64333
2014-10-01 09:22:40.380	59805	64525	62478	64273
2014-10-01 09:22:40.384	59805	64527	62470	64254
2014-10-01 09:22:40.390	59804	64522	62492	64233
2014-10-01 09:22:40.394	59777	64529	62503	64220
2014-10-01 09:22:40.400	59802	64536	62520	64261
2014-10-01 09:22:40.404	59804	64535	62511	64287
2014-10-01 09:22:40.410	59773	64563	62480	64265
2014-10-01 09:22:40.414	59808	64558	62489	64267
2014-10-01 09:22:40.420	59791	64504	62505	64269
2014-10-01 09:22:40.424	59788	64549	62528	64288
2014-10-01 09:22:40.430	59808	64562	62547	64327
2014-10-01 09:22:40.434	59782	64517	62543	64327
2014-10-01 09:22:40.440	59793	64547	62563	64346
2014-10-01 09:22:40.444	59803	64572	62566	64346
2014-10-01 09:22:40.450	59801	64545	62542	64296
2014-10-01 09:22:40.454	59805	64530	62556	64274
2014-10-01 09:22:40.460	59806	64570	62570	64292
2014-10-01 09:22:40.464	59788	64566	62548	64304
2014-10-01 09:22:40.470	59778	64533	62536	64252
2014-10-01 09:22:40.474	59789	64549	62557	64234
2014-10-01 09:22:40.480	59785	64567	62564	64266
2014-10-01 09:22:40.484	59779	64562	62558	64256
2014-10-01 09:22:40.490	59792	64520	62570	64277
2014-10-01 09:22:40.494	59811	64537	62559	64317
2014-10-01 09:22:40.500	59795	64553	62535	64338
2014-10-01 09:22:40.505	59776	64525	62514	64349
2014-10-01 09:22:40.509	59800	64540	62498	64359
2014-10-01 09:22:40.515	59802	64523	62515	64395
2014-10-01 09:22:40.519	59784	64547	62519	64376
2014-10-01 09:22:40.525	59800	64551	62527	64334
2014-10-01 09:22:40.529	59790	64539	62546	64327
2014-10-01 09:22:40.535	59782	64567	62506	64296
2014-10-01 09:22:40.539	59787	64517	62475	64257
2014-10-01 09:22:40.545	59791	64532	62491	64238
2014-10-01 09:22:40.549	59790	64577	62509	64253
2014-10-01 09:22:40.555	59773	64560	62530	64270
2014-10-01 09:22:40.559	59804	64534	62537	64268
2014-10-01 09:22:40.565	59804	64538	62534	64253
2014-10-01 09:22:40.569	59769	64573	62541	64228
2014-10-01 09:22:40.575	59786	64556	62535	64253
2014-10-01 09:22:40.579	59805	64544	62508	64259
2014-10-01 09:22:40.585	59803	64541	62499	64262
2014-10-01 09:22:40.589	59791	64539	62516	64314
2014-10-01 09:22:40.595	59801	64551	62526	64348
2014-10-01 09:22:40.599	59803	64545	62522	64363
2014-10-01 09:22:40.605	59784	64562	62531	64353
2014-10-01 09:22:40.609	59774	64577	62536	64354
2014-10-01 09:22:40.615	59775	64530	62503	64333
2014-10-01 09:22:40.619	59801	64536	62476	64310
2014-10-01 09:22:40.625	59801	64576	62471	64341
2014-10-01 09:22:40.630	59788	64552	62469	64334
2014-10-01 09:22:40.634	59796	64554	62464	64293
2014-10-01 09:22:40.640	59803	64551	62478	64270
2014-10-01 09:22:40.644	59796	64564	62495	64302
2014-10-01 09:22:40.650	59793	64580	62491	64277
2014-10-01 09:22:40.654	59809	64556	62501	64213
2014-10-01 09:22:40.660	59806	64555	62495	64253
2014-10-01 09:22:40.664	59804	64546	62508	64285
2014-10-01 09:22:40.670	59798	64553	62543	64281
2014-10-01 09:22:40.674	59798	64555	62557	64270
2014-10-01 09:22:40.680	59792	64559	62549	64270
2014-10-01 09:22:40.684	59784	64556	62537	64297
2014-10-01 09:22:40.690	59792	64540	62552	64288
2014-10-01 09:22:40.694	59785	64569	62548	64297
2014-10-01 09:22:40.700	59796	64569	62541	64323
2014-10-01 09:22:40.704	59795	64554	62545	64311
2014-10-01 09:22:40.710	59798	64551	62559	64282
2014-10-01 09:22:40.714	59781	64556	62573	64286
2014-10-01 09:22:40.720	59782	64571	62546	64327
2014-10-01 09:22:40.724	59809	64552	62545	64337
2014-10-01 09:22:40.730	59792	64556	62565	64345
2014-10-01 09:22:40.734	59801	64565	62549	64361
2014-10-01 09:22:40.740	59786	64548	62514	64317
2014-10-01 09:22:40.744	59796	64547	62511	64277
2014-10-01 09:22:40.750	59805	64566	62540	64259
2014-10-01 09:22:40.755	59788	64569	62531	64260
2014-10-01 09:22:40.759	59823	64538	62499	64294
2014-10-01 09:22:40.765	59796	64562	62493	64288
2014-10-01 09:22:40.769	59783	64564	62514	64285
2014-10-01 09:22:40.775	59831	64560	62511	64282
2014-10-01 09:22:40.779	59791	64562	62497	64219
2014-10-01 09:22:40.785	59770	64536	62484	64182
2014-10-01 09:22:40.789	59824	64570	62490	64216
2014-10-01 09:22:40.795	59790	64543	62535	64271
2014-10-01 09:22:40.799	59794	64529	62538	64316
2014-10-01 09:22:40.805	59808	64586	62534	64373
2014-10-01 09:22:40.809	59789	64553	62549	64390
2014-10-01 09:22:40.815	59822	64534	62529	64363
2014-10-01 09:22:40.819	59791	64564	62520	64355
2014-10-01 09:22:40.825	59824	64550	62507	64344
2014-10-01 09:22:40.829	59810	64534	62504	64320
2014-10-01 09:22:40.835	59752	64554	62512	64300
2014-10-01 09:22:40.839	59832	64569	62475	64269
2014-10-01 09:22:40.845	59798	64560	62493	64264
2014-10-01 09:22:40.849	59782	64531	62543	64305
2014-10-01 09:22:40.855	59814	64558	62539	64285
2014-10-01 09:22:40.859	59786	64578	62538	64245
2014-10-01 09:22:40.865	59816	64535	62543	64302
2014-10-01 09:22:40.869	59787	64560	62528	64365
2014-10-01 09:22:40.875	59762	64554	62528	64337
2014-10-01 09:22:40.880	59794	64540	62528	64301
2014-10-01 09:22:40.884	59798	64579	62494	64328
2014-10-01 09:22:40.890	59805	64573	62499	64315
2014-10-01 09:22:40.894	59783	64559	62524	64289
2014-10-01 09:22:40.900	59785	64535	62502	64345
2014-10-01 09:22:40.904	59811	64542	62503	64338
2014-10-01 09:22:40.910	59773	64588	62516	64272
2014-10-01 09:22:40.914	59792	64559	62514	64260
2014-10-01 09:22:40.920	59811	64529	62508	64250
2014-10-01 09:22:40.924	59775	64566	62492	64231
2014-10-01 09:22:40.930	59783	64576	62516	64257
2014-10-01 09:22:40.934	59769	64579	62527	64293
2014-10-01 09:22:40.940	59783	64576	62500	64293
2014-10-01 09:22:40.944	59799	64552	62501	64320
2014-10-01 09:22:40.950	59777	64573	62522	64345
2014-10-01 09:22:40.954	59788	64566	62536	64319
2014-10-01 09:22:40.960	59786	64555	62539	64325
2014-10-01 09:22:40.964	59810	64559	62526	64342
2014-10-01 09:22:40.970	59803	64556	62499	64324
2014-10-01 09:22:40.974	59770	64583	62508	64330
2014-10-01 09:22:40.980	59803	64573	62524	64323
2014-10-01 09:22:40.984	59801	64562	62511	64278
2014-10-01 09:22:40.990	59778	64555	62514	64276
2014-10-01 09:22:40.994	59783	64548	62500	64308
2014-10-01 09:22:41.000	59778	64576	62497	64308
2014-10-01 09:22:41.005	59792	64547	62518	64293
2014-10-01 09:22:41.009	59834	64532	62497	64286
2014-10-01 09:22:41.015	59795	64578	62497	64265
2014-10-01 09:22:41.019	59771	64578	62520	64231
2014-10-01 09:22:41.025	59811	64539	62522	64237
2014-10-01 09:22:41.029	59796	64548	62528	64278
2014-10-01 09:22:41.035	59785	64577	62529	64310
2014-10-01 09:22:41.039	59795	64570	62522	64311
2014-10-01 09:22:41.045	59819	64550	62509	64331
2014-10-01 09:22:41.049	59818	64558	62505	64349
2014-10-01 09:22:41.055	59771	64585	62519	64295
2014-10-01 09:22:41.059	59785	64549	62527	64257
2014-10-01 09:22:41.065	59815	64537	62536	64250
2014-10-01 09:22:41.069	59788	64586	62556	64247
2014-10-01 09:22:41.075	59801	64570	62563	64295
2014-10-01 09:22:41.079	59799	64545	62544	64356
2014-10-01 09:22:41.085	59785	64553	62536	64390
2014-10-01 09:22:41.089	59817	64593	62524	64367
2014-10-01 09:22:41.095	59789	64566	62493	64334
2014-10-01 09:22:41.099	59796	64543	62491	64336
2014-10-01 09:22:41.105	59794	64599	62493	64330
2014-10-01 09:22:41.109	59786	64549	62483	64364
2014-10-01 09:22:41.115	59827	64538	62481	64385
2014-10-01 09:22:41.119	59770	64571	62469	64316
2014-10-01 09:22:41.125	59763	64573	62470	64248
2014-10-01 09:22:41.130	59801	64560	62477	64198
2014-10-01 09:22:41.134	59807	64542	62468	64141
2014-10-01 09:22:41.140	59800	64560	62460	64147
2014-10-01 09:22:41.144	59790	64554	62454	64210
2014-10-01 09:22:41.150	59801	64572	62475	64256
2014-10-01 09:22:41.154	59763	64535	62503	64264
2014-10-01 09:22:41.160	59789	64544	62488	64270
2014-10-01 09:22:41.164	59804	64600	62482	64305
2014-10-01 09:22:41.170	59748	64544	62492	64310
2014-10-01 09:22:41.174	59803	64523	62486	64318
2014-10-01 09:22:41.180	59820	64552	62507	64362
2014-10-01 09:22:41.184	59773	64578	62540	64358
2014-10-01 09:22:41.190	59781	64557	62554	64354
2014-10-01 09:22:41.194	59801	64533	62553	64341
2014-10-01 09:22:41.200	59807	64563	62541	64307
2014-10-01 09:22:41.204	59785	64586	62545	64358
2014-10-01 09:22:41.210	59804	64573	62538	64381
2014-10-01 09:22:41.214	59796	64556	62537	64308
2014-10-01 09:22:41.220	59764	64564	62555	64260
2014-10-01 09:22:41.224	59799	64564	62530	64244
2014-10-01 09:22:41.230	59792	64580	62504	64230
2014-10-01 09:22:41.234	59775	64560	62492	64239
2014-10-01 09:22:41.240	59798	64530	62474	64270
2014-10-01 09:22:41.244	59801	64581	62490	64297
2014-10-01 09:22:41.250	59783	64594	62495	64297
2014-10-01 09:22:41.255	59791	64546	62471	64311
2014-10-01 09:22:41.259	59771	64538	62494	64294
2014-10-01 09:22:41.265	59800	64571	62514	64253
2014-10-01 09:22:41.269	59823	64591	62479	64298
2014-10-01 09:22:41.275	59755	64562	62470	64339
2014-10-01 09:22:41.279	59793	64539	62468	64330
2014-10-01 09:22:41.285	59791	64591	62476	64326
2014-10-01 09:22:41.289	59777	64574	62489	64293
2014-10-01 09:22:41.295	59809	64516	62470	64253
2014-10-01 09:22:41.299	59757	64552	62491	64263
2014-10-01 09:22:41.305	59783	64561	62491	64292
2014-10-01 09:22:41.309	59809	64554	62479	64292
2014-10-01 09:22:41.315	59774	64548	62504	64295
2014-10-01 09:22:41.319	59779	64570	62518	64302
2014-10-01 09:22:41.325	59778	64563	62532	64302
2014-10-01 09:22:41.329	59767	64526	62537	64294
2014-10-01 09:22:41.335	59792	64590	62548	64292
2014-10-01 09:22:41.339	59777	64557	62555	64299
2014-10-01 09:22:41.345	59775	64524	62526	64290
2014-10-01 09:22:41.349	59805	64591	62491	64282
2014-10-01 09:22:41.355	59764	64585	62497	64259
2014-10-01 09:22:41.359	59781	64560	62494	64251
2014-10-01 09:22:41.365	59797	64561	62458	64311
2014-10-01 09:22:41.369	59764	64573	62460	64350
2014-10-01 09:22:41.375	59778	64566	62459	64340
2014-10-01 09:22:41.380	59792	64560	62453	64344
2014-10-01 09:22:41.384	59792	64574	62471	64335
2014-10-01 09:22:41.390	59791	64556	62468	64293
2014-10-01 09:22:41.394	59776	64550	62468	64258
2014-10-01 09:22:41.400	59778	64587	62481	64255
2014-10-01 09:22:41.404	59796	64563	62479	64252
2014-10-01 09:22:41.410	59775	64548	62482	64241
2014-10-01 09:22:41.414	59789	64567	62503	64241
2014-10-01 09:22:41.420	59788	64569	62521	64242
2014-10-01 09:22:41.424	59786	64581	62509	64262
2014-10-01 09:22:41.430	59816	64545	62474	64256
2014-10-01 09:22:41.434	59761	64546	62455	64240
2014-10-01 09:22:41.440	59766	64592	62473	64287
2014-10-01 09:22:41.444	59808	64583	62485	64285
2014-10-01 09:22:41.450	59786	64549	62477	64280
2014-10-01 09:22:41.454	59768	64554	62498	64338
2014-10-01 09:22:41.460	59773	64586	62509	64377
2014-10-01 09:22:41.464	59795	64546	62486	64373
2014-10-01 09:22:41.470	59802	64545	62495	64323
2014-10-01 09:22:41.474	59778	64590	62508	64288
2014-10-01 09:22:41.480	59758	64555	62515	64256
2014-10-01 09:22:41.484	59785	64545	62521	64257
2014-10-01 09:22:41.490	59774	64574	62490	64281
2014-10-01 09:22:41.494	59759	64564	62494	64264
2014-10-01 09:22:41.500	59782	64544	62515	64296
2014-10-01 09:22:41.505	59769	64517	62476	64312
2014-10-01 09:22:41.509	59792	64556	62447	64291
2014-10-01 09:22:41.515	59772	64569	62465	64293
2014-10-01 09:22:41.519	59758	64531	62459	64273
2014-10-01 09:22:41.525	59810	64560	62415	64290
2014-10-01 09:22:41.529	59772	64540	62438	64301
2014-10-01 09:22:41.535	59744	64549	62476	64286
2014-10-01 09:22:41.539	59780	64571	62459	64291
2014-10-01 09:22:41.545	59783	64542	62472	64269
2014-10-01 09:22:41.549	59764	64550	62505	64272
2014-10-01 09:22:41.555	59770	64541	62511	64281
2014-10-01 09:22:41.559	59784	64546	62506	64264
2014-10-01 09:22:41.565	59782	64571	62500	64264
2014-10-01 09:22:41.569	59764	64574	62511	64264
2014-10-01 09:22:41.575	59770	64519	62523	64267
2014-10-01 09:22:41.579	59781	64544	62494	64264
2014-10-01 09:22:41.585	59761	64587	62463	64286
2014-10-01 09:22:41.589	59771	64522	62454	64332
2014-10-01 09:22:41.595	59765	64536	62465	64327
2014-10-01 09:22:41.599	59760	64557	62479	64294
2014-10-01 09:22:41.605	59780	64568	62475	64254
2014-10-01 09:22:41.609	59763	64564	62488	64249
2014-10-01 09:22:41.615	59759	64519	62484	64262
2014-10-01 09:22:41.619	59767	64561	62476	64270
2014-10-01 09:22:41.625	59773	64558	62475	64293
2014-10-01 09:22:41.630	59783	64522	62458	64260
2014-10-01 09:22:41.634	59790	64563	62469	64252
2014-10-01 09:22:41.640	59769	64565	62450	64270
2014-10-01 09:22:41.644	59760	64526	62426	64251
2014-10-01 09:22:41.650	59792	64554	62443	64258
2014-10-01 09:22:41.654	59768	64558	62450	64261
2014-10-01 09:22:41.660	59739	64520	62462	64263
2014-10-01 09:22:41.664	59771	64552	62469	64279
2014-10-01 09:22:41.670	59784	64552	62457	64301
2014-10-01 09:22:41.674	59752	64526	62458	64314
2014-10-01 09:22:41.680	59746	64541	62457	64290
2014-10-01 09:22:41.684	59761	64558	62454	64280
2014-10-01 09:22:41.690	59755	64551	62486	64295
2014-10-01 09:22:41.694	59787	64540	62507	64301
2014-10-01 09:22:41.700	59792	64561	62487	64271
2014-10-01 09:22:41.704	59743	64550	62481	64251
2014-10-01 09:22:41.710	59789	64539	62477	64247
2014-10-01 09:22:41.714	59779	64539	62457	64239
2014-10-01 09:22:41.720	59730	64535	62441	64264
2014-10-01 09:22:41.724	59774	64532	62435	64275
2014-10-01 09:22:41.730	59765	64542	62458	64303
2014-10-01 09:22:41.734	59763	64566	62493	64343
2014-10-01 09:22:41.740	59755	64539	62481	64330
2014-10-01 09:22:41.744	59751	64517	62459	64319
2014-10-01 09:22:41.750	59759	64529	62456	64282
2014-10-01 09:22:41.755	59761	64544	62467	64238
2014-10-01 09:22:41.759	59781	64522	62494	64236
2014-10-01 09:22:41.765	59731	64524	62468	64245
2014-10-01 09:22:41.769	59767	64559	62458	64278
2014-10-01 09:22:41.775	59790	64533	62471	64296
2014-10-01 09:22:41.779	59743	64531	62407	64259
2014-10-01 09:22:41.785	59755	64535	62394	64210
2014-10-01 09:22:41.789	59737	64528	62452	64188
2014-10-01 09:22:41.795	59792	64539	62482	64175
2014-10-01 09:22:41.799	59778	64540	62477	64185
2014-10-01 09:22:41.805	59701	64558	62459	64226
2014-10-01 09:22:41.809	59760	64538	62477	64274
2014-10-01 09:22:41.815	59754	64523	62478	64326
2014-10-01 09:22:41.819	59771	64551	62437	64349
2014-10-01 09:22:41.825	59748	64546	62428	64361
2014-10-01 09:22:41.829	59692	64537	62445	64352
2014-10-01 09:22:41.835	59801	64519	62458	64308
2014-10-01 09:22:41.839	59757	64529	62467	64261
2014-10-01 09:22:41.845	59699	64551	62448	64190
2014-10-01 09:22:41.849	59774	64537	62416	64176
2014-10-01 09:22:41.855	59776	64545	62435	64219
2014-10-01 09:22:41.859	59759	64538	62465	64239
2014-10-01 09:22:41.865	59736	64538	62461	64264
2014-10-01 09:22:41.869	59746	64542	62456	64267
2014-10-01 09:22:41.875	59756	64544	62455	64243
2014-10-01 09:22:41.880	59727	64533	62436	64234
2014-10-01 09:22:41.884	59750	64516	62431	64264
2014-10-01 09:22:41.890	59761	64562	62458	64300
2014-10-01 09:22:41.894	59746	64553	62456	64283
2014-10-01 09:22:41.900	59728	64518	62457	64240
2014-10-01 09:22:41.904	59715	64532	62470	64222
2014-10-01 09:22:41.910	59795	64532	62482	64233
2014-10-01 09:22:41.914	59740	64527	62493	64248
2014-10-01 09:22:41.920	59685	64536	62484	64237
2014-10-01 09:22:41.924	59791	64529	62483	64226
2014-10-01 09:22:41.930	59738	64532	62477	64260
2014-10-01 09:22:41.934	59729	64539	62463	64269
2014-10-01 09:22:41.940	59743	64506	62469	64276
2014-10-01 09:22:41.944	59709	64522	62459	64302
2014-10-01 09:22:41.950	59769	64521	62455	64286
2014-10-01 09:22:41.954	59745	64500	62478	64296
2014-10-01 09:22:41.960	59732	64532	62489	64241
2014-10-01 09:22:41.964	59728	64513	62486	64187
2014-10-01 09:22:41.970	59715	64505	62476	64246
2014-10-01 09:22:41.974	59761	64534	62449	64259
2014-10-01 09:22:41.980	59734	64517	62440	64268
2014-10-01 09:22:41.984	59719	64503	62444	64280
2014-10-01 09:22:41.990	59751	64513	62443	64259
2014-10-01 09:22:41.994	59732	64512	62462	64249
2014-10-01 09:22:42.000	59737	64497	62470	64262
2014-10-01 09:22:42.005	59752	64498	62442	64286
2014-10-01 09:22:42.009	59741	64533	62427	64232
2014-10-01 09:22:42.015	59742	64515	62427	64217
2014-10-01 09:22:42.019	59733	64506	62437	64240
2014-10-01 09:22:42.025	59753	64531	62446	64207
2014-10-01 09:22:42.029	59752	64507	62414	64206
2014-10-01 09:22:42.035	59719	64517	62399	64201
2014-10-01 09:22:42.039	59714	64509	62426	64182
2014-10-01 09:22:42.045	59715	64523	62423	64198
2014-10-01 09:22:42.049	59767	64545	62437	64254
2014-10-01 09:22:42.055	59719	64512	62465	64276
2014-10-01 09:22:42.059	59682	64524	62448	64245
2014-10-01 09:22:42.065	59776	64490	62436	64250
2014-10-01 09:22:42.069	59717	64479	62425	64225
2014-10-01 09:22:42.075	59679	64515	62419	64188
2014-10-01 09:22:42.079	59725	64499	62431	64246
2014-10-01 09:22:42.085	59724	64489	62435	64286
2014-10-01 09:22:42.089	59749	64503	62448	64281
2014-10-01 09:22:42.095	59725	64532	62471	64290
2014-10-01 09:22:42.099	59707	64513	62475	64272
2014-10-01 09:22:42.105	59733	64496	62453	64239
2014-10-01 09:22:42.109	59736	64509	62441	64217
2014-10-01 09:22:42.115	59704	64515	62432	64208
2014-10-01 09:22:42.119	59723	64514	62409	64204
2014-10-01 09:22:42.125	59738	64488	62391	64208
2014-10-01 09:22:42.130	59701	64487	62363	64255
2014-10-01 09:22:42.134	59728	64506	62353	64270
2014-10-01 09:22:42.140	59729	64499	62355	64239
2014-10-01 09:22:42.144	59701	64484	62366	64237
2014-10-01 09:22:42.150	59723	64498	62381	64213
2014-10-01 09:22:42.154	59718	64494	62379	64182
2014-10-01 09:22:42.160	59702	64466	62388	64203
2014-10-01 09:22:42.164	59727	64502	62419	64225
2014-10-01 09:22:42.170	59717	64497	62454	64241
2014-10-01 09:22:42.174	59707	64489	62489	64290
2014-10-01 09:22:42.180	59742	64530	62517	64310
2014-10-01 09:22:42.184	59715	64500	62532	64273
2014-10-01 09:22:42.190	59688	64475	62510	64226
2014-10-01 09:22:42.194	59722	64491	62453	64207
2014-10-01 09:22:42.200	59724	64499	62412	64212
2014-10-01 09:22:42.204	59688	64485	62371	64205
2014-10-01 09:22:42.210	59714	64468	62349	64208
2014-10-01 09:22:42.214	59751	64488	62371	64225
2014-10-01 09:22:42.220	59692	64511	62392	64234
2014-10-01 09:22:42.224	59704	64506	62439	64253
2014-10-01 09:22:42.230	59773	64498	62454	64286
2014-10-01 09:22:42.234	59693	64485	62442	64301
2014-10-01 09:22:42.240	59672	64472	62434	64237
2014-10-01 09:22:42.244	59744	64473	62426	64175
2014-10-01 09:22:42.250	59731	64475	62462	64202
2014-10-01 09:22:42.255	59710	64519	62456	64202
2014-10-01 09:22:42.259	59705	64515	62452	64173
2014-10-01 09:22:42.265	59703	64465	62436	64163
2014-10-01 09:22:42.269	59703	64483	62405	64148
2014-10-01 09:22:42.275	59709	64476	62456	64145
2014-10-01 09:22:42.279	59694	64466	62472	64142
2014-10-01 09:22:42.285	59689	64484	62459	64183
2014-10-01 09:22:42.289	59717	64467	62450	64254
2014-10-01 09:22:42.295	59714	64452	62439	64315
2014-10-01 09:22:42.299	59701	64467	62444	64352
2014-10-01 09:22:42.305	59679	64479	62407	64317
2014-10-01 09:22:42.309	59705	64477	62368	64265
2014-10-01 09:22:42.315	59733	64478	62389	64237
2014-10-01 09:22:42.319	59679	64456	62407	64230
2014-10-01 09:22:42.325	59687	64456	62410	64239
2014-10-01 09:22:42.329	59718	64460	62444	64228
2014-10-01 09:22:42.335	59699	64451	62427	64203
2014-10-01 09:22:42.339	59713	64493	62402	64158
2014-10-01 09:22:42.345	59680	64492	62424	64098
2014-10-01 09:22:42.349	59684	64467	62409	64100
2014-10-01 09:22:42.355	59750	64461	62401	64140
2014-10-01 09:22:42.359	59671	64439	62414	64164
2014-10-01 09:22:42.365	59675	64469	62403	64195
2014-10-01 09:22:42.369	59729	64465	62366	64216
2014-10-01 09:22:42.375	59670	64435	62368	64246
2014-10-01 09:22:42.380	59690	64466	62415	64270
2014-10-01 09:22:42.384	59680	64460	62421	64279
2014-10-01 09:22:42.390	59682	64453	62404	64295
2014-10-01 09:22:42.394	59702	64472	62389	64255
2014-10-01 09:22:42.400	59668	64470	62407	64196
2014-10-01 09:22:42.404	59688	64456	62447	64167
2014-10-01 09:22:42.410	59694	64447	62441	64174
2014-10-01 09:22:42.414	59704	64458	62435	64192
2014-10-01 09:22:42.420	59678	64446	62437	64191
2014-10-01 09:22:42.424	59679	64459	62420	64222
2014-10-01 09:22:42.430	59706	64468	62404	64236
2014-10-01 09:22:42.434	59673	64450	62417	64212
2014-10-01 09:22:42.440	59702	64440	62414	64154
2014-10-01 09:22:42.444	59667	64425	62377	64094
2014-10-01 09:22:42.450	59665	64478	62387	64120
2014-10-01 09:22:42.454	59734	64474	62416	64160
2014-10-01 09:22:42.460	59679	64441	62425	64183
2014-10-01 09:22:42.464	59676	64495	62417	64178
2014-10-01 09:22:42.470	59685	64447	62392	64177
2014-10-01 09:22:42.474	59691	64422	62403	64175
2014-10-01 09:22:42.480	59681	64493	62413	64144
2014-10-01 09:22:42.484	59651	64458	62417	64208
2014-10-01 09:22:42.490	59712	64439	62416	64261
2014-10-01 09:22:42.494	59698	64455	62388	64281
2014-10-01 09:22:42.500	59662	64441	62390	64328
2014-10-01 09:22:42.505	59670	64465	62410	64304
2014-10-01 09:22:42.509	59679	64455	62414	64259
2014-10-01 09:22:42.515	59695	64439	62410	64192
2014-10-01 09:22:42.519	59661	64455	62401	64139
2014-10-01 09:22:42.525	59673	64433	62386	64172
2014-10-01 09:22:42.529	59692	64435	62383	64197
2014-10-01 09:22:42.535	59680	64447	62404	64168
2014-10-01 09:22:42.539	59674	64427	62412	64081
2014-10-01 09:22:42.545	59665	64469	62400	64019
2014-10-01 09:22:42.549	59705	64476	62410	64048
2014-10-01 09:22:42.555	59696	64405	62438	64113
2014-10-01 09:22:42.559	59655	64428	62461	64178
2014-10-01 09:22:42.565	59669	64464	62459	64209
2014-10-01 09:22:42.569	59688	64448	62425	64233
2014-10-01 09:22:42.575	59692	64430	62412	64254
2014-10-01 09:22:42.579	59650	64427	62447	64249
2014-10-01 09:22:42.585	59644	64449	62458	64257
2014-10-01 09:22:42.589	59684	64446	62408	64283
2014-10-01 09:22:42.595	59687	64440	62389	64297
2014-10-01 09:22:42.599	59659	64442	62403	64241
2014-10-01 09:22:42.605	59637	64421	62399	64191
2014-10-01 09:22:42.609	59684	64420	62398	64212
2014-10-01 09:22:42.615	59701	64442	62385	64213
2014-10-01 09:22:42.619	59635	64437	62386	64173
2014-10-01 09:22:42.625	59645	64450	62404	64145
2014-10-01 09:22:42.630	59702	64431	62373	64139
2014-10-01 09:22:42.634	59666	64403	62354	64084
2014-10-01 09:22:42.640	59657	64455	62359	64033
2014-10-01 09:22:42.644	59689	64452	62351	64070
2014-10-01 09:22:42.650	59674	64406	62362	64113
2014-10-01 09:22:42.654	59660	64425	62380	64156
2014-10-01 09:22:42.660	59651	64458	62366	64171
2014-10-01 09:22:42.664	59674	64450	62358	64137
2014-10-01 09:22:42.670	59686	64450	62381	64183
2014-10-01 09:22:42.674	59645	64448	62373	64262
2014-10-01 09:22:42.680	59648	64428	62374	64244
2014-10-01 09:22:42.684	59687	64430	62386	64249
2014-10-01 09:22:42.690	59665	64413	62373	64313
2014-10-01 09:22:42.694	59664	64430	62406	64294
2014-10-01 09:22:42.700	59671	64444	62434	64226
2014-10-01 09:22:42.704	59640	64415	62431	64186
2014-10-01 09:22:42.710	59687	64439	62429	64183
2014-10-01 09:22:42.714	59653	64430	62424	64165
2014-10-01 09:22:42.720	59634	64406	62428	64067
2014-10-01 09:22:42.724	59696	64449	62417	64036
2014-10-01 09:22:42.730	59655	64433	62404	64106
2014-10-01 09:22:42.734	59651	64401	62392	64154
2014-10-01 09:22:42.740	59650	64441	62372	64152
2014-10-01 09:22:42.744	59669	64425	62384	64148
2014-10-01 09:22:42.750	59699	64426	62408	64193
2014-10-01 09:22:42.755	59659	64453	62406	64184
2014-10-01 09:22:42.759	59658	64421	62394	64142
2014-10-01 09:22:42.765	59656	64418	62398	64139
2014-10-01 09:22:42.769	59660	64403	62401	64169
2014-10-01 09:22:42.775	59670	64413	62417	64223
2014-10-01 09:22:42.779	59658	64458	62427	64224
2014-10-01 09:22:42.785	59649	64422	62418	64268
2014-10-01 09:22:42.789	59638	64386	62413	64292
2014-10-01 09:22:42.795	59661	64417	62397	64212
2014-10-01 09:22:42.799	59655	64450	62380	64161
2014-10-01 09:22:42.805	59633	64420	62354	64127
2014-10-01 09:22:42.809	59673	64408	62343	64127
2014-10-01 09:22:42.815	59664	64439	62367	64156
2014-10-01 09:22:42.819	59637	64427	62357	64164
2014-10-01 09:22:42.825	59648	64419	62327	64151
2014-10-01 09:22:42.829	59652	64421	62329	64121
2014-10-01 09:22:42.835	59651	64440	62329	64117
2014-10-01 09:22:42.839	59656	64429	62351	64103
2014-10-01 09:22:42.845	59655	64399	62392	64103
2014-10-01 09:22:42.849	59640	64429	62387	64179
2014-10-01 09:22:42.855	59656	64402	62414	64212
2014-10-01 09:22:42.859	59653	64391	62454	64147
2014-10-01 09:22:42.865	59657	64426	62400	64150
2014-10-01 09:22:42.869	59658	64403	62381	64216
2014-10-01 09:22:42.875	59646	64417	62405	64210
2014-10-01 09:22:42.880	59677	64412	62387	64206
2014-10-01 09:22:42.884	59660	64405	62400	64200
2014-10-01 09:22:42.890	59644	64435	62404	64169
2014-10-01 09:22:42.894	59653	64387	62369	64127
2014-10-01 09:22:42.900	59657	64391	62361	64085
2014-10-01 09:22:42.904	59639	64426	62396	64108
2014-10-01 09:22:42.910	59639	64410	62415	64126
2014-10-01 09:22:42.914	59666	64403	62409	64129
2014-10-01 09:22:42.920	59644	64400	62408	64151
2014-10-01 09:22:42.924	59650	64430	62376	64154
2014-10-01 09:22:42.930	59666	64404	62354	64175
2014-10-01 09:22:42.934	59645	64400	62367	64216
2014-10-01 09:22:42.940	59641	64437	62358	64210
2014-10-01 09:22:42.944	59651	64388	62354	64179
2014-10-01 09:22:42.950	59649	64385	62358	64201
2014-10-01 09:22:42.954	59643	64435	62348	64202
2014-10-01 09:22:42.960	59648	64422	62369	64155
2014-10-01 09:22:42.964	59659	64390	62391	64155
2014-10-01 09:22:42.970	59663	64420	62370	64201
2014-10-01 09:22:42.974	59637	64398	62373	64193
2014-10-01 09:22:42.980	59660	64402	62375	64124
2014-10-01 09:22:42.984	59681	64453	62363	64137
2014-10-01 09:22:42.990	59635	64403	62364	64162
2014-10-01 09:22:42.994	59631	64422	62355	64114
2014-10-01 09:22:43.000	59650	64419	62345	64121
2014-10-01 09:22:43.005	59633	64411	62362	64132
2014-10-01 09:22:43.009	59624	64460	62399	64112
2014-10-01 09:22:43.015	59648	64407	62391	64125
2014-10-01 09:22:43.019	59668	64402	62399	64134
2014-10-01 09:22:43.025	59633	64417	62459	64140
2014-10-01 09:22:43.029	59623	64408	62453	64132
2014-10-01 09:22:43.035	59663	64441	62425	64156
2014-10-01 09:22:43.039	59651	64418	62425	64184
2014-10-01 09:22:43.045	59629	64402	62406	64184
2014-10-01 09:22:43.049	59634	64429	62382	64265
2014-10-01 09:22:43.055	59658	64426	62367	64297
2014-10-01 09:22:43.059	59651	64402	62361	64226
2014-10-01 09:22:43.065	59625	64421	62357	64195
2014-10-01 09:22:43.069	59653	64403	62358	64190
2014-10-01 09:22:43.075	59636	64382	62377	64149
2014-10-01 09:22:43.079	59644	64419	62425	64097
2014-10-01 09:22:43.085	59670	64404	62436	64107
2014-10-01 09:22:43.089	59632	64412	62390	64132
2014-10-01 09:22:43.095	59632	64402	62361	64119
2014-10-01 09:22:43.099	59647	64387	62362	64120
2014-10-01 09:22:43.105	59669	64432	62354	64131
2014-10-01 09:22:43.109	59635	64406	62331	64129
2014-10-01 09:22:43.115	59618	64410	62339	64114
2014-10-01 09:22:43.119	59675	64422	62371	64123
2014-10-01 09:22:43.125	59646	64404	62369	64136
2014-10-01 09:22:43.130	59638	64422	62342	64120
2014-10-01 09:22:43.134	59641	64430	62348	64143
2014-10-01 09:22:43.140	59636	64420	62394	64197
2014-10-01 09:22:43.144	59660	64406	62425	64220
2014-10-01 09:22:43.150	59638	64413	62435	64263
2014-10-01 09:22:43.154	59657	64410	62442	64248
2014-10-01 09:22:43.160	59662	64418	62410	64166
2014-10-01 09:22:43.164	59639	64422	62355	64157
2014-10-01 09:22:43.170	59653	64405	62359	64152
2014-10-01 09:22:43.174	59646	64434	62398	64150
2014-10-01 09:22:43.180	59655	64441	62415	64153
2014-10-01 09:22:43.184	59658	64406	62432	64138
2014-10-01 09:22:43.190	59633	64410	62435	64165
2014-10-01 09:22:43.194	59636	64433	62408	64137
2014-10-01 09:22:43.200	59640	64403	62380	64108
2014-10-01 09:22:43.204	59639	64415	62382	64140
2014-10-01 09:22:43.210	59667	64441	62418	64173
2014-10-01 09:22:43.214	59652	64399	62417	64170
2014-10-01 09:22:43.220	59642	64414	62373	64128
2014-10-01 09:22:43.224	59679	64424	62375	64150
2014-10-01 09:22:43.230	59658	64412	62368	64161
2014-10-01 09:22:43.234	59639	64412	62347	64150
2014-10-01 09:22:43.240	59660	64423	62360	64175
2014-10-01 09:22:43.244	59666	64433	62366	64168
2014-10-01 09:22:43.250	59653	64406	62368	64179
2014-10-01 09:22:43.255	59639	64417	62357	64165
2014-10-01 09:22:43.259	59654	64416	62350	64129
2014-10-01 09:22:43.265	59664	64412	62369	64180
2014-10-01 09:22:43.269	59638	64422	62381	64212
2014-10-01 09:22:43.275	59639	64430	62381	64186
2014-10-01 09:22:43.279	59655	64409	62382	64170
2014-10-01 09:22:43.285	59649	64414	62393	64151
2014-10-01 09:22:43.289	59657	64430	62389	64165
2014-10-01 09:22:43.295	59667	64407	62374	64178
2014-10-01 09:22:43.299	59654	64459	62363	64159
2014-10-01 09:22:43.305	59643	64424	62341	64142
2014-10-01 09:22:43.309	59657	64399	62326	64091
2014-10-01 09:22:43.315	59651	64448	62328	64073
2014-10-01 09:22:43.319	59654	64415	62325	64100
2014-10-01 09:22:43.325	59669	64405	62327	64116
2014-10-01 09:22:43.329	59646	64424	62338	64162
2014-10-01 09:22:43.335	59677	64427	62340	64198
2014-10-01 09:22:43.339	59652	64408	62350	64203
2014-10-01 09:22:43.345	59630	64434	62356	64187
2014-10-01 09:22:43.349	59677	64421	62341	64175
2014-10-01 09:22:43.355	59635	64409	62355	64197
2014-10-01 09:22:43.359	59656	64443	62383	64207
2014-10-01 09:22:43.365	59654	64401	62398	64208
2014-10-01 09:22:43.369	59614	64408	62422	64218
2014-10-01 09:22:43.375	59670	64413	62425	64214
2014-10-01 09:22:43.380	59666	64417	62403	64154
2014-10-01 09:22:43.384	59645	64440	62404	64087
2014-10-01 09:22:43.390	59647	64415	62409	64110
2014-10-01 09:22:43.394	59644	64417	62402	64120
2014-10-01 09:22:43.400	59677	64408	62425	64109
2014-10-01 09:22:43.404	59651	64419	62428	64179
2014-10-01 09:22:43.410	59637	64432	62402	64216
2014-10-01 09:22:43.414	59681	64411	62389	64188
2014-10-01 09:22:43.420	59652	64424	62354	64183
2014-10-01 09:22:43.424	59646	64444	62361	64149
2014-10-01 09:22:43.430	59673	64429	62398	64135
2014-10-01 09:22:43.434	59655	64432	62383	64166
2014-10-01 09:22:43.440	59659	64435	62376	64171
2014-10-01 09:22:43.444	59672	64423	62372	64221
2014-10-01 09:22:43.450	59663	64423	62361	64237
2014-10-01 09:22:43.454	59648	64408	62370	64182
2014-10-01 09:22:43.460	59653	64441	62387	64141
2014-10-01 09:22:43.464	59679	64448	62410	64111
2014-10-01 09:22:43.470	59661	64409	62401	64149
2014-10-01 09:22:43.474	59636	64431	62385	64152
2014-10-01 09:22:43.480	59680	64430	62384	64142
2014-10-01 09:22:43.484	59695	64430	62382	64188
2014-10-01 09:22:43.490	59642	64438	62397	64195
2014-10-01 09:22:43.494	59645	64404	62411	64175
2014-10-01 09:22:43.500	59664	64419	62397	64130
2014-10-01 09:22:43.505	59654	64447	62365	64149
2014-10-01 09:22:43.509	59649	64429	62358	64174
2014-10-01 09:22:43.515	59656	64403	62391	64137
2014-10-01 09:22:43.519	59673	64413	62411	64138
2014-10-01 09:22:43.525	59646	64416	62399	64125
2014-10-01 09:22:43.529	59648	64404	62382	64127
2014-10-01 09:22:43.535	59675	64418	62361	64153
2014-10-01 09:22:43.539	59659	64417	62369	64175
2014-10-01 09:22:43.545	59650	64420	62401	64219
2014-10-01 09:22:43.549	59642	64423	62385	64226
2014-10-01 09:22:43.555	59673	64422	62356	64205
2014-10-01 09:22:43.559	59669	64433	62363	64175
2014-10-01 09:22:43.565	59663	64412	62391	64158
2014-10-01 09:22:43.569	59680	64417	62431	64176
2014-10-01 09:22:43.575	59650	64414	62426	64176
2014-10-01 09:22:43.579	59666	64401	62394	64163
2014-10-01 09:22:43.585	59658	64430	62386	64151
2014-10-01 09:22:43.589	59667	64422	62380	64136
2014-10-01 09:22:43.595	59684	64412	62375	64163
2014-10-01 09:22:43.599	59648	64429	62386	64163
2014-10-01 09:22:43.605	59677	64427	62402	64133
2014-10-01 09:22:43.609	59672	64418	62420	64139
2014-10-01 09:22:43.615	59670	64417	62416	64147
2014-10-01 09:22:43.619	59675	64410	62393	64203
2014-10-01 09:22:43.625	59647	64430	62379	64241
2014-10-01 09:22:43.630	59667	64444	62368	64207
2014-10-01 09:22:43.634	59669	64412	62372	64170
2014-10-01 09:22:43.640	59681	64427	62376	64145
2014-10-01 09:22:43.644	59668	64433	62382	64179
2014-10-01 09:22:43.650	59665	64434	62397	64189
2014-10-01 09:22:43.654	59685	64444	62363	64186
2014-10-01 09:22:43.660	59647	64431	62340	64198
2014-10-01 09:22:43.664	59666	64446	62392	64152
2014-10-01 09:22:43.670	59677	64432	62406	64155
2014-10-01 09:22:43.674	59652	64438	62367	64148
2014-10-01 09:22:43.680	59671	64454	62356	64118
2014-10-01 09:22:43.684	59667	64416	62375	64140
2014-10-01 09:22:43.690	59665	64412	62369	64127
2014-10-01 09:22:43.694	59655	64434	62341	64135
2014-10-01 09:22:43.700	59644	64427	62350	64120
2014-10-01 09:22:43.704	59670	64417	62375	64086
2014-10-01 09:22:43.710	59655	64426	62384	64131
2014-10-01 09:22:43.714	59656	64411	62391	64166
2014-10-01 09:22:43.720	59682	64418	62395	64220
2014-10-01 09:22:43.724	59659	64421	62416	64252
2014-10-01 09:22:43.730	59662	64401	62441	64228
2014-10-01 09:22:43.734	59671	64421	62441	64230
2014-10-01 09:22:43.740	59660	64409	62410	64237
2014-10-01 09:22:43.744	59666	64406	62388	64235
2014-10-01 09:22:43.750	59655	64417	62408	64234
2014-10-01 09:22:43.755	59657	64418	62396	64225
2014-10-01 09:22:43.759	59671	64432	62385	64187
2014-10-01 09:22:43.765	59661	64418	62388	64144
2014-10-01 09:22:43.769	59687	64409	62364	64111
2014-10-01 09:22:43.775	59694	64428	62381	64102
2014-10-01 09:22:43.779	59663	64436	62388	64109
2014-10-01 09:22:43.785	59647	64426	62393	64082
2014-10-01 09:22:43.789	59673	64425	62425	64098
2014-10-01 09:22:43.795	59710	64439	62426	64155
2014-10-01 09:22:43.799	59669	64439	62441	64153
2014-10-01 09:22:43.805	59656	64410	62439	64155
2014-10-01 09:22:43.809	59667	64419	62420	64210
2014-10-01 09:22:43.815	59665	64443	62438	64229
2014-10-01 09:22:43.819	59691	64412	62438	64223
2014-10-01 09:22:43.825	59664	64415	62408	64258
2014-10-01 09:22:43.829	59652	64443	62396	64245
2014-10-01 09:22:43.835	59684	64433	62374	64195
2014-10-01 09:22:43.839	59688	64433	62345	64204
2014-10-01 09:22:43.845	59654	64443	62353	64210
2014-10-01 09:22:43.849	59649	64425	62353	64186
2014-10-01 09:22:43.855	59680	64403	62355	64151
2014-10-01 09:22:43.859	59680	64423	62368	64122
2014-10-01 09:22:43.865	59687	64442	62371	64112
2014-10-01 09:22:43.869	59647	64425	62392	64084
2014-10-01 09:22:43.875	59646	64419	62409	64105
2014-10-01 09:22:43.880	59709	64437	62394	64169
2014-10-01 09:22:43.884	59648	64422	62376	64194
2014-10-01 09:22:43.890	59654	64397	62380	64217
2014-10-01 09:22:43.894	59723	64416	62370	64214
2014-10-01 09:22:43.900	59664	64413	62364	64194
2014-10-01 09:22:43.904	59669	64397	62372	64187
2014-10-01 09:22:43.910	59686	64423	62362	64147
2014-10-01 09:22:43.914	59670	64436	62391	64138
2014-10-01 09:22:43.920	59702	64419	62411	64173
2014-10-01 09:22:43.924	59662	64408	62412	64177
2014-10-01 09:22:43.930	59674	64401	62425	64190
2014-10-01 09:22:43.934	59693	64401	62408	64202
2014-10-01 09:22:43.940	59671	64426	62416	64183
2014-10-01 09:22:43.944	59686	64421	62415	64178
2014-10-01 09:22:43.950	59655	64429	62403	64184
2014-10-01 09:22:43.954	59683	64455	62386	64182
2014-10-01 09:22:43.960	59698	64428	62356	64161
2014-10-01 09:22:43.964	59661	64416	62401	64157
2014-10-01 09:22:43.970	59655	64428	62430	64188
2014-10-01 09:22:43.974	59695	64422	62410	64208
2014-10-01 09:22:43.980	59705	64418	62411	64221
2014-10-01 09:22:43.984	59631	64426	62416	64197
2014-10-01 09:22:43.990	59692	64432	62430	64149
2014-10-01 09:22:43.994	59711	64431	62419	64153
2014-10-01 09:22:44.000	59659	64434	62390	64155
2014-10-01 09:22:44.005	59694	64428	62362	64126
2014-10-01 09:22:44.009	59667	64424	62369	64109
2014-10-01 09:22:44.015	59697	64416	62406	64109
2014-10-01 09:22:44.019	59675	64411	62393	64122
2014-10-01 09:22:44.025	59647	64410	62366	64162
2014-10-01 09:22:44.029	59705	64397	62364	64227
2014-10-01 09:22:44.035	59661	64428	62380	64234
2014-10-01 09:22:44.039	59669	64450	62427	64249
2014-10-01 09:22:44.045	59684	64408	62456	64313
2014-10-01 09:22:44.049	59664	64413	62424	64286
2014-10-01 09:22:44.055	59680	64422	62406	64227
2014-10-01 09:22:44.059	59664	64409	62413	64202
2014-10-01 09:22:44.065	59670	64420	62404	64178
2014-10-01 09:22:44.069	59681	64422	62397	64168
2014-10-01 09:22:44.075	59661	64433	62376	64159
2014-10-01 09:22:44.079	59673	64439	62373	64145
2014-10-01 09:22:44.085	59711	64444	62397	64113
2014-10-01 09:22:44.089	59685	64438	62398	64085
2014-10-01 09:22:44.095	59651	64422	62399	64075
2014-10-01 09:22:44.099	59682	64427	62408	64090
2014-10-01 09:22:44.105	59702	64436	62425	64138
2014-10-01 09:22:44.109	59694	64422	62432	64167
2014-10-01 09:22:44.115	59647	64422	62410	64170
2014-10-01 09:22:44.119	59676	64441	62397	64203
2014-10-01 09:22:44.125	59720	64427	62384	64209
2014-10-01 09:22:44.130	59664	64436	62359	64196
2014-10-01 09:22:44.134	59649	64423	62376	64238
2014-10-01 09:22:44.140	59677	64411	62394	64237
2014-10-01 09:22:44.144	59715	64432	62416	64211
2014-10-01 09:22:44.150	59651	64433	62442	64222
2014-10-01 09:22:44.154	59643	64439	62421	64217
2014-10-01 09:22:44.160	59706	64421	62421	64221
2014-10-01 09:22:44.164	59659	64432	62415	64211
2014-10-01 09:22:44.170	59687	64431	62428	64185
2014-10-01 09:22:44.174	59675	64409	62450	64161
2014-10-01 09:22:44.180	59680	64424	62407	64135
2014-10-01 09:22:44.184	59719	64423	62386	64111
2014-10-01 09:22:44.190	59650	64423	62377	64058
2014-10-01 09:22:44.194	59695	64428	62369	64054
2014-10-01 09:22:44.200	59709	64423	62366	64138
2014-10-01 09:22:44.204	59663	64425	62375	64184
2014-10-01 09:22:44.210	59682	64437	62426	64185
2014-10-01 09:22:44.214	59660	64414	62420	64217
2014-10-01 09:22:44.220	59675	64410	62396	64209
2014-10-01 09:22:44.224	59693	64407	62415	64175
2014-10-01 09:22:44.230	59659	64420	62435	64202
2014-10-01 09:22:44.234	59688	64440	62442	64216
2014-10-01 09:22:44.240	59699	64422	62426	64219
2014-10-01 09:22:44.244	59657	64447	62422	64194
2014-10-01 09:22:44.250	59684	64439	62423	64175
2014-10-01 09:22:44.255	59700	64437	62412	64235
2014-10-01 09:22:44.259	59675	64434	62402	64250
2014-10-01 09:22:44.265	59661	64408	62397	64249
2014-10-01 09:22:44.269	59683	64428	62386	64251
2014-10-01 09:22:44.275	59687	64435	62368	64222
2014-10-01 09:22:44.279	59643	64434	62372	64216
2014-10-01 09:22:44.285	59671	64429	62374	64143
2014-10-01 09:22:44.289	59684	64453	62375	64103
2014-10-01 09:22:44.295	59667	64415	62374	64112
2014-10-01 09:22:44.299	59679	64397	62357	64057
2014-10-01 09:22:44.305	59659	64444	62366	64064
2014-10-01 09:22:44.309	59687	64423	62364	64110
2014-10-01 09:22:44.315	59685	64410	62354	64163
2014-10-01 09:22:44.319	59654	64406	62412	64223
2014-10-01 09:22:44.325	59684	64444	62446	64225
2014-10-01 09:22:44.329	59691	64441	62420	64231
2014-10-01 09:22:44.335	59684	64408	62436	64248
2014-10-01 09:22:44.339	59660	64443	62447	64253
2014-10-01 09:22:44.345	59676	64422	62427	64231
2014-10-01 09:22:44.349	59701	64398	62420	64213
2014-10-01 09:22:44.355	59675	64440	62394	64215
2014-10-01 09:22:44.359	59684	64450	62393	64204
2014-10-01 09:22:44.365	59679	64438	62420	64228
2014-10-01 09:22:44.369	59696	64448	62414	64222
2014-10-01 09:22:44.375	59693	64441	62396	64166
2014-10-01 09:22:44.380	59640	64444	62411	64153
2014-10-01 09:22:44.384	59701	64437	62443	64111
2014-10-01 09:22:44.390	59703	64426	62473	64067
2014-10-01 09:22:44.394	59643	64427	62527	64068
2014-10-01 09:22:44.400	59685	64419	62541	64074
2014-10-01 09:22:44.404	59688	64448	62518	64123
2014-10-01 09:22:44.410	59685	64452	62497	64190
2014-10-01 09:22:44.414	59686	64428	62453	64233
2014-10-01 09:22:44.420	59661	64441	62434	64270
2014-10-01 09:22:44.424	59670	64435	62401	64265
2014-10-01 09:22:44.430	59682	64426	62362	64211
2014-10-01 09:22:44.434	59681	64420	62341	64198
2014-10-01 09:22:44.440	59672	64420	62323	64211
2014-10-01 09:22:44.444	59680	64455	62335	64199
2014-10-01 09:22:44.450	59687	64429	62366	64207
2014-10-01 09:22:44.454	59698	64399	62419	64218
2014-10-01 09:22:44.460	59691	64432	62438	64251
2014-10-01 09:22:44.464	59668	64420	62427	64256
2014-10-01 09:22:44.470	59711	64420	62408	64201
2014-10-01 09:22:44.474	59694	64428	62390	64195
2014-10-01 09:22:44.480	59688	64428	62422	64173
2014-10-01 09:22:44.484	59720	64463	62410	64114
2014-10-01 09:22:44.490	59651	64431	62386	64109
2014-10-01 09:22:44.494	59688	64431	62403	64108
2014-10-01 09:22:44.500	59723	64468	62403	64123
2014-10-01 09:22:44.505	59663	64440	62404	64140
2014-10-01 09:22:44.509	59694	64432	62399	64151
2014-10-01 09:22:44.515	59692	64453	62408	64196
2014-10-01 09:22:44.519	59693	64452	62428	64240
2014-10-01 09:22:44.525	59707	64444	62430	64271
2014-10-01 09:22:44.529	59670	64461	62417	64271
2014-10-01 09:22:44.535	59669	64470	62401	64234
2014-10-01 09:22:44.539	59678	64445	62414	64206
2014-10-01 09:22:44.545	59689	64415	62415	64186
2014-10-01 09:22:44.549	59683	64434	62396	64163
2014-10-01 09:22:44.555	59676	64446	62409	64179
2014-10-01 09:22:44.559	59681	64439	62432	64199
2014-10-01 09:22:44.565	59678	64439	62421	64199
2014-10-01 09:22:44.569	59697	64423	62404	64208
2014-10-01 09:22:44.575	59695	64461	62429	64196
2014-10-01 09:22:44.579	59687	64432	62439	64156
2014-10-01 09:22:44.585	59678	64418	62409	64121
2014-10-01 09:22:44.589	59657	64462	62422	64126
2014-10-01 09:22:44.595	59689	64411	62428	64147
2014-10-01 09:22:44.599	59704	64426	62416	64153
2014-10-01 09:22:44.605	59665	64459	62451	64169
2014-10-01 09:22:44.609	59685	64429	62458	64182
2014-10-01 09:22:44.615	59706	64408	62440	64227
2014-10-01 09:22:44.619	59674	64439	62444	64284
2014-10-01 09:22:44.625	59686	64444	62440	64285
2014-10-01 09:22:44.630	59703	64413	62453	64261
2014-10-01 09:22:44.634	59682	64435	62440	64211
2014-10-01 09:22:44.640	59703	64428	62434	64187
2014-10-01 09:22:44.644	59706	64444	62443	64203
2014-10-01 09:22:44.650	59685	64448	62405	64201
2014-10-01 09:22:44.654	59703	64439	62433	64187
2014-10-01 09:22:44.660	59695	64468	62466	64166
2014-10-01 09:22:44.664	59682	64458	62423	64179
2014-10-01 09:22:44.670	59705	64453	62387	64183
2014-10-01 09:22:44.674	59714	64435	62382	64175
2014-10-01 09:22:44.680	59683	64459	62435	64201
2014-10-01 09:22:44.684	59682	64474	62471	64201
2014-10-01 09:22:44.690	59729	64442	62468	64221
2014-10-01 09:22:44.694	59702	64458	62462	64200
2014-10-01 09:22:44.700	59664	64466	62418	64156
2014-10-01 09:22:44.704	59684	64459	62409	64189
2014-10-01 09:22:44.710	59698	64447	62431	64172
2014-10-01 09:22:44.714	59703	64448	62431	64168
2014-10-01 09:22:44.720	59687	64457	62410	64190
2014-10-01 09:22:44.724	59683	64441	62378	64185
2014-10-01 09:22:44.730	59681	64431	62400	64179
2014-10-01 09:22:44.734	59708	64458	62419	64157
2014-10-01 09:22:44.740	59720	64468	62415	64181
2014-10-01 09:22:44.744	59683	64437	62459	64199
2014-10-01 09:22:44.750	59694	64428	62476	64201
2014-10-01 09:22:44.755	59709	64445	62459	64220
2014-10-01 09:22:44.759	59715	64475	62459	64209
2014-10-01 09:22:44.765	59692	64444	62457	64201
2014-10-01 09:22:44.769	59681	64420	62454	64235
2014-10-01 09:22:44.775	59692	64474	62438	64258
2014-10-01 09:22:44.779	59688	64454	62428	64216
2014-10-01 09:22:44.785	59716	64427	62451	64176
2014-10-01 09:22:44.789	59691	64463	62455	64150
2014-10-01 09:22:44.795	59682	64460	62446	64108
2014-10-01 09:22:44.799	59717	64455	62466	64143
2014-10-01 09:22:44.805	59701	64456	62474	64195
2014-10-01 09:22:44.809	59690	64459	62448	64179
2014-10-01 09:22:44.815	59712	64484	62442	64199
2014-10-01 09:22:44.819	59734	64471	62481	64243
2014-10-01 09:22:44.825	59702	64478	62487	64257
2014-10-01 09:22:44.829	59690	64485	62464	64284
2014-10-01 09:22:44.835	59732	64452	62444	64293
2014-10-01 09:22:44.839	59724	64491	62414	64240
2014-10-01 09:22:44.845	59700	64474	62422	64209
2014-10-01 09:22:44.849	59714	64446	62439	64213
2014-10-01 09:22:44.855	59706	64480	62453	64188
2014-10-01 09:22:44.859	59702	64465	62449	64176
2014-10-01 09:22:44.865	59714	64469	62444	64191
2014-10-01 09:22:44.869	59684	64449	62459	64192
2014-10-01 09:22:44.875	59698	64449	62410	64190
2014-10-01 09:22:44.880	59715	64487	62375	64173
2014-10-01 09:22:44.884	59699	64458	62373	64131
2014-10-01 09:22:44.890	59717	64436	62384	64132
2014-10-01 09:22:44.894	59718	64468	62437	64178
2014-10-01 09:22:44.900	59698	64490	62446	64205
2014-10-01 09:22:44.904	59700	64465	62443	64234
2014-10-01 09:22:44.910	59729	64459	62462	64272
2014-10-01 09:22:44.914	59705	64469	62449	64282
2014-10-01 09:22:44.920	59680	64454	62412	64275
2014-10-01 09:22:44.924	59720	64442	62376	64267
2014-10-01 09:22:44.930	59730	64466	62366	64242
2014-10-01 09:22:44.934	59719	64499	62382	64216
2014-10-01 09:22:44.940	59711	64454	62384	64207
2014-10-01 09:22:44.944	59722	64461	62406	64211
2014-10-01 09:22:44.950	59735	64495	62437	64247
2014-10-01 09:22:44.954	59718	64448	62445	64223
2014-10-01 09:22:44.960	59695	64467	62482	64143
2014-10-01 09:22:44.964	59712	64477	62500	64125
2014-10-01 09:22:44.970	59729	64466	62513	64123
2014-10-01 09:22:44.974	59719	64476	62527	64131
2014-10-01 09:22:44.980	59725	64457	62496	64166
2014-10-01 09:22:44.984	59716	64467	62464	64205
2014-10-01 09:22:44.990	59732	64477	62440	64216
2014-10-01 09:22:44.994	59732	64467	62426	64202
[truncated: 14,000 more rows]
