# Supplementary material for: Seismic monitoring of small alpine rockfalls – validity, precision and limitations
Source: Copernicus journal article supplement (doi:10.5194/esurf-5-653-2017), 2017-10-16
Supplement: Supplementary file 2 [file esurf-5-653-2017-supplement.zip › lidar.txt]

ID	volume (m^3)	volume_error (m^3)	x (UTM)	y (UTM)
1	0.201	0.004602	415511.1632874	5156534.9176787
2	0.063	0.006681	415522.5349444	5156542.2050999
3	0.201	0.004602	415541.3868532	5156843.5712751
4	0.175	0.011337	415565.4772505	5156844.9019536
5	0.053	0.0043365	415591.4122747	5156934.4508349
6	0.416	0.0208125	415950.0192841	5158212.8811692
7	0.891	0.0384285	415952.1103301	5157828.5355531
8	0.258	0.0138285	416005.0302282	5157897.0392563
9	0.192	0.010023	416116.3236338	5158797.2706953
10	2.338	0.0854475	416037.3939981	5158648.7743199
