# Supplementary material for: Seismic monitoring of small alpine rockfalls – validity, precision and limitations
Source: Copernicus journal article supplement (doi:10.5194/esurf-5-653-2017), 2017-10-16
Supplement: Supplementary file 2 [file esurf-5-653-2017-supplement.zip › seismic_stations.txt]

ID	name	x	y	z	sensor_type	logger_type
LAU02	Gate of China	415766.156496682	5157909.51206686	1524	TC120s	Cube3ext
LAU03	Blatters Herbs	415398.027931324	5156814.37678964	1595	TC120s	Cube3ext
LAU04	Mosquito Fabric	416235.978307252	5158776.56840365	832	TC120s	Cube3ext
LAU05	Funny Rain	416035.238701005	5157843.27911248	888	TC120s	Cube3ext
